# Supplementary material for: Genome-wide DNA methylation changes in CD19+ B cells from relapsing-remitting multiple sclerosis patients
Source: PubMed Central journal article supplement (PMC6258668; doi:10.1038/s41598-018-35603-0), 2018-11-27
Supplement: 41598_2018_35603_MOESM1_ESM.pdf [file 41598_2018_35603_MOESM1_ESM.pdf]

Genome-wide DNA methylation changes in CD19+ B cells from relapsing-remitting multiple sclerosis patients

**SUPPLEMENTAL FILES**

Vicki E. Maltby<sup>1,2#</sup>, Rodney A. Lea<sup>1,3#</sup>, Moira C. Graves<sup>1,2</sup>, Katherine A. Sanders<sup>2,4</sup>, Miles C. Benton<sup>1,3</sup>, Lotti Tajouri<sup>4</sup>, Rodney J. Scott<sup>2,5,6</sup> and Jeannette Lechner-Scott<sup>1,2,7\*</sup>

1. School of Medicine and Public Health, University of Newcastle, Newcastle, Australia
2. Centre for Information Based Medicine, Hunter Medical Research Institute, Newcastle, Australia
3. Institute of Health and Biomedical Innovation, Queensland University of Technology, Brisbane Australia
4. Faculty of Health Sciences and Medicine, Bond University, Gold Coast, Australia
5. School of Biomedical Sciences and Pharmacy, University of Newcastle, Newcastle, Australia
6. Medical Genetics, Pathology North, John Hunter Hospital, Newcastle, Australia
7. Department of Neurology, John Hunter Hospital, Newcastle, Australia

# These authors contributed equally to this manuscript

Author emails:

VEM: <vicki.e.maltby@newcastle.edu.au>

RAL: <rodney.a.lea@gmail.com>

MCG: <moira.graves@newcastle.edu.au>

KAS: <ksanders@bond.edu.au>

MCB: <m.benton@qut.edu.au>

LT: <ltajouri@bond.edu.au>

RJS: <rodney.scott@newcastle.edu.au>

\*Corresponding Author: Jeannette Lechner-Scott

Email: Jeannette.lechner-scott@hnehealth.nsw.gov.au

Phone: +61 2 4921 3540

Mailing address: Locked Bag 1, Hunter Region Mail Centre,  
NSW Australia 2310

| IlmnID     | Infin | Genc | CHR | MAPINFO   | UCSC_RefGene_Na   | ks.score | ks.pval  | logP    | median_MS  | median_HC   | median_diff |
|------------|-------|------|-----|-----------|-------------------|----------|----------|---------|------------|-------------|-------------|
| cg14437551 | I     | 37   | 6   | 31539986  | LTA;LTA;LTA       | 0.62     | 0.0001   | 3.98291 | 0.69538633 | 0.191327929 | 0.504       |
| cg14597739 | I     | 37   | 6   | 31539998  | LTA;LTA;LTA       | 0.62     | 0.0001   | 3.98291 | 0.73580609 | 0.249314746 | 0.486       |
| cg14252149 | II    | 37   | 1   | 236707045 | LGALS8;LGALS8;LG/ | 0.42     | 0.02991  | 1.52413 | 0.50216265 | 0.045509279 | 0.457       |
| cg20429104 | I     | 37   | 18  | 74114570  | ZNF516            | 0.62     | 0.0001   | 3.98291 | 0.40173711 | 0.859184844 | -0.457      |
| cg11327657 | I     | 37   | 21  | 46388162  | C21orf70          | 0.54     | 0.0014   | 2.85345 | 0.4465553  | 0.896435533 | -0.45       |
| cg26872907 | I     | 37   | 6   | 161796854 | PARK2;PARK2;PARK  | 0.54     | 0.0014   | 2.85345 | 0.3612249  | 0.798199879 | -0.437      |
| cg25131632 | I     | 37   | 10  | 94549040  |                   | 0.5      | 0.00432  | 2.36443 | 0.65451673 | 0.221307125 | 0.433       |
| cg00033213 | II    | 37   | 8   | 144399335 | TOP1MT            | 0.42     | 0.02991  | 1.52413 | 0.08705082 | 0.50630562  | -0.419      |
| cg09621572 | I     | 37   | 6   | 31539973  | LTA;LTA;LTA       | 0.71     | 4.57E-06 | 5.34042 | 0.65896587 | 0.240829232 | 0.418       |
| cg16219283 | I     | 37   | 6   | 31540002  | LTA;LTA;LTA       | 0.62     | 0.0001   | 3.98291 | 0.71711418 | 0.299699519 | 0.417       |
| cg01081438 | II    | 37   | 1   | 92417998  | BRDT;BRDT         | 0.46     | 0.01197  | 1.92207 | 0.46656447 | 0.05393621  | 0.413       |
| cg04478251 | I     | 37   | 17  | 998432    | ABR;ABR;ABR       | 0.54     | 0.0014   | 2.85345 | 0.40051125 | 0.812453074 | -0.412      |
| cg12165551 | II    | 37   | 11  | 8385712   |                   | 0.58     | 0.00041  | 3.39184 | 0.35058395 | 0.761202348 | -0.411      |
| cg10838410 | I     | 37   | 12  | 6659524   | IFFO1;IFFO1;IFFO1 | 0.54     | 0.0014   | 2.85345 | 0.28851717 | 0.695974452 | -0.407      |
| cg05205074 | II    | 37   | 14  | 107259880 |                   | 0.5      | 0.00432  | 2.36443 | 0.68853116 | 0.28268381  | 0.406       |
| cg03728799 | II    | 37   | 17  | 74978687  |                   | 0.54     | 0.0014   | 2.85345 | 0.62975839 | 0.224430873 | 0.405       |
| cg05260077 | II    | 37   | 21  | 37531890  |                   | 0.62     | 0.0001   | 3.98291 | 0.40645654 | 0.81018095  | -0.404      |
| cg19097880 | II    | 37   | 11  | 128160637 |                   | 0.62     | 0.0001   | 3.98291 | 0.60288677 | 0.205480441 | 0.397       |
| cg25684151 | II    | 37   | 8   | 126588554 |                   | 0.54     | 0.0014   | 2.85345 | 0.45240362 | 0.846237291 | -0.394      |
| cg11597902 | I     | 37   | 17  | 75096239  |                   | 0.54     | 0.0014   | 2.85345 | 0.42925166 | 0.82268919  | -0.393      |
| cg17496921 | II    | 37   | 19  | 11406993  | TSPAN16           | 0.58     | 0.00041  | 3.39184 | 0.43359443 | 0.825766576 | -0.392      |
| cg01491428 | II    | 37   | 16  | 2334163   | ABCA3             | 0.5      | 0.00432  | 2.36443 | 0.780325   | 0.389269439 | 0.391       |
| cg20078972 | II    | 37   | 19  | 15391832  | BRD4;BRD4         | 0.5      | 0.00432  | 2.36443 | 0.39697315 | 0.78771025  | -0.391      |
| cg08106973 | II    | 37   | 1   | 40399833  |                   | 0.58     | 0.00041  | 3.39184 | 0.36164548 | 0.750917866 | -0.389      |
| cg04493247 | I     | 37   | 7   | 72719224  | NSUN5;NSUN5;NSL   | 0.62     | 0.0001   | 3.98291 | 0.40689211 | 0.794585356 | -0.388      |
| cg21999229 | I     | 37   | 6   | 31540014  | LTA;LTA;LTA       | 0.67     | 2.34E-05 | 4.63072 | 0.65159786 | 0.265005506 | 0.387       |
| cg23447233 | I     | 37   | 4   | 1295047   | MAEA;MAEA         | 0.54     | 0.0014   | 2.85345 | 0.4292295  | 0.814733655 | -0.386      |
| cg24801230 | II    | 37   | 17  | 43978533  | MAPT;MAPT;MAPT    | 0.42     | 0.02991  | 1.52413 | 0.4566855  | 0.843069079 | -0.386      |
| cg14441276 | II    | 37   | 6   | 31539735  | LTA;LTA           | 0.58     | 0.00041  | 3.39184 | 0.58501317 | 0.200005586 | 0.385       |
| cg26709988 | I     | 37   | 16  | 84860918  | CRISPLD2          | 0.58     | 0.00041  | 3.39184 | 0.52329806 | 0.906781459 | -0.383      |
| cg16651347 | II    | 37   | 1   | 175042297 | TNN               | 0.54     | 0.0014   | 2.85345 | 0.4062851  | 0.788424417 | -0.382      |
| cg08165960 | I     | 37   | 15  | 101777800 | CHSY1             | 0.54     | 0.0014   | 2.85345 | 0.40544115 | 0.784040377 | -0.379      |

|            |    |    |    |           |                   |      |          |         |            |             |        |
|------------|----|----|----|-----------|-------------------|------|----------|---------|------------|-------------|--------|
| cg00009523 | II | 37 | 2  | 1165351   | SNTG2             | 0.5  | 0.00432  | 2.36443 | 0.48728992 | 0.864314202 | -0.377 |
| cg25376491 | II | 37 | 5  | 179192524 | MAML1             | 0.62 | 0.0001   | 3.98291 | 0.47798731 | 0.852653949 | -0.375 |
| cg07714276 | II | 37 | 6  | 7169632   | RREB1;RREB1;RREB  | 0.58 | 0.00041  | 3.39184 | 0.40044912 | 0.775403653 | -0.375 |
| cg06684088 | II | 37 | 7  | 119131    |                   | 0.62 | 0.0001   | 3.98291 | 0.42419478 | 0.799525509 | -0.375 |
| cg21574822 | II | 37 | 4  | 2431998   |                   | 0.58 | 0.00041  | 3.39184 | 0.3018431  | 0.674999564 | -0.373 |
| cg17768768 | I  | 37 | 7  | 2948123   | CARD11            | 0.5  | 0.00432  | 2.36443 | 0.64777594 | 0.275107139 | 0.373  |
| cg07053114 | I  | 37 | 10 | 129794994 | PTPRE             | 0.54 | 0.0014   | 2.85345 | 0.51019172 | 0.880607819 | -0.37  |
| cg01827633 | II | 37 | 2  | 219610103 | TTLL4             | 0.62 | 0.0001   | 3.98291 | 0.37726981 | 0.746304149 | -0.369 |
| cg15730481 | I  | 37 | 7  | 1126318   | GPER;C7orf50;C7or | 0.58 | 0.00041  | 3.39184 | 0.6084354  | 0.239271056 | 0.369  |
| cg22324981 | I  | 37 | 18 | 77283493  | NFATC1;NFATC1;NF  | 0.71 | 4.57E-06 | 5.34042 | 0.67162002 | 0.304073641 | 0.368  |
| cg03801286 | II | 37 | 21 | 35884508  | KCNE1             | 0.58 | 0.00041  | 3.39184 | 0.4232379  | 0.790599289 | -0.367 |
| cg06468347 | II | 37 | 17 | 3705875   | ITGAE             | 0.58 | 0.00041  | 3.39184 | 0.37331492 | 0.737860922 | -0.365 |
| cg22528270 | I  | 37 | 7  | 151505116 | PRKAG2;PRKAG2     | 0.58 | 0.00041  | 3.39184 | 0.50073755 | 0.865203411 | -0.364 |
| cg05834845 | I  | 37 | 3  | 195489306 | MUC4;MUC4;MUC4    | 0.67 | 2.34E-05 | 4.63072 | 0.54201556 | 0.904551962 | -0.363 |
| cg21923525 | II | 37 | 18 | 9474143   | RALBP1            | 0.58 | 0.00041  | 3.39184 | 0.37944248 | 0.742317369 | -0.363 |
| cg15919816 | II | 37 | 4  | 2431872   |                   | 0.67 | 2.34E-05 | 4.63072 | 0.30500907 | 0.667170405 | -0.362 |
| cg13573745 | II | 37 | 9  | 97405553  |                   | 0.58 | 0.00041  | 3.39184 | 0.39442112 | 0.754020757 | -0.36  |
| cg18443571 | II | 37 | 15 | 90547692  | ZNF710            | 0.58 | 0.00041  | 3.39184 | 0.39796034 | 0.757273921 | -0.359 |
| cg23244761 | I  | 37 | 6  | 161796850 | PARK2;PARK2;PARK  | 0.54 | 0.0014   | 2.85345 | 0.53576916 | 0.894092416 | -0.358 |
| cg18554789 | II | 37 | 7  | 139432178 | HIPK2;HIPK2       | 0.62 | 0.0001   | 3.98291 | 0.42088941 | 0.778496669 | -0.358 |
| cg01406317 | II | 37 | 16 | 4397291   | Magmas            | 0.54 | 0.0014   | 2.85345 | 0.45288307 | 0.810730051 | -0.358 |
| cg24137448 | II | 37 | 17 | 46189113  | SNX11;SNX11       | 0.5  | 0.00432  | 2.36443 | 0.63771093 | 0.279413764 | 0.358  |
| cg02435083 | II | 37 | 16 | 8943436   |                   | 0.58 | 0.00041  | 3.39184 | 0.42632203 | 0.783368946 | -0.357 |
| cg01479396 | II | 37 | 17 | 7529693   | SHBG;SAT2         | 0.54 | 0.0014   | 2.85345 | 0.43685872 | 0.79342457  | -0.357 |
| cg10323962 | II | 37 | 16 | 87921685  | CA5A              | 0.62 | 0.0001   | 3.98291 | 0.36524149 | 0.721262285 | -0.356 |
| cg03455225 | II | 37 | 3  | 23313729  | UBE2E2            | 0.54 | 0.0014   | 2.85345 | 0.90285244 | 0.550132254 | 0.353  |
| cg15212210 | II | 37 | 11 | 118986793 | C2CD2L            | 0.54 | 0.0014   | 2.85345 | 0.33113503 | 0.683635289 | -0.353 |
| cg24091162 | II | 37 | 17 | 62010456  | CD79B;CD79B;CD79  | 0.5  | 0.00432  | 2.36443 | 0.74104854 | 0.388043088 | 0.353  |
| cg24216966 | I  | 37 | 6  | 31540121  | LTA;LTA;LTA       | 0.62 | 0.0001   | 3.98291 | 0.73085498 | 0.378454606 | 0.352  |
| cg06743610 | II | 37 | 19 | 35630305  | FXYD1;FXYD1       | 0.54 | 0.0014   | 2.85345 | 0.42644578 | 0.778448663 | -0.352 |
| cg21159128 | I  | 37 | 1  | 54693933  | SSBP3;SSBP3;SSBP3 | 0.5  | 0.00432  | 2.36443 | 0.34571367 | 0.696553039 | -0.351 |
| cg25505880 | II | 37 | 11 | 62574338  | NXF1;NXF1         | 0.58 | 0.00041  | 3.39184 | 0.43125039 | 0.782728734 | -0.351 |
| cg11554335 | II | 37 | 11 | 57336941  | UBE2L6            | 0.67 | 2.34E-05 | 4.63072 | 0.48148726 | 0.82839691  | -0.347 |

|            |    |    |    |                            |      |          |         |            |             |        |
|------------|----|----|----|----------------------------|------|----------|---------|------------|-------------|--------|
| cg19502359 | II | 37 | 11 | 72912441                   | 0.67 | 2.34E-05 | 4.63072 | 0.46594867 | 0.813352199 | -0.347 |
| cg00686823 | II | 37 | 3  | 127311038 TPRA1            | 0.58 | 0.00041  | 3.39184 | 0.36516755 | 0.710945943 | -0.346 |
| cg17169196 | I  | 37 | 6  | 31540026 LTA;LTA;LTA       | 0.67 | 2.34E-05 | 4.63072 | 0.70578347 | 0.359284527 | 0.346  |
| cg23590660 | II | 37 | 12 | 8205602 FOXJ2              | 0.58 | 0.00041  | 3.39184 | 0.37244069 | 0.718468538 | -0.346 |
| cg08782022 | I  | 37 | 16 | 4730136 MGRN1;MGRN1;M      | 0.54 | 0.0014   | 2.85345 | 0.41248001 | 0.758436102 | -0.346 |
| cg26686361 | I  | 37 | 16 | 85964073                   | 0.58 | 0.00041  | 3.39184 | 0.45062438 | 0.796863683 | -0.346 |
| cg18655369 | II | 37 | 19 | 1177575                    | 0.58 | 0.00041  | 3.39184 | 0.38847333 | 0.734849236 | -0.346 |
| cg09470754 | II | 37 | 19 | 55838021 TMEM150B          | 0.62 | 0.0001   | 3.98291 | 0.38765521 | 0.733837483 | -0.346 |
| cg08458487 | II | 37 | 10 | 81709191 SFTPD             | 0.54 | 0.0014   | 2.85345 | 0.47000517 | 0.813749711 | -0.344 |
| cg24012880 | II | 37 | 11 | 44880910 TSPAN18           | 0.62 | 0.0001   | 3.98291 | 0.49612551 | 0.839956312 | -0.344 |
| cg22666015 | II | 37 | 2  | 233981885 INPP5D;INPP5D    | 0.62 | 0.0001   | 3.98291 | 0.42681591 | 0.77030656  | -0.343 |
| cg00975624 | II | 37 | 3  | 159646501                  | 0.54 | 0.0014   | 2.85345 | 0.42482861 | 0.767964143 | -0.343 |
| cg21326139 | II | 37 | 4  | 1294783 MAEA;MAEA          | 0.5  | 0.00432  | 2.36443 | 0.41929622 | 0.762007374 | -0.343 |
| cg24941342 | II | 37 | 11 | 95093809                   | 0.54 | 0.0014   | 2.85345 | 0.51577687 | 0.857412139 | -0.342 |
| cg04072771 | II | 37 | 15 | 55574912 RAB27A            | 0.5  | 0.00432  | 2.36443 | 0.36101315 | 0.703012307 | -0.342 |
| cg06755438 | II | 37 | 2  | 219885614 CCDC108          | 0.62 | 0.0001   | 3.98291 | 0.38443222 | 0.725408479 | -0.341 |
| cg00259404 | II | 37 | 6  | 28885568 TRIM27            | 0.58 | 0.00041  | 3.39184 | 0.45564305 | 0.796921594 | -0.341 |
| cg15235987 | II | 37 | 12 | 132469937 EP400            | 0.62 | 0.0001   | 3.98291 | 0.44414048 | 0.785279661 | -0.341 |
| cg07285167 | II | 37 | 1  | 36948981 CSF3R;CSF3R;CSF3F | 0.62 | 0.0001   | 3.98291 | 0.42001911 | 0.759894849 | -0.34  |
| cg12691572 | I  | 37 | 10 | 114574959 VT11A            | 0.54 | 0.0014   | 2.85345 | 0.47461067 | 0.815109631 | -0.34  |
| cg22907103 | II | 37 | 11 | 61124346 CYBASC3;CYBASC3;  | 0.5  | 0.00432  | 2.36443 | 0.68069615 | 0.340467467 | 0.34   |
| cg04828493 | I  | 37 | 13 | 111328783 CARS2            | 0.5  | 0.00432  | 2.36443 | 0.69014636 | 0.349911651 | 0.34   |
| cg10718056 | II | 37 | 6  | 28884599 TRIM27            | 0.62 | 0.0001   | 3.98291 | 0.53546725 | 0.874190304 | -0.339 |
| cg02688118 | II | 37 | 13 | 114918456                  | 0.62 | 0.0001   | 3.98291 | 0.48027418 | 0.817794277 | -0.338 |
| cg26076724 | I  | 37 | 6  | 15090163                   | 0.58 | 0.00041  | 3.39184 | 0.46457772 | 0.801372498 | -0.337 |
| cg00066854 | II | 37 | 10 | 113987376                  | 0.67 | 2.34E-05 | 4.63072 | 0.42536862 | 0.762867245 | -0.337 |
| cg22111527 | I  | 37 | 11 | 69260136                   | 0.58 | 0.00041  | 3.39184 | 0.43214058 | 0.768696661 | -0.337 |
| cg16409562 | I  | 37 | 14 | 21485900 NDRG2;NDRG2;NDI   | 0.54 | 0.0014   | 2.85345 | 0.55086121 | 0.887593354 | -0.337 |
| cg09284275 | II | 37 | 16 | 15923487 MYH11;MYH11;MY    | 0.62 | 0.0001   | 3.98291 | 0.44618951 | 0.782845588 | -0.337 |
| cg04217515 | I  | 37 | 21 | 46325853 ITGB2;ITGB2       | 0.58 | 0.00041  | 3.39184 | 0.53544508 | 0.872733165 | -0.337 |
| cg11953913 | II | 37 | 5  | 139562873 C5orf32          | 0.67 | 2.34E-05 | 4.63072 | 0.50526837 | 0.840946465 | -0.336 |
| cg02956248 | I  | 37 | 6  | 32120901 PPT2;PRRT1;PPT2   | 0.5  | 0.00432  | 2.36443 | 0.81917587 | 0.483487103 | 0.336  |
| cg04382396 | I  | 37 | 19 | 852311 ELANE;ELANE         | 0.67 | 2.34E-05 | 4.63072 | 0.55555333 | 0.891392299 | -0.336 |

|            |    |    |    |           |                   |      |          |         |            |             |        |
|------------|----|----|----|-----------|-------------------|------|----------|---------|------------|-------------|--------|
| cg18503912 | II | 37 | 19 | 35630279  | FXVD1;FXVD1       | 0.58 | 0.00041  | 3.39184 | 0.44726449 | 0.783455005 | -0.336 |
| cg02896872 | II | 37 | 1  | 226887044 | ITPKB             | 0.5  | 0.00432  | 2.36443 | 0.75028478 | 0.415269482 | 0.335  |
| cg13577149 | II | 37 | 5  | 134783581 | C5orf20           | 0.5  | 0.00432  | 2.36443 | 0.70019725 | 0.365568818 | 0.335  |
| cg04958236 | II | 37 | 6  | 74276973  |                   | 0.67 | 2.34E-05 | 4.63072 | 0.53108506 | 0.865657846 | -0.335 |
| cg24788483 | I  | 37 | 10 | 114911652 | TCF7L2;TCF7L2;TCF | 0.67 | 2.34E-05 | 4.63072 | 0.52093839 | 0.855263332 | -0.334 |
| cg06380691 | II | 37 | 13 | 114828264 | RASA3             | 0.54 | 0.0014   | 2.85345 | 0.32921415 | 0.663060925 | -0.334 |
| cg16786178 | II | 37 | 14 | 75764329  |                   | 0.58 | 0.00041  | 3.39184 | 0.44425002 | 0.778175376 | -0.334 |
| cg07298177 | II | 37 | 16 | 85577847  |                   | 0.54 | 0.0014   | 2.85345 | 0.47507818 | 0.808480003 | -0.333 |
| cg17007896 | II | 37 | 11 | 69261044  |                   | 0.67 | 2.34E-05 | 4.63072 | 0.42835983 | 0.76056709  | -0.332 |
| cg00517080 | II | 37 | 11 | 134098583 | VPS26B            | 0.58 | 0.00041  | 3.39184 | 0.5586226  | 0.226613485 | 0.332  |
| cg25099490 | II | 37 | 14 | 23583133  |                   | 0.5  | 0.00432  | 2.36443 | 0.37326823 | 0.70477854  | -0.332 |
| cg21696012 | II | 37 | 1  | 24131000  | HMGCL;HMGCL       | 0.58 | 0.00041  | 3.39184 | 0.52759659 | 0.85825389  | -0.331 |
| cg26226650 | II | 37 | 3  | 50276265  | GNAI2             | 0.54 | 0.0014   | 2.85345 | 0.39862926 | 0.729858295 | -0.331 |
| cg06298740 | II | 37 | 1  | 227125826 |                   | 0.62 | 0.0001   | 3.98291 | 0.51694367 | 0.846450166 | -0.33  |
| cg25634666 | II | 37 | 11 | 71846788  | FOLR3;FOLR3       | 0.54 | 0.0014   | 2.85345 | 0.43984609 | 0.77005907  | -0.33  |
| cg16206504 | I  | 37 | 13 | 114917223 |                   | 0.54 | 0.0014   | 2.85345 | 0.53323045 | 0.863429784 | -0.33  |
| cg19755815 | II | 37 | 17 | 80873572  | TBCD              | 0.54 | 0.0014   | 2.85345 | 0.6820319  | 0.352167391 | 0.33   |
| cg03310874 | I  | 37 | 7  | 4850260   | RADIL             | 0.62 | 0.0001   | 3.98291 | 0.51653135 | 0.845128574 | -0.329 |
| cg06551697 | II | 37 | 17 | 56612362  |                   | 0.54 | 0.0014   | 2.85345 | 0.43113221 | 0.759827919 | -0.329 |
| cg26831416 | II | 37 | 19 | 39142011  | ACTN4             | 0.62 | 0.0001   | 3.98291 | 0.43049408 | 0.759927343 | -0.329 |
| cg00343906 | II | 37 | 1  | 1696692   | NADK              | 0.58 | 0.00041  | 3.39184 | 0.51733738 | 0.845267015 | -0.328 |
| cg02505177 | II | 37 | 10 | 103574626 | MGEA5;MGEA5       | 0.58 | 0.00041  | 3.39184 | 0.48969406 | 0.161725202 | 0.328  |
| cg13738327 | I  | 37 | 11 | 68139233  | LRP5              | 0.5  | 0.00432  | 2.36443 | 0.61351318 | 0.285541867 | 0.328  |
| cg12249234 | II | 37 | 17 | 25867613  | KSR1              | 0.58 | 0.00041  | 3.39184 | 0.48331469 | 0.810974681 | -0.328 |
| cg17950348 | II | 37 | 7  | 157183466 | DNAJB6            | 0.5  | 0.00432  | 2.36443 | 0.36900824 | 0.695627395 | -0.327 |
| cg20805133 | I  | 37 | 2  | 242802192 | PDCD1             | 0.75 | 7.61E-07 | 6.11857 | 0.59860652 | 0.273911488 | 0.325  |
| cg03857198 | II | 37 | 3  | 152927597 |                   | 0.54 | 0.0014   | 2.85345 | 0.55242006 | 0.877596195 | -0.325 |
| cg11638399 | II | 37 | 8  | 29441416  |                   | 0.5  | 0.00432  | 2.36443 | 0.55571082 | 0.880498279 | -0.325 |
| cg08698943 | II | 37 | 10 | 3509758   |                   | 0.54 | 0.0014   | 2.85345 | 0.38732663 | 0.711857278 | -0.325 |
| cg07698804 | I  | 37 | 17 | 80829309  | TBCD              | 0.54 | 0.0014   | 2.85345 | 0.45178922 | 0.126631473 | 0.325  |
| cg01554529 | I  | 37 | 1  | 11722935  | FBXO6;FBXO44;FBX  | 0.62 | 0.0001   | 3.98291 | 0.52230268 | 0.845934775 | -0.324 |
| cg02570354 | II | 37 | 3  | 31728749  | OSBPL10           | 0.54 | 0.0014   | 2.85345 | 0.45504559 | 0.778881698 | -0.324 |
| cg10147394 | II | 37 | 8  | 11350297  | BLK               | 0.42 | 0.02991  | 1.52413 | 0.6675391  | 0.343104312 | 0.324  |

|            |    |    |    |           |                   |      |          |         |            |             |        |
|------------|----|----|----|-----------|-------------------|------|----------|---------|------------|-------------|--------|
| cg08400494 | I  | 37 | 13 | 111318490 | CARS2             | 0.54 | 0.0014   | 2.85345 | 0.43385125 | 0.758008253 | -0.324 |
| cg17540545 | I  | 37 | 19 | 35630355  | FXD1;FXD1         | 0.58 | 0.00041  | 3.39184 | 0.34828476 | 0.672209023 | -0.324 |
| cg06005892 | II | 37 | 11 | 3177622   | OSBPL5;OSBPL5;OS  | 0.58 | 0.00041  | 3.39184 | 0.41567238 | 0.73883645  | -0.323 |
| cg01697902 | II | 37 | 14 | 25046117  | CTSG              | 0.5  | 0.00432  | 2.36443 | 0.50906398 | 0.831825    | -0.323 |
| cg16378063 | II | 37 | 17 | 47329552  |                   | 0.58 | 0.00041  | 3.39184 | 0.46164684 | 0.784185138 | -0.323 |
| cg02862467 | II | 37 | 1  | 19407897  | UBR4              | 0.54 | 0.0014   | 2.85345 | 0.48269746 | 0.80490255  | -0.322 |
| cg17078393 | II | 37 | 1  | 32717002  | LCK               | 0.54 | 0.0014   | 2.85345 | 0.6759174  | 0.353543394 | 0.322  |
| cg06748146 | II | 37 | 10 | 71104724  | HK1;HK1;HK1;HK1;I | 0.54 | 0.0014   | 2.85345 | 0.51806672 | 0.196360468 | 0.322  |
| cg10718809 | II | 37 | 11 | 64087106  | PRDX5;PRDX5;PRD)  | 0.62 | 0.0001   | 3.98291 | 0.38205041 | 0.703624022 | -0.322 |
| cg16085171 | II | 37 | 12 | 123569118 | PITPNM2           | 0.46 | 0.01197  | 1.92207 | 0.73550835 | 0.413582667 | 0.322  |
| cg02659854 | II | 37 | 13 | 24824078  | SPATA13;SPATA13   | 0.54 | 0.0014   | 2.85345 | 0.45667386 | 0.778921242 | -0.322 |
| cg14742445 | II | 37 | 22 | 30195299  | ASCC2             | 0.58 | 0.00041  | 3.39184 | 0.42585025 | 0.747352134 | -0.322 |
| cg03321813 | II | 37 | 4  | 84257153  | HPSE;HPSE;HPSE    | 0.54 | 0.0014   | 2.85345 | 0.3363846  | 0.657859443 | -0.321 |
| cg06657721 | I  | 37 | 6  | 25027618  |                   | 0.67 | 2.34E-05 | 4.63072 | 0.47677723 | 0.155750094 | 0.321  |
| cg03155200 | I  | 37 | 11 | 2833259   | KCNQ1;KCNQ1       | 0.5  | 0.00432  | 2.36443 | 0.55334011 | 0.873956574 | -0.321 |
| cg00974864 | II | 37 | 1  | 161601053 | FCGR3B;FCGR3B     | 0.54 | 0.0014   | 2.85345 | 0.40942335 | 0.729672893 | -0.32  |
| cg17660833 | II | 37 | 3  | 11267020  | HRH1;HRH1;HRH1    | 0.62 | 0.0001   | 3.98291 | 0.51793357 | 0.837446145 | -0.32  |
| cg21519701 | II | 37 | 17 | 62252524  | TEX2              | 0.54 | 0.0014   | 2.85345 | 0.50552885 | 0.82514458  | -0.32  |
| cg25059899 | II | 37 | 18 | 60904328  | BCL2              | 0.67 | 2.34E-05 | 4.63072 | 0.5539513  | 0.874160444 | -0.32  |
| cg17356733 | II | 37 | 21 | 34774627  | IFNGR2            | 0.67 | 2.34E-05 | 4.63072 | 0.55231673 | 0.872730835 | -0.32  |
| cg14138540 | I  | 37 | 15 | 93571988  |                   | 0.54 | 0.0014   | 2.85345 | 0.38913523 | 0.708160039 | -0.319 |
| cg20609803 | II | 37 | 1  | 161184305 | FCER1G            | 0.58 | 0.00041  | 3.39184 | 0.49343614 | 0.811149017 | -0.318 |
| cg19701828 | II | 37 | 2  | 219235515 |                   | 0.58 | 0.00041  | 3.39184 | 0.37274535 | 0.690620835 | -0.318 |
| cg25856090 | II | 37 | 7  | 143028708 | CLCN1             | 0.58 | 0.00041  | 3.39184 | 0.49631828 | 0.814524897 | -0.318 |
| cg17206393 | II | 37 | 20 | 33681223  | TRPC4AP;TRPC4AP   | 0.54 | 0.0014   | 2.85345 | 0.48639227 | 0.804764644 | -0.318 |
| cg13086983 | II | 37 | 1  | 21664810  | ECE1              | 0.58 | 0.00041  | 3.39184 | 0.42981057 | 0.747050216 | -0.317 |
| cg06430688 | II | 37 | 2  | 242490217 |                   | 0.46 | 0.01197  | 1.92207 | 0.74437874 | 0.427302336 | 0.317  |
| cg08373904 | I  | 37 | 11 | 1543275   | HCCA2             | 0.58 | 0.00041  | 3.39184 | 0.62702635 | 0.309539355 | 0.317  |
| cg23681017 | I  | 37 | 4  | 681086    | MFSD7             | 0.62 | 0.0001   | 3.98291 | 0.53677871 | 0.853168321 | -0.316 |
| cg25913761 | I  | 37 | 15 | 90727560  | SEMA4B            | 0.62 | 0.0001   | 3.98291 | 0.56155439 | 0.245694334 | 0.316  |
| cg12019801 | II | 37 | 18 | 74114708  | ZNF516            | 0.62 | 0.0001   | 3.98291 | 0.47466446 | 0.790187761 | -0.316 |
| cg22381248 | II | 37 | 1  | 42003713  | HIVEP3;HIVEP3     | 0.58 | 0.00041  | 3.39184 | 0.58816273 | 0.272959196 | 0.315  |
| cg05057534 | II | 37 | 2  | 28497669  | BRE;BRE;BRE;BRE;B | 0.58 | 0.00041  | 3.39184 | 0.46963673 | 0.784402525 | -0.315 |

|            |    |    |    |                             |      |          |         |            |             |        |
|------------|----|----|----|-----------------------------|------|----------|---------|------------|-------------|--------|
| cg13709496 | II | 37 | 9  | 101011718 TBC1D2            | 0.58 | 0.00041  | 3.39184 | 0.41591292 | 0.730656539 | -0.315 |
| cg13179472 | I  | 37 | 11 | 11177888                    | 0.54 | 0.0014   | 2.85345 | 0.59792533 | 0.282740273 | 0.315  |
| cg21638533 | II | 37 | 12 | 6658625 IFFO1;IFFO1;IFFO1   | 0.58 | 0.00041  | 3.39184 | 0.46701737 | 0.782362348 | -0.315 |
| cg08183317 | II | 37 | 13 | 114261934 TFDP1;TFDP1       | 0.54 | 0.0014   | 2.85345 | 0.40040204 | 0.715626682 | -0.315 |
| cg07110356 | I  | 37 | 17 | 56355431 MPO                | 0.62 | 0.0001   | 3.98291 | 0.57769089 | 0.892609989 | -0.315 |
| cg02156723 | II | 37 | 1  | 12100631                    | 0.54 | 0.0014   | 2.85345 | 0.56402592 | 0.249527946 | 0.314  |
| cg07377178 | II | 37 | 6  | 3025064                     | 0.62 | 0.0001   | 3.98291 | 0.39970719 | 0.712811036 | -0.313 |
| cg25888881 | II | 37 | 10 | 31288287 ZNF438;ZNF438;ZN   | 0.62 | 0.0001   | 3.98291 | 0.48589914 | 0.79846296  | -0.313 |
| cg04046364 | II | 37 | 12 | 58210661 AVIL               | 0.58 | 0.00041  | 3.39184 | 0.44741181 | 0.760556875 | -0.313 |
| cg04831327 | II | 37 | 12 | 114299076 RBM19;RBM19;RBM   | 0.58 | 0.00041  | 3.39184 | 0.52333552 | 0.835933253 | -0.313 |
| cg26847100 | II | 37 | 19 | 10748778 SLC44A2;SLC44A2    | 0.54 | 0.0014   | 2.85345 | 0.43107448 | 0.744144252 | -0.313 |
| cg08173915 | II | 37 | 21 | 34774164 IFNGR2             | 0.67 | 2.34E-05 | 4.63072 | 0.53435388 | 0.846891515 | -0.313 |
| cg18148314 | II | 37 | 1  | 6425319 ACOT7;ACOT7         | 0.54 | 0.0014   | 2.85345 | 0.64588016 | 0.33389286  | 0.312  |
| cg25521400 | II | 37 | 2  | 62445279 B3GNT2             | 0.54 | 0.0014   | 2.85345 | 0.47977724 | 0.791406047 | -0.312 |
| cg02012974 | II | 37 | 3  | 66492992 LRIG1              | 0.58 | 0.00041  | 3.39184 | 0.47874274 | 0.790910138 | -0.312 |
| cg18915856 | II | 37 | 14 | 21483641                    | 0.54 | 0.0014   | 2.85345 | 0.45906184 | 0.770731719 | -0.312 |
| cg00760938 | II | 37 | 2  | 217357159                   | 0.46 | 0.01197  | 1.92207 | 0.63260889 | 0.321135425 | 0.311  |
| cg25087423 | II | 37 | 11 | 118754535 CXCR5             | 0.46 | 0.01197  | 1.92207 | 0.70553428 | 0.394073035 | 0.311  |
| cg07488141 | II | 37 | 7  | 47560215 TNS3               | 0.54 | 0.0014   | 2.85345 | 0.48744603 | 0.797637912 | -0.31  |
| cg13999433 | II | 37 | 9  | 117156883 AKNA              | 0.67 | 2.34E-05 | 4.63072 | 0.50012602 | 0.810170624 | -0.31  |
| cg16148346 | II | 37 | 11 | 58826475                    | 0.5  | 0.00432  | 2.36443 | 0.679063   | 0.368599047 | 0.31   |
| cg07618110 | II | 37 | 11 | 60225240 MS4A1;MS4A1        | 0.46 | 0.01197  | 1.92207 | 0.65302275 | 0.34282721  | 0.31   |
| cg11077171 | I  | 37 | 15 | 74881051 ARID3B             | 0.58 | 0.00041  | 3.39184 | 0.53563933 | 0.845769712 | -0.31  |
| cg03689552 | II | 37 | 16 | 3292971 MEFV                | 0.5  | 0.00432  | 2.36443 | 0.46244086 | 0.772176706 | -0.31  |
| cg01869896 | II | 37 | 1  | 40420299 MFSD2A;MFSD2A      | 0.54 | 0.0014   | 2.85345 | 0.43707708 | 0.746536499 | -0.309 |
| cg27230882 | II | 37 | 1  | 110976749                   | 0.58 | 0.00041  | 3.39184 | 0.48683777 | 0.795845366 | -0.309 |
| cg16875057 | II | 37 | 2  | 169006003 STK39             | 0.62 | 0.0001   | 3.98291 | 0.50573305 | 0.814435697 | -0.309 |
| cg14266770 | II | 37 | 9  | 136721183 VAV2;VAV2         | 0.54 | 0.0014   | 2.85345 | 0.49491561 | 0.803604463 | -0.309 |
| cg23595304 | II | 37 | 11 | 46879516 LRP4               | 0.58 | 0.00041  | 3.39184 | 0.44061598 | 0.749873944 | -0.309 |
| cg16728539 | II | 37 | 12 | 2451169 CACNA1C;CACNA1C     | 0.54 | 0.0014   | 2.85345 | 0.46937612 | 0.778622091 | -0.309 |
| cg18004847 | II | 37 | 19 | 1155056 SBNO2               | 0.58 | 0.00041  | 3.39184 | 0.4284446  | 0.737603683 | -0.309 |
| cg12156512 | I  | 37 | 19 | 47258676 FKRP;FKRP          | 0.54 | 0.0014   | 2.85345 | 0.58753512 | 0.896764159 | -0.309 |
| cg08933467 | II | 37 | 1  | 157776690 FCRL1;FCRL1;FCRL1 | 0.5  | 0.00432  | 2.36443 | 0.52259816 | 0.214373988 | 0.308  |

|            |    |    |    |                              |      |          |         |            |             |        |
|------------|----|----|----|------------------------------|------|----------|---------|------------|-------------|--------|
| cg26313511 | II | 37 | 3  | 125053815 ZNF148             | 0.54 | 0.0014   | 2.85345 | 0.54426063 | 0.851853936 | -0.308 |
| cg19869035 | II | 37 | 7  | 2653955 IQCE;IQCE            | 0.58 | 0.00041  | 3.39184 | 0.48535794 | 0.792940993 | -0.308 |
| cg26284388 | II | 37 | 10 | 126289835 LHPP;LHPP          | 0.46 | 0.01197  | 1.92207 | 0.68950825 | 0.381408048 | 0.308  |
| cg09233619 | II | 37 | 11 | 23421870                     | 0.42 | 0.02991  | 1.52413 | 0.54933369 | 0.857204206 | -0.308 |
| cg17161520 | II | 37 | 11 | 67174843 TBC1D10C            | 0.54 | 0.0014   | 2.85345 | 0.48282778 | 0.174474592 | 0.308  |
| cg05928849 | II | 37 | 11 | 122993208 ASAM               | 0.58 | 0.00041  | 3.39184 | 0.53615051 | 0.844210702 | -0.308 |
| cg24804768 | II | 37 | 12 | 754911 NINJ2                 | 0.62 | 0.0001   | 3.98291 | 0.48612854 | 0.793727954 | -0.308 |
| cg15464148 | II | 37 | 12 | 6745057 LPAR5                | 0.5  | 0.00432  | 2.36443 | 0.64868873 | 0.340399437 | 0.308  |
| cg21052932 | II | 37 | 14 | 51342320 ABHD12B;ABHD12E     | 0.54 | 0.0014   | 2.85345 | 0.44623962 | 0.138080885 | 0.308  |
| cg05977333 | II | 37 | 16 | 86029348                     | 0.46 | 0.01197  | 1.92207 | 0.72945669 | 0.421149842 | 0.308  |
| cg12459502 | II | 37 | 18 | 60904237 BCL2                | 0.62 | 0.0001   | 3.98291 | 0.40554487 | 0.713211587 | -0.308 |
| cg26930596 | II | 37 | 1  | 2082315 PRKCZ;PRKCZ;PRKC     | 0.58 | 0.00041  | 3.39184 | 0.53233978 | 0.839361359 | -0.307 |
| cg11283860 | II | 37 | 1  | 8273352                      | 0.58 | 0.00041  | 3.39184 | 0.47571148 | 0.782567171 | -0.307 |
| cg08864105 | I  | 37 | 1  | 111743020 DENND2D            | 0.42 | 0.02991  | 1.52413 | 0.29186911 | 0.598702692 | -0.307 |
| cg26552743 | II | 37 | 11 | 58826414                     | 0.54 | 0.0014   | 2.85345 | 0.65147666 | 0.343997975 | 0.307  |
| cg11362935 | I  | 37 | 11 | 111250201 POU2AF1            | 0.62 | 0.0001   | 3.98291 | 0.44600406 | 0.138725802 | 0.307  |
| cg10264529 | II | 37 | 14 | 24562064 PCK2;PCK2           | 0.62 | 0.0001   | 3.98291 | 0.51165704 | 0.819091821 | -0.307 |
| cg07597976 | II | 37 | 16 | 28943019 CD19                | 0.58 | 0.00041  | 3.39184 | 0.54798842 | 0.240517523 | 0.307  |
| cg14131824 | II | 37 | 17 | 1490487 SLC43A2              | 0.67 | 2.34E-05 | 4.63072 | 0.43886331 | 0.745455145 | -0.307 |
| cg12339328 | II | 37 | 20 | 18491484 SEC23B;SEC23B;SEC   | 0.58 | 0.00041  | 3.39184 | 0.57025872 | 0.877153832 | -0.307 |
| cg23036852 | II | 37 | 21 | 44809983                     | 0.54 | 0.0014   | 2.85345 | 0.35600973 | 0.662796048 | -0.307 |
| cg24492202 | I  | 37 | 4  | 2802612 SH3BP2               | 0.62 | 0.0001   | 3.98291 | 0.52123946 | 0.827195348 | -0.306 |
| cg10454879 | I  | 37 | 8  | 602158                       | 0.58 | 0.00041  | 3.39184 | 0.60785857 | 0.913742586 | -0.306 |
| cg13554018 | II | 37 | 9  | 91091556 SPIN1               | 0.54 | 0.0014   | 2.85345 | 0.53270295 | 0.226965123 | 0.306  |
| cg10045881 | II | 37 | 1  | 111770291 CHI3L2;CHI3L2;CHI3 | 0.62 | 0.0001   | 3.98291 | 0.46517937 | 0.770361183 | -0.305 |
| cg23230830 | II | 37 | 1  | 248903100 LOC646627          | 0.58 | 0.00041  | 3.39184 | 0.4326217  | 0.737526636 | -0.305 |
| cg04346861 | II | 37 | 2  | 240291097 HDAC4              | 0.5  | 0.00432  | 2.36443 | 0.71544371 | 0.410914126 | 0.305  |
| cg10725937 | II | 37 | 6  | 41130978 TREM2               | 0.62 | 0.0001   | 3.98291 | 0.47226094 | 0.776851864 | -0.305 |
| cg18275732 | I  | 37 | 6  | 170365320                    | 0.5  | 0.00432  | 2.36443 | 0.54549249 | 0.85011875  | -0.305 |
| cg19882315 | II | 37 | 8  | 11351846 BLK;BLK             | 0.46 | 0.01197  | 1.92207 | 0.61723969 | 0.311974941 | 0.305  |
| cg11940526 | II | 37 | 10 | 80311367                     | 0.54 | 0.0014   | 2.85345 | 0.60498819 | 0.299840566 | 0.305  |
| cg00554993 | II | 37 | 14 | 23588616 CEBPE               | 0.58 | 0.00041  | 3.39184 | 0.40028758 | 0.70493153  | -0.305 |
| cg11589536 | II | 37 | 3  | 46250518 CCR1                | 0.71 | 4.57E-06 | 5.34042 | 0.53567256 | 0.839585462 | -0.304 |

|            |    |    |    |           |                   |      |          |         |            |             |        |
|------------|----|----|----|-----------|-------------------|------|----------|---------|------------|-------------|--------|
| cg26002008 | II | 37 | 5  | 1477719   | LPCAT1            | 0.58 | 0.00041  | 3.39184 | 0.37270772 | 0.677053218 | -0.304 |
| cg23939096 | II | 37 | 5  | 1555791   |                   | 0.54 | 0.0014   | 2.85345 | 0.44869719 | 0.753175052 | -0.304 |
| cg09378756 | II | 37 | 14 | 24569543  | PCK2;PCK2         | 0.58 | 0.00041  | 3.39184 | 0.34562541 | 0.649423215 | -0.304 |
| cg07069934 | II | 37 | 15 | 89192956  | ISG20             | 0.62 | 0.0001   | 3.98291 | 0.52502278 | 0.221449112 | 0.304  |
| cg16624482 | I  | 37 | 21 | 43548126  | UMODL1;UMODL1     | 0.58 | 0.00041  | 3.39184 | 0.59630799 | 0.899906598 | -0.304 |
| cg22013055 | II | 37 | 2  | 47054833  | LOC100134259      | 0.5  | 0.00432  | 2.36443 | 0.60232918 | 0.298908483 | 0.303  |
| cg18556976 | II | 37 | 3  | 14320523  |                   | 0.54 | 0.0014   | 2.85345 | 0.48418088 | 0.786770186 | -0.303 |
| cg18599081 | II | 37 | 3  | 46448084  | CCRL2;CCRL2       | 0.54 | 0.0014   | 2.85345 | 0.45378762 | 0.757014566 | -0.303 |
| cg13815684 | I  | 37 | 6  | 31540440  | LTA;LTA           | 0.62 | 0.0001   | 3.98291 | 0.7254413  | 0.422580722 | 0.303  |
| cg21234082 | II | 37 | 9  | 124363848 | DAB2IP            | 0.58 | 0.00041  | 3.39184 | 0.36210918 | 0.665397144 | -0.303 |
| cg07692929 | II | 37 | 11 | 7517263   | OLFML1            | 0.5  | 0.00432  | 2.36443 | 0.5906738  | 0.287644228 | 0.303  |
| cg08900384 | II | 37 | 11 | 72546168  |                   | 0.58 | 0.00041  | 3.39184 | 0.40790501 | 0.710498653 | -0.303 |
| cg07248377 | II | 37 | 16 | 4732406   | MGRN1;MGRN1;MGRN1 | 0.58 | 0.00041  | 3.39184 | 0.42757044 | 0.730802792 | -0.303 |
| cg15134583 | II | 37 | 1  | 224015075 | TP53BP2;TP53BP2   | 0.54 | 0.0014   | 2.85345 | 0.43739467 | 0.738962074 | -0.302 |
| cg21190228 | II | 37 | 2  | 240132342 | HDAC4             | 0.58 | 0.00041  | 3.39184 | 0.50910218 | 0.810911671 | -0.302 |
| cg25853622 | II | 37 | 3  | 188425256 | LPP;LPP;LPP       | 0.54 | 0.0014   | 2.85345 | 0.53215373 | 0.834344231 | -0.302 |
| cg11586857 | I  | 37 | 6  | 31540136  | LTA;LTA;LTA       | 0.62 | 0.0001   | 3.98291 | 0.75046228 | 0.448607399 | 0.302  |
| cg01268901 | II | 37 | 12 | 1744957   | WNT5B;WNT5B       | 0.58 | 0.00041  | 3.39184 | 0.4668041  | 0.769119976 | -0.302 |
| cg07272654 | I  | 37 | 16 | 86011988  |                   | 0.62 | 0.0001   | 3.98291 | 0.36053868 | 0.662227012 | -0.302 |
| cg07721872 | I  | 37 | 16 | 87735256  | LOC100129637      | 0.58 | 0.00041  | 3.39184 | 0.69221695 | 0.389846799 | 0.302  |
| cg12323063 | II | 37 | 17 | 67497879  | MAP2K6            | 0.62 | 0.0001   | 3.98291 | 0.55638801 | 0.858228682 | -0.302 |
| cg16356013 | II | 37 | 5  | 134722079 | H2AFY;H2AFY;H2AFY | 0.67 | 2.34E-05 | 4.63072 | 0.55876542 | 0.860034321 | -0.301 |
| cg21882356 | II | 37 | 14 | 21153451  | ANG;RNASE4        | 0.58 | 0.00041  | 3.39184 | 0.54568386 | 0.846415403 | -0.301 |
| cg27391816 | I  | 37 | 1  | 1672644   | SLC35E2           | 0.58 | 0.00041  | 3.39184 | 0.61213803 | 0.912518854 | -0.3   |
| cg27485921 | II | 37 | 2  | 46747379  | ATP6V1E2          | 0.58 | 0.00041  | 3.39184 | 0.48988433 | 0.7903507   | -0.3   |
| cg02244028 | II | 37 | 3  | 38992200  | SCN11A            | 0.62 | 0.0001   | 3.98291 | 0.55287889 | 0.852687249 | -0.3   |
| cg03143046 | II | 37 | 6  | 43758007  |                   | 0.54 | 0.0014   | 2.85345 | 0.49425165 | 0.794203803 | -0.3   |
| cg11723077 | II | 37 | 6  | 158508188 | SYNJ2             | 0.54 | 0.0014   | 2.85345 | 0.40964566 | 0.709750555 | -0.3   |
| cg11067407 | II | 37 | 11 | 113599852 |                   | 0.62 | 0.0001   | 3.98291 | 0.43561716 | 0.735678549 | -0.3   |
| cg23575688 | II | 37 | 11 | 119486443 |                   | 0.58 | 0.00041  | 3.39184 | 0.42028147 | 0.72072064  | -0.3   |
| cg06107293 | I  | 37 | 15 | 22915986  | CYFIP1            | 0.5  | 0.00432  | 2.36443 | 0.48716657 | 0.787030683 | -0.3   |
| cg14579184 | II | 37 | 17 | 80873365  | TBCD              | 0.5  | 0.00432  | 2.36443 | 0.6097846  | 0.309740714 | 0.3    |
| cg14575739 | II | 37 | 19 | 55098069  | LILRA2;LILRA2     | 0.46 | 0.01197  | 1.92207 | 0.58775456 | 0.287535264 | 0.3    |

|            |    |    |    |                            |      |          |         |            |             |        |
|------------|----|----|----|----------------------------|------|----------|---------|------------|-------------|--------|
| cg19157819 | II | 37 | 10 | 75405260 SYNPO2L;SYNPO2L   | 0.62 | 0.0001   | 3.98291 | 0.44426756 | 0.743647978 | -0.299 |
| cg01849093 | II | 37 | 11 | 110876141                  | 0.62 | 0.0001   | 3.98291 | 0.67251041 | 0.373195832 | 0.299  |
| cg26776551 | II | 37 | 13 | 51944507 INTS6;INTS6       | 0.62 | 0.0001   | 3.98291 | 0.47363017 | 0.772277477 | -0.299 |
| cg06208288 | I  | 37 | 1  | 58858074                   | 0.71 | 4.57E-06 | 5.34042 | 0.67647606 | 0.378607077 | 0.298  |
| cg24641737 | II | 37 | 1  | 111743271 DENND2D;DENND2   | 0.46 | 0.01197  | 1.92207 | 0.31661302 | 0.614438441 | -0.298 |
| cg10972897 | II | 37 | 1  | 165859714 UCK2             | 0.54 | 0.0014   | 2.85345 | 0.5129688  | 0.810528181 | -0.298 |
| cg02319829 | II | 37 | 3  | 169649593 SAMD7            | 0.5  | 0.00432  | 2.36443 | 0.64802146 | 0.349980602 | 0.298  |
| cg09740468 | II | 37 | 6  | 3025325                    | 0.58 | 0.00041  | 3.39184 | 0.44300162 | 0.741242134 | -0.298 |
| cg13400493 | II | 37 | 7  | 44826786                   | 0.42 | 0.02991  | 1.52413 | 0.67610223 | 0.377933399 | 0.298  |
| cg06072036 | II | 37 | 11 | 822402 PNPLA2              | 0.54 | 0.0014   | 2.85345 | 0.43938515 | 0.73692584  | -0.298 |
| cg20357538 | I  | 37 | 15 | 101777761 CHSY1            | 0.54 | 0.0014   | 2.85345 | 0.36570626 | 0.664063716 | -0.298 |
| cg05599723 | II | 37 | 1  | 12241073 TNFRSF1B          | 0.58 | 0.00041  | 3.39184 | 0.48420427 | 0.781213929 | -0.297 |
| cg13430807 | II | 37 | 1  | 149903315 MTMR11;MTMR11    | 0.58 | 0.00041  | 3.39184 | 0.50687173 | 0.803789357 | -0.297 |
| cg05954120 | II | 37 | 1  | 156254757 TMEM79;TMEM79    | 0.54 | 0.0014   | 2.85345 | 0.45782409 | 0.755235309 | -0.297 |
| cg01584932 | II | 37 | 2  | 74708767 TTC31;TTC31;CCDC  | 0.67 | 2.34E-05 | 4.63072 | 0.43344511 | 0.730169325 | -0.297 |
| cg08944026 | II | 37 | 5  | 10626811 ANKRD33B          | 0.54 | 0.0014   | 2.85345 | 0.38319689 | 0.680139595 | -0.297 |
| cg14763104 | II | 37 | 11 | 2406384 CD81               | 0.5  | 0.00432  | 2.36443 | 0.48421961 | 0.186732859 | 0.297  |
| cg27405128 | II | 37 | 15 | 58540402                   | 0.62 | 0.0001   | 3.98291 | 0.52623508 | 0.822777049 | -0.297 |
| cg16270399 | I  | 37 | 18 | 74257894 LOC284276         | 0.5  | 0.00432  | 2.36443 | 0.5418442  | 0.838511121 | -0.297 |
| cg12126686 | II | 37 | 19 | 35821634 CD22              | 0.46 | 0.01197  | 1.92207 | 0.61482035 | 0.317852581 | 0.297  |
| cg18590995 | II | 37 | 1  | 226558496 PARP1            | 0.54 | 0.0014   | 2.85345 | 0.60044982 | 0.304849326 | 0.296  |
| cg02505099 | II | 37 | 3  | 122718411 SEMA5B           | 0.42 | 0.02991  | 1.52413 | 0.61518815 | 0.318764247 | 0.296  |
| cg23934477 | II | 37 | 5  | 149741030 TCOF1;TCOF1;TCOF | 0.54 | 0.0014   | 2.85345 | 0.71565995 | 0.419796866 | 0.296  |
| cg10271819 | II | 37 | 7  | 139426030 HIPK2;HIPK2      | 0.58 | 0.00041  | 3.39184 | 0.3977886  | 0.694238885 | -0.296 |
| cg08454687 | I  | 37 | 7  | 157091435                  | 0.58 | 0.00041  | 3.39184 | 0.46812488 | 0.764365064 | -0.296 |
| cg26661623 | II | 37 | 17 | 7019262 ASGR2;ASGR2;ASGI   | 0.5  | 0.00432  | 2.36443 | 0.49175617 | 0.788218514 | -0.296 |
| cg21341487 | II | 37 | 20 | 60760919 GTPBP5            | 0.67 | 2.34E-05 | 4.63072 | 0.56548127 | 0.861035521 | -0.296 |
| cg24575128 | II | 37 | 3  | 52502445 NISCH             | 0.58 | 0.00041  | 3.39184 | 0.44886818 | 0.743681605 | -0.295 |
| cg25709790 | II | 37 | 7  | 24742552 DFNA5;DFNA5;DFN   | 0.42 | 0.02991  | 1.52413 | 0.5562601  | 0.851473818 | -0.295 |
| cg14480046 | I  | 37 | 12 | 122444580                  | 0.67 | 2.34E-05 | 4.63072 | 0.60913264 | 0.314343117 | 0.295  |
| cg12940993 | II | 37 | 14 | 21271148 RNASE1;RNASE1;RN  | 0.54 | 0.0014   | 2.85345 | 0.43966874 | 0.734659863 | -0.295 |
| cg11465404 | II | 37 | 15 | 22550643                   | 0.58 | 0.00041  | 3.39184 | 0.42870282 | 0.723725621 | -0.295 |
| cg08493063 | II | 37 | 16 | 11330934                   | 0.54 | 0.0014   | 2.85345 | 0.45398481 | 0.749367246 | -0.295 |

|            |    |    |    |                               |      |          |         |            |             |        |
|------------|----|----|----|-------------------------------|------|----------|---------|------------|-------------|--------|
| cg08045301 | II | 37 | 16 | 71887487 ATXN1L;ATXN1L        | 0.5  | 0.00432  | 2.36443 | 0.50007278 | 0.204990603 | 0.295  |
| cg22968622 | I  | 37 | 17 | 43663579                      | 0.46 | 0.01197  | 1.92207 | 0.32996119 | 0.035294996 | 0.295  |
| cg11151395 | I  | 37 | 17 | 56355299 MPO                  | 0.58 | 0.00041  | 3.39184 | 0.61697147 | 0.912271187 | -0.295 |
| cg21221263 | II | 37 | 2  | 134933179                     | 0.58 | 0.00041  | 3.39184 | 0.46648587 | 0.7604808   | -0.294 |
| cg18918831 | II | 37 | 3  | 195489782 MUC4;MUC4;MUC4      | 0.58 | 0.00041  | 3.39184 | 0.48023193 | 0.774300785 | -0.294 |
| cg14284211 | II | 37 | 6  | 35570224 FKBP5;FKBP5;FKBP5    | 0.46 | 0.01197  | 1.92207 | 0.35884254 | 0.653081931 | -0.294 |
| cg01612883 | II | 37 | 12 | 125023115                     | 0.62 | 0.0001   | 3.98291 | 0.39367867 | 0.687770061 | -0.294 |
| cg02999224 | II | 37 | 14 | 23284559 SLC7A7;SLC7A7;SLC7A7 | 0.58 | 0.00041  | 3.39184 | 0.40331178 | 0.697073779 | -0.294 |
| cg26326621 | I  | 37 | 14 | 77332983 C14orf166B           | 0.54 | 0.0014   | 2.85345 | 0.49891745 | 0.793009903 | -0.294 |
| cg06823060 | II | 37 | 16 | 81616874 CMIP;CMIP            | 0.58 | 0.00041  | 3.39184 | 0.59032106 | 0.884369444 | -0.294 |
| cg04592811 | II | 37 | 17 | 16200581 PIGL                 | 0.62 | 0.0001   | 3.98291 | 0.54355339 | 0.837507179 | -0.294 |
| cg17837191 | II | 37 | 17 | 62318673 TEX2                 | 0.62 | 0.0001   | 3.98291 | 0.51356655 | 0.807621096 | -0.294 |
| cg05350607 | II | 37 | 1  | 151777000 LINGO4              | 0.5  | 0.00432  | 2.36443 | 0.51873275 | 0.22541921  | 0.293  |
| cg20941184 | II | 37 | 1  | 209878178 HSD11B1;HSD11B1     | 0.58 | 0.00041  | 3.39184 | 0.4576274  | 0.750276454 | -0.293 |
| cg14397918 | II | 37 | 9  | 72078829 APBA1                | 0.54 | 0.0014   | 2.85345 | 0.51723926 | 0.810528033 | -0.293 |
| cg23867673 | II | 37 | 10 | 73404170 CDH23;CDH23          | 0.54 | 0.0014   | 2.85345 | 0.59343622 | 0.300796235 | 0.293  |
| cg08867471 | II | 37 | 5  | 56738244                      | 0.5  | 0.00432  | 2.36443 | 0.63694859 | 0.344928659 | 0.292  |
| cg19480385 | II | 37 | 7  | 47078738                      | 0.5  | 0.00432  | 2.36443 | 0.54844623 | 0.256712315 | 0.292  |
| cg17099048 | II | 37 | 8  | 139734443 COL22A1             | 0.54 | 0.0014   | 2.85345 | 0.57105702 | 0.279082361 | 0.292  |
| cg26443127 | II | 37 | 10 | 31987230                      | 0.54 | 0.0014   | 2.85345 | 0.46792892 | 0.759577945 | -0.292 |
| cg26434370 | II | 37 | 16 | 10909361 FAM18A               | 0.58 | 0.00041  | 3.39184 | 0.52410142 | 0.815727084 | -0.292 |
| cg03448915 | I  | 37 | 16 | 66583078 TK2                  | 0.58 | 0.00041  | 3.39184 | 0.5980072  | 0.30564701  | 0.292  |
| cg22911650 | II | 37 | 19 | 51645423 SIGLEC7;SIGLEC7      | 0.5  | 0.00432  | 2.36443 | 0.48496526 | 0.77724479  | -0.292 |
| cg25198049 | I  | 37 | 1  | 151509723 CGN                 | 0.58 | 0.00041  | 3.39184 | 0.43781673 | 0.728616792 | -0.291 |
| cg15607142 | II | 37 | 3  | 128420513                     | 0.58 | 0.00041  | 3.39184 | 0.39998873 | 0.690715322 | -0.291 |
| cg04533116 | II | 37 | 5  | 1169063                       | 0.54 | 0.0014   | 2.85345 | 0.40308828 | 0.694226804 | -0.291 |
| cg18888137 | II | 37 | 6  | 32945759 BRD2;BRD2            | 0.62 | 0.0001   | 3.98291 | 0.54178618 | 0.832433837 | -0.291 |
| cg03179542 | II | 37 | 7  | 2647333 IQCE;IQCE             | 0.62 | 0.0001   | 3.98291 | 0.42825245 | 0.718881346 | -0.291 |
| cg03622263 | II | 37 | 9  | 126101308                     | 0.54 | 0.0014   | 2.85345 | 0.47618422 | 0.184828934 | 0.291  |
| cg13549277 | II | 37 | 12 | 6659520 IFFO1;IFFO1;IFFO1     | 0.71 | 4.57E-06 | 5.34042 | 0.44898773 | 0.740302975 | -0.291 |
| cg26783127 | II | 37 | 17 | 79128918 AATK                 | 0.62 | 0.0001   | 3.98291 | 0.56485322 | 0.85568429  | -0.291 |
| cg18659081 | II | 37 | 22 | 44588350 PARVG;PARVG;PARVG    | 0.54 | 0.0014   | 2.85345 | 0.44556067 | 0.736085926 | -0.291 |
| cg17254229 | II | 37 | 2  | 121336713                     | 0.46 | 0.01197  | 1.92207 | 0.58482204 | 0.294440529 | 0.29   |

|            |    |    |    |           |                   |      |          |         |            |             |        |
|------------|----|----|----|-----------|-------------------|------|----------|---------|------------|-------------|--------|
| cg09866565 | II | 37 | 3  | 137844436 | A4GNT             | 0.58 | 0.00041  | 3.39184 | 0.43625158 | 0.725756791 | -0.29  |
| cg01618151 | II | 37 | 6  | 35707957  | C6orf81           | 0.62 | 0.0001   | 3.98291 | 0.50014329 | 0.790182204 | -0.29  |
| cg19396666 | II | 37 | 10 | 125866280 |                   | 0.54 | 0.0014   | 2.85345 | 0.54151761 | 0.251239812 | 0.29   |
| cg24126698 | II | 37 | 13 | 114839662 | RASA3             | 0.67 | 2.34E-05 | 4.63072 | 0.4687669  | 0.758515626 | -0.29  |
| cg27565966 | II | 37 | 16 | 28943198  | CD19              | 0.54 | 0.0014   | 2.85345 | 0.68331845 | 0.392914839 | 0.29   |
| cg09712234 | II | 37 | 16 | 30614413  |                   | 0.58 | 0.00041  | 3.39184 | 0.47327404 | 0.763409682 | -0.29  |
| cg18351781 | II | 37 | 19 | 4950888   | UHRF1;UHRF1       | 0.58 | 0.00041  | 3.39184 | 0.48850779 | 0.778754929 | -0.29  |
| cg17435831 | II | 37 | 1  | 2082522   | PRKCZ;PRKCZ;PRKC  | 0.58 | 0.00041  | 3.39184 | 0.40744473 | 0.696829493 | -0.289 |
| cg13443938 | I  | 37 | 1  | 4087214   |                   | 0.58 | 0.00041  | 3.39184 | 0.5590851  | 0.270039271 | 0.289  |
| cg03860768 | II | 37 | 8  | 11351571  | BLK;BLK           | 0.46 | 0.01197  | 1.92207 | 0.56695949 | 0.277798405 | 0.289  |
| cg21243944 | I  | 37 | 9  | 137118148 |                   | 0.54 | 0.0014   | 2.85345 | 0.55851293 | 0.847461257 | -0.289 |
| cg15481493 | II | 37 | 11 | 35133274  |                   | 0.58 | 0.00041  | 3.39184 | 0.5343718  | 0.823384502 | -0.289 |
| cg12136387 | II | 37 | 12 | 116820108 |                   | 0.58 | 0.00041  | 3.39184 | 0.37768085 | 0.66714734  | -0.289 |
| cg09907509 | I  | 37 | 13 | 37248244  | C13orf36;C13orf36 | 0.46 | 0.01197  | 1.92207 | 0.11400792 | 0.403262374 | -0.289 |
| cg23054181 | II | 37 | 15 | 99048945  | FAM169B           | 0.58 | 0.00041  | 3.39184 | 0.55974764 | 0.849160503 | -0.289 |
| cg08703231 | II | 37 | 16 | 8738304   | C16orf68          | 0.62 | 0.0001   | 3.98291 | 0.44630449 | 0.735614138 | -0.289 |
| cg08425760 | II | 37 | 1  | 11795897  | AGTRAP;AGTRAP;A   | 0.58 | 0.00041  | 3.39184 | 0.42330668 | 0.711414706 | -0.288 |
| cg26433561 | I  | 37 | 1  | 110426090 |                   | 0.62 | 0.0001   | 3.98291 | 0.60141665 | 0.889051095 | -0.288 |
| cg09736959 | II | 37 | 6  | 31540114  | LTA;LTA;LTA       | 0.54 | 0.0014   | 2.85345 | 0.62138932 | 0.333375671 | 0.288  |
| cg01142676 | I  | 37 | 11 | 117695591 | FXVD2;FXVD2;FXVD  | 0.46 | 0.01197  | 1.92207 | 0.32100138 | 0.608574617 | -0.288 |
| cg03408945 | I  | 37 | 16 | 8738531   | C16orf68          | 0.54 | 0.0014   | 2.85345 | 0.46516    | 0.753450881 | -0.288 |
| cg06323049 | II | 37 | 16 | 28943094  | CD19              | 0.46 | 0.01197  | 1.92207 | 0.6227683  | 0.334997671 | 0.288  |
| cg02138358 | II | 37 | 17 | 56358318  | MPO               | 0.62 | 0.0001   | 3.98291 | 0.38734018 | 0.675349706 | -0.288 |
| cg19573490 | II | 37 | 17 | 79870317  | PCYT2;SIRT7       | 0.5  | 0.00432  | 2.36443 | 0.45178454 | 0.739541399 | -0.288 |
| cg06578434 | II | 37 | 19 | 1155225   | SBNO2             | 0.58 | 0.00041  | 3.39184 | 0.45702611 | 0.744733068 | -0.288 |
| cg00578614 | II | 37 | 6  | 30070403  |                   | 0.58 | 0.00041  | 3.39184 | 0.43837    | 0.72510648  | -0.287 |
| cg00288598 | I  | 37 | 8  | 141555295 | EIF2C2;EIF2C2     | 0.54 | 0.0014   | 2.85345 | 0.58986208 | 0.876612189 | -0.287 |
| cg08594651 | I  | 37 | 11 | 47415397  |                   | 0.71 | 4.57E-06 | 5.34042 | 0.37526925 | 0.662258578 | -0.287 |
| cg18316498 | I  | 37 | 11 | 111250196 | POU2AF1           | 0.58 | 0.00041  | 3.39184 | 0.44492994 | 0.157831696 | 0.287  |
| cg20055861 | II | 37 | 15 | 68055293  | MAP2K5;MAP2K5     | 0.54 | 0.0014   | 2.85345 | 0.53709657 | 0.250201453 | 0.287  |
| cg04204452 | II | 37 | 17 | 1479213   | SLC43A2           | 0.58 | 0.00041  | 3.39184 | 0.40190815 | 0.689299342 | -0.287 |
| cg04266202 | II | 37 | 17 | 56352895  | MPO               | 0.54 | 0.0014   | 2.85345 | 0.55983381 | 0.847073753 | -0.287 |
| cg02092514 | I  | 37 | 17 | 80873656  | TBCD              | 0.54 | 0.0014   | 2.85345 | 0.79208708 | 0.505451229 | 0.287  |

|            |    |    |    |           |                    |      |          |         |            |             |        |
|------------|----|----|----|-----------|--------------------|------|----------|---------|------------|-------------|--------|
| cg03199996 | II | 37 | 20 | 49211573  | FAM65C             | 0.5  | 0.00432  | 2.36443 | 0.55194268 | 0.265344779 | 0.287  |
| cg03842822 | II | 37 | 5  | 177740106 | COL23A1            | 0.67 | 2.34E-05 | 4.63072 | 0.53131568 | 0.817079733 | -0.286 |
| cg02402436 | I  | 37 | 6  | 31540051  | LTA;LTA;LTA        | 0.71 | 4.57E-06 | 5.34042 | 0.4652239  | 0.179703842 | 0.286  |
| cg00995368 | II | 37 | 6  | 32627885  | HLA-DQB1           | 0.5  | 0.00432  | 2.36443 | 0.57143157 | 0.285116226 | 0.286  |
| cg12182708 | II | 37 | 10 | 99223744  | MMS19              | 0.62 | 0.0001   | 3.98291 | 0.54253923 | 0.828939977 | -0.286 |
| cg24500630 | II | 37 | 11 | 110436181 |                    | 0.62 | 0.0001   | 3.98291 | 0.46572868 | 0.751897903 | -0.286 |
| cg14066207 | I  | 37 | 14 | 73030666  | RGS6               | 0.5  | 0.00432  | 2.36443 | 0.58563328 | 0.299940607 | 0.286  |
| cg06172871 | II | 37 | 16 | 72088244  | HP;HP              | 0.62 | 0.0001   | 3.98291 | 0.43725676 | 0.723098455 | -0.286 |
| cg20875821 | II | 37 | 18 | 61557735  | SERPINB2;SERPINB1  | 0.62 | 0.0001   | 3.98291 | 0.53545756 | 0.82173986  | -0.286 |
| cg20429981 | II | 37 | 1  | 1609972   | CDK11B;CDK11B;CI   | 0.54 | 0.0014   | 2.85345 | 0.50601501 | 0.220541773 | 0.285  |
| cg22694271 | II | 37 | 1  | 109823096 | PSRC1;PSRC1;PSRC1  | 0.58 | 0.00041  | 3.39184 | 0.39351435 | 0.678999332 | -0.285 |
| cg10667895 | II | 37 | 2  | 102577876 |                    | 0.58 | 0.00041  | 3.39184 | 0.43602491 | 0.721109358 | -0.285 |
| cg14306819 | II | 37 | 2  | 128052889 | ERCC3              | 0.62 | 0.0001   | 3.98291 | 0.49613868 | 0.781613865 | -0.285 |
| cg06710259 | II | 37 | 5  | 55775841  |                    | 0.58 | 0.00041  | 3.39184 | 0.53964158 | 0.254663801 | 0.285  |
| cg17333291 | II | 37 | 7  | 1126326   | GPER;C7orf50;C7orf | 0.54 | 0.0014   | 2.85345 | 0.56673421 | 0.281621537 | 0.285  |
| cg18084554 | II | 37 | 19 | 929046    | ARID3A             | 0.62 | 0.0001   | 3.98291 | 0.40336797 | 0.688619493 | -0.285 |
| cg05327789 | I  | 37 | 20 | 61303264  | SLCO4A1            | 0.54 | 0.0014   | 2.85345 | 0.47009722 | 0.754895837 | -0.285 |
| cg06812844 | II | 37 | 21 | 45773782  | TRPM2              | 0.62 | 0.0001   | 3.98291 | 0.36589886 | 0.650846856 | -0.285 |
| cg22337407 | I  | 37 | 1  | 11046185  |                    | 0.46 | 0.01197  | 1.92207 | 0.60854785 | 0.325036358 | 0.284  |
| cg06984156 | II | 37 | 1  | 20929640  | CDA                | 0.62 | 0.0001   | 3.98291 | 0.43829961 | 0.722170234 | -0.284 |
| cg22084410 | II | 37 | 3  | 51987688  |                    | 0.62 | 0.0001   | 3.98291 | 0.40451152 | 0.688301231 | -0.284 |
| cg00488091 | II | 37 | 6  | 144536326 |                    | 0.54 | 0.0014   | 2.85345 | 0.43027652 | 0.713899732 | -0.284 |
| cg06687504 | I  | 37 | 6  | 167263454 | RPS6KA2            | 0.5  | 0.00432  | 2.36443 | 0.55803659 | 0.273603469 | 0.284  |
| cg02088996 | II | 37 | 7  | 41817771  | LOC285954          | 0.46 | 0.01197  | 1.92207 | 0.30276594 | 0.586436087 | -0.284 |
| cg25838060 | II | 37 | 7  | 139932729 |                    | 0.58 | 0.00041  | 3.39184 | 0.7157243  | 0.432215799 | 0.284  |
| cg09255910 | II | 37 | 1  | 221055790 | HLX                | 0.62 | 0.0001   | 3.98291 | 0.45782706 | 0.741165239 | -0.283 |
| cg17386240 | II | 37 | 5  | 135384080 | TGFBI              | 0.42 | 0.02991  | 1.52413 | 0.80079743 | 0.51818044  | 0.283  |
| cg05094429 | II | 37 | 6  | 167536184 | CCR6;CCR6          | 0.54 | 0.0014   | 2.85345 | 0.48706853 | 0.204089944 | 0.283  |
| cg10557578 | II | 37 | 8  | 37758453  | RAB11FIP1;RAB11F   | 0.62 | 0.0001   | 3.98291 | 0.50250103 | 0.785044711 | -0.283 |
| cg01598421 | I  | 37 | 8  | 134132043 | TG                 | 0.54 | 0.0014   | 2.85345 | 0.74664563 | 0.463342501 | 0.283  |
| cg08169020 | I  | 37 | 14 | 69256888  | ZFP36L1            | 0.75 | 7.61E-07 | 6.11857 | 0.53988182 | 0.257353345 | 0.283  |
| cg22175624 | I  | 37 | 17 | 80829261  | TBCD               | 0.54 | 0.0014   | 2.85345 | 0.56522841 | 0.282179148 | 0.283  |
| cg05891759 | II | 37 | 3  | 121711723 | ILDR1              | 0.5  | 0.00432  | 2.36443 | 0.60322078 | 0.321109743 | 0.282  |

|            |    |    |    |                             |      |          |         |            |             |        |
|------------|----|----|----|-----------------------------|------|----------|---------|------------|-------------|--------|
| cg15431659 | I  | 37 | 3  | 194901357 C3orf21           | 0.58 | 0.00041  | 3.39184 | 0.53309903 | 0.815372109 | -0.282 |
| cg09362796 | I  | 37 | 4  | 3204792 HTT                 | 0.71 | 4.57E-06 | 5.34042 | 0.73962188 | 0.457381903 | 0.282  |
| cg25806704 | II | 37 | 4  | 41936863 TMEM33             | 0.67 | 2.34E-05 | 4.63072 | 0.56809369 | 0.849856939 | -0.282 |
| cg14109551 | II | 37 | 6  | 118903047 C6orf204;C6orf204 | 0.54 | 0.0014   | 2.85345 | 0.58641858 | 0.868174639 | -0.282 |
| cg06623899 | I  | 37 | 8  | 142161840 DENND3            | 0.58 | 0.00041  | 3.39184 | 0.63175713 | 0.91409393  | -0.282 |
| cg27210863 | II | 37 | 10 | 82299606 SH2D4B;SH2D4B      | 0.54 | 0.0014   | 2.85345 | 0.532483   | 0.250507932 | 0.282  |
| cg18780288 | II | 37 | 10 | 111659903 XPNPEP1;XPNPEP1;  | 0.5  | 0.00432  | 2.36443 | 0.36631771 | 0.648080525 | -0.282 |
| cg13300301 | II | 37 | 11 | 94279068 FUT4;FUT4          | 0.62 | 0.0001   | 3.98291 | 0.48502122 | 0.7673978   | -0.282 |
| cg01662869 | II | 37 | 16 | 4730410 MGRN1;MGRN1;M       | 0.54 | 0.0014   | 2.85345 | 0.37806139 | 0.659639104 | -0.282 |
| cg12162195 | II | 37 | 21 | 46448092                    | 0.42 | 0.02991  | 1.52413 | 0.80083171 | 0.519190326 | 0.282  |
| cg03471150 | II | 37 | 1  | 201797198 IPO9              | 0.67 | 2.34E-05 | 4.63072 | 0.52064456 | 0.801355189 | -0.281 |
| cg25124300 | II | 37 | 2  | 31607761 XDH                | 0.58 | 0.00041  | 3.39184 | 0.54738952 | 0.828491676 | -0.281 |
| cg12499316 | II | 37 | 2  | 106242236                   | 0.5  | 0.00432  | 2.36443 | 0.56580657 | 0.285269355 | 0.281  |
| cg07658508 | I  | 37 | 4  | 973177 SLC26A1              | 0.54 | 0.0014   | 2.85345 | 0.50335414 | 0.784224527 | -0.281 |
| cg04456916 | I  | 37 | 5  | 178902699                   | 0.62 | 0.0001   | 3.98291 | 0.43865058 | 0.719491554 | -0.281 |
| cg11480762 | II | 37 | 10 | 73103395 SLC29A3            | 0.58 | 0.00041  | 3.39184 | 0.52360989 | 0.804705593 | -0.281 |
| cg10694914 | II | 37 | 11 | 111250431 POU2AF1           | 0.54 | 0.0014   | 2.85345 | 0.51250259 | 0.231389013 | 0.281  |
| cg21210041 | II | 37 | 17 | 27443831 MYO18A;MYO18A      | 0.62 | 0.0001   | 3.98291 | 0.53469498 | 0.815302899 | -0.281 |
| cg15100426 | I  | 37 | 2  | 219187432 PNKD;PNKD         | 0.58 | 0.00041  | 3.39184 | 0.61466282 | 0.894397091 | -0.28  |
| cg13752114 | I  | 37 | 3  | 195489708 MUC4;MUC4;MUC4    | 0.58 | 0.00041  | 3.39184 | 0.67543979 | 0.955897198 | -0.28  |
| cg02095334 | II | 37 | 6  | 33138108 COL11A2;COL11A2;   | 0.42 | 0.02991  | 1.52413 | 0.58778028 | 0.308103679 | 0.28   |
| cg02122920 | II | 37 | 6  | 42883534 PTCRA              | 0.46 | 0.01197  | 1.92207 | 0.65615589 | 0.376007283 | 0.28   |
| cg22881435 | II | 37 | 8  | 37732086 RAB11FIP1;RAB11F   | 0.54 | 0.0014   | 2.85345 | 0.52101537 | 0.240577736 | 0.28   |
| cg03821121 | II | 37 | 11 | 12148288 MICAL2             | 0.62 | 0.0001   | 3.98291 | 0.3846952  | 0.664314873 | -0.28  |
| cg19279310 | II | 37 | 11 | 47413087                    | 0.54 | 0.0014   | 2.85345 | 0.35746818 | 0.637444065 | -0.28  |
| cg16235962 | II | 37 | 11 | 118754507 CXCR5             | 0.62 | 0.0001   | 3.98291 | 0.60331473 | 0.323690304 | 0.28   |
| cg05296619 | II | 37 | 13 | 114834683 RASA3             | 0.58 | 0.00041  | 3.39184 | 0.41407767 | 0.69421001  | -0.28  |
| cg15889847 | II | 37 | 14 | 65183532 PLEKHG3            | 0.54 | 0.0014   | 2.85345 | 0.41581338 | 0.696014675 | -0.28  |
| cg26217402 | I  | 37 | 14 | 74238381 C14orf43           | 0.58 | 0.00041  | 3.39184 | 0.49743177 | 0.21773749  | 0.28   |
| cg21602257 | II | 37 | 20 | 44538675 PLTP;PLTP          | 0.58 | 0.00041  | 3.39184 | 0.46970018 | 0.749584735 | -0.28  |
| cg01117384 | II | 37 | 20 | 56274096 PMEPA1;PMEPA1;F    | 0.5  | 0.00432  | 2.36443 | 0.50062354 | 0.22022516  | 0.28   |
| cg11986760 | II | 37 | 2  | 112420098                   | 0.67 | 2.34E-05 | 4.63072 | 0.45211534 | 0.731559631 | -0.279 |
| cg14428166 | I  | 37 | 10 | 95123753 MYOF;MYOF          | 0.54 | 0.0014   | 2.85345 | 0.63430813 | 0.913048604 | -0.279 |

|            |    |    |    |           |                   |      |          |         |            |             |        |
|------------|----|----|----|-----------|-------------------|------|----------|---------|------------|-------------|--------|
| cg12724221 | II | 37 | 10 | 99448480  | AVPI1             | 0.58 | 0.00041  | 3.39184 | 0.52112245 | 0.800320948 | -0.279 |
| cg03174521 | II | 37 | 11 | 3177865   | OSBPL5;OSBPL5;OS  | 0.58 | 0.00041  | 3.39184 | 0.45793723 | 0.736537624 | -0.279 |
| cg21494075 | II | 37 | 11 | 129817717 | PRDM10;PRDM10;I   | 0.5  | 0.00432  | 2.36443 | 0.58557209 | 0.306764937 | 0.279  |
| cg19011001 | I  | 37 | 14 | 93539613  | ITPK1;ITPK1;ITPK1 | 0.58 | 0.00041  | 3.39184 | 0.44444142 | 0.723013539 | -0.279 |
| cg12058064 | II | 37 | 15 | 86315201  | KLHL25;MIR1276    | 0.67 | 2.34E-05 | 4.63072 | 0.47627249 | 0.755640956 | -0.279 |
| cg04545079 | II | 37 | 16 | 67599924  | CTCF              | 0.5  | 0.00432  | 2.36443 | 0.64118133 | 0.361980625 | 0.279  |
| cg20814202 | II | 37 | 17 | 79128885  | AATK              | 0.42 | 0.02991  | 1.52413 | 0.53488063 | 0.813506889 | -0.279 |
| cg01591579 | I  | 37 | 2  | 234111145 | INPP5D;INPP5D     | 0.46 | 0.01197  | 1.92207 | 0.74098643 | 0.462547833 | 0.278  |
| cg26124526 | II | 37 | 5  | 60618932  |                   | 0.62 | 0.0001   | 3.98291 | 0.51040369 | 0.788364829 | -0.278 |
| cg23361127 | II | 37 | 5  | 73939283  |                   | 0.54 | 0.0014   | 2.85345 | 0.54114116 | 0.819258935 | -0.278 |
| cg23097878 | II | 37 | 11 | 45879730  | CRY2;CRY2         | 0.54 | 0.0014   | 2.85345 | 0.57922671 | 0.857236526 | -0.278 |
| cg15823461 | I  | 37 | 11 | 60699566  | TMEM132A;TMEM     | 0.54 | 0.0014   | 2.85345 | 0.62065197 | 0.34266409  | 0.278  |
| cg04226002 | II | 37 | 11 | 113953462 | ZBTB16;ZBTB16     | 0.58 | 0.00041  | 3.39184 | 0.42930943 | 0.707122311 | -0.278 |
| cg14272075 | II | 37 | 17 | 55122538  | RNF126P1          | 0.71 | 4.57E-06 | 5.34042 | 0.54023694 | 0.818325703 | -0.278 |
| cg13304825 | II | 37 | 17 | 79297548  | TMEM105           | 0.54 | 0.0014   | 2.85345 | 0.44725303 | 0.725632121 | -0.278 |
| cg02481000 | II | 37 | 1  | 2082349   | PRKCZ;PRKCZ;PRKC  | 0.58 | 0.00041  | 3.39184 | 0.38063536 | 0.658113313 | -0.277 |
| cg20452738 | II | 37 | 1  | 226828650 | ITPKB             | 0.46 | 0.01197  | 1.92207 | 0.65228577 | 0.375059335 | 0.277  |
| cg00912580 | II | 37 | 2  | 135169533 | MGAT5             | 0.46 | 0.01197  | 1.92207 | 0.51490711 | 0.238369901 | 0.277  |
| cg10168494 | II | 37 | 3  | 187635183 |                   | 0.58 | 0.00041  | 3.39184 | 0.30476683 | 0.581436754 | -0.277 |
| cg16876219 | II | 37 | 3  | 197222311 |                   | 0.46 | 0.01197  | 1.92207 | 0.61623088 | 0.339683222 | 0.277  |
| cg02309230 | II | 37 | 6  | 4612064   |                   | 0.5  | 0.00432  | 2.36443 | 0.63702271 | 0.360446884 | 0.277  |
| cg08678755 | II | 37 | 6  | 131957011 | ENPP3             | 0.42 | 0.02991  | 1.52413 | 0.66100188 | 0.383805479 | 0.277  |
| cg03066323 | II | 37 | 7  | 99970779  | PILRA;PILRA;PILRA | 0.67 | 2.34E-05 | 4.63072 | 0.52963648 | 0.806864548 | -0.277 |
| cg15235922 | II | 37 | 8  | 125678187 | MTSS1             | 0.42 | 0.02991  | 1.52413 | 0.61085901 | 0.333962519 | 0.277  |
| cg07825294 | II | 37 | 19 | 1415757   | DAZAP1;DAZAP1     | 0.54 | 0.0014   | 2.85345 | 0.52132973 | 0.798614891 | -0.277 |
| cg17774764 | II | 37 | 19 | 50921551  | SPIB              | 0.46 | 0.01197  | 1.92207 | 0.64254834 | 0.366019226 | 0.277  |
| cg11767757 | I  | 37 | 21 | 40145404  | NCRNA00114        | 0.58 | 0.00041  | 3.39184 | 0.41399724 | 0.137098174 | 0.277  |
| cg25771026 | II | 37 | 3  | 196352027 |                   | 0.58 | 0.00041  | 3.39184 | 0.46654165 | 0.742289351 | -0.276 |
| cg26348243 | I  | 37 | 6  | 31540461  | LTA;LTA           | 0.67 | 2.34E-05 | 4.63072 | 0.47295819 | 0.197379991 | 0.276  |
| cg18120259 | II | 37 | 6  | 43894639  | LOC100132354      | 0.58 | 0.00041  | 3.39184 | 0.52829569 | 0.803846309 | -0.276 |
| cg09358725 | II | 37 | 11 | 33914088  | LMO2              | 0.62 | 0.0001   | 3.98291 | 0.40989151 | 0.68544766  | -0.276 |
| cg01890836 | I  | 37 | 17 | 17055584  | MPRIP;MPRIP       | 0.54 | 0.0014   | 2.85345 | 0.46009216 | 0.736188186 | -0.276 |
| cg15532942 | II | 37 | 18 | 77220712  | NFATC1;NFATC1;NF  | 0.46 | 0.01197  | 1.92207 | 0.52749146 | 0.251016884 | 0.276  |

|            |    |    |    |                              |      |          |         |            |             |        |
|------------|----|----|----|------------------------------|------|----------|---------|------------|-------------|--------|
| cg07168232 | II | 37 | 1  | 209822928 LAMB3;LAMB3;LAN    | 0.62 | 0.0001   | 3.98291 | 0.36268419 | 0.637930047 | -0.275 |
| cg04722215 | I  | 37 | 2  | 97205147 ARID5A              | 0.67 | 2.34E-05 | 4.63072 | 0.59410834 | 0.31930546  | 0.275  |
| cg26701826 | II | 37 | 4  | 108814604 SGMS2;SGMS2;SGN    | 0.58 | 0.00041  | 3.39184 | 0.52923749 | 0.80401371  | -0.275 |
| cg01715248 | II | 37 | 9  | 93953608                     | 0.5  | 0.00432  | 2.36443 | 0.52980597 | 0.805246335 | -0.275 |
| cg01902758 | II | 37 | 11 | 8816428 ST5;ST5;ST5          | 0.58 | 0.00041  | 3.39184 | 0.3368491  | 0.612330364 | -0.275 |
| cg00502926 | II | 37 | 14 | 21510056 RNASE7              | 0.54 | 0.0014   | 2.85345 | 0.44417578 | 0.719292827 | -0.275 |
| cg17812123 | II | 37 | 15 | 101696922                    | 0.5  | 0.00432  | 2.36443 | 0.72570847 | 0.45072555  | 0.275  |
| cg03087880 | II | 37 | 16 | 49666012 ZNF423              | 0.46 | 0.01197  | 1.92207 | 0.57879131 | 0.303973738 | 0.275  |
| cg14976569 | I  | 37 | 19 | 4667105 C19orf10             | 0.62 | 0.0001   | 3.98291 | 0.54619004 | 0.821103224 | -0.275 |
| cg03408904 | II | 37 | 22 | 17956462 CECR2               | 0.62 | 0.0001   | 3.98291 | 0.41614969 | 0.690840366 | -0.275 |
| cg03989987 | II | 37 | 2  | 113885277 IL1RN;IL1RN;IL1RN; | 0.5  | 0.00432  | 2.36443 | 0.32714221 | 0.601045791 | -0.274 |
| cg16325984 | II | 37 | 2  | 240291068 HDAC4              | 0.46 | 0.01197  | 1.92207 | 0.6282881  | 0.354668439 | 0.274  |
| cg24700494 | I  | 37 | 6  | 30684284 MDC1                | 0.58 | 0.00041  | 3.39184 | 0.70193255 | 0.427552722 | 0.274  |
| cg21248060 | I  | 37 | 7  | 1039957 C7orf50;C7orf50;C7   | 0.54 | 0.0014   | 2.85345 | 0.54834147 | 0.27455381  | 0.274  |
| cg15586392 | II | 37 | 8  | 142238691 SLC45A4            | 0.58 | 0.00041  | 3.39184 | 0.56789725 | 0.841747508 | -0.274 |
| cg22006208 | II | 37 | 17 | 27309169 SEZ6;SEZ6           | 0.62 | 0.0001   | 3.98291 | 0.49005503 | 0.764063516 | -0.274 |
| cg15309910 | I  | 37 | 20 | 23067691 CD93                | 0.54 | 0.0014   | 2.85345 | 0.39301973 | 0.666883494 | -0.274 |
| cg19510565 | II | 37 | 1  | 31217240 LAPTM5              | 0.58 | 0.00041  | 3.39184 | 0.57630142 | 0.303036247 | 0.273  |
| cg01299332 | II | 37 | 5  | 79406275                     | 0.46 | 0.01197  | 1.92207 | 0.58805851 | 0.315349314 | 0.273  |
| cg09109411 | II | 37 | 5  | 149319112 PDE6A              | 0.54 | 0.0014   | 2.85345 | 0.62141891 | 0.894112751 | -0.273 |
| cg02192746 | II | 37 | 7  | 99971016 PILRA;PILRA;PILRA   | 0.58 | 0.00041  | 3.39184 | 0.33878148 | 0.611612348 | -0.273 |
| cg04838847 | I  | 37 | 8  | 110587155 GOLSYN;GOLSYN;G    | 0.5  | 0.00432  | 2.36443 | 0.7506627  | 0.47746223  | 0.273  |
| cg14557690 | II | 37 | 9  | 139978293 UAP1L1             | 0.42 | 0.02991  | 1.52413 | 0.51117542 | 0.237699508 | 0.273  |
| cg22889918 | II | 37 | 10 | 115024317                    | 0.46 | 0.01197  | 1.92207 | 0.60299895 | 0.329651512 | 0.273  |
| cg02525637 | II | 37 | 11 | 2407699 CD81                 | 0.42 | 0.02991  | 1.52413 | 0.64263385 | 0.369982926 | 0.273  |
| cg27436118 | I  | 37 | 16 | 4729905 MGRN1;MGRN1;M        | 0.58 | 0.00041  | 3.39184 | 0.58868355 | 0.861575013 | -0.273 |
| cg27461196 | II | 37 | 19 | 35630106 FXYD1;FXYD1         | 0.58 | 0.00041  | 3.39184 | 0.35979399 | 0.632338892 | -0.273 |
| cg25361506 | II | 37 | 1  | 201426290                    | 0.67 | 2.34E-05 | 4.63072 | 0.48951036 | 0.761409307 | -0.272 |
| cg26444097 | II | 37 | 4  | 2432313                      | 0.58 | 0.00041  | 3.39184 | 0.43375082 | 0.705598887 | -0.272 |
| cg19588519 | II | 37 | 10 | 125817817                    | 0.62 | 0.0001   | 3.98291 | 0.5525584  | 0.824317937 | -0.272 |
| cg09372614 | II | 37 | 13 | 114909276                    | 0.5  | 0.00432  | 2.36443 | 0.55950271 | 0.28765866  | 0.272  |
| cg06894612 | II | 37 | 14 | 69042922 RAD51L1             | 0.58 | 0.00041  | 3.39184 | 0.47075047 | 0.742788928 | -0.272 |
| cg02308232 | II | 37 | 17 | 7742762 KDM6B                | 0.58 | 0.00041  | 3.39184 | 0.53997132 | 0.811648181 | -0.272 |

|            |    |    |    |                             |      |          |         |            |             |        |
|------------|----|----|----|-----------------------------|------|----------|---------|------------|-------------|--------|
| cg12955084 | II | 37 | 19 | 41886265 TMEM91;TMEM91;     | 0.54 | 0.0014   | 2.85345 | 0.5746673  | 0.847056099 | -0.272 |
| cg21596498 | II | 37 | 19 | 42618407 POU2F2             | 0.46 | 0.01197  | 1.92207 | 0.68565572 | 0.413629706 | 0.272  |
| cg12037947 | I  | 37 | 20 | 23067752 CD93               | 0.58 | 0.00041  | 3.39184 | 0.4549515  | 0.726802892 | -0.272 |
| cg05162166 | II | 37 | 22 | 41684460                    | 0.54 | 0.0014   | 2.85345 | 0.49893554 | 0.770999175 | -0.272 |
| cg09017001 | II | 37 | 1  | 31870508                    | 0.58 | 0.00041  | 3.39184 | 0.45956207 | 0.730698077 | -0.271 |
| cg05350315 | II | 37 | 1  | 32716961 LCK;LCK            | 0.54 | 0.0014   | 2.85345 | 0.44213775 | 0.171622003 | 0.271  |
| cg22610434 | II | 37 | 1  | 158259914 CD1C              | 0.46 | 0.01197  | 1.92207 | 0.5458814  | 0.274508009 | 0.271  |
| cg15287850 | II | 37 | 3  | 186739599 ST6GAL1;ST6GAL1;' | 0.46 | 0.01197  | 1.92207 | 0.63849982 | 0.36759428  | 0.271  |
| cg06496803 | II | 37 | 4  | 6940915 TBC1D14;TBC1D14     | 0.5  | 0.00432  | 2.36443 | 0.45043648 | 0.72138777  | -0.271 |
| cg03980424 | II | 37 | 10 | 3526723                     | 0.5  | 0.00432  | 2.36443 | 0.72461193 | 0.454097167 | 0.271  |
| cg04682193 | II | 37 | 12 | 121867725 KDM2B;KDM2B       | 0.54 | 0.0014   | 2.85345 | 0.45483324 | 0.725798013 | -0.271 |
| cg24967811 | II | 37 | 12 | 123503709 PITPNM2           | 0.54 | 0.0014   | 2.85345 | 0.54673113 | 0.817802729 | -0.271 |
| cg02481950 | II | 37 | 16 | 21665002 METTL9;IGSF6;MET   | 0.58 | 0.00041  | 3.39184 | 0.50120509 | 0.772321909 | -0.271 |
| cg03739177 | I  | 37 | 17 | 27889826 ABHD15             | 0.54 | 0.0014   | 2.85345 | 0.58680571 | 0.857961099 | -0.271 |
| cg22331200 | II | 37 | 17 | 56355362 MPO                | 0.58 | 0.00041  | 3.39184 | 0.50255192 | 0.77358854  | -0.271 |
| cg00058291 | II | 37 | 1  | 228974133                   | 0.62 | 0.0001   | 3.98291 | 0.63907029 | 0.909560711 | -0.27  |
| cg24323726 | II | 37 | 3  | 111314186 ZBED2;CD96;CD96   | 0.46 | 0.01197  | 1.92207 | 0.65201883 | 0.381523946 | 0.27   |
| cg13005202 | I  | 37 | 5  | 1555844                     | 0.54 | 0.0014   | 2.85345 | 0.37407112 | 0.64390174  | -0.27  |
| cg02084118 | I  | 37 | 7  | 971027 ADAP1                | 0.58 | 0.00041  | 3.39184 | 0.58234257 | 0.852431415 | -0.27  |
| cg19610383 | II | 37 | 8  | 26485445 DPYSL2             | 0.46 | 0.01197  | 1.92207 | 0.6972015  | 0.427315859 | 0.27   |
| cg05755408 | II | 37 | 8  | 27157515 TRIM35             | 0.5  | 0.00432  | 2.36443 | 0.55119405 | 0.82116445  | -0.27  |
| cg05623815 | II | 37 | 10 | 114602832                   | 0.46 | 0.01197  | 1.92207 | 0.58576795 | 0.316077678 | 0.27   |
| cg25311466 | II | 37 | 4  | 6277273 WFS1;WFS1           | 0.54 | 0.0014   | 2.85345 | 0.5651716  | 0.296438936 | 0.269  |
| cg26406292 | I  | 37 | 7  | 75292248 HIP1               | 0.5  | 0.00432  | 2.36443 | 0.55022233 | 0.280801245 | 0.269  |
| cg15312943 | II | 37 | 11 | 17843855 SERGEF             | 0.58 | 0.00041  | 3.39184 | 0.59571065 | 0.865200643 | -0.269 |
| cg16280667 | II | 37 | 11 | 118754593 CXCR5;CXCR5       | 0.58 | 0.00041  | 3.39184 | 0.61184468 | 0.342602114 | 0.269  |
| cg26385126 | I  | 37 | 12 | 124912021 NCOR2;NCOR2       | 0.62 | 0.0001   | 3.98291 | 0.61427179 | 0.883200711 | -0.269 |
| cg01869288 | II | 37 | 15 | 31523257                    | 0.46 | 0.01197  | 1.92207 | 0.5691493  | 0.299698472 | 0.269  |
| cg09201499 | I  | 37 | 16 | 88838113 FAM38A             | 0.62 | 0.0001   | 3.98291 | 0.70501197 | 0.435767214 | 0.269  |
| cg22396850 | II | 37 | 17 | 41121153 AARSD1;AARSD1;A    | 0.54 | 0.0014   | 2.85345 | 0.41355777 | 0.682582644 | -0.269 |
| cg17432627 | II | 37 | 21 | 40124277 NCRNA00114;NCRN    | 0.54 | 0.0014   | 2.85345 | 0.4759207  | 0.745296628 | -0.269 |
| cg16664584 | II | 37 | 1  | 94454989                    | 0.5  | 0.00432  | 2.36443 | 0.45408517 | 0.722114649 | -0.268 |
| cg10702418 | II | 37 | 7  | 157090031                   | 0.67 | 2.34E-05 | 4.63072 | 0.50858073 | 0.776607325 | -0.268 |

|            |    |    |    |           |                         |      |          |         |            |             |        |
|------------|----|----|----|-----------|-------------------------|------|----------|---------|------------|-------------|--------|
| cg26841425 | II | 37 | 10 | 45958771  | MARCH8;MARCH8;          | 0.54 | 0.0014   | 2.85345 | 0.54562123 | 0.813625342 | -0.268 |
| cg21359303 | II | 37 | 10 | 106068573 |                         | 0.67 | 2.34E-05 | 4.63072 | 0.70642907 | 0.438649778 | 0.268  |
| cg23600372 | II | 37 | 12 | 56036796  |                         | 0.54 | 0.0014   | 2.85345 | 0.55009778 | 0.818433481 | -0.268 |
| cg02787852 | I  | 37 | 16 | 27414536  | IL21R;IL21R;IL21R       | 0.79 | 1.06E-07 | 6.97389 | 0.66845539 | 0.400599676 | 0.268  |
| cg05778424 | II | 37 | 17 | 55169508  | AKAP1                   | 0.58 | 0.00041  | 3.39184 | 0.44095725 | 0.70924052  | -0.268 |
| cg00471371 | II | 37 | 18 | 74114728  | ZNF516                  | 0.62 | 0.0001   | 3.98291 | 0.58892948 | 0.856705183 | -0.268 |
| cg24940706 | II | 37 | 19 | 1648682   | TCF3;TCF3               | 0.5  | 0.00432  | 2.36443 | 0.60012907 | 0.332086338 | 0.268  |
| cg19835973 | I  | 37 | 19 | 54746613  | LILRA6;LILRA6           | 0.5  | 0.00432  | 2.36443 | 0.55797007 | 0.825486591 | -0.268 |
| cg20070090 | II | 37 | 1  | 153363489 | S100A8                  | 0.54 | 0.0014   | 2.85345 | 0.48417683 | 0.751054006 | -0.267 |
| cg07495389 | II | 37 | 2  | 27233872  | MAPRE3                  | 0.54 | 0.0014   | 2.85345 | 0.46859172 | 0.735751074 | -0.267 |
| cg02053451 | II | 37 | 2  | 47922605  |                         | 0.46 | 0.01197  | 1.92207 | 0.68120117 | 0.41414396  | 0.267  |
| cg02863947 | II | 37 | 3  | 119499190 | NR1I2;NR1I2             | 0.58 | 0.00041  | 3.39184 | 0.53770937 | 0.805059803 | -0.267 |
| cg12636435 | II | 37 | 5  | 149867965 |                         | 0.58 | 0.00041  | 3.39184 | 0.42118927 | 0.6881194   | -0.267 |
| cg18664915 | II | 37 | 7  | 1043861   | C7orf50;C7orf50;C7orf50 | 0.46 | 0.01197  | 1.92207 | 0.58149369 | 0.314473902 | 0.267  |
| cg20748065 | II | 37 | 7  | 75583421  | POR                     | 0.54 | 0.0014   | 2.85345 | 0.26589692 | 0.532767424 | -0.267 |
| cg26247508 | II | 37 | 10 | 82299669  | SH2D4B;SH2D4B           | 0.5  | 0.00432  | 2.36443 | 0.57865276 | 0.311844018 | 0.267  |
| cg16846069 | II | 37 | 12 | 6462681   | SCNN1A;SCNN1A;SCNN1A    | 0.58 | 0.00041  | 3.39184 | 0.45359124 | 0.720480503 | -0.267 |
| cg16398451 | II | 37 | 12 | 51593266  | POU6F1;POU6F1           | 0.54 | 0.0014   | 2.85345 | 0.50218322 | 0.769382917 | -0.267 |
| cg03963853 | I  | 37 | 16 | 4732369   | MGRN1;MGRN1;MGRN1       | 0.58 | 0.00041  | 3.39184 | 0.64066141 | 0.907891019 | -0.267 |
| cg04686354 | II | 37 | 17 | 73261880  | MRPS7                   | 0.67 | 2.34E-05 | 4.63072 | 0.50389127 | 0.771292427 | -0.267 |
| cg25470197 | II | 37 | 22 | 17598511  | CECR6;CECR6;CECR6       | 0.67 | 2.34E-05 | 4.63072 | 0.31738281 | 0.583924772 | -0.267 |
| cg14919455 | II | 37 | 6  | 7167468   | RREB1;RREB1;RREB1       | 0.58 | 0.00041  | 3.39184 | 0.54230555 | 0.808462764 | -0.266 |
| cg10411221 | II | 37 | 6  | 32904317  | HLA-DMB                 | 0.58 | 0.00041  | 3.39184 | 0.48926063 | 0.754778558 | -0.266 |
| cg14168009 | II | 37 | 7  | 3082006   | CARD11                  | 0.58 | 0.00041  | 3.39184 | 0.68682369 | 0.420693227 | 0.266  |
| cg10396713 | II | 37 | 8  | 602097    |                         | 0.62 | 0.0001   | 3.98291 | 0.54144088 | 0.806971982 | -0.266 |
| cg05720871 | II | 37 | 8  | 110587264 | GOLSYN;GOLSYN;GOLSYN    | 0.54 | 0.0014   | 2.85345 | 0.68662175 | 0.420782282 | 0.266  |
| cg14087413 | II | 37 | 9  | 35848330  | TMEM8B;TMEM8B           | 0.5  | 0.00432  | 2.36443 | 0.43299661 | 0.167385185 | 0.266  |
| cg03580065 | II | 37 | 10 | 99183360  |                         | 0.58 | 0.00041  | 3.39184 | 0.42905092 | 0.694993612 | -0.266 |
| cg04468741 | II | 37 | 11 | 12181467  | MICAL2                  | 0.62 | 0.0001   | 3.98291 | 0.56315728 | 0.829581509 | -0.266 |
| cg14331899 | I  | 37 | 11 | 61125360  | CYBASC3;CYBASC3;CYBASC3 | 0.54 | 0.0014   | 2.85345 | 0.68379561 | 0.417598279 | 0.266  |
| cg16941122 | I  | 37 | 13 | 99965936  | UBAC2;UBAC2;UBAC2       | 0.54 | 0.0014   | 2.85345 | 0.46064115 | 0.726691079 | -0.266 |
| cg12873119 | II | 37 | 20 | 23067771  | CD93                    | 0.54 | 0.0014   | 2.85345 | 0.47830515 | 0.744357263 | -0.266 |
| cg07206827 | II | 37 | 1  | 151778404 | LINGO4                  | 0.46 | 0.01197  | 1.92207 | 0.54348901 | 0.27889533  | 0.265  |

|            |    |    |    |                            |      |          |         |            |             |        |
|------------|----|----|----|----------------------------|------|----------|---------|------------|-------------|--------|
| cg22848646 | II | 37 | 1  | 203171499                  | 0.54 | 0.0014   | 2.85345 | 0.5098915  | 0.774792042 | -0.265 |
| cg23010507 | I  | 37 | 5  | 1555887                    | 0.5  | 0.00432  | 2.36443 | 0.46308056 | 0.727725435 | -0.265 |
| cg01610123 | I  | 37 | 5  | 134770100                  | 0.54 | 0.0014   | 2.85345 | 0.46957947 | 0.734357149 | -0.265 |
| cg16182757 | II | 37 | 6  | 126658808                  | 0.62 | 0.0001   | 3.98291 | 0.52812113 | 0.792693786 | -0.265 |
| cg09797463 | II | 37 | 10 | 90995297 LIPA;LIPA         | 0.62 | 0.0001   | 3.98291 | 0.55054881 | 0.815474152 | -0.265 |
| cg26578983 | I  | 37 | 16 | 85075249 KIAA0513          | 0.54 | 0.0014   | 2.85345 | 0.61928939 | 0.883968371 | -0.265 |
| cg11377047 | II | 37 | 1  | 26881009 MIR1976;RPS6KA1;  | 0.5  | 0.00432  | 2.36443 | 0.40944096 | 0.673730226 | -0.264 |
| cg27128761 | II | 37 | 5  | 151055650 SPARC            | 0.62 | 0.0001   | 3.98291 | 0.50986427 | 0.774046142 | -0.264 |
| cg10462778 | II | 37 | 5  | 172314133 ERGIC1           | 0.62 | 0.0001   | 3.98291 | 0.55846411 | 0.822048501 | -0.264 |
| cg11460110 | I  | 37 | 6  | 30530458 PRR3;PRR3         | 0.5  | 0.00432  | 2.36443 | 0.55384953 | 0.817876797 | -0.264 |
| cg05569131 | II | 37 | 6  | 36665620                   | 0.58 | 0.00041  | 3.39184 | 0.3568093  | 0.620520117 | -0.264 |
| cg00920892 | II | 37 | 8  | 37732224 RAB11FIP1;RAB11F  | 0.54 | 0.0014   | 2.85345 | 0.47662035 | 0.21263153  | 0.264  |
| cg19222784 | II | 37 | 11 | 20044428 NAV2;NAV2;NAV2;I  | 0.54 | 0.0014   | 2.85345 | 0.59640114 | 0.332651899 | 0.264  |
| cg01117339 | II | 37 | 11 | 73737124                   | 0.5  | 0.00432  | 2.36443 | 0.42749561 | 0.691956966 | -0.264 |
| cg20446824 | II | 37 | 12 | 125076771                  | 0.58 | 0.00041  | 3.39184 | 0.43085631 | 0.694539401 | -0.264 |
| cg15070897 | II | 37 | 14 | 23284968 SLC7A7;SLC7A7;SLC | 0.46 | 0.01197  | 1.92207 | 0.40913884 | 0.672675734 | -0.264 |
| cg14827807 | II | 37 | 1  | 150943828 LASS2;LASS2      | 0.62 | 0.0001   | 3.98291 | 0.38010471 | 0.643065756 | -0.263 |
| cg06706156 | II | 37 | 1  | 230183251                  | 0.58 | 0.00041  | 3.39184 | 0.536923   | 0.799900156 | -0.263 |
| cg11608958 | II | 37 | 2  | 207836769                  | 0.62 | 0.0001   | 3.98291 | 0.56550135 | 0.828800163 | -0.263 |
| cg22387323 | II | 37 | 4  | 24975717 CCDC149           | 0.58 | 0.00041  | 3.39184 | 0.50210311 | 0.765475344 | -0.263 |
| cg16586807 | II | 37 | 7  | 2948081 CARD11             | 0.46 | 0.01197  | 1.92207 | 0.73915743 | 0.47615872  | 0.263  |
| cg19089701 | I  | 37 | 8  | 126398731                  | 0.42 | 0.02991  | 1.52413 | 0.37290893 | 0.635836987 | -0.263 |
| cg02376282 | I  | 37 | 11 | 1543206 HCCA2              | 0.67 | 2.34E-05 | 4.63072 | 0.69105505 | 0.42792385  | 0.263  |
| cg07920381 | II | 37 | 12 | 132303685                  | 0.54 | 0.0014   | 2.85345 | 0.4716215  | 0.734677561 | -0.263 |
| cg00813162 | I  | 37 | 14 | 69443362 ACTN1;ACTN1;ACTI  | 0.54 | 0.0014   | 2.85345 | 0.53476415 | 0.797899857 | -0.263 |
| cg07780528 | II | 37 | 19 | 35630334 FXYP1;FXYP1       | 0.58 | 0.00041  | 3.39184 | 0.30155543 | 0.564659769 | -0.263 |
| cg08939394 | II | 37 | 1  | 17614144                   | 0.54 | 0.0014   | 2.85345 | 0.35109357 | 0.613268902 | -0.262 |
| cg04084354 | II | 37 | 1  | 56721795                   | 0.5  | 0.00432  | 2.36443 | 0.4212029  | 0.682855026 | -0.262 |
| cg19131667 | II | 37 | 3  | 17236940 TBC1D5;TBC1D5;TE  | 0.42 | 0.02991  | 1.52413 | 0.578748   | 0.316526301 | 0.262  |
| cg25025545 | II | 37 | 6  | 14136628 CD83;CD83         | 0.54 | 0.0014   | 2.85345 | 0.56029437 | 0.822143186 | -0.262 |
| cg09379497 | II | 37 | 6  | 30624467 DHX16;DHX16       | 0.5  | 0.00432  | 2.36443 | 0.54713983 | 0.809469905 | -0.262 |
| cg26959655 | II | 37 | 8  | 103379529 UBR5             | 0.54 | 0.0014   | 2.85345 | 0.60777233 | 0.870176199 | -0.262 |
| cg20851559 | II | 37 | 8  | 135613822 ZFAT;ZFAT;ZFAT   | 0.54 | 0.0014   | 2.85345 | 0.78201432 | 0.520259908 | 0.262  |

|            |    |    |    |                           |      |          |         |            |             |        |
|------------|----|----|----|---------------------------|------|----------|---------|------------|-------------|--------|
| cg15511120 | II | 37 | 11 | 6598119                   | 0.58 | 0.00041  | 3.39184 | 0.41478369 | 0.676705922 | -0.262 |
| cg08670658 | II | 37 | 11 | 67052992 ADRBK1           | 0.58 | 0.00041  | 3.39184 | 0.5693882  | 0.830926854 | -0.262 |
| cg07943111 | I  | 37 | 17 | 1492285 SLC43A2           | 0.67 | 2.34E-05 | 4.63072 | 0.5223543  | 0.784519719 | -0.262 |
| cg03762242 | II | 37 | 17 | 9940004 GAS7;GAS7;GAS7    | 0.62 | 0.0001   | 3.98291 | 0.36993947 | 0.632207622 | -0.262 |
| cg03919657 | II | 37 | 17 | 48502312 ACSF2            | 0.71 | 4.57E-06 | 5.34042 | 0.40057064 | 0.66294452  | -0.262 |
| cg07564563 | II | 37 | 19 | 3548977 C19orf28;C19orf28 | 0.58 | 0.00041  | 3.39184 | 0.49019554 | 0.752318924 | -0.262 |
| cg27160007 | II | 37 | 19 | 41225374 ITPKC            | 0.58 | 0.00041  | 3.39184 | 0.58860558 | 0.326950056 | 0.262  |
| cg21524538 | I  | 37 | 20 | 1310846 SDCBP2            | 0.58 | 0.00041  | 3.39184 | 0.68898567 | 0.426962344 | 0.262  |
| cg25724895 | II | 37 | 20 | 58630390 C20orf197        | 0.54 | 0.0014   | 2.85345 | 0.37076707 | 0.633162922 | -0.262 |
| cg17451941 | II | 37 | 1  | 236254344                 | 0.67 | 2.34E-05 | 4.63072 | 0.50198054 | 0.7630177   | -0.261 |
| cg05551003 | II | 37 | 3  | 11267072 HRH1;HRH1;HRH1   | 0.67 | 2.34E-05 | 4.63072 | 0.55042206 | 0.811557995 | -0.261 |
| cg19090437 | II | 37 | 4  | 38080799 TBC1D1           | 0.54 | 0.0014   | 2.85345 | 0.37729195 | 0.638016683 | -0.261 |
| cg22185977 | I  | 37 | 5  | 1518133 LPCAT1            | 0.62 | 0.0001   | 3.98291 | 0.52727693 | 0.788731681 | -0.261 |
| cg05856556 | II | 37 | 7  | 150104705 LOC728743       | 0.46 | 0.01197  | 1.92207 | 0.59675885 | 0.336054972 | 0.261  |
| cg04764812 | II | 37 | 10 | 76582315                  | 0.58 | 0.00041  | 3.39184 | 0.42032144 | 0.680845153 | -0.261 |
| cg04421348 | II | 37 | 10 | 82299737 SH2D4B;SH2D4B    | 0.46 | 0.01197  | 1.92207 | 0.56246143 | 0.301959816 | 0.261  |
| cg20180364 | II | 37 | 10 | 94448532 HHEX             | 0.54 | 0.0014   | 2.85345 | 0.37335216 | 0.63421025  | -0.261 |
| cg09020213 | II | 37 | 13 | 114810096 RASA3           | 0.62 | 0.0001   | 3.98291 | 0.34848635 | 0.609967059 | -0.261 |
| cg26318872 | II | 37 | 14 | 104158729 KLC1;KLC1       | 0.42 | 0.02991  | 1.52413 | 0.67776129 | 0.416315113 | 0.261  |
| cg06257110 | II | 37 | 16 | 21658497 METTL9;IGSF6;MET | 0.67 | 2.34E-05 | 4.63072 | 0.75792457 | 0.497159109 | 0.261  |
| cg20497635 | II | 37 | 17 | 998504 ABR;ABR;ABR        | 0.54 | 0.0014   | 2.85345 | 0.41031369 | 0.671699788 | -0.261 |
| cg13241751 | II | 37 | 17 | 49009658                  | 0.62 | 0.0001   | 3.98291 | 0.55720885 | 0.817737964 | -0.261 |
| cg08472008 | II | 37 | 4  | 3531603 LRPAP1            | 0.5  | 0.00432  | 2.36443 | 0.48340058 | 0.743118163 | -0.26  |
| cg24211388 | II | 37 | 6  | 31582837 AIF1;AIF1;AIF1   | 0.58 | 0.00041  | 3.39184 | 0.41805674 | 0.677795616 | -0.26  |
| cg16809457 | II | 37 | 6  | 90399677 MDN1             | 0.54 | 0.0014   | 2.85345 | 0.58386025 | 0.843778282 | -0.26  |
| cg19708055 | I  | 37 | 6  | 168045556                 | 0.46 | 0.01197  | 1.92207 | 0.63667652 | 0.377112507 | 0.26   |
| cg11051139 | II | 37 | 12 | 52580428 KRT80;KRT80      | 0.58 | 0.00041  | 3.39184 | 0.48832185 | 0.748025624 | -0.26  |
| cg23466769 | II | 37 | 13 | 114801307 RASA3           | 0.58 | 0.00041  | 3.39184 | 0.55855502 | 0.818999708 | -0.26  |
| cg11341011 | II | 37 | 17 | 2632132                   | 0.5  | 0.00432  | 2.36443 | 0.70654248 | 0.446967182 | 0.26   |
| cg01160079 | II | 37 | 17 | 64782413 PRKCA;MIR634     | 0.5  | 0.00432  | 2.36443 | 0.72562697 | 0.465748454 | 0.26   |
| cg23463608 | I  | 37 | 19 | 2607757 GNG7              | 0.62 | 0.0001   | 3.98291 | 0.6276547  | 0.367833785 | 0.26   |
| cg16185947 | II | 37 | 19 | 48689918                  | 0.5  | 0.00432  | 2.36443 | 0.65142827 | 0.390994457 | 0.26   |
| cg25898577 | I  | 37 | 22 | 22292241 PPM1F            | 0.5  | 0.00432  | 2.36443 | 0.56664432 | 0.826517194 | -0.26  |

|            |    |    |    |                            |      |          |         |            |             |        |
|------------|----|----|----|----------------------------|------|----------|---------|------------|-------------|--------|
| cg19404444 | II | 37 | 1  | 2164602 SKI                | 0.58 | 0.00041  | 3.39184 | 0.5133332  | 0.772205797 | -0.259 |
| cg09131339 | II | 37 | 1  | 109914235 SORT1            | 0.54 | 0.0014   | 2.85345 | 0.38401411 | 0.64265445  | -0.259 |
| cg09154256 | II | 37 | 2  | 65352897 RAB1A;RAB1A       | 0.58 | 0.00041  | 3.39184 | 0.5165808  | 0.775943741 | -0.259 |
| cg24678502 | II | 37 | 2  | 242139599 ANO7             | 0.54 | 0.0014   | 2.85345 | 0.51364461 | 0.772265997 | -0.259 |
| cg26923863 | I  | 37 | 4  | 1221838 CTBP1;CTBP1        | 0.5  | 0.00432  | 2.36443 | 0.26778825 | 0.52666807  | -0.259 |
| cg21794222 | I  | 37 | 6  | 167536063 CCR6;CCR6        | 0.62 | 0.0001   | 3.98291 | 0.5855624  | 0.326403941 | 0.259  |
| cg06436185 | I  | 37 | 7  | 151442351 PRKAG2;PRKAG2    | 0.5  | 0.00432  | 2.36443 | 0.52480596 | 0.783991692 | -0.259 |
| cg02137956 | II | 37 | 7  | 157092982                  | 0.58 | 0.00041  | 3.39184 | 0.52820874 | 0.786958713 | -0.259 |
| cg19069360 | II | 37 | 12 | 1922058 CACNA2D4           | 0.62 | 0.0001   | 3.98291 | 0.49107976 | 0.750062708 | -0.259 |
| cg20909017 | II | 37 | 12 | 54805345 ITGA5             | 0.54 | 0.0014   | 2.85345 | 0.35346751 | 0.612966472 | -0.259 |
| cg25708790 | I  | 37 | 12 | 132549361 EP400            | 0.62 | 0.0001   | 3.98291 | 0.54986134 | 0.291309683 | 0.259  |
| cg10548805 | II | 37 | 14 | 101538070                  | 0.5  | 0.00432  | 2.36443 | 0.5830143  | 0.324278988 | 0.259  |
| cg19030682 | I  | 37 | 17 | 79218991 SLC38A10          | 0.67 | 2.34E-05 | 4.63072 | 0.61908004 | 0.359956668 | 0.259  |
| cg21837189 | II | 37 | 1  | 226085836                  | 0.54 | 0.0014   | 2.85345 | 0.55268666 | 0.294842908 | 0.258  |
| cg10275766 | II | 37 | 2  | 173591150 LOC91149         | 0.58 | 0.00041  | 3.39184 | 0.44525651 | 0.703052903 | -0.258 |
| cg13742400 | I  | 37 | 2  | 225639708 DOCK10           | 0.58 | 0.00041  | 3.39184 | 0.60939263 | 0.867762999 | -0.258 |
| cg11236746 | II | 37 | 3  | 33096255 GLB1;GLB1;GLB1    | 0.58 | 0.00041  | 3.39184 | 0.37882884 | 0.636413804 | -0.258 |
| cg16684117 | I  | 37 | 5  | 148808456 MIR143;LOC728264 | 0.62 | 0.0001   | 3.98291 | 0.39295643 | 0.65049411  | -0.258 |
| cg07507446 | II | 37 | 6  | 29928362                   | 0.62 | 0.0001   | 3.98291 | 0.53450805 | 0.792433756 | -0.258 |
| cg01404750 | II | 37 | 13 | 113493939 ATP11A;ATP11A    | 0.46 | 0.01197  | 1.92207 | 0.67368307 | 0.41605216  | 0.258  |
| cg24777950 | II | 37 | 14 | 25046121 CTSG              | 0.46 | 0.01197  | 1.92207 | 0.46206908 | 0.720312068 | -0.258 |
| cg08363067 | II | 37 | 16 | 16170085 ABCC1;ABCC1;ABCC1 | 0.62 | 0.0001   | 3.98291 | 0.35353874 | 0.612025688 | -0.258 |
| cg15286847 | II | 37 | 16 | 84690433 KLHL36            | 0.5  | 0.00432  | 2.36443 | 0.55241599 | 0.294688021 | 0.258  |
| cg10732094 | II | 37 | 19 | 45957466                   | 0.54 | 0.0014   | 2.85345 | 0.41199623 | 0.669644871 | -0.258 |
| cg04159878 | II | 37 | 1  | 110179127                  | 0.58 | 0.00041  | 3.39184 | 0.45878482 | 0.716250467 | -0.257 |
| cg15591803 | II | 37 | 1  | 111733668 DENND2D          | 0.58 | 0.00041  | 3.39184 | 0.51523583 | 0.77263929  | -0.257 |
| cg17173896 | I  | 37 | 4  | 24975754 CCDC149           | 0.58 | 0.00041  | 3.39184 | 0.48434191 | 0.741648355 | -0.257 |
| cg01360627 | I  | 37 | 6  | 31544931 TNF               | 0.62 | 0.0001   | 3.98291 | 0.72842305 | 0.471527292 | 0.257  |
| cg14533068 | I  | 37 | 6  | 158507953 SYNJ2            | 0.62 | 0.0001   | 3.98291 | 0.66033814 | 0.91684151  | -0.257 |
| cg03567939 | II | 37 | 7  | 151506147 PRKAG2;PRKAG2    | 0.75 | 7.61E-07 | 6.11857 | 0.53711725 | 0.794462949 | -0.257 |
| cg18444544 | II | 37 | 8  | 22852741 RHOBTB2;RHOBTB2   | 0.54 | 0.0014   | 2.85345 | 0.46733723 | 0.723979181 | -0.257 |
| cg02853355 | II | 37 | 16 | 85132373 FAM92B            | 0.54 | 0.0014   | 2.85345 | 0.5729168  | 0.830281995 | -0.257 |
| cg15576517 | I  | 37 | 19 | 7711153 STXBP2;STXBP2      | 0.54 | 0.0014   | 2.85345 | 0.63009907 | 0.886922523 | -0.257 |

|            |    |    |    |                               |      |          |         |            |             |        |
|------------|----|----|----|-------------------------------|------|----------|---------|------------|-------------|--------|
| cg17907003 | II | 37 | 1  | 117533414                     | 0.62 | 0.0001   | 3.98291 | 0.58551634 | 0.841517138 | -0.256 |
| cg12073436 | I  | 37 | 1  | 206958014                     | 0.5  | 0.00432  | 2.36443 | 0.72187592 | 0.466166985 | 0.256  |
| cg00483217 | II | 37 | 2  | 25321917 EFR3B                | 0.58 | 0.00041  | 3.39184 | 0.54300809 | 0.798881976 | -0.256 |
| cg15058645 | II | 37 | 2  | 175528343 WIPF1               | 0.62 | 0.0001   | 3.98291 | 0.36151144 | 0.617130336 | -0.256 |
| cg23275644 | II | 37 | 5  | 10457079 ROPN1L               | 0.58 | 0.00041  | 3.39184 | 0.56612917 | 0.822322593 | -0.256 |
| cg11125805 | II | 37 | 5  | 150678162 SLC36A3;SLC36A3     | 0.58 | 0.00041  | 3.39184 | 0.50424495 | 0.760630899 | -0.256 |
| cg19849557 | I  | 37 | 6  | 30619242 C6orf136;C6orf136    | 0.42 | 0.02991  | 1.52413 | 0.61346766 | 0.357943424 | 0.256  |
| cg20741105 | II | 37 | 7  | 43686889 C7orf44              | 0.46 | 0.01197  | 1.92207 | 0.57387475 | 0.317479814 | 0.256  |
| cg01058360 | II | 37 | 7  | 151442371 PRKAG2;PRKAG2       | 0.5  | 0.00432  | 2.36443 | 0.57466322 | 0.830921118 | -0.256 |
| cg06303635 | II | 37 | 10 | 45958759 MARCH8;MARCH8;       | 0.54 | 0.0014   | 2.85345 | 0.56987554 | 0.826247525 | -0.256 |
| cg01039876 | II | 37 | 15 | 43559308 TGM5;TGM5            | 0.5  | 0.00432  | 2.36443 | 0.39226478 | 0.648050392 | -0.256 |
| cg02668248 | I  | 37 | 19 | 16437789 KLF2                 | 0.54 | 0.0014   | 2.85345 | 0.4733826  | 0.217055224 | 0.256  |
| cg01261013 | II | 37 | 21 | 37691747 MORC3                | 0.67 | 2.34E-05 | 4.63072 | 0.59451997 | 0.850649743 | -0.256 |
| cg19356022 | II | 37 | 1  | 154943932 SHC1;SHC1;SHC1;SHC1 | 0.58 | 0.00041  | 3.39184 | 0.43165376 | 0.686811079 | -0.255 |
| cg22626169 | II | 37 | 6  | 6890951                       | 0.54 | 0.0014   | 2.85345 | 0.52362249 | 0.778907141 | -0.255 |
| cg22164009 | II | 37 | 6  | 14729030                      | 0.62 | 0.0001   | 3.98291 | 0.47402038 | 0.728560864 | -0.255 |
| cg13534791 | II | 37 | 9  | 35042344 C9orf131;C9orf131    | 0.62 | 0.0001   | 3.98291 | 0.41489028 | 0.669745823 | -0.255 |
| cg14317609 | I  | 37 | 9  | 36986006 PAX5                 | 0.46 | 0.01197  | 1.92207 | 0.20769521 | 0.462517019 | -0.255 |
| cg24861866 | II | 37 | 10 | 135106684 TUBGCP2             | 0.62 | 0.0001   | 3.98291 | 0.4991677  | 0.754443295 | -0.255 |
| cg18072687 | II | 37 | 11 | 2406272 CD81                  | 0.46 | 0.01197  | 1.92207 | 0.69281245 | 0.438012219 | 0.255  |
| cg25068347 | II | 37 | 11 | 128343784 ETS1;ETS1;ETS1      | 0.58 | 0.00041  | 3.39184 | 0.67465522 | 0.419944571 | 0.255  |
| cg27255275 | II | 37 | 11 | 129766154 NFRKB               | 0.54 | 0.0014   | 2.85345 | 0.46725209 | 0.722498669 | -0.255 |
| cg05900955 | II | 37 | 13 | 114918509                     | 0.67 | 2.34E-05 | 4.63072 | 0.5773328  | 0.832737721 | -0.255 |
| cg18568335 | II | 37 | 14 | 105792505 PACS2;PACS2         | 0.54 | 0.0014   | 2.85345 | 0.54507342 | 0.800211561 | -0.255 |
| cg23083936 | II | 37 | 19 | 41915452 BCKDHA;BCKDHA        | 0.62 | 0.0001   | 3.98291 | 0.48413046 | 0.73958033  | -0.255 |
| cg08599437 | II | 37 | 22 | 28033286                      | 0.5  | 0.00432  | 2.36443 | 0.57628665 | 0.321283883 | 0.255  |
| cg22932427 | II | 37 | 1  | 155615664                     | 0.62 | 0.0001   | 3.98291 | 0.48236832 | 0.735945085 | -0.254 |
| cg17935536 | II | 37 | 2  | 60755743 BCL11A;BCL11A;BCL11A | 0.58 | 0.00041  | 3.39184 | 0.41263071 | 0.666719048 | -0.254 |
| cg18275512 | II | 37 | 3  | 10479218 ATP2B2;ATP2B2        | 0.5  | 0.00432  | 2.36443 | 0.50059478 | 0.247030524 | 0.254  |
| cg10426370 | II | 37 | 5  | 54282459 ESM1;ESM1            | 0.54 | 0.0014   | 2.85345 | 0.55511483 | 0.301343288 | 0.254  |
| cg25463483 | II | 37 | 6  | 30530544 PRR3;PRR3            | 0.62 | 0.0001   | 3.98291 | 0.50073423 | 0.754299689 | -0.254 |
| cg10476003 | II | 37 | 6  | 31540169 LTA;LTA;LTA          | 0.71 | 4.57E-06 | 5.34042 | 0.5485509  | 0.294462195 | 0.254  |
| cg17622855 | II | 37 | 6  | 157982358 ZDHHC14;ZDHHC14     | 0.5  | 0.00432  | 2.36443 | 0.60615085 | 0.352536618 | 0.254  |

|            |    |    |    |                            |      |          |         |            |             |        |
|------------|----|----|----|----------------------------|------|----------|---------|------------|-------------|--------|
| cg02420480 | II | 37 | 7  | 41919892                   | 0.58 | 0.00041  | 3.39184 | 0.45898282 | 0.712826745 | -0.254 |
| cg06257058 | II | 37 | 7  | 99683264                   | 0.54 | 0.0014   | 2.85345 | 0.54625412 | 0.800701531 | -0.254 |
| cg26208815 | II | 37 | 7  | 158263277 PTPRN2;PTPRN2;PT | 0.58 | 0.00041  | 3.39184 | 0.6011826  | 0.855616044 | -0.254 |
| cg22249612 | I  | 37 | 12 | 56121485 CD63;CD63         | 0.42 | 0.02991  | 1.52413 | 0.57821516 | 0.831900133 | -0.254 |
| cg05554494 | II | 37 | 16 | 3306685 MEFV               | 0.67 | 2.34E-05 | 4.63072 | 0.4208388  | 0.674868346 | -0.254 |
| cg01394781 | II | 37 | 16 | 16214213 ABCC1;ABCC1;ABCC  | 0.71 | 4.57E-06 | 5.34042 | 0.43422835 | 0.688378465 | -0.254 |
| cg21122199 | II | 37 | 17 | 58499720 C17orf64          | 0.58 | 0.00041  | 3.39184 | 0.46073435 | 0.714828444 | -0.254 |
| cg02147126 | II | 37 | 19 | 827715 AZU1                | 0.5  | 0.00432  | 2.36443 | 0.43093269 | 0.685196176 | -0.254 |
| cg16959758 | II | 37 | 20 | 36796513                   | 0.58 | 0.00041  | 3.39184 | 0.38765268 | 0.641891455 | -0.254 |
| cg03005293 | II | 37 | 1  | 151805241 RORC             | 0.54 | 0.0014   | 2.85345 | 0.35259546 | 0.605923393 | -0.253 |
| cg16481332 | II | 37 | 7  | 2654053 IQCE;IQCE          | 0.58 | 0.00041  | 3.39184 | 0.45472075 | 0.707930563 | -0.253 |
| cg07231045 | II | 37 | 8  | 142219444                  | 0.5  | 0.00432  | 2.36443 | 0.54174809 | 0.794930636 | -0.253 |
| cg22406869 | II | 37 | 11 | 66276941 DPP3;BBS1;DPP3    | 0.58 | 0.00041  | 3.39184 | 0.42075948 | 0.673778529 | -0.253 |
| cg26164712 | II | 37 | 11 | 118754565 CXCR5;CXCR5      | 0.5  | 0.00432  | 2.36443 | 0.60755882 | 0.354840238 | 0.253  |
| cg23526087 | II | 37 | 14 | 68973466 RAD51L1           | 0.54 | 0.0014   | 2.85345 | 0.51634384 | 0.263004691 | 0.253  |
| cg20503109 | II | 37 | 17 | 74565795 ST6GALNAC2        | 0.67 | 2.34E-05 | 4.63072 | 0.40776301 | 0.660625065 | -0.253 |
| cg07996532 | II | 37 | 1  | 21620812 ECE1              | 0.54 | 0.0014   | 2.85345 | 0.41345776 | 0.161708462 | 0.252  |
| cg17833106 | II | 37 | 1  | 161060000 PVRL4            | 0.62 | 0.0001   | 3.98291 | 0.55179266 | 0.804170729 | -0.252 |
| cg24595152 | II | 37 | 3  | 43733831 ABHD5             | 0.54 | 0.0014   | 2.85345 | 0.46122697 | 0.712883792 | -0.252 |
| cg07493874 | I  | 37 | 5  | 1342172 CLPTM1L            | 0.42 | 0.02991  | 1.52413 | 0.70555137 | 0.453773578 | 0.252  |
| cg26004235 | II | 37 | 6  | 30656582 KIAA1949;NRM;KIA  | 0.5  | 0.00432  | 2.36443 | 0.5115559  | 0.259370647 | 0.252  |
| cg04499011 | II | 37 | 6  | 36972127 FGD2              | 0.5  | 0.00432  | 2.36443 | 0.58839879 | 0.33601596  | 0.252  |
| cg13844341 | II | 37 | 7  | 2116368 MAD1L1;MAD1L1;M    | 0.67 | 2.34E-05 | 4.63072 | 0.59732199 | 0.849467096 | -0.252 |
| cg08132858 | II | 37 | 7  | 101361395                  | 0.54 | 0.0014   | 2.85345 | 0.39306242 | 0.645346574 | -0.252 |
| cg04188920 | I  | 37 | 10 | 3138534 PFKP               | 0.54 | 0.0014   | 2.85345 | 0.36207957 | 0.61404379  | -0.252 |
| cg23615741 | I  | 37 | 10 | 101297642                  | 0.54 | 0.0014   | 2.85345 | 0.37051501 | 0.622488073 | -0.252 |
| cg08908247 | II | 37 | 11 | 66055170 YIF1A             | 0.71 | 4.57E-06 | 5.34042 | 0.38074386 | 0.632945138 | -0.252 |
| cg08163918 | II | 37 | 12 | 57628654 SHMT2;SHMT2;SHM   | 0.54 | 0.0014   | 2.85345 | 0.68056584 | 0.428695183 | 0.252  |
| cg18294707 | II | 37 | 14 | 21422965 RNASE2            | 0.5  | 0.00432  | 2.36443 | 0.45493002 | 0.707404981 | -0.252 |
| cg02240622 | II | 37 | 15 | 40601467 PLCB2             | 0.54 | 0.0014   | 2.85345 | 0.48471085 | 0.736394996 | -0.252 |
| cg08684477 | II | 37 | 16 | 87521410 ZCCHC14           | 0.67 | 2.34E-05 | 4.63072 | 0.42626199 | 0.678651718 | -0.252 |
| cg26535158 | I  | 37 | 17 | 40175841 NKIRAS2;NKIRAS2;N | 0.54 | 0.0014   | 2.85345 | 0.46618737 | 0.71787422  | -0.252 |
| cg16732654 | II | 37 | 17 | 79129022 AATK              | 0.46 | 0.01197  | 1.92207 | 0.49618032 | 0.747682819 | -0.252 |

|            |    |    |    |           |                    |      |          |         |            |             |        |
|------------|----|----|----|-----------|--------------------|------|----------|---------|------------|-------------|--------|
| cg00291213 | II | 37 | 21 | 36398056  | RUNX1              | 0.54 | 0.0014   | 2.85345 | 0.44730832 | 0.699362715 | -0.252 |
| cg11798406 | II | 37 | 21 | 40145361  | NCRNA00114         | 0.54 | 0.0014   | 2.85345 | 0.67890978 | 0.426546239 | 0.252  |
| cg26574610 | II | 37 | 22 | 24095989  | VPREB3             | 0.5  | 0.00432  | 2.36443 | 0.61752195 | 0.365222454 | 0.252  |
| cg00261690 | II | 37 | 1  | 28856281  | SNHG3-RCC1;SNHG    | 0.54 | 0.0014   | 2.85345 | 0.63284509 | 0.883498677 | -0.251 |
| cg02799411 | II | 37 | 3  | 4794061   | ITPR1;ITPR1;ITPR1; | 0.46 | 0.01197  | 1.92207 | 0.39224169 | 0.64367363  | -0.251 |
| cg12239580 | II | 37 | 3  | 43073058  | FAM198A            | 0.5  | 0.00432  | 2.36443 | 0.50620343 | 0.757128916 | -0.251 |
| cg06012804 | II | 37 | 3  | 193849318 |                    | 0.5  | 0.00432  | 2.36443 | 0.52233425 | 0.271609853 | 0.251  |
| cg12534645 | II | 37 | 5  | 149636295 | CAMK2A;CAMK2A      | 0.5  | 0.00432  | 2.36443 | 0.52872271 | 0.277549727 | 0.251  |
| cg03922146 | I  | 37 | 6  | 30656499  | KIAA1949;NRM;KIA   | 0.42 | 0.02991  | 1.52413 | 0.72149545 | 0.470035172 | 0.251  |
| cg02217713 | II | 37 | 7  | 643155    | PRKAR1B;PRKAR1B    | 0.5  | 0.00432  | 2.36443 | 0.50881644 | 0.75945558  | -0.251 |
| cg03152353 | II | 37 | 9  | 139417194 | NOTCH1             | 0.58 | 0.00041  | 3.39184 | 0.56792581 | 0.81847301  | -0.251 |
| cg19975346 | II | 37 | 10 | 126366131 | FAM53B             | 0.54 | 0.0014   | 2.85345 | 0.57604893 | 0.826973095 | -0.251 |
| cg03509949 | II | 37 | 12 | 56236869  | MMP19              | 0.54 | 0.0014   | 2.85345 | 0.51184304 | 0.763141983 | -0.251 |
| cg02212339 | I  | 37 | 17 | 3493666   | TRPV1;TRPV1;TRPV   | 0.54 | 0.0014   | 2.85345 | 0.62194754 | 0.371210566 | 0.251  |
| cg25282976 | I  | 37 | 17 | 79005047  | FLJ90757           | 0.46 | 0.01197  | 1.92207 | 0.492825   | 0.743545658 | -0.251 |
| cg01367992 | II | 37 | 1  | 160766535 | LY9;LY9            | 0.62 | 0.0001   | 3.98291 | 0.76489541 | 0.514453163 | 0.25   |
| cg22409100 | II | 37 | 2  | 40658918  | SLC8A1;SLC8A1;SLC  | 0.58 | 0.00041  | 3.39184 | 0.402817   | 0.652671013 | -0.25  |
| cg18406852 | I  | 37 | 2  | 101010769 | CHST10             | 0.62 | 0.0001   | 3.98291 | 0.7070657  | 0.45686718  | 0.25   |
| cg19114543 | II | 37 | 3  | 46996484  | CCDC12             | 0.58 | 0.00041  | 3.39184 | 0.52753058 | 0.777851564 | -0.25  |
| cg10307548 | II | 37 | 4  | 24795830  | SOD3               | 0.54 | 0.0014   | 2.85345 | 0.37659663 | 0.626587773 | -0.25  |
| cg18446110 | II | 37 | 5  | 138714654 | SLC23A1;SLC23A1    | 0.71 | 4.57E-06 | 5.34042 | 0.48111856 | 0.730712364 | -0.25  |
| cg13500819 | II | 37 | 5  | 138725400 | MGC29506           | 0.54 | 0.0014   | 2.85345 | 0.46223258 | 0.212032029 | 0.25   |
| cg05978527 | II | 37 | 6  | 30656692  | NRM;KIAA1949       | 0.5  | 0.00432  | 2.36443 | 0.58556391 | 0.335594314 | 0.25   |
| cg12481212 | II | 37 | 6  | 44020245  |                    | 0.58 | 0.00041  | 3.39184 | 0.43877323 | 0.688758837 | -0.25  |
| cg15241519 | I  | 37 | 11 | 121440892 | SORL1              | 0.5  | 0.00432  | 2.36443 | 0.58251291 | 0.332204482 | 0.25   |
| cg04440811 | II | 37 | 11 | 129817712 | PRDM10;PRDM10;I    | 0.5  | 0.00432  | 2.36443 | 0.57345627 | 0.323913512 | 0.25   |
| cg22491680 | II | 37 | 12 | 96389547  | HAL                | 0.54 | 0.0014   | 2.85345 | 0.53599978 | 0.786319545 | -0.25  |
| cg18825221 | II | 37 | 14 | 68749962  | RAD51L1;RAD51L1;   | 0.5  | 0.00432  | 2.36443 | 0.36808017 | 0.118362117 | 0.25   |
| cg10377921 | II | 37 | 19 | 15391946  | BRD4;BRD4          | 0.54 | 0.0014   | 2.85345 | 0.51806436 | 0.768134412 | -0.25  |
| cg01078772 | II | 37 | 20 | 30920486  | KIF3B              | 0.54 | 0.0014   | 2.85345 | 0.78305154 | 0.532928001 | 0.25   |
| cg15553418 | II | 37 | 1  | 16696547  | C1orf144;C1orf144  | 0.58 | 0.00041  | 3.39184 | 0.52559809 | 0.774429803 | -0.249 |
| cg21301505 | I  | 37 | 1  | 159796629 | SLAMF8;SLAMF8      | 0.5  | 0.00432  | 2.36443 | 0.43920131 | 0.687888351 | -0.249 |
| cg13172153 | II | 37 | 1  | 201391747 | TNNI1              | 0.5  | 0.00432  | 2.36443 | 0.61575867 | 0.366586653 | 0.249  |

|            |    |    |    |                            |      |         |         |            |             |        |
|------------|----|----|----|----------------------------|------|---------|---------|------------|-------------|--------|
| cg00534022 | II | 37 | 2  | 8686087                    | 0.62 | 0.0001  | 3.98291 | 0.34783167 | 0.596434533 | -0.249 |
| cg10499974 | II | 37 | 3  | 46244099 CCR1              | 0.54 | 0.0014  | 2.85345 | 0.58202516 | 0.831329242 | -0.249 |
| cg08548882 | II | 37 | 6  | 150953085 PLEKHG1          | 0.54 | 0.0014  | 2.85345 | 0.59164854 | 0.342404946 | 0.249  |
| cg15248035 | II | 37 | 9  | 36169949 CCIN              | 0.5  | 0.00432 | 2.36443 | 0.55471619 | 0.803360079 | -0.249 |
| cg13603332 | II | 37 | 9  | 108053809 SLC44A1          | 0.58 | 0.00041 | 3.39184 | 0.51377309 | 0.762451853 | -0.249 |
| cg14482811 | I  | 37 | 9  | 139652837 LCN8             | 0.54 | 0.0014  | 2.85345 | 0.6189967  | 0.369601231 | 0.249  |
| cg13761364 | II | 37 | 9  | 140325278 NOXA1            | 0.46 | 0.01197 | 1.92207 | 0.6270399  | 0.378499241 | 0.249  |
| cg26583584 | II | 37 | 11 | 75291101                   | 0.42 | 0.02991 | 1.52413 | 0.56932422 | 0.320384972 | 0.249  |
| cg18728264 | I  | 37 | 11 | 118766491 CXCR5;CXCR5;CXCR | 0.58 | 0.00041 | 3.39184 | 0.50958811 | 0.260807441 | 0.249  |
| cg10363118 | II | 37 | 12 | 116948928                  | 0.46 | 0.01197 | 1.92207 | 0.90665301 | 0.657825511 | 0.249  |
| cg01574390 | II | 37 | 16 | 21623651 METTL9;METTL9     | 0.54 | 0.0014  | 2.85345 | 0.46385194 | 0.7133413   | -0.249 |
| cg08255481 | II | 37 | 16 | 88103035 BANP;BANP         | 0.54 | 0.0014  | 2.85345 | 0.49722683 | 0.247970865 | 0.249  |
| cg02052762 | II | 37 | 17 | 4090525 ANKFY1             | 0.58 | 0.00041 | 3.39184 | 0.62102952 | 0.869607933 | -0.249 |
| cg19418318 | II | 37 | 19 | 17219073 MYO9B;MYO9B       | 0.58 | 0.00041 | 3.39184 | 0.46443504 | 0.713826924 | -0.249 |
| cg05307452 | II | 37 | 2  | 89128093                   | 0.5  | 0.00432 | 2.36443 | 0.59455296 | 0.346113168 | 0.248  |
| cg27572072 | II | 37 | 7  | 958244 ADAP1               | 0.58 | 0.00041 | 3.39184 | 0.48613759 | 0.733692151 | -0.248 |
| cg07609372 | II | 37 | 7  | 150885361 ASB10;ASB10;ASB1 | 0.46 | 0.01197 | 1.92207 | 0.56353101 | 0.315330067 | 0.248  |
| cg22325580 | II | 37 | 8  | 1899943 ARHGEF10           | 0.58 | 0.00041 | 3.39184 | 0.40429983 | 0.651911623 | -0.248 |
| cg11307715 | II | 37 | 8  | 142161887 DENND3           | 0.58 | 0.00041 | 3.39184 | 0.588753   | 0.836828211 | -0.248 |
| cg17995557 | II | 37 | 10 | 126289971 LHPP;LHPP        | 0.46 | 0.01197 | 1.92207 | 0.59230783 | 0.344597191 | 0.248  |
| cg20491695 | II | 37 | 11 | 45719826                   | 0.5  | 0.00432 | 2.36443 | 0.66736518 | 0.419573815 | 0.248  |
| cg16706613 | II | 37 | 12 | 52423671                   | 0.46 | 0.01197 | 1.92207 | 0.69924524 | 0.451138318 | 0.248  |
| cg15354065 | II | 37 | 12 | 56327217 DGKA;DGKA;DGKA;   | 0.54 | 0.0014  | 2.85345 | 0.47156247 | 0.719899811 | -0.248 |
| cg09540612 | I  | 37 | 20 | 62492233 C20orf135         | 0.58 | 0.00041 | 3.39184 | 0.4329159  | 0.680430994 | -0.248 |
| cg00992048 | II | 37 | 1  | 1695585 NADK               | 0.54 | 0.0014  | 2.85345 | 0.48273724 | 0.729372784 | -0.247 |
| cg21118486 | II | 37 | 6  | 167263225 RPS6KA2          | 0.62 | 0.0001  | 3.98291 | 0.71019106 | 0.463367161 | 0.247  |
| cg16523158 | II | 37 | 6  | 167535171 CCR6;CCR6        | 0.54 | 0.0014  | 2.85345 | 0.68274134 | 0.435690867 | 0.247  |
| cg07733719 | II | 37 | 7  | 75683547 MDH2              | 0.54 | 0.0014  | 2.85345 | 0.51412116 | 0.761530412 | -0.247 |
| cg14255337 | II | 37 | 12 | 121972602 KDM2B;KDM2B      | 0.54 | 0.0014  | 2.85345 | 0.58890872 | 0.342347464 | 0.247  |
| cg15174682 | I  | 37 | 19 | 5132063 KDM4B              | 0.58 | 0.00041 | 3.39184 | 0.58167133 | 0.335014579 | 0.247  |
| cg19358608 | II | 37 | 20 | 1924565                    | 0.54 | 0.0014  | 2.85345 | 0.58671071 | 0.833245275 | -0.247 |
| cg05753799 | II | 37 | 20 | 3746315 C20orf27           | 0.58 | 0.00041 | 3.39184 | 0.40118254 | 0.648624256 | -0.247 |
| cg16296829 | II | 37 | 1  | 154832535 KCNN3;KCNN3      | 0.5  | 0.00432 | 2.36443 | 0.46924297 | 0.223727457 | 0.246  |

|            |    |    |    |           |                   |      |          |         |            |             |        |
|------------|----|----|----|-----------|-------------------|------|----------|---------|------------|-------------|--------|
| cg24830898 | I  | 37 | 5  | 177964873 | COL23A1           | 0.62 | 0.0001   | 3.98291 | 0.61182167 | 0.858241879 | -0.246 |
| cg26575105 | II | 37 | 6  | 109010960 |                   | 0.67 | 2.34E-05 | 4.63072 | 0.57738132 | 0.822944207 | -0.246 |
| cg13410614 | II | 37 | 9  | 136341915 | SLC2A6;SLC2A6     | 0.58 | 0.00041  | 3.39184 | 0.38119304 | 0.626845328 | -0.246 |
| cg20283498 | II | 37 | 10 | 73387917  | CDH23;CDH23       | 0.54 | 0.0014   | 2.85345 | 0.37986027 | 0.62541933  | -0.246 |
| cg22241838 | II | 37 | 11 | 60680006  | TMEM109           | 0.62 | 0.0001   | 3.98291 | 0.59941573 | 0.353232069 | 0.246  |
| cg08447520 | II | 37 | 12 | 113513026 | DTX1              | 0.46 | 0.01197  | 1.92207 | 0.53056886 | 0.28454478  | 0.246  |
| cg00905101 | II | 37 | 16 | 1988798   | SEPX1             | 0.62 | 0.0001   | 3.98291 | 0.40719938 | 0.653023265 | -0.246 |
| cg00867406 | I  | 37 | 16 | 89997889  | TUBB3             | 0.54 | 0.0014   | 2.85345 | 0.73505234 | 0.489182931 | 0.246  |
| cg06559756 | II | 37 | 17 | 65464297  | PITPNC1;PITPNC1   | 0.54 | 0.0014   | 2.85345 | 0.53473426 | 0.289073493 | 0.246  |
| cg18406924 | I  | 37 | 17 | 78701257  | RPTOR;RPTOR       | 0.5  | 0.00432  | 2.36443 | 0.67247116 | 0.426572247 | 0.246  |
| cg13367406 | II | 37 | 1  | 41481683  | SLFN1;SLFN1       | 0.46 | 0.01197  | 1.92207 | 0.58715744 | 0.341986713 | 0.245  |
| cg20570464 | II | 37 | 1  | 42144398  | HIVEP3;HIVEP3     | 0.54 | 0.0014   | 2.85345 | 0.51903689 | 0.273689544 | 0.245  |
| cg19269039 | II | 37 | 1  | 111743200 | DENND2D;DENND2    | 0.54 | 0.0014   | 2.85345 | 0.40140166 | 0.646137766 | -0.245 |
| cg03730703 | II | 37 | 1  | 160173841 | PEA15             | 0.54 | 0.0014   | 2.85345 | 0.66781246 | 0.42330439  | 0.245  |
| cg20513777 | II | 37 | 2  | 238533299 |                   | 0.62 | 0.0001   | 3.98291 | 0.49221876 | 0.737615369 | -0.245 |
| cg11308319 | II | 37 | 2  | 240291426 | HDAC4             | 0.54 | 0.0014   | 2.85345 | 0.49551378 | 0.250210912 | 0.245  |
| cg05931054 | II | 37 | 6  | 11654646  |                   | 0.54 | 0.0014   | 2.85345 | 0.61897985 | 0.373627723 | 0.245  |
| cg16906346 | I  | 37 | 6  | 24646782  | KIAA0319;KIAA0319 | 0.46 | 0.01197  | 1.92207 | 0.53301733 | 0.288261676 | 0.245  |
| cg07880727 | II | 37 | 7  | 47846424  | C7orf69;PKD1L1    | 0.54 | 0.0014   | 2.85345 | 0.42631588 | 0.671734871 | -0.245 |
| cg16301004 | I  | 37 | 10 | 106082537 | ITPRIP            | 0.46 | 0.01197  | 1.92207 | 0.32335531 | 0.568814339 | -0.245 |
| cg22498365 | II | 37 | 17 | 80829028  | TBCD              | 0.5  | 0.00432  | 2.36443 | 0.5721614  | 0.327381783 | 0.245  |
| cg06655349 | II | 37 | 19 | 10332165  | S1PR2             | 0.62 | 0.0001   | 3.98291 | 0.47811129 | 0.723114109 | -0.245 |
| cg02231062 | II | 37 | 22 | 42321087  | TNFRSF13C         | 0.5  | 0.00432  | 2.36443 | 0.65890638 | 0.413527329 | 0.245  |
| cg03961551 | II | 37 | 1  | 25251730  | RUNX3;RUNX3       | 0.62 | 0.0001   | 3.98291 | 0.43971879 | 0.195932396 | 0.244  |
| cg00359365 | II | 37 | 1  | 26880547  | MIR1976;RPS6KA1;  | 0.46 | 0.01197  | 1.92207 | 0.31992462 | 0.564275336 | -0.244 |
| cg05962781 | II | 37 | 1  | 115599145 | TSPAN2            | 0.67 | 2.34E-05 | 4.63072 | 0.45598072 | 0.70006708  | -0.244 |
| cg08621778 | I  | 37 | 1  | 202102420 | ARL8A             | 0.62 | 0.0001   | 3.98291 | 0.56029939 | 0.804690518 | -0.244 |
| cg07223106 | II | 37 | 1  | 233155919 | PCNXL2            | 0.54 | 0.0014   | 2.85345 | 0.53985474 | 0.783559845 | -0.244 |
| cg11879354 | II | 37 | 6  | 159075773 | SYTL3             | 0.58 | 0.00041  | 3.39184 | 0.38623952 | 0.630062889 | -0.244 |
| cg12002745 | II | 37 | 8  | 124179875 |                   | 0.58 | 0.00041  | 3.39184 | 0.35834907 | 0.602780189 | -0.244 |
| cg08687540 | I  | 37 | 11 | 1890204   | LSP1;LSP1;LSP1    | 0.54 | 0.0014   | 2.85345 | 0.50090954 | 0.2569863   | 0.244  |
| cg00832329 | II | 37 | 14 | 105860985 | PACS2;PACS2       | 0.58 | 0.00041  | 3.39184 | 0.52140994 | 0.765122857 | -0.244 |
| cg16727774 | I  | 37 | 16 | 87958281  | CA5A              | 0.54 | 0.0014   | 2.85345 | 0.60182787 | 0.357610363 | 0.244  |

|            |    |    |    |                             |      |          |         |            |             |        |
|------------|----|----|----|-----------------------------|------|----------|---------|------------|-------------|--------|
| cg13618516 | II | 37 | 17 | 79129078 AATK               | 0.5  | 0.00432  | 2.36443 | 0.61191138 | 0.85584372  | -0.244 |
| cg22505006 | II | 37 | 1  | 154981829 ZBTB7B            | 0.54 | 0.0014   | 2.85345 | 0.49490513 | 0.737407176 | -0.243 |
| cg20847110 | II | 37 | 4  | 39482781 LOC401127          | 0.5  | 0.00432  | 2.36443 | 0.54777667 | 0.790936155 | -0.243 |
| cg08961187 | II | 37 | 6  | 37648275 MDGA1              | 0.46 | 0.01197  | 1.92207 | 0.60565079 | 0.362831725 | 0.243  |
| cg01357222 | II | 37 | 6  | 137619143                   | 0.58 | 0.00041  | 3.39184 | 0.47049328 | 0.713235238 | -0.243 |
| cg15453708 | II | 37 | 7  | 151493647 PRKAG2;PRKAG2     | 0.62 | 0.0001   | 3.98291 | 0.5547518  | 0.798243711 | -0.243 |
| cg25268422 | II | 37 | 9  | 136659313 VAV2;VAV2         | 0.46 | 0.01197  | 1.92207 | 0.616764   | 0.373954527 | 0.243  |
| cg07986469 | II | 37 | 10 | 129795003 PTPRE             | 0.54 | 0.0014   | 2.85345 | 0.53405359 | 0.777402572 | -0.243 |
| cg24049888 | I  | 37 | 11 | 111250129 POU2AF1;POU2AF1   | 0.67 | 2.34E-05 | 4.63072 | 0.35123542 | 0.10831583  | 0.243  |
| cg09586924 | II | 37 | 11 | 130032815 ST14              | 0.54 | 0.0014   | 2.85345 | 0.36368114 | 0.606183593 | -0.243 |
| cg13371705 | II | 37 | 12 | 2452955 CACNA1C;CACNA1C     | 0.54 | 0.0014   | 2.85345 | 0.48494224 | 0.727552881 | -0.243 |
| cg12024104 | II | 37 | 12 | 6662581 IFFO1;IFFO1         | 0.62 | 0.0001   | 3.98291 | 0.49528413 | 0.738273114 | -0.243 |
| cg11688093 | II | 37 | 13 | 111178359 RAB20             | 0.46 | 0.01197  | 1.92207 | 0.49089783 | 0.247836936 | 0.243  |
| cg23327851 | II | 37 | 14 | 21423684 RNASE2;RNASE2      | 0.62 | 0.0001   | 3.98291 | 0.42228117 | 0.665185984 | -0.243 |
| cg16565031 | II | 37 | 14 | 70186289                    | 0.54 | 0.0014   | 2.85345 | 0.39518664 | 0.638194642 | -0.243 |
| cg06100973 | II | 37 | 19 | 852114 ELANE                | 0.5  | 0.00432  | 2.36443 | 0.4188517  | 0.661595048 | -0.243 |
| cg19021236 | II | 37 | 22 | 18479382 MICAL3;MICAL3;MI   | 0.62 | 0.0001   | 3.98291 | 0.45340277 | 0.210143351 | 0.243  |
| cg04430911 | II | 37 | 1  | 36914349 OSCP1;OSCP1        | 0.58 | 0.00041  | 3.39184 | 0.55844943 | 0.800649504 | -0.242 |
| cg18455616 | II | 37 | 2  | 99124870 INPP4A;INPP4A;INF  | 0.54 | 0.0014   | 2.85345 | 0.56871017 | 0.810403584 | -0.242 |
| cg21554588 | II | 37 | 5  | 138720378 SLC23A1;SLC23A1   | 0.54 | 0.0014   | 2.85345 | 0.65673119 | 0.414469996 | 0.242  |
| cg22794304 | II | 37 | 5  | 169734762                   | 0.5  | 0.00432  | 2.36443 | 0.34814984 | 0.590431191 | -0.242 |
| cg00409658 | II | 37 | 6  | 138744549 NHSL1;NHSL1       | 0.67 | 2.34E-05 | 4.63072 | 0.34188049 | 0.584367815 | -0.242 |
| cg13509702 | II | 37 | 8  | 144896307 SCRIB;SCRIB;MIR93 | 0.54 | 0.0014   | 2.85345 | 0.53846901 | 0.780076726 | -0.242 |
| cg01462537 | II | 37 | 10 | 2992189                     | 0.5  | 0.00432  | 2.36443 | 0.8014089  | 0.559896451 | 0.242  |
| cg25170017 | I  | 37 | 11 | 64644487 EHD1               | 0.54 | 0.0014   | 2.85345 | 0.6958882  | 0.454312237 | 0.242  |
| cg10283505 | II | 37 | 11 | 94278912 FUT4;FUT4          | 0.58 | 0.00041  | 3.39184 | 0.55223077 | 0.794573771 | -0.242 |
| cg25616055 | II | 37 | 12 | 89638890                    | 0.42 | 0.02991  | 1.52413 | 0.39970014 | 0.641503416 | -0.242 |
| cg20666585 | II | 37 | 15 | 31523186                    | 0.5  | 0.00432  | 2.36443 | 0.57019218 | 0.327952645 | 0.242  |
| cg02135245 | II | 37 | 17 | 998711 ABR;ABR;ABR          | 0.62 | 0.0001   | 3.98291 | 0.49560422 | 0.7376487   | -0.242 |
| cg25134567 | I  | 37 | 17 | 64782369 PRKCA;MIR634       | 0.62 | 0.0001   | 3.98291 | 0.46292841 | 0.220765187 | 0.242  |
| cg04946561 | II | 37 | 19 | 4902899 ARRDC5              | 0.58 | 0.00041  | 3.39184 | 0.51399289 | 0.755653376 | -0.242 |
| cg00104562 | II | 37 | 19 | 7767229 FCER2               | 0.5  | 0.00432  | 2.36443 | 0.62100609 | 0.378819226 | 0.242  |
| cg21201401 | I  | 37 | 20 | 62367884 LIME1              | 0.58 | 0.00041  | 3.39184 | 0.32716082 | 0.084854471 | 0.242  |

|            |    |    |    |           |                   |      |          |         |            |             |        |
|------------|----|----|----|-----------|-------------------|------|----------|---------|------------|-------------|--------|
| cg13698860 | II | 37 | 22 | 43525679  | BIK               | 0.54 | 0.0014   | 2.85345 | 0.44366157 | 0.685286839 | -0.242 |
| cg01588592 | II | 37 | 1  | 157069325 | ETV3L;ETV3L       | 0.67 | 2.34E-05 | 4.63072 | 0.50987583 | 0.751157905 | -0.241 |
| cg24686551 | II | 37 | 3  | 134047274 |                   | 0.58 | 0.00041  | 3.39184 | 0.50418409 | 0.745678455 | -0.241 |
| cg01393945 | I  | 37 | 5  | 10457034  | ROPN1L            | 0.67 | 2.34E-05 | 4.63072 | 0.67025918 | 0.911566022 | -0.241 |
| cg13831136 | II | 37 | 6  | 30070342  |                   | 0.62 | 0.0001   | 3.98291 | 0.39271477 | 0.634093946 | -0.241 |
| cg06196379 | II | 37 | 6  | 41254885  | TREM1             | 0.54 | 0.0014   | 2.85345 | 0.38513248 | 0.625782432 | -0.241 |
| cg21350697 | I  | 37 | 10 | 134149366 | LRRC27;LRRC27;LRI | 0.5  | 0.00432  | 2.36443 | 0.37121228 | 0.6126349   | -0.241 |
| cg27597505 | II | 37 | 12 | 54148217  |                   | 0.58 | 0.00041  | 3.39184 | 0.63390088 | 0.393228237 | 0.241  |
| cg09841788 | II | 37 | 14 | 65213478  | SPTB              | 0.58 | 0.00041  | 3.39184 | 0.45981838 | 0.700816405 | -0.241 |
| cg02226192 | II | 37 | 16 | 89461734  | ANKRD11           | 0.54 | 0.0014   | 2.85345 | 0.53825693 | 0.779063771 | -0.241 |
| cg20682376 | II | 37 | 17 | 16875542  | TNFRSF13B         | 0.5  | 0.00432  | 2.36443 | 0.57966082 | 0.338985008 | 0.241  |
| cg27196880 | II | 37 | 17 | 40570233  | PTRF              | 0.54 | 0.0014   | 2.85345 | 0.40533794 | 0.646563922 | -0.241 |
| cg12122241 | II | 37 | 20 | 1920407   | SIRPA;SIRPA;SIRPA | 0.54 | 0.0014   | 2.85345 | 0.52601324 | 0.766847968 | -0.241 |
| cg16348358 | II | 37 | 1  | 32731477  | LCK               | 0.58 | 0.00041  | 3.39184 | 0.54646257 | 0.78638779  | -0.24  |
| cg10718614 | II | 37 | 1  | 234914480 |                   | 0.54 | 0.0014   | 2.85345 | 0.363316   | 0.603327909 | -0.24  |
| cg14016418 | II | 37 | 2  | 65065975  |                   | 0.62 | 0.0001   | 3.98291 | 0.46742327 | 0.707421319 | -0.24  |
| cg03681335 | II | 37 | 2  | 108903965 | SULT1C2;SULT1C2   | 0.5  | 0.00432  | 2.36443 | 0.54939851 | 0.789319701 | -0.24  |
| cg16785938 | II | 37 | 4  | 10022984  | SLC2A9;SLC2A9     | 0.58 | 0.00041  | 3.39184 | 0.41450745 | 0.654574138 | -0.24  |
| cg21513254 | I  | 37 | 6  | 30624502  | DHX16;DHX16       | 0.58 | 0.00041  | 3.39184 | 0.47112623 | 0.710753896 | -0.24  |
| cg17540192 | I  | 37 | 7  | 97875259  | TECPR1            | 0.54 | 0.0014   | 2.85345 | 0.6403372  | 0.880489394 | -0.24  |
| cg25932290 | II | 37 | 15 | 89939252  | LOC254559         | 0.58 | 0.00041  | 3.39184 | 0.41784171 | 0.65815013  | -0.24  |
| cg06484100 | II | 37 | 17 | 41799087  |                   | 0.67 | 2.34E-05 | 4.63072 | 0.48510324 | 0.724765729 | -0.24  |
| cg02018291 | II | 37 | 17 | 65487462  | PITPNC1;PITPNC1   | 0.58 | 0.00041  | 3.39184 | 0.56066882 | 0.800663927 | -0.24  |
| cg03318469 | II | 37 | 1  | 3710303   | LRRC47            | 0.67 | 2.34E-05 | 4.63072 | 0.32730769 | 0.566508979 | -0.239 |
| cg08456420 | II | 37 | 1  | 39570175  | MACF1             | 0.58 | 0.00041  | 3.39184 | 0.49787119 | 0.736969316 | -0.239 |
| cg22164207 | II | 37 | 1  | 152383842 | CRNN              | 0.5  | 0.00432  | 2.36443 | 0.62302991 | 0.384005546 | 0.239  |
| cg12129117 | I  | 37 | 1  | 223940656 | CAPN2;CAPN2       | 0.58 | 0.00041  | 3.39184 | 0.51949077 | 0.758970801 | -0.239 |
| cg17954142 | II | 37 | 1  | 230417096 | GALNT2            | 0.5  | 0.00432  | 2.36443 | 0.66430295 | 0.425340103 | 0.239  |
| cg08622198 | II | 37 | 1  | 239979505 | CHRM3             | 0.54 | 0.0014   | 2.85345 | 0.51947843 | 0.758763759 | -0.239 |
| cg13325231 | I  | 37 | 5  | 1342170   | CLPTM1L           | 0.46 | 0.01197  | 1.92207 | 0.68717616 | 0.448423547 | 0.239  |
| cg12684668 | II | 37 | 5  | 150403466 | GPX3              | 0.58 | 0.00041  | 3.39184 | 0.57795636 | 0.816653972 | -0.239 |
| cg11898695 | II | 37 | 6  | 42883504  | PTCRA             | 0.46 | 0.01197  | 1.92207 | 0.65310144 | 0.414117497 | 0.239  |
| cg01877450 | II | 37 | 7  | 97915802  | BRI3;BRI3         | 0.62 | 0.0001   | 3.98291 | 0.41280179 | 0.651637804 | -0.239 |

|            |    |    |    |                                  |      |          |         |            |             |        |
|------------|----|----|----|----------------------------------|------|----------|---------|------------|-------------|--------|
| cg18132262 | I  | 37 | 7  | 99971238 PILRA;PILRA;PILRA;PILRA | 0.58 | 0.00041  | 3.39184 | 0.33681542 | 0.576180452 | -0.239 |
| cg06889975 | II | 37 | 8  | 22558722                         | 0.46 | 0.01197  | 1.92207 | 0.61949232 | 0.38063679  | 0.239  |
| cg06449094 | II | 37 | 11 | 822397 PNPLA2                    | 0.58 | 0.00041  | 3.39184 | 0.58693227 | 0.825795127 | -0.239 |
| cg18415791 | II | 37 | 11 | 3178024 OSBPL5;OSBPL5;OSBPL5     | 0.54 | 0.0014   | 2.85345 | 0.56040966 | 0.799374648 | -0.239 |
| cg03626208 | II | 37 | 12 | 2443169 CACNA1C;CACNA1C          | 0.54 | 0.0014   | 2.85345 | 0.46238068 | 0.701748032 | -0.239 |
| cg02582213 | II | 37 | 16 | 89441654 ANKRD11                 | 0.46 | 0.01197  | 1.92207 | 0.73366462 | 0.494577453 | 0.239  |
| cg07353685 | II | 37 | 1  | 153536278 S100A2                 | 0.58 | 0.00041  | 3.39184 | 0.53058319 | 0.768322066 | -0.238 |
| cg06987246 | II | 37 | 7  | 6659785 ZNF853                   | 0.71 | 4.57E-06 | 5.34042 | 0.51461884 | 0.276827108 | 0.238  |
| cg12894711 | II | 37 | 7  | 43821949 BLVRA                   | 0.58 | 0.00041  | 3.39184 | 0.48545834 | 0.723411865 | -0.238 |
| cg26541218 | II | 37 | 7  | 47826387 PKD1L1                  | 0.58 | 0.00041  | 3.39184 | 0.46556223 | 0.703396235 | -0.238 |
| cg25115537 | I  | 37 | 8  | 123801352 ZHX2                   | 0.46 | 0.01197  | 1.92207 | 0.44181898 | 0.20365859  | 0.238  |
| cg00697658 | II | 37 | 8  | 145808575 KIAA1688               | 0.54 | 0.0014   | 2.85345 | 0.56335692 | 0.325681721 | 0.238  |
| cg15964132 | I  | 37 | 11 | 3175636 OSBPL5;OSBPL5;OSBPL5     | 0.54 | 0.0014   | 2.85345 | 0.57645217 | 0.814702463 | -0.238 |
| cg05949397 | II | 37 | 11 | 44976423                         | 0.58 | 0.00041  | 3.39184 | 0.52767732 | 0.765295694 | -0.238 |
| cg11268190 | II | 37 | 12 | 6442526 TNFRSF1A                 | 0.5  | 0.00432  | 2.36443 | 0.42302389 | 0.660882435 | -0.238 |
| cg09365924 | II | 37 | 12 | 53611399 RARG;RARG               | 0.58 | 0.00041  | 3.39184 | 0.35826483 | 0.595819199 | -0.238 |
| cg06317209 | II | 37 | 12 | 58210878 AVIL                    | 0.58 | 0.00041  | 3.39184 | 0.55064927 | 0.788862779 | -0.238 |
| cg04234631 | II | 37 | 16 | 8738441 C16orf68                 | 0.54 | 0.0014   | 2.85345 | 0.51806741 | 0.756526725 | -0.238 |
| cg23582644 | II | 37 | 18 | 61557687 SERPINB2;SERPINB2       | 0.62 | 0.0001   | 3.98291 | 0.6186232  | 0.856963445 | -0.238 |
| cg22501942 | II | 37 | 1  | 11798278 AGTRAP;AGTRAP;AGTRAP    | 0.54 | 0.0014   | 2.85345 | 0.34181431 | 0.578615695 | -0.237 |
| cg07625783 | II | 37 | 1  | 159796617 SLAMF8;SLAMF8          | 0.54 | 0.0014   | 2.85345 | 0.37606423 | 0.613493136 | -0.237 |
| cg24426483 | II | 37 | 2  | 20738271                         | 0.5  | 0.00432  | 2.36443 | 0.5765875  | 0.339428841 | 0.237  |
| cg20954219 | II | 37 | 2  | 29745303 ALK                     | 0.58 | 0.00041  | 3.39184 | 0.34697812 | 0.584014474 | -0.237 |
| cg22485298 | II | 37 | 6  | 30853333 DDR1;DDR1               | 0.46 | 0.01197  | 1.92207 | 0.47908943 | 0.241923136 | 0.237  |
| cg02677635 | II | 37 | 9  | 129099507 FAM125B;FAM125B        | 0.54 | 0.0014   | 2.85345 | 0.51486318 | 0.752354391 | -0.237 |
| cg11311053 | II | 37 | 12 | 124912049 NCOR2;NCOR2            | 0.62 | 0.0001   | 3.98291 | 0.58888342 | 0.826216722 | -0.237 |
| cg11792874 | II | 37 | 14 | 24014501                         | 0.62 | 0.0001   | 3.98291 | 0.41934272 | 0.656499798 | -0.237 |
| cg24361265 | I  | 37 | 15 | 44068668 ELL3                    | 0.5  | 0.00432  | 2.36443 | 0.58342181 | 0.346020828 | 0.237  |
| cg01858712 | II | 37 | 16 | 12156525 SNX29                   | 0.62 | 0.0001   | 3.98291 | 0.32841515 | 0.56515823  | -0.237 |
| cg05433111 | II | 37 | 16 | 28943232 CD19                    | 0.54 | 0.0014   | 2.85345 | 0.4905922  | 0.253502476 | 0.237  |
| cg06465011 | II | 37 | 16 | 84860871 CRISPLD2                | 0.71 | 4.57E-06 | 5.34042 | 0.45149333 | 0.688970417 | -0.237 |
| cg27586417 | II | 37 | 16 | 85577800                         | 0.5  | 0.00432  | 2.36443 | 0.5556141  | 0.792804793 | -0.237 |
| cg09076077 | II | 37 | 20 | 58630315 C20orf197               | 0.54 | 0.0014   | 2.85345 | 0.4189524  | 0.65644339  | -0.237 |

|            |    |    |    |                             |      |          |         |            |             |        |
|------------|----|----|----|-----------------------------|------|----------|---------|------------|-------------|--------|
| cg12299361 | II | 37 | 1  | 53796769                    | 0.62 | 0.0001   | 3.98291 | 0.50226317 | 0.737978188 | -0.236 |
| cg11832395 | II | 37 | 5  | 178057845                   | 0.54 | 0.0014   | 2.85345 | 0.62952217 | 0.393095255 | 0.236  |
| cg06366374 | II | 37 | 6  | 6543659 LOC285780           | 0.5  | 0.00432  | 2.36443 | 0.4181503  | 0.65419918  | -0.236 |
| cg11435441 | I  | 37 | 6  | 25027994                    | 0.62 | 0.0001   | 3.98291 | 0.75571848 | 0.51939288  | 0.236  |
| cg07076751 | II | 37 | 6  | 30647539 KIAA1949;KIAA1949  | 0.62 | 0.0001   | 3.98291 | 0.62487967 | 0.389034957 | 0.236  |
| cg17830204 | II | 37 | 7  | 99819110 GATS;GATS;GATS;G   | 0.62 | 0.0001   | 3.98291 | 0.38415372 | 0.147923071 | 0.236  |
| cg07095530 | I  | 37 | 7  | 100859728 ZNHIT1;PLOD3      | 0.58 | 0.00041  | 3.39184 | 0.56543892 | 0.801282185 | -0.236 |
| cg25526001 | II | 37 | 10 | 85939451 C10orf99           | 0.62 | 0.0001   | 3.98291 | 0.57791454 | 0.342375967 | 0.236  |
| cg21208539 | II | 37 | 11 | 93864142 PANX1              | 0.54 | 0.0014   | 2.85345 | 0.39712876 | 0.633321502 | -0.236 |
| cg06567290 | II | 37 | 11 | 118900111 SLC37A4;SLC37A4;S | 0.46 | 0.01197  | 1.92207 | 0.50176325 | 0.737971937 | -0.236 |
| cg02648589 | II | 37 | 13 | 114877260 RASA3             | 0.54 | 0.0014   | 2.85345 | 0.62121679 | 0.857226054 | -0.236 |
| cg02178957 | II | 37 | 16 | 85964200                    | 0.46 | 0.01197  | 1.92207 | 0.45699956 | 0.693081694 | -0.236 |
| cg22242539 | II | 37 | 17 | 1665220 SERPINF1            | 0.46 | 0.01197  | 1.92207 | 0.39726737 | 0.63370766  | -0.236 |
| cg12361262 | II | 37 | 17 | 36571637                    | 0.54 | 0.0014   | 2.85345 | 0.36590519 | 0.602202913 | -0.236 |
| cg11977716 | I  | 37 | 18 | 77284742 NFATC1;NFATC1;NF   | 0.71 | 4.57E-06 | 5.34042 | 0.32124792 | 0.085324644 | 0.236  |
| cg14165142 | II | 37 | 20 | 3778655 CDC25B;CDC25B;CI    | 0.62 | 0.0001   | 3.98291 | 0.52606629 | 0.28984558  | 0.236  |
| cg26300857 | II | 37 | 1  | 6142719 KCNAB2;KCNAB2       | 0.62 | 0.0001   | 3.98291 | 0.54344584 | 0.778389469 | -0.235 |
| cg18770149 | II | 37 | 1  | 149903180 MTMR11;MTMR11     | 0.58 | 0.00041  | 3.39184 | 0.60204049 | 0.837259731 | -0.235 |
| cg03836615 | II | 37 | 3  | 4856096 ITPR1;ITPR1;ITPR1   | 0.62 | 0.0001   | 3.98291 | 0.40766323 | 0.642406302 | -0.235 |
| cg21988461 | II | 37 | 4  | 88008667 AFF1;AFF1          | 0.62 | 0.0001   | 3.98291 | 0.31034533 | 0.545727984 | -0.235 |
| cg02435538 | II | 37 | 7  | 75507337 RHBDD2;RHBDD2      | 0.67 | 2.34E-05 | 4.63072 | 0.58593224 | 0.821423672 | -0.235 |
| cg04789529 | II | 37 | 8  | 25072319 DOCK5              | 0.5  | 0.00432  | 2.36443 | 0.4856637  | 0.720877098 | -0.235 |
| cg18457731 | II | 37 | 8  | 139734484 COL22A1           | 0.46 | 0.01197  | 1.92207 | 0.63180814 | 0.397179411 | 0.235  |
| cg13410764 | II | 37 | 9  | 90407888                    | 0.54 | 0.0014   | 2.85345 | 0.40491958 | 0.639758194 | -0.235 |
| cg10381771 | II | 37 | 10 | 97515398 ENTPD1;ENTPD1;EN   | 0.5  | 0.00432  | 2.36443 | 0.34139839 | 0.575933222 | -0.235 |
| cg03302822 | II | 37 | 10 | 99928067 C10orf28           | 0.46 | 0.01197  | 1.92207 | 0.59360068 | 0.359035467 | 0.235  |
| cg25934954 | II | 37 | 11 | 64567121 MAP4K2             | 0.5  | 0.00432  | 2.36443 | 0.52501283 | 0.289820466 | 0.235  |
| cg23645046 | II | 37 | 11 | 64582244                    | 0.46 | 0.01197  | 1.92207 | 0.55794091 | 0.323086564 | 0.235  |
| cg08669096 | II | 37 | 11 | 121229765                   | 0.54 | 0.0014   | 2.85345 | 0.47860574 | 0.713160083 | -0.235 |
| cg02902617 | II | 37 | 14 | 93031178 RIN3               | 0.58 | 0.00041  | 3.39184 | 0.58890669 | 0.824076349 | -0.235 |
| cg09086087 | II | 37 | 16 | 68000763 SLC12A4;SLC12A4;S  | 0.67 | 2.34E-05 | 4.63072 | 0.38797663 | 0.623017599 | -0.235 |
| cg27260684 | II | 37 | 16 | 85063742 KIAA0513           | 0.58 | 0.00041  | 3.39184 | 0.54790822 | 0.78322778  | -0.235 |
| cg22312249 | II | 37 | 17 | 72779428 TMEM104            | 0.5  | 0.00432  | 2.36443 | 0.57288487 | 0.807612437 | -0.235 |

|            |    |    |    |           |                    |      |          |         |            |             |        |
|------------|----|----|----|-----------|--------------------|------|----------|---------|------------|-------------|--------|
| cg16308790 | I  | 37 | 18 | 77225973  | NFATC1;NFATC1;NF   | 0.5  | 0.00432  | 2.36443 | 0.51065956 | 0.276069825 | 0.235  |
| cg23347094 | II | 37 | 19 | 15699028  |                    | 0.54 | 0.0014   | 2.85345 | 0.51155934 | 0.746891485 | -0.235 |
| cg02231590 | II | 37 | 2  | 231737958 | ITM2C;ITM2C;ITM2   | 0.5  | 0.00432  | 2.36443 | 0.44139037 | 0.207057738 | 0.234  |
| cg20541456 | II | 37 | 5  | 156696520 | CYFIP2;CYFIP2;CYFI | 0.46 | 0.01197  | 1.92207 | 0.27356107 | 0.50735     | -0.234 |
| cg05206633 | II | 37 | 5  | 177913434 | COL23A1            | 0.58 | 0.00041  | 3.39184 | 0.66647817 | 0.900152996 | -0.234 |
| cg21235678 | I  | 37 | 7  | 1130967   | GPER;C7orf50;GPEF  | 0.62 | 0.0001   | 3.98291 | 0.58406953 | 0.817856317 | -0.234 |
| cg24292612 | II | 37 | 8  | 6735472   | DEFB1;DEFB1        | 0.62 | 0.0001   | 3.98291 | 0.39825238 | 0.632223397 | -0.234 |
| cg15361215 | II | 37 | 10 | 120873630 | FAM45B;FAM45A      | 0.5  | 0.00432  | 2.36443 | 0.42816611 | 0.662465061 | -0.234 |
| cg24626659 | I  | 37 | 10 | 134754286 | C10orf93           | 0.54 | 0.0014   | 2.85345 | 0.83153439 | 0.597303564 | 0.234  |
| cg07194984 | II | 37 | 11 | 2128771   |                    | 0.5  | 0.00432  | 2.36443 | 0.51389785 | 0.280055486 | 0.234  |
| cg25137372 | II | 37 | 12 | 96390059  | HAL;HAL            | 0.54 | 0.0014   | 2.85345 | 0.3972378  | 0.630954656 | -0.234 |
| cg17541002 | II | 37 | 12 | 121714889 | CAMKK2;CAMKK2;C    | 0.5  | 0.00432  | 2.36443 | 0.3840179  | 0.618370346 | -0.234 |
| cg00050618 | II | 37 | 16 | 27414418  | IL21R;IL21R        | 0.67 | 2.34E-05 | 4.63072 | 0.73377753 | 0.499518182 | 0.234  |
| cg22688566 | II | 37 | 17 | 27459835  | MYO18A;MYO18A      | 0.58 | 0.00041  | 3.39184 | 0.57388679 | 0.808310349 | -0.234 |
| cg07824483 | II | 37 | 17 | 79882042  | MAFG;MAFG          | 0.67 | 2.34E-05 | 4.63072 | 0.45325429 | 0.68724945  | -0.234 |
| cg20450689 | I  | 37 | 18 | 77586147  |                    | 0.5  | 0.00432  | 2.36443 | 0.34556038 | 0.5791814   | -0.234 |
| cg24938761 | II | 37 | 19 | 2091406   | MOBKL2A            | 0.58 | 0.00041  | 3.39184 | 0.38308262 | 0.617366858 | -0.234 |
| cg20513976 | I  | 37 | 20 | 62367893  | LIME1              | 0.62 | 0.0001   | 3.98291 | 0.37884206 | 0.144946839 | 0.234  |
| cg19273683 | II | 37 | 1  | 21656047  | ECE1               | 0.71 | 4.57E-06 | 5.34042 | 0.62681555 | 0.393765775 | 0.233  |
| cg08106792 | II | 37 | 1  | 153509323 | S100A6             | 0.58 | 0.00041  | 3.39184 | 0.37014233 | 0.602713809 | -0.233 |
| cg08476244 | II | 37 | 2  | 120867222 | EPB41L5            | 0.58 | 0.00041  | 3.39184 | 0.36840689 | 0.601514897 | -0.233 |
| cg05146536 | II | 37 | 4  | 77140678  |                    | 0.58 | 0.00041  | 3.39184 | 0.32786318 | 0.56098115  | -0.233 |
| cg17390918 | II | 37 | 5  | 10502512  |                    | 0.54 | 0.0014   | 2.85345 | 0.51962139 | 0.752657882 | -0.233 |
| cg00377497 | II | 37 | 8  | 27167110  | TRIM35             | 0.67 | 2.34E-05 | 4.63072 | 0.55700795 | 0.79032845  | -0.233 |
| cg13924015 | II | 37 | 9  | 107911118 |                    | 0.54 | 0.0014   | 2.85345 | 0.62465119 | 0.391412911 | 0.233  |
| cg11276093 | II | 37 | 10 | 95123774  | MYOF;MYOF          | 0.5  | 0.00432  | 2.36443 | 0.53769634 | 0.770854517 | -0.233 |
| cg20636248 | II | 37 | 10 | 121439845 |                    | 0.62 | 0.0001   | 3.98291 | 0.42179276 | 0.654636629 | -0.233 |
| cg07143125 | II | 37 | 11 | 48110045  | PTPRJ;PTPRJ        | 0.62 | 0.0001   | 3.98291 | 0.53966452 | 0.772281331 | -0.233 |
| cg09802818 | II | 37 | 12 | 52604609  | LOC283404          | 0.5  | 0.00432  | 2.36443 | 0.52067959 | 0.754162238 | -0.233 |
| cg02420027 | II | 37 | 13 | 41632640  |                    | 0.5  | 0.00432  | 2.36443 | 0.60061706 | 0.833168439 | -0.233 |
| cg04958055 | II | 37 | 14 | 69404437  | ACTN1;ACTN1;ACTI   | 0.58 | 0.00041  | 3.39184 | 0.36445458 | 0.597668076 | -0.233 |
| cg16411445 | I  | 37 | 21 | 40145923  | NCRNA00114         | 0.46 | 0.01197  | 1.92207 | 0.67106217 | 0.43767665  | 0.233  |
| cg25821399 | II | 37 | 3  | 128997055 | C3orf37;C3orf37    | 0.54 | 0.0014   | 2.85345 | 0.55682591 | 0.324992519 | 0.232  |

|            |    |    |    |                             |      |          |         |            |             |        |
|------------|----|----|----|-----------------------------|------|----------|---------|------------|-------------|--------|
| cg26714425 | II | 37 | 5  | 10330845                    | 0.58 | 0.00041  | 3.39184 | 0.46280491 | 0.695232656 | -0.232 |
| cg16312968 | II | 37 | 6  | 6900945                     | 0.54 | 0.0014   | 2.85345 | 0.2562688  | 0.488643373 | -0.232 |
| cg04903089 | II | 37 | 6  | 32905190 HLA-DMB            | 0.5  | 0.00432  | 2.36443 | 0.30243491 | 0.534212729 | -0.232 |
| cg23169883 | I  | 37 | 10 | 72435301 ADAMTS14;ADAMT     | 0.54 | 0.0014   | 2.85345 | 0.71089481 | 0.942720175 | -0.232 |
| cg06154903 | I  | 37 | 11 | 64642558 EHD1               | 0.58 | 0.00041  | 3.39184 | 0.82359166 | 0.591216999 | 0.232  |
| cg23140706 | II | 37 | 12 | 54689278 NFE2;NFE2          | 0.54 | 0.0014   | 2.85345 | 0.49574162 | 0.727800152 | -0.232 |
| cg09552641 | II | 37 | 19 | 55173510 LILRB4;LILRB4      | 0.5  | 0.00432  | 2.36443 | 0.61637962 | 0.384226953 | 0.232  |
| cg17988326 | II | 37 | 1  | 41091703 RIMS3              | 0.54 | 0.0014   | 2.85345 | 0.53182183 | 0.301103792 | 0.231  |
| cg19024599 | II | 37 | 2  | 109886730 SH3RF3            | 0.54 | 0.0014   | 2.85345 | 0.70663552 | 0.475638595 | 0.231  |
| cg01715572 | II | 37 | 2  | 232093057 ARMC9             | 0.54 | 0.0014   | 2.85345 | 0.4969949  | 0.265896202 | 0.231  |
| cg25643229 | II | 37 | 5  | 139120209                   | 0.54 | 0.0014   | 2.85345 | 0.61591977 | 0.384962693 | 0.231  |
| cg21473545 | II | 37 | 5  | 178203432 AACSL             | 0.58 | 0.00041  | 3.39184 | 0.45224953 | 0.682964425 | -0.231 |
| cg22662844 | I  | 37 | 7  | 2116648 MAD1L1;MAD1L1;M     | 0.58 | 0.00041  | 3.39184 | 0.64904408 | 0.880014097 | -0.231 |
| cg25589371 | II | 37 | 7  | 2477790                     | 0.5  | 0.00432  | 2.36443 | 0.66024323 | 0.429197254 | 0.231  |
| cg06567596 | I  | 37 | 7  | 97832830 LMTK2              | 0.54 | 0.0014   | 2.85345 | 0.77931784 | 0.547831364 | 0.231  |
| cg17222829 | II | 37 | 11 | 70433293 SHANK2;SHANK2      | 0.5  | 0.00432  | 2.36443 | 0.47288469 | 0.703832487 | -0.231 |
| cg19260718 | II | 37 | 11 | 75989014                    | 0.46 | 0.01197  | 1.92207 | 0.60358577 | 0.372748717 | 0.231  |
| cg08830502 | II | 37 | 16 | 87588559                    | 0.54 | 0.0014   | 2.85345 | 0.56637188 | 0.797480302 | -0.231 |
| cg24777505 | II | 37 | 17 | 80829604 TBCD               | 0.5  | 0.00432  | 2.36443 | 0.62038342 | 0.389700518 | 0.231  |
| cg07805542 | I  | 37 | 1  | 9779309 PIK3CD              | 0.46 | 0.01197  | 1.92207 | 0.45817794 | 0.688455154 | -0.23  |
| cg12380764 | II | 37 | 1  | 206971195 IL19              | 0.58 | 0.00041  | 3.39184 | 0.52060803 | 0.750947759 | -0.23  |
| cg14414903 | I  | 37 | 2  | 240171712 HDAC4             | 0.54 | 0.0014   | 2.85345 | 0.40934065 | 0.639799798 | -0.23  |
| cg13303534 | II | 37 | 3  | 171261809                   | 0.62 | 0.0001   | 3.98291 | 0.49516833 | 0.725402389 | -0.23  |
| cg17304531 | II | 37 | 3  | 197401639 MIR922;KIAA0226;l | 0.5  | 0.00432  | 2.36443 | 0.58738753 | 0.357882209 | 0.23   |
| cg17229371 | II | 37 | 5  | 1485470 LPCAT1              | 0.46 | 0.01197  | 1.92207 | 0.56683081 | 0.33707045  | 0.23   |
| cg20978247 | II | 37 | 6  | 32905085 HLA-DMB            | 0.58 | 0.00041  | 3.39184 | 0.61900754 | 0.849024457 | -0.23  |
| cg07507418 | II | 37 | 6  | 42372284 TRERF1             | 0.5  | 0.00432  | 2.36443 | 0.39401864 | 0.624345176 | -0.23  |
| cg01950058 | II | 37 | 7  | 77044434 PION               | 0.46 | 0.01197  | 1.92207 | 0.70476473 | 0.474546403 | 0.23   |
| cg26426488 | II | 37 | 7  | 100461644 SLC12A9           | 0.62 | 0.0001   | 3.98291 | 0.34653991 | 0.577007187 | -0.23  |
| cg13413384 | II | 37 | 9  | 137302231 RXRA              | 0.62 | 0.0001   | 3.98291 | 0.46925941 | 0.698909219 | -0.23  |
| cg25941075 | II | 37 | 11 | 73729854                    | 0.67 | 2.34E-05 | 4.63072 | 0.51220191 | 0.742150797 | -0.23  |
| cg06559575 | II | 37 | 12 | 53490352 IGFBP6             | 0.62 | 0.0001   | 3.98291 | 0.53434284 | 0.764760052 | -0.23  |
| cg15903956 | II | 37 | 15 | 74676231                    | 0.5  | 0.00432  | 2.36443 | 0.42122821 | 0.191203821 | 0.23   |

|            |    |    |    |                             |      |          |         |            |             |        |
|------------|----|----|----|-----------------------------|------|----------|---------|------------|-------------|--------|
| cg07102368 | II | 37 | 15 | 76455848 C15orf27           | 0.54 | 0.0014   | 2.85345 | 0.36876124 | 0.598561761 | -0.23  |
| cg02596819 | II | 37 | 16 | 9045869 USP7                | 0.54 | 0.0014   | 2.85345 | 0.37230785 | 0.142405208 | 0.23   |
| cg05382012 | II | 37 | 16 | 67517841 AGRP;AGRP          | 0.5  | 0.00432  | 2.36443 | 0.58487462 | 0.814791327 | -0.23  |
| cg22153994 | II | 37 | 17 | 43484399 ARHGAP27;ARHGAI    | 0.5  | 0.00432  | 2.36443 | 0.55847463 | 0.328201915 | 0.23   |
| cg12570429 | I  | 37 | 17 | 56345839 LPO;LPO;LPO        | 0.58 | 0.00041  | 3.39184 | 0.59803225 | 0.828131784 | -0.23  |
| cg22250546 | II | 37 | 19 | 33791370 CEBPA;CEBPA        | 0.58 | 0.00041  | 3.39184 | 0.41009426 | 0.640313432 | -0.23  |
| cg18920397 | II | 37 | 1  | 160765805 LY9;LY9           | 0.67 | 2.34E-05 | 4.63072 | 0.45052406 | 0.221365268 | 0.229  |
| cg00852924 | II | 37 | 1  | 179061154 TOR3A             | 0.62 | 0.0001   | 3.98291 | 0.45937108 | 0.688694494 | -0.229 |
| cg27044455 | II | 37 | 5  | 149878183                   | 0.58 | 0.00041  | 3.39184 | 0.58985774 | 0.818556668 | -0.229 |
| cg16079645 | II | 37 | 7  | 1039875 C7orf50;C7orf50;C7  | 0.46 | 0.01197  | 1.92207 | 0.50137529 | 0.272364332 | 0.229  |
| cg17581870 | I  | 37 | 7  | 1062965 C7orf50;C7orf50;M   | 0.58 | 0.00041  | 3.39184 | 0.74127337 | 0.511958156 | 0.229  |
| cg23261443 | I  | 37 | 7  | 101596340 CUX1;CUX1;CUX1    | 0.58 | 0.00041  | 3.39184 | 0.44475178 | 0.67411526  | -0.229 |
| cg10589094 | II | 37 | 12 | 6452596 TNFRSF1A            | 0.46 | 0.01197  | 1.92207 | 0.72372025 | 0.494254169 | 0.229  |
| cg12707346 | II | 37 | 12 | 64960957                    | 0.58 | 0.00041  | 3.39184 | 0.49399987 | 0.722918211 | -0.229 |
| cg18817487 | II | 37 | 12 | 96390143 HAL                | 0.58 | 0.00041  | 3.39184 | 0.20395185 | 0.432493761 | -0.229 |
| cg03568673 | II | 37 | 13 | 20796216 GJB6;GJB6;GJB6;GJ  | 0.5  | 0.00432  | 2.36443 | 0.59287672 | 0.821598309 | -0.229 |
| cg19903805 | II | 37 | 14 | 92333771 TC2N;TC2N          | 0.67 | 2.34E-05 | 4.63072 | 0.43611657 | 0.207175121 | 0.229  |
| cg05331340 | II | 37 | 17 | 7083064 ASGR1               | 0.58 | 0.00041  | 3.39184 | 0.48401891 | 0.712983207 | -0.229 |
| cg02779913 | II | 37 | 17 | 40088680 TTC25              | 0.46 | 0.01197  | 1.92207 | 0.38131002 | 0.610546541 | -0.229 |
| cg01022219 | I  | 37 | 18 | 13641735 C18orf1;C18orf1;C1 | 0.46 | 0.01197  | 1.92207 | 0.5021322  | 0.730676524 | -0.229 |
| cg16606773 | I  | 37 | 20 | 19955806 RIN2               | 0.54 | 0.0014   | 2.85345 | 0.56698793 | 0.796143597 | -0.229 |
| cg16828576 | II | 37 | 22 | 42318379                    | 0.46 | 0.01197  | 1.92207 | 0.47105396 | 0.241630581 | 0.229  |
| cg08850169 | II | 37 | 1  | 161171469 NDUFS2;NDUFS2     | 0.58 | 0.00041  | 3.39184 | 0.52569114 | 0.753396724 | -0.228 |
| cg20806175 | II | 37 | 1  | 161186839 FCER1G            | 0.46 | 0.01197  | 1.92207 | 0.38302668 | 0.610693262 | -0.228 |
| cg17852326 | II | 37 | 1  | 221055964 HLX               | 0.54 | 0.0014   | 2.85345 | 0.43169157 | 0.659808328 | -0.228 |
| cg04245131 | II | 37 | 1  | 235133338                   | 0.79 | 1.06E-07 | 6.97389 | 0.56540596 | 0.793118311 | -0.228 |
| cg15700582 | II | 37 | 2  | 68960656 ARHGAP25;ARHGAI    | 0.67 | 2.34E-05 | 4.63072 | 0.42823307 | 0.655961896 | -0.228 |
| cg22989958 | II | 37 | 2  | 74783039 DOK1               | 0.54 | 0.0014   | 2.85345 | 0.40154654 | 0.629573917 | -0.228 |
| cg08947915 | I  | 37 | 4  | 1742463 TACC3               | 0.5  | 0.00432  | 2.36443 | 0.57493453 | 0.803390773 | -0.228 |
| cg12094903 | II | 37 | 6  | 32808689 PSMB8;PSMB8        | 0.54 | 0.0014   | 2.85345 | 0.4274796  | 0.199887222 | 0.228  |
| cg23206115 | II | 37 | 6  | 158066900 ZDHHC14;ZDHHC14   | 0.54 | 0.0014   | 2.85345 | 0.60354291 | 0.831264661 | -0.228 |
| cg18683606 | II | 37 | 7  | 100471612 SRRT;SRRT;SRRT;SR | 0.54 | 0.0014   | 2.85345 | 0.56154389 | 0.789117791 | -0.228 |
| cg22826986 | II | 37 | 8  | 11351507 BLK                | 0.46 | 0.01197  | 1.92207 | 0.52700628 | 0.298617591 | 0.228  |

|            |    |    |    |                           |      |          |         |            |             |        |
|------------|----|----|----|---------------------------|------|----------|---------|------------|-------------|--------|
| cg14422498 | II | 37 | 9  | 100639423                 | 0.58 | 0.00041  | 3.39184 | 0.3039193  | 0.531863753 | -0.228 |
| cg20618826 | II | 37 | 10 | 81148896 ZCCHC24          | 0.46 | 0.01197  | 1.92207 | 0.56640509 | 0.33800368  | 0.228  |
| cg06760238 | II | 37 | 10 | 134400036 INPP5A          | 0.58 | 0.00041  | 3.39184 | 0.34520026 | 0.573249869 | -0.228 |
| cg19733736 | II | 37 | 12 | 56115029 RDH5             | 0.46 | 0.01197  | 1.92207 | 0.54483737 | 0.77313617  | -0.228 |
| cg03919488 | II | 37 | 12 | 63179691 PPM1H            | 0.5  | 0.00432  | 2.36443 | 0.49119987 | 0.718708368 | -0.228 |
| cg15545247 | II | 37 | 12 | 123201372 GPR109B;GPR109B | 0.54 | 0.0014   | 2.85345 | 0.38300883 | 0.611113421 | -0.228 |
| cg01329756 | II | 37 | 17 | 80346912                  | 0.5  | 0.00432  | 2.36443 | 0.42871068 | 0.65677773  | -0.228 |
| cg20152841 | II | 37 | 19 | 2073190 MOBKL2A           | 0.58 | 0.00041  | 3.39184 | 0.52229498 | 0.750481877 | -0.228 |
| cg19825589 | I  | 37 | 19 | 42379710 CD79A;CD79A      | 0.67 | 2.34E-05 | 4.63072 | 0.301201   | 0.072723638 | 0.228  |
| cg01015663 | II | 37 | 1  | 23729692 TCEA3            | 0.58 | 0.00041  | 3.39184 | 0.49486998 | 0.721519379 | -0.227 |
| cg23018689 | II | 37 | 1  | 159173540 DARC            | 0.62 | 0.0001   | 3.98291 | 0.53236513 | 0.759740061 | -0.227 |
| cg07030287 | II | 37 | 2  | 242174797 HDLBP;HDLBP     | 0.58 | 0.00041  | 3.39184 | 0.37668409 | 0.603762748 | -0.227 |
| cg06677890 | II | 37 | 5  | 149887486 NDST1           | 0.62 | 0.0001   | 3.98291 | 0.25144751 | 0.478662791 | -0.227 |
| cg16674484 | II | 37 | 5  | 149887497 NDST1           | 0.5  | 0.00432  | 2.36443 | 0.3669598  | 0.593975384 | -0.227 |
| cg14021478 | I  | 37 | 6  | 33384537 CUTA;CUTA;CUTA;C | 0.67 | 2.34E-05 | 4.63072 | 0.68199928 | 0.455010517 | 0.227  |
| cg04848693 | II | 37 | 7  | 2078786 MAD1L1;MAD1L1;M   | 0.54 | 0.0014   | 2.85345 | 0.70905898 | 0.482370336 | 0.227  |
| cg03995434 | II | 37 | 7  | 141395853 KIAA1147        | 0.5  | 0.00432  | 2.36443 | 0.67911339 | 0.451690006 | 0.227  |
| cg14206140 | I  | 37 | 9  | 136303481 ADAMTS13;ADAMT  | 0.58 | 0.00041  | 3.39184 | 0.68785482 | 0.460948121 | 0.227  |
| cg01860774 | II | 37 | 14 | 64969374 ZBTB25           | 0.62 | 0.0001   | 3.98291 | 0.74571084 | 0.518923316 | 0.227  |
| cg23222617 | II | 37 | 14 | 89653143 FOXN3;FOXN3      | 0.5  | 0.00432  | 2.36443 | 0.5445906  | 0.317157053 | 0.227  |
| cg08027123 | II | 37 | 16 | 29296186                  | 0.46 | 0.01197  | 1.92207 | 0.65019505 | 0.423520254 | 0.227  |
| cg03309308 | II | 37 | 16 | 68525329                  | 0.58 | 0.00041  | 3.39184 | 0.41018848 | 0.182705182 | 0.227  |
| cg03376089 | II | 37 | 17 | 17839409 TOM1L2;TOM1L2    | 0.58 | 0.00041  | 3.39184 | 0.6029693  | 0.830240166 | -0.227 |
| cg04071967 | II | 37 | 17 | 53511321                  | 0.62 | 0.0001   | 3.98291 | 0.52491634 | 0.752292086 | -0.227 |
| cg01041239 | I  | 37 | 18 | 13222581 C18orf1;C18orf1  | 0.58 | 0.00041  | 3.39184 | 0.41266163 | 0.639645513 | -0.227 |
| cg27064845 | II | 37 | 19 | 48252623 GLTSCR2          | 0.54 | 0.0014   | 2.85345 | 0.49943717 | 0.272828345 | 0.227  |
| cg22458693 | II | 37 | 19 | 55173503 LILRB4;LILRB4    | 0.5  | 0.00432  | 2.36443 | 0.734109   | 0.50683685  | 0.227  |
| cg22874652 | II | 37 | 1  | 1107439                   | 0.58 | 0.00041  | 3.39184 | 0.51116023 | 0.285163034 | 0.226  |
| cg13440692 | II | 37 | 1  | 1186357                   | 0.5  | 0.00432  | 2.36443 | 0.65569478 | 0.429775054 | 0.226  |
| cg17494034 | II | 37 | 1  | 12513497 VPS13D;VPS13D    | 0.54 | 0.0014   | 2.85345 | 0.54486324 | 0.318435111 | 0.226  |
| cg23202722 | II | 37 | 1  | 33793808 PHC2;PHC2        | 0.54 | 0.0014   | 2.85345 | 0.49442342 | 0.720846052 | -0.226 |
| cg22119466 | II | 37 | 2  | 9331371                   | 0.54 | 0.0014   | 2.85345 | 0.43020984 | 0.656399234 | -0.226 |
| cg04864807 | I  | 37 | 2  | 121412139                 | 0.54 | 0.0014   | 2.85345 | 0.26448057 | 0.490253006 | -0.226 |

|            |    |    |    |                            |      |          |         |            |             |        |
|------------|----|----|----|----------------------------|------|----------|---------|------------|-------------|--------|
| cg20496896 | II | 37 | 3  | 46579532 LRRC2;LRRC2       | 0.67 | 2.34E-05 | 4.63072 | 0.5502266  | 0.32468251  | 0.226  |
| cg23359665 | I  | 37 | 6  | 32120907 PPT2;PRRT1;PPT2   | 0.46 | 0.01197  | 1.92207 | 0.76859753 | 0.54303236  | 0.226  |
| cg01702009 | II | 37 | 6  | 42883762 PTCRA;PTCRA       | 0.5  | 0.00432  | 2.36443 | 0.63373702 | 0.407489779 | 0.226  |
| cg00639635 | II | 37 | 6  | 143837891                  | 0.62 | 0.0001   | 3.98291 | 0.54649888 | 0.77253934  | -0.226 |
| cg15177211 | II | 37 | 7  | 75567469 POR               | 0.5  | 0.00432  | 2.36443 | 0.39505503 | 0.620605619 | -0.226 |
| cg10287786 | II | 37 | 11 | 117666000 DSCAML1          | 0.67 | 2.34E-05 | 4.63072 | 0.50391017 | 0.729570432 | -0.226 |
| cg17865265 | II | 37 | 12 | 56236845 MMP19             | 0.62 | 0.0001   | 3.98291 | 0.54708917 | 0.772817777 | -0.226 |
| cg18887769 | II | 37 | 14 | 22945181                   | 0.58 | 0.00041  | 3.39184 | 0.64567416 | 0.419357171 | 0.226  |
| cg19905757 | II | 37 | 15 | 68924127 CORO2B            | 0.46 | 0.01197  | 1.92207 | 0.52061763 | 0.294327247 | 0.226  |
| cg00970435 | II | 37 | 17 | 66380327 ARSG              | 0.46 | 0.01197  | 1.92207 | 0.40918317 | 0.635461803 | -0.226 |
| cg16638580 | II | 37 | 19 | 39890911 MED29             | 0.5  | 0.00432  | 2.36443 | 0.62829898 | 0.402717833 | 0.226  |
| cg05305327 | II | 37 | 20 | 32156436 CBFA2T2;CBFA2T2;  | 0.5  | 0.00432  | 2.36443 | 0.61412019 | 0.388120585 | 0.226  |
| cg00446123 | I  | 37 | 20 | 62367888 LIME1             | 0.67 | 2.34E-05 | 4.63072 | 0.35530816 | 0.129075053 | 0.226  |
| cg17571559 | II | 37 | 3  | 11267525 HRH1;HRH1;HRH1    | 0.58 | 0.00041  | 3.39184 | 0.49991343 | 0.72494548  | -0.225 |
| cg06300880 | II | 37 | 3  | 119279147 CD80             | 0.46 | 0.01197  | 1.92207 | 0.7662906  | 0.541530817 | 0.225  |
| cg25752703 | I  | 37 | 3  | 128710390 KIAA1257         | 0.54 | 0.0014   | 2.85345 | 0.64988541 | 0.874392377 | -0.225 |
| cg23344523 | II | 37 | 6  | 160380572                  | 0.58 | 0.00041  | 3.39184 | 0.5764446  | 0.801683246 | -0.225 |
| cg13650156 | II | 37 | 7  | 99970502 PILRA;PILRA;PILRA | 0.58 | 0.00041  | 3.39184 | 0.5322414  | 0.757086561 | -0.225 |
| cg17433678 | II | 37 | 10 | 3135764 PFKP               | 0.5  | 0.00432  | 2.36443 | 0.51982974 | 0.745283071 | -0.225 |
| cg08181251 | II | 37 | 10 | 99443455 AVPI1             | 0.42 | 0.02991  | 1.52413 | 0.32367324 | 0.548387231 | -0.225 |
| cg19160629 | II | 37 | 11 | 116742145 SIK3             | 0.67 | 2.34E-05 | 4.63072 | 0.33939251 | 0.564127833 | -0.225 |
| cg06738887 | II | 37 | 15 | 60688010 ANXA2;ANXA2;ANX   | 0.5  | 0.00432  | 2.36443 | 0.39429341 | 0.618944149 | -0.225 |
| cg01666796 | I  | 37 | 15 | 70364327 TLE3;TLE3;TLE3    | 0.5  | 0.00432  | 2.36443 | 0.71004549 | 0.485066083 | 0.225  |
| cg01735277 | II | 37 | 15 | 75077691 CSK;CSK           | 0.62 | 0.0001   | 3.98291 | 0.51472256 | 0.290126428 | 0.225  |
| cg14023999 | I  | 37 | 15 | 90543224                   | 0.54 | 0.0014   | 2.85345 | 0.65990566 | 0.884502718 | -0.225 |
| cg03919650 | II | 37 | 16 | 3306855 MEFV               | 0.62 | 0.0001   | 3.98291 | 0.3558481  | 0.581137375 | -0.225 |
| cg09577144 | I  | 37 | 17 | 76573499 DNAH17            | 0.54 | 0.0014   | 2.85345 | 0.52522953 | 0.300046098 | 0.225  |
| cg02348449 | II | 37 | 19 | 58630429 ZSCAN18;ZSCAN18   | 0.54 | 0.0014   | 2.85345 | 0.51817514 | 0.742883104 | -0.225 |
| cg22281206 | II | 37 | 22 | 31522176 INPP5J            | 0.46 | 0.01197  | 1.92207 | 0.60143378 | 0.376007799 | 0.225  |
| cg02847588 | II | 37 | 1  | 8271997                    | 0.58 | 0.00041  | 3.39184 | 0.38916476 | 0.613318594 | -0.224 |
| cg24400630 | I  | 37 | 1  | 89728035 GBP5;GBP5         | 0.54 | 0.0014   | 2.85345 | 0.62649323 | 0.850058778 | -0.224 |
| cg00405190 | II | 37 | 2  | 175545838 WIPF1            | 0.58 | 0.00041  | 3.39184 | 0.61492978 | 0.839268238 | -0.224 |
| cg03025465 | II | 37 | 3  | 141163704 ZBTB38           | 0.58 | 0.00041  | 3.39184 | 0.56967117 | 0.793833557 | -0.224 |

|            |    |    |    |                             |      |          |         |            |             |        |
|------------|----|----|----|-----------------------------|------|----------|---------|------------|-------------|--------|
| cg01211396 | II | 37 | 6  | 30624478 DHX16;DHX16        | 0.58 | 0.00041  | 3.39184 | 0.57769832 | 0.801964491 | -0.224 |
| cg02445907 | II | 37 | 6  | 36294404 C6orf222           | 0.5  | 0.00432  | 2.36443 | 0.55771753 | 0.333892084 | 0.224  |
| cg15527515 | II | 37 | 14 | 23630709 SLC7A8             | 0.58 | 0.00041  | 3.39184 | 0.52330899 | 0.74714056  | -0.224 |
| cg01758575 | II | 37 | 16 | 28943288 CD19;CD19          | 0.5  | 0.00432  | 2.36443 | 0.53274673 | 0.308430388 | 0.224  |
| cg06857116 | II | 37 | 17 | 15885326 ZSWIM7;ZSWIM7      | 0.54 | 0.0014   | 2.85345 | 0.60104772 | 0.825041096 | -0.224 |
| cg23990942 | II | 37 | 19 | 40946878 SERTAD3;SERTAD3    | 0.58 | 0.00041  | 3.39184 | 0.47927167 | 0.703121834 | -0.224 |
| cg06291107 | II | 37 | 20 | 36157675 BLCAP;BLCAP        | 0.67 | 2.34E-05 | 4.63072 | 0.51941002 | 0.743564993 | -0.224 |
| cg15078958 | II | 37 | 1  | 10997656                    | 0.54 | 0.0014   | 2.85345 | 0.47463195 | 0.252080152 | 0.223  |
| cg00913954 | II | 37 | 1  | 36852956 STK40              | 0.54 | 0.0014   | 2.85345 | 0.54776665 | 0.770945468 | -0.223 |
| cg15830864 | II | 37 | 1  | 44877749 RNF220             | 0.58 | 0.00041  | 3.39184 | 0.59614785 | 0.818862138 | -0.223 |
| cg00785482 | II | 37 | 1  | 208058986                   | 0.58 | 0.00041  | 3.39184 | 0.63016209 | 0.853042338 | -0.223 |
| cg05415606 | II | 37 | 2  | 38357299 C2orf58            | 0.62 | 0.0001   | 3.98291 | 0.3949771  | 0.618308134 | -0.223 |
| cg05758467 | II | 37 | 2  | 240035894 HDAC4             | 0.58 | 0.00041  | 3.39184 | 0.43904724 | 0.661948409 | -0.223 |
| cg11229273 | II | 37 | 3  | 57015101 ARHGEF3            | 0.54 | 0.0014   | 2.85345 | 0.33813079 | 0.560656003 | -0.223 |
| cg15612947 | II | 37 | 5  | 14464064 TRIO               | 0.62 | 0.0001   | 3.98291 | 0.54662492 | 0.769332389 | -0.223 |
| cg05088356 | II | 37 | 5  | 66124167 MAST4;MAST4;MA     | 0.58 | 0.00041  | 3.39184 | 0.63113142 | 0.408406136 | 0.223  |
| cg00060800 | II | 37 | 5  | 141600994                   | 0.46 | 0.01197  | 1.92207 | 0.37956377 | 0.602588326 | -0.223 |
| cg21932542 | II | 37 | 7  | 4850345 RADIL               | 0.58 | 0.00041  | 3.39184 | 0.56367211 | 0.786374682 | -0.223 |
| cg04088945 | II | 37 | 7  | 157090146                   | 0.58 | 0.00041  | 3.39184 | 0.62194483 | 0.844679048 | -0.223 |
| cg01081737 | II | 37 | 8  | 142238752 SLC45A4           | 0.54 | 0.0014   | 2.85345 | 0.62995734 | 0.853339916 | -0.223 |
| cg13823257 | II | 37 | 9  | 35666823                    | 0.42 | 0.02991  | 1.52413 | 0.56592871 | 0.343254166 | 0.223  |
| cg19726711 | II | 37 | 10 | 6183872                     | 0.58 | 0.00041  | 3.39184 | 0.71659384 | 0.494029752 | 0.223  |
| cg08145373 | II | 37 | 11 | 2407008 CD81                | 0.5  | 0.00432  | 2.36443 | 0.45568248 | 0.232946936 | 0.223  |
| cg21720802 | II | 37 | 11 | 66232921 PELI3;PELI3        | 0.5  | 0.00432  | 2.36443 | 0.55823204 | 0.335468334 | 0.223  |
| cg09303642 | II | 37 | 12 | 54690818 NFE2;NFE2          | 0.54 | 0.0014   | 2.85345 | 0.44324692 | 0.666690424 | -0.223 |
| cg18020065 | I  | 37 | 13 | 114829733 RASA3             | 0.46 | 0.01197  | 1.92207 | 0.21811049 | 0.441528851 | -0.223 |
| cg07102001 | II | 37 | 16 | 87734816 LOC100129637       | 0.46 | 0.01197  | 1.92207 | 0.53794219 | 0.314637355 | 0.223  |
| cg15530560 | II | 37 | 19 | 851290 ELANE                | 0.67 | 2.34E-05 | 4.63072 | 0.46890053 | 0.691940617 | -0.223 |
| cg27340480 | II | 37 | 19 | 44170526 PLAUR;PLAUR;PLAL   | 0.54 | 0.0014   | 2.85345 | 0.64302727 | 0.86576904  | -0.223 |
| cg24898863 | II | 37 | 1  | 153363580 S100A8            | 0.58 | 0.00041  | 3.39184 | 0.32427267 | 0.546241986 | -0.222 |
| cg12275370 | II | 37 | 2  | 10425661                    | 0.67 | 2.34E-05 | 4.63072 | 0.43039447 | 0.65208085  | -0.222 |
| cg27485075 | II | 37 | 2  | 47054963 LOC100134259       | 0.5  | 0.00432  | 2.36443 | 0.53470751 | 0.312850104 | 0.222  |
| cg11963365 | II | 37 | 5  | 141320784 KIAA0141;KIAA014: | 0.5  | 0.00432  | 2.36443 | 0.5236753  | 0.745390474 | -0.222 |

|            |    |    |    |                             |      |         |         |            |             |        |
|------------|----|----|----|-----------------------------|------|---------|---------|------------|-------------|--------|
| cg02393092 | II | 37 | 9  | 131444897 SET               | 0.46 | 0.01197 | 1.92207 | 0.60094017 | 0.37908602  | 0.222  |
| cg07441944 | II | 37 | 11 | 44623459 CD82;CD82          | 0.54 | 0.0014  | 2.85345 | 0.625433   | 0.403844869 | 0.222  |
| cg01336858 | II | 37 | 15 | 70154572                    | 0.5  | 0.00432 | 2.36443 | 0.43122147 | 0.209450363 | 0.222  |
| cg00531137 | II | 37 | 16 | 57643932                    | 0.54 | 0.0014  | 2.85345 | 0.33692781 | 0.11500997  | 0.222  |
| cg05546038 | II | 37 | 16 | 67207033 NOL3               | 0.5  | 0.00432 | 2.36443 | 0.62545214 | 0.847389965 | -0.222 |
| cg03778909 | II | 37 | 17 | 80833393 TBCD               | 0.5  | 0.00432 | 2.36443 | 0.61440281 | 0.836300269 | -0.222 |
| cg21913632 | II | 37 | 21 | 46505130 ADARB1;ADARB1;A    | 0.58 | 0.00041 | 3.39184 | 0.60614369 | 0.383948026 | 0.222  |
| cg01431057 | II | 37 | 1  | 153362927 S100A8            | 0.58 | 0.00041 | 3.39184 | 0.49271314 | 0.714025619 | -0.221 |
| cg10441691 | II | 37 | 5  | 139520490                   | 0.5  | 0.00432 | 2.36443 | 0.67906094 | 0.45804752  | 0.221  |
| cg17416722 | II | 37 | 6  | 32554385 HLA-DRB1           | 0.54 | 0.0014  | 2.85345 | 0.2786362  | 0.057593226 | 0.221  |
| cg06449934 | II | 37 | 7  | 1130697 GPER;C7orf50;GPEF   | 0.58 | 0.00041 | 3.39184 | 0.47621162 | 0.697529315 | -0.221 |
| cg01618660 | I  | 37 | 9  | 100882376 TRIM14;TRIM14;TR  | 0.46 | 0.01197 | 1.92207 | 0.65414633 | 0.875458486 | -0.221 |
| cg04451770 | II | 37 | 10 | 97515372 ENTPD1;ENTPD1;E    | 0.42 | 0.02991 | 1.52413 | 0.36382393 | 0.58502832  | -0.221 |
| cg19126615 | II | 37 | 11 | 47290188 MADD;MADD;NR1      | 0.62 | 0.0001  | 3.98291 | 0.5630112  | 0.783682432 | -0.221 |
| cg05436845 | II | 37 | 11 | 65378622 MAP3K11            | 0.58 | 0.00041 | 3.39184 | 0.36778446 | 0.588331752 | -0.221 |
| cg09244312 | II | 37 | 13 | 42120657                    | 0.58 | 0.00041 | 3.39184 | 0.55221886 | 0.773703087 | -0.221 |
| cg27170268 | I  | 37 | 14 | 104171695 XRCC3;XRCC3;XRCC  | 0.54 | 0.0014  | 2.85345 | 0.44442863 | 0.665326486 | -0.221 |
| cg24595580 | II | 37 | 15 | 100890996 FLJ42289;FLJ42289 | 0.5  | 0.00432 | 2.36443 | 0.530971   | 0.751643168 | -0.221 |
| cg05105330 | I  | 37 | 16 | 85063708 KIAA0513           | 0.58 | 0.00041 | 3.39184 | 0.57633693 | 0.796974712 | -0.221 |
| cg00835825 | I  | 37 | 16 | 85608058                    | 0.58 | 0.00041 | 3.39184 | 0.71313207 | 0.934173548 | -0.221 |
| cg01565508 | II | 37 | 17 | 8869961 PIK3R5              | 0.62 | 0.0001  | 3.98291 | 0.44120365 | 0.662105727 | -0.221 |
| cg27576485 | I  | 37 | 17 | 40558063 PTRF               | 0.62 | 0.0001  | 3.98291 | 0.56798231 | 0.789274278 | -0.221 |
| cg17628249 | II | 37 | 17 | 58499854 C17orf64           | 0.46 | 0.01197 | 1.92207 | 0.53218885 | 0.753003177 | -0.221 |
| cg00274965 | I  | 37 | 21 | 34405681                    | 0.5  | 0.00432 | 2.36443 | 0.422216   | 0.20089623  | 0.221  |
| cg25139649 | II | 37 | 1  | 2165579 SKI                 | 0.5  | 0.00432 | 2.36443 | 0.47295673 | 0.692518246 | -0.22  |
| cg00619207 | II | 37 | 1  | 111743368 DENND2D           | 0.42 | 0.02991 | 1.52413 | 0.39892808 | 0.618504448 | -0.22  |
| cg07356342 | II | 37 | 1  | 161183820 NDUFS2;NDUFS2;F   | 0.54 | 0.0014  | 2.85345 | 0.63178843 | 0.851803174 | -0.22  |
| cg27293155 | II | 37 | 2  | 38044012                    | 0.54 | 0.0014  | 2.85345 | 0.66717732 | 0.887519789 | -0.22  |
| cg12177944 | I  | 37 | 3  | 129322537 PLXND1            | 0.46 | 0.01197 | 1.92207 | 0.59285981 | 0.372504285 | 0.22   |
| cg27203560 | II | 37 | 3  | 193629645                   | 0.54 | 0.0014  | 2.85345 | 0.48651591 | 0.706083007 | -0.22  |
| cg25213720 | II | 37 | 5  | 176734343 MXD3;MXD3         | 0.5  | 0.00432 | 2.36443 | 0.29023797 | 0.510033268 | -0.22  |
| cg19295314 | II | 37 | 6  | 1635640 GMDS                | 0.54 | 0.0014  | 2.85345 | 0.57219489 | 0.791915118 | -0.22  |
| cg03097134 | II | 37 | 6  | 37598264                    | 0.62 | 0.0001  | 3.98291 | 0.57717873 | 0.797398001 | -0.22  |

|            |    |    |    |           |                     |      |          |         |            |             |        |
|------------|----|----|----|-----------|---------------------|------|----------|---------|------------|-------------|--------|
| cg01980222 | II | 37 | 6  | 41130917  | TREM2;TREM2         | 0.5  | 0.00432  | 2.36443 | 0.41629312 | 0.636393695 | -0.22  |
| cg17404534 | II | 37 | 7  | 6461991   | DAGLB;DAGLB         | 0.62 | 0.0001   | 3.98291 | 0.58244595 | 0.802555294 | -0.22  |
| cg26673980 | II | 37 | 7  | 151493820 | PRKAG2;PRKAG2       | 0.67 | 2.34E-05 | 4.63072 | 0.54201215 | 0.761781191 | -0.22  |
| cg14927855 | I  | 37 | 7  | 155151427 |                     | 0.5  | 0.00432  | 2.36443 | 0.65248318 | 0.87212488  | -0.22  |
| cg24414325 | II | 37 | 12 | 56414442  | IKZF4               | 0.67 | 2.34E-05 | 4.63072 | 0.44738161 | 0.667355588 | -0.22  |
| cg09789874 | II | 37 | 12 | 125262045 |                     | 0.58 | 0.00041  | 3.39184 | 0.56507853 | 0.785431862 | -0.22  |
| cg27510257 | I  | 37 | 13 | 111305863 | CARS2               | 0.62 | 0.0001   | 3.98291 | 0.69925086 | 0.479381266 | 0.22   |
| cg01332683 | II | 37 | 16 | 16190393  | ABCC1;ABCC1;ABCC1   | 0.67 | 2.34E-05 | 4.63072 | 0.40504503 | 0.625504576 | -0.22  |
| cg08708790 | II | 37 | 16 | 22176873  |                     | 0.54 | 0.0014   | 2.85345 | 0.47759865 | 0.25716682  | 0.22   |
| cg08351131 | II | 37 | 17 | 43242591  | HEXIM2              | 0.62 | 0.0001   | 3.98291 | 0.406353   | 0.626031225 | -0.22  |
| cg23760945 | II | 37 | 19 | 11665140  | ELOF1               | 0.54 | 0.0014   | 2.85345 | 0.56599746 | 0.345806731 | 0.22   |
| cg05234415 | II | 37 | 19 | 38743744  | PPP1R14A            | 0.46 | 0.01197  | 1.92207 | 0.6168445  | 0.396741942 | 0.22   |
| cg21581845 | I  | 37 | 1  | 15127680  | KIAA1026;KIAA1026   | 0.62 | 0.0001   | 3.98291 | 0.66012781 | 0.878916485 | -0.219 |
| cg19268695 | II | 37 | 1  | 111743411 | DENND2D             | 0.46 | 0.01197  | 1.92207 | 0.43045141 | 0.649412034 | -0.219 |
| cg27304328 | II | 37 | 1  | 160519425 | CD84                | 0.46 | 0.01197  | 1.92207 | 0.54280087 | 0.324106861 | 0.219  |
| cg13464573 | II | 37 | 2  | 7172097   | RNF144A             | 0.54 | 0.0014   | 2.85345 | 0.54973968 | 0.768593159 | -0.219 |
| cg14965639 | II | 37 | 2  | 48795994  | STON1-GTF2A1L       | 0.46 | 0.01197  | 1.92207 | 0.51868377 | 0.737776395 | -0.219 |
| cg24371033 | II | 37 | 2  | 241807924 | AGXT                | 0.58 | 0.00041  | 3.39184 | 0.41353174 | 0.632843859 | -0.219 |
| cg15275312 | II | 37 | 3  | 50363059  | TUSC2               | 0.58 | 0.00041  | 3.39184 | 0.34537245 | 0.564688206 | -0.219 |
| cg27383859 | II | 37 | 3  | 122830175 | PDIA5;PDIA5         | 0.5  | 0.00432  | 2.36443 | 0.60828948 | 0.389512406 | 0.219  |
| cg00774102 | II | 37 | 6  | 31590870  | BAT2;SNORA38        | 0.54 | 0.0014   | 2.85345 | 0.51113494 | 0.730203399 | -0.219 |
| cg23254569 | II | 37 | 6  | 35451487  | TEAD3               | 0.62 | 0.0001   | 3.98291 | 0.54602194 | 0.765518285 | -0.219 |
| cg14933494 | I  | 37 | 7  | 2661902   |                     | 0.54 | 0.0014   | 2.85345 | 0.40901093 | 0.62810836  | -0.219 |
| cg15200418 | II | 37 | 7  | 4755010   | FOXK1               | 0.46 | 0.01197  | 1.92207 | 0.57627128 | 0.795365635 | -0.219 |
| cg15030712 | II | 37 | 7  | 29304984  | CHN2                | 0.54 | 0.0014   | 2.85345 | 0.40128865 | 0.620346842 | -0.219 |
| cg14089503 | II | 37 | 8  | 37755555  | RAB11FIP1;RAB11FIP1 | 0.5  | 0.00432  | 2.36443 | 0.61338025 | 0.394657046 | 0.219  |
| cg01888395 | II | 37 | 9  | 132145105 |                     | 0.62 | 0.0001   | 3.98291 | 0.60136407 | 0.820800584 | -0.219 |
| cg08726522 | II | 37 | 11 | 8739587   | ST5;ST5;ST5         | 0.54 | 0.0014   | 2.85345 | 0.35561259 | 0.575048988 | -0.219 |
| cg02049955 | II | 37 | 11 | 118045910 | SCN2B               | 0.58 | 0.00041  | 3.39184 | 0.49344005 | 0.712913423 | -0.219 |
| cg07658702 | I  | 37 | 12 | 110182938 | MGC14436;MGC14436   | 0.5  | 0.00432  | 2.36443 | 0.24006233 | 0.458734926 | -0.219 |
| cg22301418 | I  | 37 | 13 | 113514151 | ATP11A;ATP11A       | 0.67 | 2.34E-05 | 4.63072 | 0.70838738 | 0.489380815 | 0.219  |
| cg13738075 | II | 37 | 13 | 114793125 | RASA3               | 0.46 | 0.01197  | 1.92207 | 0.57608086 | 0.356637295 | 0.219  |
| cg09985344 | II | 37 | 16 | 84648441  | COTL1               | 0.54 | 0.0014   | 2.85345 | 0.76426783 | 0.545523938 | 0.219  |

|            |    |    |    |                              |      |         |         |            |             |        |
|------------|----|----|----|------------------------------|------|---------|---------|------------|-------------|--------|
| cg04444104 | I  | 37 | 16 | 89059436                     | 0.62 | 0.0001  | 3.98291 | 0.50152951 | 0.282298389 | 0.219  |
| cg14377681 | II | 37 | 17 | 37875709 ERBB2;ERBB2         | 0.5  | 0.00432 | 2.36443 | 0.5351359  | 0.754506823 | -0.219 |
| cg09380069 | II | 37 | 17 | 53847116 PCTP;PCTP           | 0.54 | 0.0014  | 2.85345 | 0.4482057  | 0.667597309 | -0.219 |
| cg03823431 | II | 37 | 17 | 79229385 SLC38A10;SLC38A1    | 0.62 | 0.0001  | 3.98291 | 0.38532938 | 0.604538778 | -0.219 |
| cg14761989 | II | 37 | 17 | 79544417 NPLOC4              | 0.58 | 0.00041 | 3.39184 | 0.39752423 | 0.616302525 | -0.219 |
| cg23357708 | II | 37 | 19 | 8580509 ZNF414;ZNF414        | 0.42 | 0.02991 | 1.52413 | 0.39351264 | 0.612158683 | -0.219 |
| cg07835236 | II | 37 | 20 | 62549301 MIR941-1;DNAJC5     | 0.46 | 0.01197 | 1.92207 | 0.6862754  | 0.466866936 | 0.219  |
| cg17923377 | II | 37 | 22 | 50174057 BRD1;LOC90834       | 0.62 | 0.0001  | 3.98291 | 0.47813003 | 0.697479153 | -0.219 |
| cg26406563 | II | 37 | 1  | 55117536 C1orf175;C1orf175   | 0.54 | 0.0014  | 2.85345 | 0.42611885 | 0.644205305 | -0.218 |
| cg25213452 | II | 37 | 1  | 206630385 SRGAP2;SRGAP2      | 0.58 | 0.00041 | 3.39184 | 0.57616385 | 0.794628899 | -0.218 |
| cg12338137 | II | 37 | 2  | 218701429 TNS1               | 0.62 | 0.0001  | 3.98291 | 0.5008352  | 0.719005175 | -0.218 |
| cg20382154 | II | 37 | 2  | 239463716                    | 0.46 | 0.01197 | 1.92207 | 0.31735583 | 0.535294658 | -0.218 |
| cg17500228 | I  | 37 | 5  | 448790 EXOC3                 | 0.62 | 0.0001  | 3.98291 | 0.68340194 | 0.90095038  | -0.218 |
| cg05876069 | II | 37 | 5  | 150020288 SYNPO;SYNPO;SYNI   | 0.54 | 0.0014  | 2.85345 | 0.41620908 | 0.634407183 | -0.218 |
| cg00970279 | I  | 37 | 6  | 31797416 HSPA1B              | 0.5  | 0.00432 | 2.36443 | 0.34279973 | 0.124384529 | 0.218  |
| cg01374870 | II | 37 | 6  | 32905127 HLA-DMB             | 0.54 | 0.0014  | 2.85345 | 0.36044205 | 0.57851774  | -0.218 |
| cg23464284 | II | 37 | 6  | 166996837 RPS6KA2;RPS6KA2    | 0.62 | 0.0001  | 3.98291 | 0.65430364 | 0.871969381 | -0.218 |
| cg23184226 | II | 37 | 7  | 97880563 TECPR1              | 0.62 | 0.0001  | 3.98291 | 0.61748187 | 0.399481582 | 0.218  |
| cg23033749 | II | 37 | 7  | 116610238 ST7;ST7            | 0.62 | 0.0001  | 3.98291 | 0.57781446 | 0.795493772 | -0.218 |
| cg10692363 | I  | 37 | 10 | 80327890                     | 0.54 | 0.0014  | 2.85345 | 0.69355429 | 0.912054257 | -0.218 |
| cg15228694 | II | 37 | 11 | 7692131 CYB5R2               | 0.62 | 0.0001  | 3.98291 | 0.63475882 | 0.852701577 | -0.218 |
| cg20645966 | II | 37 | 12 | 117131719                    | 0.5  | 0.00432 | 2.36443 | 0.53058578 | 0.312451865 | 0.218  |
| cg00872354 | II | 37 | 14 | 54080601                     | 0.5  | 0.00432 | 2.36443 | 0.47497772 | 0.256543141 | 0.218  |
| cg00736299 | I  | 37 | 16 | 4730465 MGRN1;MGRN1;M        | 0.58 | 0.00041 | 3.39184 | 0.56725338 | 0.785025248 | -0.218 |
| cg04202511 | I  | 37 | 16 | 68117991 NFATC3;NFATC3;NF    | 0.5  | 0.00432 | 2.36443 | 0.62762631 | 0.845920107 | -0.218 |
| cg08289350 | II | 37 | 17 | 74524371 CYGB                | 0.46 | 0.01197 | 1.92207 | 0.4308303  | 0.212632782 | 0.218  |
| cg15816012 | I  | 37 | 19 | 54726870 LILRB3;LILRB3;LILRE | 0.46 | 0.01197 | 1.92207 | 0.51609938 | 0.733723197 | -0.218 |
| cg06650246 | I  | 37 | 1  | 206897270 MAPKAPK2;MAPKA     | 0.58 | 0.00041 | 3.39184 | 0.39036062 | 0.607839628 | -0.217 |
| cg16967583 | II | 37 | 2  | 241807859 AGXT               | 0.5  | 0.00432 | 2.36443 | 0.41575262 | 0.633147102 | -0.217 |
| cg16945415 | II | 37 | 3  | 125980095                    | 0.54 | 0.0014  | 2.85345 | 0.32374215 | 0.540678303 | -0.217 |
| cg12670963 | II | 37 | 5  | 1511422 LPCAT1               | 0.46 | 0.01197 | 1.92207 | 0.80098739 | 0.584473839 | 0.217  |
| cg01204911 | II | 37 | 5  | 142187317 ARHGAP26;ARHGAI    | 0.46 | 0.01197 | 1.92207 | 0.46133182 | 0.677950103 | -0.217 |
| cg06625767 | II | 37 | 5  | 176836695 F12                | 0.54 | 0.0014  | 2.85345 | 0.59975105 | 0.816476326 | -0.217 |

|            |    |    |    |           |                   |      |          |         |            |             |        |
|------------|----|----|----|-----------|-------------------|------|----------|---------|------------|-------------|--------|
| cg02087075 | II | 37 | 6  | 44226395  | SLC35B2;NFKBIE    | 0.42 | 0.02991  | 1.52413 | 0.54955282 | 0.332511711 | 0.217  |
| cg12897164 | II | 37 | 8  | 124529273 | FBXO32;FBXO32     | 0.5  | 0.00432  | 2.36443 | 0.3939831  | 0.176878947 | 0.217  |
| cg24103651 | II | 37 | 10 | 113987401 |                   | 0.5  | 0.00432  | 2.36443 | 0.3711759  | 0.587844456 | -0.217 |
| cg14183540 | II | 37 | 11 | 3175007   | OSBPL5;OSBPL5;OS  | 0.58 | 0.00041  | 3.39184 | 0.43904359 | 0.655937741 | -0.217 |
| cg27652459 | II | 37 | 11 | 46709238  | ARHGAP1           | 0.67 | 2.34E-05 | 4.63072 | 0.56372375 | 0.781157105 | -0.217 |
| cg07188863 | II | 37 | 11 | 110055425 |                   | 0.62 | 0.0001   | 3.98291 | 0.46376833 | 0.681132637 | -0.217 |
| cg14102807 | II | 37 | 16 | 28943677  | CD19              | 0.42 | 0.02991  | 1.52413 | 0.54171206 | 0.324811576 | 0.217  |
| cg07396047 | II | 37 | 16 | 87735077  | LOC100129637      | 0.42 | 0.02991  | 1.52413 | 0.50049322 | 0.283206048 | 0.217  |
| cg04940329 | II | 37 | 17 | 39093054  | KRT23             | 0.46 | 0.01197  | 1.92207 | 0.50642139 | 0.723920939 | -0.217 |
| cg20925233 | II | 37 | 17 | 47661136  | NXPH3             | 0.58 | 0.00041  | 3.39184 | 0.57716794 | 0.79457657  | -0.217 |
| cg20086579 | I  | 37 | 19 | 11665102  | ELOF1             | 0.5  | 0.00432  | 2.36443 | 0.64513748 | 0.428326935 | 0.217  |
| cg06779113 | II | 37 | 1  | 228273674 | ARF1;ARF1;ARF1;AI | 0.54 | 0.0014   | 2.85345 | 0.62675545 | 0.842590801 | -0.216 |
| cg24827600 | II | 37 | 2  | 169355957 | LASS6             | 0.54 | 0.0014   | 2.85345 | 0.6392315  | 0.855535914 | -0.216 |
| cg06453088 | II | 37 | 4  | 5887725   | CRMP1;CRMP1       | 0.5  | 0.00432  | 2.36443 | 0.54531175 | 0.328928747 | 0.216  |
| cg11021317 | II | 37 | 4  | 11471730  |                   | 0.5  | 0.00432  | 2.36443 | 0.75748221 | 0.541217902 | 0.216  |
| cg22902505 | II | 37 | 4  | 81119473  | PRDM8;PRDM8       | 0.58 | 0.00041  | 3.39184 | 0.43871454 | 0.654851481 | -0.216 |
| cg00372886 | II | 37 | 6  | 30126176  | TRIM10;TRIM10     | 0.54 | 0.0014   | 2.85345 | 0.58350569 | 0.799764325 | -0.216 |
| cg12926693 | II | 37 | 6  | 36665611  |                   | 0.58 | 0.00041  | 3.39184 | 0.38135016 | 0.597763312 | -0.216 |
| cg09373037 | I  | 37 | 10 | 46970625  | SYT15;SYT15       | 0.5  | 0.00432  | 2.36443 | 0.10192109 | 0.318294367 | -0.216 |
| cg19126910 | II | 37 | 11 | 111249659 | POU2AF1           | 0.58 | 0.00041  | 3.39184 | 0.52531028 | 0.309704044 | 0.216  |
| cg19186056 | II | 37 | 11 | 113903985 |                   | 0.54 | 0.0014   | 2.85345 | 0.31353671 | 0.529746025 | -0.216 |
| cg04930596 | II | 37 | 12 | 124864528 | NCOR2;NCOR2       | 0.62 | 0.0001   | 3.98291 | 0.46377804 | 0.679386772 | -0.216 |
| cg12423658 | II | 37 | 13 | 111318555 | CARS2             | 0.58 | 0.00041  | 3.39184 | 0.54513957 | 0.760668836 | -0.216 |
| cg02315513 | II | 37 | 14 | 22974951  |                   | 0.58 | 0.00041  | 3.39184 | 0.60225592 | 0.38651713  | 0.216  |
| cg07635227 | I  | 37 | 16 | 4714815   | MGRN1;MGRN1;M     | 0.42 | 0.02991  | 1.52413 | 0.28831161 | 0.503825508 | -0.216 |
| cg26985681 | II | 37 | 16 | 15135397  | NTAN1             | 0.71 | 4.57E-06 | 5.34042 | 0.3779314  | 0.594090228 | -0.216 |
| cg10020520 | II | 37 | 16 | 30976186  | SETD1A            | 0.62 | 0.0001   | 3.98291 | 0.55953712 | 0.775433048 | -0.216 |
| cg08782002 | II | 37 | 17 | 61847885  | CCDC47            | 0.54 | 0.0014   | 2.85345 | 0.63888561 | 0.854568244 | -0.216 |
| cg04034685 | II | 37 | 17 | 62085532  | ICAM2;ICAM2;ICAM  | 0.67 | 2.34E-05 | 4.63072 | 0.5793767  | 0.795753209 | -0.216 |
| cg17846016 | II | 37 | 17 | 80181015  |                   | 0.58 | 0.00041  | 3.39184 | 0.63666081 | 0.853009177 | -0.216 |
| cg09455342 | II | 37 | 17 | 80346849  |                   | 0.58 | 0.00041  | 3.39184 | 0.59407209 | 0.810190534 | -0.216 |
| cg13076829 | II | 37 | 18 | 45530698  |                   | 0.54 | 0.0014   | 2.85345 | 0.59030403 | 0.374194632 | 0.216  |
| cg00965578 | II | 37 | 22 | 36560801  | APOL3;APOL3;APOI  | 0.46 | 0.01197  | 1.92207 | 0.30129149 | 0.517240539 | -0.216 |

|            |    |    |    |           |                  |      |          |         |            |             |        |
|------------|----|----|----|-----------|------------------|------|----------|---------|------------|-------------|--------|
| cg20633875 | II | 37 | 1  | 32572611  | KPNA6            | 0.5  | 0.00432  | 2.36443 | 0.45967676 | 0.674955018 | -0.215 |
| cg02736746 | II | 37 | 1  | 208263446 | PLXNA2           | 0.71 | 4.57E-06 | 5.34042 | 0.55461871 | 0.769908557 | -0.215 |
| cg05644602 | II | 37 | 2  | 74795186  | C2orf65          | 0.67 | 2.34E-05 | 4.63072 | 0.66126896 | 0.876765941 | -0.215 |
| cg06277638 | II | 37 | 3  | 195424838 | MIR570           | 0.67 | 2.34E-05 | 4.63072 | 0.47419857 | 0.6893443   | -0.215 |
| cg05065948 | II | 37 | 4  | 26275089  |                  | 0.54 | 0.0014   | 2.85345 | 0.60685127 | 0.82141946  | -0.215 |
| cg26913344 | II | 37 | 4  | 185872829 |                  | 0.58 | 0.00041  | 3.39184 | 0.40501752 | 0.619662556 | -0.215 |
| cg00332146 | II | 37 | 5  | 175975901 | PCDH24           | 0.46 | 0.01197  | 1.92207 | 0.28407353 | 0.499283731 | -0.215 |
| cg04569651 | II | 37 | 5  | 177956199 | COL23A1          | 0.58 | 0.00041  | 3.39184 | 0.44241447 | 0.657399433 | -0.215 |
| cg11381564 | I  | 37 | 6  | 32808619  | PSMB8;PSMB8      | 0.67 | 2.34E-05 | 4.63072 | 0.29921663 | 0.084332309 | 0.215  |
| cg17291166 | II | 37 | 6  | 37051189  |                  | 0.54 | 0.0014   | 2.85345 | 0.54185605 | 0.757193597 | -0.215 |
| cg24045212 | II | 37 | 7  | 2020131   | MAD1L1;MAD1L1;M  | 0.46 | 0.01197  | 1.92207 | 0.5809721  | 0.366312368 | 0.215  |
| cg17291423 | II | 37 | 7  | 158263204 | PTPRN2;PTPRN2;PT | 0.62 | 0.0001   | 3.98291 | 0.4448443  | 0.660077176 | -0.215 |
| cg04007350 | II | 37 | 7  | 158263221 | PTPRN2;PTPRN2;PT | 0.67 | 2.34E-05 | 4.63072 | 0.6143035  | 0.829033256 | -0.215 |
| cg07472373 | II | 37 | 10 | 50595181  | DRGX             | 0.58 | 0.00041  | 3.39184 | 0.67722392 | 0.891962918 | -0.215 |
| cg09010707 | II | 37 | 12 | 26392567  |                  | 0.5  | 0.00432  | 2.36443 | 0.46075388 | 0.675333309 | -0.215 |
| cg25808809 | II | 37 | 13 | 114917199 |                  | 0.5  | 0.00432  | 2.36443 | 0.49075758 | 0.705782437 | -0.215 |
| cg26889953 | I  | 37 | 15 | 22915992  | CYFIP1           | 0.54 | 0.0014   | 2.85345 | 0.50805056 | 0.722975965 | -0.215 |
| cg02585724 | II | 37 | 15 | 81116461  | KIAA1199         | 0.46 | 0.01197  | 1.92207 | 0.55179821 | 0.336784543 | 0.215  |
| cg13856674 | II | 37 | 15 | 93722590  |                  | 0.54 | 0.0014   | 2.85345 | 0.5120732  | 0.727434358 | -0.215 |
| cg23815491 | II | 37 | 16 | 72088622  | HP;HP            | 0.58 | 0.00041  | 3.39184 | 0.58673725 | 0.80181728  | -0.215 |
| cg09395612 | II | 37 | 16 | 86018936  |                  | 0.5  | 0.00432  | 2.36443 | 0.44026615 | 0.655410374 | -0.215 |
| cg04320476 | II | 37 | 17 | 1492206   | SLC43A2          | 0.62 | 0.0001   | 3.98291 | 0.5953078  | 0.810602483 | -0.215 |
| cg18369972 | II | 37 | 17 | 9940121   | GAS7;GAS7        | 0.58 | 0.00041  | 3.39184 | 0.4859616  | 0.701448762 | -0.215 |
| cg23948703 | II | 37 | 17 | 42928238  | EFTUD2;EFTUD2    | 0.46 | 0.01197  | 1.92207 | 0.63392988 | 0.419286553 | 0.215  |
| cg18038894 | II | 37 | 17 | 48506385  | ACSF2            | 0.54 | 0.0014   | 2.85345 | 0.6494951  | 0.864263289 | -0.215 |
| cg19879906 | I  | 37 | 19 | 16392219  |                  | 0.5  | 0.00432  | 2.36443 | 0.58380122 | 0.798554241 | -0.215 |
| cg04993279 | II | 37 | 1  | 8940460   |                  | 0.54 | 0.0014   | 2.85345 | 0.37008953 | 0.584529557 | -0.214 |
| cg15122621 | II | 37 | 1  | 156341523 | RHBG;RHBG        | 0.5  | 0.00432  | 2.36443 | 0.35126553 | 0.565763256 | -0.214 |
| cg04891053 | II | 37 | 1  | 161053558 | PVRL4            | 0.58 | 0.00041  | 3.39184 | 0.42648325 | 0.64004234  | -0.214 |
| cg04316353 | II | 37 | 6  | 38123312  |                  | 0.46 | 0.01197  | 1.92207 | 0.36404571 | 0.577713237 | -0.214 |
| cg14192130 | II | 37 | 6  | 167535764 | CCR6;CCR6        | 0.54 | 0.0014   | 2.85345 | 0.4910428  | 0.277487178 | 0.214  |
| cg09539720 | II | 37 | 7  | 150885458 | ASB10;ASB10;ASB1 | 0.58 | 0.00041  | 3.39184 | 0.3495145  | 0.135381251 | 0.214  |
| cg20657903 | II | 37 | 10 | 50387348  | C10orf128        | 0.42 | 0.02991  | 1.52413 | 0.55029046 | 0.335873953 | 0.214  |

|            |    |    |    |                            |      |          |         |            |             |        |
|------------|----|----|----|----------------------------|------|----------|---------|------------|-------------|--------|
| cg27093403 | II | 37 | 12 | 25083077 BCAT1             | 0.62 | 0.0001   | 3.98291 | 0.5810683  | 0.795121573 | -0.214 |
| cg08189198 | II | 37 | 14 | 51290136 NIN;NIN;NIN;NIN;N | 0.5  | 0.00432  | 2.36443 | 0.74665519 | 0.532896274 | 0.214  |
| cg01626885 | II | 37 | 15 | 45937757 SQRDL             | 0.58 | 0.00041  | 3.39184 | 0.38540673 | 0.599892372 | -0.214 |
| cg03901454 | II | 37 | 16 | 87588683                   | 0.58 | 0.00041  | 3.39184 | 0.45701067 | 0.670688787 | -0.214 |
| cg00227665 | II | 37 | 16 | 87735443 LOC100129637      | 0.5  | 0.00432  | 2.36443 | 0.64391251 | 0.430138853 | 0.214  |
| cg00858400 | II | 37 | 16 | 87904580 SLC7A5            | 0.54 | 0.0014   | 2.85345 | 0.6111407  | 0.825061291 | -0.214 |
| cg25112590 | I  | 37 | 17 | 3870415                    | 0.54 | 0.0014   | 2.85345 | 0.54854183 | 0.334225643 | 0.214  |
| cg05784862 | II | 37 | 17 | 25799018 KSR1              | 0.46 | 0.01197  | 1.92207 | 0.67773973 | 0.463871066 | 0.214  |
| cg25070639 | II | 37 | 17 | 41170693 VAT1              | 0.5  | 0.00432  | 2.36443 | 0.4053659  | 0.619194164 | -0.214 |
| cg12212103 | II | 37 | 17 | 48231729                   | 0.54 | 0.0014   | 2.85345 | 0.47681746 | 0.690745418 | -0.214 |
| cg14619064 | II | 37 | 17 | 56355331 MPO               | 0.58 | 0.00041  | 3.39184 | 0.62208188 | 0.836413144 | -0.214 |
| cg16131053 | II | 37 | 18 | 45459276                   | 0.62 | 0.0001   | 3.98291 | 0.38665458 | 0.600765037 | -0.214 |
| cg15200801 | II | 37 | 19 | 48999042 LMTK3             | 0.58 | 0.00041  | 3.39184 | 0.59079539 | 0.804466899 | -0.214 |
| cg07377519 | II | 37 | 19 | 50269083 AP2A1;AP2A1       | 0.58 | 0.00041  | 3.39184 | 0.32653988 | 0.540541905 | -0.214 |
| cg15033013 | II | 37 | 1  | 2082458 PRKCZ;PRKCZ;PRKC   | 0.54 | 0.0014   | 2.85345 | 0.40363864 | 0.61621949  | -0.213 |
| cg20489909 | II | 37 | 2  | 242711046                  | 0.71 | 4.57E-06 | 5.34042 | 0.37252657 | 0.585480048 | -0.213 |
| cg27516100 | II | 37 | 6  | 30624520 DHX16;DHX16       | 0.58 | 0.00041  | 3.39184 | 0.5188445  | 0.73231219  | -0.213 |
| cg14438453 | II | 37 | 6  | 39786566 DAAM2             | 0.58 | 0.00041  | 3.39184 | 0.52151914 | 0.734180461 | -0.213 |
| cg04932082 | II | 37 | 6  | 91113506                   | 0.58 | 0.00041  | 3.39184 | 0.53979814 | 0.752748492 | -0.213 |
| cg19627093 | I  | 37 | 8  | 1900892 ARHGEF10           | 0.46 | 0.01197  | 1.92207 | 0.63340259 | 0.420488735 | 0.213  |
| cg10076006 | II | 37 | 8  | 6735559 DEFB1              | 0.58 | 0.00041  | 3.39184 | 0.3714279  | 0.584573636 | -0.213 |
| cg24917065 | II | 37 | 8  | 23418389 SLC25A37          | 0.54 | 0.0014   | 2.85345 | 0.61758684 | 0.831001036 | -0.213 |
| cg07769015 | II | 37 | 8  | 142238770 SLC45A4          | 0.54 | 0.0014   | 2.85345 | 0.65932415 | 0.87276427  | -0.213 |
| cg25252561 | II | 37 | 10 | 75610927 CAMK2G;CAMK2G;    | 0.54 | 0.0014   | 2.85345 | 0.29889492 | 0.512313139 | -0.213 |
| cg04350202 | II | 37 | 10 | 111653363 XPNPEP1;XPNPEP1; | 0.54 | 0.0014   | 2.85345 | 0.63055403 | 0.843286509 | -0.213 |
| cg18169610 | II | 37 | 11 | 2415617 CD81               | 0.46 | 0.01197  | 1.92207 | 0.54929955 | 0.336465056 | 0.213  |
| cg24102222 | I  | 37 | 12 | 129280449 SLC15A4          | 0.54 | 0.0014   | 2.85345 | 0.40585318 | 0.193027329 | 0.213  |
| cg05349024 | II | 37 | 14 | 101471543                  | 0.54 | 0.0014   | 2.85345 | 0.31420544 | 0.526851804 | -0.213 |
| cg18176723 | II | 37 | 15 | 75336436 PPCDC             | 0.5  | 0.00432  | 2.36443 | 0.47134396 | 0.684659107 | -0.213 |
| cg02889001 | II | 37 | 16 | 1519785 CLCN7;CLCN7        | 0.54 | 0.0014   | 2.85345 | 0.40814185 | 0.620650296 | -0.213 |
| cg16598508 | II | 37 | 16 | 88228364                   | 0.58 | 0.00041  | 3.39184 | 0.45825159 | 0.671034836 | -0.213 |
| cg08413427 | II | 37 | 17 | 42828304 DBF4B             | 0.58 | 0.00041  | 3.39184 | 0.58834254 | 0.801082976 | -0.213 |
| cg16555866 | I  | 37 | 17 | 80830922 TBCD              | 0.58 | 0.00041  | 3.39184 | 0.63813543 | 0.425194    | 0.213  |

|            |    |    |    |                            |      |          |         |            |             |        |
|------------|----|----|----|----------------------------|------|----------|---------|------------|-------------|--------|
| cg07979271 | II | 37 | 19 | 50921353 SPIB              | 0.5  | 0.00432  | 2.36443 | 0.61901668 | 0.406289999 | 0.213  |
| cg03894068 | II | 37 | 20 | 19955537 RIN2              | 0.67 | 2.34E-05 | 4.63072 | 0.46005942 | 0.673517261 | -0.213 |
| cg25767870 | II | 37 | 1  | 118188756                  | 0.58 | 0.00041  | 3.39184 | 0.6225419  | 0.834333451 | -0.212 |
| cg05350800 | I  | 37 | 1  | 178550844                  | 0.46 | 0.01197  | 1.92207 | 0.45539446 | 0.243676162 | 0.212  |
| cg25570328 | II | 37 | 2  | 108903952 SULT1C2;SULT1C2  | 0.54 | 0.0014   | 2.85345 | 0.62759185 | 0.839591131 | -0.212 |
| cg03052004 | II | 37 | 6  | 11702389                   | 0.54 | 0.0014   | 2.85345 | 0.54098486 | 0.753033147 | -0.212 |
| cg13185046 | II | 37 | 6  | 32165321 NOTCH4            | 0.46 | 0.01197  | 1.92207 | 0.33246839 | 0.54453165  | -0.212 |
| cg23185774 | II | 37 | 6  | 36972163 FGD2              | 0.46 | 0.01197  | 1.92207 | 0.60121222 | 0.389344573 | 0.212  |
| cg08044454 | II | 37 | 7  | 37024552 ELMO1;ELMO1;ELM   | 0.62 | 0.0001   | 3.98291 | 0.42997417 | 0.64238     | -0.212 |
| cg06399735 | II | 37 | 8  | 18836280 PSD3              | 0.5  | 0.00432  | 2.36443 | 0.34456334 | 0.556824218 | -0.212 |
| cg01060444 | II | 37 | 10 | 88100354 GRID1             | 0.42 | 0.02991  | 1.52413 | 0.52627993 | 0.314515338 | 0.212  |
| cg15342452 | II | 37 | 10 | 127823065 ADAM12;ADAM12    | 0.5  | 0.00432  | 2.36443 | 0.51740733 | 0.7295624   | -0.212 |
| cg04948649 | I  | 37 | 11 | 1901748 LSP1;LSP1;LSP1;LSP | 0.58 | 0.00041  | 3.39184 | 0.5662944  | 0.778105111 | -0.212 |
| cg22212560 | II | 37 | 11 | 65175482 FRMD8             | 0.42 | 0.02991  | 1.52413 | 0.55761627 | 0.345437741 | 0.212  |
| cg26620147 | II | 37 | 12 | 58210716 AVIL              | 0.54 | 0.0014   | 2.85345 | 0.42277577 | 0.634280806 | -0.212 |
| cg03515464 | II | 37 | 14 | 101015513 BEGAIN;BEGAIN    | 0.46 | 0.01197  | 1.92207 | 0.64795492 | 0.4355544   | 0.212  |
| cg10243855 | II | 37 | 17 | 1096705                    | 0.5  | 0.00432  | 2.36443 | 0.50727717 | 0.719023518 | -0.212 |
| cg11122944 | II | 37 | 17 | 9924800 GAS7;GAS7;GAS7     | 0.54 | 0.0014   | 2.85345 | 0.34364283 | 0.555322254 | -0.212 |
| cg16896911 | II | 37 | 19 | 33895690 PEPD;PEPD;PEPD    | 0.54 | 0.0014   | 2.85345 | 0.38780522 | 0.599939817 | -0.212 |
| cg26160564 | II | 37 | 1  | 3826643 LOC100133612       | 0.5  | 0.00432  | 2.36443 | 0.45188378 | 0.241191477 | 0.211  |
| cg15030789 | II | 37 | 1  | 27438378 SLC9A1            | 0.46 | 0.01197  | 1.92207 | 0.41396023 | 0.625335526 | -0.211 |
| cg11939496 | II | 37 | 1  | 160833560 CD244;CD244;CD24 | 0.71 | 4.57E-06 | 5.34042 | 0.51793284 | 0.729219157 | -0.211 |
| cg07957995 | II | 37 | 1  | 224644750                  | 0.54 | 0.0014   | 2.85345 | 0.41954019 | 0.630735909 | -0.211 |
| cg07833951 | II | 37 | 1  | 234891473                  | 0.54 | 0.0014   | 2.85345 | 0.42136327 | 0.632531714 | -0.211 |
| cg07729527 | II | 37 | 2  | 174889845                  | 0.46 | 0.01197  | 1.92207 | 0.42360229 | 0.63457742  | -0.211 |
| cg07038243 | II | 37 | 5  | 149868855                  | 0.54 | 0.0014   | 2.85345 | 0.34016074 | 0.550803369 | -0.211 |
| cg19988490 | II | 37 | 6  | 30167065 TRIM26            | 0.54 | 0.0014   | 2.85345 | 0.33077562 | 0.541980897 | -0.211 |
| cg11748260 | II | 37 | 6  | 30624395 DHX16;DHX16       | 0.62 | 0.0001   | 3.98291 | 0.41761149 | 0.628322287 | -0.211 |
| cg14078070 | II | 37 | 6  | 167051518 RPS6KA2          | 0.5  | 0.00432  | 2.36443 | 0.53624107 | 0.3257272   | 0.211  |
| cg23386895 | II | 37 | 11 | 65083974 CDC42EP2          | 0.62 | 0.0001   | 3.98291 | 0.59831188 | 0.809704132 | -0.211 |
| cg02929855 | II | 37 | 12 | 1922067 CACNA2D4           | 0.5  | 0.00432  | 2.36443 | 0.50438705 | 0.715029724 | -0.211 |
| cg04103645 | II | 37 | 13 | 51898948                   | 0.42 | 0.02991  | 1.52413 | 0.54504983 | 0.33450643  | 0.211  |
| cg27340723 | I  | 37 | 16 | 4061608 ADCY9              | 0.67 | 2.34E-05 | 4.63072 | 0.69047457 | 0.901163584 | -0.211 |

|            |    |    |    |                             |      |          |         |            |             |        |
|------------|----|----|----|-----------------------------|------|----------|---------|------------|-------------|--------|
| cg04264560 | II | 37 | 16 | 27125068                    | 0.5  | 0.00432  | 2.36443 | 0.47026377 | 0.259733138 | 0.211  |
| cg12111500 | II | 37 | 21 | 44863962                    | 0.46 | 0.01197  | 1.92207 | 0.55508051 | 0.344504393 | 0.211  |
| cg09208331 | II | 37 | 21 | 44864004                    | 0.5  | 0.00432  | 2.36443 | 0.52157672 | 0.310244277 | 0.211  |
| cg14220262 | II | 37 | 1  | 1114963 TTLL10;TTLL10       | 0.5  | 0.00432  | 2.36443 | 0.48843378 | 0.278098559 | 0.21   |
| cg22677556 | II | 37 | 1  | 12238390 TNFRSF1B           | 0.5  | 0.00432  | 2.36443 | 0.45712235 | 0.666853576 | -0.21  |
| cg23691781 | II | 37 | 1  | 28212827 C1orf38;C1orf38;C1 | 0.46 | 0.01197  | 1.92207 | 0.45578553 | 0.66551314  | -0.21  |
| cg24681307 | II | 37 | 1  | 110526191 AHCYL1            | 0.62 | 0.0001   | 3.98291 | 0.50547553 | 0.715319063 | -0.21  |
| cg21195376 | II | 37 | 1  | 204449827 PIK3C2B           | 0.5  | 0.00432  | 2.36443 | 0.41813616 | 0.208622735 | 0.21   |
| cg13429095 | II | 37 | 1  | 206913187                   | 0.54 | 0.0014   | 2.85345 | 0.3808004  | 0.170592828 | 0.21   |
| cg21241410 | II | 37 | 2  | 43267816                    | 0.5  | 0.00432  | 2.36443 | 0.36888077 | 0.578877603 | -0.21  |
| cg09308580 | II | 37 | 2  | 43405947                    | 0.67 | 2.34E-05 | 4.63072 | 0.41310364 | 0.623237635 | -0.21  |
| cg05242065 | II | 37 | 2  | 85060011 C2orf89            | 0.54 | 0.0014   | 2.85345 | 0.62625872 | 0.835880068 | -0.21  |
| cg11051295 | II | 37 | 4  | 185876283                   | 0.5  | 0.00432  | 2.36443 | 0.68898053 | 0.478879912 | 0.21   |
| cg16478536 | I  | 37 | 6  | 408730 IRF4                 | 0.46 | 0.01197  | 1.92207 | 0.23420939 | 0.444666624 | -0.21  |
| cg23280720 | II | 37 | 6  | 139483193 HECA              | 0.75 | 7.61E-07 | 6.11857 | 0.48185426 | 0.271783491 | 0.21   |
| cg18332229 | II | 37 | 7  | 971130 ADAP1                | 0.58 | 0.00041  | 3.39184 | 0.51747224 | 0.727227738 | -0.21  |
| cg16735495 | II | 37 | 7  | 105690812                   | 0.58 | 0.00041  | 3.39184 | 0.54317771 | 0.7535085   | -0.21  |
| cg21764708 | II | 37 | 7  | 151493629 PRKAG2;PRKAG2     | 0.62 | 0.0001   | 3.98291 | 0.58951834 | 0.799602113 | -0.21  |
| cg17117981 | I  | 37 | 8  | 144410972 TOP1MT            | 0.42 | 0.02991  | 1.52413 | 0.50619506 | 0.716245416 | -0.21  |
| cg25587233 | II | 37 | 9  | 131872005 CRAT;CRAT;PPP2R4  | 0.58 | 0.00041  | 3.39184 | 0.37130337 | 0.581754248 | -0.21  |
| cg05934015 | I  | 37 | 12 | 129280265 SLC15A4           | 0.46 | 0.01197  | 1.92207 | 0.80912363 | 0.598685129 | 0.21   |
| cg23237276 | II | 37 | 14 | 101827449                   | 0.46 | 0.01197  | 1.92207 | 0.41717449 | 0.207031936 | 0.21   |
| cg08842616 | II | 37 | 16 | 70733772 VAC14              | 0.58 | 0.00041  | 3.39184 | 0.57448731 | 0.784896207 | -0.21  |
| cg00471368 | II | 37 | 16 | 81817629 PLCG2              | 0.54 | 0.0014   | 2.85345 | 0.74467946 | 0.53474766  | 0.21   |
| cg00473501 | II | 37 | 17 | 56354594 MPO                | 0.54 | 0.0014   | 2.85345 | 0.54744218 | 0.757222998 | -0.21  |
| cg13533061 | II | 37 | 17 | 74712429 JMJD6              | 0.42 | 0.02991  | 1.52413 | 0.44084078 | 0.650650677 | -0.21  |
| cg03330678 | II | 37 | 17 | 75316233 SEPT9;SEPT9;SEPT9  | 0.5  | 0.00432  | 2.36443 | 0.36319868 | 0.5728322   | -0.21  |
| cg01791634 | II | 37 | 17 | 76130139 TMC8               | 0.54 | 0.0014   | 2.85345 | 0.39829034 | 0.187795661 | 0.21   |
| cg20317872 | II | 37 | 1  | 111743202 DENND2D;DENND2    | 0.54 | 0.0014   | 2.85345 | 0.48614436 | 0.695433483 | -0.209 |
| cg01741999 | I  | 37 | 2  | 219137824 PNKD              | 0.5  | 0.00432  | 2.36443 | 0.53708914 | 0.328473399 | 0.209  |
| cg26395694 | II | 37 | 3  | 4783306 ITPR1;ITPR1;ITPR1   | 0.67 | 2.34E-05 | 4.63072 | 0.23271173 | 0.442128295 | -0.209 |
| cg02494703 | II | 37 | 11 | 64659387 MIR194-2;MIR192    | 0.5  | 0.00432  | 2.36443 | 0.51073563 | 0.301870633 | 0.209  |
| cg16449084 | II | 37 | 11 | 67069814 SSH3;ANKRD13D;AI   | 0.58 | 0.00041  | 3.39184 | 0.42538865 | 0.634806728 | -0.209 |

|            |    |    |    |                            |      |          |         |            |             |        |
|------------|----|----|----|----------------------------|------|----------|---------|------------|-------------|--------|
| cg20184271 | II | 37 | 12 | 14413090                   | 0.54 | 0.0014   | 2.85345 | 0.42672079 | 0.636172481 | -0.209 |
| cg05169499 | II | 37 | 12 | 52673946                   | 0.62 | 0.0001   | 3.98291 | 0.4551569  | 0.663949064 | -0.209 |
| cg17230002 | II | 37 | 12 | 54689504 NFE2;NFE2;NFE2    | 0.54 | 0.0014   | 2.85345 | 0.61464966 | 0.823250049 | -0.209 |
| cg04853218 | II | 37 | 14 | 55769688 FBXO34;FBXO34     | 0.62 | 0.0001   | 3.98291 | 0.53477808 | 0.744068151 | -0.209 |
| cg08368934 | II | 37 | 16 | 57701455 GPR97             | 0.62 | 0.0001   | 3.98291 | 0.50408773 | 0.71309397  | -0.209 |
| cg07512993 | II | 37 | 16 | 66582592 TK2               | 0.67 | 2.34E-05 | 4.63072 | 0.53504899 | 0.744530828 | -0.209 |
| cg05246522 | II | 37 | 17 | 25798973 KSR1              | 0.54 | 0.0014   | 2.85345 | 0.70250964 | 0.493152945 | 0.209  |
| cg12131208 | I  | 37 | 17 | 58499700 C17orf64          | 0.54 | 0.0014   | 2.85345 | 0.65709865 | 0.866496083 | -0.209 |
| cg27262850 | II | 37 | 18 | 74826769 MBP;MBP           | 0.67 | 2.34E-05 | 4.63072 | 0.32099359 | 0.529861916 | -0.209 |
| cg22023664 | II | 37 | 19 | 2619608 GNG7               | 0.54 | 0.0014   | 2.85345 | 0.53022073 | 0.738998165 | -0.209 |
| cg24414363 | II | 37 | 22 | 42336273 CENPM;CENPM;CEI   | 0.54 | 0.0014   | 2.85345 | 0.41045912 | 0.201592776 | 0.209  |
| cg20061654 | I  | 37 | 22 | 45608492 C22orf9;C22orf9   | 0.58 | 0.00041  | 3.39184 | 0.73180626 | 0.941292556 | -0.209 |
| cg12279968 | I  | 37 | 1  | 3826425 LOC100133612       | 0.54 | 0.0014   | 2.85345 | 0.78104683 | 0.573177685 | 0.208  |
| cg03945538 | II | 37 | 1  | 173447427 PRDX6            | 0.75 | 7.61E-07 | 6.11857 | 0.27029148 | 0.478035953 | -0.208 |
| cg13584784 | I  | 37 | 6  | 30619190 C6orf136;C6orf136 | 0.54 | 0.0014   | 2.85345 | 0.68577011 | 0.478150933 | 0.208  |
| cg00226923 | II | 37 | 6  | 36972027 FGD2              | 0.5  | 0.00432  | 2.36443 | 0.53481868 | 0.3266343   | 0.208  |
| cg17977099 | II | 37 | 7  | 73001879                   | 0.62 | 0.0001   | 3.98291 | 0.56252707 | 0.770155452 | -0.208 |
| cg18929814 | I  | 37 | 7  | 97875293 TECPR1            | 0.54 | 0.0014   | 2.85345 | 0.62009435 | 0.828397423 | -0.208 |
| cg14512326 | II | 37 | 9  | 86240166 C9orf103          | 0.5  | 0.00432  | 2.36443 | 0.64848898 | 0.856490164 | -0.208 |
| cg18065599 | II | 37 | 11 | 47968995                   | 0.54 | 0.0014   | 2.85345 | 0.36861089 | 0.576218965 | -0.208 |
| cg06341100 | II | 37 | 11 | 68138908 LRP5              | 0.46 | 0.01197  | 1.92207 | 0.70953655 | 0.50198484  | 0.208  |
| cg24520862 | II | 37 | 11 | 75943228                   | 0.54 | 0.0014   | 2.85345 | 0.43463298 | 0.226255597 | 0.208  |
| cg20533957 | II | 37 | 11 | 94278538 FUT4              | 0.54 | 0.0014   | 2.85345 | 0.45480259 | 0.663185688 | -0.208 |
| cg22274234 | II | 37 | 12 | 109888858 KCTD10           | 0.5  | 0.00432  | 2.36443 | 0.41880748 | 0.627204389 | -0.208 |
| cg27180555 | II | 37 | 12 | 112822378                  | 0.58 | 0.00041  | 3.39184 | 0.5748538  | 0.782951304 | -0.208 |
| cg07152597 | II | 37 | 14 | 106152163                  | 0.54 | 0.0014   | 2.85345 | 0.74054231 | 0.53270108  | 0.208  |
| cg04709771 | II | 37 | 16 | 646395 RAB40C              | 0.54 | 0.0014   | 2.85345 | 0.39408247 | 0.602549698 | -0.208 |
| cg08428292 | I  | 37 | 16 | 85981373                   | 0.71 | 4.57E-06 | 5.34042 | 0.43061782 | 0.222182557 | 0.208  |
| cg13221924 | II | 37 | 17 | 6495080 KIAA0753           | 0.54 | 0.0014   | 2.85345 | 0.64214975 | 0.850468781 | -0.208 |
| cg16030878 | II | 37 | 17 | 77914307 TBC1D16           | 0.62 | 0.0001   | 3.98291 | 0.55390097 | 0.761834344 | -0.208 |
| cg24259291 | II | 37 | 20 | 47874072 ZNFX1             | 0.62 | 0.0001   | 3.98291 | 0.52262036 | 0.730910036 | -0.208 |
| cg15125868 | II | 37 | 21 | 35746798 FAM165B           | 0.58 | 0.00041  | 3.39184 | 0.41333997 | 0.621009244 | -0.208 |
| cg14043316 | II | 37 | 22 | 50743420 PLXNB2            | 0.54 | 0.0014   | 2.85345 | 0.42184291 | 0.630068941 | -0.208 |

|            |    |    |    |                                 |      |          |         |            |             |        |
|------------|----|----|----|---------------------------------|------|----------|---------|------------|-------------|--------|
| cg16686279 | II | 37 | 1  | 4087226                         | 0.42 | 0.02991  | 1.52413 | 0.62924075 | 0.421787882 | 0.207  |
| cg09366519 | II | 37 | 1  | 209877970 HSD11B1;HSD11B1       | 0.62 | 0.0001   | 3.98291 | 0.65708282 | 0.864211868 | -0.207 |
| cg13359689 | II | 37 | 2  | 55636555 CCDC88A;CCDC88A        | 0.46 | 0.01197  | 1.92207 | 0.34417021 | 0.551392126 | -0.207 |
| cg11464160 | II | 37 | 2  | 131870398 PLEKHB2;PLEKHB2       | 0.58 | 0.00041  | 3.39184 | 0.50259514 | 0.709440488 | -0.207 |
| cg25138484 | I  | 37 | 2  | 233242758 ALPP                  | 0.5  | 0.00432  | 2.36443 | 0.54113561 | 0.334536858 | 0.207  |
| cg00812557 | II | 37 | 4  | 38073835 TBC1D1                 | 0.67 | 2.34E-05 | 4.63072 | 0.30087634 | 0.508374914 | -0.207 |
| cg05524458 | II | 37 | 5  | 10566782 ANKRD33B               | 0.42 | 0.02991  | 1.52413 | 0.57853941 | 0.371314178 | 0.207  |
| cg17781669 | II | 37 | 5  | 149868359                       | 0.67 | 2.34E-05 | 4.63072 | 0.36189237 | 0.569242835 | -0.207 |
| cg10578938 | II | 37 | 5  | 156695410 CYFIP2;CYFIP2;CYFI    | 0.58 | 0.00041  | 3.39184 | 0.40682428 | 0.199898645 | 0.207  |
| cg26683398 | II | 37 | 5  | 179220589 LTC4S                 | 0.62 | 0.0001   | 3.98291 | 0.43072054 | 0.638125303 | -0.207 |
| cg09698826 | II | 37 | 6  | 12114403 HIVEP1                 | 0.58 | 0.00041  | 3.39184 | 0.80931748 | 0.601893435 | 0.207  |
| cg20241876 | II | 37 | 6  | 32180045 NOTCH4                 | 0.5  | 0.00432  | 2.36443 | 0.60340382 | 0.81076118  | -0.207 |
| cg00904258 | II | 37 | 7  | 968194 ADAP1                    | 0.54 | 0.0014   | 2.85345 | 0.49373183 | 0.700298944 | -0.207 |
| cg16569650 | II | 37 | 7  | 2773072 GNA12                   | 0.62 | 0.0001   | 3.98291 | 0.46175188 | 0.668684333 | -0.207 |
| cg09060789 | II | 37 | 11 | 1884988 LSP1                    | 0.54 | 0.0014   | 2.85345 | 0.40557524 | 0.612106857 | -0.207 |
| cg11468085 | I  | 37 | 11 | 67435577 ALDH3B2;ALDH3B2        | 0.5  | 0.00432  | 2.36443 | 0.35749923 | 0.150412835 | 0.207  |
| cg10687644 | II | 37 | 11 | 72527565 ATG16L2                | 0.67 | 2.34E-05 | 4.63072 | 0.41972692 | 0.627128546 | -0.207 |
| cg04625873 | II | 37 | 11 | 118754530 CXCR5                 | 0.46 | 0.01197  | 1.92207 | 0.5640459  | 0.356782096 | 0.207  |
| cg25700432 | II | 37 | 13 | 20797446 GJB6;GJB6;GJB6;GJB6    | 0.67 | 2.34E-05 | 4.63072 | 0.57066507 | 0.777172542 | -0.207 |
| cg14184693 | II | 37 | 15 | 44085947 SERF2;MIR1282          | 0.54 | 0.0014   | 2.85345 | 0.40880886 | 0.615714466 | -0.207 |
| cg04962621 | II | 37 | 16 | 4714733 MGRN1;MGRN1;MGRN1       | 0.62 | 0.0001   | 3.98291 | 0.43329133 | 0.639870447 | -0.207 |
| cg12799029 | II | 37 | 17 | 984184 ABR;ABR;ABR              | 0.54 | 0.0014   | 2.85345 | 0.25995356 | 0.46718443  | -0.207 |
| cg25930786 | II | 37 | 19 | 54584636 TARM1                  | 0.58 | 0.00041  | 3.39184 | 0.57461366 | 0.781366213 | -0.207 |
| cg15091747 | II | 37 | 21 | 36262896 RUNX1                  | 0.58 | 0.00041  | 3.39184 | 0.45684259 | 0.663409298 | -0.207 |
| cg21935981 | I  | 37 | 22 | 45608465 C22orf9;C22orf9        | 0.62 | 0.0001   | 3.98291 | 0.73559053 | 0.942656715 | -0.207 |
| cg19595244 | II | 37 | 1  | 110526158 AHCYL1                | 0.54 | 0.0014   | 2.85345 | 0.60447509 | 0.810280899 | -0.206 |
| cg16139316 | II | 37 | 1  | 153330758 S100A9                | 0.58 | 0.00041  | 3.39184 | 0.36535657 | 0.57086729  | -0.206 |
| cg11827101 | II | 37 | 2  | 8468422                         | 0.62 | 0.0001   | 3.98291 | 0.49551002 | 0.701861601 | -0.206 |
| cg20730966 | II | 37 | 3  | 33095886 GLB1;GLB1;GLB1         | 0.46 | 0.01197  | 1.92207 | 0.31623366 | 0.5220998   | -0.206 |
| cg09693588 | II | 37 | 3  | 66633255                        | 0.71 | 4.57E-06 | 5.34042 | 0.56056491 | 0.354309857 | 0.206  |
| cg04855678 | I  | 37 | 3  | 195946921 OSTalpha              | 0.5  | 0.00432  | 2.36443 | 0.68016211 | 0.885984519 | -0.206 |
| cg04576021 | II | 37 | 6  | 32784255 HLA-DOB                | 0.46 | 0.01197  | 1.92207 | 0.63484044 | 0.429166881 | 0.206  |
| cg19263161 | I  | 37 | 7  | 1144982 C7orf50;C7orf50;C7orf50 | 0.62 | 0.0001   | 3.98291 | 0.68223134 | 0.47617244  | 0.206  |

|            |    |    |    |           |                   |      |          |         |            |             |        |
|------------|----|----|----|-----------|-------------------|------|----------|---------|------------|-------------|--------|
| cg26565544 | II | 37 | 7  | 101361527 |                   | 0.62 | 0.0001   | 3.98291 | 0.3699115  | 0.575466885 | -0.206 |
| cg13699650 | II | 37 | 9  | 126102244 |                   | 0.46 | 0.01197  | 1.92207 | 0.55200216 | 0.346054457 | 0.206  |
| cg09233392 | I  | 37 | 10 | 50887488  | C10orf53;C10orf53 | 0.62 | 0.0001   | 3.98291 | 0.21198077 | 0.4180469   | -0.206 |
| cg07652788 | II | 37 | 10 | 133598589 |                   | 0.5  | 0.00432  | 2.36443 | 0.75683018 | 0.551065582 | 0.206  |
| cg17635080 | II | 37 | 12 | 109030115 |                   | 0.5  | 0.00432  | 2.36443 | 0.3805498  | 0.174167894 | 0.206  |
| cg20043258 | I  | 37 | 14 | 103468582 | CDC42BPB          | 0.58 | 0.00041  | 3.39184 | 0.84507442 | 0.638897619 | 0.206  |
| cg09837656 | II | 37 | 15 | 65149245  | PLEKHO2           | 0.5  | 0.00432  | 2.36443 | 0.45629857 | 0.662033643 | -0.206 |
| cg04781080 | II | 37 | 15 | 68924114  | CORO2B            | 0.46 | 0.01197  | 1.92207 | 0.49968151 | 0.293405209 | 0.206  |
| cg05575505 | II | 37 | 15 | 101262162 |                   | 0.46 | 0.01197  | 1.92207 | 0.49300874 | 0.698758128 | -0.206 |
| cg04329347 | II | 37 | 16 | 30063148  | ALDOA             | 0.71 | 4.57E-06 | 5.34042 | 0.52432597 | 0.730629959 | -0.206 |
| cg26954174 | II | 37 | 16 | 50730813  | NOD2              | 0.46 | 0.01197  | 1.92207 | 0.3385226  | 0.544500752 | -0.206 |
| cg07127456 | II | 37 | 16 | 66583081  | TK2               | 0.54 | 0.0014   | 2.85345 | 0.52200804 | 0.315701783 | 0.206  |
| cg00582663 | II | 37 | 17 | 7815834   | CHD3;CHD3;CHD3    | 0.62 | 0.0001   | 3.98291 | 0.41461058 | 0.620562856 | -0.206 |
| cg04658021 | II | 37 | 17 | 8056967   | PER1              | 0.5  | 0.00432  | 2.36443 | 0.4196167  | 0.625168732 | -0.206 |
| cg21028142 | II | 37 | 17 | 79581711  | NPLOC4            | 0.54 | 0.0014   | 2.85345 | 0.66909909 | 0.462707461 | 0.206  |
| cg06705017 | II | 37 | 18 | 77552402  |                   | 0.5  | 0.00432  | 2.36443 | 0.55584431 | 0.761547521 | -0.206 |
| cg07073964 | II | 37 | 19 | 698371    |                   | 0.62 | 0.0001   | 3.98291 | 0.60217883 | 0.807909725 | -0.206 |
| cg23312431 | II | 37 | 21 | 45773997  | TRPM2             | 0.58 | 0.00041  | 3.39184 | 0.36985158 | 0.576288604 | -0.206 |
| cg03125765 | II | 37 | 22 | 30686808  | GATSL3            | 0.58 | 0.00041  | 3.39184 | 0.46656381 | 0.260813841 | 0.206  |
| cg05249836 | II | 37 | 22 | 45609402  | C22orf9;C22orf9   | 0.67 | 2.34E-05 | 4.63072 | 0.49908911 | 0.705197263 | -0.206 |
| cg26256901 | II | 37 | 1  | 23918838  |                   | 0.54 | 0.0014   | 2.85345 | 0.62528883 | 0.420074415 | 0.205  |
| cg14708360 | II | 37 | 2  | 129396420 |                   | 0.5  | 0.00432  | 2.36443 | 0.58686367 | 0.791536155 | -0.205 |
| cg18452449 | II | 37 | 3  | 52260671  | TLR9              | 0.42 | 0.02991  | 1.52413 | 0.51927054 | 0.314256436 | 0.205  |
| cg07341007 | I  | 37 | 3  | 195489909 | MUC4;MUC4;MUC4    | 0.67 | 2.34E-05 | 4.63072 | 0.55331952 | 0.75813441  | -0.205 |
| cg14647287 | II | 37 | 4  | 6927183   | TBC1D14;TBC1D14   | 0.58 | 0.00041  | 3.39184 | 0.43057519 | 0.635665788 | -0.205 |
| cg26689780 | II | 37 | 4  | 10079554  | WDR1;WDR1         | 0.5  | 0.00432  | 2.36443 | 0.38665804 | 0.591595851 | -0.205 |
| cg25015371 | II | 37 | 6  | 108874950 |                   | 0.62 | 0.0001   | 3.98291 | 0.5494644  | 0.754778863 | -0.205 |
| cg13821176 | II | 37 | 8  | 126448338 | TRIB1             | 0.62 | 0.0001   | 3.98291 | 0.66455978 | 0.869401897 | -0.205 |
| cg14565465 | II | 37 | 9  | 74298933  | TMEM2;TMEM2       | 0.54 | 0.0014   | 2.85345 | 0.40818136 | 0.613374219 | -0.205 |
| cg07608867 | II | 37 | 10 | 49879854  |                   | 0.42 | 0.02991  | 1.52413 | 0.52757608 | 0.32255966  | 0.205  |
| cg03141090 | II | 37 | 10 | 127262277 | LOC100169752      | 0.5  | 0.00432  | 2.36443 | 0.76511872 | 0.560310093 | 0.205  |
| cg16698623 | II | 37 | 10 | 131412968 | MGMT              | 0.42 | 0.02991  | 1.52413 | 0.57515929 | 0.370177979 | 0.205  |
| cg07080244 | I  | 37 | 11 | 120051676 |                   | 0.46 | 0.01197  | 1.92207 | 0.34040839 | 0.545462828 | -0.205 |

|            |    |    |    |           |                   |      |          |         |            |             |        |
|------------|----|----|----|-----------|-------------------|------|----------|---------|------------|-------------|--------|
| cg17281677 | II | 37 | 12 | 6658557   | IFFO1;IFFO1;IFFO1 | 0.58 | 0.00041  | 3.39184 | 0.63118722 | 0.83609832  | -0.205 |
| cg02416333 | II | 37 | 13 | 22523390  |                   | 0.46 | 0.01197  | 1.92207 | 0.4498113  | 0.245147936 | 0.205  |
| cg10877241 | II | 37 | 13 | 52131904  |                   | 0.58 | 0.00041  | 3.39184 | 0.67307269 | 0.878155355 | -0.205 |
| cg27627493 | II | 37 | 15 | 63767360  |                   | 0.54 | 0.0014   | 2.85345 | 0.51638345 | 0.311202619 | 0.205  |
| cg23035449 | II | 37 | 15 | 90578555  | ZNF710            | 0.58 | 0.00041  | 3.39184 | 0.37401495 | 0.579103818 | -0.205 |
| cg00528616 | II | 37 | 16 | 75036318  | ZNRF1             | 0.62 | 0.0001   | 3.98291 | 0.18780041 | 0.392759066 | -0.205 |
| cg01530032 | II | 37 | 17 | 19435805  | SLC47A1           | 0.54 | 0.0014   | 2.85345 | 0.37859345 | 0.583097299 | -0.205 |
| cg15610437 | II | 37 | 19 | 827821    | AZU1              | 0.5  | 0.00432  | 2.36443 | 0.45945423 | 0.664782418 | -0.205 |
| cg19821297 | II | 37 | 19 | 12890029  |                   | 0.58 | 0.00041  | 3.39184 | 0.44155778 | 0.64665747  | -0.205 |
| cg15224348 | I  | 37 | 19 | 45543538  | SFRS16            | 0.67 | 2.34E-05 | 4.63072 | 0.63537541 | 0.840481585 | -0.205 |
| cg23511285 | II | 37 | 19 | 48205761  | GLTSCR1           | 0.62 | 0.0001   | 3.98291 | 0.54505591 | 0.750418549 | -0.205 |
| cg10416593 | II | 37 | 22 | 50966123  | TYMP;SCO2;TYMP;   | 0.58 | 0.00041  | 3.39184 | 0.52033643 | 0.725364584 | -0.205 |
| cg26933869 | II | 37 | 1  | 19218007  | ALDH4A1;ALDH4A1   | 0.58 | 0.00041  | 3.39184 | 0.43081289 | 0.63522091  | -0.204 |
| cg04087271 | II | 37 | 1  | 20915334  | CDA               | 0.42 | 0.02991  | 1.52413 | 0.21538691 | 0.41929694  | -0.204 |
| cg27217350 | II | 37 | 2  | 242813634 | C2orf85           | 0.5  | 0.00432  | 2.36443 | 0.5050217  | 0.301266166 | 0.204  |
| cg18731398 | I  | 37 | 3  | 123414733 | MYLK;MYLK;MYLK;I  | 0.62 | 0.0001   | 3.98291 | 0.52975841 | 0.73359725  | -0.204 |
| cg16571794 | II | 37 | 4  | 7648627   | SORCS2            | 0.54 | 0.0014   | 2.85345 | 0.39576219 | 0.599336901 | -0.204 |
| cg17590710 | II | 37 | 5  | 177740069 | COL23A1           | 0.54 | 0.0014   | 2.85345 | 0.4561482  | 0.659835678 | -0.204 |
| cg03116466 | II | 37 | 7  | 2116512   | MAD1L1;MAD1L1;M   | 0.62 | 0.0001   | 3.98291 | 0.41887045 | 0.622849206 | -0.204 |
| cg19014792 | II | 37 | 7  | 3019159   | CARD11            | 0.5  | 0.00432  | 2.36443 | 0.51964146 | 0.316056907 | 0.204  |
| cg03190219 | I  | 37 | 7  | 25898688  |                   | 0.62 | 0.0001   | 3.98291 | 0.24182914 | 0.445494375 | -0.204 |
| cg14722693 | II | 37 | 8  | 19436451  | CSGALNACT1;CSGA   | 0.5  | 0.00432  | 2.36443 | 0.38108537 | 0.584989761 | -0.204 |
| cg11893955 | I  | 37 | 8  | 28918821  |                   | 0.54 | 0.0014   | 2.85345 | 0.7419078  | 0.537570216 | 0.204  |
| cg04653308 | II | 37 | 9  | 131872018 | CRAT;CRAT;PPP2R4  | 0.58 | 0.00041  | 3.39184 | 0.29941287 | 0.503891043 | -0.204 |
| cg09455513 | II | 37 | 10 | 3792283   |                   | 0.67 | 2.34E-05 | 4.63072 | 0.1748934  | 0.379042149 | -0.204 |
| cg08863777 | I  | 37 | 11 | 94278457  | FUT4              | 0.58 | 0.00041  | 3.39184 | 0.52201074 | 0.726121452 | -0.204 |
| cg20856545 | II | 37 | 13 | 114917297 |                   | 0.67 | 2.34E-05 | 4.63072 | 0.59977047 | 0.803908571 | -0.204 |
| cg26118358 | II | 37 | 14 | 23321005  |                   | 0.5  | 0.00432  | 2.36443 | 0.55566456 | 0.759903053 | -0.204 |
| cg02042712 | II | 37 | 16 | 57702239  | GPR97;GPR97       | 0.58 | 0.00041  | 3.39184 | 0.34536602 | 0.548904189 | -0.204 |
| cg27326306 | II | 37 | 16 | 66442374  |                   | 0.54 | 0.0014   | 2.85345 | 0.44255789 | 0.646886601 | -0.204 |
| cg04819180 | II | 37 | 17 | 80829157  | TBCD              | 0.46 | 0.01197  | 1.92207 | 0.46545792 | 0.261408203 | 0.204  |
| cg19649900 | I  | 37 | 19 | 1155030   | SBNO2             | 0.54 | 0.0014   | 2.85345 | 0.51560377 | 0.719751147 | -0.204 |
| cg10357682 | II | 37 | 20 | 3745817   | C20orf27          | 0.62 | 0.0001   | 3.98291 | 0.60971632 | 0.813957059 | -0.204 |

|            |    |    |    |           |                     |      |          |         |            |             |        |
|------------|----|----|----|-----------|---------------------|------|----------|---------|------------|-------------|--------|
| cg11525020 | II | 37 | 20 | 17674233  | BANF2               | 0.62 | 0.0001   | 3.98291 | 0.80202405 | 0.598184563 | 0.204  |
| cg12504284 | II | 37 | 22 | 31601057  | RNF185;RNF185;RN    | 0.71 | 4.57E-06 | 5.34042 | 0.49783125 | 0.702222846 | -0.204 |
| cg07233343 | II | 37 | 1  | 17944660  | ARHGEF10L;ARHGE     | 0.62 | 0.0001   | 3.98291 | 0.60736671 | 0.810226061 | -0.203 |
| cg06958535 | II | 37 | 1  | 203734478 | LAX1;LAX1;LAX1      | 0.62 | 0.0001   | 3.98291 | 0.72742787 | 0.52402081  | 0.203  |
| cg07091529 | II | 37 | 2  | 16804409  | FAM49A              | 0.58 | 0.00041  | 3.39184 | 0.52142969 | 0.724155991 | -0.203 |
| cg23924526 | II | 37 | 2  | 45998548  | PRKCE               | 0.5  | 0.00432  | 2.36443 | 0.30562183 | 0.508744124 | -0.203 |
| cg07262620 | II | 37 | 2  | 47982632  |                     | 0.5  | 0.00432  | 2.36443 | 0.57919539 | 0.375784404 | 0.203  |
| cg00810971 | II | 37 | 2  | 65085764  |                     | 0.58 | 0.00041  | 3.39184 | 0.50126272 | 0.704473172 | -0.203 |
| cg12571570 | II | 37 | 2  | 145267984 | ZEB2;ZEB2           | 0.54 | 0.0014   | 2.85345 | 0.3472886  | 0.550725675 | -0.203 |
| cg14012546 | II | 37 | 2  | 233981788 | INPP5D;INPP5D       | 0.58 | 0.00041  | 3.39184 | 0.52725837 | 0.730291922 | -0.203 |
| cg06360820 | II | 37 | 2  | 242988706 |                     | 0.5  | 0.00432  | 2.36443 | 0.71137268 | 0.914207155 | -0.203 |
| cg20438472 | II | 37 | 3  | 184293365 | EPHB3               | 0.62 | 0.0001   | 3.98291 | 0.56007232 | 0.762627904 | -0.203 |
| cg24748631 | II | 37 | 5  | 598724    |                     | 0.67 | 2.34E-05 | 4.63072 | 0.45689351 | 0.25426599  | 0.203  |
| cg15253304 | I  | 37 | 6  | 209809    |                     | 0.58 | 0.00041  | 3.39184 | 0.71246884 | 0.509828385 | 0.203  |
| cg12629909 | II | 37 | 6  | 32126616  | PPT2;PPT2           | 0.46 | 0.01197  | 1.92207 | 0.67676157 | 0.474078458 | 0.203  |
| cg18542546 | II | 37 | 7  | 1982333   | MAD1L1;MAD1L1;M     | 0.5  | 0.00432  | 2.36443 | 0.6641969  | 0.866841727 | -0.203 |
| cg13008174 | II | 37 | 8  | 11640960  | NEIL2;NEIL2;NEIL2;I | 0.58 | 0.00041  | 3.39184 | 0.38507853 | 0.588167032 | -0.203 |
| cg06043201 | II | 37 | 8  | 28974428  | KIF13B              | 0.62 | 0.0001   | 3.98291 | 0.46072088 | 0.663760222 | -0.203 |
| cg00219816 | I  | 37 | 8  | 96280555  | C8orf37             | 0.54 | 0.0014   | 2.85345 | 0.65364051 | 0.856264919 | -0.203 |
| cg10533990 | II | 37 | 11 | 71846733  | FOLR3               | 0.54 | 0.0014   | 2.85345 | 0.4449892  | 0.647865872 | -0.203 |
| cg18589858 | II | 37 | 11 | 74860985  | SLCO2B1;SLCO2B1     | 0.62 | 0.0001   | 3.98291 | 0.52473483 | 0.72772783  | -0.203 |
| cg06495803 | II | 37 | 12 | 6553489   | CD27;LOC678655      | 0.58 | 0.00041  | 3.39184 | 0.69624574 | 0.493363385 | 0.203  |
| cg11848173 | II | 37 | 12 | 56121015  | CD63;CD63           | 0.54 | 0.0014   | 2.85345 | 0.38697494 | 0.590428397 | -0.203 |
| cg07051833 | II | 37 | 12 | 93808395  | UBE2N               | 0.58 | 0.00041  | 3.39184 | 0.45474167 | 0.658184419 | -0.203 |
| cg16422365 | I  | 37 | 14 | 106041833 |                     | 0.62 | 0.0001   | 3.98291 | 0.53867941 | 0.335988079 | 0.203  |
| cg17827208 | II | 37 | 15 | 99470414  | IGF1R               | 0.58 | 0.00041  | 3.39184 | 0.61845686 | 0.821856975 | -0.203 |
| cg27090678 | II | 37 | 16 | 85514649  |                     | 0.5  | 0.00432  | 2.36443 | 0.53886329 | 0.335958396 | 0.203  |
| cg02371935 | II | 37 | 16 | 87521363  | ZCCHC14             | 0.54 | 0.0014   | 2.85345 | 0.51304332 | 0.715634516 | -0.203 |
| cg11972721 | II | 37 | 17 | 17394732  | MED9                | 0.46 | 0.01197  | 1.92207 | 0.65948327 | 0.456782184 | 0.203  |
| cg22961402 | II | 37 | 17 | 27913793  | GIT1;GIT1           | 0.58 | 0.00041  | 3.39184 | 0.62398944 | 0.826557277 | -0.203 |
| cg19389293 | II | 37 | 18 | 13641872  | C18orf1;C18orf1;C1  | 0.46 | 0.01197  | 1.92207 | 0.2897263  | 0.492845726 | -0.203 |
| cg10819238 | I  | 37 | 19 | 1155184   | SBNO2               | 0.54 | 0.0014   | 2.85345 | 0.35384947 | 0.557300524 | -0.203 |
| cg23001905 | II | 37 | 19 | 1265302   |                     | 0.58 | 0.00041  | 3.39184 | 0.6568298  | 0.453843437 | 0.203  |

|            |    |    |    |           |                   |      |          |         |            |             |        |
|------------|----|----|----|-----------|-------------------|------|----------|---------|------------|-------------|--------|
| cg07841371 | I  | 37 | 1  | 1114912   | TLL10;TLL10       | 0.58 | 0.00041  | 3.39184 | 0.60498701 | 0.403291728 | 0.202  |
| cg10818566 | II | 37 | 2  | 47197798  | TTC7A             | 0.46 | 0.01197  | 1.92207 | 0.33067257 | 0.532759587 | -0.202 |
| cg20738719 | II | 37 | 3  | 122728088 | SEMA5B            | 0.54 | 0.0014   | 2.85345 | 0.37413191 | 0.576219239 | -0.202 |
| cg10880973 | II | 37 | 6  | 157982213 | ZDHHC14;ZDHHC14   | 0.5  | 0.00432  | 2.36443 | 0.74970704 | 0.547586641 | 0.202  |
| cg07180197 | II | 37 | 8  | 67039155  | TRIM55;TRIM55;TR  | 0.54 | 0.0014   | 2.85345 | 0.64748009 | 0.445668594 | 0.202  |
| cg10639435 | II | 37 | 8  | 146104221 | ZNF250;ZNF250     | 0.67 | 2.34E-05 | 4.63072 | 0.67369931 | 0.472087972 | 0.202  |
| cg13681496 | II | 37 | 9  | 95817516  |                   | 0.58 | 0.00041  | 3.39184 | 0.27446529 | 0.476283527 | -0.202 |
| cg04236137 | II | 37 | 9  | 123655887 |                   | 0.5  | 0.00432  | 2.36443 | 0.56377448 | 0.361832997 | 0.202  |
| cg14611767 | II | 37 | 9  | 134127575 |                   | 0.54 | 0.0014   | 2.85345 | 0.58248344 | 0.784786414 | -0.202 |
| cg04369957 | II | 37 | 11 | 8754756   | ST5;ST5;ST5       | 0.46 | 0.01197  | 1.92207 | 0.69417617 | 0.491837634 | 0.202  |
| cg01110839 | II | 37 | 11 | 47437783  | SLC39A13;SLC39A1  | 0.62 | 0.0001   | 3.98291 | 0.60876164 | 0.810281239 | -0.202 |
| cg24422316 | II | 37 | 11 | 60930346  | VPS37C            | 0.54 | 0.0014   | 2.85345 | 0.53269875 | 0.735031128 | -0.202 |
| cg01183510 | II | 37 | 12 | 66582582  | IRAK3;IRAK3       | 0.46 | 0.01197  | 1.92207 | 0.38292257 | 0.585340604 | -0.202 |
| cg09075968 | II | 37 | 13 | 113841799 | PCID2;PCID2;PCID2 | 0.54 | 0.0014   | 2.85345 | 0.54145535 | 0.743205404 | -0.202 |
| cg12437013 | II | 37 | 13 | 114161939 | TMCO3             | 0.46 | 0.01197  | 1.92207 | 0.65740163 | 0.858917081 | -0.202 |
| cg01815801 | II | 37 | 13 | 114270609 | TFDP1;TFDP1       | 0.58 | 0.00041  | 3.39184 | 0.54907939 | 0.750910666 | -0.202 |
| cg23013137 | II | 37 | 14 | 24676542  | TSSK4             | 0.5  | 0.00432  | 2.36443 | 0.50159034 | 0.299108342 | 0.202  |
| cg27518631 | II | 37 | 16 | 2846005   |                   | 0.62 | 0.0001   | 3.98291 | 0.61224305 | 0.814295242 | -0.202 |
| cg10472651 | II | 37 | 16 | 66555859  | TK2               | 0.54 | 0.0014   | 2.85345 | 0.35752168 | 0.559374835 | -0.202 |
| cg16768966 | II | 37 | 17 | 9940227   | GAS7;GAS7         | 0.5  | 0.00432  | 2.36443 | 0.58961784 | 0.791419683 | -0.202 |
| cg05526498 | II | 37 | 17 | 49012893  |                   | 0.54 | 0.0014   | 2.85345 | 0.55787379 | 0.759798193 | -0.202 |
| cg14885762 | II | 37 | 17 | 75446450  | SEPT9;SEPT9;SEPT9 | 0.46 | 0.01197  | 1.92207 | 0.47148934 | 0.269706898 | 0.202  |
| cg04425701 | II | 37 | 19 | 35630474  | FXD1;FXD1;FXD1    | 0.58 | 0.00041  | 3.39184 | 0.48362164 | 0.685693896 | -0.202 |
| cg02524754 | II | 37 | 21 | 44985005  | HSF2BP            | 0.58 | 0.00041  | 3.39184 | 0.41441157 | 0.616872461 | -0.202 |
| cg10511985 | II | 37 | 1  | 24053853  |                   | 0.54 | 0.0014   | 2.85345 | 0.36190432 | 0.562561509 | -0.201 |
| cg10104487 | II | 37 | 1  | 27329335  |                   | 0.62 | 0.0001   | 3.98291 | 0.4732879  | 0.674525539 | -0.201 |
| cg15518113 | II | 37 | 1  | 167400121 | CD247;CD247       | 0.54 | 0.0014   | 2.85345 | 0.73633447 | 0.535089402 | 0.201  |
| cg24537993 | II | 37 | 1  | 204275926 | PLEKHA6           | 0.58 | 0.00041  | 3.39184 | 0.33807731 | 0.539116603 | -0.201 |
| cg09161446 | I  | 37 | 2  | 240697468 |                   | 0.58 | 0.00041  | 3.39184 | 0.61998992 | 0.419338495 | 0.201  |
| cg23002590 | II | 37 | 6  | 167012092 | RPS6KA2;RPS6KA2   | 0.5  | 0.00432  | 2.36443 | 0.55192745 | 0.75283063  | -0.201 |
| cg07212384 | II | 37 | 7  | 99761053  | GAL3ST4           | 0.71 | 4.57E-06 | 5.34042 | 0.64221153 | 0.44147482  | 0.201  |
| cg05992079 | II | 37 | 9  | 35650999  | SIT1              | 0.58 | 0.00041  | 3.39184 | 0.44796179 | 0.24741612  | 0.201  |
| cg24757160 | I  | 37 | 11 | 67804112  | NDUFS8            | 0.58 | 0.00041  | 3.39184 | 0.51984116 | 0.720619854 | -0.201 |

|            |    |    |    |                          |      |          |         |            |             |        |
|------------|----|----|----|--------------------------|------|----------|---------|------------|-------------|--------|
| cg07235053 | II | 37 | 11 | 94278581 FUT4            | 0.71 | 4.57E-06 | 5.34042 | 0.54737425 | 0.748596984 | -0.201 |
| cg12371569 | II | 37 | 12 | 13278271                 | 0.5  | 0.00432  | 2.36443 | 0.24727344 | 0.448317846 | -0.201 |
| cg06611426 | I  | 37 | 12 | 52404161 GRASP           | 0.62 | 0.0001   | 3.98291 | 0.46267604 | 0.663683543 | -0.201 |
| cg17707487 | II | 37 | 13 | 114261869 TFDP1;TFDP1    | 0.5  | 0.00432  | 2.36443 | 0.4427233  | 0.643323501 | -0.201 |
| cg09756109 | I  | 37 | 16 | 1593178 IFT140;TMEM204   | 0.75 | 7.61E-07 | 6.11857 | 0.66474197 | 0.865663258 | -0.201 |
| cg08276042 | I  | 37 | 16 | 2740348 KCTD5            | 0.54 | 0.0014   | 2.85345 | 0.47874466 | 0.680025097 | -0.201 |
| cg07089942 | II | 37 | 16 | 49666504 ZNF423          | 0.5  | 0.00432  | 2.36443 | 0.44868432 | 0.247863818 | 0.201  |
| cg04466886 | II | 37 | 16 | 66521191                 | 0.62 | 0.0001   | 3.98291 | 0.37250875 | 0.573796788 | -0.201 |
| cg04561791 | II | 37 | 16 | 85478769                 | 0.54 | 0.0014   | 2.85345 | 0.45144581 | 0.25026956  | 0.201  |
| cg16484912 | II | 37 | 17 | 74464334 AANAT;AANAT     | 0.46 | 0.01197  | 1.92207 | 0.54015928 | 0.339536216 | 0.201  |
| cg04157865 | II | 37 | 17 | 77914162 TBC1D16         | 0.58 | 0.00041  | 3.39184 | 0.55403848 | 0.755279242 | -0.201 |
| cg12119693 | II | 37 | 17 | 80581925 WDR45L          | 0.58 | 0.00041  | 3.39184 | 0.48620481 | 0.687566132 | -0.201 |
| cg05641903 | II | 37 | 19 | 7767584 FCER2            | 0.58 | 0.00041  | 3.39184 | 0.4387228  | 0.639604759 | -0.201 |
| cg01772743 | II | 37 | 21 | 45576085                 | 0.62 | 0.0001   | 3.98291 | 0.66317161 | 0.462596158 | 0.201  |
| cg20686403 | II | 37 | 22 | 38438206                 | 0.5  | 0.00432  | 2.36443 | 0.51492964 | 0.715927876 | -0.201 |
| cg05933510 | II | 37 | 1  | 9257092                  | 0.67 | 2.34E-05 | 4.63072 | 0.60506286 | 0.804838616 | -0.2   |
| cg07571745 | II | 37 | 1  | 32715428 LCK             | 0.54 | 0.0014   | 2.85345 | 0.40156292 | 0.201726161 | 0.2    |
| cg13804478 | II | 37 | 1  | 155158319 MUC1;MUC1;MUC1 | 0.46 | 0.01197  | 1.92207 | 0.49315355 | 0.292904286 | 0.2    |
| cg15288326 | II | 37 | 1  | 200994098 KIF21B         | 0.62 | 0.0001   | 3.98291 | 0.63636098 | 0.836241091 | -0.2   |
| cg22489510 | II | 37 | 2  | 8675599                  | 0.58 | 0.00041  | 3.39184 | 0.42962685 | 0.629325338 | -0.2   |
| cg10991454 | II | 37 | 2  | 30834674 LCLAT1;LCLAT1   | 0.62 | 0.0001   | 3.98291 | 0.5900597  | 0.790463347 | -0.2   |
| cg23410501 | II | 37 | 3  | 12937954                 | 0.58 | 0.00041  | 3.39184 | 0.34246686 | 0.542866409 | -0.2   |
| cg01870865 | II | 37 | 3  | 48507087 TREX1;TREX1     | 0.5  | 0.00432  | 2.36443 | 0.25065142 | 0.45060919  | -0.2   |
| cg27022853 | II | 37 | 3  | 196377815 LRRC33         | 0.71 | 4.57E-06 | 5.34042 | 0.61237465 | 0.812011151 | -0.2   |
| cg15686615 | II | 37 | 4  | 6781565                  | 0.58 | 0.00041  | 3.39184 | 0.46943152 | 0.669783775 | -0.2   |
| cg19268453 | II | 37 | 6  | 32905114 HLA-DMB         | 0.5  | 0.00432  | 2.36443 | 0.54561597 | 0.74552121  | -0.2   |
| cg11854981 | II | 37 | 6  | 42219847 TRERF1          | 0.54 | 0.0014   | 2.85345 | 0.48923595 | 0.689261224 | -0.2   |
| cg20332503 | II | 37 | 7  | 143081287 ZYX;ZYX        | 0.62 | 0.0001   | 3.98291 | 0.62035741 | 0.820655324 | -0.2   |
| cg00042325 | II | 37 | 7  | 150104655 LOC728743      | 0.5  | 0.00432  | 2.36443 | 0.51080581 | 0.310729834 | 0.2    |
| cg16396223 | II | 37 | 7  | 151422150 PRKAG2;PRKAG2  | 0.42 | 0.02991  | 1.52413 | 0.52310653 | 0.323358848 | 0.2    |
| cg24998197 | II | 37 | 8  | 60197574                 | 0.5  | 0.00432  | 2.36443 | 0.52988145 | 0.329938154 | 0.2    |
| cg07466463 | I  | 37 | 8  | 141574207 EIF2C2;EIF2C2  | 0.5  | 0.00432  | 2.36443 | 0.60887476 | 0.808387686 | -0.2   |
| cg14120703 | II | 37 | 9  | 139416102 NOTCH1         | 0.54 | 0.0014   | 2.85345 | 0.52236492 | 0.7227816   | -0.2   |

|            |    |    |    |           |                   |      |          |         |            |             |        |
|------------|----|----|----|-----------|-------------------|------|----------|---------|------------|-------------|--------|
| cg04930661 | II | 37 | 10 | 1531405   | ADARB2            | 0.5  | 0.00432  | 2.36443 | 0.63041387 | 0.430867854 | 0.2    |
| cg26169081 | I  | 37 | 10 | 12648338  | CAMK1D;CAMK1D     | 0.67 | 2.34E-05 | 4.63072 | 0.38752793 | 0.187511952 | 0.2    |
| cg08560387 | II | 37 | 10 | 82247853  | TSPAN14;TSPAN14   | 0.42 | 0.02991  | 1.52413 | 0.27149706 | 0.471694228 | -0.2   |
| cg17841267 | I  | 37 | 10 | 112117449 |                   | 0.54 | 0.0014   | 2.85345 | 0.77325357 | 0.573056669 | 0.2    |
| cg03324175 | II | 37 | 11 | 61124464  | CYBASC3;CYBASC3;  | 0.5  | 0.00432  | 2.36443 | 0.5037346  | 0.304229122 | 0.2    |
| cg27317813 | I  | 37 | 12 | 4398508   | CCND2             | 0.58 | 0.00041  | 3.39184 | 0.27131068 | 0.470997564 | -0.2   |
| cg09842118 | II | 37 | 14 | 21359737  | RNASE3            | 0.54 | 0.0014   | 2.85345 | 0.3463939  | 0.546558786 | -0.2   |
| cg23288563 | II | 37 | 14 | 21491469  | NDRG2;NDRG2;NDI   | 0.5  | 0.00432  | 2.36443 | 0.36078594 | 0.560932368 | -0.2   |
| cg21141089 | II | 37 | 17 | 46949704  |                   | 0.42 | 0.02991  | 1.52413 | 0.56472213 | 0.365134618 | 0.2    |
| cg22992772 | I  | 37 | 17 | 79030294  | BAIAP2;BAIAP2;BAI | 0.46 | 0.01197  | 1.92207 | 0.6972911  | 0.897199682 | -0.2   |
| cg04250920 | II | 37 | 17 | 79798629  |                   | 0.62 | 0.0001   | 3.98291 | 0.40464557 | 0.604657792 | -0.2   |
| cg01627405 | II | 37 | 19 | 2235127   | MIR1227;PLEKHJ1   | 0.5  | 0.00432  | 2.36443 | 0.50098582 | 0.700788608 | -0.2   |
| cg08418670 | I  | 37 | 19 | 4374567   | SH3GL1            | 0.58 | 0.00041  | 3.39184 | 0.71418654 | 0.914585687 | -0.2   |
| cg25734726 | II | 37 | 19 | 40948296  | SERTAD3;SERTAD3;  | 0.62 | 0.0001   | 3.98291 | 0.59397747 | 0.794359737 | -0.2   |
| cg15089806 | II | 37 | 1  | 43418199  | SLC2A1            | 0.58 | 0.00041  | 3.39184 | 0.44313103 | 0.243901167 | 0.199  |
| cg23647554 | I  | 37 | 3  | 42700674  | ZBTB47            | 0.58 | 0.00041  | 3.39184 | 0.69233146 | 0.890993895 | -0.199 |
| cg18566313 | II | 37 | 4  | 186733428 | SORBS2;SORBS2;SC  | 0.46 | 0.01197  | 1.92207 | 0.67774046 | 0.478503643 | 0.199  |
| cg25578949 | II | 37 | 5  | 964230    |                   | 0.46 | 0.01197  | 1.92207 | 0.66575297 | 0.466843616 | 0.199  |
| cg04586126 | I  | 37 | 5  | 176734633 | MXD3;MXD3         | 0.58 | 0.00041  | 3.39184 | 0.52955163 | 0.72900648  | -0.199 |
| cg05352838 | II | 37 | 6  | 33384391  | CUTA;CUTA;CUTA;C  | 0.54 | 0.0014   | 2.85345 | 0.7971694  | 0.597865005 | 0.199  |
| cg01003666 | II | 37 | 7  | 139929429 |                   | 0.67 | 2.34E-05 | 4.63072 | 0.6045706  | 0.405597543 | 0.199  |
| cg26651303 | I  | 37 | 7  | 158533204 | ESYT2             | 0.5  | 0.00432  | 2.36443 | 0.26413678 | 0.46285265  | -0.199 |
| cg07160014 | II | 37 | 11 | 47959926  |                   | 0.54 | 0.0014   | 2.85345 | 0.44037327 | 0.639667009 | -0.199 |
| cg15436385 | II | 37 | 11 | 72858122  |                   | 0.5  | 0.00432  | 2.36443 | 0.52931144 | 0.330666845 | 0.199  |
| cg15921911 | II | 37 | 14 | 69156160  |                   | 0.54 | 0.0014   | 2.85345 | 0.57333581 | 0.772541644 | -0.199 |
| cg09873524 | II | 37 | 15 | 23062853  | NIPA1;NIPA1       | 0.54 | 0.0014   | 2.85345 | 0.6814399  | 0.482058702 | 0.199  |
| cg02849507 | II | 37 | 16 | 14051717  |                   | 0.62 | 0.0001   | 3.98291 | 0.31703845 | 0.515565978 | -0.199 |
| cg10962223 | II | 37 | 17 | 16931836  |                   | 0.5  | 0.00432  | 2.36443 | 0.57639451 | 0.376987782 | 0.199  |
| cg06091647 | II | 37 | 17 | 78899392  | RPTOR;RPTOR       | 0.46 | 0.01197  | 1.92207 | 0.80085909 | 0.601545099 | 0.199  |
| cg16755833 | I  | 37 | 17 | 80866063  | TBCD              | 0.58 | 0.00041  | 3.39184 | 0.78448559 | 0.58536883  | 0.199  |
| cg25103337 | II | 37 | 1  | 9293583   | H6PD              | 0.54 | 0.0014   | 2.85345 | 0.46157921 | 0.659662355 | -0.198 |
| cg24375627 | II | 37 | 1  | 153509284 | S100A6            | 0.67 | 2.34E-05 | 4.63072 | 0.38169165 | 0.579417282 | -0.198 |
| cg12449916 | II | 37 | 2  | 207847811 |                   | 0.5  | 0.00432  | 2.36443 | 0.65421407 | 0.852408281 | -0.198 |

|            |    |    |    |                           |      |          |         |            |             |        |
|------------|----|----|----|---------------------------|------|----------|---------|------------|-------------|--------|
| cg00816240 | II | 37 | 2  | 232477075                 | 0.54 | 0.0014   | 2.85345 | 0.50413584 | 0.702593902 | -0.198 |
| cg03169059 | II | 37 | 2  | 240145022 HDAC4           | 0.5  | 0.00432  | 2.36443 | 0.33511424 | 0.532991428 | -0.198 |
| cg01669161 | II | 37 | 7  | 1632265                   | 0.46 | 0.01197  | 1.92207 | 0.38787128 | 0.190260487 | 0.198  |
| cg21161403 | I  | 37 | 8  | 1894604 ARHGEF10          | 0.58 | 0.00041  | 3.39184 | 0.57938314 | 0.77696844  | -0.198 |
| cg25642069 | II | 37 | 8  | 144408230 TOP1MT          | 0.54 | 0.0014   | 2.85345 | 0.53247371 | 0.730695444 | -0.198 |
| cg02304370 | II | 37 | 11 | 587926 PHRF1              | 0.46 | 0.01197  | 1.92207 | 0.5812427  | 0.779721034 | -0.198 |
| cg23478547 | I  | 37 | 11 | 69259265                  | 0.54 | 0.0014   | 2.85345 | 0.71862176 | 0.916147497 | -0.198 |
| cg11412713 | II | 37 | 11 | 94278413 FUT4             | 0.67 | 2.34E-05 | 4.63072 | 0.51836619 | 0.716080179 | -0.198 |
| cg03363565 | II | 37 | 16 | 474528 RAB11FIP3          | 0.58 | 0.00041  | 3.39184 | 0.46582334 | 0.664142745 | -0.198 |
| cg23599820 | II | 37 | 17 | 73456199 KIAA0195         | 0.46 | 0.01197  | 1.92207 | 0.35931811 | 0.556875894 | -0.198 |
| cg02807192 | II | 37 | 17 | 75524111                  | 0.58 | 0.00041  | 3.39184 | 0.41083575 | 0.212541034 | 0.198  |
| cg13103051 | II | 37 | 18 | 44260790 ST8SIA5          | 0.5  | 0.00432  | 2.36443 | 0.58036941 | 0.382192378 | 0.198  |
| cg27585074 | II | 37 | 19 | 1947960 CSNK1G2           | 0.46 | 0.01197  | 1.92207 | 0.48681118 | 0.685051258 | -0.198 |
| cg05955436 | II | 37 | 20 | 17660838 RRBP1;RRBP1      | 0.46 | 0.01197  | 1.92207 | 0.3191582  | 0.51765472  | -0.198 |
| cg08721026 | II | 37 | 1  | 31575349                  | 0.62 | 0.0001   | 3.98291 | 0.34885579 | 0.545572683 | -0.197 |
| cg17411016 | II | 37 | 2  | 47100912                  | 0.54 | 0.0014   | 2.85345 | 0.35230822 | 0.549406957 | -0.197 |
| cg26394380 | II | 37 | 2  | 85896001 SFTPB;SFTPB      | 0.46 | 0.01197  | 1.92207 | 0.50326771 | 0.306399957 | 0.197  |
| cg14813485 | II | 37 | 2  | 196460621                 | 0.5  | 0.00432  | 2.36443 | 0.66095536 | 0.463525547 | 0.197  |
| cg08180187 | II | 37 | 4  | 24796689 SOD3             | 0.62 | 0.0001   | 3.98291 | 0.58140882 | 0.778603461 | -0.197 |
| cg03957124 | II | 37 | 6  | 37016869                  | 0.5  | 0.00432  | 2.36443 | 0.44206152 | 0.245029308 | 0.197  |
| cg04153882 | I  | 37 | 7  | 5270928 WIPI2;WIPI2;WIPI2 | 0.54 | 0.0014   | 2.85345 | 0.6381336  | 0.440837558 | 0.197  |
| cg07807757 | II | 37 | 7  | 50894570                  | 0.58 | 0.00041  | 3.39184 | 0.4654222  | 0.662197993 | -0.197 |
| cg20450123 | II | 37 | 8  | 19540210 CSGALNACT1;CSGA  | 0.5  | 0.00432  | 2.36443 | 0.35687893 | 0.553915904 | -0.197 |
| cg16335643 | II | 37 | 8  | 101569405 ANKRD46         | 0.54 | 0.0014   | 2.85345 | 0.65678208 | 0.853298426 | -0.197 |
| cg00005619 | II | 37 | 11 | 47608722 FAM180B          | 0.54 | 0.0014   | 2.85345 | 0.62105359 | 0.818130134 | -0.197 |
| cg09175485 | II | 37 | 11 | 67020555 KDM2A;KDM2A      | 0.46 | 0.01197  | 1.92207 | 0.29652886 | 0.493915473 | -0.197 |
| cg20140034 | II | 37 | 11 | 111250355 POU2AF1         | 0.46 | 0.01197  | 1.92207 | 0.46736163 | 0.270004173 | 0.197  |
| cg14830166 | II | 37 | 12 | 11821908 ETV6             | 0.58 | 0.00041  | 3.39184 | 0.2618173  | 0.458722332 | -0.197 |
| cg08164191 | II | 37 | 14 | 65623632                  | 0.46 | 0.01197  | 1.92207 | 0.39742871 | 0.594334107 | -0.197 |
| cg20417351 | II | 37 | 17 | 424358 VPS53              | 0.5  | 0.00432  | 2.36443 | 0.56619776 | 0.762784283 | -0.197 |
| cg14018648 | II | 37 | 17 | 7083015 ASGR1             | 0.62 | 0.0001   | 3.98291 | 0.48702532 | 0.684343334 | -0.197 |
| cg08044694 | II | 37 | 19 | 15391927 BRD4;BRD4        | 0.46 | 0.01197  | 1.92207 | 0.41577391 | 0.612369145 | -0.197 |
| cg01613294 | II | 37 | 22 | 36557607 APOL3;APOL3;APOI | 0.54 | 0.0014   | 2.85345 | 0.56969346 | 0.37276235  | 0.197  |

|            |    |    |    |                           |      |          |         |            |             |        |
|------------|----|----|----|---------------------------|------|----------|---------|------------|-------------|--------|
| cg13798679 | II | 37 | 1  | 36617570                  | 0.54 | 0.0014   | 2.85345 | 0.52264872 | 0.32637226  | 0.196  |
| cg20240347 | I  | 37 | 1  | 204465584                 | 0.54 | 0.0014   | 2.85345 | 0.57714759 | 0.380881533 | 0.196  |
| cg06721411 | II | 37 | 2  | 74753759 DQX1             | 0.5  | 0.00432  | 2.36443 | 0.35604595 | 0.552544104 | -0.196 |
| cg27368523 | II | 37 | 2  | 113544348 IL1A            | 0.46 | 0.01197  | 1.92207 | 0.29343872 | 0.489505185 | -0.196 |
| cg14652403 | I  | 37 | 4  | 993803 IDUA               | 0.62 | 0.0001   | 3.98291 | 0.55445784 | 0.358842272 | 0.196  |
| cg00802478 | II | 37 | 4  | 40588553 RBM47            | 0.58 | 0.00041  | 3.39184 | 0.24493331 | 0.440802563 | -0.196 |
| cg03840351 | II | 37 | 5  | 290917 PDCD6              | 0.5  | 0.00432  | 2.36443 | 0.76582284 | 0.569792629 | 0.196  |
| cg22809017 | II | 37 | 5  | 169373347 FAM196B;DOCK2   | 0.67 | 2.34E-05 | 4.63072 | 0.57146656 | 0.767160138 | -0.196 |
| cg19878482 | I  | 37 | 8  | 144655026 C8orf73         | 0.5  | 0.00432  | 2.36443 | 0.48276247 | 0.678492811 | -0.196 |
| cg26382697 | II | 37 | 11 | 2406712 CD81              | 0.54 | 0.0014   | 2.85345 | 0.40215689 | 0.206041658 | 0.196  |
| cg04353769 | II | 37 | 11 | 59951557 MS4A6A;MS4A6A;N  | 0.54 | 0.0014   | 2.85345 | 0.3794324  | 0.5750745   | -0.196 |
| cg13361558 | I  | 37 | 11 | 73359962 PLEKHB1;PLEKHB1; | 0.54 | 0.0014   | 2.85345 | 0.54179245 | 0.345695117 | 0.196  |
| cg27149179 | II | 37 | 11 | 86451848                  | 0.54 | 0.0014   | 2.85345 | 0.49701239 | 0.692794592 | -0.196 |
| cg14592365 | II | 37 | 11 | 111288100                 | 0.5  | 0.00432  | 2.36443 | 0.35335039 | 0.157620726 | 0.196  |
| cg20997661 | II | 37 | 11 | 125120940 PKNOX2          | 0.5  | 0.00432  | 2.36443 | 0.46708455 | 0.663472566 | -0.196 |
| cg09636302 | I  | 37 | 12 | 96389483 HAL              | 0.5  | 0.00432  | 2.36443 | 0.70545502 | 0.901851048 | -0.196 |
| cg26426437 | I  | 37 | 12 | 121686502 CAMKK2;CAMKK2;( | 0.58 | 0.00041  | 3.39184 | 0.74402771 | 0.54787758  | 0.196  |
| cg26962618 | I  | 37 | 15 | 70767183                  | 0.5  | 0.00432  | 2.36443 | 0.26693111 | 0.463350947 | -0.196 |
| cg00401972 | II | 37 | 16 | 66400404 CDH5             | 0.67 | 2.34E-05 | 4.63072 | 0.43825052 | 0.634197086 | -0.196 |
| cg27027055 | II | 37 | 16 | 79306292                  | 0.58 | 0.00041  | 3.39184 | 0.67495734 | 0.479439707 | 0.196  |
| cg09144769 | II | 37 | 17 | 34053056 AP2B1;AP2B1      | 0.54 | 0.0014   | 2.85345 | 0.56981802 | 0.765654233 | -0.196 |
| cg08857797 | II | 37 | 17 | 40927699 VPS25            | 0.54 | 0.0014   | 2.85345 | 0.44505026 | 0.640993891 | -0.196 |
| cg24726137 | II | 37 | 17 | 74524852 CYGB             | 0.5  | 0.00432  | 2.36443 | 0.49371221 | 0.297936207 | 0.196  |
| cg05604874 | II | 37 | 17 | 80200785                  | 0.46 | 0.01197  | 1.92207 | 0.54992902 | 0.746361504 | -0.196 |
| cg17477806 | I  | 37 | 19 | 4543865 SEMA6B            | 0.54 | 0.0014   | 2.85345 | 0.59371606 | 0.790120342 | -0.196 |
| cg01468567 | II | 37 | 19 | 49843922 TEAD2            | 0.46 | 0.01197  | 1.92207 | 0.47170872 | 0.275588748 | 0.196  |
| cg10126923 | II | 37 | 19 | 51875451 NKG7             | 0.54 | 0.0014   | 2.85345 | 0.42225118 | 0.61823629  | -0.196 |
| cg11806633 | II | 37 | 1  | 17887065 ARHGEF10L        | 0.58 | 0.00041  | 3.39184 | 0.50133476 | 0.696042032 | -0.195 |
| cg01479187 | II | 37 | 2  | 43158610                  | 0.62 | 0.0001   | 3.98291 | 0.38931699 | 0.584785198 | -0.195 |
| cg11752275 | II | 37 | 2  | 85921036 GNLY;GNLY        | 0.54 | 0.0014   | 2.85345 | 0.53005183 | 0.724576138 | -0.195 |
| cg00691123 | II | 37 | 3  | 11632974 VGLL4;VGLL4      | 0.54 | 0.0014   | 2.85345 | 0.68897432 | 0.88390383  | -0.195 |
| cg15501219 | II | 37 | 3  | 44375962                  | 0.5  | 0.00432  | 2.36443 | 0.55410775 | 0.749014453 | -0.195 |
| cg05380759 | II | 37 | 3  | 45579354 LARS2            | 0.67 | 2.34E-05 | 4.63072 | 0.38572493 | 0.581090311 | -0.195 |

|            |    |    |    |                               |      |          |         |            |             |        |
|------------|----|----|----|-------------------------------|------|----------|---------|------------|-------------|--------|
| cg18244487 | I  | 37 | 4  | 681280 MFSD7                  | 0.58 | 0.00041  | 3.39184 | 0.50170987 | 0.696320949 | -0.195 |
| cg03234557 | II | 37 | 4  | 99404186 TSPAN5               | 0.62 | 0.0001   | 3.98291 | 0.74305798 | 0.547913444 | 0.195  |
| cg19769715 | II | 37 | 5  | 149636363 CAMK2A;CAMK2A       | 0.46 | 0.01197  | 1.92207 | 0.67835685 | 0.483257531 | 0.195  |
| cg11562411 | II | 37 | 6  | 35206618 SCUBE3               | 0.62 | 0.0001   | 3.98291 | 0.45796857 | 0.652910955 | -0.195 |
| cg10575547 | II | 37 | 6  | 42283846 TRERF1               | 0.54 | 0.0014   | 2.85345 | 0.50053444 | 0.695823796 | -0.195 |
| cg18995788 | I  | 37 | 8  | 62673444                      | 0.46 | 0.01293  | 1.88854 | 0.74140949 | 0.936766334 | -0.195 |
| cg13718827 | I  | 37 | 9  | 131008520 MIR199B;DNM1;DNM1   | 0.54 | 0.0014   | 2.85345 | 0.65680854 | 0.851522362 | -0.195 |
| cg13807386 | II | 37 | 9  | 139098502 QSOX2               | 0.58 | 0.00041  | 3.39184 | 0.44756232 | 0.642749598 | -0.195 |
| cg18034368 | II | 37 | 10 | 127262250 LOC100169752        | 0.54 | 0.0014   | 2.85345 | 0.6705517  | 0.475503812 | 0.195  |
| cg09854615 | I  | 37 | 11 | 69259788                      | 0.62 | 0.0001   | 3.98291 | 0.71768709 | 0.912690188 | -0.195 |
| cg11035519 | II | 37 | 11 | 130051458 ST14                | 0.5  | 0.00432  | 2.36443 | 0.46402954 | 0.268894119 | 0.195  |
| cg03624316 | II | 37 | 12 | 53693054 PFDN5;C12orf10;PFDN5 | 0.58 | 0.00041  | 3.39184 | 0.39650862 | 0.591954233 | -0.195 |
| cg02867735 | II | 37 | 14 | 22975384                      | 0.5  | 0.00432  | 2.36443 | 0.76649671 | 0.571124663 | 0.195  |
| cg26290716 | II | 37 | 14 | 91862813 CCDC88C              | 0.54 | 0.0014   | 2.85345 | 0.48744056 | 0.682314016 | -0.195 |
| cg19009471 | I  | 37 | 14 | 101908998                     | 0.67 | 2.34E-05 | 4.63072 | 0.40012299 | 0.205305397 | 0.195  |
| cg12626076 | II | 37 | 15 | 92399195 SLCO3A1;SLCO3A1      | 0.54 | 0.0014   | 2.85345 | 0.70904944 | 0.513818201 | 0.195  |
| cg06502279 | II | 37 | 16 | 474467 RAB11FIP3              | 0.58 | 0.00041  | 3.39184 | 0.58560144 | 0.781082038 | -0.195 |
| cg03678039 | I  | 37 | 17 | 74525066 CYGB                 | 0.5  | 0.00432  | 2.36443 | 0.78523181 | 0.590271386 | 0.195  |
| cg04661929 | II | 37 | 17 | 75320035 SEPT9;SEPT9;SEPT9    | 0.54 | 0.0014   | 2.85345 | 0.35624653 | 0.161635235 | 0.195  |
| cg23514211 | I  | 37 | 17 | 79304188 TMEM105;TMEM105      | 0.71 | 4.57E-06 | 5.34042 | 0.55168096 | 0.746662108 | -0.195 |
| cg12106403 | II | 37 | 19 | 667808                        | 0.71 | 4.57E-06 | 5.34042 | 0.28203053 | 0.477509482 | -0.195 |
| cg14389547 | II | 37 | 19 | 3398778 NFIC;NFIC             | 0.54 | 0.0014   | 2.85345 | 0.47744152 | 0.672318829 | -0.195 |
| cg00147638 | II | 37 | 1  | 25228039 RUNX3;RUNX3          | 0.5  | 0.00432  | 2.36443 | 0.79217592 | 0.598071133 | 0.194  |
| cg15694146 | II | 37 | 1  | 27823372                      | 0.46 | 0.01197  | 1.92207 | 0.50018903 | 0.306319553 | 0.194  |
| cg01935086 | II | 37 | 1  | 32674191 IQCC;IQCC;DCDC2B     | 0.5  | 0.00432  | 2.36443 | 0.53609782 | 0.342258418 | 0.194  |
| cg16110541 | I  | 37 | 1  | 68679600 GPR177;GPR177        | 0.46 | 0.01197  | 1.92207 | 0.52950338 | 0.723984958 | -0.194 |
| cg13222915 | II | 37 | 1  | 184598594                     | 0.58 | 0.00041  | 3.39184 | 0.5002196  | 0.694633293 | -0.194 |
| cg20334115 | II | 37 | 1  | 226107899 PYCR2               | 0.62 | 0.0001   | 3.98291 | 0.39228964 | 0.586376797 | -0.194 |
| cg19284751 | II | 37 | 2  | 119699789 MARCO;MARCO         | 0.5  | 0.00432  | 2.36443 | 0.43528994 | 0.629001009 | -0.194 |
| cg17102910 | II | 37 | 7  | 1126249 GPER;C7orf50;C7orf50  | 0.5  | 0.00432  | 2.36443 | 0.52980014 | 0.335387464 | 0.194  |
| cg18041271 | II | 37 | 8  | 11756069                      | 0.54 | 0.0014   | 2.85345 | 0.64918574 | 0.842798709 | -0.194 |
| cg17910564 | II | 37 | 8  | 42248702 VDAC3;VDAC3          | 0.5  | 0.00432  | 2.36443 | 0.71123403 | 0.516991118 | 0.194  |
| cg09376835 | II | 37 | 8  | 131347294 ASAP1               | 0.58 | 0.00041  | 3.39184 | 0.40730311 | 0.60095388  | -0.194 |

|            |    |    |    |           |                   |      |          |         |            |             |        |
|------------|----|----|----|-----------|-------------------|------|----------|---------|------------|-------------|--------|
| cg22637435 | I  | 37 | 8  | 141361108 | TRAPPC9;TRAPPC9   | 0.5  | 0.00432  | 2.36443 | 0.62264348 | 0.81704111  | -0.194 |
| cg24949488 | II | 37 | 10 | 98064362  | DNTT;DNTT         | 0.46 | 0.01197  | 1.92207 | 0.63788071 | 0.443527657 | 0.194  |
| cg24427660 | II | 37 | 11 | 818892    | PNPLA2            | 0.58 | 0.00041  | 3.39184 | 0.52589032 | 0.719943557 | -0.194 |
| cg19546057 | II | 37 | 11 | 128776216 | C11orf45;KCNJ5    | 0.58 | 0.00041  | 3.39184 | 0.33428404 | 0.528159508 | -0.194 |
| cg01668099 | II | 37 | 11 | 130026798 |                   | 0.62 | 0.0001   | 3.98291 | 0.40467665 | 0.598986153 | -0.194 |
| cg14622549 | I  | 37 | 12 | 132549292 | EP400             | 0.46 | 0.01197  | 1.92207 | 0.70266944 | 0.508776203 | 0.194  |
| cg06617636 | I  | 37 | 14 | 69256690  | ZFP36L1           | 0.58 | 0.00041  | 3.39184 | 0.77508613 | 0.580607385 | 0.194  |
| cg09734761 | II | 37 | 16 | 85569506  |                   | 0.58 | 0.00041  | 3.39184 | 0.54953701 | 0.743467233 | -0.194 |
| cg20719001 | II | 37 | 17 | 79297435  | TMEM105           | 0.46 | 0.01197  | 1.92207 | 0.35506687 | 0.549497634 | -0.194 |
| cg22137236 | II | 37 | 18 | 46506533  |                   | 0.54 | 0.0014   | 2.85345 | 0.51199507 | 0.705725551 | -0.194 |
| cg23682913 | II | 37 | 1  | 2080710   | PRKCZ;PRKCZ;PRKC  | 0.46 | 0.01197  | 1.92207 | 0.42630942 | 0.619272503 | -0.193 |
| cg27540865 | I  | 37 | 1  | 243053934 |                   | 0.58 | 0.00041  | 3.39184 | 0.17216505 | 0.365350193 | -0.193 |
| cg00718513 | II | 37 | 2  | 89215272  |                   | 0.46 | 0.01197  | 1.92207 | 0.62934792 | 0.436414053 | 0.193  |
| cg18352516 | II | 37 | 3  | 177315226 |                   | 0.5  | 0.00432  | 2.36443 | 0.31992609 | 0.512603759 | -0.193 |
| cg06305891 | II | 37 | 3  | 195897904 |                   | 0.5  | 0.00432  | 2.36443 | 0.33771437 | 0.530772617 | -0.193 |
| cg12828656 | II | 37 | 5  | 132577108 | FSTL4             | 0.58 | 0.00041  | 3.39184 | 0.34296812 | 0.536288925 | -0.193 |
| cg12117227 | II | 37 | 6  | 485971    | EXOC2             | 0.46 | 0.01197  | 1.92207 | 0.51854241 | 0.325980463 | 0.193  |
| cg00010853 | II | 37 | 6  | 30653167  | KIAA1949;KIAA1949 | 0.62 | 0.0001   | 3.98291 | 0.36133421 | 0.168544556 | 0.193  |
| cg09667606 | I  | 37 | 6  | 158507930 | SYNJ2             | 0.54 | 0.0014   | 2.85345 | 0.54915385 | 0.742639786 | -0.193 |
| cg02850815 | II | 37 | 8  | 144896183 | SCRIB;SCRIB;MIR93 | 0.54 | 0.0014   | 2.85345 | 0.6245903  | 0.817764123 | -0.193 |
| cg12756527 | II | 37 | 10 | 11284548  | CUGBP2;CUGBP2;C   | 0.46 | 0.01197  | 1.92207 | 0.40694908 | 0.214103691 | 0.193  |
| cg12661092 | II | 37 | 10 | 98861029  | SLIT1             | 0.42 | 0.02991  | 1.52413 | 0.5907625  | 0.398172625 | 0.193  |
| cg26391219 | II | 37 | 11 | 3189207   |                   | 0.58 | 0.00041  | 3.39184 | 0.4680715  | 0.661006278 | -0.193 |
| cg24255209 | I  | 37 | 11 | 72863808  |                   | 0.54 | 0.0014   | 2.85345 | 0.69364347 | 0.500197517 | 0.193  |
| cg09680149 | II | 37 | 12 | 6487052   | SCNN1A            | 0.62 | 0.0001   | 3.98291 | 0.54547049 | 0.738794737 | -0.193 |
| cg20181887 | I  | 37 | 12 | 123753272 | CDK2AP1           | 0.42 | 0.02991  | 1.52413 | 0.34968178 | 0.542344512 | -0.193 |
| cg24659858 | I  | 37 | 13 | 24270321  |                   | 0.58 | 0.00041  | 3.39184 | 0.53859337 | 0.345780123 | 0.193  |
| cg18981338 | II | 37 | 14 | 24422419  | DHRS4;C14orf167;C | 0.62 | 0.0001   | 3.98291 | 0.44455466 | 0.637426798 | -0.193 |
| cg19769147 | I  | 37 | 14 | 105860954 | PACS2;PACS2       | 0.71 | 4.57E-06 | 5.34042 | 0.49778035 | 0.690995555 | -0.193 |
| cg08494738 | II | 37 | 16 | 4369512   |                   | 0.58 | 0.00041  | 3.39184 | 0.63220875 | 0.439614133 | 0.193  |
| cg09481483 | II | 37 | 16 | 11734383  |                   | 0.67 | 2.34E-05 | 4.63072 | 0.31277818 | 0.505660185 | -0.193 |
| cg04703221 | II | 37 | 16 | 69967063  | WWP2;MIR140;WV    | 0.46 | 0.01197  | 1.92207 | 0.43261334 | 0.625451478 | -0.193 |
| cg27579854 | II | 37 | 17 | 80818992  | TBCD              | 0.5  | 0.00432  | 2.36443 | 0.65383018 | 0.461265134 | 0.193  |

|            |    |    |    |           |                   |      |          |         |            |             |        |
|------------|----|----|----|-----------|-------------------|------|----------|---------|------------|-------------|--------|
| cg22459924 | II | 37 | 19 | 2607850   | GNG7              | 0.54 | 0.0014   | 2.85345 | 0.65422239 | 0.461546989 | 0.193  |
| cg20117260 | II | 37 | 19 | 41937434  | ATP5SL;ATP5SL;ATF | 0.58 | 0.00041  | 3.39184 | 0.53401742 | 0.727133418 | -0.193 |
| cg19327615 | II | 37 | 20 | 19955436  | RIN2              | 0.54 | 0.0014   | 2.85345 | 0.39119827 | 0.583784557 | -0.193 |
| cg16394290 | II | 37 | 1  | 36788416  | FAM176B           | 0.54 | 0.0014   | 2.85345 | 0.18881867 | 0.380779786 | -0.192 |
| cg07198150 | II | 37 | 1  | 86623101  | COL24A1           | 0.5  | 0.00432  | 2.36443 | 0.4839661  | 0.675554926 | -0.192 |
| cg24197477 | II | 37 | 1  | 202975221 | TMEM183B;TMEM1    | 0.58 | 0.00041  | 3.39184 | 0.67092267 | 0.862584264 | -0.192 |
| cg13359998 | II | 37 | 1  | 230241764 | GALNT2            | 0.5  | 0.00432  | 2.36443 | 0.28948336 | 0.480999372 | -0.192 |
| cg15582102 | II | 37 | 2  | 47746468  |                   | 0.5  | 0.00432  | 2.36443 | 0.82432091 | 0.632691241 | 0.192  |
| cg18329052 | II | 37 | 2  | 219246707 | SLC11A1           | 0.42 | 0.02991  | 1.52413 | 0.29713191 | 0.488746518 | -0.192 |
| cg13388731 | II | 37 | 2  | 220143225 | DNAJB2;DNAJB2     | 0.5  | 0.00432  | 2.36443 | 0.62580472 | 0.433512428 | 0.192  |
| cg24169315 | I  | 37 | 2  | 242048359 | PASK              | 0.54 | 0.0014   | 2.85345 | 0.46141155 | 0.26980653  | 0.192  |
| cg08510456 | II | 37 | 3  | 49591008  | BSN               | 0.5  | 0.00432  | 2.36443 | 0.33318575 | 0.524988467 | -0.192 |
| cg01381934 | I  | 37 | 3  | 52529064  | STAB1             | 0.62 | 0.0001   | 3.98291 | 0.37479896 | 0.567276938 | -0.192 |
| cg20954870 | II | 37 | 5  | 173070254 |                   | 0.5  | 0.00432  | 2.36443 | 0.67201707 | 0.86430159  | -0.192 |
| cg10568066 | I  | 37 | 6  | 30039442  | RNF39;RNF39       | 0.54 | 0.0014   | 2.85345 | 0.12652154 | 0.318473654 | -0.192 |
| cg07346187 | II | 37 | 6  | 149775621 | ZC3H12D           | 0.58 | 0.00041  | 3.39184 | 0.27576408 | 0.468083952 | -0.192 |
| cg25834613 | I  | 37 | 7  | 1915315   | MAD1L1;MAD1L1;M   | 0.5  | 0.00432  | 2.36443 | 0.43966771 | 0.631625575 | -0.192 |
| cg03121834 | II | 37 | 7  | 99970448  | PILRA;PILRA;PILRA | 0.5  | 0.00432  | 2.36443 | 0.38525161 | 0.577398053 | -0.192 |
| cg21210409 | II | 37 | 7  | 140015868 |                   | 0.5  | 0.00432  | 2.36443 | 0.57429725 | 0.766750321 | -0.192 |
| cg04407063 | II | 37 | 11 | 67051977  | ADRBK1            | 0.54 | 0.0014   | 2.85345 | 0.44178595 | 0.633820897 | -0.192 |
| cg13766864 | II | 37 | 11 | 74172851  | KCNE3             | 0.5  | 0.00432  | 2.36443 | 0.6455493  | 0.837927995 | -0.192 |
| cg14343713 | II | 37 | 11 | 74742501  |                   | 0.58 | 0.00041  | 3.39184 | 0.48958308 | 0.681311698 | -0.192 |
| cg14089267 | I  | 37 | 13 | 23412409  |                   | 0.42 | 0.02991  | 1.52413 | 0.43160494 | 0.239385184 | 0.192  |
| cg11366363 | II | 37 | 13 | 51641069  | GUCY1B2           | 0.67 | 2.34E-05 | 4.63072 | 0.51373084 | 0.705268763 | -0.192 |
| cg20847766 | II | 37 | 13 | 111840490 | ARHGEF7;ARHGEF7   | 0.54 | 0.0014   | 2.85345 | 0.65717385 | 0.465258109 | 0.192  |
| cg06618497 | II | 37 | 14 | 102198604 | C14orf72          | 0.62 | 0.0001   | 3.98291 | 0.58282272 | 0.774392797 | -0.192 |
| cg07202353 | II | 37 | 15 | 42210119  | EHD4              | 0.71 | 4.57E-06 | 5.34042 | 0.45268449 | 0.644869038 | -0.192 |
| cg05484949 | I  | 37 | 17 | 38708465  |                   | 0.46 | 0.01197  | 1.92207 | 0.78612563 | 0.594581009 | 0.192  |
| cg08539991 | II | 37 | 19 | 36203832  | ZBTB32;ZBTB32     | 0.58 | 0.00041  | 3.39184 | 0.67323865 | 0.481263136 | 0.192  |
| cg21534299 | II | 37 | 1  | 44821474  | ERI3              | 0.58 | 0.00041  | 3.39184 | 0.63268345 | 0.823343446 | -0.191 |
| cg26394055 | II | 37 | 1  | 161184921 | FCER1G            | 0.54 | 0.0014   | 2.85345 | 0.33063133 | 0.521883745 | -0.191 |
| cg19922137 | I  | 37 | 1  | 210111561 | SYT14;SYT14;SYT14 | 0.54 | 0.0014   | 2.85345 | 0.08245993 | 0.273700659 | -0.191 |
| cg00027232 | II | 37 | 2  | 85547231  | TGOLN2            | 0.58 | 0.00041  | 3.39184 | 0.68584733 | 0.876983625 | -0.191 |

|            |    |    |    |                           |      |          |         |            |             |        |
|------------|----|----|----|---------------------------|------|----------|---------|------------|-------------|--------|
| cg08462501 | II | 37 | 4  | 38138950 TBC1D1           | 0.54 | 0.0014   | 2.85345 | 0.65648907 | 0.847717015 | -0.191 |
| cg06612130 | II | 37 | 4  | 185269299                 | 0.46 | 0.01197  | 1.92207 | 0.52292221 | 0.331674176 | 0.191  |
| cg24721647 | II | 37 | 4  | 185726836 ACSL1           | 0.54 | 0.0014   | 2.85345 | 0.71074293 | 0.519762443 | 0.191  |
| cg18135683 | II | 37 | 5  | 171856063 SH3PXD2B        | 0.62 | 0.0001   | 3.98291 | 0.50386388 | 0.695055018 | -0.191 |
| cg20017123 | I  | 37 | 6  | 2763919                   | 0.54 | 0.0014   | 2.85345 | 0.66255618 | 0.85350439  | -0.191 |
| cg23232773 | II | 37 | 6  | 31431902 HCP5             | 0.5  | 0.00432  | 2.36443 | 0.66504914 | 0.473819179 | 0.191  |
| cg09371409 | I  | 37 | 7  | 1632025                   | 0.46 | 0.01197  | 1.92207 | 0.46265923 | 0.271529483 | 0.191  |
| cg12964697 | II | 37 | 7  | 2140231 MAD1L1;MAD1L1;M   | 0.54 | 0.0014   | 2.85345 | 0.48444041 | 0.293077525 | 0.191  |
| cg04261496 | II | 37 | 7  | 4753002 FOXK1             | 0.42 | 0.02991  | 1.52413 | 0.41471578 | 0.605323681 | -0.191 |
| cg26065247 | II | 37 | 7  | 37734052                  | 0.62 | 0.0001   | 3.98291 | 0.38627113 | 0.577496904 | -0.191 |
| cg19911880 | II | 37 | 8  | 131353969 ASAP1           | 0.58 | 0.00041  | 3.39184 | 0.63923249 | 0.830409892 | -0.191 |
| cg25389145 | II | 37 | 8  | 141220490 TRAPPC9;TRAPPC9 | 0.67 | 2.34E-05 | 4.63072 | 0.59729072 | 0.788685192 | -0.191 |
| cg08081323 | II | 37 | 11 | 57232407 RTN4RL2          | 0.54 | 0.0014   | 2.85345 | 0.5464953  | 0.737837928 | -0.191 |
| cg25752272 | II | 37 | 11 | 61110107 DAK              | 0.62 | 0.0001   | 3.98291 | 0.50986511 | 0.700560774 | -0.191 |
| cg21702188 | II | 37 | 11 | 62574403 STX5;NXF1;NXF1   | 0.46 | 0.01197  | 1.92207 | 0.28837795 | 0.479867535 | -0.191 |
| cg12016746 | II | 37 | 11 | 68084453 LRP5             | 0.54 | 0.0014   | 2.85345 | 0.53286212 | 0.723902884 | -0.191 |
| cg11566441 | II | 37 | 11 | 111887338 DIXDC1;DIXDC1   | 0.46 | 0.01197  | 1.92207 | 0.66646498 | 0.47558026  | 0.191  |
| cg22335223 | I  | 37 | 11 | 117698911 FXYD2           | 0.62 | 0.0001   | 3.98291 | 0.52398003 | 0.33340635  | 0.191  |
| cg00808175 | II | 37 | 12 | 6949119 GNB3              | 0.5  | 0.00432  | 2.36443 | 0.62805887 | 0.437037985 | 0.191  |
| cg12962778 | II | 37 | 12 | 54778312 ZNF385A;ZNF385A; | 0.67 | 2.34E-05 | 4.63072 | 0.53830298 | 0.72904184  | -0.191 |
| cg03514660 | II | 37 | 12 | 131418057                 | 0.58 | 0.00041  | 3.39184 | 0.28345875 | 0.474844711 | -0.191 |
| cg25936902 | II | 37 | 13 | 30982971                  | 0.54 | 0.0014   | 2.85345 | 0.47260892 | 0.663971674 | -0.191 |
| cg16962442 | I  | 37 | 13 | 114828455 RASA3           | 0.58 | 0.00041  | 3.39184 | 0.45721157 | 0.648292096 | -0.191 |
| cg02947214 | II | 37 | 14 | 105998115                 | 0.42 | 0.02991  | 1.52413 | 0.48156118 | 0.290804668 | 0.191  |
| cg08008352 | II | 37 | 16 | 27322356                  | 0.46 | 0.01197  | 1.92207 | 0.44678553 | 0.637842191 | -0.191 |
| cg23770271 | II | 37 | 17 | 3704471 ITGAE;ITGAE       | 0.5  | 0.00432  | 2.36443 | 0.50898466 | 0.699957679 | -0.191 |
| cg23115933 | II | 37 | 17 | 7814172 CHD3;CHD3;CHD3    | 0.54 | 0.0014   | 2.85345 | 0.41646871 | 0.607299761 | -0.191 |
| cg17753124 | II | 37 | 19 | 13259872 IER2;STX10       | 0.58 | 0.00041  | 3.39184 | 0.55616869 | 0.746738529 | -0.191 |
| cg27420674 | II | 37 | 19 | 49974121 ALDH16A1;ALDH16  | 0.5  | 0.00432  | 2.36443 | 0.62945299 | 0.438361988 | 0.191  |
| cg24516259 | I  | 37 | 1  | 2428864 PLCH2             | 0.54 | 0.0014   | 2.85345 | 0.75053706 | 0.560684485 | 0.19   |
| cg20282814 | II | 37 | 1  | 43423072 SLC2A1           | 0.62 | 0.0001   | 3.98291 | 0.81025149 | 0.619888421 | 0.19   |
| cg18854666 | II | 37 | 2  | 219247055 SLC11A1;SLC11A1 | 0.58 | 0.00041  | 3.39184 | 0.42557146 | 0.615108285 | -0.19  |
| cg10621597 | II | 37 | 4  | 140481801                 | 0.54 | 0.0014   | 2.85345 | 0.32868171 | 0.518870255 | -0.19  |

|            |    |    |    |                             |      |          |         |            |             |        |
|------------|----|----|----|-----------------------------|------|----------|---------|------------|-------------|--------|
| cg26209169 | II | 37 | 5  | 1316264                     | 0.58 | 0.00041  | 3.39184 | 0.34394097 | 0.154114426 | 0.19   |
| cg06947286 | II | 37 | 5  | 131596602 PDLIM4;PDLIM4     | 0.54 | 0.0014   | 2.85345 | 0.37709901 | 0.566725897 | -0.19  |
| cg01551441 | II | 37 | 5  | 158477707 EBF1              | 0.54 | 0.0014   | 2.85345 | 0.66455179 | 0.474421413 | 0.19   |
| cg01702055 | II | 37 | 6  | 13303065                    | 0.5  | 0.00432  | 2.36443 | 0.23089789 | 0.420636196 | -0.19  |
| cg18964319 | II | 37 | 6  | 36665554                    | 0.5  | 0.00432  | 2.36443 | 0.37393403 | 0.563441115 | -0.19  |
| cg08442088 | II | 37 | 7  | 44085357 DBNL;DBNL;DBNL     | 0.58 | 0.00041  | 3.39184 | 0.41327124 | 0.603152937 | -0.19  |
| cg06576340 | II | 37 | 7  | 99954188 PILRB;PILRB;PILRB  | 0.5  | 0.00432  | 2.36443 | 0.29541449 | 0.485165289 | -0.19  |
| cg10789956 | II | 37 | 8  | 26467541 DPYSL2             | 0.54 | 0.0014   | 2.85345 | 0.31344405 | 0.503005433 | -0.19  |
| cg13819552 | I  | 37 | 9  | 95799870                    | 0.67 | 2.34E-05 | 4.63072 | 0.44831226 | 0.638343666 | -0.19  |
| cg24838825 | II | 37 | 10 | 111693923                   | 0.5  | 0.00432  | 2.36443 | 0.32407711 | 0.514067156 | -0.19  |
| cg04886849 | II | 37 | 10 | 118997146                   | 0.5  | 0.00432  | 2.36443 | 0.41932803 | 0.608986105 | -0.19  |
| cg25844587 | II | 37 | 15 | 91586374                    | 0.46 | 0.01197  | 1.92207 | 0.57656709 | 0.386649913 | 0.19   |
| cg00201196 | II | 37 | 16 | 8738469 C16orf68            | 0.58 | 0.00041  | 3.39184 | 0.63846581 | 0.828231455 | -0.19  |
| cg03916694 | II | 37 | 17 | 18150707 FLII               | 0.54 | 0.0014   | 2.85345 | 0.41029889 | 0.6004519   | -0.19  |
| cg16810031 | I  | 37 | 17 | 38024146 ZPBP2;ZPBP2        | 0.58 | 0.00041  | 3.39184 | 0.75370441 | 0.563274527 | 0.19   |
| cg23353000 | II | 37 | 17 | 42120896 LSM12              | 0.5  | 0.00432  | 2.36443 | 0.45232921 | 0.642288166 | -0.19  |
| cg08858426 | II | 37 | 17 | 75273896                    | 0.67 | 2.34E-05 | 4.63072 | 0.65966662 | 0.849201628 | -0.19  |
| cg07786220 | I  | 37 | 17 | 78683082 RPTOR;RPTOR        | 0.46 | 0.01197  | 1.92207 | 0.5247324  | 0.71506368  | -0.19  |
| cg02251850 | II | 37 | 17 | 78851503 RPTOR;RPTOR        | 0.5  | 0.00432  | 2.36443 | 0.5432078  | 0.353396923 | 0.19   |
| cg10039047 | I  | 37 | 17 | 80922528 B3GNTL1            | 0.58 | 0.00041  | 3.39184 | 0.58213549 | 0.392030942 | 0.19   |
| cg17344770 | II | 37 | 19 | 3537694 C19orf71            | 0.46 | 0.01197  | 1.92207 | 0.58222105 | 0.772653378 | -0.19  |
| cg27172287 | II | 37 | 22 | 46974976                    | 0.62 | 0.0001   | 3.98291 | 0.51567451 | 0.706092423 | -0.19  |
| cg06865642 | II | 37 | 22 | 50174028 BRD1;LOC90834      | 0.54 | 0.0014   | 2.85345 | 0.61304272 | 0.802575442 | -0.19  |
| cg23275914 | II | 37 | 1  | 1114914 TTLL10;TTLL10       | 0.54 | 0.0014   | 2.85345 | 0.52243396 | 0.333825945 | 0.189  |
| cg13897348 | II | 37 | 1  | 1549699 MIB2;MIB2;MIB2;N    | 0.5  | 0.00432  | 2.36443 | 0.37422248 | 0.562774601 | -0.189 |
| cg19620994 | II | 37 | 1  | 12774904 AADA3;AADA3        | 0.5  | 0.00432  | 2.36443 | 0.60542858 | 0.794810644 | -0.189 |
| cg07242931 | II | 37 | 1  | 26034297 MAN1C1             | 0.71 | 4.57E-06 | 5.34042 | 0.49985255 | 0.689078678 | -0.189 |
| cg11225405 | II | 37 | 1  | 117038246                   | 0.54 | 0.0014   | 2.85345 | 0.6157161  | 0.804610595 | -0.189 |
| cg08202226 | II | 37 | 1  | 153896590 GATAD2B           | 0.54 | 0.0014   | 2.85345 | 0.42421601 | 0.612762854 | -0.189 |
| cg12079904 | II | 37 | 2  | 43195545                    | 0.58 | 0.00041  | 3.39184 | 0.41161129 | 0.601046682 | -0.189 |
| cg17327171 | II | 37 | 2  | 161156221 RBMS1;RBMS1       | 0.5  | 0.00432  | 2.36443 | 0.45229875 | 0.641645058 | -0.189 |
| cg03771282 | II | 37 | 2  | 198062750 ANKRD44;ANKRD44   | 0.62 | 0.0001   | 3.98291 | 0.62646927 | 0.437865368 | 0.189  |
| cg03887528 | II | 37 | 2  | 231090531 SP140;SP140;SP140 | 0.62 | 0.0001   | 3.98291 | 0.43234276 | 0.242897163 | 0.189  |

|            |    |    |    |                          |      |          |         |            |             |        |
|------------|----|----|----|--------------------------|------|----------|---------|------------|-------------|--------|
| cg04519775 | II | 37 | 2  | 231849693                | 0.54 | 0.0014   | 2.85345 | 0.70409113 | 0.51494293  | 0.189  |
| cg16620233 | II | 37 | 3  | 53781107 CACNA1D;CACNA1I | 0.58 | 0.00041  | 3.39184 | 0.51272339 | 0.701904526 | -0.189 |
| cg06704969 | I  | 37 | 3  | 194797099 C3orf21        | 0.5  | 0.00432  | 2.36443 | 0.64124876 | 0.830038811 | -0.189 |
| cg15270235 | II | 37 | 3  | 195682595                | 0.54 | 0.0014   | 2.85345 | 0.58645193 | 0.775946821 | -0.189 |
| cg26873329 | II | 37 | 5  | 32522933                 | 0.62 | 0.0001   | 3.98291 | 0.59020377 | 0.779482321 | -0.189 |
| cg01143547 | I  | 37 | 6  | 41903527 CCND3;CCND3;CCN | 0.71 | 4.57E-06 | 5.34042 | 0.56409555 | 0.375532261 | 0.189  |
| cg16245431 | II | 37 | 7  | 1005089 COX19            | 0.54 | 0.0014   | 2.85345 | 0.33668218 | 0.525866327 | -0.189 |
| cg03840694 | II | 37 | 7  | 139991704                | 0.54 | 0.0014   | 2.85345 | 0.49011634 | 0.678844598 | -0.189 |
| cg03600318 | II | 37 | 10 | 81708991 SFTPD           | 0.46 | 0.01197  | 1.92207 | 0.54462168 | 0.733193415 | -0.189 |
| cg15994604 | II | 37 | 11 | 34676683 EHF             | 0.67 | 2.34E-05 | 4.63072 | 0.45114578 | 0.639790125 | -0.189 |
| cg12161228 | I  | 37 | 11 | 89224506 NOX4;NOX4;NOX4; | 0.46 | 0.01197  | 1.92207 | 0.07251152 | 0.261718727 | -0.189 |
| cg27041424 | II | 37 | 12 | 6232979 VWF              | 0.5  | 0.00432  | 2.36443 | 0.82251021 | 0.633935248 | 0.189  |
| cg15438951 | II | 37 | 12 | 96389694 HAL             | 0.58 | 0.00041  | 3.39184 | 0.65488506 | 0.84359735  | -0.189 |
| cg24673600 | II | 37 | 14 | 76005929 BATF            | 0.5  | 0.00432  | 2.36443 | 0.79787444 | 0.60868329  | 0.189  |
| cg24405567 | II | 37 | 15 | 70787565                 | 0.5  | 0.00432  | 2.36443 | 0.40723397 | 0.596402201 | -0.189 |
| cg07877964 | II | 37 | 16 | 9023363 USP7             | 0.42 | 0.02991  | 1.52413 | 0.6179632  | 0.429424955 | 0.189  |
| cg19060895 | II | 37 | 17 | 5419436 NLRP1;NLRP1;NLRP | 0.58 | 0.00041  | 3.39184 | 0.39382032 | 0.582361101 | -0.189 |
| cg14012082 | I  | 37 | 17 | 56274407 EPX             | 0.46 | 0.01197  | 1.92207 | 0.51884118 | 0.707655812 | -0.189 |
| cg24489015 | II | 37 | 17 | 56316162 LPO;LPO;LPO     | 0.62 | 0.0001   | 3.98291 | 0.54024085 | 0.728910105 | -0.189 |
| cg21073459 | II | 37 | 19 | 54604098 OSCAR;OSCAR;OSC | 0.58 | 0.00041  | 3.39184 | 0.39485696 | 0.583910239 | -0.189 |
| cg14609407 | II | 37 | 20 | 43883172 SLPI            | 0.58 | 0.00041  | 3.39184 | 0.48864156 | 0.677144735 | -0.189 |
| cg27544405 | II | 37 | 1  | 14108975 PRDM2;PRDM2;PRI | 0.58 | 0.00041  | 3.39184 | 0.51079767 | 0.699283807 | -0.188 |
| cg16555909 | II | 37 | 1  | 23721285 TCEA3           | 0.54 | 0.0014   | 2.85345 | 0.63211045 | 0.820052392 | -0.188 |
| cg21451906 | II | 37 | 1  | 161192549 APOA2          | 0.54 | 0.0014   | 2.85345 | 0.4136067  | 0.601635112 | -0.188 |
| cg22793142 | II | 37 | 1  | 207995752 LOC148696      | 0.42 | 0.02991  | 1.52413 | 0.61009326 | 0.422106316 | 0.188  |
| cg01627252 | II | 37 | 2  | 31397283 CAPN14          | 0.5  | 0.00432  | 2.36443 | 0.68049563 | 0.868202809 | -0.188 |
| cg00901982 | II | 37 | 2  | 70257298                 | 0.67 | 2.34E-05 | 4.63072 | 0.42359425 | 0.611517256 | -0.188 |
| cg05991009 | II | 37 | 2  | 102080674 RFX8           | 0.58 | 0.00041  | 3.39184 | 0.44461709 | 0.632936024 | -0.188 |
| cg06804344 | I  | 37 | 3  | 128778699 GP9            | 0.46 | 0.01197  | 1.92207 | 0.42185538 | 0.233892806 | 0.188  |
| cg09390241 | I  | 37 | 4  | 8174148                  | 0.67 | 2.34E-05 | 4.63072 | 0.4778056  | 0.289472029 | 0.188  |
| cg14049990 | II | 37 | 5  | 1514140 LPCAT1           | 0.5  | 0.00432  | 2.36443 | 0.479126   | 0.667523271 | -0.188 |
| cg05573654 | II | 37 | 5  | 1518179 LPCAT1           | 0.5  | 0.00432  | 2.36443 | 0.56620071 | 0.754421525 | -0.188 |
| cg12845808 | II | 37 | 5  | 141338604 PCDH12;PCDH12  | 0.54 | 0.0014   | 2.85345 | 0.59983614 | 0.787599942 | -0.188 |

|            |    |    |    |                           |      |          |         |            |             |        |
|------------|----|----|----|---------------------------|------|----------|---------|------------|-------------|--------|
| cg06869454 | II | 37 | 6  | 3770466                   | 0.54 | 0.0014   | 2.85345 | 0.61197275 | 0.424339669 | 0.188  |
| cg16137928 | II | 37 | 6  | 30720491                  | 0.58 | 0.00041  | 3.39184 | 0.34558618 | 0.533719013 | -0.188 |
| cg01157951 | II | 37 | 6  | 31540399 LTA;LTA          | 0.67 | 2.34E-05 | 4.63072 | 0.42022104 | 0.232636666 | 0.188  |
| cg08246318 | II | 37 | 6  | 42894099                  | 0.54 | 0.0014   | 2.85345 | 0.65383632 | 0.465430275 | 0.188  |
| cg10389644 | II | 37 | 7  | 1575621 MAFK              | 0.62 | 0.0001   | 3.98291 | 0.42408076 | 0.612124268 | -0.188 |
| cg06971659 | II | 37 | 8  | 27941552 C8orf80          | 0.67 | 2.34E-05 | 4.63072 | 0.4564639  | 0.268044242 | 0.188  |
| cg26953469 | II | 37 | 10 | 31872296                  | 0.62 | 0.0001   | 3.98291 | 0.67613888 | 0.864167282 | -0.188 |
| cg09519218 | II | 37 | 10 | 126390317 FAM53B          | 0.62 | 0.0001   | 3.98291 | 0.37617847 | 0.564016011 | -0.188 |
| cg25427871 | I  | 37 | 11 | 2920735 SLC22A18AS;SLC22. | 0.58 | 0.00041  | 3.39184 | 0.30421392 | 0.492436875 | -0.188 |
| cg04822495 | II | 37 | 12 | 94676688 PLXNC1           | 0.5  | 0.00432  | 2.36443 | 0.36573464 | 0.553493199 | -0.188 |
| cg24178897 | II | 37 | 14 | 69170010                  | 0.54 | 0.0014   | 2.85345 | 0.50276435 | 0.69063958  | -0.188 |
| cg10278046 | II | 37 | 16 | 4802848 ZNF500            | 0.42 | 0.02991  | 1.52413 | 0.63699827 | 0.448750962 | 0.188  |
| cg04045544 | II | 37 | 16 | 27298091                  | 0.5  | 0.00432  | 2.36443 | 0.62855251 | 0.816209019 | -0.188 |
| cg14587065 | II | 37 | 17 | 3807247 P2RX1             | 0.58 | 0.00041  | 3.39184 | 0.51427273 | 0.702183895 | -0.188 |
| cg15787636 | II | 37 | 17 | 80866113 TBCD             | 0.58 | 0.00041  | 3.39184 | 0.6284343  | 0.440670738 | 0.188  |
| cg08034986 | II | 37 | 1  | 26860677 RPS6KA1          | 0.54 | 0.0014   | 2.85345 | 0.4156274  | 0.228344718 | 0.187  |
| cg21113746 | II | 37 | 1  | 59039556                  | 0.54 | 0.0014   | 2.85345 | 0.81107969 | 0.624432107 | 0.187  |
| cg03653817 | II | 37 | 1  | 181065498                 | 0.5  | 0.00432  | 2.36443 | 0.58626111 | 0.399267504 | 0.187  |
| cg06354916 | I  | 37 | 1  | 223738388 CAPN8           | 0.62 | 0.0001   | 3.98291 | 0.49550084 | 0.682258007 | -0.187 |
| cg02829654 | II | 37 | 1  | 236046939                 | 0.5  | 0.00432  | 2.36443 | 0.50882525 | 0.695572327 | -0.187 |
| cg19075787 | I  | 37 | 2  | 105372087                 | 0.5  | 0.00432  | 2.36443 | 0.29062671 | 0.477644778 | -0.187 |
| cg13071069 | II | 37 | 3  | 13005914 IQSEC1;IQSEC1    | 0.54 | 0.0014   | 2.85345 | 0.53836042 | 0.725834675 | -0.187 |
| cg17054060 | I  | 37 | 5  | 3606081                   | 0.46 | 0.01197  | 1.92207 | 0.30644473 | 0.493459072 | -0.187 |
| cg24561419 | II | 37 | 5  | 79553606                  | 0.54 | 0.0014   | 2.85345 | 0.4558184  | 0.642360158 | -0.187 |
| cg22192069 | II | 37 | 6  | 13305324 TBC1D7;TBC1D7;TE | 0.62 | 0.0001   | 3.98291 | 0.72624786 | 0.53922315  | 0.187  |
| cg03591753 | II | 37 | 6  | 35659141 FKBP5            | 0.58 | 0.00041  | 3.39184 | 0.58362064 | 0.770147991 | -0.187 |
| cg23416081 | II | 37 | 6  | 35693573 FKBP5            | 0.67 | 2.34E-05 | 4.63072 | 0.24485339 | 0.432327342 | -0.187 |
| cg02566775 | II | 37 | 6  | 144382964 PLAGL1;PLAGL1   | 0.58 | 0.00041  | 3.39184 | 0.4567526  | 0.643516465 | -0.187 |
| cg01911077 | II | 37 | 11 | 64531743                  | 0.54 | 0.0014   | 2.85345 | 0.29757116 | 0.11029208  | 0.187  |
| cg23896972 | II | 37 | 12 | 122079102 ORAI1           | 0.54 | 0.0014   | 2.85345 | 0.5425307  | 0.355483401 | 0.187  |
| cg14502319 | II | 37 | 12 | 125167409                 | 0.71 | 4.57E-06 | 5.34042 | 0.51009494 | 0.697438982 | -0.187 |
| cg16045731 | II | 37 | 14 | 24777708 LTB4R2;CIDEB     | 0.58 | 0.00041  | 3.39184 | 0.62237631 | 0.809429016 | -0.187 |
| cg07122905 | II | 37 | 14 | 92333765 TC2N;TC2N        | 0.75 | 7.61E-07 | 6.11857 | 0.43764707 | 0.250647888 | 0.187  |

|            |    |    |    |           |                    |      |          |         |            |             |        |
|------------|----|----|----|-----------|--------------------|------|----------|---------|------------|-------------|--------|
| cg03836521 | I  | 37 | 16 | 30721270  | SNORA30;SRCAP      | 0.58 | 0.00041  | 3.39184 | 0.60285698 | 0.789530213 | -0.187 |
| cg22319147 | II | 37 | 16 | 66400599  | CDH5;CDH5          | 0.54 | 0.0014   | 2.85345 | 0.52396567 | 0.710783887 | -0.187 |
| cg05453411 | II | 37 | 16 | 89300123  |                    | 0.62 | 0.0001   | 3.98291 | 0.49883983 | 0.685727876 | -0.187 |
| cg21846903 | II | 37 | 17 | 26697281  | VTN;VTN            | 0.54 | 0.0014   | 2.85345 | 0.51825825 | 0.705529448 | -0.187 |
| cg18406792 | II | 37 | 18 | 13620807  | C18orf1;C18orf1;C1 | 0.46 | 0.01197  | 1.92207 | 0.56517577 | 0.378547042 | 0.187  |
| cg01418951 | II | 37 | 19 | 2486431   |                    | 0.42 | 0.02991  | 1.52413 | 0.46682605 | 0.2793569   | 0.187  |
| cg08244301 | II | 37 | 19 | 17610751  | SLC27A1            | 0.5  | 0.00432  | 2.36443 | 0.36944093 | 0.556084642 | -0.187 |
| cg18467978 | II | 37 | 19 | 47134906  |                    | 0.62 | 0.0001   | 3.98291 | 0.62487471 | 0.811966018 | -0.187 |
| cg00516092 | II | 37 | 20 | 31177275  |                    | 0.54 | 0.0014   | 2.85345 | 0.32139178 | 0.508106334 | -0.187 |
| cg23889010 | II | 37 | 20 | 43882990  | SLPI               | 0.54 | 0.0014   | 2.85345 | 0.57100064 | 0.758415985 | -0.187 |
| cg08155625 | I  | 37 | 21 | 44851244  |                    | 0.67 | 2.34E-05 | 4.63072 | 0.43480167 | 0.248255945 | 0.187  |
| cg15536230 | II | 37 | 21 | 44985092  | HSF2BP             | 0.54 | 0.0014   | 2.85345 | 0.39806768 | 0.584598549 | -0.187 |
| cg22595920 | II | 37 | 1  | 9716050   | C1orf200;PIK3CD    | 0.62 | 0.0001   | 3.98291 | 0.36186962 | 0.547546556 | -0.186 |
| cg20416769 | II | 37 | 1  | 209824825 | LAMB3;LAMB3;LAN    | 0.5  | 0.00432  | 2.36443 | 0.3308073  | 0.517185574 | -0.186 |
| cg13911707 | II | 37 | 1  | 247496404 | ZNF496             | 0.58 | 0.00041  | 3.39184 | 0.50158306 | 0.687435284 | -0.186 |
| cg00710862 | II | 37 | 2  | 85545908  | TGOLN2             | 0.58 | 0.00041  | 3.39184 | 0.48482048 | 0.670779787 | -0.186 |
| cg26047334 | II | 37 | 2  | 218785909 | TNS1               | 0.58 | 0.00041  | 3.39184 | 0.60585054 | 0.419351178 | 0.186  |
| cg05564251 | II | 37 | 2  | 231090640 | SP140;SP140        | 0.54 | 0.0014   | 2.85345 | 0.66438513 | 0.478847612 | 0.186  |
| cg05720721 | II | 37 | 3  | 123803128 |                    | 0.46 | 0.01197  | 1.92207 | 0.42920188 | 0.243313416 | 0.186  |
| cg03640151 | II | 37 | 4  | 8248912   |                    | 0.54 | 0.0014   | 2.85345 | 0.65281354 | 0.838628664 | -0.186 |
| cg06758827 | II | 37 | 5  | 14492774  | TRIO               | 0.58 | 0.00041  | 3.39184 | 0.65354948 | 0.839770971 | -0.186 |
| cg02637031 | II | 37 | 5  | 114887230 |                    | 0.54 | 0.0014   | 2.85345 | 0.46612647 | 0.651756101 | -0.186 |
| cg20726195 | I  | 37 | 6  | 2892148   | SERPINB9           | 0.54 | 0.0014   | 2.85345 | 0.55673272 | 0.371158597 | 0.186  |
| cg06762457 | II | 37 | 6  | 149806635 | ZC3H12D            | 0.58 | 0.00041  | 3.39184 | 0.57830293 | 0.392035399 | 0.186  |
| cg07698196 | II | 37 | 7  | 150485638 | LOC100128542       | 0.54 | 0.0014   | 2.85345 | 0.62784923 | 0.813973978 | -0.186 |
| cg19016062 | II | 37 | 10 | 5904561   | ANKRD16            | 0.5  | 0.00432  | 2.36443 | 0.72097832 | 0.534856452 | 0.186  |
| cg22959742 | II | 37 | 10 | 13913931  | FRMD4A             | 0.54 | 0.0014   | 2.85345 | 0.62363985 | 0.809605554 | -0.186 |
| cg03072035 | II | 37 | 10 | 73076664  |                    | 0.62 | 0.0001   | 3.98291 | 0.56566044 | 0.751442182 | -0.186 |
| cg27449572 | II | 37 | 10 | 100024278 | LOXL4              | 0.54 | 0.0014   | 2.85345 | 0.4209649  | 0.607404756 | -0.186 |
| cg10233454 | II | 37 | 12 | 57529389  | LRP1               | 0.5  | 0.00432  | 2.36443 | 0.4697112  | 0.655493846 | -0.186 |
| cg19257402 | II | 37 | 12 | 132356988 |                    | 0.5  | 0.00432  | 2.36443 | 0.41037911 | 0.596537259 | -0.186 |
| cg03029090 | II | 37 | 15 | 58812960  | LIPC               | 0.5  | 0.00432  | 2.36443 | 0.39348074 | 0.579450929 | -0.186 |
| cg06208158 | II | 37 | 16 | 29168730  |                    | 0.46 | 0.01197  | 1.92207 | 0.315492   | 0.501760281 | -0.186 |

|            |    |    |    |                           |      |          |         |            |             |        |
|------------|----|----|----|---------------------------|------|----------|---------|------------|-------------|--------|
| cg21658670 | II | 37 | 19 | 41930894 BCKDHA;BCKDHA    | 0.5  | 0.00432  | 2.36443 | 0.4624355  | 0.648717574 | -0.186 |
| cg26130864 | II | 37 | 20 | 3208100 SLC4A11           | 0.5  | 0.00432  | 2.36443 | 0.58929489 | 0.775716014 | -0.186 |
| cg21088514 | II | 37 | 21 | 35884376 KCNE1            | 0.67 | 2.34E-05 | 4.63072 | 0.65532519 | 0.840843579 | -0.186 |
| cg10871721 | II | 37 | 21 | 46235052 SUMO3            | 0.54 | 0.0014   | 2.85345 | 0.5151968  | 0.701505497 | -0.186 |
| cg24585377 | II | 37 | 1  | 26857774 RPS6KA1          | 0.58 | 0.00041  | 3.39184 | 0.32067915 | 0.505274674 | -0.185 |
| cg05802386 | II | 37 | 1  | 43422920 SLC2A1           | 0.54 | 0.0014   | 2.85345 | 0.75680409 | 0.57164893  | 0.185  |
| cg03818307 | II | 37 | 1  | 150480534 ECM1;ECM1;ECM1; | 0.58 | 0.00041  | 3.39184 | 0.4443175  | 0.629574002 | -0.185 |
| cg10951380 | II | 37 | 1  | 158029978 KIRREL          | 0.58 | 0.00041  | 3.39184 | 0.51275763 | 0.697921707 | -0.185 |
| cg01902845 | II | 37 | 1  | 214170993 PROX1           | 0.62 | 0.0001   | 3.98291 | 0.44231019 | 0.627340531 | -0.185 |
| cg24936095 | II | 37 | 2  | 109204230 LIMS1           | 0.58 | 0.00041  | 3.39184 | 0.46208892 | 0.646673323 | -0.185 |
| cg20287234 | II | 37 | 2  | 231789465 GPR55           | 0.54 | 0.0014   | 2.85345 | 0.41947501 | 0.604016722 | -0.185 |
| cg00116699 | II | 37 | 2  | 240205260 HDAC4           | 0.5  | 0.00432  | 2.36443 | 0.64909153 | 0.834441605 | -0.185 |
| cg17033891 | II | 37 | 3  | 159852976                 | 0.5  | 0.00432  | 2.36443 | 0.15676981 | 0.341408207 | -0.185 |
| cg08928958 | II | 37 | 5  | 149178783 PPARGC1B        | 0.54 | 0.0014   | 2.85345 | 0.47317894 | 0.658350892 | -0.185 |
| cg17478979 | I  | 37 | 6  | 149772150 ZC3H12D         | 0.5  | 0.00432  | 2.36443 | 0.49841987 | 0.683846344 | -0.185 |
| cg22311403 | II | 37 | 6  | 168352521 MLLT4;MLLT4;MLL | 0.5  | 0.00432  | 2.36443 | 0.85058832 | 0.665134895 | 0.185  |
| cg01259220 | II | 37 | 7  | 914964 C7orf20            | 0.42 | 0.02991  | 1.52413 | 0.70593907 | 0.520709026 | 0.185  |
| cg21855816 | II | 37 | 7  | 1066024 C7orf50;C7orf50;C | 0.5  | 0.00432  | 2.36443 | 0.71688354 | 0.532311924 | 0.185  |
| cg09187338 | II | 37 | 7  | 130588508                 | 0.58 | 0.00041  | 3.39184 | 0.5536807  | 0.738358995 | -0.185 |
| cg24864097 | II | 37 | 10 | 121127614 GRK5            | 0.62 | 0.0001   | 3.98291 | 0.43320612 | 0.618417998 | -0.185 |
| cg13276580 | II | 37 | 10 | 125792941 CHST15          | 0.5  | 0.00432  | 2.36443 | 0.575311   | 0.760545392 | -0.185 |
| cg12394201 | II | 37 | 11 | 43942418                  | 0.5  | 0.00432  | 2.36443 | 0.43595145 | 0.62111226  | -0.185 |
| cg21170682 | II | 37 | 11 | 122205382                 | 0.58 | 0.00041  | 3.39184 | 0.68319227 | 0.868638771 | -0.185 |
| cg15007123 | II | 37 | 12 | 111798634 FAM109A         | 0.5  | 0.00432  | 2.36443 | 0.47296213 | 0.288372415 | 0.185  |
| cg14127336 | II | 37 | 14 | 96180319 TCL1A;TCL1A      | 0.46 | 0.01197  | 1.92207 | 0.45169968 | 0.266984921 | 0.185  |
| cg13164814 | II | 37 | 14 | 103468473 CDC42BPB        | 0.5  | 0.00432  | 2.36443 | 0.74213481 | 0.556725621 | 0.185  |
| cg27664674 | II | 37 | 15 | 63654609 CA12;CA12        | 0.54 | 0.0014   | 2.85345 | 0.74628209 | 0.561145553 | 0.185  |
| cg07076836 | II | 37 | 15 | 65175729                  | 0.54 | 0.0014   | 2.85345 | 0.2159206  | 0.401343452 | -0.185 |
| cg03549146 | I  | 37 | 16 | 69966902 MIR140;WWP2;WV   | 0.46 | 0.01197  | 1.92207 | 0.75285445 | 0.937521864 | -0.185 |
| cg06987053 | II | 37 | 16 | 87947779 CA5A             | 0.62 | 0.0001   | 3.98291 | 0.51773735 | 0.702238896 | -0.185 |
| cg18709110 | I  | 37 | 17 | 1094555                   | 0.62 | 0.0001   | 3.98291 | 0.65284194 | 0.838271943 | -0.185 |
| cg24678438 | II | 37 | 17 | 79484403                  | 0.5  | 0.00432  | 2.36443 | 0.47474204 | 0.289371415 | 0.185  |
| cg19787694 | I  | 37 | 19 | 846117 PRTN3              | 0.46 | 0.01197  | 1.92207 | 0.55330534 | 0.738676223 | -0.185 |

|            |    |    |    |           |                  |      |          |         |            |             |        |
|------------|----|----|----|-----------|------------------|------|----------|---------|------------|-------------|--------|
| cg07366300 | II | 37 | 19 | 41934715  | B3GNT8           | 0.67 | 2.34E-05 | 4.63072 | 0.40619654 | 0.591328181 | -0.185 |
| cg02737268 | I  | 37 | 20 | 3780182   | CDC25B;CDC25B;CI | 0.58 | 0.00041  | 3.39184 | 0.37043777 | 0.185137263 | 0.185  |
| cg26703511 | I  | 37 | 21 | 44817420  |                  | 0.58 | 0.00041  | 3.39184 | 0.71135145 | 0.525860756 | 0.185  |
| cg24074477 | II | 37 | 22 | 17956455  | CECR2            | 0.54 | 0.0014   | 2.85345 | 0.54520688 | 0.729717159 | -0.185 |
| cg25076881 | II | 37 | 1  | 159409836 | OR10J1           | 0.54 | 0.0014   | 2.85345 | 0.74638071 | 0.562230876 | 0.184  |
| cg13188263 | II | 37 | 1  | 160517539 | CD84             | 0.42 | 0.02991  | 1.52413 | 0.55909244 | 0.375136656 | 0.184  |
| cg05656486 | II | 37 | 1  | 161171383 | NDUFS2;NDUFS2    | 0.54 | 0.0014   | 2.85345 | 0.39958859 | 0.583321329 | -0.184 |
| cg23738708 | II | 37 | 1  | 206240661 | C1orf186         | 0.58 | 0.00041  | 3.39184 | 0.61291319 | 0.796567006 | -0.184 |
| cg20090162 | I  | 37 | 2  | 47261900  | TTC7A            | 0.42 | 0.02991  | 1.52413 | 0.35376874 | 0.537570446 | -0.184 |
| cg11690884 | II | 37 | 2  | 60533586  |                  | 0.62 | 0.0001   | 3.98291 | 0.24769821 | 0.43126282  | -0.184 |
| cg24721964 | II | 37 | 3  | 150662697 | CLRN1;CLRN1      | 0.46 | 0.01197  | 1.92207 | 0.40044246 | 0.584518268 | -0.184 |
| cg10959668 | II | 37 | 3  | 195897912 |                  | 0.46 | 0.01197  | 1.92207 | 0.4182561  | 0.602353301 | -0.184 |
| cg03720100 | II | 37 | 6  | 30720263  |                  | 0.54 | 0.0014   | 2.85345 | 0.21390047 | 0.398355226 | -0.184 |
| cg18338984 | II | 37 | 7  | 2646955   | IQCE;IQCE        | 0.54 | 0.0014   | 2.85345 | 0.48728489 | 0.671165983 | -0.184 |
| cg14344864 | II | 37 | 7  | 101972144 |                  | 0.42 | 0.02991  | 1.52413 | 0.71061788 | 0.526461376 | 0.184  |
| cg06401414 | I  | 37 | 8  | 141599436 | EIF2C2;EIF2C2    | 0.58 | 0.00041  | 3.39184 | 0.65246962 | 0.468110088 | 0.184  |
| cg14126884 | II | 37 | 9  | 134533116 | RAPGEF1;RAPGEF1  | 0.62 | 0.0001   | 3.98291 | 0.7510518  | 0.567093821 | 0.184  |
| cg01944288 | II | 37 | 9  | 135036217 | NTNG2            | 0.5  | 0.00432  | 2.36443 | 0.33809634 | 0.522346986 | -0.184 |
| cg07011168 | II | 37 | 10 | 49797259  | ARHGAP22         | 0.67 | 2.34E-05 | 4.63072 | 0.55107795 | 0.734775315 | -0.184 |
| cg15580458 | II | 37 | 10 | 121155124 | GRK5             | 0.58 | 0.00041  | 3.39184 | 0.34842243 | 0.532306756 | -0.184 |
| cg04057956 | II | 37 | 12 | 6339200   | CD9              | 0.54 | 0.0014   | 2.85345 | 0.63557185 | 0.819536518 | -0.184 |
| cg25015038 | II | 37 | 14 | 89604062  |                  | 0.54 | 0.0014   | 2.85345 | 0.34252127 | 0.52609544  | -0.184 |
| cg04352288 | I  | 37 | 16 | 87958407  | CA5A             | 0.5  | 0.00432  | 2.36443 | 0.7124173  | 0.528091019 | 0.184  |
| cg02525435 | II | 37 | 16 | 88977768  | CBFA2T3;CBFA2T3  | 0.42 | 0.02991  | 1.52413 | 0.51702671 | 0.333092554 | 0.184  |
| cg26960939 | II | 37 | 17 | 38717206  | CCR7             | 0.5  | 0.00432  | 2.36443 | 0.32237049 | 0.138499199 | 0.184  |
| cg15649236 | II | 37 | 17 | 46657504  | MIR10A           | 0.62 | 0.0001   | 3.98291 | 0.23988897 | 0.423593823 | -0.184 |
| cg21715751 | II | 37 | 19 | 33795390  | LOC80054         | 0.54 | 0.0014   | 2.85345 | 0.4382467  | 0.622369581 | -0.184 |
| cg26633373 | II | 37 | 19 | 54377836  | MYADM;MYADM;N    | 0.54 | 0.0014   | 2.85345 | 0.55521888 | 0.739016136 | -0.184 |
| cg14030719 | II | 37 | 20 | 32266794  | E2F1             | 0.46 | 0.01197  | 1.92207 | 0.60673371 | 0.422645231 | 0.184  |
| cg19593285 | I  | 37 | 20 | 32267661  | E2F1             | 0.62 | 0.0001   | 3.98291 | 0.78071262 | 0.596515922 | 0.184  |
| cg22726155 | II | 37 | 21 | 45575559  |                  | 0.54 | 0.0014   | 2.85345 | 0.65792605 | 0.473998501 | 0.184  |
| cg15121304 | II | 37 | 22 | 22380100  |                  | 0.42 | 0.02991  | 1.52413 | 0.50614872 | 0.322385477 | 0.184  |
| cg23659250 | II | 37 | 22 | 50174065  | BRD1;LOC90834    | 0.58 | 0.00041  | 3.39184 | 0.61083473 | 0.794919161 | -0.184 |

|            |    |    |    |           |                    |      |          |         |            |             |        |
|------------|----|----|----|-----------|--------------------|------|----------|---------|------------|-------------|--------|
| cg03693486 | II | 37 | 1  | 20914322  | CDA                | 0.5  | 0.00432  | 2.36443 | 0.53816284 | 0.721443746 | -0.183 |
| cg09725874 | II | 37 | 1  | 27480106  | SLC9A1             | 0.58 | 0.00041  | 3.39184 | 0.53470035 | 0.351768913 | 0.183  |
| cg17329534 | II | 37 | 1  | 154980743 | ZBTB7B             | 0.46 | 0.01197  | 1.92207 | 0.29187394 | 0.474627608 | -0.183 |
| cg10075819 | II | 37 | 2  | 109229337 | LIMS1              | 0.54 | 0.0014   | 2.85345 | 0.67393257 | 0.491174243 | 0.183  |
| cg17781925 | II | 37 | 3  | 49726151  | MST1;MST1;RNF12    | 0.58 | 0.00041  | 3.39184 | 0.53941864 | 0.722317405 | -0.183 |
| cg20299697 | I  | 37 | 3  | 138069423 | MRAS;MRAS          | 0.62 | 0.0001   | 3.98291 | 0.64620346 | 0.829598495 | -0.183 |
| cg16272981 | I  | 37 | 5  | 1489889   | LPCAT1             | 0.54 | 0.0014   | 2.85345 | 0.69046342 | 0.507643531 | 0.183  |
| cg02347002 | II | 37 | 5  | 138719090 | SLC23A1;SLC23A1    | 0.54 | 0.0014   | 2.85345 | 0.41096963 | 0.593832128 | -0.183 |
| cg14646977 | II | 37 | 6  | 30656667  | NRM;KIAA1949       | 0.46 | 0.01197  | 1.92207 | 0.53152679 | 0.348430955 | 0.183  |
| cg10995925 | II | 37 | 6  | 31539601  | LTA;LTA            | 0.58 | 0.00041  | 3.39184 | 0.67862418 | 0.49548345  | 0.183  |
| cg07249939 | II | 37 | 6  | 31867995  | ZBTB12             | 0.42 | 0.02991  | 1.52413 | 0.39822999 | 0.581670373 | -0.183 |
| cg26954951 | II | 37 | 6  | 167507568 |                    | 0.54 | 0.0014   | 2.85345 | 0.43863929 | 0.255398551 | 0.183  |
| cg19920134 | II | 37 | 7  | 38227870  | STARD3NL           | 0.42 | 0.02991  | 1.52413 | 0.53165363 | 0.348488201 | 0.183  |
| cg21210642 | II | 37 | 9  | 100881995 | TRIM14;TRIM14;TR   | 0.54 | 0.0014   | 2.85345 | 0.51070717 | 0.694059429 | -0.183 |
| cg06374610 | II | 37 | 10 | 50328992  |                    | 0.46 | 0.01197  | 1.92207 | 0.68727201 | 0.50425328  | 0.183  |
| cg17737835 | II | 37 | 12 | 2027805   | CACNA2D4;CACNA2    | 0.62 | 0.0001   | 3.98291 | 0.28475097 | 0.467946003 | -0.183 |
| cg17056618 | II | 37 | 13 | 50216117  |                    | 0.58 | 0.00041  | 3.39184 | 0.72435228 | 0.907579436 | -0.183 |
| cg07036035 | II | 37 | 14 | 96133072  | TCL6               | 0.46 | 0.01197  | 1.92207 | 0.62743104 | 0.444524259 | 0.183  |
| cg06856840 | II | 37 | 15 | 80446451  | FAH                | 0.62 | 0.0001   | 3.98291 | 0.32494861 | 0.507948689 | -0.183 |
| cg05413628 | I  | 37 | 16 | 1521656   | CLCN7;CLCN7        | 0.46 | 0.01197  | 1.92207 | 0.54392013 | 0.72717203  | -0.183 |
| cg16286735 | II | 37 | 17 | 45371778  | ITGB3              | 0.42 | 0.02991  | 1.52413 | 0.58196085 | 0.399191206 | 0.183  |
| cg02172058 | II | 37 | 17 | 58499911  | C17orf64;C17orf64  | 0.54 | 0.0014   | 2.85345 | 0.54314717 | 0.725690458 | -0.183 |
| cg11746924 | II | 37 | 17 | 62007912  | CD79B;CD79B;CD79   | 0.58 | 0.00041  | 3.39184 | 0.46589449 | 0.282762146 | 0.183  |
| cg26701815 | II | 37 | 18 | 3446566   | TGIF1;TGIF1        | 0.5  | 0.00432  | 2.36443 | 0.52109583 | 0.703943513 | -0.183 |
| cg09432758 | II | 37 | 19 | 1649123   | TCF3;TCF3          | 0.46 | 0.01197  | 1.92207 | 0.52856327 | 0.345929171 | 0.183  |
| cg10583119 | II | 37 | 19 | 54237755  | MIR518D            | 0.5  | 0.00432  | 2.36443 | 0.44459702 | 0.26194389  | 0.183  |
| cg18447740 | II | 37 | 19 | 54604187  | OSCAR;OSCAR;OSC    | 0.58 | 0.00041  | 3.39184 | 0.32828492 | 0.510923034 | -0.183 |
| cg13733708 | II | 37 | 20 | 44597685  | ZNF335             | 0.58 | 0.00041  | 3.39184 | 0.62696255 | 0.809913564 | -0.183 |
| cg08139729 | II | 37 | 1  | 41984243  | HIVEP3;HIVEP3      | 0.46 | 0.01197  | 1.92207 | 0.70110213 | 0.518794941 | 0.182  |
| cg08127462 | II | 37 | 1  | 153514264 | S100A5             | 0.58 | 0.00041  | 3.39184 | 0.57167308 | 0.754156899 | -0.182 |
| cg02543462 | II | 37 | 2  | 113885116 | IL1RN;IL1RN;IL1RN; | 0.5  | 0.00432  | 2.36443 | 0.27792012 | 0.459703098 | -0.182 |
| cg03192919 | II | 37 | 3  | 48412245  | FBXW12;FBXW12;F    | 0.54 | 0.0014   | 2.85345 | 0.43326201 | 0.614985024 | -0.182 |
| cg10627428 | II | 37 | 3  | 122514814 | DIRC2              | 0.71 | 4.57E-06 | 5.34042 | 0.35447239 | 0.536515131 | -0.182 |

|            |    |    |    |                           |      |         |         |            |             |        |
|------------|----|----|----|---------------------------|------|---------|---------|------------|-------------|--------|
| cg19118972 | II | 37 | 3  | 184323327                 | 0.5  | 0.00432 | 2.36443 | 0.57586426 | 0.758288815 | -0.182 |
| cg01938023 | II | 37 | 5  | 138855699 TMEM173         | 0.58 | 0.00041 | 3.39184 | 0.4464049  | 0.628530537 | -0.182 |
| cg01538969 | II | 37 | 6  | 30624636 DHX16;DHX16      | 0.58 | 0.00041 | 3.39184 | 0.56374098 | 0.745414472 | -0.182 |
| cg03120555 | I  | 37 | 7  | 630473 PRKAR1B;PRKAR1B    | 0.42 | 0.02991 | 1.52413 | 0.29032214 | 0.472641669 | -0.182 |
| cg03796224 | II | 37 | 8  | 30383628 RBPMS;RBPMS;RBF  | 0.42 | 0.02991 | 1.52413 | 0.74292947 | 0.561092216 | 0.182  |
| cg13740985 | II | 37 | 9  | 80930413 PSAT1;PSAT1      | 0.58 | 0.00041 | 3.39184 | 0.23501542 | 0.417051789 | -0.182 |
| cg11261261 | II | 37 | 10 | 128772459 DOCK1           | 0.54 | 0.0014  | 2.85345 | 0.67112208 | 0.489383838 | 0.182  |
| cg18112681 | II | 37 | 11 | 63303399 RARRES3          | 0.5  | 0.00432 | 2.36443 | 0.53293227 | 0.71524851  | -0.182 |
| cg22110158 | II | 37 | 11 | 130036542 ST14            | 0.54 | 0.0014  | 2.85345 | 0.60461223 | 0.422487172 | 0.182  |
| cg26021714 | II | 37 | 14 | 21424117 RNASE2           | 0.54 | 0.0014  | 2.85345 | 0.59482201 | 0.776678759 | -0.182 |
| cg07989851 | II | 37 | 15 | 38117466                  | 0.58 | 0.00041 | 3.39184 | 0.39342711 | 0.57528364  | -0.182 |
| cg14004161 | I  | 37 | 15 | 64442561 SNX22            | 0.46 | 0.01197 | 1.92207 | 0.27783923 | 0.459619279 | -0.182 |
| cg07196571 | I  | 37 | 15 | 64442578 SNX22            | 0.46 | 0.01197 | 1.92207 | 0.36329802 | 0.545543851 | -0.182 |
| cg16778107 | II | 37 | 16 | 381873 AXIN1;AXIN1        | 0.54 | 0.0014  | 2.85345 | 0.54497521 | 0.726965728 | -0.182 |
| cg09050670 | I  | 37 | 16 | 1521617 CLCN7;CLCN7       | 0.54 | 0.0014  | 2.85345 | 0.16492607 | 0.346825197 | -0.182 |
| cg12125117 | II | 37 | 16 | 57701461 GPR97            | 0.62 | 0.0001  | 3.98291 | 0.45563268 | 0.637912168 | -0.182 |
| cg16392942 | II | 37 | 16 | 89909677 SPIRE2           | 0.62 | 0.0001  | 3.98291 | 0.43391691 | 0.615716979 | -0.182 |
| cg27039898 | I  | 37 | 17 | 79799411                  | 0.46 | 0.01197 | 1.92207 | 0.73990814 | 0.922353033 | -0.182 |
| cg22707397 | I  | 37 | 19 | 49020528                  | 0.54 | 0.0014  | 2.85345 | 0.6172913  | 0.435300852 | 0.182  |
| cg21685427 | II | 37 | 20 | 42187356 SGK2             | 0.46 | 0.01197 | 1.92207 | 0.67035323 | 0.852426785 | -0.182 |
| cg22954818 | II | 37 | 22 | 39354115 APOBEC3A         | 0.58 | 0.00041 | 3.39184 | 0.53358141 | 0.715287478 | -0.182 |
| cg22627753 | II | 37 | 1  | 988623 AGRN               | 0.5  | 0.00432 | 2.36443 | 0.79136693 | 0.61083939  | 0.181  |
| cg24955196 | I  | 37 | 1  | 154982621 ZBTB7B          | 0.54 | 0.0014  | 2.85345 | 0.56858501 | 0.749410852 | -0.181 |
| cg14919082 | II | 37 | 2  | 54901055                  | 0.54 | 0.0014  | 2.85345 | 0.50910209 | 0.690531382 | -0.181 |
| cg05007997 | II | 37 | 2  | 219246985 SLC11A1;SLC11A1 | 0.58 | 0.00041 | 3.39184 | 0.41956664 | 0.600146152 | -0.181 |
| cg16788857 | II | 37 | 3  | 192577951 C3orf59         | 0.42 | 0.02991 | 1.52413 | 0.62718826 | 0.446241118 | 0.181  |
| cg24560729 | I  | 37 | 4  | 1342394 KIAA1530          | 0.5  | 0.00432 | 2.36443 | 0.75911768 | 0.940285319 | -0.181 |
| cg16223546 | II | 37 | 5  | 158768976                 | 0.5  | 0.00432 | 2.36443 | 0.28968024 | 0.470469466 | -0.181 |
| cg07768103 | I  | 37 | 5  | 175956344 RNF44           | 0.5  | 0.00432 | 2.36443 | 0.69116203 | 0.510602399 | 0.181  |
| cg24219974 | II | 37 | 6  | 14729722                  | 0.58 | 0.00041 | 3.39184 | 0.56604703 | 0.384862219 | 0.181  |
| cg05642546 | II | 37 | 7  | 37298927 ELMO1            | 0.58 | 0.00041 | 3.39184 | 0.48316565 | 0.664077731 | -0.181 |
| cg23258615 | II | 37 | 10 | 81961468 ANXA11;ANXA11;A  | 0.5  | 0.00432 | 2.36443 | 0.34677619 | 0.528085053 | -0.181 |
| cg12807237 | II | 37 | 10 | 134729045                 | 0.42 | 0.02991 | 1.52413 | 0.56134967 | 0.380742408 | 0.181  |

|            |    |    |    |                             |  |      |          |         |            |             |        |
|------------|----|----|----|-----------------------------|--|------|----------|---------|------------|-------------|--------|
| cg10927968 | I  | 37 | 11 | 1807333                     |  | 0.5  | 0.00432  | 2.36443 | 0.61934884 | 0.800392143 | -0.181 |
| cg24909660 | II | 37 | 11 | 47276469 NR1H3              |  | 0.62 | 0.0001   | 3.98291 | 0.39149534 | 0.572654021 | -0.181 |
| cg13048008 | II | 37 | 11 | 71725340 NUMA1              |  | 0.71 | 4.57E-06 | 5.34042 | 0.54225456 | 0.723224058 | -0.181 |
| cg02423534 | II | 37 | 12 | 49160180 ADCY6;ADCY6        |  | 0.54 | 0.0014   | 2.85345 | 0.52869013 | 0.709339277 | -0.181 |
| cg04036049 | I  | 37 | 12 | 57923710 MBD6               |  | 0.54 | 0.0014   | 2.85345 | 0.7184129  | 0.89977295  | -0.181 |
| cg00748494 | I  | 37 | 13 | 23412343                    |  | 0.42 | 0.02991  | 1.52413 | 0.41033747 | 0.229785924 | 0.181  |
| cg16728323 | II | 37 | 13 | 111212174 RAB20             |  | 0.58 | 0.00041  | 3.39184 | 0.69266411 | 0.87317328  | -0.181 |
| cg01424562 | II | 37 | 14 | 69256677 ZFP36L1            |  | 0.58 | 0.00041  | 3.39184 | 0.68994209 | 0.509090144 | 0.181  |
| cg25582185 | I  | 37 | 14 | 106032933                   |  | 0.54 | 0.0014   | 2.85345 | 0.46621034 | 0.285345012 | 0.181  |
| cg27184903 | II | 37 | 15 | 29285727 APBA2;APBA2        |  | 0.54 | 0.0014   | 2.85345 | 0.37051313 | 0.551348664 | -0.181 |
| cg08180028 | II | 37 | 15 | 41796044 LTK;LTK;LTK        |  | 0.62 | 0.0001   | 3.98291 | 0.49204022 | 0.673436394 | -0.181 |
| cg06527213 | II | 37 | 15 | 86315211 KLHL25;MIR1276     |  | 0.62 | 0.0001   | 3.98291 | 0.60263952 | 0.783417001 | -0.181 |
| cg10313337 | II | 37 | 16 | 68823690 CDH1               |  | 0.62 | 0.0001   | 3.98291 | 0.64641289 | 0.827817825 | -0.181 |
| cg11692409 | II | 37 | 17 | 1665181 SERPINF1            |  | 0.58 | 0.00041  | 3.39184 | 0.55592648 | 0.737079799 | -0.181 |
| cg02294870 | II | 37 | 17 | 41479663                    |  | 0.5  | 0.00432  | 2.36443 | 0.63093792 | 0.44963198  | 0.181  |
| cg25291653 | II | 37 | 20 | 19867145                    |  | 0.58 | 0.00041  | 3.39184 | 0.70294616 | 0.883514877 | -0.181 |
| cg04776489 | II | 37 | 22 | 22597965 VPREB1             |  | 0.46 | 0.01197  | 1.92207 | 0.52535198 | 0.344781823 | 0.181  |
| cg04223044 | II | 37 | 22 | 45608428 C22orf9;C22orf9    |  | 0.54 | 0.0014   | 2.85345 | 0.64061234 | 0.822096105 | -0.181 |
| cg02058628 | I  | 37 | 1  | 2164542 SKI                 |  | 0.5  | 0.00432  | 2.36443 | 0.52336047 | 0.703695281 | -0.18  |
| cg09517873 | I  | 37 | 1  | 12656315 DHRS3              |  | 0.46 | 0.01197  | 1.92207 | 0.61371434 | 0.794087053 | -0.18  |
| cg19260606 | II | 37 | 1  | 15100030 KIAA1026;KIAA1021  |  | 0.5  | 0.00432  | 2.36443 | 0.49080739 | 0.670520155 | -0.18  |
| cg00326300 | II | 37 | 1  | 33772032                    |  | 0.46 | 0.01197  | 1.92207 | 0.58936052 | 0.408922533 | 0.18   |
| cg09132102 | II | 37 | 1  | 56900436                    |  | 0.67 | 2.34E-05 | 4.63072 | 0.63926442 | 0.459054074 | 0.18   |
| cg21742790 | II | 37 | 3  | 138581702                   |  | 0.62 | 0.0001   | 3.98291 | 0.52464144 | 0.704736058 | -0.18  |
| cg09530650 | II | 37 | 5  | 137024163 KLHL3             |  | 0.58 | 0.00041  | 3.39184 | 0.69371199 | 0.873817284 | -0.18  |
| cg16280132 | I  | 37 | 6  | 31540459 LTA;LTA            |  | 0.62 | 0.0001   | 3.98291 | 0.49466636 | 0.314229135 | 0.18   |
| cg11744817 | II | 37 | 6  | 166876826 RPS6KA2;RPS6KA2   |  | 0.58 | 0.00041  | 3.39184 | 0.16590569 | 0.346112165 | -0.18  |
| cg16409368 | II | 37 | 7  | 128047452 IMPDH1;IMPDH1;IMP |  | 0.5  | 0.00432  | 2.36443 | 0.66282227 | 0.482519611 | 0.18   |
| cg07611843 | II | 37 | 7  | 128453143 CCDC136           |  | 0.67 | 2.34E-05 | 4.63072 | 0.53928803 | 0.718799975 | -0.18  |
| cg09069886 | II | 37 | 8  | 131000415                   |  | 0.5  | 0.00432  | 2.36443 | 0.516766   | 0.696930528 | -0.18  |
| cg04189187 | I  | 37 | 10 | 6183528                     |  | 0.54 | 0.0014   | 2.85345 | 0.90192623 | 0.721538297 | 0.18   |
| cg19148410 | II | 37 | 11 | 111250352 POU2AF1           |  | 0.54 | 0.0014   | 2.85345 | 0.43475372 | 0.254391569 | 0.18   |
| cg19791714 | II | 37 | 11 | 118763901 CXCR5;CXCR5       |  | 0.71 | 4.57E-06 | 5.34042 | 0.52782236 | 0.347360907 | 0.18   |

|            |    |    |    |           |                   |      |          |         |            |             |        |
|------------|----|----|----|-----------|-------------------|------|----------|---------|------------|-------------|--------|
| cg27292547 | II | 37 | 12 | 1672440   |                   | 0.5  | 0.00432  | 2.36443 | 0.52462028 | 0.704705219 | -0.18  |
| cg15460816 | II | 37 | 12 | 25150402  | C12orf77          | 0.42 | 0.02991  | 1.52413 | 0.71271108 | 0.53319909  | 0.18   |
| cg14874216 | II | 37 | 12 | 122651623 | LRRC43            | 0.42 | 0.02991  | 1.52413 | 0.78964092 | 0.609437816 | 0.18   |
| cg01867764 | II | 37 | 14 | 22986466  |                   | 0.46 | 0.01197  | 1.92207 | 0.35527067 | 0.17529878  | 0.18   |
| cg23893332 | II | 37 | 14 | 94576048  | IFI27;IFI27       | 0.5  | 0.00432  | 2.36443 | 0.55736406 | 0.736945473 | -0.18  |
| cg06939852 | II | 37 | 16 | 51068651  |                   | 0.46 | 0.01197  | 1.92207 | 0.40844414 | 0.228576757 | 0.18   |
| cg07377994 | II | 37 | 17 | 55533142  | MSI2;MSI2         | 0.54 | 0.0014   | 2.85345 | 0.28560018 | 0.465219707 | -0.18  |
| cg26534812 | II | 37 | 17 | 75524155  |                   | 0.46 | 0.01197  | 1.92207 | 0.6351678  | 0.454774256 | 0.18   |
| cg08363114 | I  | 37 | 19 | 54711292  | RPS9              | 0.62 | 0.0001   | 3.98291 | 0.68785619 | 0.867664551 | -0.18  |
| cg21211882 | II | 37 | 20 | 34770405  | EPB41L1;EPB41L1   | 0.5  | 0.00432  | 2.36443 | 0.38409207 | 0.563980065 | -0.18  |
| cg21310090 | II | 37 | 20 | 44538669  | PLTP;PLTP         | 0.58 | 0.00041  | 3.39184 | 0.50339327 | 0.683070041 | -0.18  |
| cg26236922 | I  | 37 | 20 | 60912673  | LAMA5             | 0.54 | 0.0014   | 2.85345 | 0.6068838  | 0.426516317 | 0.18   |
| cg00388871 | I  | 37 | 20 | 62530407  | DNAJC5            | 0.46 | 0.01197  | 1.92207 | 0.53454289 | 0.714398392 | -0.18  |
| cg01183122 | II | 37 | 21 | 35884348  | KCNE1             | 0.58 | 0.00041  | 3.39184 | 0.63520733 | 0.815199814 | -0.18  |
| cg12465678 | II | 37 | 1  | 27953336  | FGR;FGR;FGR       | 0.46 | 0.01197  | 1.92207 | 0.3046752  | 0.4832545   | -0.179 |
| cg16815882 | II | 37 | 1  | 35908609  | KIAA0319L         | 0.54 | 0.0014   | 2.85345 | 0.54280142 | 0.72146098  | -0.179 |
| cg08457158 | I  | 37 | 1  | 41367714  |                   | 0.54 | 0.0014   | 2.85345 | 0.49228387 | 0.312883181 | 0.179  |
| cg17734802 | II | 37 | 1  | 54358862  | DIO1;DIO1;DIO1;DI | 0.46 | 0.01197  | 1.92207 | 0.31744548 | 0.496896841 | -0.179 |
| cg21812313 | II | 37 | 1  | 94158618  |                   | 0.62 | 0.0001   | 3.98291 | 0.63979953 | 0.461033404 | 0.179  |
| cg06872185 | II | 37 | 1  | 151831144 |                   | 0.58 | 0.00041  | 3.39184 | 0.60146267 | 0.779992027 | -0.179 |
| cg16586406 | II | 37 | 1  | 154164994 | TPM3              | 0.54 | 0.0014   | 2.85345 | 0.31923738 | 0.498174898 | -0.179 |
| cg05756492 | II | 37 | 1  | 206729685 | RASSF5;RASSF5;RA  | 0.58 | 0.00041  | 3.39184 | 0.75867468 | 0.580173763 | 0.179  |
| cg01623771 | II | 37 | 2  | 239047774 | KLHL30            | 0.46 | 0.01197  | 1.92207 | 0.5329154  | 0.354309501 | 0.179  |
| cg18338046 | II | 37 | 5  | 133452188 | TCF7;TCF7;TCF7;TC | 0.54 | 0.0014   | 2.85345 | 0.72010774 | 0.541414969 | 0.179  |
| cg10120652 | II | 37 | 8  | 9182252   |                   | 0.58 | 0.00041  | 3.39184 | 0.53801361 | 0.71682031  | -0.179 |
| cg14412639 | II | 37 | 9  | 34098451  | DCAF12            | 0.62 | 0.0001   | 3.98291 | 0.8001568  | 0.621338482 | 0.179  |
| cg01544270 | II | 37 | 9  | 140300227 | EXD3              | 0.62 | 0.0001   | 3.98291 | 0.34152463 | 0.520211049 | -0.179 |
| cg18825531 | II | 37 | 11 | 62321136  |                   | 0.46 | 0.01197  | 1.92207 | 0.27017103 | 0.448803381 | -0.179 |
| cg01688936 | II | 37 | 16 | 30770794  | C16orf93          | 0.67 | 2.34E-05 | 4.63072 | 0.47919033 | 0.657983909 | -0.179 |
| cg02814118 | II | 37 | 16 | 81528945  | CMIP;CMIP         | 0.5  | 0.00432  | 2.36443 | 0.16248977 | 0.34112525  | -0.179 |
| cg05938409 | II | 37 | 16 | 85290060  |                   | 0.5  | 0.00432  | 2.36443 | 0.61195869 | 0.43247744  | 0.179  |
| cg14177325 | II | 37 | 17 | 1541763   | SCARF1;SCARF1;SC  | 0.5  | 0.00432  | 2.36443 | 0.58329974 | 0.762688173 | -0.179 |
| cg22443212 | II | 37 | 17 | 78253912  | RNF213;RNF213     | 0.5  | 0.00432  | 2.36443 | 0.61735253 | 0.79683817  | -0.179 |

|            |    |    |    |           |                  |      |          |         |            |             |        |
|------------|----|----|----|-----------|------------------|------|----------|---------|------------|-------------|--------|
| cg01905773 | II | 37 | 17 | 79297618  | TMEM105          | 0.54 | 0.0014   | 2.85345 | 0.47380162 | 0.653051458 | -0.179 |
| cg26620021 | II | 37 | 19 | 40788926  | MIR641;AKT2      | 0.54 | 0.0014   | 2.85345 | 0.73258961 | 0.554043969 | 0.179  |
| cg13760683 | II | 37 | 20 | 46988477  | LOC284749        | 0.67 | 2.34E-05 | 4.63072 | 0.68441315 | 0.50587078  | 0.179  |
| cg16531348 | II | 37 | 21 | 45377217  | AGPAT3;AGPAT3    | 0.46 | 0.01197  | 1.92207 | 0.72602295 | 0.54681307  | 0.179  |
| cg08039560 | I  | 37 | 21 | 45575832  |                  | 0.58 | 0.00041  | 3.39184 | 0.80732369 | 0.628778318 | 0.179  |
| cg03432618 | II | 37 | 22 | 19704196  | Aug-01           | 0.5  | 0.00432  | 2.36443 | 0.75116369 | 0.572177168 | 0.179  |
| cg12509665 | I  | 37 | 22 | 47082044  | CERK             | 0.46 | 0.01197  | 1.92207 | 0.58083012 | 0.759876509 | -0.179 |
| cg20700740 | I  | 37 | 1  | 9339683   |                  | 0.54 | 0.0014   | 2.85345 | 0.71371632 | 0.89220077  | -0.178 |
| cg03537386 | II | 37 | 1  | 32155667  | COL16A1          | 0.62 | 0.0001   | 3.98291 | 0.66626139 | 0.84440263  | -0.178 |
| cg03154580 | II | 37 | 2  | 121009176 | RALB             | 0.46 | 0.01197  | 1.92207 | 0.36225971 | 0.540101878 | -0.178 |
| cg17098979 | II | 37 | 2  | 241562085 |                  | 0.58 | 0.00041  | 3.39184 | 0.25705929 | 0.43461547  | -0.178 |
| cg14630001 | II | 37 | 3  | 66633408  |                  | 0.67 | 2.34E-05 | 4.63072 | 0.4682174  | 0.290247135 | 0.178  |
| cg09668964 | II | 37 | 3  | 129335695 |                  | 0.5  | 0.00432  | 2.36443 | 0.35905823 | 0.537054426 | -0.178 |
| cg06801385 | II | 37 | 5  | 1152362   |                  | 0.58 | 0.00041  | 3.39184 | 0.5574769  | 0.379395093 | 0.178  |
| cg19696103 | I  | 37 | 5  | 132354130 | ZCCHC10          | 0.54 | 0.0014   | 2.85345 | 0.63598227 | 0.813507483 | -0.178 |
| cg00737979 | II | 37 | 5  | 134990285 | LOC340074        | 0.58 | 0.00041  | 3.39184 | 0.71608306 | 0.537921909 | 0.178  |
| cg18643093 | II | 37 | 5  | 150521257 | ANXA6;ANXA6      | 0.62 | 0.0001   | 3.98291 | 0.27429919 | 0.095827903 | 0.178  |
| cg10803218 | II | 37 | 5  | 177544994 | N4BP3            | 0.42 | 0.02991  | 1.52413 | 0.57321946 | 0.395242038 | 0.178  |
| cg24452282 | II | 37 | 6  | 31542740  | TNF              | 0.46 | 0.01197  | 1.92207 | 0.47187259 | 0.294219379 | 0.178  |
| cg06665622 | II | 37 | 6  | 46293571  | RCAN2            | 0.54 | 0.0014   | 2.85345 | 0.75750013 | 0.579688614 | 0.178  |
| cg08601457 | II | 37 | 6  | 112115117 | FYN              | 0.46 | 0.01197  | 1.92207 | 0.27721406 | 0.455223319 | -0.178 |
| cg23143090 | II | 37 | 6  | 169689939 |                  | 0.58 | 0.00041  | 3.39184 | 0.52423879 | 0.702409063 | -0.178 |
| cg01843768 | II | 37 | 7  | 2078650   | MAD1L1;MAD1L1;M  | 0.54 | 0.0014   | 2.85345 | 0.68929583 | 0.51086318  | 0.178  |
| cg20305578 | II | 37 | 8  | 1908301   |                  | 0.54 | 0.0014   | 2.85345 | 0.34594223 | 0.524244763 | -0.178 |
| cg06576318 | II | 37 | 8  | 134249800 | NDRG1;NDRG1      | 0.58 | 0.00041  | 3.39184 | 0.44446527 | 0.622088545 | -0.178 |
| cg04091927 | II | 37 | 8  | 141519270 |                  | 0.46 | 0.01197  | 1.92207 | 0.45020988 | 0.272140762 | 0.178  |
| cg13451093 | II | 37 | 9  | 137040612 |                  | 0.54 | 0.0014   | 2.85345 | 0.63144558 | 0.809927572 | -0.178 |
| cg11169848 | II | 37 | 11 | 67142030  | LOC100130987;CLC | 0.67 | 2.34E-05 | 4.63072 | 0.30028345 | 0.478344265 | -0.178 |
| cg01686739 | II | 37 | 12 | 107855547 | BTBD11           | 0.42 | 0.02991  | 1.52413 | 0.35567845 | 0.533615398 | -0.178 |
| cg05132828 | II | 37 | 12 | 123560479 | PITPNM2          | 0.71 | 4.57E-06 | 5.34042 | 0.46906977 | 0.29122232  | 0.178  |
| cg20911718 | II | 37 | 14 | 24867491  | NYNRIN           | 0.54 | 0.0014   | 2.85345 | 0.51052418 | 0.688933853 | -0.178 |
| cg14191953 | II | 37 | 14 | 107048701 |                  | 0.54 | 0.0014   | 2.85345 | 0.42519575 | 0.247180113 | 0.178  |
| cg02463844 | I  | 37 | 16 | 88152170  |                  | 0.46 | 0.01197  | 1.92207 | 0.51515254 | 0.693252956 | -0.178 |

|            |    |    |    |           |                   |      |          |         |            |             |        |
|------------|----|----|----|-----------|-------------------|------|----------|---------|------------|-------------|--------|
| cg04069539 | II | 37 | 16 | 89168963  | ACSF3;ACSF3;ACSF3 | 0.71 | 4.57E-06 | 5.34042 | 0.63652477 | 0.814919478 | -0.178 |
| cg08003321 | II | 37 | 17 | 8815843   | PIK3R5;PIK3R5     | 0.54 | 0.0014   | 2.85345 | 0.7913915  | 0.613372916 | 0.178  |
| cg07898949 | II | 37 | 17 | 30821957  | MYO1D             | 0.58 | 0.00041  | 3.39184 | 0.59279589 | 0.770409989 | -0.178 |
| cg08939850 | I  | 37 | 17 | 78800806  | RPTOR;RPTOR       | 0.62 | 0.0001   | 3.98291 | 0.2236624  | 0.401644315 | -0.178 |
| cg00926657 | I  | 37 | 17 | 79880822  | MAFG;MAFG         | 0.58 | 0.00041  | 3.39184 | 0.68700911 | 0.864853435 | -0.178 |
| cg00176309 | II | 37 | 21 | 46303258  |                   | 0.62 | 0.0001   | 3.98291 | 0.69554123 | 0.873814245 | -0.178 |
| cg13868520 | II | 37 | 1  | 12139206  | TNFRSF8           | 0.58 | 0.00041  | 3.39184 | 0.73448276 | 0.557002113 | 0.177  |
| cg10708189 | II | 37 | 1  | 58898793  |                   | 0.42 | 0.02991  | 1.52413 | 0.59499364 | 0.418075953 | 0.177  |
| cg18081760 | II | 37 | 1  | 114483597 | HIPK1;HIPK1       | 0.42 | 0.02991  | 1.52413 | 0.34414161 | 0.520896279 | -0.177 |
| cg04705952 | II | 37 | 1  | 160066587 | IGSF8             | 0.71 | 4.57E-06 | 5.34042 | 0.64526965 | 0.821982874 | -0.177 |
| cg25436766 | II | 37 | 2  | 106792426 | UXS1              | 0.5  | 0.00432  | 2.36443 | 0.46407515 | 0.287182094 | 0.177  |
| cg26874367 | II | 37 | 2  | 129381792 |                   | 0.46 | 0.01197  | 1.92207 | 0.18133147 | 0.357919523 | -0.177 |
| cg09681977 | II | 37 | 2  | 240153103 | HDAC4             | 0.54 | 0.0014   | 2.85345 | 0.38720771 | 0.564006423 | -0.177 |
| cg03893701 | II | 37 | 3  | 139395765 | NMNAT3            | 0.67 | 2.34E-05 | 4.63072 | 0.58354054 | 0.760253094 | -0.177 |
| cg05486924 | II | 37 | 3  | 194979565 | C3orf21           | 0.5  | 0.00432  | 2.36443 | 0.39640291 | 0.573149999 | -0.177 |
| cg20969424 | II | 37 | 5  | 73690902  |                   | 0.5  | 0.00432  | 2.36443 | 0.38774483 | 0.565230073 | -0.177 |
| cg02824029 | II | 37 | 6  | 29570008  | GABBR1;GABBR1;G   | 0.5  | 0.00432  | 2.36443 | 0.55259169 | 0.729503297 | -0.177 |
| cg01646461 | II | 37 | 6  | 167536086 | CCR6;CCR6         | 0.5  | 0.00432  | 2.36443 | 0.49244081 | 0.315046404 | 0.177  |
| cg25326952 | II | 37 | 7  | 148720088 | PDIA4             | 0.75 | 7.61E-07 | 6.11857 | 0.54602459 | 0.723404507 | -0.177 |
| cg02854313 | II | 37 | 8  | 19409023  | CSGALNACT1;CSGA   | 0.5  | 0.00432  | 2.36443 | 0.59022632 | 0.767028701 | -0.177 |
| cg13126206 | I  | 37 | 8  | 22930189  |                   | 0.54 | 0.0014   | 2.85345 | 0.4829965  | 0.6604063   | -0.177 |
| cg13650740 | II | 37 | 10 | 80516517  |                   | 0.67 | 2.34E-05 | 4.63072 | 0.36470581 | 0.541260932 | -0.177 |
| cg02921623 | I  | 37 | 10 | 105250537 |                   | 0.62 | 0.0001   | 3.98291 | 0.35176096 | 0.174686779 | 0.177  |
| cg04719721 | II | 37 | 11 | 9787121   |                   | 0.46 | 0.01197  | 1.92207 | 0.53126952 | 0.354314351 | 0.177  |
| cg06526620 | II | 37 | 11 | 94278324  | FUT4              | 0.58 | 0.00041  | 3.39184 | 0.49427874 | 0.670852528 | -0.177 |
| cg04537602 | II | 37 | 11 | 118763859 | CXCR5;CXCR5       | 0.62 | 0.0001   | 3.98291 | 0.61901088 | 0.442441828 | 0.177  |
| cg16303353 | II | 37 | 12 | 2393684   | CACNA1C;CACNA1C   | 0.67 | 2.34E-05 | 4.63072 | 0.43967108 | 0.616379331 | -0.177 |
| cg21163444 | II | 37 | 12 | 54765670  | ZNF385A;ZNF385A;  | 0.71 | 4.57E-06 | 5.34042 | 0.47274693 | 0.650163055 | -0.177 |
| cg19631815 | I  | 37 | 12 | 113528791 | DTX1              | 0.54 | 0.0014   | 2.85345 | 0.87901119 | 0.701656097 | 0.177  |
| cg03646740 | II | 37 | 13 | 114813015 | RASA3             | 0.5  | 0.00432  | 2.36443 | 0.67630793 | 0.49882646  | 0.177  |
| cg02497428 | II | 37 | 16 | 21665138  | METTL9;IGSF6;MET  | 0.5  | 0.00432  | 2.36443 | 0.65680142 | 0.833743872 | -0.177 |
| cg05597945 | II | 37 | 16 | 88059049  | BANP;BANP         | 0.46 | 0.01197  | 1.92207 | 0.34953909 | 0.526066438 | -0.177 |
| cg20309353 | II | 37 | 17 | 18089940  | ALKBH5            | 0.42 | 0.02991  | 1.52413 | 0.43356104 | 0.610195823 | -0.177 |

|            |    |    |    |                             |      |          |         |            |             |        |
|------------|----|----|----|-----------------------------|------|----------|---------|------------|-------------|--------|
| cg04413853 | II | 37 | 17 | 58499706 C17orf64           | 0.58 | 0.00041  | 3.39184 | 0.63213585 | 0.809465262 | -0.177 |
| cg09187107 | I  | 37 | 17 | 79006087 FLJ90757           | 0.5  | 0.00432  | 2.36443 | 0.64457336 | 0.821241106 | -0.177 |
| cg22898924 | II | 37 | 19 | 4903952 ARRDC5              | 0.62 | 0.0001   | 3.98291 | 0.40901602 | 0.586140929 | -0.177 |
| cg25605731 | I  | 37 | 19 | 13054434 CALR               | 0.5  | 0.00432  | 2.36443 | 0.68913613 | 0.865697933 | -0.177 |
| cg11324504 | I  | 37 | 22 | 38474147 SLC16A8            | 0.67 | 2.34E-05 | 4.63072 | 0.57262532 | 0.749676829 | -0.177 |
| cg19851816 | I  | 37 | 22 | 50657907 TUBGCP6            | 0.46 | 0.01197  | 1.92207 | 0.33266443 | 0.509707675 | -0.177 |
| cg05119467 | II | 37 | 1  | 1765440 GNB1                | 0.54 | 0.0014   | 2.85345 | 0.69228858 | 0.516248017 | 0.176  |
| cg20971147 | II | 37 | 1  | 14866944                    | 0.58 | 0.00041  | 3.39184 | 0.53992959 | 0.363436437 | 0.176  |
| cg26558485 | I  | 37 | 1  | 47489282 CYP4X1;CYP4X1      | 0.62 | 0.0001   | 3.98291 | 0.23980712 | 0.416286025 | -0.176 |
| cg24461171 | II | 37 | 1  | 197745025 DENND1B;DENND1    | 0.42 | 0.02991  | 1.52413 | 0.38190985 | 0.557587347 | -0.176 |
| cg04287574 | I  | 37 | 1  | 201619622 NAV1              | 0.42 | 0.02991  | 1.52413 | 0.44815171 | 0.272370835 | 0.176  |
| cg17981790 | II | 37 | 2  | 16807234 FAM49A             | 0.5  | 0.00432  | 2.36443 | 0.49863315 | 0.322297798 | 0.176  |
| cg17051239 | II | 37 | 2  | 27850192 CCDC121;CCDC121    | 0.5  | 0.00432  | 2.36443 | 0.4247797  | 0.600622475 | -0.176 |
| cg07015784 | I  | 37 | 2  | 219257760 SLC11A1           | 0.5  | 0.00432  | 2.36443 | 0.73594075 | 0.559927536 | 0.176  |
| cg15367000 | II | 37 | 2  | 239017149 ESPNL             | 0.42 | 0.02991  | 1.52413 | 0.68622408 | 0.510515614 | 0.176  |
| cg16846518 | II | 37 | 3  | 128062608 EEFSEC            | 0.58 | 0.00041  | 3.39184 | 0.49932634 | 0.675477556 | -0.176 |
| cg06336230 | II | 37 | 3  | 197401572 MIR922;KIAA0226;l | 0.46 | 0.01197  | 1.92207 | 0.69245447 | 0.51662867  | 0.176  |
| cg18763629 | II | 37 | 4  | 1199037 LOC100130872;LOC    | 0.5  | 0.00432  | 2.36443 | 0.59799519 | 0.77441299  | -0.176 |
| cg22318806 | II | 37 | 6  | 31540411 LTA;LTA            | 0.58 | 0.00041  | 3.39184 | 0.41049529 | 0.234323055 | 0.176  |
| cg07188523 | I  | 37 | 6  | 44528793                    | 0.54 | 0.0014   | 2.85345 | 0.64495041 | 0.821217402 | -0.176 |
| cg09377088 | II | 37 | 6  | 108910284 FOXO3;FOXO3       | 0.62 | 0.0001   | 3.98291 | 0.57311922 | 0.749152437 | -0.176 |
| cg06001419 | II | 37 | 7  | 4717725                     | 0.58 | 0.00041  | 3.39184 | 0.57880708 | 0.754832924 | -0.176 |
| cg08930413 | II | 37 | 7  | 151548036 PRKAG2            | 0.71 | 4.57E-06 | 5.34042 | 0.55039252 | 0.726420281 | -0.176 |
| cg21440764 | II | 37 | 8  | 11755993                    | 0.58 | 0.00041  | 3.39184 | 0.64798916 | 0.823783971 | -0.176 |
| cg26610247 | I  | 37 | 8  | 142297175                   | 0.46 | 0.01197  | 1.92207 | 0.52994931 | 0.706139541 | -0.176 |
| cg15721448 | II | 37 | 8  | 144239503 LY6H;LY6H;LY6H    | 0.67 | 2.34E-05 | 4.63072 | 0.37301803 | 0.548689365 | -0.176 |
| cg04190888 | II | 37 | 10 | 49879914                    | 0.42 | 0.02991  | 1.52413 | 0.58968239 | 0.413932423 | 0.176  |
| cg18591228 | II | 37 | 11 | 3175552 OSBPL5;OSBPL5;OS    | 0.54 | 0.0014   | 2.85345 | 0.50472641 | 0.680858045 | -0.176 |
| cg09761846 | II | 37 | 11 | 57117162 P2RX3              | 0.58 | 0.00041  | 3.39184 | 0.65879066 | 0.83476917  | -0.176 |
| cg12808596 | II | 37 | 11 | 60640645 ZP1                | 0.54 | 0.0014   | 2.85345 | 0.59910831 | 0.774997703 | -0.176 |
| cg27246571 | II | 37 | 12 | 96389588 HAL                | 0.54 | 0.0014   | 2.85345 | 0.71200521 | 0.887851037 | -0.176 |
| cg05946118 | I  | 37 | 16 | 8985638                     | 0.46 | 0.01197  | 1.92207 | 0.56042127 | 0.384353956 | 0.176  |
| cg01502811 | II | 37 | 16 | 49869755                    | 0.42 | 0.02991  | 1.52413 | 0.69233912 | 0.515882414 | 0.176  |

|            |    |    |    |                            |      |          |         |            |             |        |
|------------|----|----|----|----------------------------|------|----------|---------|------------|-------------|--------|
| cg02226672 | II | 37 | 16 | 68398533 SMPD3             | 0.62 | 0.0001   | 3.98291 | 0.66950038 | 0.845343642 | -0.176 |
| cg01445100 | II | 37 | 16 | 88103339 BANP;BANP         | 0.54 | 0.0014   | 2.85345 | 0.47490077 | 0.29843429  | 0.176  |
| cg26360197 | II | 37 | 17 | 78821604 RPTOR;RPTOR       | 0.5  | 0.00432  | 2.36443 | 0.59885451 | 0.422740208 | 0.176  |
| cg13484467 | II | 37 | 17 | 81047784 METRNL            | 0.54 | 0.0014   | 2.85345 | 0.67220209 | 0.848495703 | -0.176 |
| cg24339704 | II | 37 | 19 | 2529022 GNG7               | 0.5  | 0.00432  | 2.36443 | 0.70156538 | 0.877538131 | -0.176 |
| cg05921699 | II | 37 | 19 | 42380725 CD79A;CD79A       | 0.54 | 0.0014   | 2.85345 | 0.74553654 | 0.56933829  | 0.176  |
| cg08844849 | II | 37 | 19 | 51921812 SIGLEC10;SIGLEC10 | 0.67 | 2.34E-05 | 4.63072 | 0.56988352 | 0.394173795 | 0.176  |
| cg03730622 | II | 37 | 22 | 46760678 CELSR1            | 0.5  | 0.00432  | 2.36443 | 0.48858638 | 0.312895653 | 0.176  |
| cg03976856 | II | 37 | 1  | 2764669                    | 0.5  | 0.00432  | 2.36443 | 0.6369889  | 0.461935379 | 0.175  |
| cg05710479 | II | 37 | 1  | 7120104 CAMTA1             | 0.5  | 0.00432  | 2.36443 | 0.76366769 | 0.589111932 | 0.175  |
| cg17952939 | I  | 37 | 1  | 9154250                    | 0.58 | 0.00041  | 3.39184 | 0.47681713 | 0.651875812 | -0.175 |
| cg10895547 | II | 37 | 1  | 78071255 ZZZ3              | 0.58 | 0.00041  | 3.39184 | 0.26995856 | 0.444722962 | -0.175 |
| cg25773695 | II | 37 | 1  | 116191657 VANGL1           | 0.54 | 0.0014   | 2.85345 | 0.63826983 | 0.463471751 | 0.175  |
| cg22153407 | II | 37 | 1  | 230290089 GALNT2           | 0.5  | 0.00432  | 2.36443 | 0.67480322 | 0.849554353 | -0.175 |
| cg11256132 | II | 37 | 1  | 244515893 C1orf100         | 0.42 | 0.02991  | 1.52413 | 0.70961413 | 0.534364317 | 0.175  |
| cg05654103 | II | 37 | 2  | 24586381                   | 0.62 | 0.0001   | 3.98291 | 0.69544321 | 0.870140675 | -0.175 |
| cg02708956 | II | 37 | 2  | 240300118 HDAC4            | 0.46 | 0.01197  | 1.92207 | 0.6381172  | 0.813299938 | -0.175 |
| cg18030943 | II | 37 | 3  | 182876556 LAMP3            | 0.54 | 0.0014   | 2.85345 | 0.67866833 | 0.503627281 | 0.175  |
| cg07241925 | II | 37 | 4  | 1294566 MAEA;MAEA          | 0.5  | 0.00432  | 2.36443 | 0.58469292 | 0.759954427 | -0.175 |
| cg06904356 | I  | 37 | 5  | 1849983                    | 0.54 | 0.0014   | 2.85345 | 0.55836155 | 0.732932412 | -0.175 |
| cg15712777 | II | 37 | 5  | 78204392 ARSB;ARSB         | 0.62 | 0.0001   | 3.98291 | 0.21418461 | 0.389198819 | -0.175 |
| cg13948857 | II | 37 | 5  | 131763756 C5orf56          | 0.5  | 0.00432  | 2.36443 | 0.30707442 | 0.481681249 | -0.175 |
| cg02855778 | II | 37 | 7  | 157462914 PTPRN2;PTPRN2;PT | 0.58 | 0.00041  | 3.39184 | 0.42610684 | 0.250796058 | 0.175  |
| cg03454775 | I  | 37 | 8  | 2012595 MYOM2              | 0.58 | 0.00041  | 3.39184 | 0.54724559 | 0.722620256 | -0.175 |
| cg14109456 | II | 37 | 9  | 127040562 NEK6;NEK6;NEK6;N | 0.42 | 0.02991  | 1.52413 | 0.41464504 | 0.589653378 | -0.175 |
| cg13992008 | II | 37 | 9  | 130739838 FAM102A          | 0.5  | 0.00432  | 2.36443 | 0.8241776  | 0.649420198 | 0.175  |
| cg03062944 | I  | 37 | 10 | 6183455                    | 0.58 | 0.00041  | 3.39184 | 0.77256042 | 0.597482519 | 0.175  |
| cg16788050 | I  | 37 | 11 | 8053406                    | 0.42 | 0.02991  | 1.52413 | 0.82426867 | 0.649126195 | 0.175  |
| cg26215727 | II | 37 | 12 | 6485537 SCNN1A;SCNN1A;S    | 0.54 | 0.0014   | 2.85345 | 0.54106911 | 0.71588127  | -0.175 |
| cg12496975 | II | 37 | 12 | 48149863 RAPGEF3;RAPGEF3;  | 0.54 | 0.0014   | 2.85345 | 0.68926538 | 0.51458493  | 0.175  |
| cg18818866 | II | 37 | 12 | 50221061 NCKAP5L;LOC10028  | 0.75 | 7.61E-07 | 6.11857 | 0.64672184 | 0.821663449 | -0.175 |
| cg00115639 | II | 37 | 17 | 54701692                   | 0.42 | 0.02991  | 1.52413 | 0.59983401 | 0.774586457 | -0.175 |
| cg05774614 | II | 37 | 17 | 78864539 RPTOR;RPTOR       | 0.58 | 0.00041  | 3.39184 | 0.46048285 | 0.635878531 | -0.175 |

|            |    |    |    |           |                   |      |          |         |            |             |        |
|------------|----|----|----|-----------|-------------------|------|----------|---------|------------|-------------|--------|
| cg01219924 | II | 37 | 17 | 79004947  | FLJ90757          | 0.58 | 0.00041  | 3.39184 | 0.47079919 | 0.645672812 | -0.175 |
| cg09138892 | I  | 37 | 17 | 79005662  | FLJ90757          | 0.5  | 0.00432  | 2.36443 | 0.6986818  | 0.873397393 | -0.175 |
| cg18050634 | I  | 37 | 17 | 79420145  | BAHCC1            | 0.5  | 0.00432  | 2.36443 | 0.5332734  | 0.358141756 | 0.175  |
| cg26221801 | I  | 37 | 20 | 62183966  | C20orf195         | 0.71 | 4.57E-06 | 5.34042 | 0.55036957 | 0.375011628 | 0.175  |
| cg07507493 | II | 37 | 20 | 62574095  | UCKL1;MIR1914;MI  | 0.46 | 0.01197  | 1.92207 | 0.48724418 | 0.662108785 | -0.175 |
| cg07247610 | II | 37 | 1  | 9097422   | SLC2A5;SLC2A5     | 0.62 | 0.0001   | 3.98291 | 0.68424289 | 0.510169054 | 0.174  |
| cg02927682 | I  | 37 | 1  | 54844424  | SSBP3;SSBP3;SSBP3 | 0.46 | 0.01197  | 1.92207 | 0.24427826 | 0.418637599 | -0.174 |
| cg17933936 | II | 37 | 1  | 226885709 | ITPKB             | 0.58 | 0.00041  | 3.39184 | 0.71495318 | 0.541152754 | 0.174  |
| cg17177006 | II | 37 | 3  | 5232410   | EDEM1             | 0.58 | 0.00041  | 3.39184 | 0.45429902 | 0.280711827 | 0.174  |
| cg07892374 | II | 37 | 3  | 130568122 |                   | 0.62 | 0.0001   | 3.98291 | 0.26772232 | 0.441949484 | -0.174 |
| cg01919999 | II | 37 | 5  | 180668568 | GNB2L1            | 0.58 | 0.00041  | 3.39184 | 0.36620051 | 0.53973312  | -0.174 |
| cg26964592 | II | 37 | 6  | 32904621  | HLA-DMB           | 0.42 | 0.02991  | 1.52413 | 0.54642902 | 0.720517564 | -0.174 |
| cg03595161 | II | 37 | 7  | 1127767   | GPER;C7orf50;GPEF | 0.62 | 0.0001   | 3.98291 | 0.59641949 | 0.770463581 | -0.174 |
| cg13710553 | II | 37 | 7  | 129598625 |                   | 0.54 | 0.0014   | 2.85345 | 0.3558742  | 0.529896934 | -0.174 |
| cg01012242 | II | 37 | 7  | 140043078 | SLC37A3;SLC37A3   | 0.54 | 0.0014   | 2.85345 | 0.40349439 | 0.577799271 | -0.174 |
| cg10225865 | I  | 37 | 8  | 54605566  |                   | 0.42 | 0.02991  | 1.52413 | 0.289078   | 0.463560538 | -0.174 |
| cg25596082 | II | 37 | 10 | 43626561  |                   | 0.67 | 2.34E-05 | 4.63072 | 0.24112709 | 0.414651224 | -0.174 |
| cg04902811 | II | 37 | 10 | 99478719  | LOC100270710      | 0.54 | 0.0014   | 2.85345 | 0.30906216 | 0.482753808 | -0.174 |
| cg18390025 | II | 37 | 10 | 103986736 | ELOVL3            | 0.58 | 0.00041  | 3.39184 | 0.46960588 | 0.643714015 | -0.174 |
| cg13104938 | II | 37 | 11 | 843956    | TSPAN4;TSPAN4;TS  | 0.5  | 0.00432  | 2.36443 | 0.38557374 | 0.559592094 | -0.174 |
| cg01909245 | II | 37 | 11 | 1873757   | LSP1              | 0.58 | 0.00041  | 3.39184 | 0.72118505 | 0.547216659 | 0.174  |
| cg05463966 | II | 37 | 11 | 67803951  | NDUFS8            | 0.54 | 0.0014   | 2.85345 | 0.3143688  | 0.488618497 | -0.174 |
| cg24313592 | II | 37 | 11 | 72020031  | CLPB              | 0.46 | 0.01197  | 1.92207 | 0.71272186 | 0.538292626 | 0.174  |
| cg07367607 | II | 37 | 12 | 131314725 | STX2;STX2         | 0.5  | 0.00432  | 2.36443 | 0.37388525 | 0.199810863 | 0.174  |
| cg15972148 | I  | 37 | 13 | 114880889 | RASA3             | 0.46 | 0.01197  | 1.92207 | 0.41439432 | 0.588092797 | -0.174 |
| cg22991506 | II | 37 | 14 | 50468241  | C14orf182         | 0.67 | 2.34E-05 | 4.63072 | 0.48673868 | 0.312943394 | 0.174  |
| cg09306188 | I  | 37 | 16 | 4733253   | MGRN1;MGRN1;M     | 0.62 | 0.0001   | 3.98291 | 0.76498892 | 0.938695776 | -0.174 |
| cg09426937 | II | 37 | 16 | 70453185  | ST3GAL2           | 0.46 | 0.01197  | 1.92207 | 0.57578898 | 0.401345974 | 0.174  |
| cg24247482 | II | 37 | 17 | 42293627  | UBTF;UBTF;UBTF    | 0.71 | 4.57E-06 | 5.34042 | 0.38325452 | 0.209270409 | 0.174  |
| cg09121543 | I  | 37 | 17 | 61774794  | LIMD2             | 0.75 | 7.61E-07 | 6.11857 | 0.36997598 | 0.196347884 | 0.174  |
| cg07855221 | II | 37 | 17 | 79877314  | MAFG;MAFG;SIRT7   | 0.58 | 0.00041  | 3.39184 | 0.41772787 | 0.591989433 | -0.174 |
| cg23866916 | II | 37 | 19 | 1155738   | SBNO2             | 0.62 | 0.0001   | 3.98291 | 0.60105799 | 0.774824494 | -0.174 |
| cg12002047 | II | 37 | 19 | 7767279   | FCER2             | 0.46 | 0.01197  | 1.92207 | 0.4616318  | 0.287832968 | 0.174  |

|            |    |    |    |           |                   |      |          |         |            |             |        |
|------------|----|----|----|-----------|-------------------|------|----------|---------|------------|-------------|--------|
| cg24168413 | I  | 37 | 19 | 35630388  | FXD1;FXD1         | 0.54 | 0.0014   | 2.85345 | 0.47694642 | 0.651252575 | -0.174 |
| cg21966754 | II | 37 | 19 | 54584816  | TARM1             | 0.46 | 0.01197  | 1.92207 | 0.17682024 | 0.350514934 | -0.174 |
| cg26331247 | II | 37 | 20 | 31239171  | LOC284805         | 0.46 | 0.01197  | 1.92207 | 0.44427952 | 0.270735986 | 0.174  |
| cg00546897 | II | 37 | 21 | 45232232  | LOC284837         | 0.58 | 0.00041  | 3.39184 | 0.4653616  | 0.639123112 | -0.174 |
| cg06624244 | II | 37 | 1  | 16332335  | C1orf64           | 0.54 | 0.0014   | 2.85345 | 0.50516758 | 0.332543023 | 0.173  |
| cg26721382 | II | 37 | 1  | 31196596  | MATN1             | 0.71 | 4.57E-06 | 5.34042 | 0.55338278 | 0.726765539 | -0.173 |
| cg24535918 | II | 37 | 1  | 52429399  | RAB3B             | 0.46 | 0.01197  | 1.92207 | 0.42708791 | 0.25395343  | 0.173  |
| cg17443007 | II | 37 | 1  | 101659419 |                   | 0.54 | 0.0014   | 2.85345 | 0.64238807 | 0.814993885 | -0.173 |
| cg11193281 | II | 37 | 1  | 154547585 | CHRNA2            | 0.5  | 0.00432  | 2.36443 | 0.47372479 | 0.30040686  | 0.173  |
| cg23619936 | II | 37 | 2  | 866258    |                   | 0.54 | 0.0014   | 2.85345 | 0.53748228 | 0.364710599 | 0.173  |
| cg01331275 | II | 37 | 2  | 9908576   |                   | 0.5  | 0.00432  | 2.36443 | 0.4874979  | 0.314707228 | 0.173  |
| cg18008247 | II | 37 | 3  | 124719009 | HEG1              | 0.62 | 0.0001   | 3.98291 | 0.5453523  | 0.718680297 | -0.173 |
| cg03446062 | II | 37 | 6  | 14477353  |                   | 0.46 | 0.01197  | 1.92207 | 0.39165557 | 0.56479123  | -0.173 |
| cg05569328 | II | 37 | 6  | 32044384  | TNXX              | 0.67 | 2.34E-05 | 4.63072 | 0.22568268 | 0.398396016 | -0.173 |
| cg09487078 | II | 37 | 6  | 167525398 | CCR6;CCR6         | 0.54 | 0.0014   | 2.85345 | 0.46677876 | 0.293487407 | 0.173  |
| cg21078077 | I  | 37 | 7  | 997617    |                   | 0.54 | 0.0014   | 2.85345 | 0.63945651 | 0.811985788 | -0.173 |
| cg01495332 | II | 37 | 7  | 50798564  | GRB10;GRB10;GRB10 | 0.54 | 0.0014   | 2.85345 | 0.6618562  | 0.488844965 | 0.173  |
| cg04952324 | II | 37 | 7  | 73727108  | CLIP2;CLIP2       | 0.58 | 0.00041  | 3.39184 | 0.46399512 | 0.637100301 | -0.173 |
| cg05862438 | II | 37 | 7  | 142920096 | TAS2R40           | 0.5  | 0.00432  | 2.36443 | 0.26707436 | 0.440066787 | -0.173 |
| cg11969064 | II | 37 | 8  | 1845598   | ARHGFE10          | 0.54 | 0.0014   | 2.85345 | 0.48905106 | 0.662245258 | -0.173 |
| cg16225800 | II | 37 | 8  | 126591906 |                   | 0.46 | 0.01197  | 1.92207 | 0.56148854 | 0.388770755 | 0.173  |
| cg13713821 | II | 37 | 9  | 95899302  |                   | 0.5  | 0.00432  | 2.36443 | 0.70882845 | 0.5359552   | 0.173  |
| cg07161179 | II | 37 | 11 | 698201    | TMEM80;TMEM80     | 0.5  | 0.00432  | 2.36443 | 0.42387559 | 0.596619737 | -0.173 |
| cg12907644 | II | 37 | 11 | 18270341  | SAA2;SAA2         | 0.62 | 0.0001   | 3.98291 | 0.56663076 | 0.739536854 | -0.173 |
| cg02647874 | II | 37 | 11 | 47380751  | SPI1;SPI1         | 0.5  | 0.00432  | 2.36443 | 0.5424712  | 0.71531507  | -0.173 |
| cg11054816 | II | 37 | 11 | 117183853 | BACE1;BACE1;BACE1 | 0.46 | 0.01197  | 1.92207 | 0.64315912 | 0.816449006 | -0.173 |
| cg16766036 | I  | 37 | 13 | 114800309 | RASA3             | 0.54 | 0.0014   | 2.85345 | 0.75122373 | 0.924088031 | -0.173 |
| cg01811815 | II | 37 | 13 | 114881103 | RASA3             | 0.5  | 0.00432  | 2.36443 | 0.4073875  | 0.580634861 | -0.173 |
| cg21507807 | II | 37 | 13 | 114888458 | RASA3             | 0.54 | 0.0014   | 2.85345 | 0.50865794 | 0.681553586 | -0.173 |
| cg08190125 | I  | 37 | 14 | 106145435 |                   | 0.5  | 0.00432  | 2.36443 | 0.77119527 | 0.597713159 | 0.173  |
| cg21898299 | II | 37 | 15 | 68924220  | CORO2B            | 0.46 | 0.01197  | 1.92207 | 0.46467723 | 0.291561284 | 0.173  |
| cg00709979 | I  | 37 | 16 | 85866348  |                   | 0.58 | 0.00041  | 3.39184 | 0.5577317  | 0.384551574 | 0.173  |
| cg02835823 | II | 37 | 16 | 85979060  |                   | 0.42 | 0.02991  | 1.52413 | 0.39660511 | 0.223538476 | 0.173  |

|            |    |    |    |                             |      |         |         |            |             |        |
|------------|----|----|----|-----------------------------|------|---------|---------|------------|-------------|--------|
| cg09816821 | I  | 37 | 16 | 88709302                    | 0.54 | 0.0014  | 2.85345 | 0.66132089 | 0.834775313 | -0.173 |
| cg02909097 | II | 37 | 17 | 2843206 RAP1GAP2;RAP1GA     | 0.58 | 0.00041 | 3.39184 | 0.62790505 | 0.801084062 | -0.173 |
| cg16530881 | II | 37 | 17 | 38708399                    | 0.46 | 0.01197 | 1.92207 | 0.55344518 | 0.3800898   | 0.173  |
| cg16643542 | I  | 37 | 19 | 827843 AZU1;AZU1            | 0.54 | 0.0014  | 2.85345 | 0.56447839 | 0.737202483 | -0.173 |
| cg02849894 | II | 37 | 19 | 2608971 GNG7                | 0.54 | 0.0014  | 2.85345 | 0.71934416 | 0.546308726 | 0.173  |
| cg13733403 | II | 37 | 19 | 6528291                     | 0.5  | 0.00432 | 2.36443 | 0.77061493 | 0.598050688 | 0.173  |
| cg17514528 | II | 37 | 1  | 11862907 MTHFR              | 0.5  | 0.00432 | 2.36443 | 0.37544106 | 0.547110767 | -0.172 |
| cg01823958 | II | 37 | 1  | 53557455 SLC1A7             | 0.54 | 0.0014  | 2.85345 | 0.46526629 | 0.637066465 | -0.172 |
| cg04360793 | I  | 37 | 1  | 79472361 ELTD1;ELTD1        | 0.5  | 0.00432 | 2.36443 | 0.29607204 | 0.468332161 | -0.172 |
| cg26303281 | II | 37 | 1  | 153515622 S100A5            | 0.62 | 0.0001  | 3.98291 | 0.53565464 | 0.707488413 | -0.172 |
| cg11379081 | I  | 37 | 1  | 209405050                   | 0.54 | 0.0014  | 2.85345 | 0.25593296 | 0.428316324 | -0.172 |
| cg16256243 | II | 37 | 2  | 85648512                    | 0.62 | 0.0001  | 3.98291 | 0.39486045 | 0.566683964 | -0.172 |
| cg03035167 | II | 37 | 2  | 201336269 SPATS2L;SPATS2L;S | 0.54 | 0.0014  | 2.85345 | 0.63800453 | 0.465748235 | 0.172  |
| cg01177100 | II | 37 | 3  | 9176211 SRGAP3;SRGAP3       | 0.54 | 0.0014  | 2.85345 | 0.51648688 | 0.687988006 | -0.172 |
| cg02352281 | I  | 37 | 3  | 46139305                    | 0.5  | 0.00432 | 2.36443 | 0.2846587  | 0.456841465 | -0.172 |
| cg22074114 | II | 37 | 3  | 134326341 KY                | 0.54 | 0.0014  | 2.85345 | 0.57042023 | 0.742079372 | -0.172 |
| cg11579059 | II | 37 | 4  | 156300245                   | 0.58 | 0.00041 | 3.39184 | 0.68305234 | 0.854889479 | -0.172 |
| cg13026137 | II | 37 | 6  | 31701260 CLIC1              | 0.46 | 0.01197 | 1.92207 | 0.45529937 | 0.626841571 | -0.172 |
| cg24833027 | II | 37 | 8  | 1897969 ARHGEF10            | 0.46 | 0.01197 | 1.92207 | 0.59743432 | 0.769296814 | -0.172 |
| cg09529783 | II | 37 | 8  | 1958930                     | 0.54 | 0.0014  | 2.85345 | 0.7254345  | 0.553121386 | 0.172  |
| cg11639815 | I  | 37 | 8  | 37379119                    | 0.54 | 0.0014  | 2.85345 | 0.72217436 | 0.894456346 | -0.172 |
| cg07054804 | II | 37 | 11 | 10621492 MRVI1;MRVI1;MRV    | 0.62 | 0.0001  | 3.98291 | 0.67359492 | 0.845194298 | -0.172 |
| cg01219426 | II | 37 | 11 | 95856658 MAML2              | 0.62 | 0.0001  | 3.98291 | 0.44815071 | 0.275752843 | 0.172  |
| cg10264003 | II | 37 | 11 | 110198965                   | 0.5  | 0.00432 | 2.36443 | 0.36831608 | 0.196716813 | 0.172  |
| cg13126638 | II | 37 | 12 | 6487080 SCNN1A              | 0.58 | 0.00041 | 3.39184 | 0.70473317 | 0.876640145 | -0.172 |
| cg14276580 | II | 37 | 13 | 40527020                    | 0.62 | 0.0001  | 3.98291 | 0.37070876 | 0.198899962 | 0.172  |
| cg05878073 | II | 37 | 14 | 74766220 ABCD4;ABCD4        | 0.46 | 0.01197 | 1.92207 | 0.53875413 | 0.710935617 | -0.172 |
| cg05313263 | II | 37 | 14 | 100906689 WDR25;WDR25       | 0.5  | 0.00432 | 2.36443 | 0.16642271 | 0.338712127 | -0.172 |
| cg04614155 | II | 37 | 15 | 42209202 EHD4               | 0.54 | 0.0014  | 2.85345 | 0.30348305 | 0.475970818 | -0.172 |
| cg01426968 | II | 37 | 16 | 15596369 C16orf45;C16orf45  | 0.62 | 0.0001  | 3.98291 | 0.63528105 | 0.807198328 | -0.172 |
| cg13629783 | II | 37 | 17 | 5689617                     | 0.62 | 0.0001  | 3.98291 | 0.65037834 | 0.478493956 | 0.172  |
| cg13195185 | II | 37 | 17 | 16875596 TNFRSF13B          | 0.5  | 0.00432 | 2.36443 | 0.50401966 | 0.332225994 | 0.172  |
| cg25183263 | II | 37 | 17 | 25949090 KSR1               | 0.5  | 0.00432 | 2.36443 | 0.61373191 | 0.441721619 | 0.172  |

|            |    |    |    |           |                      |      |          |         |            |             |        |
|------------|----|----|----|-----------|----------------------|------|----------|---------|------------|-------------|--------|
| cg01636591 | II | 37 | 17 | 32646156  | CCL8;CCL8            | 0.54 | 0.0014   | 2.85345 | 0.60053892 | 0.772464287 | -0.172 |
| cg03469804 | II | 37 | 17 | 72732432  | RAB37;RAB37;RAB37    | 0.5  | 0.00432  | 2.36443 | 0.34804656 | 0.520209514 | -0.172 |
| cg08097359 | II | 37 | 19 | 50064054  | NOSIP                | 0.54 | 0.0014   | 2.85345 | 0.32662536 | 0.498486345 | -0.172 |
| cg13650654 | II | 37 | 19 | 55435064  | NLRP7;NLRP7;NLRP7    | 0.67 | 2.34E-05 | 4.63072 | 0.60231834 | 0.774297642 | -0.172 |
| cg24334029 | II | 37 | 20 | 58296208  | PHACTR3;PHACTR3      | 0.62 | 0.0001   | 3.98291 | 0.64259212 | 0.814383812 | -0.172 |
| cg10486610 | I  | 37 | 20 | 61298677  | LOC100127888;SLC     | 0.58 | 0.00041  | 3.39184 | 0.61245394 | 0.784554572 | -0.172 |
| cg02315187 | II | 37 | 21 | 46317913  | ITGB2;ITGB2          | 0.67 | 2.34E-05 | 4.63072 | 0.44035348 | 0.612265925 | -0.172 |
| cg04011995 | II | 37 | 1  | 41326317  |                      | 0.5  | 0.00432  | 2.36443 | 0.71071534 | 0.881413578 | -0.171 |
| cg25739016 | II | 37 | 1  | 167638918 | RCSD1                | 0.46 | 0.01197  | 1.92207 | 0.63147515 | 0.460328655 | 0.171  |
| cg20944315 | II | 37 | 1  | 200839460 |                      | 0.46 | 0.01197  | 1.92207 | 0.67931051 | 0.508531357 | 0.171  |
| cg18535415 | II | 37 | 1  | 200983238 | KIF21B               | 0.5  | 0.00432  | 2.36443 | 0.59608931 | 0.767259529 | -0.171 |
| cg07434244 | II | 37 | 1  | 209847729 | GOS2                 | 0.58 | 0.00041  | 3.39184 | 0.3844029  | 0.555244674 | -0.171 |
| cg00809399 | II | 37 | 1  | 249153756 | ZNF692;ZNF692        | 0.54 | 0.0014   | 2.85345 | 0.37432465 | 0.544905372 | -0.171 |
| cg15914335 | II | 37 | 2  | 1746253   | PXDN                 | 0.5  | 0.00432  | 2.36443 | 0.76127261 | 0.590231196 | 0.171  |
| cg10329928 | II | 37 | 2  | 20414196  | SDC1;SDC1            | 0.42 | 0.02991  | 1.52413 | 0.47991859 | 0.309229998 | 0.171  |
| cg02458141 | II | 37 | 2  | 20817916  | HS1BP3               | 0.46 | 0.01197  | 1.92207 | 0.31623307 | 0.487595768 | -0.171 |
| cg01994190 | II | 37 | 2  | 119768574 |                      | 0.58 | 0.00041  | 3.39184 | 0.26940697 | 0.440634232 | -0.171 |
| cg24172324 | II | 37 | 2  | 232258363 |                      | 0.54 | 0.0014   | 2.85345 | 0.32495409 | 0.153466951 | 0.171  |
| cg10179004 | I  | 37 | 3  | 48601902  | COL7A1;UCN2          | 0.62 | 0.0001   | 3.98291 | 0.528529   | 0.699973447 | -0.171 |
| cg24121168 | II | 37 | 3  | 58652503  | FAM3D;FAM3D          | 0.75 | 7.61E-07 | 6.11857 | 0.49405141 | 0.665342598 | -0.171 |
| cg23250593 | II | 37 | 3  | 196065688 | TM4SF19              | 0.5  | 0.00432  | 2.36443 | 0.5284513  | 0.699659851 | -0.171 |
| cg09875213 | II | 37 | 5  | 134786596 | TIFAB                | 0.54 | 0.0014   | 2.85345 | 0.69993767 | 0.528480358 | 0.171  |
| cg10287970 | II | 37 | 6  | 7115345   | RREB1;RREB1;RREB1    | 0.5  | 0.00432  | 2.36443 | 0.41932804 | 0.590788267 | -0.171 |
| cg10975897 | I  | 37 | 6  | 15504844  | JARID2               | 0.5  | 0.00432  | 2.36443 | 0.65068065 | 0.821268875 | -0.171 |
| cg20052079 | I  | 37 | 6  | 15504923  | JARID2               | 0.46 | 0.01197  | 1.92207 | 0.68184665 | 0.852630596 | -0.171 |
| cg03739609 | II | 37 | 6  | 31555016  | LST1;LST1;LST1;LST1  | 0.54 | 0.0014   | 2.85345 | 0.37524687 | 0.545992286 | -0.171 |
| cg21588594 | II | 37 | 6  | 32917979  | HLA-DMA              | 0.54 | 0.0014   | 2.85345 | 0.41094745 | 0.239818937 | 0.171  |
| cg03078690 | II | 37 | 6  | 33235504  | VPS52                | 0.71 | 4.57E-06 | 5.34042 | 0.59321788 | 0.764564585 | -0.171 |
| cg06702850 | II | 37 | 6  | 166876890 | RPS6KA2;RPS6KA2      | 0.54 | 0.0014   | 2.85345 | 0.19921325 | 0.370637722 | -0.171 |
| cg26139131 | II | 37 | 7  | 72420870  | NSUN5C;NSUN5C;NSUN5C | 0.54 | 0.0014   | 2.85345 | 0.58479179 | 0.755396483 | -0.171 |
| cg04996195 | I  | 37 | 7  | 87105398  | ABCB4;ABCB4;ABCB4    | 0.5  | 0.00432  | 2.36443 | 0.44666873 | 0.275949673 | 0.171  |
| cg17479131 | II | 37 | 7  | 149567078 | LOC401431            | 0.67 | 2.34E-05 | 4.63072 | 0.67637584 | 0.505655531 | 0.171  |
| cg02048922 | I  | 37 | 8  | 143546858 | BAI1                 | 0.42 | 0.02991  | 1.52413 | 0.5464265  | 0.375441372 | 0.171  |

|            |    |    |    |           |                    |      |          |         |            |             |        |
|------------|----|----|----|-----------|--------------------|------|----------|---------|------------|-------------|--------|
| cg19215266 | II | 37 | 10 | 35417163  | CREM;CREM;CREM     | 0.42 | 0.02991  | 1.52413 | 0.68598458 | 0.514763434 | 0.171  |
| cg04084348 | II | 37 | 10 | 75677011  | PLAU;C10orf55;PLA  | 0.5  | 0.00432  | 2.36443 | 0.29694553 | 0.467472529 | -0.171 |
| cg25306480 | I  | 37 | 10 | 134226517 | PWWP2B;PWWP2E      | 0.58 | 0.00041  | 3.39184 | 0.48245167 | 0.653627929 | -0.171 |
| cg20566897 | II | 37 | 11 | 313527    | IFITM1             | 0.54 | 0.0014   | 2.85345 | 0.43112637 | 0.259633646 | 0.171  |
| cg25976340 | II | 37 | 11 | 18611549  | UEVLD;UEVLD        | 0.5  | 0.00432  | 2.36443 | 0.52588078 | 0.696548334 | -0.171 |
| cg15939287 | II | 37 | 11 | 64406051  | NRXN2;NRXN2;NRX    | 0.5  | 0.00432  | 2.36443 | 0.66014791 | 0.489163382 | 0.171  |
| cg09383860 | II | 37 | 11 | 71709837  | IL18BP;IL18BP;IL18 | 0.42 | 0.02991  | 1.52413 | 0.24768459 | 0.418957904 | -0.171 |
| cg14596967 | II | 37 | 11 | 113956944 | ZBTB16;ZBTB16      | 0.54 | 0.0014   | 2.85345 | 0.58593364 | 0.756554313 | -0.171 |
| cg19998289 | II | 37 | 12 | 121861616 | RNF34;RNF34        | 0.71 | 4.57E-06 | 5.34042 | 0.68294668 | 0.853699253 | -0.171 |
| cg10082165 | I  | 37 | 14 | 25043758  | CTSG               | 0.58 | 0.00041  | 3.39184 | 0.64157624 | 0.813053769 | -0.171 |
| cg06341731 | II | 37 | 14 | 99641017  | BCL11B;BCL11B      | 0.46 | 0.01197  | 1.92207 | 0.72772744 | 0.898375286 | -0.171 |
| cg02032125 | II | 37 | 14 | 101000186 |                    | 0.58 | 0.00041  | 3.39184 | 0.57012882 | 0.740798021 | -0.171 |
| cg15022400 | II | 37 | 15 | 45028161  | TRIM69;TRIM69      | 0.42 | 0.02991  | 1.52413 | 0.24475558 | 0.415669985 | -0.171 |
| cg19348484 | II | 37 | 15 | 91413236  | FURIN              | 0.54 | 0.0014   | 2.85345 | 0.31977621 | 0.490797093 | -0.171 |
| cg02023973 | II | 37 | 16 | 1519973   | CLCN7;CLCN7        | 0.54 | 0.0014   | 2.85345 | 0.45658344 | 0.627236105 | -0.171 |
| cg04856396 | I  | 37 | 17 | 3589140   | P2RX5;P2RX5        | 0.58 | 0.00041  | 3.39184 | 0.28429815 | 0.112799544 | 0.171  |
| cg21554670 | II | 37 | 17 | 9967417   | GAS7               | 0.5  | 0.00432  | 2.36443 | 0.45227407 | 0.622840823 | -0.171 |
| cg11690666 | II | 37 | 17 | 80415469  | NARF;NARF;NARF;N   | 0.5  | 0.00432  | 2.36443 | 0.7344021  | 0.905544884 | -0.171 |
| cg06432200 | I  | 37 | 18 | 77238375  | NFATC1;NFATC1;NF   | 0.58 | 0.00041  | 3.39184 | 0.62329624 | 0.452434142 | 0.171  |
| cg22035959 | I  | 37 | 19 | 951681    | ARID3A             | 0.46 | 0.01197  | 1.92207 | 0.73206139 | 0.561180257 | 0.171  |
| cg12138514 | II | 37 | 19 | 14625610  | DNAJB1             | 0.5  | 0.00432  | 2.36443 | 0.67935555 | 0.508606749 | 0.171  |
| cg12530021 | II | 37 | 19 | 52004630  | SIGLEC12;SIGLEC12  | 0.58 | 0.00041  | 3.39184 | 0.39260628 | 0.563595576 | -0.171 |
| cg12594933 | II | 37 | 1  | 3806817   | C1orf174           | 0.46 | 0.01197  | 1.92207 | 0.40691071 | 0.577266107 | -0.17  |
| cg00502254 | II | 37 | 1  | 12201600  | TNFRSF8;TNFRSF8    | 0.58 | 0.00041  | 3.39184 | 0.6752076  | 0.844947728 | -0.17  |
| cg17901584 | II | 37 | 1  | 55353706  | DHCR24             | 0.5  | 0.00432  | 2.36443 | 0.56999    | 0.74001157  | -0.17  |
| cg02566391 | II | 37 | 1  | 67805528  | IL12RB2            | 0.62 | 0.0001   | 3.98291 | 0.60840259 | 0.437970569 | 0.17   |
| cg07234097 | II | 37 | 1  | 184761873 | FAM129A            | 0.5  | 0.00432  | 2.36443 | 0.25158595 | 0.421679636 | -0.17  |
| cg14422093 | II | 37 | 1  | 227009245 |                    | 0.54 | 0.0014   | 2.85345 | 0.65876557 | 0.489252343 | 0.17   |
| cg08858998 | II | 37 | 1  | 229123641 |                    | 0.54 | 0.0014   | 2.85345 | 0.57371536 | 0.744009715 | -0.17  |
| cg26750893 | II | 37 | 2  | 38043481  |                    | 0.46 | 0.01197  | 1.92207 | 0.68553114 | 0.855230225 | -0.17  |
| cg24532083 | II | 37 | 3  | 44100380  |                    | 0.58 | 0.00041  | 3.39184 | 0.41130602 | 0.241670168 | 0.17   |
| cg26763394 | II | 37 | 3  | 45957664  |                    | 0.54 | 0.0014   | 2.85345 | 0.68788448 | 0.517403354 | 0.17   |
| cg22065514 | II | 37 | 3  | 48602040  | COL7A1;UCN2        | 0.58 | 0.00041  | 3.39184 | 0.51249069 | 0.682770443 | -0.17  |

|            |    |    |    |                            |      |          |         |            |             |        |
|------------|----|----|----|----------------------------|------|----------|---------|------------|-------------|--------|
| cg26300517 | II | 37 | 4  | 38732661                   | 0.67 | 2.34E-05 | 4.63072 | 0.59873961 | 0.42920154  | 0.17   |
| cg14137381 | I  | 37 | 5  | 502291 SLC9A3              | 0.54 | 0.0014   | 2.85345 | 0.36378932 | 0.193320883 | 0.17   |
| cg01408486 | II | 37 | 5  | 139027024 CXXC5            | 0.5  | 0.00432  | 2.36443 | 0.21591124 | 0.386200504 | -0.17  |
| cg02343823 | I  | 37 | 5  | 150284419 ZNF300           | 0.5  | 0.00432  | 2.36443 | 0.34640466 | 0.51640288  | -0.17  |
| cg08743794 | II | 37 | 6  | 30656577 KIAA1949;NRM;KIA  | 0.46 | 0.01197  | 1.92207 | 0.47641923 | 0.306303375 | 0.17   |
| cg06632549 | II | 37 | 6  | 31529993                   | 0.58 | 0.00041  | 3.39184 | 0.62310446 | 0.453114006 | 0.17   |
| cg13775306 | II | 37 | 6  | 33577711                   | 0.42 | 0.02991  | 1.52413 | 0.45845971 | 0.288708506 | 0.17   |
| cg26918117 | II | 37 | 7  | 101603298 CUX1;CUX1;CUX1   | 0.54 | 0.0014   | 2.85345 | 0.72634969 | 0.896834098 | -0.17  |
| cg14774440 | II | 37 | 8  | 37730745 RAB11FIP1;RAB11F  | 0.5  | 0.00432  | 2.36443 | 0.41851813 | 0.588039986 | -0.17  |
| cg20611272 | II | 37 | 8  | 103548145                  | 0.62 | 0.0001   | 3.98291 | 0.59325931 | 0.423367404 | 0.17   |
| cg24752563 | I  | 37 | 11 | 2410796 CD81               | 0.71 | 4.57E-06 | 5.34042 | 0.43995454 | 0.269969557 | 0.17   |
| cg21746120 | II | 37 | 11 | 68142234 LRP5              | 0.46 | 0.01197  | 1.92207 | 0.41228779 | 0.581927349 | -0.17  |
| cg03139377 | II | 37 | 12 | 323242 SLC6A12;SLC6A12;S   | 0.5  | 0.00432  | 2.36443 | 0.39705044 | 0.567494546 | -0.17  |
| cg26269286 | II | 37 | 14 | 103848982                  | 0.62 | 0.0001   | 3.98291 | 0.25946329 | 0.42944523  | -0.17  |
| cg09744966 | II | 37 | 15 | 31668476 KLF13             | 0.54 | 0.0014   | 2.85345 | 0.81736928 | 0.647207645 | 0.17   |
| cg05799962 | II | 37 | 16 | 31404385 ITGAD             | 0.58 | 0.00041  | 3.39184 | 0.37233655 | 0.202822735 | 0.17   |
| cg05083852 | I  | 37 | 16 | 81480610 CMIP              | 0.42 | 0.02991  | 1.52413 | 0.40854885 | 0.578825883 | -0.17  |
| cg21949830 | I  | 37 | 17 | 1510041 SLC43A2            | 0.5  | 0.00432  | 2.36443 | 0.77571168 | 0.606022696 | 0.17   |
| cg05744184 | II | 37 | 17 | 40463806 STAT5A            | 0.62 | 0.0001   | 3.98291 | 0.34642204 | 0.516169377 | -0.17  |
| cg11872040 | I  | 37 | 17 | 80819028 TBCD              | 0.5  | 0.00432  | 2.36443 | 0.79143221 | 0.621093952 | 0.17   |
| cg22313519 | II | 37 | 19 | 18385724 KIAA1683;KIAA1683 | 0.46 | 0.01197  | 1.92207 | 0.33371837 | 0.503818591 | -0.17  |
| cg12033822 | II | 37 | 20 | 44990591 SLC35C2;SLC35C2;S | 0.54 | 0.0014   | 2.85345 | 0.44616896 | 0.616365344 | -0.17  |
| cg20519581 | II | 37 | 20 | 48959844                   | 0.58 | 0.00041  | 3.39184 | 0.47412542 | 0.643757575 | -0.17  |
| cg19344545 | II | 37 | 21 | 45575573                   | 0.62 | 0.0001   | 3.98291 | 0.63873401 | 0.468440658 | 0.17   |
| cg10058766 | I  | 37 | 1  | 12186079 TNFRSF8;TNFRSF8;T | 0.62 | 0.0001   | 3.98291 | 0.37451737 | 0.543079739 | -0.169 |
| cg23728867 | II | 37 | 1  | 12304452 VPS13D;VPS13D     | 0.54 | 0.0014   | 2.85345 | 0.56988058 | 0.739133054 | -0.169 |
| cg06774445 | II | 37 | 1  | 36793290                   | 0.58 | 0.00041  | 3.39184 | 0.62594769 | 0.794853378 | -0.169 |
| cg13567986 | I  | 37 | 1  | 38310056 MTF1              | 0.54 | 0.0014   | 2.85345 | 0.72225311 | 0.890781227 | -0.169 |
| cg09025625 | II | 37 | 1  | 154942509 SHC1;SHC1;SHC1;S | 0.46 | 0.01197  | 1.92207 | 0.34703313 | 0.516298735 | -0.169 |
| cg18882687 | II | 37 | 1  | 228275828 ARF1;ARF1;ARF1;A | 0.58 | 0.00041  | 3.39184 | 0.24840702 | 0.416994551 | -0.169 |
| cg25101396 | II | 37 | 2  | 27346296 ABHD1             | 0.5  | 0.00432  | 2.36443 | 0.31932774 | 0.488376365 | -0.169 |
| cg12454169 | II | 37 | 2  | 30669597 LCLAT1;LCLAT1     | 0.46 | 0.01197  | 1.92207 | 0.29648029 | 0.465219207 | -0.169 |
| cg05933789 | II | 37 | 2  | 97190408                   | 0.62 | 0.0001   | 3.98291 | 0.83590838 | 0.667213843 | 0.169  |

|            |    |    |    |                            |      |          |         |            |             |        |
|------------|----|----|----|----------------------------|------|----------|---------|------------|-------------|--------|
| cg09004241 | II | 37 | 2  | 232259431 B3GNT7           | 0.58 | 0.00041  | 3.39184 | 0.49342828 | 0.324080149 | 0.169  |
| cg04438064 | II | 37 | 2  | 240161619 HDAC4            | 0.54 | 0.0014   | 2.85345 | 0.53406154 | 0.703434991 | -0.169 |
| cg26233331 | II | 37 | 4  | 6695614 S100P;S100P        | 0.5  | 0.00432  | 2.36443 | 0.42605902 | 0.59470034  | -0.169 |
| cg10925991 | II | 37 | 4  | 40324096                   | 0.62 | 0.0001   | 3.98291 | 0.20517313 | 0.374215994 | -0.169 |
| cg22051146 | II | 37 | 5  | 177895047 COL23A1          | 0.46 | 0.01197  | 1.92207 | 0.26040614 | 0.429567987 | -0.169 |
| cg24111025 | II | 37 | 6  | 32819921 TAP1              | 0.58 | 0.00041  | 3.39184 | 0.87169509 | 0.702939993 | 0.169  |
| cg10950593 | II | 37 | 7  | 6212775 CYTH3              | 0.58 | 0.00041  | 3.39184 | 0.64801286 | 0.817283836 | -0.169 |
| cg18325315 | II | 37 | 7  | 73897230 GTF2IRD1;GTF2IRD  | 0.5  | 0.00432  | 2.36443 | 0.66886874 | 0.838107789 | -0.169 |
| cg13471712 | II | 37 | 11 | 45952237 PHF21A;PHF21A     | 0.5  | 0.00432  | 2.36443 | 0.4992067  | 0.329942283 | 0.169  |
| cg01550445 | II | 37 | 11 | 72929983 P2RY2;P2RY2;P2RY  | 0.58 | 0.00041  | 3.39184 | 0.62418147 | 0.793217949 | -0.169 |
| cg05754179 | II | 37 | 11 | 125985044                  | 0.46 | 0.01197  | 1.92207 | 0.59472811 | 0.425899284 | 0.169  |
| cg23807570 | II | 37 | 12 | 110787107 ATP2A2;ATP2A2;AT | 0.58 | 0.00041  | 3.39184 | 0.60091542 | 0.769804409 | -0.169 |
| cg10024730 | II | 37 | 12 | 123402350                  | 0.58 | 0.00041  | 3.39184 | 0.64454964 | 0.814005602 | -0.169 |
| cg15278374 | I  | 37 | 12 | 131576088 GPR133           | 0.54 | 0.0014   | 2.85345 | 0.8174442  | 0.648587837 | 0.169  |
| cg14643399 | II | 37 | 13 | 44706965                   | 0.46 | 0.01197  | 1.92207 | 0.42288628 | 0.591779674 | -0.169 |
| cg19635644 | II | 37 | 13 | 100007277 UBAC2;MIR623;UB  | 0.5  | 0.00432  | 2.36443 | 0.81031301 | 0.641350136 | 0.169  |
| cg24327132 | II | 37 | 15 | 72520632 PKM2;PKM2;PKM2    | 0.5  | 0.00432  | 2.36443 | 0.29385054 | 0.124529595 | 0.169  |
| cg02102075 | II | 37 | 16 | 474430 RAB11FIP3           | 0.58 | 0.00041  | 3.39184 | 0.58403726 | 0.753420227 | -0.169 |
| cg02223351 | II | 37 | 16 | 66402367 CDH5              | 0.58 | 0.00041  | 3.39184 | 0.31578554 | 0.484537246 | -0.169 |
| cg02549595 | II | 37 | 16 | 85947219 IRF8              | 0.62 | 0.0001   | 3.98291 | 0.53447612 | 0.702981806 | -0.169 |
| cg04708264 | II | 37 | 16 | 87323420                   | 0.58 | 0.00041  | 3.39184 | 0.68353656 | 0.852245722 | -0.169 |
| cg19776793 | I  | 37 | 17 | 79225974 SLC38A10;SLC38A1  | 0.54 | 0.0014   | 2.85345 | 0.75288515 | 0.583497451 | 0.169  |
| cg02224021 | II | 37 | 19 | 836716                     | 0.58 | 0.00041  | 3.39184 | 0.32721752 | 0.496220106 | -0.169 |
| cg19867991 | II | 37 | 19 | 13051573 CALR              | 0.58 | 0.00041  | 3.39184 | 0.45758302 | 0.626280844 | -0.169 |
| cg18109874 | II | 37 | 19 | 14115611 RFX1              | 0.67 | 2.34E-05 | 4.63072 | 0.45416415 | 0.622664771 | -0.169 |
| cg02812809 | I  | 37 | 19 | 39361447 RINL              | 0.62 | 0.0001   | 3.98291 | 0.72307854 | 0.892571726 | -0.169 |
| cg07747220 | I  | 37 | 20 | 3052115 OXT                | 0.5  | 0.00432  | 2.36443 | 0.63974439 | 0.808564012 | -0.169 |
| cg00009196 | II | 37 | 20 | 19954588 RIN2              | 0.58 | 0.00041  | 3.39184 | 0.23617363 | 0.405386911 | -0.169 |
| cg00125455 | II | 37 | 20 | 44574271 PCIF1             | 0.62 | 0.0001   | 3.98291 | 0.62822418 | 0.797617558 | -0.169 |
| cg18731680 | II | 37 | 22 | 19953712 COMT;COMT;COMT    | 0.58 | 0.00041  | 3.39184 | 0.43087437 | 0.600301708 | -0.169 |
| cg23098018 | I  | 37 | 1  | 9775755 PIK3CD             | 0.42 | 0.02991  | 1.52413 | 0.89255448 | 0.724057401 | 0.168  |
| cg21471199 | II | 37 | 1  | 19218212 ALDH4A1;ALDH4A1   | 0.54 | 0.0014   | 2.85345 | 0.67434844 | 0.842586688 | -0.168 |
| cg05202204 | II | 37 | 1  | 38460950                   | 0.54 | 0.0014   | 2.85345 | 0.42869659 | 0.596485768 | -0.168 |

|            |    |    |    |           |                  |      |          |         |            |             |        |
|------------|----|----|----|-----------|------------------|------|----------|---------|------------|-------------|--------|
| cg00177203 | II | 37 | 1  | 149901142 | MTMR11;MTMR11    | 0.58 | 0.00041  | 3.39184 | 0.73037104 | 0.898812726 | -0.168 |
| cg06764092 | I  | 37 | 1  | 159796658 | SLAMF8;SLAMF8    | 0.5  | 0.00432  | 2.36443 | 0.47112972 | 0.63919834  | -0.168 |
| cg02334333 | II | 37 | 2  | 60687392  | BCL11A;BCL11A;BC | 0.54 | 0.0014   | 2.85345 | 0.44106519 | 0.609034711 | -0.168 |
| cg26253134 | II | 37 | 2  | 70751721  | TGFA;TGFA        | 0.54 | 0.0014   | 2.85345 | 0.33219924 | 0.500674834 | -0.168 |
| cg08202287 | II | 37 | 2  | 232259281 | B3GNT7           | 0.46 | 0.01197  | 1.92207 | 0.4422367  | 0.274474225 | 0.168  |
| cg15871206 | I  | 37 | 2  | 239009118 | ESPNL            | 0.62 | 0.0001   | 3.98291 | 0.67019239 | 0.838608809 | -0.168 |
| cg13419330 | II | 37 | 3  | 10247487  | IRAK2            | 0.62 | 0.0001   | 3.98291 | 0.66930535 | 0.837148902 | -0.168 |
| cg00505318 | II | 37 | 3  | 69130918  | UBA3;UBA3        | 0.54 | 0.0014   | 2.85345 | 0.50139894 | 0.333045769 | 0.168  |
| cg21593835 | II | 37 | 3  | 123354036 | MYLK;MYLK;MYLK;I | 0.58 | 0.00041  | 3.39184 | 0.48013159 | 0.648177946 | -0.168 |
| cg21964798 | I  | 37 | 5  | 1503259   | LPCAT1           | 0.46 | 0.01197  | 1.92207 | 0.88473334 | 0.71651783  | 0.168  |
| cg05187549 | II | 37 | 5  | 138904075 |                  | 0.46 | 0.01197  | 1.92207 | 0.65992089 | 0.492042612 | 0.168  |
| cg17038235 | II | 37 | 5  | 172370524 | ERGIC1           | 0.5  | 0.00432  | 2.36443 | 0.63667962 | 0.804360932 | -0.168 |
| cg20477259 | II | 37 | 6  | 31544960  | TNF              | 0.54 | 0.0014   | 2.85345 | 0.59809683 | 0.43048165  | 0.168  |
| cg08784966 | II | 37 | 6  | 37248768  | TBC1D22B         | 0.62 | 0.0001   | 3.98291 | 0.65443062 | 0.822000794 | -0.168 |
| cg04074908 | II | 37 | 6  | 44101190  | TMEM63B          | 0.5  | 0.00432  | 2.36443 | 0.60093997 | 0.432679525 | 0.168  |
| cg16640008 | I  | 37 | 6  | 159515404 |                  | 0.54 | 0.0014   | 2.85345 | 0.76323394 | 0.595074142 | 0.168  |
| cg05076730 | II | 37 | 8  | 129060815 | MIR1207;PVT1     | 0.5  | 0.00432  | 2.36443 | 0.32361538 | 0.491803507 | -0.168 |
| cg14283140 | II | 37 | 9  | 135763667 | C9orf9           | 0.46 | 0.01197  | 1.92207 | 0.4812227  | 0.313481652 | 0.168  |
| cg01709312 | II | 37 | 10 | 112630835 | LOC282997;PDCD4  | 0.42 | 0.02991  | 1.52413 | 0.6346489  | 0.466615411 | 0.168  |
| cg21130221 | II | 37 | 11 | 2848310   | KCNQ1;KCNQ1      | 0.67 | 2.34E-05 | 4.63072 | 0.39696349 | 0.565376297 | -0.168 |
| cg16389345 | II | 37 | 11 | 46697382  |                  | 0.54 | 0.0014   | 2.85345 | 0.6371993  | 0.804790583 | -0.168 |
| cg21599336 | II | 37 | 11 | 133910341 | LOC100128239     | 0.46 | 0.01197  | 1.92207 | 0.41814101 | 0.586399974 | -0.168 |
| cg00159243 | I  | 37 | 12 | 109023799 | SELPLG           | 0.42 | 0.02991  | 1.52413 | 0.56853405 | 0.736815924 | -0.168 |
| cg05294112 | II | 37 | 13 | 112617069 |                  | 0.46 | 0.01197  | 1.92207 | 0.39991009 | 0.568173764 | -0.168 |
| cg08162124 | I  | 37 | 13 | 113428094 | ATP11A;ATP11A    | 0.5  | 0.00432  | 2.36443 | 0.85486476 | 0.687158494 | 0.168  |
| cg12798040 | I  | 37 | 14 | 104171840 | XRCC3;XRCC3;XRCC | 0.58 | 0.00041  | 3.39184 | 0.74228976 | 0.910568359 | -0.168 |
| cg14372792 | II | 37 | 15 | 93188381  | FAM174B          | 0.5  | 0.00432  | 2.36443 | 0.32507861 | 0.493395295 | -0.168 |
| cg17792616 | II | 37 | 15 | 93580327  |                  | 0.5  | 0.00432  | 2.36443 | 0.65652417 | 0.824704094 | -0.168 |
| cg00599219 | I  | 37 | 16 | 3307037   | MEFV             | 0.54 | 0.0014   | 2.85345 | 0.55537526 | 0.723527046 | -0.168 |
| cg07967665 | II | 37 | 16 | 27542328  | GTF3C1           | 0.54 | 0.0014   | 2.85345 | 0.53170339 | 0.699651204 | -0.168 |
| cg01298987 | II | 37 | 16 | 30005856  | HIRIP3           | 0.58 | 0.00041  | 3.39184 | 0.42840907 | 0.596115906 | -0.168 |
| cg05246530 | II | 37 | 16 | 70441937  | ST3GAL2          | 0.5  | 0.00432  | 2.36443 | 0.72982125 | 0.56223955  | 0.168  |
| cg01900006 | I  | 37 | 16 | 88814613  | FAM38A           | 0.5  | 0.00432  | 2.36443 | 0.6486734  | 0.480640894 | 0.168  |

|            |    |    |    |                            |      |          |         |            |             |        |
|------------|----|----|----|----------------------------|------|----------|---------|------------|-------------|--------|
| cg25673591 | II | 37 | 17 | 39945814                   | 0.58 | 0.00041  | 3.39184 | 0.52927003 | 0.697217082 | -0.168 |
| cg14275281 | II | 37 | 17 | 43189622 PLCD3             | 0.46 | 0.01197  | 1.92207 | 0.48980415 | 0.321377474 | 0.168  |
| cg13480197 | II | 37 | 17 | 79799358                   | 0.62 | 0.0001   | 3.98291 | 0.54719448 | 0.71548448  | -0.168 |
| cg09907228 | II | 37 | 19 | 838964                     | 0.58 | 0.00041  | 3.39184 | 0.66492119 | 0.83332953  | -0.168 |
| cg09134726 | II | 37 | 19 | 841082 PRTN3               | 0.67 | 2.34E-05 | 4.63072 | 0.44964832 | 0.61767638  | -0.168 |
| cg17680611 | II | 37 | 19 | 16191217 TPM4;TPM4         | 0.5  | 0.00432  | 2.36443 | 0.76066551 | 0.592858124 | 0.168  |
| cg26623753 | II | 37 | 19 | 39224370 CAPN12            | 0.46 | 0.01197  | 1.92207 | 0.38992967 | 0.558143294 | -0.168 |
| cg11182965 | II | 37 | 22 | 19864308 TXNRD2            | 0.46 | 0.01197  | 1.92207 | 0.48657521 | 0.318711815 | 0.168  |
| cg08465307 | I  | 37 | 1  | 3827081 LOC100133612       | 0.5  | 0.00432  | 2.36443 | 0.78932194 | 0.622273451 | 0.167  |
| cg10210690 | II | 37 | 1  | 55138059 C1orf175;C1orf175 | 0.46 | 0.01197  | 1.92207 | 0.64329498 | 0.476692657 | 0.167  |
| cg06207961 | II | 37 | 1  | 108661230                  | 0.62 | 0.0001   | 3.98291 | 0.21112325 | 0.378142983 | -0.167 |
| cg21422623 | II | 37 | 1  | 226912213 ITPKB            | 0.5  | 0.00432  | 2.36443 | 0.71837916 | 0.551514875 | 0.167  |
| cg13043454 | II | 37 | 2  | 48980605 LHCGR             | 0.46 | 0.01197  | 1.92207 | 0.69221515 | 0.525216487 | 0.167  |
| cg08003402 | II | 37 | 3  | 15311021 SH3BP5;SH3BP5     | 0.54 | 0.0014   | 2.85345 | 0.3522896  | 0.519434069 | -0.167 |
| cg20133901 | II | 37 | 3  | 51602121 RAD54L2           | 0.58 | 0.00041  | 3.39184 | 0.230017   | 0.396561347 | -0.167 |
| cg01290904 | II | 37 | 4  | 5708474 EVC2;EVC2          | 0.62 | 0.0001   | 3.98291 | 0.56512136 | 0.731903785 | -0.167 |
| cg10136560 | II | 37 | 4  | 140737518 MAML3            | 0.75 | 7.61E-07 | 6.11857 | 0.54575478 | 0.713254507 | -0.167 |
| cg08400424 | II | 37 | 5  | 142357042 ARHGAP26;ARHGAI  | 0.46 | 0.01197  | 1.92207 | 0.38051424 | 0.547981234 | -0.167 |
| cg17328407 | II | 37 | 5  | 157288521                  | 0.54 | 0.0014   | 2.85345 | 0.75952757 | 0.592144579 | 0.167  |
| cg07446753 | II | 37 | 7  | 2527391                    | 0.46 | 0.01197  | 1.92207 | 0.59352242 | 0.426907468 | 0.167  |
| cg21607965 | II | 37 | 7  | 2648289 IQCE;IQCE          | 0.58 | 0.00041  | 3.39184 | 0.25949431 | 0.426628245 | -0.167 |
| cg23304647 | II | 37 | 7  | 2778058 GNA12              | 0.5  | 0.00432  | 2.36443 | 0.23003721 | 0.396727686 | -0.167 |
| cg19809988 | II | 37 | 7  | 149569883 ATP6V0E2;ATP6V0E | 0.58 | 0.00041  | 3.39184 | 0.33695039 | 0.504432253 | -0.167 |
| cg11937033 | I  | 37 | 7  | 155150681                  | 0.42 | 0.02991  | 1.52413 | 0.64346438 | 0.810703577 | -0.167 |
| cg08224773 | II | 37 | 8  | 11311868 FAM167A           | 0.5  | 0.00432  | 2.36443 | 0.60065319 | 0.434054313 | 0.167  |
| cg02046475 | II | 37 | 8  | 28047708 ELP3              | 0.46 | 0.01197  | 1.92207 | 0.41526574 | 0.248483199 | 0.167  |
| cg08243626 | II | 37 | 10 | 6442501                    | 0.5  | 0.00432  | 2.36443 | 0.20412496 | 0.371400404 | -0.167 |
| cg24951886 | II | 37 | 10 | 13526236 BEND7;BEND7       | 0.54 | 0.0014   | 2.85345 | 0.69696003 | 0.529627881 | 0.167  |
| cg26378073 | II | 37 | 10 | 105213818 CALHM1           | 0.5  | 0.00432  | 2.36443 | 0.25889523 | 0.425791399 | -0.167 |
| cg20833786 | II | 37 | 11 | 18141393 MRGPRX3           | 0.54 | 0.0014   | 2.85345 | 0.4786086  | 0.645461011 | -0.167 |
| cg23090046 | II | 37 | 14 | 104094619 KLC1;KLC1;KLC1   | 0.54 | 0.0014   | 2.85345 | 0.39712222 | 0.564186504 | -0.167 |
| cg27545630 | II | 37 | 16 | 2013058 SNORA64;SNORA1C    | 0.5  | 0.00432  | 2.36443 | 0.73911054 | 0.572416337 | 0.167  |
| cg27050111 | II | 37 | 16 | 8738240 C16orf68           | 0.54 | 0.0014   | 2.85345 | 0.32497004 | 0.49148614  | -0.167 |

|            |    |    |    |           |                   |      |          |         |            |             |        |
|------------|----|----|----|-----------|-------------------|------|----------|---------|------------|-------------|--------|
| cg27087781 | II | 37 | 16 | 30108404  | YPEL3;YPEL3       | 0.5  | 0.00432  | 2.36443 | 0.34266536 | 0.510021595 | -0.167 |
| cg16460860 | II | 37 | 17 | 17744282  |                   | 0.67 | 2.34E-05 | 4.63072 | 0.53111735 | 0.698611964 | -0.167 |
| cg17980404 | II | 37 | 17 | 38601676  | IGFBP4            | 0.54 | 0.0014   | 2.85345 | 0.35242898 | 0.519824972 | -0.167 |
| cg20772590 | II | 37 | 17 | 75446431  | SEPT9;SEPT9;SEPT9 | 0.54 | 0.0014   | 2.85345 | 0.55289825 | 0.385619301 | 0.167  |
| cg16638092 | I  | 37 | 17 | 78800774  | RPTOR;RPTOR       | 0.42 | 0.02991  | 1.52413 | 0.31358666 | 0.480784795 | -0.167 |
| cg11609556 | I  | 37 | 17 | 79006044  | FLJ90757          | 0.58 | 0.00041  | 3.39184 | 0.60674826 | 0.773545524 | -0.167 |
| cg01558916 | II | 37 | 19 | 11804727  |                   | 0.5  | 0.00432  | 2.36443 | 0.59947032 | 0.766777242 | -0.167 |
| cg04624110 | I  | 37 | 20 | 13976093  | MACROD2           | 0.79 | 1.06E-07 | 6.97389 | 0.1054464  | 0.272703697 | -0.167 |
| cg04087207 | II | 37 | 20 | 31669392  | C20orf186         | 0.46 | 0.01197  | 1.92207 | 0.43486511 | 0.602148921 | -0.167 |
| cg02455383 | II | 37 | 22 | 27014116  | CRYBB1            | 0.62 | 0.0001   | 3.98291 | 0.30760081 | 0.474381038 | -0.167 |
| cg14830045 | I  | 37 | 1  | 1173264   |                   | 0.42 | 0.02991  | 1.52413 | 0.56082069 | 0.395077599 | 0.166  |
| cg00560747 | II | 37 | 1  | 31279227  |                   | 0.54 | 0.0014   | 2.85345 | 0.44869588 | 0.282978176 | 0.166  |
| cg09825327 | II | 37 | 1  | 211503219 | TRAF5;TRAF5       | 0.67 | 2.34E-05 | 4.63072 | 0.63820764 | 0.472196538 | 0.166  |
| cg01054402 | II | 37 | 2  | 85551850  | TGOLN2            | 0.46 | 0.01197  | 1.92207 | 0.49683844 | 0.662791809 | -0.166 |
| cg23546106 | II | 37 | 2  | 216764063 |                   | 0.5  | 0.00432  | 2.36443 | 0.54088427 | 0.70717783  | -0.166 |
| cg12425057 | II | 37 | 3  | 15107106  | MRPS25            | 0.5  | 0.00432  | 2.36443 | 0.35295777 | 0.518606857 | -0.166 |
| cg14788242 | II | 37 | 3  | 127773954 | SEC61A1           | 0.46 | 0.01197  | 1.92207 | 0.57165762 | 0.737505873 | -0.166 |
| cg05445326 | II | 37 | 3  | 196065569 | TM4SF19           | 0.46 | 0.01197  | 1.92207 | 0.66080976 | 0.826587543 | -0.166 |
| cg13995774 | II | 37 | 5  | 179189810 | MAML1             | 0.42 | 0.02991  | 1.52413 | 0.63476119 | 0.800549748 | -0.166 |
| cg14741870 | II | 37 | 6  | 30174091  | TRIM26            | 0.5  | 0.00432  | 2.36443 | 0.70947743 | 0.543174156 | 0.166  |
| cg13747899 | II | 37 | 6  | 33171911  | HSD17B8;SLC39A7;  | 0.54 | 0.0014   | 2.85345 | 0.42548426 | 0.591555422 | -0.166 |
| cg09130674 | II | 37 | 6  | 39195019  | KCNK5             | 0.58 | 0.00041  | 3.39184 | 0.3036196  | 0.470068162 | -0.166 |
| cg18905161 | II | 37 | 6  | 84742998  | MRAP2             | 0.5  | 0.00432  | 2.36443 | 0.52991525 | 0.363682263 | 0.166  |
| cg22340370 | II | 37 | 7  | 2019882   | MAD1L1;MAD1L1;†   | 0.5  | 0.00432  | 2.36443 | 0.52620374 | 0.36028919  | 0.166  |
| cg22679120 | II | 37 | 7  | 2353402   | SNX8              | 0.5  | 0.00432  | 2.36443 | 0.48601764 | 0.320445989 | 0.166  |
| cg25075684 | II | 37 | 7  | 2933297   |                   | 0.46 | 0.01197  | 1.92207 | 0.28660026 | 0.120578381 | 0.166  |
| cg15825027 | II | 37 | 8  | 586336    |                   | 0.46 | 0.01197  | 1.92207 | 0.71167993 | 0.877490852 | -0.166 |
| cg08170427 | II | 37 | 8  | 144410815 | TOP1MT            | 0.54 | 0.0014   | 2.85345 | 0.37085371 | 0.537002518 | -0.166 |
| cg13979562 | II | 37 | 9  | 138967844 | NACC2             | 0.5  | 0.00432  | 2.36443 | 0.19550896 | 0.361679858 | -0.166 |
| cg04453371 | II | 37 | 10 | 30496461  |                   | 0.46 | 0.01197  | 1.92207 | 0.61024853 | 0.443855974 | 0.166  |
| cg06266973 | II | 37 | 10 | 43811183  |                   | 0.67 | 2.34E-05 | 4.63072 | 0.47679532 | 0.642719542 | -0.166 |
| cg24517899 | II | 37 | 10 | 126290093 | LHPP;LHPP         | 0.46 | 0.01197  | 1.92207 | 0.50997107 | 0.344276202 | 0.166  |
| cg08623810 | II | 37 | 11 | 64427416  | NRXN2;NRXN2       | 0.5  | 0.00432  | 2.36443 | 0.58022759 | 0.746328125 | -0.166 |

|            |    |    |    |                           |      |          |         |            |             |        |
|------------|----|----|----|---------------------------|------|----------|---------|------------|-------------|--------|
| cg18832738 | II | 37 | 12 | 95210053                  | 0.67 | 2.34E-05 | 4.63072 | 0.67738639 | 0.511176592 | 0.166  |
| cg25772418 | II | 37 | 12 | 131519998 GPR133          | 0.42 | 0.02991  | 1.52413 | 0.71917621 | 0.553114668 | 0.166  |
| cg27026786 | I  | 37 | 13 | 24798133 SPATA13;SPATA13  | 0.67 | 2.34E-05 | 4.63072 | 0.61314348 | 0.447200355 | 0.166  |
| cg16505704 | II | 37 | 13 | 80378331                  | 0.54 | 0.0014   | 2.85345 | 0.60982621 | 0.775958369 | -0.166 |
| cg24730612 | II | 37 | 14 | 75649973                  | 0.58 | 0.00041  | 3.39184 | 0.70893441 | 0.874499459 | -0.166 |
| cg20981219 | II | 37 | 14 | 77385200                  | 0.58 | 0.00041  | 3.39184 | 0.65219163 | 0.818174137 | -0.166 |
| cg11667061 | II | 37 | 14 | 101909021                 | 0.67 | 2.34E-05 | 4.63072 | 0.42264222 | 0.256251376 | 0.166  |
| cg05603784 | I  | 37 | 16 | 88499083 ZNF469           | 0.5  | 0.00432  | 2.36443 | 0.69332805 | 0.85907324  | -0.166 |
| cg16802439 | I  | 37 | 16 | 88907184 GALNS            | 0.5  | 0.00432  | 2.36443 | 0.75474624 | 0.920844765 | -0.166 |
| cg27615938 | II | 37 | 17 | 16344574 NCRNA00188;NCRN  | 0.58 | 0.00041  | 3.39184 | 0.45955082 | 0.625477758 | -0.166 |
| cg12188928 | II | 37 | 17 | 27309139 SEZ6;SEZ6        | 0.58 | 0.00041  | 3.39184 | 0.62616745 | 0.792652791 | -0.166 |
| cg06966839 | II | 37 | 17 | 55685941 MSI2;MSI2        | 0.5  | 0.00432  | 2.36443 | 0.62175975 | 0.788202446 | -0.166 |
| cg13545633 | II | 37 | 17 | 75524350                  | 0.46 | 0.01197  | 1.92207 | 0.64560577 | 0.479385297 | 0.166  |
| cg05377587 | I  | 37 | 17 | 80845231 TBCD             | 0.58 | 0.00041  | 3.39184 | 0.73077564 | 0.564313689 | 0.166  |
| cg19746982 | II | 37 | 18 | 77552568                  | 0.46 | 0.01197  | 1.92207 | 0.45883613 | 0.625069389 | -0.166 |
| cg26580869 | I  | 37 | 19 | 611506 HCN2               | 0.58 | 0.00041  | 3.39184 | 0.61462891 | 0.449069724 | 0.166  |
| cg09479818 | II | 37 | 19 | 33880790 PEPD;PEPD;PEPD   | 0.54 | 0.0014   | 2.85345 | 0.67576623 | 0.841415833 | -0.166 |
| cg22801149 | II | 37 | 19 | 50472470 SIGLEC16         | 0.54 | 0.0014   | 2.85345 | 0.59736958 | 0.763139138 | -0.166 |
| cg11453079 | II | 37 | 20 | 43058872 HNF4A;HNF4A      | 0.54 | 0.0014   | 2.85345 | 0.64595898 | 0.47958693  | 0.166  |
| cg01565160 | II | 37 | 20 | 61512901 DIDO1            | 0.67 | 2.34E-05 | 4.63072 | 0.67160511 | 0.837897422 | -0.166 |
| cg17050807 | I  | 37 | 22 | 42548356                  | 0.71 | 4.57E-06 | 5.34042 | 0.74443955 | 0.910053163 | -0.166 |
| cg21428954 | I  | 37 | 22 | 46760505 CELSR1           | 0.46 | 0.01197  | 1.92207 | 0.82657468 | 0.660152138 | 0.166  |
| cg05656688 | I  | 37 | 1  | 25254088 RUNX3;RUNX3      | 0.62 | 0.0001   | 3.98291 | 0.70630145 | 0.541792966 | 0.165  |
| cg16395432 | I  | 37 | 1  | 26880807 MIR1976;RPS6KA1; | 0.46 | 0.01197  | 1.92207 | 0.65420201 | 0.818907789 | -0.165 |
| cg24332710 | II | 37 | 1  | 46016173 AKR1A1;AKR1A1    | 0.67 | 2.34E-05 | 4.63072 | 0.38858409 | 0.553584594 | -0.165 |
| cg09472600 | II | 37 | 1  | 183537770 NCF2;NCF2       | 0.46 | 0.01197  | 1.92207 | 0.24360933 | 0.408354359 | -0.165 |
| cg23633330 | II | 37 | 1  | 207510679 CD55;CD55       | 0.62 | 0.0001   | 3.98291 | 0.29144055 | 0.126194451 | 0.165  |
| cg21473786 | II | 37 | 2  | 44311918                  | 0.62 | 0.0001   | 3.98291 | 0.65463522 | 0.819386878 | -0.165 |
| cg04579254 | II | 37 | 2  | 231090745 SP140;SP140     | 0.5  | 0.00432  | 2.36443 | 0.78226291 | 0.617669745 | 0.165  |
| cg21199854 | II | 37 | 3  | 52724044 GNL3;GNL3;GNL3;S | 0.42 | 0.02991  | 1.52413 | 0.47556349 | 0.640116578 | -0.165 |
| cg04571130 | II | 37 | 3  | 128967393 COPG            | 0.54 | 0.0014   | 2.85345 | 0.5286806  | 0.693703975 | -0.165 |
| cg03840289 | II | 37 | 4  | 2262318 MXD4              | 0.54 | 0.0014   | 2.85345 | 0.50417501 | 0.669500279 | -0.165 |
| cg05612654 | I  | 37 | 6  | 2375895                   | 0.42 | 0.02991  | 1.52413 | 0.6914211  | 0.856767655 | -0.165 |

|            |    |    |    |           |                   |      |          |         |            |             |        |
|------------|----|----|----|-----------|-------------------|------|----------|---------|------------|-------------|--------|
| cg12586150 | II | 37 | 6  | 2840792   | SERPINB1          | 0.62 | 0.0001   | 3.98291 | 0.29235841 | 0.456939244 | -0.165 |
| cg26969933 | II | 37 | 6  | 31629900  | C6orf47;BAT4      | 0.42 | 0.02991  | 1.52413 | 0.50062884 | 0.665743691 | -0.165 |
| cg02571055 | I  | 37 | 6  | 158896790 | TULP4;TULP4       | 0.62 | 0.0001   | 3.98291 | 0.76384874 | 0.598707301 | 0.165  |
| cg04593460 | II | 37 | 7  | 2045488   | MAD1L1;MAD1L1;M   | 0.46 | 0.01197  | 1.92207 | 0.65773547 | 0.493200433 | 0.165  |
| cg06889086 | II | 37 | 7  | 55638230  | VOPP1             | 0.54 | 0.0014   | 2.85345 | 0.76670711 | 0.601943432 | 0.165  |
| cg11774624 | I  | 37 | 8  | 41480639  | AGPAT6            | 0.42 | 0.02991  | 1.52413 | 0.7630736  | 0.598350309 | 0.165  |
| cg15442737 | I  | 37 | 8  | 141370229 | TRAPPC9;TRAPPC9   | 0.46 | 0.01197  | 1.92207 | 0.28055578 | 0.445693373 | -0.165 |
| cg13408655 | II | 37 | 9  | 101820844 | COL15A1           | 0.5  | 0.00432  | 2.36443 | 0.40991019 | 0.574677384 | -0.165 |
| cg13430755 | II | 37 | 9  | 110310795 |                   | 0.54 | 0.0014   | 2.85345 | 0.41476966 | 0.579836008 | -0.165 |
| cg27479162 | II | 37 | 10 | 98450737  | PIK3AP1           | 0.58 | 0.00041  | 3.39184 | 0.4061705  | 0.570727749 | -0.165 |
| cg13424029 | I  | 37 | 10 | 101297508 |                   | 0.71 | 4.57E-06 | 5.34042 | 0.37901787 | 0.544205968 | -0.165 |
| cg24680439 | II | 37 | 10 | 134778467 |                   | 0.42 | 0.02991  | 1.52413 | 0.4650955  | 0.630052794 | -0.165 |
| cg19668951 | II | 37 | 11 | 47430812  | SLC39A13;SLC39A1  | 0.5  | 0.00432  | 2.36443 | 0.39273337 | 0.557304752 | -0.165 |
| cg12070987 | I  | 37 | 11 | 67804055  | NDUFS8            | 0.58 | 0.00041  | 3.39184 | 0.55294488 | 0.718399859 | -0.165 |
| cg05154234 | II | 37 | 12 | 48204680  | HDAC7;HDAC7       | 0.62 | 0.0001   | 3.98291 | 0.60790148 | 0.443156486 | 0.165  |
| cg11881599 | II | 37 | 12 | 92814084  | CLLU1OS;CLLU1;CLI | 0.46 | 0.01197  | 1.92207 | 0.57557625 | 0.410122191 | 0.165  |
| cg01878807 | II | 37 | 14 | 24422368  | DHRS4;C14orf167;C | 0.54 | 0.0014   | 2.85345 | 0.41390401 | 0.578779494 | -0.165 |
| cg07004075 | II | 37 | 14 | 24649335  | REC8;REC8         | 0.5  | 0.00432  | 2.36443 | 0.57104411 | 0.405772387 | 0.165  |
| cg13067714 | II | 37 | 14 | 69091453  |                   | 0.67 | 2.34E-05 | 4.63072 | 0.54252741 | 0.707873789 | -0.165 |
| cg27563121 | II | 37 | 15 | 52405647  | BCL2L10           | 0.62 | 0.0001   | 3.98291 | 0.67743369 | 0.842209413 | -0.165 |
| cg16103421 | II | 37 | 15 | 102068632 |                   | 0.54 | 0.0014   | 2.85345 | 0.45887969 | 0.624162816 | -0.165 |
| cg27193519 | II | 37 | 16 | 4714443   | MGRN1;MGRN1;M     | 0.5  | 0.00432  | 2.36443 | 0.35505213 | 0.520352184 | -0.165 |
| cg05035061 | II | 37 | 16 | 85028831  | ZDHHC7;ZDHHC7     | 0.58 | 0.00041  | 3.39184 | 0.65726262 | 0.821905133 | -0.165 |
| cg04782146 | II | 37 | 16 | 85112370  | KIAA0513          | 0.58 | 0.00041  | 3.39184 | 0.63337369 | 0.797991846 | -0.165 |
| cg00463732 | II | 37 | 17 | 3704621   | ITGAE             | 0.54 | 0.0014   | 2.85345 | 0.57543525 | 0.740796665 | -0.165 |
| cg27372422 | II | 37 | 19 | 41086247  | SHKBP1            | 0.46 | 0.01197  | 1.92207 | 0.32825447 | 0.492789199 | -0.165 |
| cg13226290 | II | 37 | 20 | 1448595   | NSFL1C;NSFL1C;NSI | 0.5  | 0.00432  | 2.36443 | 0.35970679 | 0.525198649 | -0.165 |
| cg22100563 | I  | 37 | 20 | 62505188  | TPD52L2;TPD52L2;  | 0.54 | 0.00175  | 2.75713 | 0.79018582 | 0.955658837 | -0.165 |
| cg05523906 | II | 37 | 1  | 17751761  | RCC2;RCC2         | 0.62 | 0.0001   | 3.98291 | 0.5599962  | 0.724467783 | -0.164 |
| cg00970057 | II | 37 | 1  | 42272694  | HIVEP3;HIVEP3     | 0.5  | 0.00432  | 2.36443 | 0.59651142 | 0.432226465 | 0.164  |
| cg20309640 | II | 37 | 1  | 178027432 |                   | 0.62 | 0.0001   | 3.98291 | 0.40304159 | 0.239315322 | 0.164  |
| cg00942920 | II | 37 | 1  | 203734559 | LAX1;LAX1;LAX1    | 0.62 | 0.0001   | 3.98291 | 0.61135979 | 0.447573946 | 0.164  |
| cg17517296 | II | 37 | 2  | 43107458  |                   | 0.58 | 0.00041  | 3.39184 | 0.30288439 | 0.466465316 | -0.164 |

|            |    |    |    |                            |      |          |         |            |             |        |
|------------|----|----|----|----------------------------|------|----------|---------|------------|-------------|--------|
| cg26207766 | II | 37 | 2  | 242763794                  | 0.5  | 0.00432  | 2.36443 | 0.52283118 | 0.686996914 | -0.164 |
| cg24462247 | II | 37 | 4  | 1770837                    | 0.42 | 0.02991  | 1.52413 | 0.57510921 | 0.411029489 | 0.164  |
| cg26076905 | II | 37 | 5  | 67522298 PIK3R1            | 0.46 | 0.01197  | 1.92207 | 0.66776406 | 0.8315535   | -0.164 |
| cg22685009 | II | 37 | 5  | 71597700 MRPS27            | 0.42 | 0.02991  | 1.52413 | 0.72618468 | 0.562440851 | 0.164  |
| cg16176675 | II | 37 | 5  | 134786942 TIFAB            | 0.5  | 0.00432  | 2.36443 | 0.60942673 | 0.773460752 | -0.164 |
| cg17485265 | II | 37 | 6  | 3848790 FAM50B             | 0.62 | 0.0001   | 3.98291 | 0.70546741 | 0.869295434 | -0.164 |
| cg10145196 | II | 37 | 6  | 30647649 KIAA1949;KIAA1949 | 0.62 | 0.0001   | 3.98291 | 0.66964575 | 0.505901791 | 0.164  |
| cg17039645 | II | 37 | 6  | 32294503 C6orf10           | 0.58 | 0.00041  | 3.39184 | 0.61575628 | 0.779492705 | -0.164 |
| cg04904815 | I  | 37 | 6  | 41010654 TSPO2;TSPO2       | 0.54 | 0.0014   | 2.85345 | 0.55383719 | 0.71802196  | -0.164 |
| cg01281718 | II | 37 | 6  | 71376634 SMAP1;SMAP1       | 0.67 | 2.34E-05 | 4.63072 | 0.73680234 | 0.901065449 | -0.164 |
| cg22059211 | I  | 37 | 8  | 735312                     | 0.54 | 0.0014   | 2.85345 | 0.79836401 | 0.634028679 | 0.164  |
| cg22835851 | II | 37 | 10 | 49892302 WDFY4             | 0.67 | 2.34E-05 | 4.63072 | 0.67724055 | 0.513722596 | 0.164  |
| cg10689689 | II | 37 | 11 | 63677197 MARK2;MARK2;MA    | 0.54 | 0.0014   | 2.85345 | 0.63491239 | 0.798646666 | -0.164 |
| cg26761618 | II | 37 | 11 | 72928926 P2RY2;P2RY2;P2RY2 | 0.58 | 0.00041  | 3.39184 | 0.55583363 | 0.719438884 | -0.164 |
| cg10287137 | I  | 37 | 11 | 72929054 P2RY2;P2RY2;P2RY2 | 0.58 | 0.00041  | 3.39184 | 0.51175421 | 0.675679016 | -0.164 |
| cg07240557 | II | 37 | 12 | 27396937 STK38L            | 0.42 | 0.02991  | 1.52413 | 0.3069323  | 0.470890534 | -0.164 |
| cg08445469 | II | 37 | 12 | 53970794 ATF7;ATF7;ATF7    | 0.58 | 0.00041  | 3.39184 | 0.52912155 | 0.693531826 | -0.164 |
| cg23975840 | II | 37 | 12 | 117042895                  | 0.58 | 0.00041  | 3.39184 | 0.70402985 | 0.867964259 | -0.164 |
| cg12701674 | I  | 37 | 13 | 114908876                  | 0.71 | 4.57E-06 | 5.34042 | 0.59081485 | 0.426614395 | 0.164  |
| cg22242148 | I  | 37 | 15 | 74215283                   | 0.5  | 0.00432  | 2.36443 | 0.40977511 | 0.57399218  | -0.164 |
| cg12644285 | II | 37 | 15 | 93570953 CHD2              | 0.58 | 0.00041  | 3.39184 | 0.6591323  | 0.823024087 | -0.164 |
| cg06458258 | II | 37 | 16 | 1440604                    | 0.58 | 0.00041  | 3.39184 | 0.75850241 | 0.59490027  | 0.164  |
| cg05058976 | I  | 37 | 16 | 3637956 BTBD12             | 0.67 | 2.34E-05 | 4.63072 | 0.71695874 | 0.552821412 | 0.164  |
| cg04231085 | I  | 37 | 16 | 85561302                   | 0.54 | 0.0014   | 2.85345 | 0.72395312 | 0.887654171 | -0.164 |
| cg02834449 | II | 37 | 16 | 85786110 C16orf74          | 0.42 | 0.02991  | 1.52413 | 0.47701304 | 0.312570258 | 0.164  |
| cg16603012 | I  | 37 | 16 | 88879593 APRT;APRT         | 0.54 | 0.0014   | 2.85345 | 0.75265009 | 0.916885231 | -0.164 |
| cg05953373 | II | 37 | 16 | 89023633 CBFA2T3           | 0.67 | 2.34E-05 | 4.63072 | 0.60955816 | 0.773778521 | -0.164 |
| cg11204139 | I  | 37 | 17 | 3907470                    | 0.67 | 2.34E-05 | 4.63072 | 0.62844422 | 0.792652959 | -0.164 |
| cg18346531 | II | 37 | 17 | 9967431 GAS7               | 0.54 | 0.0014   | 2.85345 | 0.4660369  | 0.629624998 | -0.164 |
| cg18152830 | II | 37 | 17 | 16875129 TNFRSF13B         | 0.46 | 0.01197  | 1.92207 | 0.63889347 | 0.474987217 | 0.164  |
| cg19439043 | II | 37 | 17 | 37719913                   | 0.46 | 0.01197  | 1.92207 | 0.34739244 | 0.511263204 | -0.164 |
| cg06752482 | II | 37 | 17 | 58499816 C17orf64          | 0.54 | 0.0014   | 2.85345 | 0.44796949 | 0.611863955 | -0.164 |
| cg11297046 | II | 37 | 19 | 49657000 HRC               | 0.58 | 0.00041  | 3.39184 | 0.51901159 | 0.682924213 | -0.164 |

|            |    |    |    |                            |      |          |         |            |             |        |
|------------|----|----|----|----------------------------|------|----------|---------|------------|-------------|--------|
| cg13285174 | I  | 37 | 20 | 3052221 OXT                | 0.58 | 0.00041  | 3.39184 | 0.60212514 | 0.766381743 | -0.164 |
| cg03082779 | II | 37 | 20 | 45947025 ZMYND8;LOC10013   | 0.58 | 0.00041  | 3.39184 | 0.38858296 | 0.553077378 | -0.164 |
| cg03364381 | II | 37 | 21 | 43099460 NCRNA00111        | 0.42 | 0.02991  | 1.52413 | 0.42927385 | 0.593040887 | -0.164 |
| cg09160123 | II | 37 | 1  | 41981735 HIVEP3;HIVEP3     | 0.5  | 0.00432  | 2.36443 | 0.44412404 | 0.607568132 | -0.163 |
| cg17479280 | I  | 37 | 1  | 156466088 MEF2D            | 0.54 | 0.0014   | 2.85345 | 0.44060302 | 0.277516362 | 0.163  |
| cg09122593 | II | 37 | 1  | 203020141 PPFIA4           | 0.5  | 0.00432  | 2.36443 | 0.3697115  | 0.532742846 | -0.163 |
| cg18113803 | II | 37 | 1  | 220977858 MOSC1            | 0.54 | 0.0014   | 2.85345 | 0.8125022  | 0.649941509 | 0.163  |
| cg12057242 | II | 37 | 2  | 9603687 CPSF3              | 0.46 | 0.01197  | 1.92207 | 0.60942987 | 0.772882939 | -0.163 |
| cg16170614 | II | 37 | 4  | 24802387 SOD3              | 0.67 | 2.34E-05 | 4.63072 | 0.28110332 | 0.444558317 | -0.163 |
| cg26235369 | II | 37 | 5  | 173286145                  | 0.5  | 0.00432  | 2.36443 | 0.35418155 | 0.517433597 | -0.163 |
| cg17840719 | I  | 37 | 5  | 178368253 ZNF454;ZNF454    | 0.54 | 0.0014   | 2.85345 | 0.2522644  | 0.415659624 | -0.163 |
| cg18505752 | II | 37 | 6  | 32808752 PSMB8;PSMB8       | 0.67 | 2.34E-05 | 4.63072 | 0.56333687 | 0.400698341 | 0.163  |
| cg13446584 | II | 37 | 7  | 74024953                   | 0.5  | 0.00432  | 2.36443 | 0.66280839 | 0.826106871 | -0.163 |
| cg02913553 | II | 37 | 8  | 1951383 KBTBD11            | 0.54 | 0.0014   | 2.85345 | 0.53810698 | 0.700973743 | -0.163 |
| cg22234712 | I  | 37 | 8  | 96085385                   | 0.54 | 0.0014   | 2.85345 | 0.29681147 | 0.133616669 | 0.163  |
| cg22644321 | II | 37 | 8  | 126446923 TRIB1            | 0.46 | 0.01197  | 1.92207 | 0.24559137 | 0.408739096 | -0.163 |
| cg07971089 | II | 37 | 8  | 144629702                  | 0.5  | 0.00432  | 2.36443 | 0.21660977 | 0.379338716 | -0.163 |
| cg07629149 | I  | 37 | 10 | 334731 DIP2C               | 0.54 | 0.0014   | 2.85345 | 0.82254768 | 0.659733307 | 0.163  |
| cg24199006 | II | 37 | 10 | 106089203 ITPRIP           | 0.42 | 0.02991  | 1.52413 | 0.30195177 | 0.465307878 | -0.163 |
| cg07298473 | I  | 37 | 11 | 47279183 NR1H3;NR1H3;NR1   | 0.58 | 0.00041  | 3.39184 | 0.32742354 | 0.490038068 | -0.163 |
| cg09010791 | II | 37 | 11 | 72448539 ARAP1             | 0.62 | 0.0001   | 3.98291 | 0.69058412 | 0.854033604 | -0.163 |
| cg18838431 | I  | 37 | 11 | 74178800 KCNE3             | 0.58 | 0.00041  | 3.39184 | 0.30814625 | 0.470712267 | -0.163 |
| cg23474890 | I  | 37 | 12 | 122467179 BCL7A;BCL7A      | 0.54 | 0.0014   | 2.85345 | 0.79678454 | 0.634266325 | 0.163  |
| cg09294084 | I  | 37 | 13 | 113646732 MCF2L;MCF2L      | 0.58 | 0.00041  | 3.39184 | 0.49408246 | 0.657261374 | -0.163 |
| cg16502747 | II | 37 | 14 | 23531625 ACIN1;ACIN1;ACIN1 | 0.46 | 0.01197  | 1.92207 | 0.67450909 | 0.837823247 | -0.163 |
| cg23689615 | II | 37 | 15 | 74228839 LOXL1             | 0.58 | 0.00041  | 3.39184 | 0.64001348 | 0.802519905 | -0.163 |
| cg16455376 | II | 37 | 16 | 8985720                    | 0.58 | 0.00041  | 3.39184 | 0.63643999 | 0.473239224 | 0.163  |
| cg05849013 | II | 37 | 16 | 12411139 SNX29             | 0.42 | 0.02991  | 1.52413 | 0.76860735 | 0.605145314 | 0.163  |
| cg27583010 | I  | 37 | 16 | 30198505 CORO1A;LOC60672   | 0.46 | 0.01197  | 1.92207 | 0.71338268 | 0.550759396 | 0.163  |
| cg09019347 | II | 37 | 17 | 3493618 TRPV1;TRPV1;TRPV   | 0.42 | 0.02991  | 1.52413 | 0.59154248 | 0.428478154 | 0.163  |
| cg21097733 | II | 37 | 17 | 46623729 HOXB2             | 0.67 | 2.34E-05 | 4.63072 | 0.60101031 | 0.764102651 | -0.163 |
| cg23939642 | II | 37 | 17 | 79225757 SLC38A10;SLC38A1  | 0.42 | 0.02991  | 1.52413 | 0.70215613 | 0.539319528 | 0.163  |
| cg06663615 | II | 37 | 17 | 79423959 BAHCC1            | 0.46 | 0.01197  | 1.92207 | 0.45042649 | 0.613849356 | -0.163 |

|            |    |    |    |                           |      |          |         |            |             |        |
|------------|----|----|----|---------------------------|------|----------|---------|------------|-------------|--------|
| cg21786191 | II | 37 | 18 | 72916012 ZADH2            | 0.58 | 0.00041  | 3.39184 | 0.43912645 | 0.602259104 | -0.163 |
| cg10655021 | I  | 37 | 19 | 21769430                  | 0.62 | 0.0001   | 3.98291 | 0.06721019 | 0.230028363 | -0.163 |
| cg00748432 | II | 37 | 22 | 18042722 SLC25A18         | 0.5  | 0.00432  | 2.36443 | 0.46246016 | 0.62573206  | -0.163 |
| cg00791190 | I  | 37 | 22 | 50223573                  | 0.42 | 0.02991  | 1.52413 | 0.79047308 | 0.62749663  | 0.163  |
| cg24578937 | II | 37 | 1  | 2090814 PRKCZ;PRKCZ;PRKC  | 0.46 | 0.01197  | 1.92207 | 0.38408058 | 0.546252549 | -0.162 |
| cg26028440 | II | 37 | 1  | 27982716                  | 0.54 | 0.0014   | 2.85345 | 0.40888763 | 0.571262526 | -0.162 |
| cg09007354 | II | 37 | 1  | 54100163 GLIS1            | 0.5  | 0.00432  | 2.36443 | 0.56443284 | 0.72692798  | -0.162 |
| cg07029002 | II | 37 | 1  | 64358899 ROR1;ROR1        | 0.46 | 0.01197  | 1.92207 | 0.44179272 | 0.279306208 | 0.162  |
| cg00563824 | I  | 37 | 1  | 209405064                 | 0.46 | 0.01197  | 1.92207 | 0.21057838 | 0.372494172 | -0.162 |
| cg14789818 | I  | 37 | 1  | 227748712                 | 0.42 | 0.02991  | 1.52413 | 0.40734326 | 0.569118719 | -0.162 |
| cg08231648 | II | 37 | 1  | 235011814                 | 0.54 | 0.0014   | 2.85345 | 0.32513108 | 0.486837286 | -0.162 |
| cg18638581 | II | 37 | 2  | 75059602 HK2              | 0.54 | 0.0014   | 2.85345 | 0.33226764 | 0.494674578 | -0.162 |
| cg21340821 | II | 37 | 2  | 134855457                 | 0.62 | 0.0001   | 3.98291 | 0.69848532 | 0.86022274  | -0.162 |
| cg19145607 | II | 37 | 3  | 45983792 CXCR6;FYCO1      | 0.54 | 0.0014   | 2.85345 | 0.64162813 | 0.803457347 | -0.162 |
| cg06628679 | II | 37 | 4  | 10609880 CLNK             | 0.5  | 0.00432  | 2.36443 | 0.64073926 | 0.802821796 | -0.162 |
| cg07814567 | I  | 37 | 4  | 100736658 DAPP1           | 0.58 | 0.00041  | 3.39184 | 0.75123911 | 0.913346479 | -0.162 |
| cg08277306 | I  | 37 | 5  | 598817                    | 0.5  | 0.00432  | 2.36443 | 0.72229509 | 0.560642637 | 0.162  |
| cg14606478 | II | 37 | 6  | 30174190 TRIM26           | 0.5  | 0.00432  | 2.36443 | 0.68223718 | 0.519842692 | 0.162  |
| cg13336690 | II | 37 | 6  | 32976484 HLA-DOA          | 0.46 | 0.01197  | 1.92207 | 0.70537035 | 0.543400307 | 0.162  |
| cg09287933 | II | 37 | 6  | 33384473 CUTA;CUTA;CUTA;C | 0.58 | 0.00041  | 3.39184 | 0.79088001 | 0.629329108 | 0.162  |
| cg25444339 | II | 37 | 7  | 75194698 HIP1             | 0.54 | 0.0014   | 2.85345 | 0.43864768 | 0.600702319 | -0.162 |
| cg15549637 | II | 37 | 7  | 105489998 ATXN7L1;ATXN7L1 | 0.54 | 0.0014   | 2.85345 | 0.72143892 | 0.559304336 | 0.162  |
| cg20849109 | II | 37 | 8  | 1954777 KBTBD11           | 0.54 | 0.0014   | 2.85345 | 0.35461944 | 0.516590657 | -0.162 |
| cg23314364 | I  | 37 | 8  | 29230998                  | 0.46 | 0.01197  | 1.92207 | 0.27118566 | 0.432947729 | -0.162 |
| cg23731089 | I  | 37 | 8  | 141599208 EIF2C2;EIF2C2   | 0.5  | 0.00432  | 2.36443 | 0.82612821 | 0.66453008  | 0.162  |
| cg07168939 | II | 37 | 8  | 143763412 PSCA            | 0.62 | 0.0001   | 3.98291 | 0.44620202 | 0.608455239 | -0.162 |
| cg14459032 | II | 37 | 9  | 78905335                  | 0.5  | 0.00432  | 2.36443 | 0.56393242 | 0.726206804 | -0.162 |
| cg23758703 | II | 37 | 10 | 114610508 LOC143188       | 0.58 | 0.00041  | 3.39184 | 0.59358878 | 0.431165481 | 0.162  |
| cg13428066 | II | 37 | 11 | 2677768 KCNQ1;KCNQ1OT1;   | 0.58 | 0.00041  | 3.39184 | 0.26699602 | 0.428827208 | -0.162 |
| cg06708720 | II | 37 | 12 | 1099075 ERC1;ERC1;ERC1;EF | 0.67 | 2.34E-05 | 4.63072 | 0.46013981 | 0.622288845 | -0.162 |
| cg15920906 | II | 37 | 12 | 111619414 CUX2            | 0.54 | 0.0014   | 2.85345 | 0.43137159 | 0.59343289  | -0.162 |
| cg21830849 | II | 37 | 12 | 129283486 SLC15A4         | 0.46 | 0.01197  | 1.92207 | 0.85555502 | 0.693223824 | 0.162  |
| cg24018814 | II | 37 | 12 | 133348116 GOLGA3          | 0.46 | 0.01197  | 1.92207 | 0.38861873 | 0.22630547  | 0.162  |

|            |    |    |    |                            |      |          |         |            |             |        |
|------------|----|----|----|----------------------------|------|----------|---------|------------|-------------|--------|
| cg25939371 | II | 37 | 15 | 72598286 BRUNOL6           | 0.58 | 0.00041  | 3.39184 | 0.59900707 | 0.761148636 | -0.162 |
| cg00268476 | II | 37 | 16 | 2740589 KCTD5              | 0.62 | 0.0001   | 3.98291 | 0.36727974 | 0.529418327 | -0.162 |
| cg03890691 | I  | 37 | 16 | 30023615 DOC2A             | 0.5  | 0.00432  | 2.36443 | 0.52908568 | 0.367564091 | 0.162  |
| cg05573626 | II | 37 | 16 | 49672687 ZNF423            | 0.54 | 0.0014   | 2.85345 | 0.36187604 | 0.524044619 | -0.162 |
| cg08580187 | II | 37 | 16 | 84027871 NECAB2            | 0.5  | 0.00432  | 2.36443 | 0.27781101 | 0.44010903  | -0.162 |
| cg14467066 | II | 37 | 17 | 79419739 BAHCC1            | 0.46 | 0.01197  | 1.92207 | 0.62145333 | 0.458987887 | 0.162  |
| cg22092521 | II | 37 | 19 | 859330 CFD                 | 0.5  | 0.00432  | 2.36443 | 0.23677818 | 0.398972642 | -0.162 |
| cg21495704 | I  | 37 | 19 | 36399346 TYROBP;TYROBP     | 0.46 | 0.01197  | 1.92207 | 0.4352857  | 0.597755454 | -0.162 |
| cg08228249 | II | 37 | 22 | 22062300 YPEL1             | 0.5  | 0.00432  | 2.36443 | 0.78029701 | 0.618519583 | 0.162  |
| cg10097977 | II | 37 | 22 | 33670007 LARGE;LARGE       | 0.46 | 0.01197  | 1.92207 | 0.71881439 | 0.557254785 | 0.162  |
| cg14686297 | II | 37 | 22 | 46650375                   | 0.54 | 0.0014   | 2.85345 | 0.34631771 | 0.507827058 | -0.162 |
| cg15822328 | II | 37 | 1  | 1072197                    | 0.5  | 0.00432  | 2.36443 | 0.43188465 | 0.270809266 | 0.161  |
| cg00546248 | II | 37 | 1  | 2412743 PLCH2              | 0.42 | 0.02991  | 1.52413 | 0.59280449 | 0.432095904 | 0.161  |
| cg15015996 | I  | 37 | 1  | 3382565 ARHGEF16           | 0.54 | 0.0014   | 2.85345 | 0.53642281 | 0.374950285 | 0.161  |
| cg03403093 | II | 37 | 2  | 99132041 INPP4A;INPP4A;INF | 0.58 | 0.00041  | 3.39184 | 0.73650182 | 0.897273439 | -0.161 |
| cg24695950 | I  | 37 | 2  | 162364264                  | 0.46 | 0.01197  | 1.92207 | 0.44829241 | 0.287675082 | 0.161  |
| cg25941354 | II | 37 | 2  | 218989983 CXCR2;CXCR2      | 0.58 | 0.00041  | 3.39184 | 0.40021273 | 0.561564944 | -0.161 |
| cg01368900 | II | 37 | 3  | 13113959 IQSEC1            | 0.42 | 0.02991  | 1.52413 | 0.46982726 | 0.30920061  | 0.161  |
| cg07672051 | II | 37 | 5  | 149887787 NDST1;NDST1      | 0.58 | 0.00041  | 3.39184 | 0.59999095 | 0.761122492 | -0.161 |
| cg03857664 | II | 37 | 5  | 171864134 SH3PXD2B         | 0.58 | 0.00041  | 3.39184 | 0.84680131 | 0.685431885 | 0.161  |
| cg26813604 | II | 37 | 5  | 172256357                  | 0.58 | 0.00041  | 3.39184 | 0.73112112 | 0.570389261 | 0.161  |
| cg14989988 | II | 37 | 7  | 105319819 ATXN7L1;ATXN7L1  | 0.5  | 0.00432  | 2.36443 | 0.39880223 | 0.55962737  | -0.161 |
| cg13264840 | II | 37 | 7  | 142494213                  | 0.58 | 0.00041  | 3.39184 | 0.64945594 | 0.488397165 | 0.161  |
| cg09912552 | II | 37 | 8  | 134250937 NDRG1;NDRG1      | 0.58 | 0.00041  | 3.39184 | 0.66968328 | 0.83073575  | -0.161 |
| cg14827056 | I  | 37 | 8  | 141550539 EIF2C2;EIF2C2    | 0.5  | 0.00432  | 2.36443 | 0.73412552 | 0.895361227 | -0.161 |
| cg14789659 | II | 37 | 10 | 63809073 ARID5B            | 0.54 | 0.0014   | 2.85345 | 0.83007614 | 0.668738834 | 0.161  |
| cg19286437 | I  | 37 | 10 | 88428117 LDB3;LDB3;LDB3;LI | 0.62 | 0.0001   | 3.98291 | 0.6521834  | 0.491450664 | 0.161  |
| cg20728490 | II | 37 | 10 | 98064175 DNNT;DNNT;DNNT;I  | 0.67 | 2.34E-05 | 4.63072 | 0.33778658 | 0.176760323 | 0.161  |
| cg10133725 | II | 37 | 11 | 64981081 SLC22A20          | 0.46 | 0.01197  | 1.92207 | 0.18695455 | 0.348181784 | -0.161 |
| cg23261640 | I  | 37 | 11 | 70280489 CTTN;CTTN         | 0.5  | 0.00432  | 2.36443 | 0.74867262 | 0.587524147 | 0.161  |
| cg18023065 | I  | 37 | 11 | 94278603 FUT4              | 0.5  | 0.00432  | 2.36443 | 0.60563724 | 0.766932574 | -0.161 |
| cg25574603 | II | 37 | 12 | 13256766 GSG1;GSG1         | 0.54 | 0.0014   | 2.85345 | 0.62555999 | 0.464797589 | 0.161  |
| cg22032626 | II | 37 | 12 | 50203811 NCKAP5L           | 0.58 | 0.00041  | 3.39184 | 0.42251768 | 0.583239322 | -0.161 |

|            |    |    |    |                            |      |          |         |            |             |        |
|------------|----|----|----|----------------------------|------|----------|---------|------------|-------------|--------|
| cg00951869 | II | 37 | 14 | 24805349 ADCY4;RIPK3       | 0.58 | 0.00041  | 3.39184 | 0.29642137 | 0.457063483 | -0.161 |
| cg02268192 | II | 37 | 14 | 92981666 RIN3              | 0.46 | 0.01197  | 1.92207 | 0.39676667 | 0.557335359 | -0.161 |
| cg27456487 | I  | 37 | 17 | 56349062 MPO               | 0.62 | 0.0001   | 3.98291 | 0.77102391 | 0.931987713 | -0.161 |
| cg14648237 | II | 37 | 17 | 64422393 PRKCA             | 0.46 | 0.01197  | 1.92207 | 0.4888245  | 0.650281808 | -0.161 |
| cg24723883 | II | 37 | 19 | 2608495 GNG7               | 0.67 | 2.34E-05 | 4.63072 | 0.6471518  | 0.485889936 | 0.161  |
| cg27573549 | I  | 37 | 19 | 56189952 EPN1;EPN1;EPN1    | 0.46 | 0.01197  | 1.92207 | 0.74126112 | 0.579845562 | 0.161  |
| cg26472802 | I  | 37 | 21 | 45713719 AIRE;AIRE         | 0.58 | 0.00041  | 3.39184 | 0.89884212 | 0.73831629  | 0.161  |
| cg01394461 | II | 37 | 1  | 887576 NOC2L               | 0.58 | 0.00041  | 3.39184 | 0.60599922 | 0.765577211 | -0.16  |
| cg04211179 | II | 37 | 1  | 16301562 ZBTB17            | 0.54 | 0.0014   | 2.85345 | 0.49340644 | 0.33317474  | 0.16   |
| cg13977835 | II | 37 | 1  | 23883338                   | 0.62 | 0.0001   | 3.98291 | 0.75820803 | 0.598251392 | 0.16   |
| cg01966665 | II | 37 | 1  | 151137376 SCNM1;LYSMD1;LY  | 0.62 | 0.0001   | 3.98291 | 0.6667738  | 0.827006663 | -0.16  |
| cg15392364 | II | 37 | 1  | 206976689 IL19             | 0.58 | 0.00041  | 3.39184 | 0.84106401 | 0.68074774  | 0.16   |
| cg25743622 | II | 37 | 1  | 223403446 SUSD4            | 0.71 | 4.57E-06 | 5.34042 | 0.73680217 | 0.576523531 | 0.16   |
| cg23014549 | I  | 37 | 1  | 245727587 KIF26B           | 0.5  | 0.00432  | 2.36443 | 0.79840335 | 0.638371628 | 0.16   |
| cg11938718 | II | 37 | 2  | 10526453 HPCAL1;HPCAL1     | 0.54 | 0.0014   | 2.85345 | 0.41210022 | 0.572130784 | -0.16  |
| cg03438773 | II | 37 | 2  | 219974186 NHEJ1            | 0.5  | 0.00432  | 2.36443 | 0.28129447 | 0.441008269 | -0.16  |
| cg18471664 | II | 37 | 3  | 5028143                    | 0.58 | 0.00041  | 3.39184 | 0.25307725 | 0.41354996  | -0.16  |
| cg08033130 | II | 37 | 3  | 45983597 CXCR6;FYCO1       | 0.46 | 0.01197  | 1.92207 | 0.54938867 | 0.709853051 | -0.16  |
| cg04083553 | II | 37 | 3  | 128778575 GP9              | 0.54 | 0.0014   | 2.85345 | 0.58980258 | 0.429979766 | 0.16   |
| cg07181209 | II | 37 | 5  | 153585979 GALNT10          | 0.5  | 0.00432  | 2.36443 | 0.6736531  | 0.83370027  | -0.16  |
| cg13027183 | I  | 37 | 6  | 15504872 JARID2            | 0.46 | 0.01197  | 1.92207 | 0.60401983 | 0.764478268 | -0.16  |
| cg19913563 | II | 37 | 6  | 30720261                   | 0.62 | 0.0001   | 3.98291 | 0.20485015 | 0.36482002  | -0.16  |
| cg26033526 | II | 37 | 6  | 32819858 TAP1              | 0.42 | 0.02991  | 1.52413 | 0.62647485 | 0.466065005 | 0.16   |
| cg26338202 | II | 37 | 6  | 163768326                  | 0.54 | 0.0014   | 2.85345 | 0.70634139 | 0.86625511  | -0.16  |
| cg04342202 | II | 37 | 7  | 1961968 MAD1L1;MAD1L1;M    | 0.5  | 0.00432  | 2.36443 | 0.43602285 | 0.595980146 | -0.16  |
| cg25817701 | I  | 37 | 7  | 2140143 MAD1L1;MAD1L1;M    | 0.58 | 0.00041  | 3.39184 | 0.36596437 | 0.206186141 | 0.16   |
| cg03676485 | II | 37 | 7  | 2563816 LFNG;LFNG;LFNG;LI  | 0.46 | 0.01197  | 1.92207 | 0.5283059  | 0.688674625 | -0.16  |
| cg02052217 | II | 37 | 7  | 99970869 PILRA;PILRA;PILRA | 0.62 | 0.0001   | 3.98291 | 0.64887374 | 0.809238336 | -0.16  |
| cg07243202 | II | 37 | 8  | 134315520                  | 0.67 | 2.34E-05 | 4.63072 | 0.35493581 | 0.515095962 | -0.16  |
| cg14333394 | II | 37 | 9  | 139812357 TRAF2            | 0.58 | 0.00041  | 3.39184 | 0.59588628 | 0.756310744 | -0.16  |
| cg09491962 | II | 37 | 10 | 98900771 SLIT1             | 0.58 | 0.00041  | 3.39184 | 0.59361412 | 0.753787841 | -0.16  |
| cg26983198 | II | 37 | 11 | 1952756 TNNT3;TNNT3;TNN    | 0.5  | 0.00432  | 2.36443 | 0.18510176 | 0.345073293 | -0.16  |
| cg24305156 | II | 37 | 11 | 45871936 CRY2;CRY2         | 0.5  | 0.00432  | 2.36443 | 0.53299854 | 0.69290031  | -0.16  |

|            |    |    |    |           |                   |      |          |         |            |             |        |
|------------|----|----|----|-----------|-------------------|------|----------|---------|------------|-------------|--------|
| cg09374353 | II | 37 | 11 | 64620859  | EHD1              | 0.54 | 0.0014   | 2.85345 | 0.34361857 | 0.183433921 | 0.16   |
| cg11886358 | II | 37 | 11 | 128561007 | FLI1              | 0.58 | 0.00041  | 3.39184 | 0.67689704 | 0.837240381 | -0.16  |
| cg10665892 | II | 37 | 12 | 1921115   | CACNA2D4          | 0.54 | 0.0014   | 2.85345 | 0.60500539 | 0.765225715 | -0.16  |
| cg12018809 | II | 37 | 12 | 6745171   | LPAR5;LPAR5       | 0.54 | 0.0014   | 2.85345 | 0.28180228 | 0.121759045 | 0.16   |
| cg00476608 | II | 37 | 12 | 7044787   | ATN1;ATN1         | 0.5  | 0.00432  | 2.36443 | 0.72314282 | 0.882799437 | -0.16  |
| cg08059719 | II | 37 | 12 | 122444450 |                   | 0.67 | 2.34E-05 | 4.63072 | 0.57778476 | 0.41731725  | 0.16   |
| cg02869235 | II | 37 | 12 | 124726864 |                   | 0.5  | 0.00432  | 2.36443 | 0.63664046 | 0.796807729 | -0.16  |
| cg18960218 | II | 37 | 14 | 23285365  | SLC7A7;SLC7A7;SLC | 0.5  | 0.00432  | 2.36443 | 0.64685829 | 0.806569745 | -0.16  |
| cg17002328 | II | 37 | 14 | 91751773  | CCDC88C           | 0.5  | 0.00432  | 2.36443 | 0.60697965 | 0.446602745 | 0.16   |
| cg21220247 | II | 37 | 14 | 106321936 |                   | 0.5  | 0.00432  | 2.36443 | 0.55156878 | 0.391244837 | 0.16   |
| cg09924669 | II | 37 | 16 | 1593214   | IFT140;TMEM204    | 0.58 | 0.00041  | 3.39184 | 0.37451915 | 0.534183288 | -0.16  |
| cg07451762 | II | 37 | 16 | 28383216  |                   | 0.46 | 0.01197  | 1.92207 | 0.29587105 | 0.455772117 | -0.16  |
| cg10183965 | II | 37 | 17 | 3824497   |                   | 0.54 | 0.0014   | 2.85345 | 0.40775094 | 0.247672339 | 0.16   |
| cg03366884 | II | 37 | 17 | 8844506   | PIK3R5            | 0.54 | 0.0014   | 2.85345 | 0.56197381 | 0.401674521 | 0.16   |
| cg01502320 | II | 37 | 17 | 16875558  | TNFRSF13B         | 0.54 | 0.0014   | 2.85345 | 0.53820688 | 0.378316492 | 0.16   |
| cg13053608 | II | 37 | 17 | 40345673  | GHDC;GHDC;GHDC;   | 0.54 | 0.0014   | 2.85345 | 0.34287587 | 0.502679236 | -0.16  |
| cg16338321 | II | 37 | 17 | 48994958  |                   | 0.58 | 0.00041  | 3.39184 | 0.52530853 | 0.365666245 | 0.16   |
| cg27200257 | II | 37 | 17 | 79816678  | P4HB              | 0.5  | 0.00432  | 2.36443 | 0.6833988  | 0.843050217 | -0.16  |
| cg23141183 | II | 37 | 17 | 80185318  | SLC16A3           | 0.54 | 0.0014   | 2.85345 | 0.68857126 | 0.848296964 | -0.16  |
| cg24112097 | II | 37 | 22 | 50196862  | BRD1              | 0.42 | 0.02991  | 1.52413 | 0.56471446 | 0.404666834 | 0.16   |
| cg06219660 | II | 37 | 1  | 1695509   | NADK              | 0.5  | 0.00432  | 2.36443 | 0.59482864 | 0.754281113 | -0.159 |
| cg10250177 | II | 37 | 1  | 32739752  | LCK;LCK;LCK       | 0.58 | 0.00041  | 3.39184 | 0.30240108 | 0.143533271 | 0.159  |
| cg17171539 | II | 37 | 1  | 59398690  |                   | 0.42 | 0.02991  | 1.52413 | 0.34916415 | 0.508070915 | -0.159 |
| cg08654091 | II | 37 | 1  | 227015418 |                   | 0.54 | 0.0014   | 2.85345 | 0.5102768  | 0.66976688  | -0.159 |
| cg00050692 | II | 37 | 2  | 25524877  | DNMT3A;DNMT3A;    | 0.54 | 0.0014   | 2.85345 | 0.2544575  | 0.41368887  | -0.159 |
| cg11800635 | I  | 37 | 2  | 74783088  | DOK1              | 0.58 | 0.00041  | 3.39184 | 0.63201873 | 0.79057556  | -0.159 |
| cg00514486 | II | 37 | 3  | 49837348  | CDH29             | 0.5  | 0.00432  | 2.36443 | 0.56562341 | 0.724538708 | -0.159 |
| cg03921696 | I  | 37 | 3  | 156848137 |                   | 0.54 | 0.0014   | 2.85345 | 0.69284972 | 0.5343297   | 0.159  |
| cg26668042 | II | 37 | 5  | 1514077   | LPCAT1            | 0.5  | 0.00432  | 2.36443 | 0.47994774 | 0.639432702 | -0.159 |
| cg17071868 | II | 37 | 6  | 33047056  | HLA-DPB1          | 0.46 | 0.01197  | 1.92207 | 0.69705309 | 0.537640786 | 0.159  |
| cg04494800 | II | 37 | 6  | 149775853 | ZC3H12D           | 0.58 | 0.00041  | 3.39184 | 0.39949491 | 0.558207384 | -0.159 |
| cg19730982 | I  | 37 | 7  | 1062729   | C7orf50;MIR339;C7 | 0.46 | 0.01197  | 1.92207 | 0.56497673 | 0.40589283  | 0.159  |
| cg11884933 | II | 37 | 7  | 2774414   | GNA12             | 0.46 | 0.01197  | 1.92207 | 0.19430026 | 0.353472494 | -0.159 |

|            |    |    |    |           |                   |      |         |         |            |             |        |
|------------|----|----|----|-----------|-------------------|------|---------|---------|------------|-------------|--------|
| cg03817667 | I  | 37 | 7  | 54609953  | VSTM2A            | 0.5  | 0.00432 | 2.36443 | 0.1089011  | 0.268158104 | -0.159 |
| cg12743031 | II | 37 | 8  | 27219512  | PTK2B;PTK2B;PTK2B | 0.58 | 0.00041 | 3.39184 | 0.58173732 | 0.422850538 | 0.159  |
| cg26542567 | II | 37 | 8  | 142986670 |                   | 0.46 | 0.01197 | 1.92207 | 0.66481246 | 0.505624115 | 0.159  |
| cg14186336 | II | 37 | 9  | 124045139 | GSN;GSN;GSN;GSN   | 0.58 | 0.00041 | 3.39184 | 0.31249509 | 0.471717841 | -0.159 |
| cg05514971 | II | 37 | 9  | 130329588 | FAM129B;FAM129B   | 0.62 | 0.0001  | 3.98291 | 0.36291517 | 0.521722952 | -0.159 |
| cg22697239 | I  | 37 | 11 | 44626708  | CD82;CD82         | 0.5  | 0.00432 | 2.36443 | 0.67586934 | 0.516772839 | 0.159  |
| cg13408712 | II | 37 | 11 | 129817591 | PRDM10;PRDM10     | 0.54 | 0.0014  | 2.85345 | 0.47684175 | 0.318135337 | 0.159  |
| cg21892295 | II | 37 | 12 | 121157589 | UNC119B           | 0.5  | 0.00432 | 2.36443 | 0.31662704 | 0.475860073 | -0.159 |
| cg15355713 | II | 37 | 12 | 125431744 | DHX37             | 0.5  | 0.00432 | 2.36443 | 0.50725286 | 0.66622522  | -0.159 |
| cg19662895 | II | 37 | 14 | 69074455  |                   | 0.5  | 0.00432 | 2.36443 | 0.33652577 | 0.495412012 | -0.159 |
| cg06142108 | II | 37 | 16 | 19195208  | SYT17             | 0.58 | 0.00041 | 3.39184 | 0.73885818 | 0.897597194 | -0.159 |
| cg08851837 | II | 37 | 16 | 57558820  | CCDC102A          | 0.58 | 0.00041 | 3.39184 | 0.67553146 | 0.834539481 | -0.159 |
| cg21808406 | II | 37 | 17 | 7482475   | CD68;CD68         | 0.5  | 0.00432 | 2.36443 | 0.33727813 | 0.496342743 | -0.159 |
| cg02057796 | II | 37 | 17 | 74530987  | CYGB              | 0.42 | 0.02991 | 1.52413 | 0.60393504 | 0.444463414 | 0.159  |
| cg07126783 | I  | 37 | 17 | 78800767  | RPTOR;RPTOR       | 0.5  | 0.00432 | 2.36443 | 0.29061932 | 0.449387226 | -0.159 |
| cg23948811 | I  | 37 | 17 | 79485043  |                   | 0.54 | 0.0014  | 2.85345 | 0.69945281 | 0.540907051 | 0.159  |
| cg00775818 | II | 37 | 19 | 2431171   | LMNB2             | 0.5  | 0.00432 | 2.36443 | 0.5729887  | 0.7317012   | -0.159 |
| cg02987482 | II | 37 | 19 | 6274208   | MLLT1             | 0.5  | 0.00432 | 2.36443 | 0.31882278 | 0.477590396 | -0.159 |
| cg00637477 | II | 37 | 20 | 62525797  | DNAJC5            | 0.5  | 0.00432 | 2.36443 | 0.17213719 | 0.330840951 | -0.159 |
| cg26861460 | II | 37 | 22 | 44575455  | PARVG;PARVG;PAR   | 0.46 | 0.01197 | 1.92207 | 0.61472928 | 0.774138608 | -0.159 |
| cg00209037 | II | 37 | 22 | 46443395  |                   | 0.54 | 0.0014  | 2.85345 | 0.50961947 | 0.668898122 | -0.159 |
| cg01229567 | II | 37 | 1  | 1549818   | MIB2;MIB2;MIB2    | 0.5  | 0.00432 | 2.36443 | 0.33754046 | 0.495501466 | -0.158 |
| cg10001720 | II | 37 | 1  | 31231363  | LAPTM5            | 0.58 | 0.00041 | 3.39184 | 0.59984054 | 0.757381138 | -0.158 |
| cg04482628 | II | 37 | 1  | 36581751  |                   | 0.58 | 0.00041 | 3.39184 | 0.43359019 | 0.591566283 | -0.158 |
| cg16723381 | II | 37 | 2  | 127590178 |                   | 0.5  | 0.00432 | 2.36443 | 0.28229302 | 0.44005644  | -0.158 |
| cg05861291 | II | 37 | 2  | 207987538 | KLF7              | 0.46 | 0.01197 | 1.92207 | 0.6504403  | 0.492120783 | 0.158  |
| cg05583921 | I  | 37 | 3  | 42700678  | ZBTB47            | 0.54 | 0.0014  | 2.85345 | 0.67890211 | 0.836802846 | -0.158 |
| cg02241759 | II | 37 | 3  | 119528300 | NR1I2;NR1I2;NR1I2 | 0.54 | 0.0014  | 2.85345 | 0.27562694 | 0.43357912  | -0.158 |
| cg08763102 | II | 37 | 4  | 3079751   | HTT               | 0.5  | 0.00432 | 2.36443 | 0.35868165 | 0.200886794 | 0.158  |
| cg15834072 | I  | 37 | 4  | 155411603 | DCHS2;DCHS2       | 0.42 | 0.02991 | 1.52413 | 0.11941131 | 0.277421044 | -0.158 |
| cg16248329 | I  | 37 | 4  | 187644739 | FAT1              | 0.5  | 0.00432 | 2.36443 | 0.06115178 | 0.219581776 | -0.158 |
| cg26249135 | II | 37 | 6  | 32026147  | TNXB              | 0.42 | 0.02991 | 1.52413 | 0.72824569 | 0.570269743 | 0.158  |
| cg24147543 | II | 37 | 6  | 32554481  | HLA-DRB1          | 0.46 | 0.01197 | 1.92207 | 0.28187458 | 0.124209785 | 0.158  |

|            |    |    |    |           |                    |      |          |         |            |             |        |
|------------|----|----|----|-----------|--------------------|------|----------|---------|------------|-------------|--------|
| cg22904406 | II | 37 | 6  | 33288296  | DAXX;DAXX;DAXX;I   | 0.58 | 0.00041  | 3.39184 | 0.69143179 | 0.849071566 | -0.158 |
| cg14407179 | I  | 37 | 7  | 963768    | ADAP1              | 0.54 | 0.0014   | 2.85345 | 0.79894947 | 0.640562107 | 0.158  |
| cg17974145 | II | 37 | 7  | 101671556 | CUX1;CUX1;CUX1     | 0.46 | 0.01197  | 1.92207 | 0.62448771 | 0.782132405 | -0.158 |
| cg19882784 | II | 37 | 7  | 134856562 | C7orf49;C7orf49;C7 | 0.5  | 0.00432  | 2.36443 | 0.51727049 | 0.675651954 | -0.158 |
| cg02490460 | II | 37 | 8  | 1365502   |                    | 0.46 | 0.01197  | 1.92207 | 0.61772506 | 0.775300778 | -0.158 |
| cg10327067 | II | 37 | 8  | 37549202  |                    | 0.58 | 0.00041  | 3.39184 | 0.25551954 | 0.413597323 | -0.158 |
| cg23677272 | II | 37 | 8  | 70748063  | SLCO5A1            | 0.58 | 0.00041  | 3.39184 | 0.40677956 | 0.564806093 | -0.158 |
| cg20133200 | I  | 37 | 10 | 3141887   | PFKP               | 0.58 | 0.00041  | 3.39184 | 0.64681737 | 0.804581232 | -0.158 |
| cg16704703 | II | 37 | 10 | 3509710   |                    | 0.54 | 0.0014   | 2.85345 | 0.54657427 | 0.704503865 | -0.158 |
| cg11199437 | II | 37 | 10 | 39023045  |                    | 0.5  | 0.00432  | 2.36443 | 0.32747997 | 0.48510546  | -0.158 |
| cg15009090 | II | 37 | 11 | 64163340  |                    | 0.54 | 0.0014   | 2.85345 | 0.2809411  | 0.439076398 | -0.158 |
| cg11973132 | II | 37 | 11 | 67052656  | ADRBK1             | 0.71 | 4.57E-06 | 5.34042 | 0.59563986 | 0.75384651  | -0.158 |
| cg25429672 | II | 37 | 11 | 73692155  | UCP2               | 0.54 | 0.0014   | 2.85345 | 0.70999423 | 0.551986243 | 0.158  |
| cg19100884 | I  | 37 | 13 | 114825082 | RASA3              | 0.46 | 0.01197  | 1.92207 | 0.68594322 | 0.84376163  | -0.158 |
| cg10975863 | II | 37 | 14 | 68830704  | RAD51L1;RAD51L1;   | 0.46 | 0.01197  | 1.92207 | 0.57400932 | 0.731756868 | -0.158 |
| cg22908922 | II | 37 | 14 | 105855008 | PACS2;PACS2        | 0.62 | 0.0001   | 3.98291 | 0.57840418 | 0.73593439  | -0.158 |
| cg23731826 | II | 37 | 15 | 90371692  |                    | 0.5  | 0.00432  | 2.36443 | 0.63246204 | 0.790917595 | -0.158 |
| cg16649560 | II | 37 | 16 | 27338391  | IL4R;IL4R          | 0.54 | 0.0014   | 2.85345 | 0.29174403 | 0.449629129 | -0.158 |
| cg17074014 | I  | 37 | 17 | 3704494   | ITGAE;ITGAE        | 0.5  | 0.00432  | 2.36443 | 0.71492902 | 0.872493229 | -0.158 |
| cg10115918 | I  | 37 | 17 | 80922807  | B3GNTL1            | 0.58 | 0.00041  | 3.39184 | 0.64854536 | 0.490649288 | 0.158  |
| cg24165638 | II | 37 | 19 | 831456    | AZU1               | 0.5  | 0.00432  | 2.36443 | 0.64092355 | 0.798886568 | -0.158 |
| cg15770046 | II | 37 | 19 | 35764710  | USF2;USF2          | 0.58 | 0.00041  | 3.39184 | 0.59183082 | 0.749443293 | -0.158 |
| cg26540515 | II | 37 | 20 | 896349    | ANGPT4             | 0.62 | 0.0001   | 3.98291 | 0.61965378 | 0.777578005 | -0.158 |
| cg22335872 | II | 37 | 20 | 896876    | ANGPT4;ANGPT4      | 0.54 | 0.0014   | 2.85345 | 0.66341853 | 0.505033023 | 0.158  |
| cg26576937 | II | 37 | 20 | 2739938   | EBF4               | 0.46 | 0.01197  | 1.92207 | 0.57955732 | 0.42165897  | 0.158  |
| cg01377358 | II | 37 | 20 | 30948211  | ASXL1;ASXL1        | 0.42 | 0.02991  | 1.52413 | 0.64291084 | 0.484884381 | 0.158  |
| cg07211972 | II | 37 | 21 | 44473496  | CBS                | 0.58 | 0.00041  | 3.39184 | 0.73285152 | 0.890850246 | -0.158 |
| cg24349631 | I  | 37 | 22 | 46449752  | C22orf26;LOC15031  | 0.42 | 0.02991  | 1.52413 | 0.12550351 | 0.283317745 | -0.158 |
| cg20018425 | II | 37 | 22 | 50614877  | PANX2;PANX2;PAN    | 0.42 | 0.02991  | 1.52413 | 0.45546188 | 0.29699249  | 0.158  |
| cg24534743 | II | 37 | 1  | 27884345  | AHDC1              | 0.5  | 0.00432  | 2.36443 | 0.39630415 | 0.553437708 | -0.157 |
| cg11257300 | II | 37 | 1  | 113229103 | MOV10;MOV10        | 0.46 | 0.01197  | 1.92207 | 0.73265818 | 0.575196591 | 0.157  |
| cg08247583 | I  | 37 | 1  | 120927113 | FCGR1B;FCGR1B      | 0.54 | 0.0014   | 2.85345 | 0.55506194 | 0.712512102 | -0.157 |
| cg19907725 | II | 37 | 1  | 153539397 | S100A2             | 0.62 | 0.0001   | 3.98291 | 0.57093976 | 0.728143959 | -0.157 |

|            |    |    |    |                            |      |          |         |            |             |        |
|------------|----|----|----|----------------------------|------|----------|---------|------------|-------------|--------|
| cg21567649 | II | 37 | 2  | 43245642                   | 0.71 | 4.57E-06 | 5.34042 | 0.37523615 | 0.532424367 | -0.157 |
| cg12082609 | II | 37 | 2  | 66671727 MEIS1             | 0.54 | 0.0014   | 2.85345 | 0.23609859 | 0.392642864 | -0.157 |
| cg17161250 | I  | 37 | 2  | 106682209 C2orf40;C2orf40  | 0.54 | 0.0014   | 2.85345 | 0.03736286 | 0.193882742 | -0.157 |
| cg21865845 | II | 37 | 3  | 79815848 ROBO1             | 0.54 | 0.0014   | 2.85345 | 0.31553019 | 0.472866783 | -0.157 |
| cg19982684 | II | 37 | 3  | 128403035                  | 0.54 | 0.0014   | 2.85345 | 0.42044728 | 0.577384811 | -0.157 |
| cg04761746 | II | 37 | 4  | 141177756 SCOC             | 0.58 | 0.00041  | 3.39184 | 0.49911798 | 0.655743319 | -0.157 |
| cg17542330 | II | 37 | 5  | 79445875 SERINC5           | 0.58 | 0.00041  | 3.39184 | 0.54861115 | 0.705238222 | -0.157 |
| cg18899797 | II | 37 | 5  | 139120060                  | 0.5  | 0.00432  | 2.36443 | 0.48776991 | 0.33083505  | 0.157  |
| cg23327334 | II | 37 | 5  | 176855304 GRK6;GRK6;GRK6   | 0.58 | 0.00041  | 3.39184 | 0.27551542 | 0.432129904 | -0.157 |
| cg23740758 | I  | 37 | 6  | 11324433 NEDD9             | 0.54 | 0.0014   | 2.85345 | 0.67844432 | 0.835102112 | -0.157 |
| cg23666117 | II | 37 | 6  | 31629909 C6orf47;BAT4      | 0.5  | 0.00432  | 2.36443 | 0.43792485 | 0.595185107 | -0.157 |
| cg18336453 | II | 37 | 6  | 43082296 PTK7;PTK7;PTK7;PT | 0.58 | 0.00041  | 3.39184 | 0.41507803 | 0.571777795 | -0.157 |
| cg10089657 | II | 37 | 7  | 1062820 C7orf50;MIR339;C7  | 0.46 | 0.01197  | 1.92207 | 0.45650059 | 0.299438944 | 0.157  |
| cg19972822 | II | 37 | 7  | 138778744 ZC3HAV1;ZC3HAV1  | 0.62 | 0.0001   | 3.98291 | 0.5976113  | 0.440620346 | 0.157  |
| cg13439189 | II | 37 | 9  | 93926553                   | 0.62 | 0.0001   | 3.98291 | 0.58717437 | 0.430370883 | 0.157  |
| cg04813697 | I  | 37 | 10 | 22920025 PIP4K2A           | 0.46 | 0.01197  | 1.92207 | 0.62006349 | 0.462665005 | 0.157  |
| cg24505713 | II | 37 | 11 | 10770035                   | 0.5  | 0.00432  | 2.36443 | 0.18950052 | 0.346354414 | -0.157 |
| cg17125472 | I  | 37 | 11 | 69259831                   | 0.54 | 0.0014   | 2.85345 | 0.61011325 | 0.767515717 | -0.157 |
| cg25570864 | II | 37 | 13 | 112838390                  | 0.62 | 0.0001   | 3.98291 | 0.61289814 | 0.769852531 | -0.157 |
| cg00105306 | II | 37 | 15 | 85194978 WDR73             | 0.5  | 0.00432  | 2.36443 | 0.69514481 | 0.851801174 | -0.157 |
| cg09408143 | II | 37 | 16 | 524778 RAB11FIP3;RAB11F    | 0.46 | 0.01197  | 1.92207 | 0.58732454 | 0.744322685 | -0.157 |
| cg06767314 | II | 37 | 17 | 1085381 ABR                | 0.42 | 0.02991  | 1.52413 | 0.77684792 | 0.619737731 | 0.157  |
| cg13203480 | II | 37 | 17 | 16875349 TNFRSF13B         | 0.46 | 0.01197  | 1.92207 | 0.7327053  | 0.576142152 | 0.157  |
| cg26628751 | II | 37 | 17 | 80981644 B3GNTL1           | 0.5  | 0.00432  | 2.36443 | 0.61997253 | 0.777200607 | -0.157 |
| cg15224459 | II | 37 | 17 | 81042023 METRNL            | 0.54 | 0.0014   | 2.85345 | 0.32998463 | 0.487167682 | -0.157 |
| cg14663914 | II | 37 | 19 | 827739 AZU1                | 0.54 | 0.0014   | 2.85345 | 0.37342461 | 0.530234767 | -0.157 |
| cg05257528 | II | 37 | 19 | 846179 PRTN3               | 0.67 | 2.34E-05 | 4.63072 | 0.58858247 | 0.745752205 | -0.157 |
| cg14781778 | II | 37 | 22 | 45608692 C22orf9;C22orf9   | 0.62 | 0.0001   | 3.98291 | 0.74516639 | 0.901918881 | -0.157 |
| cg10177197 | II | 37 | 1  | 55316481 DHCR24            | 0.62 | 0.0001   | 3.98291 | 0.71223883 | 0.868465297 | -0.156 |
| cg20335425 | I  | 37 | 1  | 153363264 S100A8           | 0.46 | 0.01197  | 1.92207 | 0.53534422 | 0.690937433 | -0.156 |
| cg10503610 | II | 37 | 1  | 154833121 KCNN3;KCNN3      | 0.42 | 0.02991  | 1.52413 | 0.42239575 | 0.266726448 | 0.156  |
| cg19272720 | II | 37 | 1  | 204289444 PLEKHA6          | 0.58 | 0.00041  | 3.39184 | 0.77224219 | 0.616136714 | 0.156  |
| cg02641801 | II | 37 | 2  | 26213508                   | 0.67 | 2.34E-05 | 4.63072 | 0.38418337 | 0.539846756 | -0.156 |

|            |    |    |    |           |                   |      |          |         |            |             |        |
|------------|----|----|----|-----------|-------------------|------|----------|---------|------------|-------------|--------|
| cg15135286 | II | 37 | 2  | 33359281  | LTBP1;LTBP1;LTBP1 | 0.46 | 0.01197  | 1.92207 | 0.69039163 | 0.846577381 | -0.156 |
| cg09133511 | II | 37 | 2  | 113384907 |                   | 0.62 | 0.0001   | 3.98291 | 0.27973329 | 0.43546822  | -0.156 |
| cg06541968 | II | 37 | 2  | 240431144 |                   | 0.62 | 0.0001   | 3.98291 | 0.59752948 | 0.75381237  | -0.156 |
| cg24277586 | II | 37 | 3  | 52099561  | C3orf74           | 0.62 | 0.0001   | 3.98291 | 0.40862207 | 0.564173945 | -0.156 |
| cg06164260 | II | 37 | 3  | 187454439 | BCL6;BCL6         | 0.62 | 0.0001   | 3.98291 | 0.32220991 | 0.477823008 | -0.156 |
| cg11697194 | I  | 37 | 5  | 964196    |                   | 0.5  | 0.00432  | 2.36443 | 0.60321028 | 0.446710925 | 0.156  |
| cg23384708 | II | 37 | 6  | 31544934  | TNF               | 0.58 | 0.00041  | 3.39184 | 0.59878265 | 0.442607799 | 0.156  |
| cg21769820 | II | 37 | 7  | 625136    | PRKAR1B;PRKAR1B   | 0.54 | 0.0014   | 2.85345 | 0.74357912 | 0.587772297 | 0.156  |
| cg21511321 | II | 37 | 7  | 1004997   | COX19             | 0.67 | 2.34E-05 | 4.63072 | 0.34942774 | 0.505242245 | -0.156 |
| cg02827175 | II | 37 | 7  | 1986245   | MAD1L1;MAD1L1;M   | 0.58 | 0.00041  | 3.39184 | 0.70522397 | 0.861492849 | -0.156 |
| cg04222728 | II | 37 | 7  | 138549665 | KIAA1549;KIAA1549 | 0.62 | 0.0001   | 3.98291 | 0.72093441 | 0.876941879 | -0.156 |
| cg01049678 | II | 37 | 7  | 150147536 | GIMAP8            | 0.54 | 0.0014   | 2.85345 | 0.29427669 | 0.450231554 | -0.156 |
| cg04058799 | II | 37 | 7  | 151547969 | PRKAG2            | 0.58 | 0.00041  | 3.39184 | 0.53813004 | 0.694470952 | -0.156 |
| cg11201447 | II | 37 | 8  | 128808063 | MIR1204;PVT1      | 0.46 | 0.01197  | 1.92207 | 0.46157622 | 0.305737936 | 0.156  |
| cg00918944 | II | 37 | 9  | 35908117  | LOC158376         | 0.58 | 0.00041  | 3.39184 | 0.23925541 | 0.395586659 | -0.156 |
| cg06083652 | II | 37 | 10 | 1531529   | ADARB2            | 0.5  | 0.00432  | 2.36443 | 0.50347958 | 0.347480954 | 0.156  |
| cg25124276 | I  | 37 | 10 | 25464008  | LOC100128811;GPI  | 0.54 | 0.0014   | 2.85345 | 0.09735061 | 0.25378448  | -0.156 |
| cg20671781 | I  | 37 | 10 | 43626471  |                   | 0.58 | 0.00041  | 3.39184 | 0.76876858 | 0.925106171 | -0.156 |
| cg20276630 | I  | 37 | 10 | 97055439  |                   | 0.71 | 4.57E-06 | 5.34042 | 0.35512477 | 0.19910397  | 0.156  |
| cg16783349 | I  | 37 | 10 | 130854343 |                   | 0.5  | 0.00432  | 2.36443 | 0.83016629 | 0.674621541 | 0.156  |
| cg25522867 | II | 37 | 11 | 34236648  | ABTB2             | 0.54 | 0.0014   | 2.85345 | 0.72778614 | 0.571744291 | 0.156  |
| cg23746050 | II | 37 | 11 | 69063559  | MYEOV             | 0.5  | 0.00432  | 2.36443 | 0.52039407 | 0.363918042 | 0.156  |
| cg17150898 | I  | 37 | 12 | 1702116   | FBXL14            | 0.67 | 2.34E-05 | 4.63072 | 0.65087124 | 0.495037453 | 0.156  |
| cg17208953 | II | 37 | 12 | 108054842 |                   | 0.5  | 0.00432  | 2.36443 | 0.71866726 | 0.874657707 | -0.156 |
| cg08289839 | II | 37 | 13 | 111318640 | CARS2             | 0.5  | 0.00432  | 2.36443 | 0.60565293 | 0.761258012 | -0.156 |
| cg07296256 | I  | 37 | 13 | 113438010 | ATP11A;ATP11A     | 0.67 | 2.34E-05 | 4.63072 | 0.25939266 | 0.415187653 | -0.156 |
| cg00158530 | II | 37 | 16 | 69966973  | MIR140;WWP2;WV    | 0.46 | 0.01197  | 1.92207 | 0.68072221 | 0.83651765  | -0.156 |
| cg20551922 | II | 37 | 17 | 4391282   | SPNS3             | 0.75 | 7.61E-07 | 6.11857 | 0.66176941 | 0.817958076 | -0.156 |
| cg22433759 | II | 37 | 17 | 71824272  | C17orf54          | 0.54 | 0.0014   | 2.85345 | 0.59421156 | 0.74993134  | -0.156 |
| cg08012219 | II | 37 | 17 | 76913036  | TIMP2             | 0.46 | 0.01197  | 1.92207 | 0.5649486  | 0.720587632 | -0.156 |
| cg02569115 | II | 37 | 17 | 76922138  | TIMP2             | 0.62 | 0.0001   | 3.98291 | 0.43622437 | 0.5918901   | -0.156 |
| cg10194602 | II | 37 | 17 | 78038139  | CCDC40            | 0.5  | 0.00432  | 2.36443 | 0.44110581 | 0.597381661 | -0.156 |
| cg25256099 | II | 37 | 17 | 79484960  |                   | 0.42 | 0.02991  | 1.52413 | 0.34432734 | 0.187996074 | 0.156  |

|            |    |    |    |                            |      |          |         |            |             |        |
|------------|----|----|----|----------------------------|------|----------|---------|------------|-------------|--------|
| cg07083818 | II | 37 | 19 | 18385672 KIAA1683;KIAA168: | 0.58 | 0.00041  | 3.39184 | 0.6689819  | 0.824690889 | -0.156 |
| cg13496662 | I  | 37 | 19 | 45416369                   | 0.54 | 0.0014   | 2.85345 | 0.37494363 | 0.531191442 | -0.156 |
| cg14792008 | II | 37 | 19 | 49607581 SNRNP70           | 0.46 | 0.01197  | 1.92207 | 0.61727107 | 0.461133632 | 0.156  |
| cg26267561 | II | 37 | 20 | 3052224 OXT                | 0.58 | 0.00041  | 3.39184 | 0.49253241 | 0.648907612 | -0.156 |
| cg05056497 | II | 37 | 21 | 35899448 RCAN1;RCAN1;RCA   | 0.5  | 0.00432  | 2.36443 | 0.64304565 | 0.486849856 | 0.156  |
| cg04096368 | II | 37 | 21 | 43988782 SLC37A1           | 0.42 | 0.02991  | 1.52413 | 0.63787029 | 0.481885848 | 0.156  |
| cg06430509 | II | 37 | 21 | 44853470                   | 0.54 | 0.0014   | 2.85345 | 0.73704182 | 0.581205236 | 0.156  |
| cg05992904 | I  | 37 | 22 | 48892994 FAM19A5           | 0.42 | 0.02991  | 1.52413 | 0.69420727 | 0.849756382 | -0.156 |
| cg25940513 | II | 37 | 1  | 9326282 H6PD               | 0.62 | 0.0001   | 3.98291 | 0.52719547 | 0.682479355 | -0.155 |
| cg12547807 | II | 37 | 1  | 9473751                    | 0.58 | 0.00041  | 3.39184 | 0.29345788 | 0.138363641 | 0.155  |
| cg22799499 | II | 37 | 1  | 40773045 COL9A2            | 0.5  | 0.00432  | 2.36443 | 0.60608622 | 0.760716317 | -0.155 |
| cg02988730 | II | 37 | 1  | 110167509 AMPD2;AMPD2;AM   | 0.42 | 0.02991  | 1.52413 | 0.6036991  | 0.449045528 | 0.155  |
| cg27159979 | II | 37 | 2  | 60763331 BCL11A;BCL11A;BC  | 0.5  | 0.00432  | 2.36443 | 0.66825878 | 0.513063953 | 0.155  |
| cg07220903 | II | 37 | 3  | 46973284 CCDC12            | 0.54 | 0.0014   | 2.85345 | 0.24669046 | 0.401550476 | -0.155 |
| cg14092988 | I  | 37 | 3  | 52407081 DNAH1             | 0.54 | 0.0014   | 2.85345 | 0.7308521  | 0.886087234 | -0.155 |
| cg01016119 | II | 37 | 3  | 56835282 ARHGEF3;ARHGEF3   | 0.58 | 0.00041  | 3.39184 | 0.50336485 | 0.348545044 | 0.155  |
| cg02855045 | II | 37 | 3  | 72777245                   | 0.46 | 0.01197  | 1.92207 | 0.44714197 | 0.602385529 | -0.155 |
| cg07333191 | II | 37 | 4  | 13526769                   | 0.54 | 0.0014   | 2.85345 | 0.40402321 | 0.558870842 | -0.155 |
| cg17582074 | II | 37 | 4  | 83189641                   | 0.62 | 0.0001   | 3.98291 | 0.22575235 | 0.380747222 | -0.155 |
| cg08354216 | II | 37 | 4  | 146951349                  | 0.67 | 2.34E-05 | 4.63072 | 0.44869691 | 0.293717101 | 0.155  |
| cg10967114 | II | 37 | 5  | 150442668 TNIP1            | 0.58 | 0.00041  | 3.39184 | 0.76588699 | 0.920439483 | -0.155 |
| cg01999566 | II | 37 | 6  | 30624449 DHX16;DHX16       | 0.62 | 0.0001   | 3.98291 | 0.28112787 | 0.436283476 | -0.155 |
| cg13423389 | I  | 37 | 6  | 30656508 KIAA1949;NRM;KIA  | 0.54 | 0.0014   | 2.85345 | 0.5146237  | 0.35992928  | 0.155  |
| cg08469255 | I  | 37 | 6  | 30851069 DDR1;DDR1         | 0.58 | 0.00041  | 3.39184 | 0.58560374 | 0.430776483 | 0.155  |
| cg10365886 | I  | 37 | 6  | 32063874 TNXB              | 0.54 | 0.0014   | 2.85345 | 0.6191432  | 0.773848483 | -0.155 |
| cg02382532 | II | 37 | 6  | 42110867 C6orf132          | 0.58 | 0.00041  | 3.39184 | 0.57562045 | 0.730336512 | -0.155 |
| cg03081478 | II | 37 | 7  | 2773127 GNA12              | 0.54 | 0.0014   | 2.85345 | 0.16302061 | 0.318294027 | -0.155 |
| cg16248756 | II | 37 | 7  | 127795594                  | 0.54 | 0.0014   | 2.85345 | 0.23938477 | 0.39390791  | -0.155 |
| cg14023009 | I  | 37 | 8  | 1870798 ARHGEF10           | 0.5  | 0.00432  | 2.36443 | 0.25787691 | 0.413157895 | -0.155 |
| cg06049177 | II | 37 | 8  | 30583924 GSR               | 0.54 | 0.0014   | 2.85345 | 0.66197476 | 0.816528928 | -0.155 |
| cg03481855 | II | 37 | 8  | 129089293 PVT1             | 0.5  | 0.00432  | 2.36443 | 0.74191672 | 0.586547932 | 0.155  |
| cg17088014 | II | 37 | 8  | 134066590 SLA;TG;SLA;SLA   | 0.5  | 0.00432  | 2.36443 | 0.59586306 | 0.750901945 | -0.155 |
| cg00152340 | I  | 37 | 8  | 144297019 GPIHBP1          | 0.58 | 0.00041  | 3.39184 | 0.8276953  | 0.672655825 | 0.155  |

|            |    |    |    |                          |      |          |         |            |             |        |
|------------|----|----|----|--------------------------|------|----------|---------|------------|-------------|--------|
| cg21170085 | I  | 37 | 9  | 137645730 COL5A1         | 0.46 | 0.01197  | 1.92207 | 0.78279934 | 0.627910761 | 0.155  |
| cg03171770 | I  | 37 | 10 | 43393728                 | 0.54 | 0.0014   | 2.85345 | 0.19012388 | 0.345345945 | -0.155 |
| cg04894537 | II | 37 | 11 | 2763171 KCNQ1;KCNQ1      | 0.5  | 0.00432  | 2.36443 | 0.31558539 | 0.471009605 | -0.155 |
| cg20518446 | I  | 37 | 11 | 62315034 AHNAK;AHNAK     | 0.5  | 0.00432  | 2.36443 | 0.61227693 | 0.767499626 | -0.155 |
| cg16024530 | II | 37 | 11 | 128673534 FLI1;FLI1      | 0.54 | 0.0014   | 2.85345 | 0.3282557  | 0.482999403 | -0.155 |
| cg10623198 | II | 37 | 12 | 6949114 GNB3             | 0.62 | 0.0001   | 3.98291 | 0.61947601 | 0.464880579 | 0.155  |
| cg04473902 | II | 37 | 12 | 14721288 PLBD1           | 0.58 | 0.00041  | 3.39184 | 0.57730297 | 0.732057429 | -0.155 |
| cg03468072 | II | 37 | 12 | 39539422                 | 0.67 | 2.34E-05 | 4.63072 | 0.34903051 | 0.504497074 | -0.155 |
| cg04920032 | II | 37 | 12 | 50262986 FAIM2           | 0.54 | 0.0014   | 2.85345 | 0.5168583  | 0.671807627 | -0.155 |
| cg08875297 | II | 37 | 12 | 56127068                 | 0.54 | 0.0014   | 2.85345 | 0.55716029 | 0.402516339 | 0.155  |
| cg18795232 | I  | 37 | 12 | 121890163 KDM2B;KDM2B    | 0.58 | 0.00041  | 3.39184 | 0.52736112 | 0.68200053  | -0.155 |
| cg20628942 | II | 37 | 13 | 114171501 TMCO3          | 0.46 | 0.01197  | 1.92207 | 0.68899112 | 0.84370021  | -0.155 |
| cg04928930 | II | 37 | 14 | 20926227 TMEM55B;TMEM55B | 0.5  | 0.00432  | 2.36443 | 0.65684624 | 0.811351141 | -0.155 |
| cg24231804 | II | 37 | 15 | 67316861                 | 0.67 | 2.34E-05 | 4.63072 | 0.22817839 | 0.382768204 | -0.155 |
| cg13079123 | I  | 37 | 15 | 67331913                 | 0.54 | 0.0014   | 2.85345 | 0.30542898 | 0.460489577 | -0.155 |
| cg12349571 | I  | 37 | 15 | 70364359 TLE3;TLE3;TLE3  | 0.5  | 0.00432  | 2.36443 | 0.8145799  | 0.659366872 | 0.155  |
| cg00657780 | II | 37 | 16 | 50285254                 | 0.58 | 0.00041  | 3.39184 | 0.70666414 | 0.861750042 | -0.155 |
| cg18177814 | II | 37 | 16 | 50730881 NOD2            | 0.62 | 0.0001   | 3.98291 | 0.37950649 | 0.534400153 | -0.155 |
| cg05757530 | II | 37 | 16 | 57038916 NLRC5           | 0.62 | 0.0001   | 3.98291 | 0.68752303 | 0.53263386  | 0.155  |
| cg03987842 | II | 37 | 16 | 68321858 SLC7A6;SLC7A6   | 0.5  | 0.00432  | 2.36443 | 0.71756473 | 0.562625115 | 0.155  |
| cg04324917 | II | 37 | 16 | 87734877 LOC100129637    | 0.42 | 0.02991  | 1.52413 | 0.57119604 | 0.416544876 | 0.155  |
| cg09437994 | I  | 37 | 16 | 89035147 CBFA2T3         | 0.58 | 0.00041  | 3.39184 | 0.74395168 | 0.588720049 | 0.155  |
| cg13984928 | I  | 37 | 17 | 3704574 ITGAE            | 0.54 | 0.0014   | 2.85345 | 0.79426148 | 0.948923149 | -0.155 |
| cg26284483 | II | 37 | 17 | 30184997 C17orf79        | 0.58 | 0.00041  | 3.39184 | 0.52807704 | 0.683277984 | -0.155 |
| cg11804928 | II | 37 | 17 | 38220298 THRA;THRA       | 0.62 | 0.0001   | 3.98291 | 0.35345782 | 0.507981415 | -0.155 |
| cg12812662 | II | 37 | 17 | 41857603 DUSP3;C17orf105 | 0.75 | 7.61E-07 | 6.11857 | 0.25083779 | 0.405339356 | -0.155 |
| cg04014328 | I  | 37 | 17 | 46653615 HOXB4           | 0.58 | 0.00041  | 3.39184 | 0.63391956 | 0.788631149 | -0.155 |
| cg07728250 | II | 37 | 17 | 55655754 MSI2;MSI2       | 0.58 | 0.00041  | 3.39184 | 0.62356837 | 0.7782653   | -0.155 |
| cg01698392 | II | 37 | 17 | 76871734 TIMP2           | 0.62 | 0.0001   | 3.98291 | 0.44219129 | 0.596973828 | -0.155 |
| cg09253473 | II | 37 | 17 | 79877389 MAFG;MAFG;SIRT7 | 0.67 | 2.34E-05 | 4.63072 | 0.55331449 | 0.708358209 | -0.155 |
| cg25298189 | II | 37 | 19 | 935259 ARID3A            | 0.54 | 0.0014   | 2.85345 | 0.40030825 | 0.555392096 | -0.155 |
| cg11355029 | I  | 37 | 19 | 6276660 MLLT1            | 0.58 | 0.00041  | 3.39184 | 0.61475795 | 0.76970347  | -0.155 |
| cg19644670 | II | 37 | 19 | 17185523 MYO9B;MYO9B;HA  | 0.46 | 0.01197  | 1.92207 | 0.30499574 | 0.149622368 | 0.155  |

|            |    |    |    |           |                   |      |          |         |            |             |        |
|------------|----|----|----|-----------|-------------------|------|----------|---------|------------|-------------|--------|
| cg13554818 | II | 37 | 19 | 43979316  | PHLDB3            | 0.46 | 0.01197  | 1.92207 | 0.26230922 | 0.417022823 | -0.155 |
| cg14562523 | II | 37 | 21 | 43528734  | C21orf128;UMODL   | 0.46 | 0.01197  | 1.92207 | 0.44671179 | 0.291944504 | 0.155  |
| cg12222277 | II | 37 | 1  | 2191658   | SKI               | 0.5  | 0.00432  | 2.36443 | 0.62421629 | 0.778027282 | -0.154 |
| cg09322534 | II | 37 | 1  | 43427192  |                   | 0.5  | 0.00432  | 2.36443 | 0.7112733  | 0.557394123 | 0.154  |
| cg07426848 | II | 37 | 1  | 153521712 | S100A3;S100A3     | 0.5  | 0.00432  | 2.36443 | 0.60201248 | 0.448461815 | 0.154  |
| cg03511957 | II | 37 | 1  | 167765211 |                   | 0.62 | 0.0001   | 3.98291 | 0.6044567  | 0.758171955 | -0.154 |
| cg05455036 | II | 37 | 1  | 202828149 |                   | 0.58 | 0.00041  | 3.39184 | 0.28991382 | 0.444333436 | -0.154 |
| cg10574566 | II | 37 | 1  | 203377808 |                   | 0.46 | 0.01197  | 1.92207 | 0.37249018 | 0.526007335 | -0.154 |
| cg19823512 | II | 37 | 1  | 203489725 |                   | 0.58 | 0.00041  | 3.39184 | 0.5120686  | 0.666025595 | -0.154 |
| cg10117369 | II | 37 | 1  | 203734256 | LAX1;LAX1         | 0.62 | 0.0001   | 3.98291 | 0.50845638 | 0.354762281 | 0.154  |
| cg14118850 | II | 37 | 2  | 10447890  | HPCAL1;HPCAL1     | 0.58 | 0.00041  | 3.39184 | 0.51657632 | 0.670599343 | -0.154 |
| cg22805603 | II | 37 | 2  | 32490766  | NLRC4;NLRC4       | 0.46 | 0.01197  | 1.92207 | 0.70059158 | 0.854803809 | -0.154 |
| cg17258387 | II | 37 | 2  | 174924430 |                   | 0.46 | 0.01197  | 1.92207 | 0.30874956 | 0.462447278 | -0.154 |
| cg08162476 | I  | 37 | 3  | 13064001  | IQSEC1            | 0.5  | 0.00432  | 2.36443 | 0.4766986  | 0.32270856  | 0.154  |
| cg01357892 | II | 37 | 3  | 126191181 | ZXDC;ZXDC         | 0.54 | 0.0014   | 2.85345 | 0.27534448 | 0.429110203 | -0.154 |
| cg02832697 | II | 37 | 4  | 154126481 | TRIM2;TRIM2       | 0.5  | 0.00432  | 2.36443 | 0.3407521  | 0.187043495 | 0.154  |
| cg13826452 | II | 37 | 6  | 26758395  |                   | 0.46 | 0.01197  | 1.92207 | 0.42923822 | 0.583127279 | -0.154 |
| cg14205216 | II | 37 | 6  | 33877308  |                   | 0.5  | 0.00432  | 2.36443 | 0.68184933 | 0.836293442 | -0.154 |
| cg19382157 | I  | 37 | 7  | 2124566   | MAD1L1;MAD1L1;M   | 0.54 | 0.0014   | 2.85345 | 0.65157599 | 0.805409552 | -0.154 |
| cg26438325 | II | 37 | 7  | 28176718  | JAZF1             | 0.62 | 0.0001   | 3.98291 | 0.69974512 | 0.8536516   | -0.154 |
| cg14519534 | II | 37 | 7  | 102082149 | ORAI2;ORAI2       | 0.46 | 0.01197  | 1.92207 | 0.35583258 | 0.20192071  | 0.154  |
| cg16703934 | II | 37 | 7  | 128786732 | TSPAN33           | 0.54 | 0.0014   | 2.85345 | 0.73972    | 0.585436247 | 0.154  |
| cg03979241 | I  | 37 | 8  | 21916824  | EPB49;EPB49;EPB4  | 0.67 | 2.34E-05 | 4.63072 | 0.54515779 | 0.699529145 | -0.154 |
| cg24568796 | II | 37 | 8  | 99916985  |                   | 0.54 | 0.0014   | 2.85345 | 0.69625281 | 0.850119495 | -0.154 |
| cg03066050 | II | 37 | 9  | 110249749 | KLF4              | 0.5  | 0.00432  | 2.36443 | 0.23956873 | 0.393268569 | -0.154 |
| cg14288424 | II | 37 | 9  | 132429922 | PRRX2             | 0.62 | 0.0001   | 3.98291 | 0.40692633 | 0.560845582 | -0.154 |
| cg21228270 | II | 37 | 9  | 133871033 |                   | 0.67 | 2.34E-05 | 4.63072 | 0.31920605 | 0.473232412 | -0.154 |
| cg14121282 | I  | 37 | 9  | 137268074 | RXRA              | 0.62 | 0.0001   | 3.98291 | 0.2762722  | 0.430322707 | -0.154 |
| cg24480146 | II | 37 | 10 | 43430536  |                   | 0.67 | 2.34E-05 | 4.63072 | 0.67419729 | 0.828605314 | -0.154 |
| cg22679940 | II | 37 | 10 | 71097650  | HK1;HK1;HK1;HK1;I | 0.58 | 0.00041  | 3.39184 | 0.45576197 | 0.609802649 | -0.154 |
| cg19262315 | II | 37 | 11 | 67325980  |                   | 0.42 | 0.02991  | 1.52413 | 0.81223026 | 0.658131706 | 0.154  |
| cg04356090 | I  | 37 | 12 | 129280133 | SLC15A4           | 0.42 | 0.02991  | 1.52413 | 0.85038782 | 0.696556528 | 0.154  |
| cg09660810 | II | 37 | 12 | 132270673 | SFRS8             | 0.58 | 0.00041  | 3.39184 | 0.56622355 | 0.720110149 | -0.154 |

|            |    |    |    |           |                     |      |          |         |            |             |        |
|------------|----|----|----|-----------|---------------------|------|----------|---------|------------|-------------|--------|
| cg11381282 | I  | 37 | 13 | 20763366  | GJB2                | 0.46 | 0.01197  | 1.92207 | 0.5936857  | 0.748060063 | -0.154 |
| cg11288831 | II | 37 | 13 | 114880831 | RASA3               | 0.42 | 0.02991  | 1.52413 | 0.37649306 | 0.53077866  | -0.154 |
| cg02078710 | II | 37 | 14 | 59066094  |                     | 0.5  | 0.00432  | 2.36443 | 0.69714113 | 0.543563139 | 0.154  |
| cg06634140 | II | 37 | 14 | 95956325  |                     | 0.46 | 0.01197  | 1.92207 | 0.69635409 | 0.850395032 | -0.154 |
| cg26146569 | II | 37 | 15 | 31637592  | KLF13               | 0.5  | 0.00432  | 2.36443 | 0.64533984 | 0.491810639 | 0.154  |
| cg00154119 | II | 37 | 15 | 68174054  |                     | 0.54 | 0.0014   | 2.85345 | 0.54802192 | 0.702208417 | -0.154 |
| cg09782560 | II | 37 | 15 | 92058845  |                     | 0.46 | 0.01197  | 1.92207 | 0.27808454 | 0.432316297 | -0.154 |
| cg02074956 | I  | 37 | 16 | 4730657   | MGRN1;MGRN1;M       | 0.46 | 0.01197  | 1.92207 | 0.65031261 | 0.804278166 | -0.154 |
| cg03699843 | II | 37 | 16 | 50701064  | SNX20;SNX20         | 0.46 | 0.01197  | 1.92207 | 0.31323496 | 0.467569663 | -0.154 |
| cg07508446 | II | 37 | 16 | 85966197  |                     | 0.46 | 0.01197  | 1.92207 | 0.66307686 | 0.509443019 | 0.154  |
| cg23792308 | II | 37 | 17 | 14104659  | COX10               | 0.42 | 0.02991  | 1.52413 | 0.43284091 | 0.587152464 | -0.154 |
| cg24718015 | II | 37 | 17 | 40489721  | STAT3;STAT3;STAT3   | 0.46 | 0.01197  | 1.92207 | 0.22867322 | 0.382731833 | -0.154 |
| cg08217545 | I  | 37 | 19 | 3388013   | NFIC;NFIC           | 0.67 | 2.34E-05 | 4.63072 | 0.70176466 | 0.856162314 | -0.154 |
| cg18217136 | II | 37 | 20 | 36157651  | BLCAP;BLCAP         | 0.71 | 4.57E-06 | 5.34042 | 0.61130114 | 0.765431147 | -0.154 |
| cg06850285 | II | 37 | 22 | 21921269  | UBE2L3;UBE2L3;UB    | 0.5  | 0.00432  | 2.36443 | 0.18513288 | 0.339456334 | -0.154 |
| cg15685223 | II | 37 | 22 | 25084556  |                     | 0.54 | 0.0014   | 2.85345 | 0.82791064 | 0.67350717  | 0.154  |
| cg20026613 | I  | 37 | 22 | 45609419  | C22orf9;C22orf9     | 0.62 | 0.0001   | 3.98291 | 0.47455033 | 0.628501415 | -0.154 |
| cg27430637 | II | 37 | 1  | 26646801  | CD52                | 0.62 | 0.0001   | 3.98291 | 0.49708626 | 0.343921837 | 0.153  |
| cg09502149 | II | 37 | 1  | 43406792  | SLC2A1              | 0.62 | 0.0001   | 3.98291 | 0.4587432  | 0.611956082 | -0.153 |
| cg10505902 | I  | 37 | 1  | 144892111 | PDE4DIP;PDE4DIP;f   | 0.58 | 0.00041  | 3.39184 | 0.73639316 | 0.889582328 | -0.153 |
| cg00791854 | II | 37 | 1  | 154392070 | IL6R;IL6R           | 0.5  | 0.00432  | 2.36443 | 0.30676141 | 0.460067488 | -0.153 |
| cg21824010 | II | 37 | 1  | 247578859 | NLRP3;NLRP3         | 0.54 | 0.0014   | 2.85345 | 0.43095007 | 0.583533057 | -0.153 |
| cg06202737 | I  | 37 | 2  | 128166279 |                     | 0.5  | 0.00432  | 2.36443 | 0.51042623 | 0.663824555 | -0.153 |
| cg05795849 | II | 37 | 3  | 4794082   | ITPR1;ITPR1;ITPR1;I | 0.46 | 0.01197  | 1.92207 | 0.20921488 | 0.362433853 | -0.153 |
| cg13035046 | II | 37 | 3  | 13115843  | IQSEC1              | 0.58 | 0.00041  | 3.39184 | 0.54141238 | 0.69455844  | -0.153 |
| cg06806891 | II | 37 | 3  | 128323079 |                     | 0.62 | 0.0001   | 3.98291 | 0.52400194 | 0.67743345  | -0.153 |
| cg02499139 | II | 37 | 3  | 171146337 | TNIK;TNIK;TNIK;TNI  | 0.46 | 0.01197  | 1.92207 | 0.16965454 | 0.323027478 | -0.153 |
| cg14480507 | II | 37 | 4  | 6021538   |                     | 0.58 | 0.00041  | 3.39184 | 0.36244275 | 0.515451648 | -0.153 |
| cg20682563 | II | 37 | 5  | 133460874 | TCF7;TCF7;TCF7;TC   | 0.54 | 0.0014   | 2.85345 | 0.55819635 | 0.404943835 | 0.153  |
| cg25944717 | II | 37 | 5  | 180648843 | TRIM41;TRIM41       | 0.42 | 0.02991  | 1.52413 | 0.73286474 | 0.580323134 | 0.153  |
| cg02029843 | II | 37 | 6  | 11278005  | NEDD9               | 0.5  | 0.00432  | 2.36443 | 0.83008788 | 0.676907422 | 0.153  |
| cg19400926 | II | 37 | 6  | 28889996  | TRIM27              | 0.42 | 0.02991  | 1.52413 | 0.34026097 | 0.493128448 | -0.153 |
| cg17043247 | II | 37 | 6  | 33083989  | HLA-DPB2            | 0.58 | 0.00041  | 3.39184 | 0.55901696 | 0.711770572 | -0.153 |

|            |    |    |    |           |                   |      |          |         |            |             |        |
|------------|----|----|----|-----------|-------------------|------|----------|---------|------------|-------------|--------|
| cg01719223 | II | 37 | 7  | 2205727   | MAD1L1;MAD1L1;M   | 0.5  | 0.00432  | 2.36443 | 0.48920862 | 0.336517479 | 0.153  |
| cg22439641 | II | 37 | 7  | 142045212 |                   | 0.5  | 0.00432  | 2.36443 | 0.59433728 | 0.441659303 | 0.153  |
| cg07632771 | II | 37 | 7  | 148611823 |                   | 0.46 | 0.01197  | 1.92207 | 0.70621541 | 0.553165458 | 0.153  |
| cg19223782 | I  | 37 | 11 | 503807    | RNH1;RNH1;RNH1;   | 0.54 | 0.0014   | 2.85345 | 0.53923363 | 0.692366227 | -0.153 |
| cg26438284 | I  | 37 | 11 | 2406307   | CD81              | 0.5  | 0.00432  | 2.36443 | 0.56242196 | 0.409211652 | 0.153  |
| cg14449910 | II | 37 | 11 | 2919689   | SLC22A18AS;SLC22. | 0.46 | 0.01197  | 1.92207 | 0.48458799 | 0.637100051 | -0.153 |
| cg01425746 | II | 37 | 11 | 45671369  | CHST1             | 0.54 | 0.0014   | 2.85345 | 0.63375446 | 0.787004347 | -0.153 |
| cg06928797 | II | 37 | 11 | 116966699 | SIK3              | 0.62 | 0.0001   | 3.98291 | 0.18628533 | 0.339688684 | -0.153 |
| cg23128949 | I  | 37 | 12 | 124986124 | NCOR2;NCOR2       | 0.5  | 0.00432  | 2.36443 | 0.30007633 | 0.453161814 | -0.153 |
| cg21253130 | II | 37 | 13 | 32609104  | FRY               | 0.5  | 0.00432  | 2.36443 | 0.66576624 | 0.818629107 | -0.153 |
| cg10843707 | II | 37 | 14 | 52510701  | NID2              | 0.42 | 0.02991  | 1.52413 | 0.73829464 | 0.58558384  | 0.153  |
| cg23369670 | II | 37 | 14 | 104171944 | XRCC3;XRCC3;XRCC  | 0.54 | 0.0014   | 2.85345 | 0.47094992 | 0.624227964 | -0.153 |
| cg05059480 | II | 37 | 15 | 40633202  | C15orf52          | 0.54 | 0.0014   | 2.85345 | 0.41942814 | 0.572059958 | -0.153 |
| cg25875049 | II | 37 | 15 | 43531947  | TGM5;TGM5         | 0.58 | 0.00041  | 3.39184 | 0.3065998  | 0.459809493 | -0.153 |
| cg25290178 | I  | 37 | 15 | 93591806  | RGMA;RGMA;RGM.    | 0.58 | 0.00041  | 3.39184 | 0.62065158 | 0.773611583 | -0.153 |
| cg27326750 | II | 37 | 16 | 11367302  | PRM3              | 0.71 | 4.57E-06 | 5.34042 | 0.57061483 | 0.723940082 | -0.153 |
| cg07625774 | I  | 37 | 16 | 89036057  | CBFA2T3           | 0.62 | 0.0001   | 3.98291 | 0.81418462 | 0.660951899 | 0.153  |
| cg09695851 | I  | 37 | 17 | 3907499   |                   | 0.62 | 0.0001   | 3.98291 | 0.7187722  | 0.871376409 | -0.153 |
| cg14089110 | II | 37 | 17 | 7018627   | ASGR2;ASGR2;ASGI  | 0.58 | 0.00041  | 3.39184 | 0.28705686 | 0.440420524 | -0.153 |
| cg14039779 | II | 37 | 17 | 41857714  | DUSP3;C17orf105   | 0.5  | 0.00432  | 2.36443 | 0.4826048  | 0.635940561 | -0.153 |
| cg12840847 | II | 37 | 17 | 75208309  | SEC14L1;SEC14L1;S | 0.5  | 0.00432  | 2.36443 | 0.81433265 | 0.661132897 | 0.153  |
| cg09930046 | II | 37 | 19 | 840737    | PRTN3             | 0.62 | 0.0001   | 3.98291 | 0.38737707 | 0.540639484 | -0.153 |
| cg07239938 | II | 37 | 19 | 852813    | ELANE             | 0.58 | 0.00041  | 3.39184 | 0.38806938 | 0.5411954   | -0.153 |
| cg02319986 | II | 37 | 19 | 8568712   | PRAM1             | 0.5  | 0.00432  | 2.36443 | 0.62202181 | 0.775076136 | -0.153 |
| cg01279933 | II | 37 | 19 | 10663970  | ATG4D;KRI1        | 0.5  | 0.00432  | 2.36443 | 0.41210117 | 0.258882311 | 0.153  |
| cg06579354 | II | 37 | 19 | 41618922  | CYP2F1            | 0.54 | 0.0014   | 2.85345 | 0.69260708 | 0.539658136 | 0.153  |
| cg08425610 | II | 37 | 19 | 46029456  | VASP              | 0.67 | 2.34E-05 | 4.63072 | 0.54468435 | 0.697318424 | -0.153 |
| cg11399589 | II | 37 | 20 | 36147549  | BLCAP;BLCAP;BLCA  | 0.58 | 0.00041  | 3.39184 | 0.67594411 | 0.829251806 | -0.153 |
| cg27585822 | II | 37 | 20 | 49253552  | FAM65C            | 0.75 | 7.61E-07 | 6.11857 | 0.44021571 | 0.593395772 | -0.153 |
| cg07912723 | II | 37 | 1  | 2032058   | PRKCZ;PRKCZ       | 0.54 | 0.0014   | 2.85345 | 0.7261725  | 0.574264628 | 0.152  |
| cg11717881 | II | 37 | 1  | 44513921  |                   | 0.71 | 4.57E-06 | 5.34042 | 0.21514467 | 0.367305963 | -0.152 |
| cg06946837 | I  | 37 | 1  | 53972003  | GLIS1             | 0.5  | 0.00432  | 2.36443 | 0.57834444 | 0.730223173 | -0.152 |
| cg24897320 | II | 37 | 1  | 110042528 | CYB561D1;CYB561I  | 0.62 | 0.0001   | 3.98291 | 0.65340893 | 0.805873642 | -0.152 |

|            |    |    |    |           |                    |      |          |         |            |             |        |
|------------|----|----|----|-----------|--------------------|------|----------|---------|------------|-------------|--------|
| cg10528484 | II | 37 | 1  | 204265410 | PLEKHA6            | 0.46 | 0.01197  | 1.92207 | 0.4646427  | 0.616258539 | -0.152 |
| cg10809134 | II | 37 | 2  | 47879734  |                    | 0.46 | 0.01197  | 1.92207 | 0.73890438 | 0.587011126 | 0.152  |
| cg19867579 | II | 37 | 2  | 175643491 |                    | 0.62 | 0.0001   | 3.98291 | 0.51446681 | 0.66623142  | -0.152 |
| cg00458932 | II | 37 | 2  | 208199465 |                    | 0.58 | 0.00041  | 3.39184 | 0.70253526 | 0.550782503 | 0.152  |
| cg20296298 | II | 37 | 2  | 210074020 |                    | 0.42 | 0.02991  | 1.52413 | 0.85330362 | 0.701316447 | 0.152  |
| cg20793665 | I  | 37 | 2  | 232549224 |                    | 0.58 | 0.00041  | 3.39184 | 0.62558103 | 0.473567557 | 0.152  |
| cg15072976 | I  | 37 | 2  | 242715549 | GAL3ST2            | 0.54 | 0.0014   | 2.85345 | 0.67237822 | 0.823901283 | -0.152 |
| cg11600734 | II | 37 | 3  | 4794020   | ITPR1;ITPR1;ITPR1; | 0.54 | 0.0014   | 2.85345 | 0.3139527  | 0.466110742 | -0.152 |
| cg00907288 | I  | 37 | 3  | 9178249   | SRGAP3;SRGAP3      | 0.58 | 0.00041  | 3.39184 | 0.14839518 | 0.300580447 | -0.152 |
| cg04475307 | II | 37 | 3  | 9694905   | MTMR14;MTMR14      | 0.58 | 0.00041  | 3.39184 | 0.78102516 | 0.628742287 | 0.152  |
| cg24052964 | II | 37 | 5  | 142226498 | ARHGAP26;ARHGAP    | 0.46 | 0.01197  | 1.92207 | 0.64974907 | 0.80156299  | -0.152 |
| cg06654628 | II | 37 | 5  | 150018914 | SYNPO;SYNPO;SYNI   | 0.54 | 0.0014   | 2.85345 | 0.30921875 | 0.461111045 | -0.152 |
| cg15601361 | II | 37 | 6  | 11771493  | C6orf105;C6orf105  | 0.54 | 0.0014   | 2.85345 | 0.62748026 | 0.779272764 | -0.152 |
| cg12044213 | II | 37 | 6  | 31124978  | CCHCR1;TCF19;CCH   | 0.54 | 0.0014   | 2.85345 | 0.3569318  | 0.508436163 | -0.152 |
| cg09637172 | I  | 37 | 6  | 31545252  | TNF                | 0.46 | 0.01197  | 1.92207 | 0.81379728 | 0.661711175 | 0.152  |
| cg12048225 | II | 37 | 6  | 32808669  | PSMB8;PSMB8        | 0.5  | 0.00432  | 2.36443 | 0.29755339 | 0.145665354 | 0.152  |
| cg18818075 | II | 37 | 6  | 44528865  |                    | 0.67 | 2.34E-05 | 4.63072 | 0.37150409 | 0.523363093 | -0.152 |
| cg23045991 | II | 37 | 7  | 101943005 | SH2B2              | 0.5  | 0.00432  | 2.36443 | 0.32723068 | 0.479145582 | -0.152 |
| cg13726789 | II | 37 | 8  | 37678323  | GPR124             | 0.67 | 2.34E-05 | 4.63072 | 0.5785923  | 0.730162517 | -0.152 |
| cg00799984 | II | 37 | 8  | 134307105 | NDRG1;NDRG1        | 0.54 | 0.0014   | 2.85345 | 0.67399116 | 0.825628493 | -0.152 |
| cg14151976 | II | 37 | 9  | 37565559  | FBXO10             | 0.5  | 0.00432  | 2.36443 | 0.81626063 | 0.664037728 | 0.152  |
| cg02127980 | II | 37 | 9  | 137252116 | RXRA               | 0.62 | 0.0001   | 3.98291 | 0.32593645 | 0.47770817  | -0.152 |
| cg07676145 | II | 37 | 10 | 73506646  | CDH23              | 0.58 | 0.00041  | 3.39184 | 0.37043866 | 0.522431439 | -0.152 |
| cg15092239 | I  | 37 | 10 | 129678749 | CLRN3              | 0.54 | 0.0014   | 2.85345 | 0.46272764 | 0.614943147 | -0.152 |
| cg06061966 | II | 37 | 11 | 46366643  | DGKZ;DGKZ          | 0.67 | 2.34E-05 | 4.63072 | 0.43812683 | 0.590340588 | -0.152 |
| cg07104417 | I  | 37 | 11 | 69259247  |                    | 0.58 | 0.00041  | 3.39184 | 0.78624787 | 0.938313672 | -0.152 |
| cg18567954 | I  | 37 | 12 | 113496168 | DTX1               | 0.5  | 0.00432  | 2.36443 | 0.69457467 | 0.542098263 | 0.152  |
| cg04706229 | II | 37 | 14 | 50550589  | C14orf183          | 0.5  | 0.00432  | 2.36443 | 0.8240122  | 0.672238131 | 0.152  |
| cg02057747 | II | 37 | 14 | 69408849  | ACTN1;ACTN1;ACTI   | 0.58 | 0.00041  | 3.39184 | 0.38942592 | 0.541276744 | -0.152 |
| cg10070185 | I  | 37 | 14 | 94857151  | SERPINA1;SERPINA   | 0.5  | 0.00432  | 2.36443 | 0.55353498 | 0.705233353 | -0.152 |
| cg13496568 | II | 37 | 14 | 103374508 |                    | 0.5  | 0.00432  | 2.36443 | 0.82526216 | 0.673297948 | 0.152  |
| cg25290779 | II | 37 | 15 | 63886947  |                    | 0.62 | 0.0001   | 3.98291 | 0.75854189 | 0.606149785 | 0.152  |
| cg25607876 | II | 37 | 15 | 93580312  |                    | 0.54 | 0.0014   | 2.85345 | 0.63074526 | 0.78248518  | -0.152 |

|            |    |    |    |           |                    |      |          |         |            |             |        |
|------------|----|----|----|-----------|--------------------|------|----------|---------|------------|-------------|--------|
| cg04787728 | II | 37 | 16 | 3598600   | NLRC3              | 0.46 | 0.01197  | 1.92207 | 0.4503097  | 0.298049483 | 0.152  |
| cg03726236 | I  | 37 | 16 | 28935666  | RABEP2             | 0.58 | 0.00041  | 3.39184 | 0.41906131 | 0.267237202 | 0.152  |
| cg16583186 | I  | 37 | 16 | 81526361  | CMIP               | 0.5  | 0.00432  | 2.36443 | 0.52576223 | 0.677569458 | -0.152 |
| cg26603047 | I  | 37 | 16 | 88838368  | FAM38A             | 0.54 | 0.0014   | 2.85345 | 0.61880804 | 0.467006838 | 0.152  |
| cg27102649 | I  | 37 | 17 | 1665172   | SERPINF1           | 0.54 | 0.0014   | 2.85345 | 0.72370018 | 0.876073962 | -0.152 |
| cg20765716 | I  | 37 | 17 | 3704602   | ITGAE              | 0.54 | 0.0014   | 2.85345 | 0.73642874 | 0.888924135 | -0.152 |
| cg22640868 | II | 37 | 17 | 26661374  | TNFAIP1;IFT20      | 0.58 | 0.00041  | 3.39184 | 0.20577663 | 0.35752732  | -0.152 |
| cg24223942 | II | 37 | 17 | 29152934  | CRLF3              | 0.46 | 0.01197  | 1.92207 | 0.51666509 | 0.668724048 | -0.152 |
| cg04967578 | II | 37 | 18 | 13641894  | C18orf1;C18orf1;C1 | 0.58 | 0.00041  | 3.39184 | 0.43658427 | 0.588759828 | -0.152 |
| cg16387467 | II | 37 | 18 | 72166016  | CNDP2;CNDP2        | 0.46 | 0.01197  | 1.92207 | 0.28345088 | 0.435787465 | -0.152 |
| cg03502002 | I  | 37 | 18 | 74962133  | GALR1;GALR1        | 0.46 | 0.01197  | 1.92207 | 0.07849968 | 0.23002668  | -0.152 |
| cg17173442 | I  | 37 | 19 | 19305340  | RFXANK;RFXANK      | 0.5  | 0.00432  | 2.36443 | 0.52597601 | 0.677518652 | -0.152 |
| cg17618872 | II | 37 | 20 | 32235621  | CBFA2T2;CBFA2T2;   | 0.62 | 0.0001   | 3.98291 | 0.79273076 | 0.64059629  | 0.152  |
| cg01332882 | I  | 37 | 20 | 47874155  | ZNFX1              | 0.54 | 0.0014   | 2.85345 | 0.74897953 | 0.90059534  | -0.152 |
| cg01557221 | II | 37 | 22 | 36558091  | APOL3;APOL3;APOI   | 0.58 | 0.00041  | 3.39184 | 0.77026178 | 0.617817944 | 0.152  |
| cg03834031 | II | 37 | 22 | 46465717  |                    | 0.5  | 0.00432  | 2.36443 | 0.13740915 | 0.289143951 | -0.152 |
| cg00300303 | II | 37 | 1  | 1067223   |                    | 0.5  | 0.00432  | 2.36443 | 0.62335529 | 0.774244123 | -0.151 |
| cg05957749 | II | 37 | 1  | 39875787  | KIAA0754;KIAA0754  | 0.58 | 0.00041  | 3.39184 | 0.56492341 | 0.716385866 | -0.151 |
| cg07313701 | II | 37 | 1  | 42447165  |                    | 0.5  | 0.00432  | 2.36443 | 0.26260808 | 0.413939611 | -0.151 |
| cg15562346 | I  | 37 | 2  | 239403295 |                    | 0.5  | 0.00432  | 2.36443 | 0.82377401 | 0.672760872 | 0.151  |
| cg11550064 | II | 37 | 2  | 240148191 | HDAC4              | 0.54 | 0.0014   | 2.85345 | 0.68143945 | 0.83224143  | -0.151 |
| cg03610527 | I  | 37 | 2  | 242174889 | HDLBP;HDLBP        | 0.54 | 0.0014   | 2.85345 | 0.773192   | 0.924190357 | -0.151 |
| cg25234117 | II | 37 | 3  | 155423168 | PLCH1              | 0.46 | 0.01197  | 1.92207 | 0.44438354 | 0.595820519 | -0.151 |
| cg04431508 | II | 37 | 3  | 171693162 |                    | 0.54 | 0.0014   | 2.85345 | 0.50084131 | 0.651886665 | -0.151 |
| cg22831526 | II | 37 | 3  | 194706168 |                    | 0.62 | 0.0001   | 3.98291 | 0.35069568 | 0.501458025 | -0.151 |
| cg09249657 | II | 37 | 4  | 40518806  | RBM47;RBM47        | 0.58 | 0.00041  | 3.39184 | 0.58851167 | 0.437755639 | 0.151  |
| cg26646659 | II | 37 | 5  | 55776364  |                    | 0.54 | 0.0014   | 2.85345 | 0.57325168 | 0.422575957 | 0.151  |
| cg19008097 | II | 37 | 5  | 140012986 | CD14;CD14;CD14     | 0.67 | 2.34E-05 | 4.63072 | 0.36907247 | 0.520408311 | -0.151 |
| cg25613180 | II | 37 | 5  | 149513303 | PDGFRB             | 0.5  | 0.00432  | 2.36443 | 0.56527319 | 0.715914996 | -0.151 |
| cg15382302 | II | 37 | 6  | 3848866   | FAM50B             | 0.58 | 0.00041  | 3.39184 | 0.6557723  | 0.806587977 | -0.151 |
| cg25637655 | I  | 37 | 6  | 29911542  | HLA-A              | 0.5  | 0.00432  | 2.36443 | 0.50612217 | 0.35490792  | 0.151  |
| cg23204396 | II | 37 | 6  | 31548107  |                    | 0.54 | 0.0014   | 2.85345 | 0.64279323 | 0.491332065 | 0.151  |
| cg01300096 | II | 37 | 6  | 33384490  | CUTA;CUTA;CUTA;C   | 0.58 | 0.00041  | 3.39184 | 0.64413774 | 0.493313217 | 0.151  |

|            |    |    |    |           |                   |      |          |         |            |             |        |
|------------|----|----|----|-----------|-------------------|------|----------|---------|------------|-------------|--------|
| cg12070911 | II | 37 | 6  | 150209640 | RAET1E            | 0.46 | 0.01197  | 1.92207 | 0.69258306 | 0.541298966 | 0.151  |
| cg20867674 | II | 37 | 6  | 163768411 |                   | 0.58 | 0.00041  | 3.39184 | 0.67138726 | 0.822803379 | -0.151 |
| cg04450052 | II | 37 | 6  | 170525426 |                   | 0.42 | 0.02991  | 1.52413 | 0.5976332  | 0.44652284  | 0.151  |
| cg16492851 | II | 37 | 7  | 1062681   | C7orf50;MIR339;C7 | 0.46 | 0.01197  | 1.92207 | 0.57676781 | 0.425954041 | 0.151  |
| cg16495448 | II | 37 | 7  | 3019260   | CARD11            | 0.46 | 0.01197  | 1.92207 | 0.376356   | 0.224864616 | 0.151  |
| cg27342333 | II | 37 | 7  | 75592418  | POR               | 0.58 | 0.00041  | 3.39184 | 0.36459483 | 0.515500393 | -0.151 |
| cg06959773 | II | 37 | 7  | 76033795  | SRCRB4D;ZP3       | 0.67 | 2.34E-05 | 4.63072 | 0.67896919 | 0.830298359 | -0.151 |
| cg25823085 | I  | 37 | 7  | 87105416  | ABCB4;ABCB4;ABCF  | 0.58 | 0.00041  | 3.39184 | 0.53944981 | 0.388489787 | 0.151  |
| cg12797746 | I  | 37 | 8  | 1110520   |                   | 0.58 | 0.00041  | 3.39184 | 0.72903669 | 0.578060797 | 0.151  |
| cg22062741 | II | 37 | 8  | 1897075   | ARHGEF10          | 0.54 | 0.0014   | 2.85345 | 0.70193096 | 0.853340105 | -0.151 |
| cg14918744 | II | 37 | 8  | 23018464  | TNFRSF10D         | 0.5  | 0.00432  | 2.36443 | 0.76292477 | 0.611627917 | 0.151  |
| cg00053916 | II | 37 | 8  | 37457329  |                   | 0.62 | 0.0001   | 3.98291 | 0.6900732  | 0.840720516 | -0.151 |
| cg27040700 | II | 37 | 8  | 91017761  | DECR1             | 0.42 | 0.02991  | 1.52413 | 0.29187926 | 0.442646961 | -0.151 |
| cg20173011 | II | 37 | 8  | 101507705 |                   | 0.58 | 0.00041  | 3.39184 | 0.26925638 | 0.117969966 | 0.151  |
| cg09723776 | II | 37 | 8  | 126320143 | NSMCE2            | 0.5  | 0.00432  | 2.36443 | 0.73631411 | 0.887017845 | -0.151 |
| cg13569051 | II | 37 | 9  | 124051703 | GSN;GSN;GSN;GSN;  | 0.58 | 0.00041  | 3.39184 | 0.54236705 | 0.693740381 | -0.151 |
| cg21234265 | II | 37 | 9  | 132370351 |                   | 0.54 | 0.0014   | 2.85345 | 0.35417951 | 0.504989307 | -0.151 |
| cg13655250 | II | 37 | 9  | 134544528 | RAPGEF1;RAPGEF1   | 0.54 | 0.0014   | 2.85345 | 0.28483264 | 0.133523795 | 0.151  |
| cg14108380 | I  | 37 | 9  | 139299357 | SDCCAG3;SDCCAG3   | 0.46 | 0.01197  | 1.92207 | 0.88682577 | 0.735509276 | 0.151  |
| cg26555531 | II | 37 | 10 | 1507708   | ADARB2            | 0.5  | 0.00432  | 2.36443 | 0.71183495 | 0.561239253 | 0.151  |
| cg14038949 | II | 37 | 10 | 6262673   | PFKFB3;PFKFB3     | 0.42 | 0.02991  | 1.52413 | 0.48878775 | 0.337854788 | 0.151  |
| cg21607649 | II | 37 | 10 | 134884177 |                   | 0.62 | 0.0001   | 3.98291 | 0.57972379 | 0.429050076 | 0.151  |
| cg18101140 | II | 37 | 11 | 67142001  | LOC100130987;CLC  | 0.54 | 0.0014   | 2.85345 | 0.27200788 | 0.422918937 | -0.151 |
| cg10346364 | II | 37 | 11 | 67142268  | LOC100130987;CLC  | 0.58 | 0.00041  | 3.39184 | 0.37021834 | 0.52075801  | -0.151 |
| cg02845204 | II | 37 | 11 | 71259439  | KRTAP5-9          | 0.54 | 0.0014   | 2.85345 | 0.37460306 | 0.525186961 | -0.151 |
| cg25221207 | II | 37 | 11 | 119555633 | PVRL1;PVRL1;PVRL1 | 0.54 | 0.0014   | 2.85345 | 0.23559251 | 0.386193065 | -0.151 |
| cg06715628 | II | 37 | 12 | 52482292  |                   | 0.54 | 0.0014   | 2.85345 | 0.42148973 | 0.270681691 | 0.151  |
| cg03690812 | II | 37 | 12 | 111875483 | SH2B3             | 0.67 | 2.34E-05 | 4.63072 | 0.6108312  | 0.762178012 | -0.151 |
| cg27431877 | II | 37 | 12 | 124911924 | NCOR2;NCOR2       | 0.54 | 0.0014   | 2.85345 | 0.66932022 | 0.820167752 | -0.151 |
| cg06777732 | I  | 37 | 12 | 131118426 |                   | 0.42 | 0.02991  | 1.52413 | 0.25868778 | 0.107410408 | 0.151  |
| cg00465247 | II | 37 | 13 | 50703477  |                   | 0.5  | 0.00432  | 2.36443 | 0.6424147  | 0.491077166 | 0.151  |
| cg15839421 | II | 37 | 17 | 1636454   | WDR81;WDR81;WI    | 0.5  | 0.00432  | 2.36443 | 0.36903307 | 0.218247203 | 0.151  |
| cg07323451 | II | 37 | 17 | 3635580   | ITGAE             | 0.42 | 0.02991  | 1.52413 | 0.49275206 | 0.341694613 | 0.151  |

|            |    |    |    |           |                  |      |          |         |            |             |        |
|------------|----|----|----|-----------|------------------|------|----------|---------|------------|-------------|--------|
| cg14394837 | II | 37 | 17 | 25802282  | KSR1             | 0.5  | 0.00432  | 2.36443 | 0.69759733 | 0.546617039 | 0.151  |
| cg08681966 | II | 37 | 17 | 29054723  |                  | 0.67 | 2.34E-05 | 4.63072 | 0.39501903 | 0.545860867 | -0.151 |
| cg05655281 | I  | 37 | 18 | 76322900  |                  | 0.5  | 0.00432  | 2.36443 | 0.65010685 | 0.801126948 | -0.151 |
| cg23690893 | I  | 37 | 19 | 14671371  | TECR             | 0.54 | 0.0014   | 2.85345 | 0.42882704 | 0.579767079 | -0.151 |
| cg19010566 | II | 37 | 20 | 23062796  | CD93             | 0.46 | 0.01197  | 1.92207 | 0.57033031 | 0.72146121  | -0.151 |
| cg13374901 | II | 37 | 20 | 60639404  | TAF4             | 0.58 | 0.00041  | 3.39184 | 0.50367548 | 0.654244472 | -0.151 |
| cg21213332 | II | 37 | 21 | 45345433  | AGPAT3;AGPAT3    | 0.54 | 0.0014   | 2.85345 | 0.54833184 | 0.698972612 | -0.151 |
| cg10107292 | II | 37 | 1  | 15504438  | TMEM51;TMEM51;   | 0.58 | 0.00041  | 3.39184 | 0.20533372 | 0.355789157 | -0.15  |
| cg20812722 | II | 37 | 1  | 25525951  |                  | 0.46 | 0.01197  | 1.92207 | 0.60572112 | 0.455508343 | 0.15   |
| cg06659338 | II | 37 | 1  | 54562040  | C1orf83          | 0.71 | 4.57E-06 | 5.34042 | 0.39769328 | 0.54798756  | -0.15  |
| cg27058077 | I  | 37 | 1  | 200337470 |                  | 0.46 | 0.01197  | 1.92207 | 0.24073589 | 0.391204203 | -0.15  |
| cg27386431 | I  | 37 | 1  | 200990482 | KIF21B           | 0.58 | 0.00041  | 3.39184 | 0.57362769 | 0.423663213 | 0.15   |
| cg09264489 | II | 37 | 1  | 204257406 | PLEKHA6          | 0.58 | 0.00041  | 3.39184 | 0.65829915 | 0.808379496 | -0.15  |
| cg23228450 | II | 37 | 1  | 205618102 |                  | 0.62 | 0.0001   | 3.98291 | 0.60089718 | 0.450874253 | 0.15   |
| cg06093152 | II | 37 | 1  | 212662017 |                  | 0.5  | 0.00432  | 2.36443 | 0.56878514 | 0.718993818 | -0.15  |
| cg04694619 | II | 37 | 2  | 242127759 | ANO7;ANO7        | 0.54 | 0.0014   | 2.85345 | 0.72643339 | 0.57674602  | 0.15   |
| cg26062204 | II | 37 | 3  | 150661892 | CLRN1;CLRN1;CLRN | 0.54 | 0.0014   | 2.85345 | 0.80389383 | 0.654357044 | 0.15   |
| cg07277038 | II | 37 | 3  | 196373543 | LRRC33           | 0.5  | 0.00432  | 2.36443 | 0.58354317 | 0.73399547  | -0.15  |
| cg17055207 | II | 37 | 4  | 8412736   | ACOX3;ACOX3      | 0.46 | 0.01197  | 1.92207 | 0.78426731 | 0.63416034  | 0.15   |
| cg16234490 | II | 37 | 4  | 77138082  |                  | 0.58 | 0.00041  | 3.39184 | 0.6023845  | 0.751995076 | -0.15  |
| cg05017994 | I  | 37 | 5  | 964562    |                  | 0.46 | 0.01197  | 1.92207 | 0.65831079 | 0.507829018 | 0.15   |
| cg11095383 | I  | 37 | 5  | 140174887 | PCDHA1;PCDHA1;P  | 0.46 | 0.01197  | 1.92207 | 0.28228516 | 0.432686117 | -0.15  |
| cg02214623 | II | 37 | 5  | 180671896 | GNB2L1           | 0.46 | 0.01197  | 1.92207 | 0.45280773 | 0.602370956 | -0.15  |
| cg17709873 | II | 37 | 6  | 31540456  | LTA;LTA          | 0.5  | 0.00432  | 2.36443 | 0.52820829 | 0.378127554 | 0.15   |
| cg14997321 | II | 37 | 6  | 134436460 |                  | 0.58 | 0.00041  | 3.39184 | 0.54672927 | 0.69642529  | -0.15  |
| cg03125341 | II | 37 | 6  | 157882207 | ZDHHC14;ZDHHC14  | 0.54 | 0.0014   | 2.85345 | 0.26883303 | 0.11856234  | 0.15   |
| cg18998543 | II | 37 | 7  | 2769865   | GNA12            | 0.54 | 0.0014   | 2.85345 | 0.30722616 | 0.457703819 | -0.15  |
| cg16329896 | II | 37 | 7  | 47515060  | TNS3             | 0.46 | 0.01197  | 1.92207 | 0.30358787 | 0.45312267  | -0.15  |
| cg25345520 | II | 37 | 7  | 116210196 |                  | 0.5  | 0.00432  | 2.36443 | 0.68440784 | 0.534691447 | 0.15   |
| cg18739367 | II | 37 | 8  | 38330740  |                  | 0.58 | 0.00041  | 3.39184 | 0.40629806 | 0.555939521 | -0.15  |
| cg14184780 | I  | 37 | 9  | 95475751  | BICD2;BICD2      | 0.5  | 0.00432  | 2.36443 | 0.47604272 | 0.626405237 | -0.15  |
| cg14508093 | I  | 37 | 9  | 98862825  |                  | 0.46 | 0.01197  | 1.92207 | 0.30981544 | 0.45936557  | -0.15  |
| cg09045574 | II | 37 | 10 | 101686925 | DNMBP;NCRNA000   | 0.42 | 0.02991  | 1.52413 | 0.48045182 | 0.630633735 | -0.15  |

|            |    |    |    |           |                  |      |         |         |            |             |       |
|------------|----|----|----|-----------|------------------|------|---------|---------|------------|-------------|-------|
| cg11727383 | I  | 37 | 10 | 102988389 | LBX1;FLJ41350    | 0.46 | 0.01197 | 1.92207 | 0.12629942 | 0.276031729 | -0.15 |
| cg07556018 | II | 37 | 11 | 2677341   | KCNQ1;KCNQ1OT1;  | 0.62 | 0.0001  | 3.98291 | 0.42975751 | 0.580031277 | -0.15 |
| cg22766888 | II | 37 | 11 | 3188566   |                  | 0.58 | 0.00041 | 3.39184 | 0.5788658  | 0.729228439 | -0.15 |
| cg20217257 | II | 37 | 11 | 64109158  | CCDC88B          | 0.54 | 0.0014  | 2.85345 | 0.64203365 | 0.791757864 | -0.15 |
| cg25824218 | II | 37 | 12 | 25104798  |                  | 0.46 | 0.01197 | 1.92207 | 0.7924343  | 0.642266493 | 0.15  |
| cg12669088 | II | 37 | 12 | 25541364  |                  | 0.5  | 0.00432 | 2.36443 | 0.79896011 | 0.649062288 | 0.15  |
| cg09039672 | II | 37 | 12 | 52367989  | ACVR1B;ACVR1B;A  | 0.46 | 0.01197 | 1.92207 | 0.66213249 | 0.81246727  | -0.15 |
| cg16782719 | II | 37 | 12 | 129280334 | SLC15A4          | 0.46 | 0.01197 | 1.92207 | 0.63717795 | 0.486856649 | 0.15  |
| cg23251248 | I  | 37 | 14 | 55907374  | TBPL2            | 0.54 | 0.0014  | 2.85345 | 0.60523273 | 0.755319915 | -0.15 |
| cg24183098 | II | 37 | 14 | 101296297 | MEG3;MEG3;MEG3   | 0.54 | 0.0014  | 2.85345 | 0.74211202 | 0.592199384 | 0.15  |
| cg02256455 | I  | 37 | 14 | 104165475 | XRCC3;XRCC3;XRCC | 0.54 | 0.0014  | 2.85345 | 0.57246016 | 0.422573085 | 0.15  |
| cg19676553 | II | 37 | 14 | 105751629 | BRF1             | 0.5  | 0.00432 | 2.36443 | 0.59563131 | 0.745147116 | -0.15 |
| cg26983304 | II | 37 | 14 | 106044101 |                  | 0.46 | 0.01197 | 1.92207 | 0.39682125 | 0.247001293 | 0.15  |
| cg06926377 | II | 37 | 15 | 40443853  |                  | 0.54 | 0.0014  | 2.85345 | 0.65024193 | 0.800524584 | -0.15 |
| cg13048962 | II | 37 | 15 | 66790410  | SNAPC5           | 0.54 | 0.0014  | 2.85345 | 0.25319626 | 0.402985198 | -0.15 |
| cg01678084 | I  | 37 | 15 | 67022087  | SMAD6;SMAD6;SM   | 0.62 | 0.0001  | 3.98291 | 0.85995484 | 0.709460548 | 0.15  |
| cg02462661 | II | 37 | 15 | 74275622  | STOML1           | 0.5  | 0.00432 | 2.36443 | 0.38567188 | 0.53527607  | -0.15 |
| cg20329220 | II | 37 | 15 | 78286521  | LOC91450         | 0.5  | 0.00432 | 2.36443 | 0.37170878 | 0.222045438 | 0.15  |
| cg05027554 | I  | 37 | 16 | 646579    | RAB40C           | 0.54 | 0.0014  | 2.85345 | 0.72934662 | 0.879181255 | -0.15 |
| cg05765011 | II | 37 | 16 | 4103225   | ADCY9            | 0.58 | 0.00041 | 3.39184 | 0.49494152 | 0.64462857  | -0.15 |
| cg09005651 | I  | 37 | 16 | 4740694   | MGRN1;MGRN1;M    | 0.62 | 0.0001  | 3.98291 | 0.60963972 | 0.759473246 | -0.15 |
| cg26843872 | II | 37 | 16 | 30368792  | TBC1D10B         | 0.54 | 0.0014  | 2.85345 | 0.45048872 | 0.600030777 | -0.15 |
| cg05820066 | II | 37 | 16 | 75145843  | LDHD;LDHD        | 0.54 | 0.0014  | 2.85345 | 0.44974519 | 0.599902817 | -0.15 |
| cg08675364 | II | 37 | 16 | 85362963  |                  | 0.5  | 0.00432 | 2.36443 | 0.49809404 | 0.648348292 | -0.15 |
| cg05166473 | I  | 37 | 16 | 88103629  | BANP;BANP        | 0.54 | 0.0014  | 2.85345 | 0.74076932 | 0.590930555 | 0.15  |
| cg09594635 | I  | 37 | 16 | 89126866  |                  | 0.5  | 0.00432 | 2.36443 | 0.81638618 | 0.666422668 | 0.15  |
| cg05944840 | II | 37 | 16 | 89401621  | ANKRD11          | 0.5  | 0.00432 | 2.36443 | 0.42203611 | 0.572274123 | -0.15 |
| cg09597638 | II | 37 | 17 | 3907349   |                  | 0.58 | 0.00041 | 3.39184 | 0.58144468 | 0.731076436 | -0.15 |
| cg09098720 | II | 37 | 17 | 49412842  |                  | 0.46 | 0.01197 | 1.92207 | 0.70071701 | 0.550722538 | 0.15  |
| cg10723617 | II | 37 | 17 | 55533389  | MSI2;MSI2        | 0.62 | 0.0001  | 3.98291 | 0.60044012 | 0.750437429 | -0.15 |
| cg06418113 | II | 37 | 18 | 43915901  | RNF165           | 0.5  | 0.00432 | 2.36443 | 0.3297913  | 0.480192338 | -0.15 |
| cg03004350 | I  | 37 | 19 | 847943    | PRTN3            | 0.58 | 0.00041 | 3.39184 | 0.52078115 | 0.67088816  | -0.15 |
| cg22761077 | I  | 37 | 19 | 850975    | ELANE            | 0.5  | 0.00432 | 2.36443 | 0.30403448 | 0.454147403 | -0.15 |

|            |    |    |    |           |                   |      |          |         |            |             |        |
|------------|----|----|----|-----------|-------------------|------|----------|---------|------------|-------------|--------|
| cg19357865 | II | 37 | 19 | 13947262  | MIR27A;MIR24-2    | 0.58 | 0.00041  | 3.39184 | 0.41634952 | 0.566723082 | -0.15  |
| cg03214420 | II | 37 | 19 | 44257589  | C19orf61          | 0.46 | 0.01197  | 1.92207 | 0.74532043 | 0.5955027   | 0.15   |
| cg25739142 | II | 37 | 20 | 3206940   |                   | 0.42 | 0.02991  | 1.52413 | 0.75163835 | 0.601818936 | 0.15   |
| cg26482164 | II | 37 | 20 | 58630240  | C20orf197         | 0.42 | 0.02991  | 1.52413 | 0.29655959 | 0.446120715 | -0.15  |
| cg24157349 | II | 37 | 22 | 47081751  | CERK              | 0.46 | 0.01197  | 1.92207 | 0.18781925 | 0.337801598 | -0.15  |
| cg06939447 | I  | 37 | 1  | 3589971   | TP73              | 0.54 | 0.0014   | 2.85345 | 0.74222377 | 0.593485137 | 0.149  |
| cg01208873 | II | 37 | 1  | 15127769  | KIAA1026;KIAA1021 | 0.67 | 2.34E-05 | 4.63072 | 0.57979203 | 0.728653497 | -0.149 |
| cg26554265 | II | 37 | 1  | 23206348  | EPHB2;EPHB2       | 0.58 | 0.00041  | 3.39184 | 0.66730602 | 0.518138641 | 0.149  |
| cg02343604 | II | 37 | 1  | 23884703  | ID3               | 0.62 | 0.0001   | 3.98291 | 0.50893656 | 0.359803269 | 0.149  |
| cg26292918 | II | 37 | 1  | 151826205 | THEM5             | 0.42 | 0.02991  | 1.52413 | 0.59136956 | 0.740737256 | -0.149 |
| cg10232893 | II | 37 | 1  | 230961405 |                   | 0.67 | 2.34E-05 | 4.63072 | 0.61389449 | 0.762497849 | -0.149 |
| cg08031024 | II | 37 | 2  | 121617597 | GLI2              | 0.46 | 0.01197  | 1.92207 | 0.70915464 | 0.559669613 | 0.149  |
| cg17109049 | II | 37 | 2  | 220072753 | ZFAND2B           | 0.54 | 0.0014   | 2.85345 | 0.61786562 | 0.766573073 | -0.149 |
| cg00638210 | II | 37 | 3  | 126732518 | PLXNA1            | 0.5  | 0.00432  | 2.36443 | 0.6278502  | 0.77647326  | -0.149 |
| cg27312961 | II | 37 | 3  | 191048361 | UTS2D;CCDC50;CCI  | 0.5  | 0.00432  | 2.36443 | 0.53511229 | 0.386133242 | 0.149  |
| cg25512381 | II | 37 | 3  | 195342063 |                   | 0.42 | 0.02991  | 1.52413 | 0.65869817 | 0.5094638   | 0.149  |
| cg12811871 | I  | 37 | 4  | 2322078   | ZFYVE28           | 0.42 | 0.02991  | 1.52413 | 0.74903474 | 0.599744411 | 0.149  |
| cg01831454 | II | 37 | 5  | 148417172 | SH3TC2            | 0.62 | 0.0001   | 3.98291 | 0.38295776 | 0.531470272 | -0.149 |
| cg00987918 | II | 37 | 6  | 30115829  | TRIM40            | 0.67 | 2.34E-05 | 4.63072 | 0.66978735 | 0.520381719 | 0.149  |
| cg22752886 | II | 37 | 6  | 30619221  | C6orf136;C6orf136 | 0.54 | 0.0014   | 2.85345 | 0.7492591  | 0.600238621 | 0.149  |
| cg16553272 | II | 37 | 6  | 31847028  | SLC44A4           | 0.42 | 0.02991  | 1.52413 | 0.67007077 | 0.819010469 | -0.149 |
| cg12397463 | II | 37 | 6  | 33128825  |                   | 0.54 | 0.0014   | 2.85345 | 0.53175496 | 0.680508364 | -0.149 |
| cg24035447 | I  | 37 | 6  | 48036613  | C6orf138          | 0.46 | 0.01197  | 1.92207 | 0.13739366 | 0.286206254 | -0.149 |
| cg25028542 | II | 37 | 7  | 36429120  | ANLN;KIAA0895     | 0.5  | 0.00432  | 2.36443 | 0.21659919 | 0.36609299  | -0.149 |
| cg13659700 | II | 37 | 7  | 97832841  | LMTK2             | 0.54 | 0.0014   | 2.85345 | 0.73531125 | 0.586388531 | 0.149  |
| cg01077501 | II | 37 | 7  | 134617592 | CALD1;CALD1;CALC  | 0.5  | 0.00432  | 2.36443 | 0.67579799 | 0.527099582 | 0.149  |
| cg17500680 | II | 37 | 8  | 134039099 | TG                | 0.58 | 0.00041  | 3.39184 | 0.46944827 | 0.618629498 | -0.149 |
| cg25405138 | II | 37 | 10 | 34488427  | PARD3             | 0.46 | 0.01197  | 1.92207 | 0.79982928 | 0.650469857 | 0.149  |
| cg17237804 | II | 37 | 10 | 71199355  |                   | 0.5  | 0.00432  | 2.36443 | 0.6784     | 0.82737554  | -0.149 |
| cg04304802 | II | 37 | 10 | 73499965  | CDH23             | 0.58 | 0.00041  | 3.39184 | 0.2955626  | 0.444360871 | -0.149 |
| cg10552523 | II | 37 | 11 | 313478    | IFITM1            | 0.54 | 0.0014   | 2.85345 | 0.3204293  | 0.171409081 | 0.149  |
| cg23816537 | II | 37 | 11 | 60634869  | ZP1               | 0.46 | 0.01197  | 1.92207 | 0.67455783 | 0.525204106 | 0.149  |
| cg18395636 | I  | 37 | 11 | 87908785  | RAB38             | 0.54 | 0.0014   | 2.85345 | 0.12916087 | 0.277817963 | -0.149 |

|            |    |    |    |           |                   |      |          |         |            |             |        |
|------------|----|----|----|-----------|-------------------|------|----------|---------|------------|-------------|--------|
| cg21585512 | II | 37 | 11 | 122030076 | LOC399959         | 0.42 | 0.02991  | 1.52413 | 0.40281076 | 0.253903156 | 0.149  |
| cg00765705 | I  | 37 | 12 | 124865130 | NCOR2;NCOR2       | 0.42 | 0.02991  | 1.52413 | 0.2287633  | 0.377269314 | -0.149 |
| cg00813509 | I  | 37 | 12 | 124941317 | NCOR2;NCOR2       | 0.67 | 2.34E-05 | 4.63072 | 0.52100242 | 0.372371991 | 0.149  |
| cg14849578 | II | 37 | 12 | 125282480 | SCARB1;SCARB1     | 0.58 | 0.00041  | 3.39184 | 0.63259517 | 0.78178679  | -0.149 |
| cg23670055 | II | 37 | 14 | 34481752  |                   | 0.5  | 0.00432  | 2.36443 | 0.62162644 | 0.472848778 | 0.149  |
| cg21960110 | II | 37 | 16 | 202482    | HBZ               | 0.58 | 0.00041  | 3.39184 | 0.65954246 | 0.51090699  | 0.149  |
| cg08409642 | I  | 37 | 16 | 56641373  | MT2A              | 0.54 | 0.0014   | 2.85345 | 0.44056017 | 0.589730432 | -0.149 |
| cg13375828 | II | 37 | 17 | 3598755   | P2RX5;P2RX5;P2RX  | 0.5  | 0.00432  | 2.36443 | 0.34504667 | 0.195780598 | 0.149  |
| cg24738036 | II | 37 | 17 | 3704476   | ITGAE;ITGAE       | 0.5  | 0.00432  | 2.36443 | 0.60206713 | 0.750673162 | -0.149 |
| cg14192542 | II | 37 | 17 | 64187581  | CCDC46            | 0.46 | 0.01197  | 1.92207 | 0.41306368 | 0.561928299 | -0.149 |
| cg26450228 | II | 37 | 17 | 64575581  | PRKCA             | 0.54 | 0.0014   | 2.85345 | 0.6411071  | 0.790424722 | -0.149 |
| cg01040259 | II | 37 | 17 | 73314451  | GRB2;GRB2         | 0.71 | 4.57E-06 | 5.34042 | 0.67106583 | 0.819907118 | -0.149 |
| cg21984481 | II | 37 | 17 | 79567631  | NPLOC4            | 0.46 | 0.01197  | 1.92207 | 0.62686679 | 0.77577182  | -0.149 |
| cg24236839 | II | 37 | 19 | 5038822   | KDM4B             | 0.67 | 2.34E-05 | 4.63072 | 0.4303356  | 0.579659974 | -0.149 |
| cg22322184 | II | 37 | 19 | 7734203   | RETN              | 0.71 | 4.57E-06 | 5.34042 | 0.36190981 | 0.511235887 | -0.149 |
| cg24141382 | II | 37 | 1  | 41446726  | CTPS              | 0.46 | 0.01197  | 1.92207 | 0.61404097 | 0.465675916 | 0.148  |
| cg20697417 | II | 37 | 1  | 41786797  |                   | 0.46 | 0.01197  | 1.92207 | 0.35814001 | 0.506425309 | -0.148 |
| cg26924218 | II | 37 | 1  | 155950963 |                   | 0.42 | 0.02991  | 1.52413 | 0.63173013 | 0.483812079 | 0.148  |
| cg23088126 | II | 37 | 1  | 207078912 | FAIM3;FAIM3;FAIM  | 0.54 | 0.0014   | 2.85345 | 0.65477303 | 0.507117909 | 0.148  |
| cg15557309 | II | 37 | 1  | 231155948 | MIR1182;FAM89A    | 0.54 | 0.0014   | 2.85345 | 0.68831899 | 0.83649568  | -0.148 |
| cg22413209 | I  | 37 | 2  | 112917281 | FBLN7;FBLN7       | 0.5  | 0.00432  | 2.36443 | 0.78117323 | 0.633326565 | 0.148  |
| cg18904855 | II | 37 | 2  | 231693469 |                   | 0.58 | 0.00041  | 3.39184 | 0.6212814  | 0.473571643 | 0.148  |
| cg11564239 | II | 37 | 2  | 241644188 |                   | 0.54 | 0.0014   | 2.85345 | 0.58247701 | 0.43399786  | 0.148  |
| cg13781758 | II | 37 | 3  | 122823409 | PDIA5;PDIA5       | 0.42 | 0.02991  | 1.52413 | 0.69708705 | 0.548696284 | 0.148  |
| cg02291010 | II | 37 | 5  | 96079433  | CAST;CAST;CAST;CA | 0.46 | 0.01197  | 1.92207 | 0.75421285 | 0.902393289 | -0.148 |
| cg02283238 | II | 37 | 5  | 118691126 | TNFAIP8;TNFAIP8   | 0.54 | 0.0014   | 2.85345 | 0.67092546 | 0.523057249 | 0.148  |
| cg05941376 | II | 37 | 5  | 167836834 | WWC1;WWC1;WW      | 0.46 | 0.01197  | 1.92207 | 0.53058521 | 0.678932403 | -0.148 |
| cg13329862 | II | 37 | 6  | 30850876  | DDR1;DDR1         | 0.5  | 0.00432  | 2.36443 | 0.74730333 | 0.599749463 | 0.148  |
| cg25110523 | II | 37 | 6  | 31868025  | ZBTB12            | 0.42 | 0.02991  | 1.52413 | 0.5022932  | 0.650372107 | -0.148 |
| cg16203210 | II | 37 | 6  | 41905026  | CCND3;CCND3;CCN   | 0.54 | 0.0014   | 2.85345 | 0.72682728 | 0.874467312 | -0.148 |
| cg09471887 | II | 37 | 6  | 90660913  | BACH2;BACH2       | 0.58 | 0.00041  | 3.39184 | 0.71198325 | 0.85999635  | -0.148 |
| cg04963607 | II | 37 | 7  | 598459    | PRKAR1B;PRKAR1B   | 0.75 | 7.61E-07 | 6.11857 | 0.6863781  | 0.834475088 | -0.148 |
| cg17432857 | II | 37 | 7  | 27184438  | HOXA5             | 0.5  | 0.00432  | 2.36443 | 0.59774082 | 0.746147308 | -0.148 |

|            |    |    |    |                                |      |          |         |            |             |        |
|------------|----|----|----|--------------------------------|------|----------|---------|------------|-------------|--------|
| cg21252523 | II | 37 | 7  | 27254071                       | 0.5  | 0.00432  | 2.36443 | 0.60679699 | 0.755054745 | -0.148 |
| cg27405731 | I  | 37 | 7  | 101571203 CUX1;CUX1;CUX1       | 0.58 | 0.00041  | 3.39184 | 0.52724922 | 0.674832982 | -0.148 |
| cg05371552 | I  | 37 | 7  | 158854564 VIPR2                | 0.54 | 0.0014   | 2.85345 | 0.36677314 | 0.514302484 | -0.148 |
| cg03280622 | II | 37 | 8  | 145023013 PLEC1;PLEC1;PLEC1    | 0.58 | 0.00041  | 3.39184 | 0.30816939 | 0.456557593 | -0.148 |
| cg15582789 | II | 37 | 9  | 99145525 SLC35D2               | 0.54 | 0.0014   | 2.85345 | 0.27083477 | 0.418654566 | -0.148 |
| cg13896650 | II | 37 | 9  | 116894310                      | 0.62 | 0.0001   | 3.98291 | 0.68002712 | 0.531850767 | 0.148  |
| cg01870113 | II | 37 | 9  | 140106010 NDOR1;NDOR1;NDOR1    | 0.5  | 0.00432  | 2.36443 | 0.52194343 | 0.669905799 | -0.148 |
| cg23797615 | II | 37 | 11 | 67132472 CLCF1;LOC1001309      | 0.46 | 0.01197  | 1.92207 | 0.44502093 | 0.296564627 | 0.148  |
| cg03962678 | II | 37 | 11 | 118398094 TTC36                | 0.5  | 0.00432  | 2.36443 | 0.50006632 | 0.648482803 | -0.148 |
| cg25194194 | II | 37 | 12 | 69143431 SLC35E3               | 0.54 | 0.0014   | 2.85345 | 0.67685037 | 0.824663616 | -0.148 |
| cg24727480 | II | 37 | 12 | 109901083 KCTD10               | 0.58 | 0.00041  | 3.39184 | 0.27634471 | 0.423854167 | -0.148 |
| cg15985905 | II | 37 | 12 | 128078475                      | 0.54 | 0.0014   | 2.85345 | 0.6896087  | 0.541620492 | 0.148  |
| cg14366598 | II | 37 | 14 | 23841754 IL25;IL25             | 0.54 | 0.0014   | 2.85345 | 0.72334537 | 0.575623728 | 0.148  |
| cg08140459 | II | 37 | 14 | 75086513                       | 0.71 | 4.57E-06 | 5.34042 | 0.48503072 | 0.632925016 | -0.148 |
| cg11942439 | II | 37 | 15 | 41775282 RTF1                  | 0.62 | 0.0001   | 3.98291 | 0.86638507 | 0.718359781 | 0.148  |
| cg14573810 | II | 37 | 15 | 66270794 MEGF11                | 0.46 | 0.01197  | 1.92207 | 0.76048274 | 0.612572005 | 0.148  |
| cg22095582 | II | 37 | 15 | 90131512 C15orf42              | 0.67 | 2.34E-05 | 4.63072 | 0.48435886 | 0.632789405 | -0.148 |
| cg08121317 | II | 37 | 15 | 101327691                      | 0.54 | 0.0014   | 2.85345 | 0.55418046 | 0.702103334 | -0.148 |
| cg08766256 | II | 37 | 16 | 81527504 CMIP;CMIP             | 0.54 | 0.0014   | 2.85345 | 0.42387641 | 0.571596766 | -0.148 |
| cg04033022 | II | 37 | 16 | 89189383 ACSF3;ACSF3;ACSF3     | 0.54 | 0.0014   | 2.85345 | 0.734704   | 0.587071157 | 0.148  |
| cg14509809 | I  | 37 | 17 | 935884 ABR;ABR;ABR             | 0.42 | 0.02991  | 1.52413 | 0.66463028 | 0.516138261 | 0.148  |
| cg23123250 | I  | 37 | 17 | 4440116 SPNS2                  | 0.58 | 0.00041  | 3.39184 | 0.4584641  | 0.606182858 | -0.148 |
| cg02329670 | II | 37 | 17 | 6921400 MIR497;MIR195          | 0.42 | 0.02991  | 1.52413 | 0.51004192 | 0.657993745 | -0.148 |
| cg13984330 | II | 37 | 17 | 58637589                       | 0.46 | 0.01197  | 1.92207 | 0.71457088 | 0.862912397 | -0.148 |
| cg13647973 | I  | 37 | 19 | 56061337                       | 0.46 | 0.01197  | 1.92207 | 0.7536779  | 0.605807174 | 0.148  |
| cg13951069 | I  | 37 | 21 | 43919801 SLC37A1;SLC37A1       | 0.54 | 0.0014   | 2.85345 | 0.77368018 | 0.921940632 | -0.148 |
| cg23955417 | II | 37 | 1  | 26880928 MIR1976;RPS6KA1;      | 0.54 | 0.0014   | 2.85345 | 0.33215558 | 0.478731214 | -0.147 |
| cg02947253 | II | 37 | 1  | 112046700 ADORA3;ADORA3;ADORA3 | 0.58 | 0.00041  | 3.39184 | 0.67118842 | 0.818147962 | -0.147 |
| cg25349990 | II | 37 | 1  | 229294380                      | 0.54 | 0.0014   | 2.85345 | 0.39993205 | 0.546724374 | -0.147 |
| cg13985485 | I  | 37 | 1  | 239550283                      | 0.46 | 0.01197  | 1.92207 | 0.12001369 | 0.266532024 | -0.147 |
| cg08102294 | II | 37 | 3  | 13063918 IQSEC1                | 0.46 | 0.01197  | 1.92207 | 0.49885185 | 0.352210055 | 0.147  |
| cg03891318 | II | 37 | 3  | 139372675 NMNAT3               | 0.46 | 0.01197  | 1.92207 | 0.56887658 | 0.716366699 | -0.147 |
| cg07757358 | II | 37 | 3  | 187897193 LPP;FLJ42393         | 0.46 | 0.01197  | 1.92207 | 0.7848974  | 0.638383415 | 0.147  |

|            |    |    |    |                            |      |          |         |            |             |        |
|------------|----|----|----|----------------------------|------|----------|---------|------------|-------------|--------|
| cg14643001 | II | 37 | 3  | 193848133                  | 0.46 | 0.01197  | 1.92207 | 0.66769702 | 0.521035807 | 0.147  |
| cg12407867 | I  | 37 | 4  | 1167369 LOC100130872-SPC   | 0.62 | 0.0001   | 3.98291 | 0.75730384 | 0.904453016 | -0.147 |
| cg08968034 | II | 37 | 4  | 3022836 GRK4;GRK4;GRK4     | 0.58 | 0.00041  | 3.39184 | 0.67012345 | 0.523021303 | 0.147  |
| cg21811204 | I  | 37 | 5  | 132158625 SHROOM1          | 0.54 | 0.0014   | 2.85345 | 0.45881335 | 0.311594052 | 0.147  |
| cg06019763 | I  | 37 | 6  | 25028080                   | 0.5  | 0.00432  | 2.36443 | 0.77720892 | 0.630364337 | 0.147  |
| cg00920254 | II | 37 | 6  | 44189984 SLC29A1;SLC29A1;S | 0.58 | 0.00041  | 3.39184 | 0.57222487 | 0.719723475 | -0.147 |
| cg16111231 | II | 37 | 6  | 160399700 IGF2R            | 0.54 | 0.0014   | 2.85345 | 0.51294145 | 0.365995228 | 0.147  |
| cg18439339 | II | 37 | 7  | 151441268 PRKAG2;PRKAG2    | 0.54 | 0.0014   | 2.85345 | 0.47130879 | 0.618627961 | -0.147 |
| cg00004996 | II | 37 | 8  | 17271535 MTMR7             | 0.5  | 0.00432  | 2.36443 | 0.69813078 | 0.845458529 | -0.147 |
| cg05459517 | II | 37 | 8  | 123795904 ZHX2             | 0.5  | 0.00432  | 2.36443 | 0.84166858 | 0.694645752 | 0.147  |
| cg07441152 | II | 37 | 8  | 144814911 FAM83H           | 0.42 | 0.02991  | 1.52413 | 0.75161218 | 0.604149567 | 0.147  |
| cg03376308 | II | 37 | 10 | 3497811                    | 0.58 | 0.00041  | 3.39184 | 0.34595352 | 0.492975937 | -0.147 |
| cg24760467 | II | 37 | 10 | 102760784 LZTS2            | 0.46 | 0.01197  | 1.92207 | 0.48160168 | 0.62831155  | -0.147 |
| cg10900641 | I  | 37 | 11 | 1767793 HCCA2;LOC402778    | 0.62 | 0.0001   | 3.98291 | 0.79754072 | 0.944254883 | -0.147 |
| cg18458509 | II | 37 | 11 | 2920189 SLC22A18AS;SLC22.  | 0.5  | 0.00432  | 2.36443 | 0.26928885 | 0.416355539 | -0.147 |
| cg10266336 | II | 37 | 11 | 18270324 SAA2;SAA2         | 0.5  | 0.00432  | 2.36443 | 0.31923245 | 0.466483666 | -0.147 |
| cg21994822 | II | 37 | 11 | 66741747 C11orf86          | 0.46 | 0.01197  | 1.92207 | 0.62728344 | 0.774456356 | -0.147 |
| cg26335578 | II | 37 | 11 | 68722738                   | 0.71 | 4.57E-06 | 5.34042 | 0.44424754 | 0.590805175 | -0.147 |
| cg25273707 | II | 37 | 11 | 76037066                   | 0.54 | 0.0014   | 2.85345 | 0.50514915 | 0.357854063 | 0.147  |
| cg04468671 | II | 37 | 12 | 132337407                  | 0.67 | 2.34E-05 | 4.63072 | 0.44720118 | 0.594155214 | -0.147 |
| cg24741430 | II | 37 | 15 | 67095711                   | 0.75 | 7.61E-07 | 6.11857 | 0.6985679  | 0.845910828 | -0.147 |
| cg12157761 | II | 37 | 15 | 71005778 UACA              | 0.46 | 0.01197  | 1.92207 | 0.72881523 | 0.876078736 | -0.147 |
| cg04004158 | I  | 37 | 16 | 1152474                    | 0.42 | 0.02991  | 1.52413 | 0.87460835 | 0.728057125 | 0.147  |
| cg02484343 | I  | 37 | 16 | 2284734 E4F1               | 0.54 | 0.0014   | 2.85345 | 0.77058535 | 0.6235328   | 0.147  |
| cg08065963 | I  | 37 | 16 | 8985593                    | 0.46 | 0.01197  | 1.92207 | 0.51141929 | 0.36484951  | 0.147  |
| cg00649632 | II | 37 | 16 | 16108802 ABCC1;ABCC1;ABCC  | 0.5  | 0.00432  | 2.36443 | 0.70978183 | 0.562465981 | 0.147  |
| cg08181850 | II | 37 | 16 | 17200244 XYLT1             | 0.54 | 0.0014   | 2.85345 | 0.53686003 | 0.683722507 | -0.147 |
| cg07434438 | II | 37 | 16 | 72961899 ZFH3;ZFH3         | 0.58 | 0.00041  | 3.39184 | 0.70348417 | 0.850566351 | -0.147 |
| cg22210779 | I  | 37 | 17 | 80818772 TBCD              | 0.46 | 0.01197  | 1.92207 | 0.9270989  | 0.780056378 | 0.147  |
| cg21121609 | II | 37 | 19 | 7766960 FCER2;FCER2        | 0.42 | 0.02991  | 1.52413 | 0.3661308  | 0.219311833 | 0.147  |
| cg06905453 | I  | 37 | 19 | 14089284 RFX1              | 0.46 | 0.01197  | 1.92207 | 0.222664   | 0.369988313 | -0.147 |
| cg19587280 | I  | 37 | 19 | 18770726 KLHL26            | 0.67 | 2.34E-05 | 4.63072 | 0.65398457 | 0.506576707 | 0.147  |
| cg15581429 | II | 37 | 19 | 39369353 SIRT2;SIRT2;RINL  | 0.67 | 2.34E-05 | 4.63072 | 0.58930446 | 0.442420415 | 0.147  |

|            |    |    |    |                            |      |          |         |            |             |        |
|------------|----|----|----|----------------------------|------|----------|---------|------------|-------------|--------|
| cg26476925 | II | 37 | 19 | 45245446                   | 0.58 | 0.00041  | 3.39184 | 0.29720822 | 0.443768271 | -0.147 |
| cg24737324 | II | 37 | 20 | 19867143                   | 0.58 | 0.00041  | 3.39184 | 0.52395955 | 0.67061318  | -0.147 |
| cg12049875 | II | 37 | 20 | 19955868 RIN2              | 0.58 | 0.00041  | 3.39184 | 0.48686098 | 0.634119043 | -0.147 |
| cg06036288 | II | 37 | 20 | 61971412                   | 0.62 | 0.0001   | 3.98291 | 0.39203017 | 0.53942035  | -0.147 |
| cg21291385 | II | 37 | 21 | 35448215 MRPS6;SLC5A3      | 0.54 | 0.0014   | 2.85345 | 0.47273723 | 0.620006503 | -0.147 |
| cg21871091 | II | 37 | 21 | 38349937 HLCS              | 0.46 | 0.01197  | 1.92207 | 0.52826798 | 0.674979873 | -0.147 |
| cg07048516 | II | 37 | 22 | 24105087 C22orf15          | 0.54 | 0.0014   | 2.85345 | 0.31159619 | 0.458819921 | -0.147 |
| cg26001125 | II | 37 | 22 | 24823050 ADORA2A           | 0.58 | 0.00041  | 3.39184 | 0.55814385 | 0.411184457 | 0.147  |
| cg01403010 | II | 37 | 22 | 38609534 MAFF;MAFF;MAFF;   | 0.5  | 0.00432  | 2.36443 | 0.34333189 | 0.4905855   | -0.147 |
| cg24004483 | I  | 37 | 1  | 944783                     | 0.42 | 0.02991  | 1.52413 | 0.42102706 | 0.567238531 | -0.146 |
| cg17163404 | II | 37 | 1  | 19414438 UBR4              | 0.42 | 0.02991  | 1.52413 | 0.74189058 | 0.595439189 | 0.146  |
| cg26527263 | I  | 37 | 1  | 53875972                   | 0.58 | 0.00041  | 3.39184 | 0.68330782 | 0.537099866 | 0.146  |
| cg25103275 | II | 37 | 1  | 111025075 CYMP             | 0.5  | 0.00432  | 2.36443 | 0.67864469 | 0.824161279 | -0.146 |
| cg01417714 | II | 37 | 1  | 155223726 FAM189B;FAM189I  | 0.54 | 0.0014   | 2.85345 | 0.4921068  | 0.638193857 | -0.146 |
| cg22787719 | II | 37 | 1  | 209570949                  | 0.58 | 0.00041  | 3.39184 | 0.22849111 | 0.374045523 | -0.146 |
| cg02961280 | II | 37 | 2  | 220115026 STK16;STK16;TUBA | 0.54 | 0.0014   | 2.85345 | 0.27357438 | 0.419388991 | -0.146 |
| cg14512813 | II | 37 | 3  | 187618877                  | 0.46 | 0.01197  | 1.92207 | 0.78823946 | 0.642311352 | 0.146  |
| cg02014217 | II | 37 | 4  | 1015600 FGFRL1;FGFRL1;FGI  | 0.46 | 0.01197  | 1.92207 | 0.44029537 | 0.294685505 | 0.146  |
| cg24403649 | II | 37 | 4  | 39172243                   | 0.5  | 0.00432  | 2.36443 | 0.59750316 | 0.74371622  | -0.146 |
| cg22021794 | II | 37 | 5  | 54177306                   | 0.54 | 0.0014   | 2.85345 | 0.76113358 | 0.614995324 | 0.146  |
| cg26704043 | II | 37 | 6  | 5282702 FARS2              | 0.46 | 0.01197  | 1.92207 | 0.5641281  | 0.710177188 | -0.146 |
| cg06694826 | II | 37 | 6  | 15675176                   | 0.58 | 0.00041  | 3.39184 | 0.35430794 | 0.500068014 | -0.146 |
| cg05859264 | II | 37 | 6  | 36097692 MAPK13            | 0.5  | 0.00432  | 2.36443 | 0.56690492 | 0.420600196 | 0.146  |
| cg22719623 | II | 37 | 6  | 154360732 OPRM1;OPRM1;OP   | 0.5  | 0.00432  | 2.36443 | 0.50159776 | 0.647241334 | -0.146 |
| cg14587213 | II | 37 | 7  | 213703 FAM20C              | 0.62 | 0.0001   | 3.98291 | 0.59060041 | 0.736346657 | -0.146 |
| cg04453501 | I  | 37 | 7  | 533963                     | 0.42 | 0.02991  | 1.52413 | 0.70913346 | 0.855254465 | -0.146 |
| cg21768702 | II | 37 | 7  | 1040081 C7orf50;C7orf50;C7 | 0.46 | 0.01197  | 1.92207 | 0.61119557 | 0.464977463 | 0.146  |
| cg17633015 | I  | 37 | 7  | 2020501 MAD1L1;MAD1L1;M    | 0.42 | 0.02991  | 1.52413 | 0.7884938  | 0.642048393 | 0.146  |
| cg23532927 | II | 37 | 7  | 45977067                   | 0.54 | 0.0014   | 2.85345 | 0.43216994 | 0.578232372 | -0.146 |
| cg01092213 | II | 37 | 7  | 48127925 UPP1;UPP1         | 0.5  | 0.00432  | 2.36443 | 0.26902213 | 0.415340418 | -0.146 |
| cg18245976 | II | 37 | 7  | 158708271 WDR60            | 0.58 | 0.00041  | 3.39184 | 0.36254723 | 0.508572769 | -0.146 |
| cg13582028 | II | 37 | 8  | 631115 ERICH1              | 0.71 | 4.57E-06 | 5.34042 | 0.34769647 | 0.493384678 | -0.146 |
| cg16292768 | II | 37 | 8  | 27467783 CLU;CLU;CLU       | 0.54 | 0.0014   | 2.85345 | 0.62477929 | 0.771016544 | -0.146 |

|            |    |    |    |           |                  |      |          |         |            |             |        |
|------------|----|----|----|-----------|------------------|------|----------|---------|------------|-------------|--------|
| cg03400695 | II | 37 | 8  | 142162582 | DENND3           | 0.58 | 0.00041  | 3.39184 | 0.71175556 | 0.857743318 | -0.146 |
| cg08841552 | II | 37 | 9  | 140444378 | PNPLA7;PNPLA7    | 0.42 | 0.02991  | 1.52413 | 0.5094479  | 0.363781254 | 0.146  |
| cg10427868 | II | 37 | 10 | 80936798  | ZMIZ1            | 0.5  | 0.00432  | 2.36443 | 0.47133449 | 0.324918925 | 0.146  |
| cg17879101 | I  | 37 | 10 | 126329354 | FAM53B           | 0.42 | 0.02991  | 1.52413 | 0.38891044 | 0.534636207 | -0.146 |
| cg20456620 | II | 37 | 10 | 134377343 | INPP5A           | 0.42 | 0.02991  | 1.52413 | 0.79488851 | 0.648678022 | 0.146  |
| cg03411376 | I  | 37 | 11 | 2432720   | TRPM5            | 0.62 | 0.0001   | 3.98291 | 0.59420496 | 0.73972323  | -0.146 |
| cg13332953 | II | 37 | 11 | 12003759  | DKK3;DKK3;DKK3   | 0.46 | 0.01197  | 1.92207 | 0.70612769 | 0.560335116 | 0.146  |
| cg20792833 | II | 37 | 11 | 67205195  | PTPRCAP          | 0.58 | 0.00041  | 3.39184 | 0.27997807 | 0.134081564 | 0.146  |
| cg06213635 | I  | 37 | 11 | 129488336 |                  | 0.5  | 0.00432  | 2.36443 | 0.61860259 | 0.764199882 | -0.146 |
| cg23702046 | II | 37 | 12 | 3371110   | TSPAN9;TSPAN9    | 0.67 | 2.34E-05 | 4.63072 | 0.70443893 | 0.850892152 | -0.146 |
| cg04772575 | I  | 37 | 12 | 123431865 | ABCB9;ABCB9;ABCF | 0.58 | 0.00041  | 3.39184 | 0.42996776 | 0.575591123 | -0.146 |
| cg24722198 | II | 37 | 13 | 113567732 |                  | 0.42 | 0.02991  | 1.52413 | 0.6468401  | 0.500796029 | 0.146  |
| cg03875678 | II | 37 | 14 | 25103546  | GZMB             | 0.42 | 0.02991  | 1.52413 | 0.26557094 | 0.411293127 | -0.146 |
| cg21752660 | II | 37 | 15 | 52824726  |                  | 0.46 | 0.01197  | 1.92207 | 0.31672514 | 0.463217767 | -0.146 |
| cg26891150 | I  | 37 | 15 | 79575634  | ANKRD34C         | 0.58 | 0.00041  | 3.39184 | 0.24191985 | 0.388199149 | -0.146 |
| cg06578342 | II | 37 | 16 | 4349215   |                  | 0.67 | 2.34E-05 | 4.63072 | 0.39388228 | 0.53957343  | -0.146 |
| cg24366564 | I  | 37 | 17 | 2843149   | RAP1GAP2;RAP1GA  | 0.58 | 0.00041  | 3.39184 | 0.65894919 | 0.804974134 | -0.146 |
| cg13330559 | I  | 37 | 17 | 11144043  | SHISA6           | 0.46 | 0.01197  | 1.92207 | 0.03829844 | 0.184498648 | -0.146 |
| cg15668538 | II | 37 | 17 | 15931082  | TTC19            | 0.46 | 0.01197  | 1.92207 | 0.72838291 | 0.582846935 | 0.146  |
| cg04308167 | II | 37 | 17 | 19440767  | SLC47A1          | 0.5  | 0.00432  | 2.36443 | 0.30932601 | 0.45537144  | -0.146 |
| cg10334489 | II | 37 | 17 | 25798878  | KSR1             | 0.58 | 0.00041  | 3.39184 | 0.59612837 | 0.450437975 | 0.146  |
| cg20673721 | II | 37 | 17 | 25859382  | KSR1             | 0.62 | 0.0001   | 3.98291 | 0.59352952 | 0.739861565 | -0.146 |
| cg25246246 | II | 37 | 17 | 43503131  | ARHGAP27         | 0.54 | 0.0014   | 2.85345 | 0.46522856 | 0.611371103 | -0.146 |
| cg11434671 | II | 37 | 17 | 74524611  | CYGB             | 0.67 | 2.34E-05 | 4.63072 | 0.46327191 | 0.316863813 | 0.146  |
| cg18437039 | II | 37 | 19 | 1444202   |                  | 0.46 | 0.01197  | 1.92207 | 0.29811549 | 0.443709555 | -0.146 |
| cg24723690 | II | 37 | 19 | 52213977  |                  | 0.54 | 0.0014   | 2.85345 | 0.6295775  | 0.483691051 | 0.146  |
| cg11254700 | I  | 37 | 19 | 53561386  |                  | 0.42 | 0.02991  | 1.52413 | 0.34481586 | 0.491159277 | -0.146 |
| cg09835408 | II | 37 | 20 | 31352399  | DNMT3B;DNMT3B;   | 0.5  | 0.00432  | 2.36443 | 0.19089402 | 0.337180506 | -0.146 |
| cg00929635 | I  | 37 | 20 | 44035918  | DBNDD2;DBNDD2;I  | 0.5  | 0.00432  | 2.36443 | 0.3661033  | 0.512448811 | -0.146 |
| cg19067730 | II | 37 | 20 | 44518824  | CTSA;NEURL2;CTSA | 0.62 | 0.0001   | 3.98291 | 0.18758289 | 0.333776009 | -0.146 |
| cg15765398 | II | 37 | 21 | 46409994  |                  | 0.42 | 0.02991  | 1.52413 | 0.50441735 | 0.358750241 | 0.146  |
| cg07924575 | II | 37 | 22 | 26881231  | HPS4;SRRD        | 0.5  | 0.00432  | 2.36443 | 0.67858856 | 0.824800814 | -0.146 |
| cg15702277 | II | 37 | 1  | 8477935   | RERE;RERE;RERE   | 0.62 | 0.0001   | 3.98291 | 0.43555045 | 0.580933109 | -0.145 |

|            |    |    |    |           |                    |      |          |         |            |             |        |
|------------|----|----|----|-----------|--------------------|------|----------|---------|------------|-------------|--------|
| cg07155422 | II | 37 | 1  | 12114402  |                    | 0.5  | 0.00432  | 2.36443 | 0.7424752  | 0.597179289 | 0.145  |
| cg23840027 | II | 37 | 1  | 29225533  | EPB41;EPB41;EPB4   | 0.54 | 0.0014   | 2.85345 | 0.47453889 | 0.619474733 | -0.145 |
| cg13470063 | II | 37 | 1  | 43766206  | TIE1               | 0.67 | 2.34E-05 | 4.63072 | 0.52573923 | 0.670861572 | -0.145 |
| cg15715337 | II | 37 | 1  | 85600447  |                    | 0.46 | 0.01197  | 1.92207 | 0.55981321 | 0.70471004  | -0.145 |
| cg13531460 | II | 37 | 2  | 231790813 | GPR55              | 0.46 | 0.01197  | 1.92207 | 0.74371302 | 0.598673563 | 0.145  |
| cg13475822 | II | 37 | 3  | 9210116   | SRGAP3;SRGAP3      | 0.5  | 0.00432  | 2.36443 | 0.65296829 | 0.507862344 | 0.145  |
| cg16588163 | I  | 37 | 3  | 190251464 | IL1RAP;IL1RAP;IL1R | 0.42 | 0.02991  | 1.52413 | 0.30291583 | 0.447527329 | -0.145 |
| cg18713687 | II | 37 | 3  | 195489789 | MUC4;MUC4;MUC4     | 0.62 | 0.0001   | 3.98291 | 0.74336388 | 0.8887156   | -0.145 |
| cg13731523 | I  | 37 | 4  | 3047190   |                    | 0.58 | 0.00041  | 3.39184 | 0.60241319 | 0.747075934 | -0.145 |
| cg26562462 | I  | 37 | 4  | 6929045   | TBC1D14;TBC1D14    | 0.42 | 0.02991  | 1.52413 | 0.46588364 | 0.611042525 | -0.145 |
| cg22197936 | II | 37 | 5  | 76325203  | AGGF1              | 0.5  | 0.00432  | 2.36443 | 0.67948354 | 0.824348375 | -0.145 |
| cg10787197 | II | 37 | 6  | 11779941  | C6orf105;C6orf105  | 0.58 | 0.00041  | 3.39184 | 0.65006739 | 0.795558872 | -0.145 |
| cg23953820 | I  | 37 | 6  | 30851051  | DDR1;DDR1          | 0.54 | 0.0014   | 2.85345 | 0.49774793 | 0.352547655 | 0.145  |
| cg14482998 | II | 37 | 6  | 111984370 | FYN;FYN;FYN        | 0.58 | 0.00041  | 3.39184 | 0.41445904 | 0.558960699 | -0.145 |
| cg14030904 | II | 37 | 6  | 149806732 | ZC3H12D            | 0.58 | 0.00041  | 3.39184 | 0.38829425 | 0.242885486 | 0.145  |
| cg03634833 | II | 37 | 7  | 965534    | ADAP1              | 0.62 | 0.0001   | 3.98291 | 0.35697302 | 0.502282858 | -0.145 |
| cg09363068 | II | 37 | 7  | 1004748   | COX19              | 0.54 | 0.0014   | 2.85345 | 0.66828752 | 0.813315994 | -0.145 |
| cg04682977 | II | 37 | 7  | 1062711   | C7orf50;MIR339;C7  | 0.46 | 0.01197  | 1.92207 | 0.50838519 | 0.363657442 | 0.145  |
| cg05729490 | II | 37 | 7  | 27404187  |                    | 0.5  | 0.00432  | 2.36443 | 0.56825146 | 0.713667791 | -0.145 |
| cg23723486 | II | 37 | 7  | 101361745 |                    | 0.54 | 0.0014   | 2.85345 | 0.37533601 | 0.51993193  | -0.145 |
| cg08913523 | II | 37 | 8  | 126649807 |                    | 0.42 | 0.02991  | 1.52413 | 0.28325651 | 0.42849171  | -0.145 |
| cg07752613 | II | 37 | 8  | 141554311 | EIF2C2;EIF2C2      | 0.54 | 0.0014   | 2.85345 | 0.6789103  | 0.824366926 | -0.145 |
| cg21197594 | II | 37 | 9  | 140656981 | EHMT1;FLJ40292;E   | 0.42 | 0.02991  | 1.52413 | 0.49253498 | 0.347192982 | 0.145  |
| cg23863328 | II | 37 | 10 | 49879704  |                    | 0.42 | 0.02991  | 1.52413 | 0.56914019 | 0.424546328 | 0.145  |
| cg25268100 | I  | 37 | 10 | 134457731 | INPP5A             | 0.62 | 0.0001   | 3.98291 | 0.73164382 | 0.586548175 | 0.145  |
| cg15484375 | II | 37 | 11 | 18287647  | SAA1;SAA1          | 0.67 | 2.34E-05 | 4.63072 | 0.54533453 | 0.690531456 | -0.145 |
| cg27636058 | II | 37 | 11 | 57443308  | ZDHHC5             | 0.5  | 0.00432  | 2.36443 | 0.83962109 | 0.694841333 | 0.145  |
| cg09445967 | II | 37 | 11 | 60634850  | ZP1                | 0.54 | 0.0014   | 2.85345 | 0.49493708 | 0.349474248 | 0.145  |
| cg24755189 | II | 37 | 11 | 62475373  | BSCL2;BSCL2;GNG3   | 0.46 | 0.01197  | 1.92207 | 0.74822867 | 0.602857445 | 0.145  |
| cg21592954 | II | 37 | 11 | 126304039 | KIRREL3;KIRREL3    | 0.5  | 0.00432  | 2.36443 | 0.36617303 | 0.511567639 | -0.145 |
| cg22158248 | II | 37 | 12 | 112204136 | ALDH2              | 0.46 | 0.01197  | 1.92207 | 0.59831718 | 0.452893391 | 0.145  |
| cg19445588 | II | 37 | 12 | 116904641 |                    | 0.46 | 0.01197  | 1.92207 | 0.72461525 | 0.869202573 | -0.145 |
| cg10901569 | II | 37 | 12 | 121582875 | P2RX7              | 0.46 | 0.01197  | 1.92207 | 0.60030278 | 0.744836517 | -0.145 |

|            |    |    |    |           |                   |      |          |         |            |             |        |
|------------|----|----|----|-----------|-------------------|------|----------|---------|------------|-------------|--------|
| cg09931783 | II | 37 | 12 | 123469669 | PITPNM2           | 0.58 | 0.00041  | 3.39184 | 0.52985774 | 0.675339413 | -0.145 |
| cg24598712 | II | 37 | 12 | 133072859 | FBRSL1            | 0.58 | 0.00041  | 3.39184 | 0.65557222 | 0.800801564 | -0.145 |
| cg23489384 | I  | 37 | 14 | 21199099  |                   | 0.46 | 0.01293  | 1.88854 | 0.51151292 | 0.366941274 | 0.145  |
| cg14389122 | II | 37 | 15 | 74945851  | EDC3;EDC3;EDC3    | 0.5  | 0.00432  | 2.36443 | 0.57222321 | 0.427437671 | 0.145  |
| cg17241841 | II | 37 | 15 | 89158993  |                   | 0.46 | 0.01197  | 1.92207 | 0.73134552 | 0.586423393 | 0.145  |
| cg10416668 | II | 37 | 16 | 27437730  | IL21R;IL21R;IL21R | 0.46 | 0.01197  | 1.92207 | 0.74706462 | 0.602103411 | 0.145  |
| cg27463141 | II | 37 | 16 | 56689112  |                   | 0.58 | 0.00041  | 3.39184 | 0.6680515  | 0.522733149 | 0.145  |
| cg02961798 | II | 37 | 16 | 67687392  | RLTPR             | 0.46 | 0.01197  | 1.92207 | 0.70437162 | 0.849657216 | -0.145 |
| cg07793033 | II | 37 | 16 | 85256423  |                   | 0.42 | 0.02991  | 1.52413 | 0.57962008 | 0.724548197 | -0.145 |
| cg07548791 | I  | 37 | 16 | 86012053  |                   | 0.5  | 0.00432  | 2.36443 | 0.27451191 | 0.419295808 | -0.145 |
| cg05829375 | II | 37 | 16 | 86012085  |                   | 0.5  | 0.00432  | 2.36443 | 0.33141848 | 0.476902651 | -0.145 |
| cg01591830 | II | 37 | 16 | 89666000  |                   | 0.58 | 0.00041  | 3.39184 | 0.51113276 | 0.365684004 | 0.145  |
| cg02723774 | II | 37 | 17 | 1378119   | MYO1C;MYO1C;MY    | 0.46 | 0.01197  | 1.92207 | 0.6405817  | 0.49597169  | 0.145  |
| cg07324245 | II | 37 | 17 | 75445905  | SEPT9;SEPT9;SEPT9 | 0.58 | 0.00041  | 3.39184 | 0.68150274 | 0.536849558 | 0.145  |
| cg25826463 | I  | 37 | 19 | 3369820   | NFIC;NFIC         | 0.5  | 0.00432  | 2.36443 | 0.42919898 | 0.574197121 | -0.145 |
| cg05898333 | II | 37 | 20 | 62549385  | MIR941-1;DNAJC5;I | 0.46 | 0.01197  | 1.92207 | 0.65961191 | 0.514292472 | 0.145  |
| cg14606328 | II | 37 | 21 | 45177639  | PDXK              | 0.67 | 2.34E-05 | 4.63072 | 0.69401361 | 0.83873266  | -0.145 |
| cg03733278 | II | 37 | 22 | 20760922  | ZNF74;ZNF74       | 0.54 | 0.0014   | 2.85345 | 0.81527768 | 0.670067277 | 0.145  |
| cg03382805 | I  | 37 | 22 | 23905582  |                   | 0.5  | 0.00432  | 2.36443 | 0.60656724 | 0.461761582 | 0.145  |
| cg13253729 | II | 37 | 22 | 24032426  | LOC91316;RGL4     | 0.62 | 0.0001   | 3.98291 | 0.64504036 | 0.790342636 | -0.145 |
| cg00488514 | II | 37 | 22 | 26877690  | HPS4              | 0.5  | 0.00432  | 2.36443 | 0.49297206 | 0.638090261 | -0.145 |
| cg18396403 | II | 37 | 22 | 38615368  | TMEM184B          | 0.46 | 0.01197  | 1.92207 | 0.32558377 | 0.470367779 | -0.145 |
| cg16068833 | II | 37 | 1  | 26644515  | UBXN11;CD52       | 0.62 | 0.0001   | 3.98291 | 0.25748321 | 0.113566352 | 0.144  |
| cg10208610 | II | 37 | 1  | 27326422  | TRNP1             | 0.58 | 0.00041  | 3.39184 | 0.55109577 | 0.695199605 | -0.144 |
| cg15459165 | II | 37 | 1  | 31223850  | LAPTM5            | 0.5  | 0.00432  | 2.36443 | 0.23684523 | 0.092701319 | 0.144  |
| cg16356622 | II | 37 | 1  | 36351841  | EIF2C1            | 0.42 | 0.02991  | 1.52413 | 0.4528225  | 0.597131409 | -0.144 |
| cg09856274 | II | 37 | 1  | 43304307  | ERMAP;ERMAP       | 0.42 | 0.02991  | 1.52413 | 0.45079907 | 0.595166567 | -0.144 |
| cg00056754 | II | 37 | 1  | 167063958 | DUSP27            | 0.5  | 0.00432  | 2.36443 | 0.70359555 | 0.847972777 | -0.144 |
| cg22014289 | II | 37 | 2  | 109952974 | SH3RF3            | 0.42 | 0.02991  | 1.52413 | 0.58408253 | 0.439751853 | 0.144  |
| cg25758828 | II | 37 | 2  | 113976143 | PAX8;PAX8;PAX8;P  | 0.54 | 0.0014   | 2.85345 | 0.7343332  | 0.878802296 | -0.144 |
| cg01796438 | II | 37 | 3  | 11312864  | ATG7;ATG7;ATG7    | 0.54 | 0.0014   | 2.85345 | 0.66074784 | 0.804325417 | -0.144 |
| cg23202468 | I  | 37 | 3  | 42705828  | ZBTB47            | 0.42 | 0.02991  | 1.52413 | 0.46132112 | 0.317581466 | 0.144  |
| cg03655330 | II | 37 | 3  | 50337494  | HYAL1;HYAL1;HYAL  | 0.5  | 0.00432  | 2.36443 | 0.2785241  | 0.422795859 | -0.144 |

|            |    |    |    |                             |      |          |         |            |             |        |
|------------|----|----|----|-----------------------------|------|----------|---------|------------|-------------|--------|
| cg05068866 | II | 37 | 3  | 66633374                    | 0.5  | 0.00432  | 2.36443 | 0.40098095 | 0.257165134 | 0.144  |
| cg20424311 | II | 37 | 4  | 141221527 SCOC              | 0.5  | 0.00432  | 2.36443 | 0.59526554 | 0.738955518 | -0.144 |
| cg16707952 | II | 37 | 6  | 30851632 DDR1;DDR1          | 0.58 | 0.00041  | 3.39184 | 0.66414357 | 0.520171354 | 0.144  |
| cg16580935 | I  | 37 | 6  | 33246149 B3GALT4            | 0.54 | 0.0014   | 2.85345 | 0.78612466 | 0.641688233 | 0.144  |
| cg12682870 | II | 37 | 6  | 43766804                    | 0.46 | 0.01197  | 1.92207 | 0.24927595 | 0.39351424  | -0.144 |
| cg02213045 | II | 37 | 6  | 43967803 C6orf223           | 0.46 | 0.01197  | 1.92207 | 0.83373766 | 0.689890212 | 0.144  |
| cg15222091 | II | 37 | 6  | 167536069 CCR6;CCR6         | 0.42 | 0.02991  | 1.52413 | 0.46873247 | 0.324817704 | 0.144  |
| cg19723715 | II | 37 | 7  | 1125817 GPER;C7orf50;C7or   | 0.46 | 0.01197  | 1.92207 | 0.79062053 | 0.646447514 | 0.144  |
| cg20848988 | II | 37 | 7  | 36247779 EEPD1              | 0.62 | 0.0001   | 3.98291 | 0.20218285 | 0.345962031 | -0.144 |
| cg14714629 | II | 37 | 7  | 99495452 TRIM4;TRIM4        | 0.46 | 0.01197  | 1.92207 | 0.47801811 | 0.622280361 | -0.144 |
| cg12782180 | I  | 37 | 7  | 127880932 LEP               | 0.46 | 0.01197  | 1.92207 | 0.50693669 | 0.650495462 | -0.144 |
| cg18734433 | II | 37 | 7  | 150086169 ZNF775            | 0.58 | 0.00041  | 3.39184 | 0.45560916 | 0.600079085 | -0.144 |
| cg10012512 | I  | 37 | 7  | 157224041                   | 0.42 | 0.02991  | 1.52413 | 0.8836255  | 0.739740881 | 0.144  |
| cg11908155 | II | 37 | 8  | 11625764 NEIL2;NEIL2;NEIL2; | 0.5  | 0.00432  | 2.36443 | 0.64639412 | 0.502498609 | 0.144  |
| cg01854491 | I  | 37 | 8  | 144815021 FAM83H            | 0.42 | 0.02991  | 1.52413 | 0.71938521 | 0.57541677  | 0.144  |
| cg14294859 | I  | 37 | 9  | 130862556 SLC25A25;SLC25A2  | 0.5  | 0.00432  | 2.36443 | 0.73139379 | 0.875491302 | -0.144 |
| cg14297444 | II | 37 | 9  | 130978697 DNMT1;DNMT1       | 0.5  | 0.00432  | 2.36443 | 0.71696215 | 0.572782114 | 0.144  |
| cg27382409 | II | 37 | 10 | 47088062 PPYR1              | 0.62 | 0.0001   | 3.98291 | 0.61086478 | 0.467301761 | 0.144  |
| cg24417845 | II | 37 | 10 | 70816008                    | 0.46 | 0.01197  | 1.92207 | 0.34164716 | 0.485549151 | -0.144 |
| cg10521450 | II | 37 | 10 | 105439280 SH3PXD2A          | 0.5  | 0.00432  | 2.36443 | 0.46916489 | 0.324909506 | 0.144  |
| cg02082273 | II | 37 | 11 | 10473038 AMPD3              | 0.5  | 0.00432  | 2.36443 | 0.48251437 | 0.338774901 | 0.144  |
| cg04926244 | II | 37 | 12 | 24737251 C12orf67           | 0.42 | 0.02991  | 1.52413 | 0.53439507 | 0.678842509 | -0.144 |
| cg17772430 | II | 37 | 12 | 33052596                    | 0.54 | 0.0014   | 2.85345 | 0.35794948 | 0.501965542 | -0.144 |
| cg21455901 | II | 37 | 13 | 21012516 CRYL1              | 0.71 | 4.57E-06 | 5.34042 | 0.48093665 | 0.625019029 | -0.144 |
| cg06470855 | I  | 37 | 13 | 112997365                   | 0.58 | 0.00041  | 3.39184 | 0.59947958 | 0.74320916  | -0.144 |
| cg21230021 | II | 37 | 14 | 101530770 MIR412;MIR410;M   | 0.46 | 0.01197  | 1.92207 | 0.78067897 | 0.63628305  | 0.144  |
| cg02287710 | I  | 37 | 14 | 102027660 DIO3;MIR1247      | 0.58 | 0.00041  | 3.39184 | 0.37687535 | 0.520710972 | -0.144 |
| cg18991417 | II | 37 | 14 | 104391679                   | 0.62 | 0.0001   | 3.98291 | 0.58307024 | 0.727491908 | -0.144 |
| cg27155939 | II | 37 | 15 | 40347163                    | 0.5  | 0.00432  | 2.36443 | 0.28649265 | 0.142460753 | 0.144  |
| cg09803904 | II | 37 | 15 | 89939709 LOC254559          | 0.62 | 0.0001   | 3.98291 | 0.65688733 | 0.80063788  | -0.144 |
| cg08166214 | II | 37 | 16 | 1027357                     | 0.46 | 0.01197  | 1.92207 | 0.67875883 | 0.534414104 | 0.144  |
| cg02513379 | II | 37 | 16 | 27414281 IL21R;IL21R        | 0.71 | 4.57E-06 | 5.34042 | 0.28461764 | 0.140765234 | 0.144  |
| cg04767841 | II | 37 | 16 | 85656678 KIAA0182;KIAA018:  | 0.54 | 0.0014   | 2.85345 | 0.44123147 | 0.585117081 | -0.144 |

|            |    |    |    |                             |      |          |         |            |             |        |
|------------|----|----|----|-----------------------------|------|----------|---------|------------|-------------|--------|
| cg07308381 | II | 37 | 17 | 6917370 RNASEK;C17orf49;C   | 0.46 | 0.01197  | 1.92207 | 0.77290806 | 0.628839487 | 0.144  |
| cg05533539 | II | 37 | 17 | 44104521 MAPT;MAPT;MAPT     | 0.42 | 0.02991  | 1.52413 | 0.34879102 | 0.492803613 | -0.144 |
| cg19026231 | II | 37 | 17 | 73761710 GALK1              | 0.46 | 0.01197  | 1.92207 | 0.7942636  | 0.650338359 | 0.144  |
| cg18437480 | II | 37 | 17 | 76130305 TMC8               | 0.58 | 0.00041  | 3.39184 | 0.35786544 | 0.213820469 | 0.144  |
| cg22233020 | II | 37 | 19 | 1926143                     | 0.46 | 0.01197  | 1.92207 | 0.64074142 | 0.49701915  | 0.144  |
| cg19907483 | I  | 37 | 19 | 6040198 RFX2;RFX2           | 0.46 | 0.01197  | 1.92207 | 0.81919193 | 0.675099068 | 0.144  |
| cg11588903 | II | 37 | 19 | 17208493 MYO9B;MYO9B        | 0.67 | 2.34E-05 | 4.63072 | 0.68953036 | 0.833256234 | -0.144 |
| cg07569288 | I  | 37 | 19 | 50002551 RPS11              | 0.42 | 0.02991  | 1.52413 | 0.7834522  | 0.639062669 | 0.144  |
| cg18112953 | II | 37 | 20 | 47448545                    | 0.5  | 0.00432  | 2.36443 | 0.35173641 | 0.495397626 | -0.144 |
| cg15815827 | II | 37 | 20 | 61546407 DIDO1;DIDO1;DIDC   | 0.54 | 0.0014   | 2.85345 | 0.2974528  | 0.441808102 | -0.144 |
| cg00805193 | II | 37 | 20 | 62609362 SAMD10             | 0.46 | 0.01197  | 1.92207 | 0.39175156 | 0.535774466 | -0.144 |
| cg17972162 | II | 37 | 22 | 39496387 APOBEC3H;APOBEC    | 0.5  | 0.00432  | 2.36443 | 0.65442295 | 0.509951098 | 0.144  |
| cg24878051 | II | 37 | 1  | 3305115 PRDM16;PRDM16       | 0.54 | 0.0014   | 2.85345 | 0.76898282 | 0.625680343 | 0.143  |
| cg24003955 | II | 37 | 1  | 9912508 CTNNBIP1;CTNNBIF    | 0.5  | 0.00432  | 2.36443 | 0.61823414 | 0.76105055  | -0.143 |
| cg02053477 | II | 37 | 1  | 22615900                    | 0.5  | 0.00432  | 2.36443 | 0.7471835  | 0.603734624 | 0.143  |
| cg21805788 | II | 37 | 1  | 109134372 FAM102B           | 0.46 | 0.01197  | 1.92207 | 0.61560628 | 0.758627991 | -0.143 |
| cg20169988 | II | 37 | 1  | 153330776 S100A9            | 0.54 | 0.0014   | 2.85345 | 0.26369506 | 0.406971263 | -0.143 |
| cg06470727 | II | 37 | 2  | 26723062 OTOF               | 0.46 | 0.01197  | 1.92207 | 0.54260486 | 0.399930054 | 0.143  |
| cg15736127 | II | 37 | 2  | 157292127 GPD2;GPD2;GPD2    | 0.46 | 0.01197  | 1.92207 | 0.24473931 | 0.387529881 | -0.143 |
| cg15476790 | II | 37 | 2  | 218786102 TNS1              | 0.58 | 0.00041  | 3.39184 | 0.76881292 | 0.62628909  | 0.143  |
| cg15033269 | II | 37 | 3  | 42631489 SS18L2             | 0.46 | 0.01197  | 1.92207 | 0.63700235 | 0.779575838 | -0.143 |
| cg15157945 | II | 37 | 3  | 47023603 NBEAL2             | 0.67 | 2.34E-05 | 4.63072 | 0.35713368 | 0.500630686 | -0.143 |
| cg19463199 | II | 37 | 3  | 197401858 MIR922;KIAA0226;l | 0.42 | 0.02991  | 1.52413 | 0.63440914 | 0.491466813 | 0.143  |
| cg12044923 | II | 37 | 4  | 5207312 STK32B              | 0.5  | 0.00432  | 2.36443 | 0.6850271  | 0.542196564 | 0.143  |
| cg26560699 | II | 37 | 5  | 171918659                   | 0.46 | 0.01197  | 1.92207 | 0.75409453 | 0.611413554 | 0.143  |
| cg01157650 | II | 37 | 5  | 177809164 COL23A1           | 0.54 | 0.0014   | 2.85345 | 0.64848644 | 0.505607934 | 0.143  |
| cg11191555 | II | 37 | 5  | 177895442 COL23A1           | 0.67 | 2.34E-05 | 4.63072 | 0.67042428 | 0.81338862  | -0.143 |
| cg20986887 | II | 37 | 6  | 28887284 TRIM27             | 0.5  | 0.00432  | 2.36443 | 0.4377951  | 0.580303106 | -0.143 |
| cg15708909 | II | 37 | 6  | 32487314 HLA-DRB5           | 0.46 | 0.01197  | 1.92207 | 0.52845759 | 0.671379504 | -0.143 |
| cg02835756 | II | 37 | 6  | 41442369                    | 0.58 | 0.00041  | 3.39184 | 0.72888677 | 0.585482831 | 0.143  |
| cg06840743 | II | 37 | 7  | 155150876                   | 0.42 | 0.02991  | 1.52413 | 0.56533403 | 0.708467652 | -0.143 |
| cg21919729 | I  | 37 | 8  | 11719367 CTSB;CTSB;CTSB;CT  | 0.54 | 0.0014   | 2.85345 | 0.77765192 | 0.920363501 | -0.143 |
| cg14016344 | I  | 37 | 9  | 35616726 CD72               | 0.54 | 0.0014   | 2.85345 | 0.49902318 | 0.356509115 | 0.143  |

|            |    |    |    |           |                       |      |          |         |            |             |        |
|------------|----|----|----|-----------|-----------------------|------|----------|---------|------------|-------------|--------|
| cg13672736 | I  | 37 | 9  | 135114066 | NTNG2                 | 0.42 | 0.02991  | 1.52413 | 0.90738522 | 0.764537133 | 0.143  |
| cg12037550 | II | 37 | 10 | 1705054   | ADARB2                | 0.5  | 0.00432  | 2.36443 | 0.61570955 | 0.473004516 | 0.143  |
| cg24376955 | II | 37 | 10 | 43637359  | CSGALNACT2            | 0.5  | 0.00432  | 2.36443 | 0.65996442 | 0.803133946 | -0.143 |
| cg04641860 | II | 37 | 10 | 43891547  | HNRNPF;HNRNPF;H       | 0.5  | 0.00432  | 2.36443 | 0.67867807 | 0.535659714 | 0.143  |
| cg11095743 | II | 37 | 10 | 49815243  |                       | 0.58 | 0.00041  | 3.39184 | 0.34701761 | 0.490266027 | -0.143 |
| cg14447240 | II | 37 | 10 | 134823349 |                       | 0.58 | 0.00041  | 3.39184 | 0.65852335 | 0.801592261 | -0.143 |
| cg00509007 | II | 37 | 11 | 1781557   | HCCA2;CTSD            | 0.54 | 0.0014   | 2.85345 | 0.71857677 | 0.861570506 | -0.143 |
| cg14600987 | II | 37 | 11 | 1952678   | TNNT3;TNNT3;TNN       | 0.5  | 0.00432  | 2.36443 | 0.28131968 | 0.424079934 | -0.143 |
| cg11342234 | II | 37 | 11 | 2710838   | KCNQ1;KCNQ1OT1;       | 0.46 | 0.01197  | 1.92207 | 0.50741152 | 0.364727401 | 0.143  |
| cg13859639 | II | 37 | 11 | 2846716   | KCNQ1;KCNQ1           | 0.54 | 0.0014   | 2.85345 | 0.42638394 | 0.569208207 | -0.143 |
| cg06433350 | II | 37 | 11 | 3115015   | OSBPL5;OSBPL5;OS      | 0.5  | 0.00432  | 2.36443 | 0.43236754 | 0.575723013 | -0.143 |
| cg12535280 | I  | 37 | 11 | 12399498  | PARVA                 | 0.46 | 0.01197  | 1.92207 | 0.09677733 | 0.240090792 | -0.143 |
| cg07631435 | II | 37 | 11 | 114043903 | ZBTB16;ZBTB16         | 0.54 | 0.0014   | 2.85345 | 0.5160576  | 0.372927687 | 0.143  |
| cg24951335 | II | 37 | 12 | 1609463   | LOC100292680          | 0.5  | 0.00432  | 2.36443 | 0.51052568 | 0.653380477 | -0.143 |
| cg18071202 | II | 37 | 12 | 1609470   | LOC100292680          | 0.58 | 0.00041  | 3.39184 | 0.51026963 | 0.653256094 | -0.143 |
| cg19345219 | II | 37 | 12 | 6747405   | ACRBP                 | 0.46 | 0.01197  | 1.92207 | 0.58720155 | 0.443855008 | 0.143  |
| cg04381888 | II | 37 | 12 | 48195549  | HDAC7;HDAC7           | 0.54 | 0.0014   | 2.85345 | 0.28238234 | 0.42573071  | -0.143 |
| cg12800105 | II | 37 | 12 | 121972412 | KDM2B;KDM2B           | 0.67 | 2.34E-05 | 4.63072 | 0.79853218 | 0.655774831 | 0.143  |
| cg10097313 | II | 37 | 14 | 25591076  |                       | 0.67 | 2.34E-05 | 4.63072 | 0.68771017 | 0.830472578 | -0.143 |
| cg18655522 | I  | 37 | 14 | 69424756  | ACTN1;ACTN1;ACTI      | 0.46 | 0.01197  | 1.92207 | 0.68208126 | 0.824907182 | -0.143 |
| cg07163845 | II | 37 | 14 | 106071651 |                       | 0.42 | 0.02991  | 1.52413 | 0.36412326 | 0.50694471  | -0.143 |
| cg20908276 | I  | 37 | 14 | 106134542 |                       | 0.5  | 0.00432  | 2.36443 | 0.72838393 | 0.585311049 | 0.143  |
| cg04055913 | II | 37 | 15 | 44173036  | FRMD5                 | 0.5  | 0.00432  | 2.36443 | 0.580363   | 0.437029819 | 0.143  |
| cg26510178 | I  | 37 | 16 | 728470    |                       | 0.42 | 0.02991  | 1.52413 | 0.83326708 | 0.69018199  | 0.143  |
| cg02878222 | II | 37 | 16 | 5117565   | C16orf89;C16orf89     | 0.54 | 0.0014   | 2.85345 | 0.81307049 | 0.670181298 | 0.143  |
| cg06897661 | I  | 37 | 16 | 50322074  | ADCY7;ADCY7           | 0.58 | 0.00041  | 3.39184 | 0.73263108 | 0.875975204 | -0.143 |
| cg26946015 | II | 37 | 16 | 66178419  |                       | 0.54 | 0.0014   | 2.85345 | 0.80574943 | 0.662823952 | 0.143  |
| cg00036723 | II | 37 | 17 | 32688878  | CCL1                  | 0.5  | 0.00432  | 2.36443 | 0.39279013 | 0.249718802 | 0.143  |
| cg08329754 | II | 37 | 17 | 78797015  | RPTOR;RPTOR           | 0.42 | 0.02991  | 1.52413 | 0.71643651 | 0.859428557 | -0.143 |
| cg27316369 | II | 37 | 17 | 79799376  |                       | 0.54 | 0.0014   | 2.85345 | 0.62413585 | 0.766707507 | -0.143 |
| cg10356204 | II | 37 | 19 | 2255744   | JSRP1                 | 0.42 | 0.02991  | 1.52413 | 0.46176853 | 0.3192465   | 0.143  |
| cg05343021 | II | 37 | 19 | 10773698  | ILF3;ILF3;ILF3;ILF3;I | 0.54 | 0.0014   | 2.85345 | 0.47788778 | 0.335057397 | 0.143  |
| cg22676000 | II | 37 | 19 | 42259081  | CEACAM6               | 0.46 | 0.01197  | 1.92207 | 0.68733538 | 0.54454869  | 0.143  |

|            |    |    |    |                            |      |          |         |            |             |        |
|------------|----|----|----|----------------------------|------|----------|---------|------------|-------------|--------|
| cg18687314 | II | 37 | 20 | 43733672                   | 0.58 | 0.00041  | 3.39184 | 0.74198828 | 0.59870641  | 0.143  |
| cg21723559 | II | 37 | 20 | 44048174 PIGT              | 0.46 | 0.01197  | 1.92207 | 0.78265505 | 0.640145799 | 0.143  |
| cg18468842 | II | 37 | 20 | 45313109 TP53RK;SLC13A3    | 0.42 | 0.02991  | 1.52413 | 0.49895509 | 0.64192835  | -0.143 |
| cg06893362 | II | 37 | 20 | 47897124 C20orf199;C20orf1 | 0.46 | 0.01197  | 1.92207 | 0.73472968 | 0.59197319  | 0.143  |
| cg07900444 | II | 37 | 21 | 46419208 NCRNA00162        | 0.5  | 0.00432  | 2.36443 | 0.34788742 | 0.20489088  | 0.143  |
| cg08474826 | II | 37 | 1  | 1099630                    | 0.42 | 0.02991  | 1.52413 | 0.58793607 | 0.446153689 | 0.142  |
| cg22862319 | II | 37 | 1  | 3289994 PRDM16;PRDM16      | 0.5  | 0.00432  | 2.36443 | 0.64219328 | 0.499987207 | 0.142  |
| cg20305595 | II | 37 | 1  | 9293833 H6PD               | 0.58 | 0.00041  | 3.39184 | 0.5049975  | 0.646520871 | -0.142 |
| cg21385052 | II | 37 | 1  | 149903249 MTMR11;MTMR11    | 0.58 | 0.00041  | 3.39184 | 0.76602174 | 0.90771596  | -0.142 |
| cg06355720 | II | 37 | 1  | 153333350 S100A9           | 0.5  | 0.00432  | 2.36443 | 0.5113437  | 0.653642631 | -0.142 |
| cg13765621 | II | 37 | 1  | 158149228 CD1D             | 0.46 | 0.01197  | 1.92207 | 0.28701694 | 0.429056379 | -0.142 |
| cg17250262 | II | 37 | 2  | 30457110 LBH               | 0.62 | 0.0001   | 3.98291 | 0.46943592 | 0.327409328 | 0.142  |
| cg09154591 | II | 37 | 2  | 36923828 VIT               | 0.42 | 0.02991  | 1.52413 | 0.65775403 | 0.799597417 | -0.142 |
| cg02541444 | II | 37 | 2  | 37996000                   | 0.67 | 2.34E-05 | 4.63072 | 0.58103719 | 0.722989228 | -0.142 |
| cg26775087 | I  | 37 | 3  | 15382808 SH3BP5;SH3BP5     | 0.5  | 0.00432  | 2.36443 | 0.79664095 | 0.654817099 | 0.142  |
| cg03461641 | II | 37 | 4  | 26454190                   | 0.42 | 0.02991  | 1.52413 | 0.88613833 | 0.743757348 | 0.142  |
| cg07516556 | II | 37 | 5  | 1475096 LPCAT1             | 0.42 | 0.02991  | 1.52413 | 0.68094052 | 0.823391925 | -0.142 |
| cg05134426 | II | 37 | 5  | 124080479 ZNF608           | 0.5  | 0.00432  | 2.36443 | 0.7374601  | 0.595742812 | 0.142  |
| cg11010552 | II | 37 | 5  | 131338478 ACSL6;ACSL6      | 0.62 | 0.0001   | 3.98291 | 0.51378196 | 0.655386963 | -0.142 |
| cg05201300 | II | 37 | 5  | 172443740 ATP6VOE1         | 0.5  | 0.00432  | 2.36443 | 0.6109755  | 0.752728007 | -0.142 |
| cg10500084 | II | 37 | 5  | 174172044                  | 0.5  | 0.00432  | 2.36443 | 0.73102693 | 0.589473491 | 0.142  |
| cg02979839 | II | 37 | 5  | 176957063 FAM193B;FAM193I  | 0.58 | 0.00041  | 3.39184 | 0.72025726 | 0.862030481 | -0.142 |
| cg14622996 | II | 37 | 6  | 32109801                   | 0.54 | 0.0014   | 2.85345 | 0.37497364 | 0.517397788 | -0.142 |
| cg00115458 | I  | 37 | 6  | 33141305 COL11A2;COL11A2;  | 0.54 | 0.0014   | 2.85345 | 0.34776314 | 0.205272313 | 0.142  |
| cg01063280 | II | 37 | 6  | 108167599                  | 0.54 | 0.0014   | 2.85345 | 0.64442427 | 0.786137887 | -0.142 |
| cg21143896 | I  | 37 | 7  | 2802374 GNA12              | 0.67 | 2.34E-05 | 4.63072 | 0.63058792 | 0.772451763 | -0.142 |
| cg12091331 | II | 37 | 8  | 42065314 PLAT;PLAT         | 0.58 | 0.00041  | 3.39184 | 0.50432874 | 0.646023532 | -0.142 |
| cg19991046 | II | 37 | 8  | 142183677 DENND3           | 0.5  | 0.00432  | 2.36443 | 0.44656372 | 0.588095942 | -0.142 |
| cg08267399 | II | 37 | 8  | 142349160 LOC731779        | 0.58 | 0.00041  | 3.39184 | 0.53886396 | 0.396929257 | 0.142  |
| cg13580827 | II | 37 | 9  | 72081155 APBA1             | 0.54 | 0.0014   | 2.85345 | 0.72245447 | 0.580601124 | 0.142  |
| cg13931640 | I  | 37 | 9  | 137277819 RXRA             | 0.5  | 0.00432  | 2.36443 | 0.52216759 | 0.664297387 | -0.142 |
| cg00972313 | I  | 37 | 10 | 1531243 ADARB2             | 0.54 | 0.0014   | 2.85345 | 0.57553422 | 0.433912063 | 0.142  |
| cg27099293 | II | 37 | 10 | 71895572                   | 0.54 | 0.0014   | 2.85345 | 0.70633919 | 0.848318202 | -0.142 |

|            |    |    |    |                             |      |          |         |            |             |        |
|------------|----|----|----|-----------------------------|------|----------|---------|------------|-------------|--------|
| cg18614702 | II | 37 | 10 | 72215990                    | 0.58 | 0.00041  | 3.39184 | 0.57016233 | 0.712503777 | -0.142 |
| cg24437408 | I  | 37 | 10 | 134661502                   | 0.71 | 4.57E-06 | 5.34042 | 0.391211   | 0.248957554 | 0.142  |
| cg25327296 | II | 37 | 11 | 44927093 TSPAN18;TSPAN18    | 0.5  | 0.00432  | 2.36443 | 0.69013997 | 0.547855466 | 0.142  |
| cg02713832 | II | 37 | 11 | 60772559 CD6                | 0.46 | 0.01197  | 1.92207 | 0.60761506 | 0.465261461 | 0.142  |
| cg08450021 | II | 37 | 11 | 111101517                   | 0.5  | 0.00432  | 2.36443 | 0.50986384 | 0.36825072  | 0.142  |
| cg22434506 | I  | 37 | 12 | 6657818 IFFO1;IFFO1;IFFO1   | 0.62 | 0.0001   | 3.98291 | 0.80560389 | 0.947948911 | -0.142 |
| cg04061752 | II | 37 | 12 | 19350090 PLEKHA5;PLEKHA5    | 0.42 | 0.02991  | 1.52413 | 0.2620776  | 0.403956405 | -0.142 |
| cg23378033 | II | 37 | 12 | 65672031 MSRB3;MSRB3        | 0.5  | 0.00432  | 2.36443 | 0.18812808 | 0.329724622 | -0.142 |
| cg14486477 | II | 37 | 12 | 117256672 RNFT2;RNFT2       | 0.62 | 0.0001   | 3.98291 | 0.34696511 | 0.205026813 | 0.142  |
| cg12421110 | II | 37 | 13 | 42035731 C13orf15           | 0.62 | 0.0001   | 3.98291 | 0.77606717 | 0.634403067 | 0.142  |
| cg21836117 | II | 37 | 14 | 73012519 RGS6               | 0.46 | 0.01197  | 1.92207 | 0.52522031 | 0.382984529 | 0.142  |
| cg13614617 | II | 37 | 15 | 65656635 IGDCC3             | 0.54 | 0.0014   | 2.85345 | 0.75622018 | 0.614560934 | 0.142  |
| cg05412396 | II | 37 | 15 | 76631569 ISL2               | 0.46 | 0.01197  | 1.92207 | 0.27937371 | 0.421132501 | -0.142 |
| cg19293468 | I  | 37 | 17 | 1973400 SMG6;SMG6           | 0.42 | 0.02991  | 1.52413 | 0.72165195 | 0.579332257 | 0.142  |
| cg23399011 | II | 37 | 17 | 10742274 PIRT               | 0.5  | 0.00432  | 2.36443 | 0.6989663  | 0.55701443  | 0.142  |
| cg16047279 | I  | 37 | 17 | 38717242 CCR7               | 0.58 | 0.00041  | 3.39184 | 0.20626715 | 0.0645367   | 0.142  |
| cg19003337 | I  | 37 | 17 | 39780836 KRT17;KRT17        | 0.42 | 0.02991  | 1.52413 | 0.40153157 | 0.543374169 | -0.142 |
| cg11669285 | II | 37 | 17 | 40558061 PTRF               | 0.71 | 4.57E-06 | 5.34042 | 0.6370215  | 0.778535841 | -0.142 |
| cg08817507 | I  | 37 | 17 | 79924068                    | 0.46 | 0.01197  | 1.92207 | 0.6730531  | 0.530988145 | 0.142  |
| cg27400313 | I  | 37 | 18 | 74824280 MBP;MBP            | 0.46 | 0.01197  | 1.92207 | 0.6065854  | 0.74849436  | -0.142 |
| cg08432509 | II | 37 | 20 | 62317768 RTEL1;RTEL1        | 0.58 | 0.00041  | 3.39184 | 0.59364392 | 0.735537978 | -0.142 |
| cg00334274 | II | 37 | 22 | 30474915                    | 0.5  | 0.00432  | 2.36443 | 0.67927386 | 0.537104752 | 0.142  |
| cg24296621 | II | 37 | 1  | 1444995                     | 0.75 | 7.61E-07 | 6.11857 | 0.33340302 | 0.47462278  | -0.141 |
| cg22226775 | II | 37 | 1  | 3008033 PRDM16;PRDM16       | 0.46 | 0.01197  | 1.92207 | 0.70533412 | 0.564674043 | 0.141  |
| cg08129092 | II | 37 | 1  | 153746211 INTS3             | 0.46 | 0.01197  | 1.92207 | 0.26499188 | 0.405955553 | -0.141 |
| cg12617080 | II | 37 | 1  | 156509844 IQGAP3            | 0.54 | 0.0014   | 2.85345 | 0.28012699 | 0.421101344 | -0.141 |
| cg17100176 | II | 37 | 1  | 207096358 FAIM3;FAIM3;FAIM  | 0.62 | 0.0001   | 3.98291 | 0.46427869 | 0.323464945 | 0.141  |
| cg06966462 | II | 37 | 2  | 9612807 CPSF3               | 0.67 | 2.34E-05 | 4.63072 | 0.74853084 | 0.607834556 | 0.141  |
| cg02431562 | II | 37 | 2  | 96809970 DUSP2              | 0.5  | 0.00432  | 2.36443 | 0.64203283 | 0.50065111  | 0.141  |
| cg24777399 | II | 37 | 2  | 109855574 SH3RF3            | 0.46 | 0.01197  | 1.92207 | 0.30893941 | 0.449856307 | -0.141 |
| cg02930866 | II | 37 | 3  | 15482580 EAF1               | 0.46 | 0.01197  | 1.92207 | 0.22769825 | 0.369146087 | -0.141 |
| cg20540428 | II | 37 | 3  | 73045686 PPP4R2             | 0.46 | 0.01197  | 1.92207 | 0.42283454 | 0.563504028 | -0.141 |
| cg25574175 | II | 37 | 3  | 119500929 NR1I2;NR1I2;NR1I2 | 0.5  | 0.00432  | 2.36443 | 0.7284315  | 0.869645092 | -0.141 |

|            |    |    |    |           |                    |      |          |         |            |             |        |
|------------|----|----|----|-----------|--------------------|------|----------|---------|------------|-------------|--------|
| cg16322565 | II | 37 | 3  | 119526221 | NR1I2;NR1I2;NR1I2  | 0.54 | 0.0014   | 2.85345 | 0.56615219 | 0.707048345 | -0.141 |
| cg12146673 | I  | 37 | 3  | 187387555 | SST                | 0.46 | 0.01197  | 1.92207 | 0.22717436 | 0.367931005 | -0.141 |
| cg25646029 | II | 37 | 5  | 139584772 | C5orf32            | 0.67 | 2.34E-05 | 4.63072 | 0.65703518 | 0.798517195 | -0.141 |
| cg21242144 | II | 37 | 5  | 148808487 | LOC728264;MIR145   | 0.58 | 0.00041  | 3.39184 | 0.362593   | 0.504073237 | -0.141 |
| cg08537847 | I  | 37 | 5  | 148810203 | MIR145;LOC728264   | 0.5  | 0.00432  | 2.36443 | 0.7767525  | 0.917381292 | -0.141 |
| cg01676996 | I  | 37 | 6  | 30619167  | C6orf136;C6orf136  | 0.46 | 0.01197  | 1.92207 | 0.72989059 | 0.589105248 | 0.141  |
| cg16176069 | II | 37 | 7  | 1062784   | C7orf50;MIR339;C7  | 0.42 | 0.02991  | 1.52413 | 0.50676474 | 0.365522331 | 0.141  |
| cg23593387 | II | 37 | 7  | 1864317   | MAD1L1;MAD1L1;M    | 0.5  | 0.00432  | 2.36443 | 0.71510912 | 0.574083742 | 0.141  |
| cg15896696 | I  | 37 | 7  | 2059921   | MAD1L1;MAD1L1;M    | 0.42 | 0.02991  | 1.52413 | 0.17778351 | 0.318749985 | -0.141 |
| cg26369382 | II | 37 | 7  | 100240341 | TFR2               | 0.42 | 0.02991  | 1.52413 | 0.73367818 | 0.593110488 | 0.141  |
| cg07886914 | II | 37 | 8  | 28198639  | PNOC               | 0.5  | 0.00432  | 2.36443 | 0.77871976 | 0.637338757 | 0.141  |
| cg07205823 | II | 37 | 8  | 49229620  |                    | 0.54 | 0.0014   | 2.85345 | 0.68155444 | 0.540349011 | 0.141  |
| cg17207736 | II | 37 | 8  | 142237307 | SLC45A4            | 0.54 | 0.0014   | 2.85345 | 0.51872212 | 0.659317537 | -0.141 |
| cg14604066 | I  | 37 | 9  | 139590572 |                    | 0.46 | 0.01197  | 1.92207 | 0.62895745 | 0.487674884 | 0.141  |
| cg11189134 | II | 37 | 10 | 1531498   | ADARB2             | 0.5  | 0.00432  | 2.36443 | 0.50467022 | 0.363704458 | 0.141  |
| cg25368482 | I  | 37 | 10 | 47653939  |                    | 0.5  | 0.00432  | 2.36443 | 0.08542207 | 0.225996951 | -0.141 |
| cg17389077 | II | 37 | 10 | 128810904 | DOCK1              | 0.5  | 0.00432  | 2.36443 | 0.39315047 | 0.534077469 | -0.141 |
| cg09983885 | II | 37 | 11 | 4415245   | TRIM21             | 0.58 | 0.00041  | 3.39184 | 0.3566267  | 0.497590991 | -0.141 |
| cg08202743 | II | 37 | 11 | 34182570  | ABTB2              | 0.42 | 0.02991  | 1.52413 | 0.68315737 | 0.54263756  | 0.141  |
| cg05481452 | II | 37 | 11 | 61717684  | BEST1;BEST1;BEST1  | 0.62 | 0.0001   | 3.98291 | 0.7050347  | 0.563869087 | 0.141  |
| cg23695131 | I  | 37 | 11 | 94642928  |                    | 0.62 | 0.0001   | 3.98291 | 0.69371451 | 0.834914765 | -0.141 |
| cg04362096 | II | 37 | 11 | 123016010 | ASAM               | 0.46 | 0.01197  | 1.92207 | 0.39308271 | 0.533882787 | -0.141 |
| cg13298466 | II | 37 | 12 | 6658164   | IFFO1;IFFO1;IFFO1; | 0.5  | 0.00432  | 2.36443 | 0.65577567 | 0.797271637 | -0.141 |
| cg02564061 | II | 37 | 12 | 49998963  | FAM186B;FAM186B    | 0.5  | 0.00432  | 2.36443 | 0.47213683 | 0.613111819 | -0.141 |
| cg24260327 | II | 37 | 12 | 125023590 |                    | 0.62 | 0.0001   | 3.98291 | 0.58742511 | 0.728831281 | -0.141 |
| cg01663970 | II | 37 | 12 | 125299686 | SCARB1;SCARB1      | 0.67 | 2.34E-05 | 4.63072 | 0.75914674 | 0.900577052 | -0.141 |
| cg02088785 | II | 37 | 13 | 99223336  | STK24              | 0.54 | 0.0014   | 2.85345 | 0.55284915 | 0.411653974 | 0.141  |
| cg10197238 | II | 37 | 14 | 21269744  | RNASE1;RNASE1;RN   | 0.58 | 0.00041  | 3.39184 | 0.3106722  | 0.4521467   | -0.141 |
| cg23092040 | II | 37 | 14 | 65068504  |                    | 0.67 | 2.34E-05 | 4.63072 | 0.45381411 | 0.594483725 | -0.141 |
| cg01498829 | II | 37 | 14 | 100608798 | EVL                | 0.58 | 0.00041  | 3.39184 | 0.59369866 | 0.734289665 | -0.141 |
| cg05873568 | II | 37 | 14 | 105155145 | INF2;INF2;INF2     | 0.54 | 0.0014   | 2.85345 | 0.23806857 | 0.379018477 | -0.141 |
| cg17383853 | II | 37 | 15 | 63166381  |                    | 0.5  | 0.00432  | 2.36443 | 0.7086558  | 0.56717242  | 0.141  |
| cg22513955 | II | 37 | 17 | 1665123   | SERPINF1           | 0.46 | 0.01197  | 1.92207 | 0.52103579 | 0.662517367 | -0.141 |

|            |    |    |    |                             |      |          |         |            |             |        |
|------------|----|----|----|-----------------------------|------|----------|---------|------------|-------------|--------|
| cg01346501 | II | 37 | 17 | 38254714 NR1D1              | 0.54 | 0.0014   | 2.85345 | 0.29962757 | 0.44048134  | -0.141 |
| cg07787614 | II | 37 | 17 | 76037364 TNRC6C;TNRC6C      | 0.42 | 0.02991  | 1.52413 | 0.434284   | 0.575241094 | -0.141 |
| cg23508887 | II | 37 | 18 | 13502053 C18orf1;C18orf1    | 0.5  | 0.00432  | 2.36443 | 0.81250704 | 0.671820481 | 0.141  |
| cg25389087 | II | 37 | 18 | 74824413 MBP;MBP            | 0.58 | 0.00041  | 3.39184 | 0.51445871 | 0.655216015 | -0.141 |
| cg25960854 | II | 37 | 19 | 1160184 SBNO2               | 0.58 | 0.00041  | 3.39184 | 0.5874781  | 0.728449318 | -0.141 |
| cg21062760 | II | 37 | 19 | 36205574 ZBTB32             | 0.58 | 0.00041  | 3.39184 | 0.63253154 | 0.491445669 | 0.141  |
| cg06484123 | II | 37 | 19 | 53107200                    | 0.67 | 2.34E-05 | 4.63072 | 0.7613705  | 0.902143717 | -0.141 |
| cg24368848 | I  | 37 | 19 | 58545160 ZSCAN1             | 0.58 | 0.00041  | 3.39184 | 0.07066923 | 0.211366273 | -0.141 |
| cg20177522 | II | 37 | 20 | 62410437 ZBTB46             | 0.5  | 0.00432  | 2.36443 | 0.62320581 | 0.764352301 | -0.141 |
| cg15683970 | II | 37 | 21 | 35747081 FAM165B            | 0.54 | 0.0014   | 2.85345 | 0.32876183 | 0.469971943 | -0.141 |
| cg10142237 | II | 37 | 22 | 38714395 CSNK1E;CSNK1E      | 0.5  | 0.00432  | 2.36443 | 0.38907559 | 0.530098475 | -0.141 |
| cg25201541 | II | 37 | 1  | 1444416                     | 0.75 | 7.61E-07 | 6.11857 | 0.46995506 | 0.610340059 | -0.14  |
| cg07813851 | II | 37 | 1  | 7466976 CAMTA1              | 0.5  | 0.00432  | 2.36443 | 0.83253951 | 0.692476256 | 0.14   |
| cg08922729 | II | 37 | 1  | 21913557                    | 0.58 | 0.00041  | 3.39184 | 0.49011584 | 0.630137612 | -0.14  |
| cg07191152 | II | 37 | 1  | 25061987                    | 0.46 | 0.01197  | 1.92207 | 0.64870336 | 0.509150411 | 0.14   |
| cg03654504 | II | 37 | 1  | 37495105 GRIK3              | 0.46 | 0.01197  | 1.92207 | 0.47052727 | 0.330182885 | 0.14   |
| cg15925478 | II | 37 | 1  | 94081080 BCAR3              | 0.5  | 0.00432  | 2.36443 | 0.60637656 | 0.466575458 | 0.14   |
| cg24406771 | II | 37 | 1  | 229002047                   | 0.46 | 0.01197  | 1.92207 | 0.75670416 | 0.616381504 | 0.14   |
| cg22222999 | II | 37 | 1  | 234894712                   | 0.46 | 0.01197  | 1.92207 | 0.39458696 | 0.53440611  | -0.14  |
| cg23859635 | II | 37 | 2  | 42795262 MTA3               | 0.42 | 0.02991  | 1.52413 | 0.65677048 | 0.517191265 | 0.14   |
| cg19805943 | II | 37 | 2  | 85933069                    | 0.54 | 0.0014   | 2.85345 | 0.70825134 | 0.848185172 | -0.14  |
| cg19043574 | II | 37 | 2  | 99439533 C2orf55            | 0.42 | 0.02991  | 1.52413 | 0.13632755 | 0.275928093 | -0.14  |
| cg05870586 | II | 37 | 2  | 240196769 HDAC4             | 0.46 | 0.01197  | 1.92207 | 0.41121364 | 0.550980595 | -0.14  |
| cg18861762 | II | 37 | 2  | 242127852 ANO7;ANO7         | 0.46 | 0.01197  | 1.92207 | 0.69886357 | 0.558926574 | 0.14   |
| cg27275023 | II | 37 | 3  | 107676222                   | 0.62 | 0.0001   | 3.98291 | 0.74128477 | 0.881053139 | -0.14  |
| cg07262457 | II | 37 | 3  | 128777371                   | 0.5  | 0.00432  | 2.36443 | 0.48898046 | 0.348884447 | 0.14   |
| cg14313576 | II | 37 | 3  | 134339988 KY                | 0.5  | 0.00432  | 2.36443 | 0.76649978 | 0.626825694 | 0.14   |
| cg01135648 | II | 37 | 4  | 41983611 DCAF4L1            | 0.62 | 0.0001   | 3.98291 | 0.73755559 | 0.877270045 | -0.14  |
| cg24020152 | II | 37 | 4  | 154419554 KIAA0922;KIAA0922 | 0.42 | 0.02991  | 1.52413 | 0.79601829 | 0.65609222  | 0.14   |
| cg10902033 | II | 37 | 5  | 471171 LOC25845             | 0.54 | 0.0014   | 2.85345 | 0.64662845 | 0.506963263 | 0.14   |
| cg11042320 | II | 37 | 5  | 149534497 PDGFRB            | 0.42 | 0.02991  | 1.52413 | 0.60702736 | 0.467051365 | 0.14   |
| cg11334730 | II | 37 | 6  | 6750455                     | 0.54 | 0.0014   | 2.85345 | 0.40894291 | 0.549154801 | -0.14  |
| cg06315208 | II | 37 | 6  | 30684406 MDC1               | 0.42 | 0.02991  | 1.52413 | 0.72180437 | 0.581569244 | 0.14   |

|            |    |    |    |           |                  |      |          |         |            |             |       |
|------------|----|----|----|-----------|------------------|------|----------|---------|------------|-------------|-------|
| cg17152981 | II | 37 | 6  | 110299835 | GPR6             | 0.54 | 0.0014   | 2.85345 | 0.32079311 | 0.460979082 | -0.14 |
| cg09865593 | II | 37 | 7  | 645796    | PRKAR1B;PRKAR1B  | 0.46 | 0.01197  | 1.92207 | 0.66654285 | 0.807037216 | -0.14 |
| cg00749672 | II | 37 | 7  | 26437192  |                  | 0.42 | 0.02991  | 1.52413 | 0.54552787 | 0.685033311 | -0.14 |
| cg08641579 | I  | 37 | 7  | 79083447  | MAGI2            | 0.46 | 0.01197  | 1.92207 | 0.11663312 | 0.256507278 | -0.14 |
| cg17701146 | I  | 37 | 7  | 157387361 | PTPRN2;PTPRN2;PT | 0.5  | 0.00432  | 2.36443 | 0.78285241 | 0.643293899 | 0.14  |
| cg09050832 | II | 37 | 8  | 1365175   |                  | 0.46 | 0.01197  | 1.92207 | 0.55237412 | 0.692361303 | -0.14 |
| cg06895124 | II | 37 | 8  | 141588750 | EIF2C2;EIF2C2    | 0.58 | 0.00041  | 3.39184 | 0.6670696  | 0.807420051 | -0.14 |
| cg04124606 | I  | 37 | 8  | 142095021 |                  | 0.5  | 0.00496  | 2.30474 | 0.29261184 | 0.432116386 | -0.14 |
| cg25392060 | II | 37 | 8  | 142297121 |                  | 0.46 | 0.01197  | 1.92207 | 0.41968216 | 0.559632095 | -0.14 |
| cg06894628 | I  | 37 | 8  | 143822543 | SLURP1           | 0.71 | 4.57E-06 | 5.34042 | 0.66270385 | 0.523156386 | 0.14  |
| cg14221252 | II | 37 | 9  | 139589413 |                  | 0.58 | 0.00041  | 3.39184 | 0.64123842 | 0.781311252 | -0.14 |
| cg00932063 | II | 37 | 10 | 126234138 | LHPP;LHPP        | 0.62 | 0.0001   | 3.98291 | 0.46890832 | 0.32906994  | 0.14  |
| cg07918545 | II | 37 | 10 | 129535669 | FOXI2            | 0.58 | 0.00041  | 3.39184 | 0.12588123 | 0.266309654 | -0.14 |
| cg03402926 | II | 37 | 11 | 27340767  |                  | 0.58 | 0.00041  | 3.39184 | 0.69956179 | 0.559414784 | 0.14  |
| cg01240599 | I  | 37 | 11 | 67418045  | ACY3             | 0.46 | 0.01197  | 1.92207 | 0.25727535 | 0.117033    | 0.14  |
| cg15104126 | II | 37 | 12 | 6150167   | VWF              | 0.58 | 0.00041  | 3.39184 | 0.67201866 | 0.811733288 | -0.14 |
| cg16642299 | II | 37 | 12 | 7071383   | MIR200C          | 0.46 | 0.01197  | 1.92207 | 0.24736473 | 0.386936269 | -0.14 |
| cg14872454 | II | 37 | 12 | 54685301  |                  | 0.54 | 0.0014   | 2.85345 | 0.66617601 | 0.806423091 | -0.14 |
| cg02580045 | II | 37 | 12 | 110449223 | ANKRD13A         | 0.42 | 0.02991  | 1.52413 | 0.73791072 | 0.597986201 | 0.14  |
| cg07744430 | II | 37 | 12 | 132345502 |                  | 0.54 | 0.0014   | 2.85345 | 0.45863944 | 0.599010981 | -0.14 |
| cg27506442 | II | 37 | 13 | 30948716  | LOC100188949     | 0.54 | 0.0014   | 2.85345 | 0.20245202 | 0.062639776 | 0.14  |
| cg14214797 | II | 37 | 14 | 91860613  | CCDC88C          | 0.5  | 0.00432  | 2.36443 | 0.71623107 | 0.576566167 | 0.14  |
| cg26188131 | I  | 37 | 14 | 106095796 |                  | 0.71 | 4.57E-06 | 5.34042 | 0.86568525 | 0.72549644  | 0.14  |
| cg24184689 | II | 37 | 15 | 74723271  | SEMA7A;SEMA7A;S  | 0.46 | 0.01197  | 1.92207 | 0.67364328 | 0.53395122  | 0.14  |
| cg03905718 | II | 37 | 16 | 4289417   | SRL              | 0.58 | 0.00041  | 3.39184 | 0.52136695 | 0.661341791 | -0.14 |
| cg18219562 | II | 37 | 17 | 41773643  |                  | 0.54 | 0.0014   | 2.85345 | 0.66118759 | 0.801355874 | -0.14 |
| cg20433386 | II | 37 | 17 | 48702158  | CACNA1G;CACNA1G  | 0.54 | 0.0014   | 2.85345 | 0.37888106 | 0.519128792 | -0.14 |
| cg08314949 | II | 37 | 17 | 78851213  | RPTOR;RPTOR      | 0.46 | 0.01197  | 1.92207 | 0.51512381 | 0.375157882 | 0.14  |
| cg03624195 | I  | 37 | 19 | 14090310  | RFX1             | 0.54 | 0.0014   | 2.85345 | 0.28867105 | 0.428370431 | -0.14 |
| cg00540464 | II | 37 | 19 | 16655751  |                  | 0.54 | 0.0014   | 2.85345 | 0.83842455 | 0.698912809 | 0.14  |
| cg07418126 | II | 37 | 19 | 49838101  | CD37;CD37        | 0.5  | 0.00432  | 2.36443 | 0.60758721 | 0.467716908 | 0.14  |
| cg01966791 | I  | 37 | 20 | 62572875  | MIR1914;UCKL1    | 0.42 | 0.02991  | 1.52413 | 0.33540757 | 0.475460251 | -0.14 |
| cg04723534 | II | 37 | 21 | 43373136  | C2CD2            | 0.54 | 0.0014   | 2.85345 | 0.26995185 | 0.410235767 | -0.14 |

|            |    |    |    |           |                   |      |          |         |            |             |        |
|------------|----|----|----|-----------|-------------------|------|----------|---------|------------|-------------|--------|
| cg06501716 | II | 37 | 22 | 19436948  | C22orf39;C22orf39 | 0.42 | 0.02991  | 1.52413 | 0.69761337 | 0.557345456 | 0.14   |
| cg05580073 | II | 37 | 22 | 24803248  | CYTSA;CYTSA       | 0.5  | 0.00432  | 2.36443 | 0.30592441 | 0.445492702 | -0.14  |
| cg10096929 | I  | 37 | 1  | 156261403 | TMEM79;TMEM79     | 0.42 | 0.02991  | 1.52413 | 0.35935301 | 0.497888802 | -0.139 |
| cg00152117 | II | 37 | 1  | 156928845 | ARHGEF11;ARHGEF   | 0.5  | 0.00432  | 2.36443 | 0.67242631 | 0.533168415 | 0.139  |
| cg21400549 | II | 37 | 1  | 212588848 | TMEM206           | 0.42 | 0.02991  | 1.52413 | 0.33983497 | 0.479000479 | -0.139 |
| cg22350835 | I  | 37 | 2  | 1868857   | MYT1L             | 0.42 | 0.02991  | 1.52413 | 0.41341034 | 0.274811968 | 0.139  |
| cg22495058 | II | 37 | 2  | 11752373  | GREB1             | 0.54 | 0.0014   | 2.85345 | 0.22664763 | 0.366014851 | -0.139 |
| cg27426835 | II | 37 | 2  | 19963298  |                   | 0.5  | 0.00432  | 2.36443 | 0.60401879 | 0.464925589 | 0.139  |
| cg15440661 | II | 37 | 2  | 43395871  |                   | 0.42 | 0.02991  | 1.52413 | 0.50309873 | 0.642455259 | -0.139 |
| cg20460227 | II | 37 | 2  | 120452632 |                   | 0.5  | 0.00432  | 2.36443 | 0.50244546 | 0.641196092 | -0.139 |
| cg21214743 | II | 37 | 2  | 130481001 |                   | 0.58 | 0.00041  | 3.39184 | 0.79567234 | 0.656277673 | 0.139  |
| cg00786685 | II | 37 | 2  | 218842585 |                   | 0.5  | 0.00432  | 2.36443 | 0.71153048 | 0.572421415 | 0.139  |
| cg07071449 | II | 37 | 2  | 238777806 | RAMP1             | 0.42 | 0.02991  | 1.52413 | 0.80530535 | 0.666433472 | 0.139  |
| cg21861151 | II | 37 | 2  | 239478365 |                   | 0.54 | 0.0014   | 2.85345 | 0.49324505 | 0.63204928  | -0.139 |
| cg24231380 | I  | 37 | 2  | 242813914 | C2orf85           | 0.5  | 0.00432  | 2.36443 | 0.70271703 | 0.563378583 | 0.139  |
| cg21442998 | I  | 37 | 3  | 11597936  | VGLL4;ATG7;VGLL4  | 0.54 | 0.0014   | 2.85345 | 0.5550958  | 0.694391041 | -0.139 |
| cg11902408 | II | 37 | 3  | 14859299  | FGD5              | 0.5  | 0.00432  | 2.36443 | 0.75278201 | 0.614260798 | 0.139  |
| cg12424624 | II | 37 | 3  | 46718941  | ALS2CL;ALS2CL     | 0.67 | 2.34E-05 | 4.63072 | 0.72302493 | 0.86245545  | -0.139 |
| cg04208434 | II | 37 | 3  | 129513427 | TMCC1;TMCC1       | 0.5  | 0.00432  | 2.36443 | 0.14225517 | 0.281208529 | -0.139 |
| cg05827190 | II | 37 | 4  | 681440    | MFSD7             | 0.62 | 0.0001   | 3.98291 | 0.60139402 | 0.740442631 | -0.139 |
| cg19277389 | II | 37 | 4  | 7802545   | AFAP1;AFAP1       | 0.46 | 0.01197  | 1.92207 | 0.79626706 | 0.656970315 | 0.139  |
| cg05497253 | II | 37 | 5  | 77830465  | LHFPL2            | 0.5  | 0.00432  | 2.36443 | 0.6869429  | 0.826315429 | -0.139 |
| cg13667243 | I  | 37 | 5  | 157001561 | ADAM19            | 0.67 | 2.34E-05 | 4.63072 | 0.53684295 | 0.397469441 | 0.139  |
| cg11092486 | II | 37 | 6  | 5087604   |                   | 0.42 | 0.02991  | 1.52413 | 0.548107   | 0.686786604 | -0.139 |
| cg16867657 | I  | 37 | 6  | 11044877  | ELOVL2            | 0.5  | 0.00432  | 2.36443 | 0.5966626  | 0.735194366 | -0.139 |
| cg08421910 | II | 37 | 6  | 11771840  | C6orf105;C6orf105 | 0.46 | 0.01197  | 1.92207 | 0.7401121  | 0.879377459 | -0.139 |
| cg08766762 | II | 37 | 6  | 37521698  |                   | 0.67 | 2.34E-05 | 4.63072 | 0.80693274 | 0.667580058 | 0.139  |
| cg27184438 | II | 37 | 7  | 4690819   |                   | 0.42 | 0.02991  | 1.52413 | 0.80548047 | 0.666903695 | 0.139  |
| cg07103517 | II | 37 | 7  | 50348485  | IKZF1             | 0.54 | 0.0014   | 2.85345 | 0.61364016 | 0.474921378 | 0.139  |
| cg16548840 | II | 37 | 7  | 56149441  | PHKG1             | 0.58 | 0.00041  | 3.39184 | 0.67389261 | 0.812854074 | -0.139 |
| cg14080050 | II | 37 | 9  | 33159025  | B4GALT1           | 0.54 | 0.0014   | 2.85345 | 0.26147831 | 0.400412088 | -0.139 |
| cg13717350 | II | 37 | 9  | 136566991 | SARDH;SARDH       | 0.42 | 0.02991  | 1.52413 | 0.50574425 | 0.366359991 | 0.139  |
| cg23459363 | II | 37 | 10 | 115033723 |                   | 0.5  | 0.00432  | 2.36443 | 0.48802587 | 0.627178089 | -0.139 |

|            |    |    |    |           |                   |      |          |         |            |             |        |
|------------|----|----|----|-----------|-------------------|------|----------|---------|------------|-------------|--------|
| cg20345915 | I  | 37 | 10 | 121296042 | RGS10;RGS10;RGS1  | 0.58 | 0.00041  | 3.39184 | 0.70430056 | 0.843188167 | -0.139 |
| cg24181174 | II | 37 | 10 | 123900861 | TACC2;TACC2       | 0.58 | 0.00041  | 3.39184 | 0.40623735 | 0.545362192 | -0.139 |
| cg26388730 | II | 37 | 11 | 64405764  | NRXN2;NRXN2;NRX   | 0.5  | 0.00432  | 2.36443 | 0.47320989 | 0.334135493 | 0.139  |
| cg09936933 | II | 37 | 11 | 72469551  | STARD10           | 0.67 | 2.34E-05 | 4.63072 | 0.59009417 | 0.729375672 | -0.139 |
| cg13298528 | II | 37 | 11 | 118763863 | CXCR5;CXCR5       | 0.67 | 2.34E-05 | 4.63072 | 0.6770038  | 0.537512644 | 0.139  |
| cg14834893 | II | 37 | 12 | 4398032   | CCND2             | 0.5  | 0.00432  | 2.36443 | 0.22309219 | 0.361851341 | -0.139 |
| cg17955329 | II | 37 | 12 | 113528764 | DTX1              | 0.46 | 0.01197  | 1.92207 | 0.77869193 | 0.639276133 | 0.139  |
| cg01687878 | II | 37 | 12 | 123616817 |                   | 0.42 | 0.02991  | 1.52413 | 0.41426328 | 0.275495904 | 0.139  |
| cg13750802 | II | 37 | 13 | 41055185  | LOC646982;LOC646  | 0.46 | 0.01197  | 1.92207 | 0.73888327 | 0.59982676  | 0.139  |
| cg16696317 | I  | 37 | 14 | 96180406  | TCL1A;TCL1A;TCL1A | 0.67 | 2.34E-05 | 4.63072 | 0.36398464 | 0.225378868 | 0.139  |
| cg07438412 | II | 37 | 14 | 105852272 | PACS2;PACS2       | 0.54 | 0.0014   | 2.85345 | 0.5488573  | 0.687416818 | -0.139 |
| cg24663971 | I  | 37 | 14 | 106410668 |                   | 0.46 | 0.01197  | 1.92207 | 0.79557259 | 0.656122109 | 0.139  |
| cg26987928 | II | 37 | 15 | 62767926  |                   | 0.46 | 0.01197  | 1.92207 | 0.71415023 | 0.575087561 | 0.139  |
| cg03328299 | II | 37 | 15 | 74281983  | STOML1            | 0.62 | 0.0001   | 3.98291 | 0.66259422 | 0.801670737 | -0.139 |
| cg23335299 | II | 37 | 15 | 90291756  |                   | 0.58 | 0.00041  | 3.39184 | 0.68483769 | 0.82353196  | -0.139 |
| cg02593884 | II | 37 | 16 | 2984574   | FLYWCH1;FLYWCH1   | 0.54 | 0.0014   | 2.85345 | 0.66754326 | 0.806540776 | -0.139 |
| cg07427438 | II | 37 | 16 | 4819304   |                   | 0.5  | 0.00432  | 2.36443 | 0.58985215 | 0.728437254 | -0.139 |
| cg01461211 | II | 37 | 16 | 85478908  |                   | 0.42 | 0.02991  | 1.52413 | 0.46431409 | 0.325668658 | 0.139  |
| cg02976843 | II | 37 | 17 | 2843257   | RAP1GAP2;RAP1GA   | 0.54 | 0.0014   | 2.85345 | 0.5668403  | 0.705808326 | -0.139 |
| cg08860136 | I  | 37 | 17 | 7111414   | DLG4;DLG4         | 0.67 | 2.34E-05 | 4.63072 | 0.72458815 | 0.585976928 | 0.139  |
| cg25708364 | II | 37 | 17 | 18905779  | SLC5A10;FAM83G;S  | 0.46 | 0.01197  | 1.92207 | 0.41709451 | 0.556324889 | -0.139 |
| cg22186223 | II | 37 | 17 | 32690367  | CCL1              | 0.54 | 0.0014   | 2.85345 | 0.49012558 | 0.628991797 | -0.139 |
| cg02780988 | II | 37 | 17 | 39646994  | KRT36             | 0.5  | 0.00432  | 2.36443 | 0.57498354 | 0.71356488  | -0.139 |
| cg20769177 | I  | 37 | 17 | 44928516  | WNT9B             | 0.5  | 0.00432  | 2.36443 | 0.12995659 | 0.269242823 | -0.139 |
| cg27016107 | I  | 37 | 17 | 47329321  |                   | 0.67 | 2.34E-05 | 4.63072 | 0.78252162 | 0.921258923 | -0.139 |
| cg26475911 | II | 37 | 17 | 73056187  | KCTD2             | 0.58 | 0.00041  | 3.39184 | 0.40056678 | 0.539681173 | -0.139 |
| cg04476874 | II | 37 | 19 | 345778    | MIER2             | 0.62 | 0.0001   | 3.98291 | 0.56637943 | 0.705370405 | -0.139 |
| cg03875330 | II | 37 | 19 | 11455923  | TMEM205;TMEM20    | 0.5  | 0.00432  | 2.36443 | 0.39116894 | 0.530229179 | -0.139 |
| cg00509772 | II | 37 | 20 | 32273129  | E2F1              | 0.46 | 0.01197  | 1.92207 | 0.4093294  | 0.270415121 | 0.139  |
| cg04250930 | II | 37 | 22 | 24823141  | ADORA2A           | 0.46 | 0.01197  | 1.92207 | 0.62247743 | 0.483959674 | 0.139  |
| cg21271945 | II | 37 | 1  | 2080081   | PRKCZ;PRKCZ;PRKC  | 0.42 | 0.02991  | 1.52413 | 0.49930844 | 0.636997208 | -0.138 |
| cg22344254 | II | 37 | 1  | 3826803   | LOC100133612      | 0.42 | 0.02991  | 1.52413 | 0.64341346 | 0.50512559  | 0.138  |
| cg04226804 | II | 37 | 1  | 16556249  |                   | 0.58 | 0.00041  | 3.39184 | 0.55440218 | 0.415940736 | 0.138  |

|            |    |    |    |                           |      |          |         |            |             |        |
|------------|----|----|----|---------------------------|------|----------|---------|------------|-------------|--------|
| cg10776377 | II | 37 | 1  | 85359334 LPAR3            | 0.46 | 0.01197  | 1.92207 | 0.41529376 | 0.277514042 | 0.138  |
| cg18346412 | II | 37 | 1  | 111929363 LOC441897       | 0.46 | 0.01197  | 1.92207 | 0.45142327 | 0.313264157 | 0.138  |
| cg16104450 | II | 37 | 1  | 243645911 SDCCAG8         | 0.67 | 2.34E-05 | 4.63072 | 0.4093179  | 0.547812983 | -0.138 |
| cg01154283 | II | 37 | 2  | 36603543 CRIM1            | 0.62 | 0.0001   | 3.98291 | 0.48715708 | 0.625273087 | -0.138 |
| cg08879579 | II | 37 | 2  | 239478440                 | 0.62 | 0.0001   | 3.98291 | 0.45920126 | 0.597207179 | -0.138 |
| cg14473924 | II | 37 | 3  | 73674170 PDZRN3           | 0.62 | 0.0001   | 3.98291 | 0.26059846 | 0.399012088 | -0.138 |
| cg25510614 | II | 37 | 4  | 683772 MFSD7              | 0.54 | 0.0014   | 2.85345 | 0.36099466 | 0.498866985 | -0.138 |
| cg27661394 | II | 37 | 4  | 4661952                   | 0.67 | 2.34E-05 | 4.63072 | 0.71594292 | 0.854406958 | -0.138 |
| cg25987564 | I  | 37 | 4  | 6010075                   | 0.58 | 0.00041  | 3.39184 | 0.42735532 | 0.565837275 | -0.138 |
| cg23411150 | II | 37 | 6  | 1643624 GMDS              | 0.5  | 0.00432  | 2.36443 | 0.26307179 | 0.401306015 | -0.138 |
| cg14114133 | II | 37 | 6  | 10839408                  | 0.46 | 0.01197  | 1.92207 | 0.68874897 | 0.550426934 | 0.138  |
| cg11946459 | I  | 37 | 6  | 29911558 HLA-A            | 0.54 | 0.0014   | 2.85345 | 0.63622477 | 0.49804488  | 0.138  |
| cg00128100 | II | 37 | 6  | 30656094 KIAA1949;NRM;KIA | 0.42 | 0.02991  | 1.52413 | 0.77753005 | 0.63940982  | 0.138  |
| cg21105955 | II | 37 | 6  | 30684478 MDC1             | 0.46 | 0.01197  | 1.92207 | 0.62987055 | 0.492098302 | 0.138  |
| cg08827454 | II | 37 | 6  | 30922981                  | 0.58 | 0.00041  | 3.39184 | 0.24141317 | 0.379490816 | -0.138 |
| cg10180404 | I  | 37 | 6  | 32632334 HLA-DQB1         | 0.42 | 0.02991  | 1.52413 | 0.41862226 | 0.280297625 | 0.138  |
| cg01915609 | II | 37 | 6  | 146864388 RAB32           | 0.58 | 0.00041  | 3.39184 | 0.13557218 | 0.273386619 | -0.138 |
| cg17372657 | I  | 37 | 7  | 1216933                   | 0.46 | 0.01197  | 1.92207 | 0.45642527 | 0.318061    | 0.138  |
| cg05533001 | II | 37 | 7  | 2019608 MAD1L1;MAD1L1;M   | 0.5  | 0.00432  | 2.36443 | 0.59941515 | 0.461808489 | 0.138  |
| cg03744763 | II | 37 | 7  | 27184737 HOXA5            | 0.54 | 0.0014   | 2.85345 | 0.39374638 | 0.531825083 | -0.138 |
| cg02183564 | II | 37 | 7  | 76874892 CCDC146          | 0.5  | 0.00432  | 2.36443 | 0.71145036 | 0.8492996   | -0.138 |
| cg07876788 | II | 37 | 7  | 134849633 TMEM140         | 0.46 | 0.01197  | 1.92207 | 0.42540034 | 0.563446621 | -0.138 |
| cg16697850 | II | 37 | 7  | 141946928 MOXD2           | 0.5  | 0.00432  | 2.36443 | 0.74810333 | 0.609884485 | 0.138  |
| cg20088245 | II | 37 | 8  | 1321375                   | 0.42 | 0.02991  | 1.52413 | 0.3905613  | 0.528567507 | -0.138 |
| cg26392737 | II | 37 | 8  | 21916853 EPB49;EPB49;EPB4 | 0.5  | 0.00432  | 2.36443 | 0.46090562 | 0.599392383 | -0.138 |
| cg26980244 | II | 37 | 8  | 24772513 NEFM;NEFM;NEFM   | 0.54 | 0.0014   | 2.85345 | 0.15148136 | 0.289917472 | -0.138 |
| cg06992846 | II | 37 | 8  | 126448837 TRIB1           | 0.5  | 0.00432  | 2.36443 | 0.50175905 | 0.640094918 | -0.138 |
| cg20071744 | I  | 37 | 8  | 141057329 TRAPPC9;TRAPPC9 | 0.42 | 0.02991  | 1.52413 | 0.75492602 | 0.616877302 | 0.138  |
| cg14435659 | II | 37 | 9  | 84308250                  | 0.42 | 0.02991  | 1.52413 | 0.67953784 | 0.541136786 | 0.138  |
| cg13549345 | I  | 37 | 9  | 138904964 NACC2           | 0.5  | 0.00432  | 2.36443 | 0.86042778 | 0.722639413 | 0.138  |
| cg05254221 | II | 37 | 10 | 61050062 FAM13C;FAM13C;F  | 0.54 | 0.0014   | 2.85345 | 0.78920225 | 0.65140386  | 0.138  |
| cg02909446 | II | 37 | 10 | 73849124 SPOCK2;SPOCK2    | 0.54 | 0.0014   | 2.85345 | 0.68049659 | 0.542324659 | 0.138  |
| cg12083893 | II | 37 | 10 | 91111929                  | 0.46 | 0.01197  | 1.92207 | 0.76124109 | 0.623080439 | 0.138  |

|            |    |    |    |           |                  |      |         |         |            |             |        |
|------------|----|----|----|-----------|------------------|------|---------|---------|------------|-------------|--------|
| cg02980499 | II | 37 | 10 | 98031964  | BLNK;BLNK        | 0.46 | 0.01197 | 1.92207 | 0.72494943 | 0.587112913 | 0.138  |
| cg15280185 | II | 37 | 10 | 103500442 |                  | 0.5  | 0.00432 | 2.36443 | 0.71530139 | 0.577170912 | 0.138  |
| cg09985802 | II | 37 | 10 | 126234119 | LHPP;LHPP        | 0.62 | 0.0001  | 3.98291 | 0.51978427 | 0.381390973 | 0.138  |
| cg00568164 | II | 37 | 11 | 44927222  | TSPAN18;TSPAN18  | 0.46 | 0.01197 | 1.92207 | 0.67199645 | 0.53389218  | 0.138  |
| cg21667069 | II | 37 | 11 | 67778641  | ALDH3B1;ALDH3B1  | 0.54 | 0.0014  | 2.85345 | 0.40896913 | 0.547407898 | -0.138 |
| cg01508380 | II | 37 | 14 | 23305585  | MMP14            | 0.54 | 0.0014  | 2.85345 | 0.30452018 | 0.442182986 | -0.138 |
| cg02072834 | II | 37 | 14 | 76589894  |                  | 0.5  | 0.00432 | 2.36443 | 0.57161657 | 0.433518169 | 0.138  |
| cg07076915 | I  | 37 | 16 | 2174754   | PKD1;PKD1        | 0.46 | 0.01197 | 1.92207 | 0.36821333 | 0.506134108 | -0.138 |
| cg06833564 | I  | 37 | 16 | 4665307   | FAM100A          | 0.62 | 0.0001  | 3.98291 | 0.8714561  | 0.733027559 | 0.138  |
| cg04904276 | I  | 37 | 16 | 11835562  | TXNDC11          | 0.5  | 0.00432 | 2.36443 | 0.68597105 | 0.547791039 | 0.138  |
| cg00204512 | II | 37 | 16 | 28754710  |                  | 0.46 | 0.01197 | 1.92207 | 0.27493127 | 0.413328252 | -0.138 |
| cg07574924 | II | 37 | 16 | 81682484  | CMIP;CMIP        | 0.54 | 0.0014  | 2.85345 | 0.58403485 | 0.722055544 | -0.138 |
| cg26697517 | II | 37 | 16 | 88152986  |                  | 0.54 | 0.0014  | 2.85345 | 0.49884927 | 0.637221065 | -0.138 |
| cg04364752 | II | 37 | 16 | 88906534  | GALNS            | 0.46 | 0.01197 | 1.92207 | 0.436208   | 0.574649861 | -0.138 |
| cg02679012 | I  | 37 | 17 | 773283    | NXN              | 0.5  | 0.00432 | 2.36443 | 0.73353444 | 0.595456912 | 0.138  |
| cg27060340 | I  | 37 | 17 | 43502999  | ARHGAP27;ARHGAI  | 0.46 | 0.01197 | 1.92207 | 0.26285498 | 0.401198495 | -0.138 |
| cg20830994 | II | 37 | 17 | 62401400  | PECAM1           | 0.54 | 0.0014  | 2.85345 | 0.58774267 | 0.449654285 | 0.138  |
| cg04334723 | II | 37 | 19 | 13054427  | CALR             | 0.42 | 0.02991 | 1.52413 | 0.49774577 | 0.635865886 | -0.138 |
| cg09231418 | II | 37 | 19 | 36202390  | ZBTB32           | 0.5  | 0.00432 | 2.36443 | 0.64417633 | 0.506042877 | 0.138  |
| cg24548817 | II | 37 | 21 | 45774294  | TRPM2            | 0.58 | 0.00041 | 3.39184 | 0.24988183 | 0.387902047 | -0.138 |
| cg20376123 | I  | 37 | 22 | 46760595  | CELSR1           | 0.46 | 0.01197 | 1.92207 | 0.55781427 | 0.420176359 | 0.138  |
| cg25392995 | II | 37 | 22 | 50625926  | TRABD            | 0.46 | 0.01197 | 1.92207 | 0.53766067 | 0.400049264 | 0.138  |
| cg23629166 | I  | 37 | 1  | 2345368   | PEX10;PEX10      | 0.5  | 0.00432 | 2.36443 | 0.73922827 | 0.601941176 | 0.137  |
| cg27573298 | II | 37 | 1  | 14697589  |                  | 0.5  | 0.00432 | 2.36443 | 0.58492724 | 0.44769978  | 0.137  |
| cg24593372 | II | 37 | 1  | 54562121  | C1orf83          | 0.54 | 0.0014  | 2.85345 | 0.28850435 | 0.425646807 | -0.137 |
| cg19645639 | I  | 37 | 1  | 113500384 | SLC16A1          | 0.46 | 0.01197 | 1.92207 | 0.69524507 | 0.558391523 | 0.137  |
| cg11815057 | I  | 37 | 1  | 153670855 |                  | 0.54 | 0.0014  | 2.85345 | 0.45978417 | 0.322537538 | 0.137  |
| cg06980173 | II | 37 | 1  | 154376344 | IL6R;IL6R        | 0.5  | 0.00432 | 2.36443 | 0.41241288 | 0.549320795 | -0.137 |
| cg22018051 | II | 37 | 1  | 154943349 | SHC1;SHC1;SHC1;S | 0.54 | 0.0014  | 2.85345 | 0.3315891  | 0.468972288 | -0.137 |
| cg13861536 | II | 37 | 1  | 180904914 | KIAA1614         | 0.42 | 0.02991 | 1.52413 | 0.43197689 | 0.294850793 | 0.137  |
| cg06511330 | II | 37 | 1  | 234635574 |                  | 0.42 | 0.02991 | 1.52413 | 0.61758547 | 0.75457287  | -0.137 |
| cg10929758 | II | 37 | 2  | 54857270  | SPTBN1;SPTBN1    | 0.46 | 0.01197 | 1.92207 | 0.78864957 | 0.651716551 | 0.137  |
| cg26476820 | II | 37 | 2  | 85637851  | CAPG             | 0.5  | 0.00432 | 2.36443 | 0.45714729 | 0.594133705 | -0.137 |

|            |    |    |    |                              |      |          |         |            |             |        |
|------------|----|----|----|------------------------------|------|----------|---------|------------|-------------|--------|
| cg00605777 | II | 37 | 2  | 97533635 SEMA4C              | 0.58 | 0.00041  | 3.39184 | 0.42585041 | 0.562508386 | -0.137 |
| cg00010078 | II | 37 | 2  | 109967172 SH3RF3             | 0.5  | 0.00432  | 2.36443 | 0.36639025 | 0.503806028 | -0.137 |
| cg04738464 | II | 37 | 2  | 218868754                    | 0.5  | 0.00432  | 2.36443 | 0.28413117 | 0.421182078 | -0.137 |
| cg15002163 | II | 37 | 2  | 240161924 HDAC4              | 0.67 | 2.34E-05 | 4.63072 | 0.5845691  | 0.72183126  | -0.137 |
| cg22870429 | II | 37 | 3  | 114027859 TIGIT              | 0.54 | 0.0014   | 2.85345 | 0.70655943 | 0.569548381 | 0.137  |
| cg05480110 | I  | 37 | 3  | 195534854 MUC4;MUC4;MUC4     | 0.54 | 0.0014   | 2.85345 | 0.61756698 | 0.480698986 | 0.137  |
| cg24826020 | II | 37 | 4  | 38070998 TBC1D1              | 0.58 | 0.00041  | 3.39184 | 0.21861857 | 0.355612322 | -0.137 |
| cg02375208 | II | 37 | 5  | 77804381 LHFPL2              | 0.58 | 0.00041  | 3.39184 | 0.25843869 | 0.395666757 | -0.137 |
| cg07875121 | II | 37 | 5  | 139641530 PFDN1              | 0.58 | 0.00041  | 3.39184 | 0.67995206 | 0.817084962 | -0.137 |
| cg01823925 | II | 37 | 5  | 156967901 ADAM19             | 0.54 | 0.0014   | 2.85345 | 0.50980556 | 0.372480276 | 0.137  |
| cg01970383 | II | 37 | 5  | 177729224 COL23A1            | 0.42 | 0.02991  | 1.52413 | 0.7104287  | 0.573491759 | 0.137  |
| cg08376141 | II | 37 | 6  | 32116591 PRRT1               | 0.54 | 0.0014   | 2.85345 | 0.25787185 | 0.394846532 | -0.137 |
| cg06902099 | II | 37 | 6  | 35002597 ANKS1A              | 0.5  | 0.00432  | 2.36443 | 0.19939107 | 0.336078256 | -0.137 |
| cg00807871 | I  | 37 | 6  | 37617124 MDGA1               | 0.42 | 0.02991  | 1.52413 | 0.23666167 | 0.374161397 | -0.137 |
| cg23317857 | II | 37 | 6  | 41696297 TFEB;TFEB           | 0.62 | 0.0001   | 3.98291 | 0.5791249  | 0.441701002 | 0.137  |
| cg09293890 | II | 37 | 6  | 43682839                     | 0.46 | 0.01197  | 1.92207 | 0.44178713 | 0.304790742 | 0.137  |
| cg14835981 | II | 37 | 7  | 752715 PRKAR1B;PRKAR1B       | 0.62 | 0.0001   | 3.98291 | 0.48968988 | 0.626276389 | -0.137 |
| cg02185182 | II | 37 | 7  | 2185550 MAD1L1;MAD1L1;MAD1L1 | 0.5  | 0.00432  | 2.36443 | 0.68032732 | 0.817268836 | -0.137 |
| cg06898168 | II | 37 | 7  | 5447353 TNRC18               | 0.58 | 0.00041  | 3.39184 | 0.58452898 | 0.721926289 | -0.137 |
| cg00852675 | I  | 37 | 7  | 150105086 LOC728743          | 0.46 | 0.01197  | 1.92207 | 0.74361595 | 0.606484232 | 0.137  |
| cg17082719 | I  | 37 | 8  | 144896176 SCRIB;SCRIB;MIR93  | 0.58 | 0.00041  | 3.39184 | 0.78885798 | 0.925802594 | -0.137 |
| cg13863007 | II | 37 | 9  | 95766607 FGD3;FGD3           | 0.5  | 0.00432  | 2.36443 | 0.6149431  | 0.752116919 | -0.137 |
| cg13458384 | II | 37 | 9  | 136567339 SARDH;SARDH        | 0.54 | 0.0014   | 2.85345 | 0.63313688 | 0.496258127 | 0.137  |
| cg14135809 | II | 37 | 9  | 140502926 ARRDC1             | 0.5  | 0.00432  | 2.36443 | 0.35456562 | 0.491122143 | -0.137 |
| cg25024734 | II | 37 | 10 | 112152815                    | 0.46 | 0.01197  | 1.92207 | 0.21147471 | 0.348265306 | -0.137 |
| cg12323347 | II | 37 | 10 | 112256517 DUSP5              | 0.5  | 0.00432  | 2.36443 | 0.36005025 | 0.496619682 | -0.137 |
| cg05261592 | II | 37 | 11 | 8215201                      | 0.46 | 0.01197  | 1.92207 | 0.63056272 | 0.493086891 | 0.137  |
| cg10437839 | II | 37 | 11 | 64701910 PPP2R5B             | 0.5  | 0.00432  | 2.36443 | 0.68994223 | 0.826599499 | -0.137 |
| cg03371384 | II | 37 | 11 | 69260271                     | 0.62 | 0.0001   | 3.98291 | 0.73855089 | 0.875059466 | -0.137 |
| cg19388930 | II | 37 | 11 | 129564373                    | 0.58 | 0.00041  | 3.39184 | 0.66916417 | 0.532254442 | 0.137  |
| cg03392386 | I  | 37 | 11 | 133800800 IGSF9B             | 0.58 | 0.00041  | 3.39184 | 0.80166678 | 0.664686482 | 0.137  |
| cg24437859 | II | 37 | 12 | 7066614 PTPN6;PTPN6;PTPN6    | 0.42 | 0.02991  | 1.52413 | 0.67721661 | 0.540297545 | 0.137  |
| cg06395232 | II | 37 | 12 | 15105654 ARHGDI B            | 0.46 | 0.01197  | 1.92207 | 0.41122216 | 0.27461887  | 0.137  |

|            |    |    |    |                            |      |         |         |            |             |        |
|------------|----|----|----|----------------------------|------|---------|---------|------------|-------------|--------|
| cg17332198 | II | 37 | 12 | 58209913 AVIL              | 0.58 | 0.00041 | 3.39184 | 0.52051122 | 0.657420067 | -0.137 |
| cg04456029 | I  | 37 | 12 | 113496126 DTX1             | 0.46 | 0.01197 | 1.92207 | 0.72642706 | 0.589909205 | 0.137  |
| cg04716447 | I  | 37 | 12 | 122444621                  | 0.54 | 0.0014  | 2.85345 | 0.47096386 | 0.333826493 | 0.137  |
| cg21598343 | II | 37 | 13 | 114261986 TFDP1;TFDP1      | 0.58 | 0.00041 | 3.39184 | 0.36616428 | 0.502868313 | -0.137 |
| cg12938556 | I  | 37 | 13 | 114812918 RASA3            | 0.62 | 0.0001  | 3.98291 | 0.62251299 | 0.485765824 | 0.137  |
| cg02039171 | II | 37 | 14 | 23588162 CEBPE             | 0.58 | 0.00041 | 3.39184 | 0.54118637 | 0.678102162 | -0.137 |
| cg01098955 | II | 37 | 14 | 106322163                  | 0.46 | 0.01197 | 1.92207 | 0.69011339 | 0.553339873 | 0.137  |
| cg23934731 | I  | 37 | 15 | 89904873                   | 0.42 | 0.02991 | 1.52413 | 0.55821915 | 0.695311134 | -0.137 |
| cg04848686 | II | 37 | 16 | 88747591 MGC23284;SNAI3    | 0.5  | 0.00432 | 2.36443 | 0.60621323 | 0.469026816 | 0.137  |
| cg09115713 | I  | 37 | 16 | 88832476 FAM38A            | 0.5  | 0.00432 | 2.36443 | 0.82867297 | 0.691591363 | 0.137  |
| cg11801411 | II | 37 | 17 | 1628727 WDR81;WDR81;WI     | 0.58 | 0.00041 | 3.39184 | 0.41861421 | 0.555880933 | -0.137 |
| cg14918082 | II | 37 | 17 | 7833237 KCNAB3             | 0.46 | 0.01197 | 1.92207 | 0.69199611 | 0.555219545 | 0.137  |
| cg13190608 | II | 37 | 17 | 37322730 ARL5C             | 0.42 | 0.02991 | 1.52413 | 0.44572901 | 0.582631114 | -0.137 |
| cg26336935 | II | 37 | 17 | 39769213 KRT16             | 0.62 | 0.0001  | 3.98291 | 0.52608923 | 0.662608477 | -0.137 |
| cg05465955 | I  | 37 | 17 | 40715236 COASY;COASY;COA'  | 0.46 | 0.01197 | 1.92207 | 0.77903074 | 0.642057265 | 0.137  |
| cg19106478 | II | 37 | 17 | 40800053                   | 0.54 | 0.0014  | 2.85345 | 0.24363656 | 0.106858845 | 0.137  |
| cg13948956 | II | 37 | 17 | 55210898                   | 0.46 | 0.01197 | 1.92207 | 0.61656313 | 0.479240417 | 0.137  |
| cg11699517 | I  | 37 | 17 | 79419796 BAHCC1            | 0.42 | 0.02991 | 1.52413 | 0.63751193 | 0.500688783 | 0.137  |
| cg24380489 | II | 37 | 17 | 79793082 DYSFIP1           | 0.62 | 0.0001  | 3.98291 | 0.65817836 | 0.795406024 | -0.137 |
| cg00830755 | II | 37 | 17 | 80819020 TBCD              | 0.5  | 0.00432 | 2.36443 | 0.672121   | 0.534979846 | 0.137  |
| cg26052586 | I  | 37 | 18 | 20717411 CABLES1;CABLES1   | 0.46 | 0.01197 | 1.92207 | 0.30309289 | 0.439974074 | -0.137 |
| cg12062672 | I  | 37 | 19 | 643555 FGF22               | 0.42 | 0.02991 | 1.52413 | 0.72196625 | 0.585357357 | 0.137  |
| cg24926276 | II | 37 | 19 | 4539943 LRG1               | 0.58 | 0.00041 | 3.39184 | 0.61757303 | 0.75467004  | -0.137 |
| cg20234640 | II | 37 | 19 | 7767089 FCER2              | 0.46 | 0.01197 | 1.92207 | 0.42118821 | 0.284460869 | 0.137  |
| cg09277709 | II | 37 | 19 | 46224285 FBXO46            | 0.54 | 0.0014  | 2.85345 | 0.74381537 | 0.880653694 | -0.137 |
| cg25975071 | II | 37 | 19 | 55173527 LILRB4;LILRB4     | 0.46 | 0.01197 | 1.92207 | 0.56280383 | 0.425344847 | 0.137  |
| cg00087601 | II | 37 | 21 | 35747094 FAM165B           | 0.5  | 0.00432 | 2.36443 | 0.73088804 | 0.867969616 | -0.137 |
| cg12746557 | II | 37 | 21 | 39644332 KCNJ15;KCNJ15;KCI | 0.42 | 0.02991 | 1.52413 | 0.38413752 | 0.521575816 | -0.137 |
| cg03364108 | I  | 37 | 22 | 24890794 C22orf45;C22orf45 | 0.54 | 0.0014  | 2.85345 | 0.12611982 | 0.26270778  | -0.137 |
| cg21757633 | II | 37 | 22 | 50847567 SAPS2             | 0.62 | 0.0001  | 3.98291 | 0.50215047 | 0.639272265 | -0.137 |
| cg21775570 | II | 37 | 1  | 2171834 SKI                | 0.62 | 0.0001  | 3.98291 | 0.36464916 | 0.501130506 | -0.136 |
| cg13551754 | II | 37 | 1  | 21619913 ECE1              | 0.5  | 0.00432 | 2.36443 | 0.38787314 | 0.252004889 | 0.136  |
| cg04573706 | II | 37 | 1  | 22216432 HSPG2             | 0.54 | 0.0014  | 2.85345 | 0.78714903 | 0.651566739 | 0.136  |

|            |    |    |    |                              |      |          |         |            |             |        |
|------------|----|----|----|------------------------------|------|----------|---------|------------|-------------|--------|
| cg03655701 | II | 37 | 1  | 24885664 C1orf130            | 0.5  | 0.00432  | 2.36443 | 0.31301107 | 0.449086174 | -0.136 |
| cg07794010 | II | 37 | 1  | 114665617 SYT6               | 0.54 | 0.0014   | 2.85345 | 0.56156499 | 0.697878254 | -0.136 |
| cg16409409 | I  | 37 | 1  | 200861597 C1orf106           | 0.5  | 0.00432  | 2.36443 | 0.29554864 | 0.431521422 | -0.136 |
| cg07561747 | II | 37 | 1  | 200983313 KIF21B             | 0.54 | 0.0014   | 2.85345 | 0.65572876 | 0.791427615 | -0.136 |
| cg01057552 | II | 37 | 1  | 228415374 OBSCN;OBSCN        | 0.54 | 0.0014   | 2.85345 | 0.6653443  | 0.801514201 | -0.136 |
| cg02844899 | II | 37 | 2  | 47182345 TTC7A               | 0.54 | 0.0014   | 2.85345 | 0.49627629 | 0.631923791 | -0.136 |
| cg13000080 | II | 37 | 2  | 75043142                     | 0.46 | 0.01197  | 1.92207 | 0.4609462  | 0.596626409 | -0.136 |
| cg22670147 | I  | 37 | 2  | 115419740 DPP10              | 0.5  | 0.00432  | 2.36443 | 0.17905775 | 0.314801209 | -0.136 |
| cg00748072 | II | 37 | 2  | 174862824                    | 0.5  | 0.00432  | 2.36443 | 0.73359824 | 0.869118957 | -0.136 |
| cg19955928 | I  | 37 | 2  | 240152257 HDAC4              | 0.54 | 0.0014   | 2.85345 | 0.30128454 | 0.437231259 | -0.136 |
| cg18644782 | II | 37 | 3  | 13045896 IQSEC1              | 0.5  | 0.00432  | 2.36443 | 0.66394081 | 0.528207491 | 0.136  |
| cg24296397 | II | 37 | 3  | 49692537 BSN                 | 0.46 | 0.01197  | 1.92207 | 0.39680493 | 0.260874028 | 0.136  |
| cg05622438 | II | 37 | 3  | 51419127 DOCK3               | 0.54 | 0.0014   | 2.85345 | 0.65572176 | 0.792018161 | -0.136 |
| cg17491449 | II | 37 | 4  | 3344154 RGS12;RGS12          | 0.54 | 0.0014   | 2.85345 | 0.26856688 | 0.404086214 | -0.136 |
| cg13929988 | I  | 37 | 4  | 88140436 KLHL8               | 0.58 | 0.00041  | 3.39184 | 0.31962567 | 0.455841758 | -0.136 |
| cg17598923 | II | 37 | 5  | 101119084                    | 0.46 | 0.01197  | 1.92207 | 0.51026588 | 0.646330394 | -0.136 |
| cg18331412 | I  | 37 | 5  | 135364986 TGFBI              | 0.54 | 0.0014   | 2.85345 | 0.50875026 | 0.644519795 | -0.136 |
| cg08747807 | II | 37 | 5  | 176005051 PCDH24             | 0.58 | 0.00041  | 3.39184 | 0.69907123 | 0.563299175 | 0.136  |
| cg12633154 | I  | 37 | 6  | 30039435 RNF39;RNF39         | 0.46 | 0.01197  | 1.92207 | 0.14067382 | 0.276900089 | -0.136 |
| cg14136042 | II | 37 | 6  | 31513306 ATP6V1G2;NFKBIL1    | 0.54 | 0.0014   | 2.85345 | 0.78370595 | 0.647876877 | 0.136  |
| cg10871120 | II | 37 | 6  | 39891273 MOCS1;MOCS1;MC      | 0.46 | 0.01197  | 1.92207 | 0.50503335 | 0.641489258 | -0.136 |
| cg00806239 | II | 37 | 6  | 43456984 TJAP1;TJAP1;TJAP1   | 0.5  | 0.00432  | 2.36443 | 0.71736335 | 0.581647965 | 0.136  |
| cg00782811 | II | 37 | 6  | 46293734 RCAN2               | 0.5  | 0.00432  | 2.36443 | 0.47244871 | 0.336837547 | 0.136  |
| cg12366968 | II | 37 | 7  | 1883876 MAD1L1;MAD1L1;M      | 0.42 | 0.02991  | 1.52413 | 0.38928354 | 0.253367283 | 0.136  |
| cg20947553 | II | 37 | 7  | 6440601 RAC1;RAC1            | 0.67 | 2.34E-05 | 4.63072 | 0.72335355 | 0.859460465 | -0.136 |
| cg18463876 | II | 37 | 7  | 75906035 SRRM3               | 0.58 | 0.00041  | 3.39184 | 0.71049843 | 0.574929454 | 0.136  |
| cg07125725 | II | 37 | 7  | 99612773 ZKSCAN1             | 0.67 | 2.34E-05 | 4.63072 | 0.46716618 | 0.603438857 | -0.136 |
| cg19889856 | II | 37 | 7  | 134856654 C7orf49;C7orf49;C7 | 0.5  | 0.00432  | 2.36443 | 0.62182033 | 0.758218939 | -0.136 |
| cg27497928 | II | 37 | 7  | 143049069 CLCN1              | 0.58 | 0.00041  | 3.39184 | 0.56981025 | 0.43369047  | 0.136  |
| cg13538006 | II | 37 | 9  | 95897313 NINJ1               | 0.46 | 0.01197  | 1.92207 | 0.3640378  | 0.228090893 | 0.136  |
| cg23680451 | II | 37 | 10 | 3823790 KLF6;KLF6;KLF6;KLF   | 0.42 | 0.02991  | 1.52413 | 0.34076656 | 0.476608314 | -0.136 |
| cg06784824 | II | 37 | 11 | 47376985 SPI1;SPI1           | 0.5  | 0.00432  | 2.36443 | 0.62102872 | 0.756684704 | -0.136 |
| cg10675058 | II | 37 | 11 | 63858880 MACROD1             | 0.5  | 0.00432  | 2.36443 | 0.41203114 | 0.547643017 | -0.136 |

|            |    |    |    |           |                  |      |          |         |            |             |        |
|------------|----|----|----|-----------|------------------|------|----------|---------|------------|-------------|--------|
| cg02023728 | II | 37 | 11 | 77925099  | USP35            | 0.46 | 0.01197  | 1.92207 | 0.58916726 | 0.724905786 | -0.136 |
| cg08182171 | II | 37 | 11 | 130291156 | ADAMTS8          | 0.5  | 0.00432  | 2.36443 | 0.48289413 | 0.618963774 | -0.136 |
| cg19369955 | I  | 37 | 12 | 2030178   |                  | 0.58 | 0.00041  | 3.39184 | 0.11110925 | 0.247242801 | -0.136 |
| cg27478242 | I  | 37 | 12 | 54611928  |                  | 0.46 | 0.01197  | 1.92207 | 0.45322888 | 0.317063305 | 0.136  |
| cg18236066 | II | 37 | 12 | 113293823 | RPH3A;RPH3A      | 0.58 | 0.00041  | 3.39184 | 0.62673915 | 0.763130675 | -0.136 |
| cg18449739 | II | 37 | 12 | 113495701 | DTX1;DTX1        | 0.58 | 0.00041  | 3.39184 | 0.66410359 | 0.527880204 | 0.136  |
| cg24191847 | II | 37 | 14 | 91037045  | TTC7B            | 0.71 | 4.57E-06 | 5.34042 | 0.59993669 | 0.735693264 | -0.136 |
| cg09717923 | I  | 37 | 16 | 1440498   |                  | 0.5  | 0.00432  | 2.36443 | 0.73702319 | 0.600773184 | 0.136  |
| cg01389428 | II | 37 | 16 | 11594557  |                  | 0.5  | 0.00432  | 2.36443 | 0.50351532 | 0.639749206 | -0.136 |
| cg26685404 | II | 37 | 16 | 23957272  | PRKCB;PRKCB      | 0.46 | 0.01197  | 1.92207 | 0.41536928 | 0.551111202 | -0.136 |
| cg04416111 | II | 37 | 16 | 87234895  |                  | 0.46 | 0.01197  | 1.92207 | 0.79551041 | 0.659892696 | 0.136  |
| cg03272932 | II | 37 | 16 | 87588893  |                  | 0.5  | 0.00432  | 2.36443 | 0.61340626 | 0.749189528 | -0.136 |
| cg24476449 | II | 37 | 17 | 25799212  | KSR1             | 0.46 | 0.01197  | 1.92207 | 0.60459553 | 0.468267945 | 0.136  |
| cg01351315 | II | 37 | 17 | 46667737  | LOC404266;LOC404 | 0.54 | 0.0014   | 2.85345 | 0.22306991 | 0.358970601 | -0.136 |
| cg11598872 | II | 37 | 17 | 75881232  | FLJ45079         | 0.62 | 0.0001   | 3.98291 | 0.53113206 | 0.394983976 | 0.136  |
| cg21320221 | II | 37 | 17 | 79792997  | DYSFIP1          | 0.58 | 0.00041  | 3.39184 | 0.68658954 | 0.822157594 | -0.136 |
| cg06394229 | II | 37 | 19 | 39303775  | LGALS4           | 0.54 | 0.0014   | 2.85345 | 0.5087074  | 0.644466917 | -0.136 |
| cg06580800 | II | 37 | 19 | 39921535  |                  | 0.46 | 0.01197  | 1.92207 | 0.27991707 | 0.415617766 | -0.136 |
| cg03138287 | I  | 37 | 19 | 49440536  | DHDH             | 0.58 | 0.00041  | 3.39184 | 0.71472705 | 0.850748134 | -0.136 |
| cg22321036 | II | 37 | 19 | 56061348  |                  | 0.42 | 0.02991  | 1.52413 | 0.79191675 | 0.655941819 | 0.136  |
| cg04368843 | II | 37 | 20 | 3660815   | ADAM33;ADAM33    | 0.54 | 0.0014   | 2.85345 | 0.65790726 | 0.521492766 | 0.136  |
| cg09273716 | II | 37 | 20 | 35494835  |                  | 0.5  | 0.00432  | 2.36443 | 0.59707905 | 0.733199838 | -0.136 |
| cg01064979 | II | 37 | 22 | 37309487  | CSF2RB           | 0.46 | 0.01197  | 1.92207 | 0.39092804 | 0.526767637 | -0.136 |
| cg02769477 | I  | 37 | 1  | 17012728  |                  | 0.54 | 0.0014   | 2.85345 | 0.64934664 | 0.514352617 | 0.135  |
| cg22558673 | II | 37 | 1  | 35257858  | GJA4             | 0.5  | 0.00432  | 2.36443 | 0.54903265 | 0.414398359 | 0.135  |
| cg17434008 | II | 37 | 1  | 38974111  |                  | 0.58 | 0.00041  | 3.39184 | 0.44775001 | 0.582707549 | -0.135 |
| cg23656322 | II | 37 | 1  | 153533922 | S100A2           | 0.58 | 0.00041  | 3.39184 | 0.5565598  | 0.691869219 | -0.135 |
| cg13077784 | II | 37 | 1  | 201706363 | NAV1             | 0.46 | 0.01197  | 1.92207 | 0.36063006 | 0.225440922 | 0.135  |
| cg04222159 | I  | 37 | 1  | 204981786 | NFASC;NFASC;NFAS | 0.62 | 0.0001   | 3.98291 | 0.51528618 | 0.38003506  | 0.135  |
| cg02035751 | II | 37 | 1  | 206729099 | RASSF5;RASSF5;RA | 0.54 | 0.0014   | 2.85345 | 0.6258531  | 0.490778325 | 0.135  |
| cg03054277 | I  | 37 | 1  | 228400217 | OBSCN;OBSCN      | 0.5  | 0.00432  | 2.36443 | 0.7801617  | 0.645367448 | 0.135  |
| cg07052737 | II | 37 | 2  | 26224428  |                  | 0.5  | 0.00432  | 2.36443 | 0.52712133 | 0.662147547 | -0.135 |
| cg04526104 | II | 37 | 2  | 217839249 |                  | 0.54 | 0.0014   | 2.85345 | 0.72173738 | 0.586271753 | 0.135  |

|            |    |    |    |                            |      |          |         |            |             |        |
|------------|----|----|----|----------------------------|------|----------|---------|------------|-------------|--------|
| cg06753787 | II | 37 | 2  | 220074208 ZFAND2B          | 0.71 | 4.57E-06 | 5.34042 | 0.43912546 | 0.574045722 | -0.135 |
| cg05058748 | II | 37 | 2  | 235903542 SH3BP4           | 0.46 | 0.01197  | 1.92207 | 0.5006116  | 0.635751456 | -0.135 |
| cg11557929 | II | 37 | 3  | 48489291 ATRIP;ATRIP       | 0.58 | 0.00041  | 3.39184 | 0.7193023  | 0.854431939 | -0.135 |
| cg04967039 | II | 37 | 4  | 8292202 HTRA3              | 0.54 | 0.0014   | 2.85345 | 0.5475923  | 0.412539209 | 0.135  |
| cg19668476 | II | 37 | 4  | 153506267                  | 0.67 | 2.34E-05 | 4.63072 | 0.80507927 | 0.66972507  | 0.135  |
| cg10586870 | II | 37 | 5  | 75722317 IQGAP2            | 0.46 | 0.01197  | 1.92207 | 0.25972133 | 0.394764435 | -0.135 |
| cg27300619 | II | 37 | 5  | 139120130                  | 0.42 | 0.02991  | 1.52413 | 0.61130657 | 0.476600836 | 0.135  |
| cg27315555 | II | 37 | 5  | 142211162 ARHGAP26;ARHGAI  | 0.62 | 0.0001   | 3.98291 | 0.6745041  | 0.809841457 | -0.135 |
| cg18307303 | II | 37 | 5  | 158757456 IL12B;IL12B      | 0.58 | 0.00041  | 3.39184 | 0.65997203 | 0.79519764  | -0.135 |
| cg19576697 | II | 37 | 5  | 176837920 F12              | 0.42 | 0.02991  | 1.52413 | 0.42716386 | 0.562551965 | -0.135 |
| cg16907934 | II | 37 | 6  | 3848904 FAM50B             | 0.58 | 0.00041  | 3.39184 | 0.69638796 | 0.831597522 | -0.135 |
| cg24735489 | II | 37 | 6  | 31088352 CDSN;PSORS1C1     | 0.54 | 0.0014   | 2.85345 | 0.36622767 | 0.501233293 | -0.135 |
| cg17113856 | II | 37 | 6  | 32120895 PPT2;PRRT1;PPT2   | 0.5  | 0.00432  | 2.36443 | 0.71879645 | 0.584189994 | 0.135  |
| cg07417146 | I  | 37 | 6  | 33400528 SYNGAP1           | 0.5  | 0.00432  | 2.36443 | 0.63056643 | 0.765117613 | -0.135 |
| cg05568549 | II | 37 | 6  | 41907198 CCND3;CCND3;CCN   | 0.58 | 0.00041  | 3.39184 | 0.30526196 | 0.440066714 | -0.135 |
| cg03316570 | II | 37 | 6  | 43877657 LOC100132354      | 0.42 | 0.02991  | 1.52413 | 0.64692585 | 0.512128133 | 0.135  |
| cg16313758 | II | 37 | 7  | 2647039 IQCE;IQCE          | 0.62 | 0.0001   | 3.98291 | 0.65901183 | 0.794337274 | -0.135 |
| cg11554295 | II | 37 | 7  | 5523691 FBXL18             | 0.5  | 0.00432  | 2.36443 | 0.5320329  | 0.667428084 | -0.135 |
| cg13736939 | II | 37 | 7  | 157647241 PTPRN2;PTPRN2;PT | 0.67 | 2.34E-05 | 4.63072 | 0.31867279 | 0.453530318 | -0.135 |
| cg13434842 | I  | 37 | 8  | 11567896 GATA4             | 0.46 | 0.01197  | 1.92207 | 0.28045952 | 0.415229226 | -0.135 |
| cg26209487 | I  | 37 | 8  | 56931739                   | 0.62 | 0.0001   | 3.98291 | 0.50734088 | 0.372268284 | 0.135  |
| cg14162361 | II | 37 | 9  | 82449859                   | 0.5  | 0.00432  | 2.36443 | 0.76969165 | 0.634855021 | 0.135  |
| cg11884704 | II | 37 | 9  | 130854313 SLC25A25;SLC25A2 | 0.67 | 2.34E-05 | 4.63072 | 0.58553711 | 0.720555933 | -0.135 |
| cg13572237 | II | 37 | 9  | 139266293 CARD9;CARD9      | 0.5  | 0.00432  | 2.36443 | 0.66328039 | 0.528229635 | 0.135  |
| cg23054840 | II | 37 | 10 | 45920485 ALOX5             | 0.5  | 0.00432  | 2.36443 | 0.33674168 | 0.47202851  | -0.135 |
| cg16265932 | II | 37 | 10 | 112460964 RBM20            | 0.46 | 0.01197  | 1.92207 | 0.78924994 | 0.654031707 | 0.135  |
| cg19317226 | I  | 37 | 10 | 130726701                  | 0.42 | 0.02991  | 1.52413 | 0.73734813 | 0.872373732 | -0.135 |
| cg19149132 | I  | 37 | 10 | 130854436                  | 0.5  | 0.00432  | 2.36443 | 0.76928464 | 0.634247556 | 0.135  |
| cg16498504 | II | 37 | 11 | 2043711                    | 0.5  | 0.00432  | 2.36443 | 0.42626883 | 0.561276581 | -0.135 |
| cg02258534 | II | 37 | 11 | 2555497 KCNQ1;KCNQ1        | 0.75 | 7.61E-07 | 6.11857 | 0.49253086 | 0.627652126 | -0.135 |
| cg03211593 | II | 37 | 11 | 44731693                   | 0.62 | 0.0001   | 3.98291 | 0.41071542 | 0.545345276 | -0.135 |
| cg21002528 | II | 37 | 11 | 45903754 CRY2;CRY2         | 0.5  | 0.00432  | 2.36443 | 0.66323492 | 0.798636241 | -0.135 |
| cg12980788 | II | 37 | 11 | 55641084                   | 0.58 | 0.00041  | 3.39184 | 0.56674072 | 0.702004037 | -0.135 |

|            |    |    |    |           |                   |      |          |         |            |             |        |
|------------|----|----|----|-----------|-------------------|------|----------|---------|------------|-------------|--------|
| cg25249849 | II | 37 | 11 | 117695486 | FXVD2;FXVD2;FXVD  | 0.5  | 0.00432  | 2.36443 | 0.56053236 | 0.695868435 | -0.135 |
| cg01572652 | II | 37 | 12 | 103695883 | C12orf42;C12orf42 | 0.46 | 0.01197  | 1.92207 | 0.279734   | 0.415202001 | -0.135 |
| cg05404091 | II | 37 | 12 | 133182886 |                   | 0.54 | 0.0014   | 2.85345 | 0.70284103 | 0.567743617 | 0.135  |
| cg17292667 | II | 37 | 13 | 110787523 |                   | 0.58 | 0.00041  | 3.39184 | 0.70147776 | 0.836810291 | -0.135 |
| cg08264895 | II | 37 | 14 | 70060335  |                   | 0.5  | 0.00432  | 2.36443 | 0.65089987 | 0.516002785 | 0.135  |
| cg05859308 | II | 37 | 14 | 71712645  |                   | 0.46 | 0.01197  | 1.92207 | 0.67640139 | 0.54184975  | 0.135  |
| cg13754877 | II | 37 | 14 | 101943654 |                   | 0.5  | 0.00432  | 2.36443 | 0.69220255 | 0.557316845 | 0.135  |
| cg26488183 | II | 37 | 15 | 75195105  | C15orf17          | 0.5  | 0.00432  | 2.36443 | 0.27823638 | 0.412891028 | -0.135 |
| cg00044665 | II | 37 | 16 | 66400411  | CDH5              | 0.67 | 2.34E-05 | 4.63072 | 0.30004619 | 0.435295555 | -0.135 |
| cg07248223 | I  | 37 | 17 | 38717275  | CCR7              | 0.58 | 0.00057  | 3.24571 | 0.20837639 | 0.073849235 | 0.135  |
| cg03244997 | II | 37 | 17 | 43503144  | ARHGAP27          | 0.5  | 0.00432  | 2.36443 | 0.34788441 | 0.48260473  | -0.135 |
| cg26933683 | II | 37 | 17 | 61918738  | SMARCD2;SMARCD    | 0.5  | 0.00432  | 2.36443 | 0.38826851 | 0.25368136  | 0.135  |
| cg26928788 | II | 37 | 17 | 76973328  | LGALS3BP          | 0.42 | 0.02991  | 1.52413 | 0.53110232 | 0.396349748 | 0.135  |
| cg00504599 | II | 37 | 17 | 79428036  | BAHCC1            | 0.5  | 0.00432  | 2.36443 | 0.49434593 | 0.629395774 | -0.135 |
| cg24431966 | II | 37 | 17 | 79801787  | P4HB              | 0.62 | 0.0001   | 3.98291 | 0.71777416 | 0.852727751 | -0.135 |
| cg06360427 | I  | 37 | 18 | 74962672  | GALR1             | 0.5  | 0.00432  | 2.36443 | 0.12912066 | 0.263881957 | -0.135 |
| cg05345154 | I  | 37 | 19 | 2250901   | AMH               | 0.42 | 0.02991  | 1.52413 | 0.22644896 | 0.361889531 | -0.135 |
| cg08196968 | I  | 37 | 19 | 38746749  | PPP1R14A          | 0.58 | 0.00041  | 3.39184 | 0.37551369 | 0.240113167 | 0.135  |
| cg05670991 | II | 37 | 19 | 51628115  | SIGLEC9           | 0.58 | 0.00041  | 3.39184 | 0.3385565  | 0.473574312 | -0.135 |
| cg19853760 | II | 37 | 22 | 38071677  | LGALS1;LGALS1     | 0.54 | 0.0014   | 2.85345 | 0.38134769 | 0.516583209 | -0.135 |
| cg24424889 | II | 37 | 22 | 39494175  | APOBEC3H;APOBEC   | 0.42 | 0.02991  | 1.52413 | 0.68040644 | 0.545286172 | 0.135  |
| cg17194270 | II | 37 | 22 | 39759992  | SYNGR1;SYNGR1;SY  | 0.54 | 0.0014   | 2.85345 | 0.51962515 | 0.654394917 | -0.135 |
| cg19159092 | II | 37 | 1  | 856059    | FLJ39609          | 0.54 | 0.0014   | 2.85345 | 0.36969758 | 0.235456657 | 0.134  |
| cg03265564 | II | 37 | 1  | 9748971   | PIK3CD            | 0.5  | 0.00432  | 2.36443 | 0.72519404 | 0.591371255 | 0.134  |
| cg03769939 | I  | 37 | 1  | 25254129  | RUNX3;RUNX3       | 0.54 | 0.0014   | 2.85345 | 0.83077732 | 0.696307529 | 0.134  |
| cg01523881 | II | 37 | 1  | 200985689 | KIF21B            | 0.58 | 0.00041  | 3.39184 | 0.22462401 | 0.35885733  | -0.134 |
| cg06233202 | II | 37 | 2  | 64501134  |                   | 0.58 | 0.00041  | 3.39184 | 0.25410965 | 0.387787944 | -0.134 |
| cg19051213 | I  | 37 | 2  | 128281334 | IWS1              | 0.46 | 0.01197  | 1.92207 | 0.75881071 | 0.625029974 | 0.134  |
| cg22033586 | II | 37 | 2  | 157292113 | GPD2;GPD2;GPD2    | 0.5  | 0.00432  | 2.36443 | 0.20539829 | 0.339028065 | -0.134 |
| cg12073466 | II | 37 | 2  | 173069253 |                   | 0.5  | 0.00432  | 2.36443 | 0.7736573  | 0.908051968 | -0.134 |
| cg01786048 | II | 37 | 2  | 239035964 | ESPNL             | 0.42 | 0.02991  | 1.52413 | 0.25862186 | 0.392480162 | -0.134 |
| cg09690215 | II | 37 | 2  | 241216697 |                   | 0.58 | 0.00041  | 3.39184 | 0.6325356  | 0.498225036 | 0.134  |
| cg25585279 | II | 37 | 4  | 2763026   |                   | 0.46 | 0.01197  | 1.92207 | 0.63605383 | 0.501813693 | 0.134  |

|            |    |    |    |                            |      |          |         |            |             |        |
|------------|----|----|----|----------------------------|------|----------|---------|------------|-------------|--------|
| cg18371052 | I  | 37 | 5  | 8457721                    | 0.46 | 0.01197  | 1.92207 | 0.42985552 | 0.295487446 | 0.134  |
| cg14815361 | I  | 37 | 5  | 131589552                  | 0.54 | 0.0014   | 2.85345 | 0.70041178 | 0.566673455 | 0.134  |
| cg06033531 | II | 37 | 5  | 176980153 FAM193B;FAM193I  | 0.58 | 0.00041  | 3.39184 | 0.65984311 | 0.794169269 | -0.134 |
| cg14029759 | II | 37 | 6  | 5764816 FARS2              | 0.42 | 0.02991  | 1.52413 | 0.72517642 | 0.591278567 | 0.134  |
| cg13500852 | II | 37 | 6  | 15505460 JARID2            | 0.67 | 2.34E-05 | 4.63072 | 0.65471401 | 0.788413661 | -0.134 |
| cg26655361 | II | 37 | 6  | 28323128 ZNF323;ZKSCAN3;Z  | 0.54 | 0.0014   | 2.85345 | 0.66270049 | 0.796318826 | -0.134 |
| cg10661769 | I  | 37 | 6  | 30881484 VARS2;VARS2;VARS  | 0.46 | 0.01197  | 1.92207 | 0.47601427 | 0.341961505 | 0.134  |
| cg03499675 | II | 37 | 6  | 31744339 C6orf27           | 0.71 | 4.57E-06 | 5.34042 | 0.39456389 | 0.528343853 | -0.134 |
| cg17568962 | II | 37 | 6  | 35456312 TEAD3             | 0.54 | 0.0014   | 2.85345 | 0.25857444 | 0.393010036 | -0.134 |
| cg27250236 | I  | 37 | 6  | 48036617 C6orf138          | 0.5  | 0.00432  | 2.36443 | 0.20789096 | 0.342297445 | -0.134 |
| cg15506609 | I  | 37 | 7  | 27206073 HOXA9             | 0.46 | 0.01197  | 1.92207 | 0.18280628 | 0.317072869 | -0.134 |
| cg19198358 | II | 37 | 8  | 1725179 CLN8               | 0.58 | 0.00041  | 3.39184 | 0.72053089 | 0.854854659 | -0.134 |
| cg23303108 | I  | 37 | 8  | 23083578 TNFRSF10A         | 0.46 | 0.01197  | 1.92207 | 0.81728194 | 0.683207797 | 0.134  |
| cg27443224 | II | 37 | 9  | 34710135 CCL21;CCL21       | 0.42 | 0.02991  | 1.52413 | 0.45431093 | 0.588089346 | -0.134 |
| cg09501025 | II | 37 | 10 | 73312955 CDH23;CDH23       | 0.5  | 0.00432  | 2.36443 | 0.76072831 | 0.62698926  | 0.134  |
| cg05379597 | II | 37 | 10 | 75627144 CAMK2G;CAMK2G;    | 0.58 | 0.00041  | 3.39184 | 0.64051007 | 0.774617851 | -0.134 |
| cg12069540 | II | 37 | 10 | 82173570 C10orf58;C10orf58 | 0.54 | 0.0014   | 2.85345 | 0.55574929 | 0.68932131  | -0.134 |
| cg07535628 | II | 37 | 11 | 829035 EFCAB4A             | 0.62 | 0.0001   | 3.98291 | 0.59034422 | 0.724041724 | -0.134 |
| cg26071135 | II | 37 | 11 | 843943 TSPAN4;TSPAN4;TS    | 0.62 | 0.0001   | 3.98291 | 0.23360908 | 0.367772241 | -0.134 |
| cg01199327 | I  | 37 | 11 | 44626750 CD82;CD82         | 0.54 | 0.0014   | 2.85345 | 0.54018527 | 0.405893867 | 0.134  |
| cg24524285 | I  | 37 | 11 | 64405919 NRXN2;NRXN2;NRX   | 0.54 | 0.0014   | 2.85345 | 0.56121767 | 0.426869331 | 0.134  |
| cg05235171 | II | 37 | 11 | 117958104 TMPRSS4;TMPRSS4  | 0.62 | 0.0001   | 3.98291 | 0.58505317 | 0.718898921 | -0.134 |
| cg20001810 | II | 37 | 12 | 52829316 KRT75             | 0.5  | 0.00432  | 2.36443 | 0.6949184  | 0.560979954 | 0.134  |
| cg05758804 | II | 37 | 12 | 57917389 MBD6              | 0.67 | 2.34E-05 | 4.63072 | 0.18185289 | 0.31542075  | -0.134 |
| cg19190762 | II | 37 | 13 | 44806055                   | 0.58 | 0.00041  | 3.39184 | 0.73063549 | 0.597018228 | 0.134  |
| cg13688202 | II | 37 | 14 | 65230287 SPTB              | 0.42 | 0.02991  | 1.52413 | 0.47015656 | 0.335775582 | 0.134  |
| cg16650630 | II | 37 | 15 | 40364862                   | 0.42 | 0.02991  | 1.52413 | 0.44690604 | 0.581143936 | -0.134 |
| cg13045913 | II | 37 | 15 | 41100308 DNAJC17;ZFYVE19   | 0.42 | 0.02991  | 1.52413 | 0.13291263 | 0.266657014 | -0.134 |
| cg23737062 | I  | 37 | 15 | 63894296 FBXL22            | 0.62 | 0.0001   | 3.98291 | 0.5092406  | 0.375100942 | 0.134  |
| cg12057576 | II | 37 | 15 | 78918529 CHRN4             | 0.54 | 0.0014   | 2.85345 | 0.66981543 | 0.535457822 | 0.134  |
| cg01054354 | II | 37 | 15 | 100272751 LYSD4            | 0.58 | 0.00041  | 3.39184 | 0.48096594 | 0.615154448 | -0.134 |
| cg00201760 | II | 37 | 16 | 28518385 IL27              | 0.46 | 0.01197  | 1.92207 | 0.31687632 | 0.450489587 | -0.134 |
| cg27152190 | II | 37 | 16 | 50096867                   | 0.58 | 0.00041  | 3.39184 | 0.79766387 | 0.66403626  | 0.134  |

|            |    |    |    |                            |      |         |         |            |             |        |
|------------|----|----|----|----------------------------|------|---------|---------|------------|-------------|--------|
| cg04172533 | II | 37 | 16 | 50743027 NOD2              | 0.42 | 0.02991 | 1.52413 | 0.29044369 | 0.424019016 | -0.134 |
| cg06835772 | II | 37 | 16 | 85296220                   | 0.58 | 0.00041 | 3.39184 | 0.33047636 | 0.464090857 | -0.134 |
| cg07543400 | II | 37 | 17 | 3824384                    | 0.46 | 0.01197 | 1.92207 | 0.4424189  | 0.308439647 | 0.134  |
| cg24251850 | II | 37 | 17 | 8815841 PIK3R5;PIK3R5      | 0.58 | 0.00041 | 3.39184 | 0.76037504 | 0.626789968 | 0.134  |
| cg26673195 | II | 37 | 17 | 41052729 G6PC              | 0.46 | 0.01197 | 1.92207 | 0.67072838 | 0.536962905 | 0.134  |
| cg23643375 | II | 37 | 17 | 45933306 SP6               | 0.58 | 0.00041 | 3.39184 | 0.69604527 | 0.830469317 | -0.134 |
| cg02240252 | II | 37 | 17 | 47931591                   | 0.54 | 0.0014  | 2.85345 | 0.60383609 | 0.738260788 | -0.134 |
| cg19134130 | II | 37 | 17 | 72830151 TMEM104           | 0.42 | 0.02991 | 1.52413 | 0.57635838 | 0.442027546 | 0.134  |
| cg21373806 | I  | 37 | 17 | 79419834 BAHCC1            | 0.54 | 0.0014  | 2.85345 | 0.60714739 | 0.472724338 | 0.134  |
| cg15229496 | II | 37 | 18 | 45939850                   | 0.58 | 0.00041 | 3.39184 | 0.6061716  | 0.739901716 | -0.134 |
| cg24304425 | II | 37 | 19 | 840985 PRTN3;PRTN3         | 0.62 | 0.0001  | 3.98291 | 0.32415438 | 0.458235758 | -0.134 |
| cg24866700 | II | 37 | 19 | 2235103 MIR1227;PLEKHJ1    | 0.46 | 0.01197 | 1.92207 | 0.33038914 | 0.464612976 | -0.134 |
| cg08006956 | II | 37 | 19 | 18418056 LSM4              | 0.62 | 0.0001  | 3.98291 | 0.69858851 | 0.564954757 | 0.134  |
| cg24074448 | I  | 37 | 19 | 18768688 KLHL26            | 0.58 | 0.00041 | 3.39184 | 0.61421311 | 0.479930789 | 0.134  |
| cg10665321 | I  | 37 | 19 | 19221392 SLC25A42          | 0.5  | 0.00432 | 2.36443 | 0.26600845 | 0.131882271 | 0.134  |
| cg21965980 | II | 37 | 19 | 35614992 FXYD3;FXYD3;FXYD  | 0.42 | 0.02991 | 1.52413 | 0.60834117 | 0.474047759 | 0.134  |
| cg19648552 | I  | 37 | 19 | 56200391 EPN1;EPN1;EPN1    | 0.58 | 0.00041 | 3.39184 | 0.66409948 | 0.530139988 | 0.134  |
| cg27391267 | I  | 37 | 19 | 58545333 ZSCAN1            | 0.46 | 0.01197 | 1.92207 | 0.10310951 | 0.237174631 | -0.134 |
| cg11284582 | II | 37 | 20 | 62270540                   | 0.54 | 0.0014  | 2.85345 | 0.29215544 | 0.157968965 | 0.134  |
| cg13299324 | I  | 37 | 21 | 40145949 NCRNA00114        | 0.42 | 0.02991 | 1.52413 | 0.82741289 | 0.693058493 | 0.134  |
| cg23205858 | II | 37 | 22 | 21088806 PI4KA;PI4KA       | 0.54 | 0.0014  | 2.85345 | 0.52954406 | 0.663766579 | -0.134 |
| cg11163555 | II | 37 | 22 | 31736976 PATZ1;PATZ1;PATZ  | 0.46 | 0.01197 | 1.92207 | 0.39229721 | 0.525970836 | -0.134 |
| cg17908947 | II | 37 | 22 | 38600334 MAFF;MAFF;MAFF;   | 0.54 | 0.0014  | 2.85345 | 0.58464949 | 0.45042529  | 0.134  |
| cg01800148 | II | 37 | 1  | 9130886 SLC2A5;SLC2A5;SLC  | 0.42 | 0.02991 | 1.52413 | 0.77537909 | 0.641935248 | 0.133  |
| cg20680726 | I  | 37 | 1  | 12254723 TNFRSF1B          | 0.62 | 0.0001  | 3.98291 | 0.62664071 | 0.75917741  | -0.133 |
| cg00426377 | II | 37 | 1  | 36785859 C1orf113;C1orf113 | 0.46 | 0.01197 | 1.92207 | 0.40653249 | 0.539258826 | -0.133 |
| cg23217983 | II | 37 | 1  | 67018825 SGIP1             | 0.5  | 0.00432 | 2.36443 | 0.70753368 | 0.574282487 | 0.133  |
| cg05941840 | II | 37 | 1  | 94074034 BCAR3             | 0.5  | 0.00432 | 2.36443 | 0.83019223 | 0.697288006 | 0.133  |
| cg12200412 | II | 37 | 1  | 158324331 CD1E;CD1E;CD1E;C | 0.42 | 0.02991 | 1.52413 | 0.65269642 | 0.785747263 | -0.133 |
| cg22449085 | II | 37 | 1  | 201392102 TNNI1            | 0.54 | 0.0014  | 2.85345 | 0.81861503 | 0.685852616 | 0.133  |
| cg08161480 | II | 37 | 1  | 226114565                  | 0.54 | 0.0014  | 2.85345 | 0.55749354 | 0.690279293 | -0.133 |
| cg20991420 | II | 37 | 2  | 173061715                  | 0.46 | 0.01197 | 1.92207 | 0.19933999 | 0.332310483 | -0.133 |
| cg12001120 | II | 37 | 2  | 219751342 WNT10A           | 0.46 | 0.01197 | 1.92207 | 0.66664145 | 0.533180318 | 0.133  |

|            |    |    |    |           |                 |      |          |         |            |             |        |
|------------|----|----|----|-----------|-----------------|------|----------|---------|------------|-------------|--------|
| cg06574960 | II | 37 | 2  | 232265084 | B3GNT7          | 0.5  | 0.00432  | 2.36443 | 0.64445647 | 0.777755298 | -0.133 |
| cg01997813 | I  | 37 | 2  | 242710939 |                 | 0.71 | 4.57E-06 | 5.34042 | 0.76591373 | 0.898590024 | -0.133 |
| cg01832712 | II | 37 | 3  | 4910674   |                 | 0.46 | 0.01197  | 1.92207 | 0.21277128 | 0.34593605  | -0.133 |
| cg02316506 | II | 37 | 3  | 42694803  | ZBTB47          | 0.46 | 0.01197  | 1.92207 | 0.40565225 | 0.538575436 | -0.133 |
| cg06240200 | II | 37 | 3  | 46974965  | CCDC12          | 0.54 | 0.0014   | 2.85345 | 0.81616344 | 0.682694574 | 0.133  |
| cg17546247 | II | 37 | 3  | 147125714 | ZIC4;ZIC1       | 0.67 | 2.34E-05 | 4.63072 | 0.34582994 | 0.47893824  | -0.133 |
| cg07064537 | II | 37 | 3  | 171515212 | PLD1;PLD1       | 0.54 | 0.0014   | 2.85345 | 0.6968605  | 0.563995625 | 0.133  |
| cg01310397 | II | 37 | 3  | 195490033 | MUC4;MUC4;MUC4  | 0.54 | 0.0014   | 2.85345 | 0.73521091 | 0.867824231 | -0.133 |
| cg26860935 | I  | 37 | 4  | 1407989   |                 | 0.58 | 0.00041  | 3.39184 | 0.12788987 | 0.261113599 | -0.133 |
| cg11168104 | I  | 37 | 5  | 1857477   |                 | 0.54 | 0.0014   | 2.85345 | 0.64804331 | 0.781080345 | -0.133 |
| cg26655340 | II | 37 | 5  | 154230141 | C5orf4;C5orf4   | 0.46 | 0.01197  | 1.92207 | 0.20025119 | 0.333578635 | -0.133 |
| cg23963071 | II | 37 | 6  | 2901712   | SERPINB9        | 0.5  | 0.00432  | 2.36443 | 0.61455325 | 0.481713597 | 0.133  |
| cg06499368 | II | 37 | 6  | 6725372   |                 | 0.54 | 0.0014   | 2.85345 | 0.6493233  | 0.782439696 | -0.133 |
| cg06473288 | II | 37 | 6  | 32820102  | TAP1            | 0.46 | 0.01197  | 1.92207 | 0.80398257 | 0.671025708 | 0.133  |
| cg06885468 | II | 37 | 6  | 158129101 |                 | 0.62 | 0.0001   | 3.98291 | 0.51329498 | 0.646017092 | -0.133 |
| cg08352774 | II | 37 | 6  | 158985825 | TMEM181         | 0.42 | 0.02991  | 1.52413 | 0.16203725 | 0.295281919 | -0.133 |
| cg02072875 | II | 37 | 7  | 2606796   | IQCE;IQCE       | 0.5  | 0.00432  | 2.36443 | 0.80960312 | 0.676787807 | 0.133  |
| cg00232092 | II | 37 | 7  | 5518887   | FBXL18          | 0.46 | 0.01197  | 1.92207 | 0.58962097 | 0.722376724 | -0.133 |
| cg26966828 | I  | 37 | 8  | 10208257  | MSRA;MSRA;MSRA  | 0.42 | 0.02991  | 1.52413 | 0.07865419 | 0.21209538  | -0.133 |
| cg02929961 | II | 37 | 8  | 22525659  | BIN3            | 0.5  | 0.00432  | 2.36443 | 0.77089516 | 0.637767034 | 0.133  |
| cg16625218 | II | 37 | 8  | 30272502  | RBPMS;RBPMS;RBF | 0.46 | 0.01197  | 1.92207 | 0.66112384 | 0.528111858 | 0.133  |
| cg15450349 | I  | 37 | 8  | 42269042  |                 | 0.58 | 0.00041  | 3.39184 | 0.75307923 | 0.885761179 | -0.133 |
| cg10806146 | I  | 37 | 8  | 42356871  | SLC20A2         | 0.5  | 0.00432  | 2.36443 | 0.14830195 | 0.2809467   | -0.133 |
| cg14424376 | II | 37 | 9  | 98513318  |                 | 0.54 | 0.0014   | 2.85345 | 0.64758385 | 0.514705897 | 0.133  |
| cg13403259 | II | 37 | 9  | 123145884 |                 | 0.5  | 0.00432  | 2.36443 | 0.61931184 | 0.486805841 | 0.133  |
| cg14446165 | I  | 37 | 9  | 136833899 | VAV2;VAV2       | 0.58 | 0.00041  | 3.39184 | 0.72034057 | 0.587396847 | 0.133  |
| cg14186779 | II | 37 | 9  | 139243399 | GPSM1           | 0.42 | 0.02991  | 1.52413 | 0.54294002 | 0.410291632 | 0.133  |
| cg18666379 | II | 37 | 10 | 44503867  |                 | 0.46 | 0.01197  | 1.92207 | 0.80980087 | 0.677009756 | 0.133  |
| cg09924848 | II | 37 | 10 | 126308486 | FAM53B          | 0.46 | 0.01197  | 1.92207 | 0.47728081 | 0.343954288 | 0.133  |
| cg16544463 | I  | 37 | 10 | 134407942 | INPP5A          | 0.75 | 7.61E-07 | 6.11857 | 0.45833522 | 0.324860986 | 0.133  |
| cg26241460 | II | 37 | 11 | 1767775   | HCCA2;LOC402778 | 0.54 | 0.0014   | 2.85345 | 0.67847563 | 0.811172678 | -0.133 |
| cg04085571 | I  | 37 | 11 | 1872753   | LSP1            | 0.54 | 0.0014   | 2.85345 | 0.60782508 | 0.475121841 | 0.133  |
| cg12151545 | II | 37 | 11 | 47373000  | MYBPC3          | 0.54 | 0.0014   | 2.85345 | 0.65595505 | 0.789091505 | -0.133 |

|            |    |    |    |           |                   |      |          |         |            |             |        |
|------------|----|----|----|-----------|-------------------|------|----------|---------|------------|-------------|--------|
| cg11439695 | II | 37 | 12 | 2561024   | CACNA1C;CACNA1C   | 0.5  | 0.00432  | 2.36443 | 0.67622234 | 0.543308747 | 0.133  |
| cg05484458 | II | 37 | 12 | 6949260   | GNB3              | 0.5  | 0.00432  | 2.36443 | 0.6672109  | 0.53447012  | 0.133  |
| cg06872313 | I  | 37 | 12 | 14413185  |                   | 0.5  | 0.00432  | 2.36443 | 0.43132113 | 0.564552651 | -0.133 |
| cg13696135 | II | 37 | 12 | 49396782  | PRKAG1;PRKAG1     | 0.42 | 0.02991  | 1.52413 | 0.71254471 | 0.579138335 | 0.133  |
| cg02317313 | I  | 37 | 12 | 122235206 | LOC338799         | 0.62 | 0.0001   | 3.98291 | 0.7164051  | 0.849241225 | -0.133 |
| cg05336395 | I  | 37 | 13 | 53421688  | PCDH8;PCDH8       | 0.5  | 0.00432  | 2.36443 | 0.29624591 | 0.428982803 | -0.133 |
| cg11997468 | I  | 37 | 13 | 114834922 | RASA3             | 0.54 | 0.0014   | 2.85345 | 0.65188613 | 0.785153364 | -0.133 |
| cg13038618 | II | 37 | 14 | 77467391  |                   | 0.42 | 0.02991  | 1.52413 | 0.29389979 | 0.160782652 | 0.133  |
| cg00905584 | I  | 37 | 14 | 105058234 |                   | 0.46 | 0.01197  | 1.92207 | 0.77082091 | 0.638243803 | 0.133  |
| cg08959144 | II | 37 | 16 | 29141694  |                   | 0.46 | 0.01197  | 1.92207 | 0.34111459 | 0.474511642 | -0.133 |
| cg10104480 | II | 37 | 16 | 72955250  | ZFH3;ZFH3         | 0.54 | 0.0014   | 2.85345 | 0.34484174 | 0.478064675 | -0.133 |
| cg02637247 | II | 37 | 16 | 86524562  |                   | 0.5  | 0.00432  | 2.36443 | 0.66223958 | 0.529139841 | 0.133  |
| cg08565003 | I  | 37 | 16 | 87447920  | ZCCHC14           | 0.58 | 0.00041  | 3.39184 | 0.8645534  | 0.731970269 | 0.133  |
| cg00031162 | II | 37 | 17 | 7453377   | TNFSF12;TNFSF12-1 | 0.46 | 0.01197  | 1.92207 | 0.72662948 | 0.594100783 | 0.133  |
| cg05508862 | II | 37 | 17 | 18885437  | SLC5A10;FAM83G;S  | 0.54 | 0.0014   | 2.85345 | 0.41811389 | 0.550911749 | -0.133 |
| cg24069602 | I  | 37 | 17 | 62045522  | SCN4A             | 0.46 | 0.01197  | 1.92207 | 0.70042418 | 0.567624736 | 0.133  |
| cg16736055 | II | 37 | 17 | 72028714  |                   | 0.58 | 0.00041  | 3.39184 | 0.7920197  | 0.659351397 | 0.133  |
| cg06094707 | II | 37 | 17 | 78445867  | NPTX1             | 0.54 | 0.0014   | 2.85345 | 0.44020996 | 0.307641684 | 0.133  |
| cg01810575 | II | 37 | 17 | 79415682  | BAHCC1            | 0.42 | 0.02991  | 1.52413 | 0.42998598 | 0.297067518 | 0.133  |
| cg17069873 | II | 37 | 19 | 40732784  | CNTD2             | 0.62 | 0.0001   | 3.98291 | 0.36862133 | 0.501691861 | -0.133 |
| cg13407883 | II | 37 | 19 | 51627843  | SIGLEC9           | 0.54 | 0.0014   | 2.85345 | 0.68051814 | 0.813803676 | -0.133 |
| cg18471488 | I  | 37 | 20 | 30105550  | HM13;HM13;HM13    | 0.67 | 2.34E-05 | 4.63072 | 0.51521812 | 0.648568653 | -0.133 |
| cg05085169 | I  | 37 | 20 | 61443751  | OGFR              | 0.54 | 0.0014   | 2.85345 | 0.81881815 | 0.952301476 | -0.133 |
| cg14505256 | II | 37 | 22 | 20978594  |                   | 0.58 | 0.00041  | 3.39184 | 0.81517621 | 0.682409165 | 0.133  |
| cg04392554 | I  | 37 | 22 | 46685472  | TTC38             | 0.5  | 0.00432  | 2.36443 | 0.95721438 | 0.824340652 | 0.133  |
| cg20995573 | II | 37 | 22 | 51038379  | MAPK8IP2          | 0.67 | 2.34E-05 | 4.63072 | 0.1765756  | 0.309727405 | -0.133 |
| cg22123711 | II | 37 | 1  | 12185845  | TNFRSF8;TNFRSF8   | 0.54 | 0.0014   | 2.85345 | 0.68694712 | 0.819076821 | -0.132 |
| cg00664416 | I  | 37 | 1  | 38261192  | MANEAL;MANEAL;I   | 0.5  | 0.00432  | 2.36443 | 0.27794058 | 0.409594951 | -0.132 |
| cg03884592 | II | 37 | 1  | 42384474  | HIVEP3;HIVEP3;HIV | 0.42 | 0.02991  | 1.52413 | 0.22939352 | 0.361841789 | -0.132 |
| cg13390284 | II | 37 | 1  | 65531864  |                   | 0.46 | 0.01197  | 1.92207 | 0.58443203 | 0.716550163 | -0.132 |
| cg26833883 | II | 37 | 1  | 154965572 | FLAD1;LENEP;FLAD  | 0.5  | 0.00432  | 2.36443 | 0.30669915 | 0.438488215 | -0.132 |
| cg21022868 | II | 37 | 1  | 159923861 | SLAMF9;SLAMF9;SL  | 0.54 | 0.0014   | 2.85345 | 0.70121755 | 0.569687187 | 0.132  |
| cg03040292 | II | 37 | 1  | 200847096 |                   | 0.42 | 0.02991  | 1.52413 | 0.75155324 | 0.619118544 | 0.132  |

|            |    |    |    |           |                 |      |          |         |            |             |        |
|------------|----|----|----|-----------|-----------------|------|----------|---------|------------|-------------|--------|
| cg26841040 | II | 37 | 1  | 228332263 | GUK1;GUK1;GUK1  | 0.42 | 0.02991  | 1.52413 | 0.47913855 | 0.347223232 | 0.132  |
| cg12167564 | II | 37 | 1  | 236047034 |                 | 0.46 | 0.01197  | 1.92207 | 0.49419963 | 0.626032792 | -0.132 |
| cg14021880 | II | 37 | 2  | 27301369  | EMILIN1         | 0.67 | 2.34E-05 | 4.63072 | 0.57014816 | 0.702369905 | -0.132 |
| cg23432368 | II | 37 | 2  | 47882601  |                 | 0.5  | 0.00432  | 2.36443 | 0.62960505 | 0.497173518 | 0.132  |
| cg03198066 | II | 37 | 2  | 159311068 | CCDC148;CCDC148 | 0.54 | 0.0014   | 2.85345 | 0.3260031  | 0.458300539 | -0.132 |
| cg09128944 | II | 37 | 2  | 169967580 |                 | 0.62 | 0.0001   | 3.98291 | 0.27887196 | 0.411062537 | -0.132 |
| cg10004897 | II | 37 | 4  | 7054700   | TADA2B          | 0.54 | 0.0014   | 2.85345 | 0.22471669 | 0.356848502 | -0.132 |
| cg10198664 | II | 37 | 4  | 83631584  | SCD5;SCD5       | 0.54 | 0.0014   | 2.85345 | 0.64376042 | 0.512120441 | 0.132  |
| cg09473510 | I  | 37 | 4  | 187476573 | MTNR1A          | 0.42 | 0.02991  | 1.52413 | 0.08192677 | 0.213450163 | -0.132 |
| cg04654716 | II | 37 | 5  | 74162924  | FAM169A         | 0.71 | 4.57E-06 | 5.34042 | 0.42911175 | 0.560820292 | -0.132 |
| cg19459094 | II | 37 | 5  | 176856845 | GRK6;GRK6;GRK6  | 0.42 | 0.02991  | 1.52413 | 0.22308161 | 0.354983818 | -0.132 |
| cg14674856 | II | 37 | 5  | 179220274 | LTC4S           | 0.62 | 0.0001   | 3.98291 | 0.47207298 | 0.603764143 | -0.132 |
| cg10126181 | II | 37 | 6  | 21832051  | FLJ22536        | 0.5  | 0.00432  | 2.36443 | 0.17069077 | 0.302854599 | -0.132 |
| cg17604312 | I  | 37 | 6  | 30850829  | DDR1;DDR1       | 0.5  | 0.00432  | 2.36443 | 0.58708801 | 0.454794784 | 0.132  |
| cg21550612 | II | 37 | 6  | 31094185  | PSORS1C1        | 0.54 | 0.0014   | 2.85345 | 0.5538006  | 0.421705527 | 0.132  |
| cg01928820 | II | 37 | 6  | 42883624  | PTCRA           | 0.54 | 0.0014   | 2.85345 | 0.31816068 | 0.185686298 | 0.132  |
| cg14994513 | II | 37 | 6  | 146919932 | C6orf103        | 0.5  | 0.00432  | 2.36443 | 0.19340985 | 0.325031573 | -0.132 |
| cg00775915 | II | 37 | 7  | 580703    |                 | 0.42 | 0.02991  | 1.52413 | 0.55450492 | 0.422581468 | 0.132  |
| cg14405813 | II | 37 | 7  | 139414573 | HIPK2;HIPK2     | 0.46 | 0.01197  | 1.92207 | 0.39075629 | 0.258385531 | 0.132  |
| cg15901999 | II | 37 | 8  | 41682580  | ANK1            | 0.58 | 0.00041  | 3.39184 | 0.72760064 | 0.859505602 | -0.132 |
| cg08598221 | II | 37 | 8  | 121824929 | SNTB1           | 0.58 | 0.00041  | 3.39184 | 0.43830227 | 0.570520135 | -0.132 |
| cg13738729 | II | 37 | 9  | 36989127  | PAX5            | 0.46 | 0.01197  | 1.92207 | 0.35735346 | 0.225115849 | 0.132  |
| cg14473838 | II | 37 | 9  | 131490040 |                 | 0.58 | 0.00041  | 3.39184 | 0.59156661 | 0.459360587 | 0.132  |
| cg12754854 | II | 37 | 9  | 131682859 | PHYHD1;PHYHD1   | 0.5  | 0.00432  | 2.36443 | 0.7894128  | 0.657181228 | 0.132  |
| cg16885557 | II | 37 | 10 | 48601822  |                 | 0.5  | 0.00432  | 2.36443 | 0.81325349 | 0.681126505 | 0.132  |
| cg19207017 | II | 37 | 10 | 104316063 | SUFU            | 0.5  | 0.00432  | 2.36443 | 0.75985019 | 0.891535464 | -0.132 |
| cg25030266 | II | 37 | 10 | 106077741 | ITPRIP          | 0.42 | 0.02991  | 1.52413 | 0.60286312 | 0.471218634 | 0.132  |
| cg23999801 | II | 37 | 10 | 126254661 | LHPP;LHPP       | 0.46 | 0.01197  | 1.92207 | 0.53853785 | 0.406857079 | 0.132  |
| cg27209072 | II | 37 | 10 | 127702584 |                 | 0.58 | 0.00041  | 3.39184 | 0.71163701 | 0.58009153  | 0.132  |
| cg00476955 | II | 37 | 11 | 3648013   | TRPC2           | 0.58 | 0.00041  | 3.39184 | 0.25315922 | 0.385247398 | -0.132 |
| cg09781307 | II | 37 | 11 | 27648324  | BDNFOS          | 0.5  | 0.00432  | 2.36443 | 0.69730952 | 0.565212569 | 0.132  |
| cg16177481 | II | 37 | 11 | 61740158  |                 | 0.54 | 0.0014   | 2.85345 | 0.19942873 | 0.331141407 | -0.132 |
| cg10465696 | II | 37 | 11 | 124767948 | ROBO4           | 0.5  | 0.00432  | 2.36443 | 0.07736933 | 0.209266529 | -0.132 |

|            |    |    |    |           |                     |      |          |         |            |             |        |
|------------|----|----|----|-----------|---------------------|------|----------|---------|------------|-------------|--------|
| cg07690768 | II | 37 | 12 | 32370933  | BICD1;BICD1         | 0.58 | 0.00041  | 3.39184 | 0.69115791 | 0.82359756  | -0.132 |
| cg00026033 | I  | 37 | 12 | 56414490  | IKZF4               | 0.46 | 0.01197  | 1.92207 | 0.3833448  | 0.515627891 | -0.132 |
| cg26244575 | II | 37 | 12 | 76354015  |                     | 0.46 | 0.01197  | 1.92207 | 0.56802766 | 0.436476826 | 0.132  |
| cg00357958 | I  | 37 | 12 | 123215010 | GPR81;GPR81         | 0.5  | 0.00432  | 2.36443 | 0.63950507 | 0.507067281 | 0.132  |
| cg07675647 | II | 37 | 12 | 125359265 |                     | 0.54 | 0.0014   | 2.85345 | 0.29082035 | 0.422543382 | -0.132 |
| cg10583311 | II | 37 | 12 | 133082545 | FBRSL1              | 0.67 | 2.34E-05 | 4.63072 | 0.57306445 | 0.705396231 | -0.132 |
| cg17574785 | II | 37 | 13 | 20933879  |                     | 0.42 | 0.02991  | 1.52413 | 0.7089     | 0.577232342 | 0.132  |
| cg26609631 | I  | 37 | 13 | 28366814  | GSX1;GSX1           | 0.42 | 0.02991  | 1.52413 | 0.07193823 | 0.203827616 | -0.132 |
| cg14332524 | II | 37 | 14 | 65770225  |                     | 0.5  | 0.00432  | 2.36443 | 0.78028194 | 0.648685947 | 0.132  |
| cg13152690 | II | 37 | 14 | 91695017  |                     | 0.5  | 0.00432  | 2.36443 | 0.58287649 | 0.450952091 | 0.132  |
| cg10040594 | I  | 37 | 14 | 93556554  | ITPK1;ITPK1;ITPK1   | 0.46 | 0.01197  | 1.92207 | 0.65764686 | 0.525485698 | 0.132  |
| cg10319640 | II | 37 | 14 | 95090384  | SERPINA3            | 0.58 | 0.00041  | 3.39184 | 0.71460646 | 0.582788116 | 0.132  |
| cg07150062 | I  | 37 | 14 | 104552032 | ASPG                | 0.46 | 0.01197  | 1.92207 | 0.09135278 | 0.223435695 | -0.132 |
| cg16050468 | I  | 37 | 14 | 105011965 |                     | 0.46 | 0.01197  | 1.92207 | 0.68724045 | 0.819504394 | -0.132 |
| cg16279237 | I  | 37 | 14 | 106174668 |                     | 0.46 | 0.01197  | 1.92207 | 0.87918085 | 0.747275439 | 0.132  |
| cg05852824 | II | 37 | 15 | 26543817  |                     | 0.46 | 0.01197  | 1.92207 | 0.69292556 | 0.561355038 | 0.132  |
| cg07994696 | II | 37 | 16 | 11680075  | LITAF;LITAF;LITAF;L | 0.58 | 0.00041  | 3.39184 | 0.52261692 | 0.390187986 | 0.132  |
| cg09685060 | I  | 37 | 16 | 28621286  | SULT1A1;SULT1A1;S   | 0.58 | 0.00041  | 3.39184 | 0.50854645 | 0.640173845 | -0.132 |
| cg09889350 | II | 37 | 16 | 56995813  | CETP                | 0.67 | 2.34E-05 | 4.63072 | 0.52153138 | 0.653721305 | -0.132 |
| cg27229664 | II | 37 | 16 | 85096666  | KIAA0513            | 0.46 | 0.01197  | 1.92207 | 0.56052287 | 0.692822558 | -0.132 |
| cg07450021 | II | 37 | 16 | 85097151  | KIAA0513            | 0.5  | 0.00432  | 2.36443 | 0.67354595 | 0.805489711 | -0.132 |
| cg01830154 | II | 37 | 17 | 1134911   |                     | 0.5  | 0.00432  | 2.36443 | 0.29123753 | 0.423659741 | -0.132 |
| cg03572260 | II | 37 | 17 | 37808339  | STARD3;STARD3;ST    | 0.46 | 0.01197  | 1.92207 | 0.73081691 | 0.862917086 | -0.132 |
| cg04988978 | II | 37 | 17 | 56359578  | MPO                 | 0.46 | 0.01197  | 1.92207 | 0.2792629  | 0.410856657 | -0.132 |
| cg14691671 | II | 37 | 17 | 73642503  | RECQL5;LOC10013(C   | 0.58 | 0.00041  | 3.39184 | 0.3884456  | 0.520660497 | -0.132 |
| cg20923885 | II | 37 | 17 | 75473610  | SEPT9;SEPT9;SEPT9   | 0.46 | 0.01197  | 1.92207 | 0.62247892 | 0.754616441 | -0.132 |
| cg18826274 | II | 37 | 17 | 76335184  |                     | 0.46 | 0.01197  | 1.92207 | 0.60638425 | 0.474247248 | 0.132  |
| cg12654199 | II | 37 | 17 | 78753826  | RPTOR;RPTOR         | 0.58 | 0.00041  | 3.39184 | 0.74626885 | 0.87870176  | -0.132 |
| cg12593411 | II | 37 | 19 | 10213722  | ANGPTL6             | 0.42 | 0.02991  | 1.52413 | 0.37038814 | 0.238473051 | 0.132  |
| cg03272225 | II | 37 | 19 | 17957106  | JAK3                | 0.5  | 0.00432  | 2.36443 | 0.20002972 | 0.331843364 | -0.132 |
| cg05983315 | II | 37 | 19 | 58545837  | ZSCAN1              | 0.58 | 0.00041  | 3.39184 | 0.14263262 | 0.274934378 | -0.132 |
| cg14251267 | II | 37 | 20 | 62406428  | ZBTB46              | 0.46 | 0.01197  | 1.92207 | 0.65148097 | 0.783916965 | -0.132 |
| cg23163200 | II | 37 | 21 | 34186122  | C21orf62;C21orf62   | 0.58 | 0.00041  | 3.39184 | 0.25155453 | 0.383711669 | -0.132 |

|            |    |    |    |           |                   |      |          |         |            |             |        |
|------------|----|----|----|-----------|-------------------|------|----------|---------|------------|-------------|--------|
| cg27477277 | II | 37 | 21 | 45811432  | TRPM2             | 0.54 | 0.0014   | 2.85345 | 0.63038836 | 0.762085748 | -0.132 |
| cg00495443 | II | 37 | 22 | 17568163  | IL17RA            | 0.5  | 0.00432  | 2.36443 | 0.69939312 | 0.831098137 | -0.132 |
| cg18576206 | II | 37 | 22 | 44392384  | SAMM50            | 0.46 | 0.01197  | 1.92207 | 0.31714941 | 0.185392705 | 0.132  |
| cg08471335 | II | 37 | 22 | 46685653  | TTC38             | 0.42 | 0.02991  | 1.52413 | 0.72632258 | 0.594290045 | 0.132  |
| cg08469752 | II | 37 | 22 | 50243719  |                   | 0.42 | 0.02991  | 1.52413 | 0.19695949 | 0.32862969  | -0.132 |
| cg23606775 | II | 37 | 1  | 9790616   | CLSTN1;CLSTN1     | 0.46 | 0.01197  | 1.92207 | 0.59645926 | 0.72727176  | -0.131 |
| cg26528311 | II | 37 | 1  | 38462546  | FHL3              | 0.46 | 0.01197  | 1.92207 | 0.27454486 | 0.405671552 | -0.131 |
| cg01804134 | II | 37 | 1  | 44965140  | RNF220            | 0.42 | 0.02991  | 1.52413 | 0.33407707 | 0.464888693 | -0.131 |
| cg12160664 | II | 37 | 1  | 114521853 | OLFML3            | 0.46 | 0.01197  | 1.92207 | 0.42545362 | 0.55677554  | -0.131 |
| cg09791504 | II | 37 | 1  | 151701849 | C1orf230          | 0.5  | 0.00432  | 2.36443 | 0.53122253 | 0.400050993 | 0.131  |
| cg09036468 | I  | 37 | 1  | 151806893 |                   | 0.54 | 0.0014   | 2.85345 | 0.33432868 | 0.465536357 | -0.131 |
| cg13098855 | II | 37 | 1  | 153588927 | S100A14           | 0.67 | 2.34E-05 | 4.63072 | 0.68276116 | 0.814023377 | -0.131 |
| cg17711527 | II | 37 | 1  | 203734396 | LAX1;LAX1;LAX1;LA | 0.5  | 0.00432  | 2.36443 | 0.46287597 | 0.331559496 | 0.131  |
| cg00609227 | II | 37 | 1  | 226307233 |                   | 0.54 | 0.0014   | 2.85345 | 0.51036578 | 0.378925046 | 0.131  |
| cg15358723 | II | 37 | 1  | 245750662 | KIF26B            | 0.46 | 0.01197  | 1.92207 | 0.64081829 | 0.509449654 | 0.131  |
| cg10960375 | II | 37 | 3  | 42694144  | ZBTB47            | 0.5  | 0.00432  | 2.36443 | 0.30086008 | 0.431616872 | -0.131 |
| cg25445707 | II | 37 | 3  | 46719086  | ALS2CL;ALS2CL     | 0.67 | 2.34E-05 | 4.63072 | 0.53984241 | 0.670463825 | -0.131 |
| cg23487312 | II | 37 | 3  | 62401106  | CADPS;CADPS;CADI  | 0.46 | 0.01197  | 1.92207 | 0.42312244 | 0.291640192 | 0.131  |
| cg12226735 | II | 37 | 3  | 98610584  | DCBLD2            | 0.5  | 0.00432  | 2.36443 | 0.78765137 | 0.656210219 | 0.131  |
| cg09010699 | II | 37 | 3  | 195171693 |                   | 0.58 | 0.00041  | 3.39184 | 0.76732412 | 0.89843369  | -0.131 |
| cg05618934 | I  | 37 | 4  | 1407592   |                   | 0.54 | 0.0014   | 2.85345 | 0.44577245 | 0.577073251 | -0.131 |
| cg06851151 | II | 37 | 5  | 133436368 |                   | 0.67 | 2.34E-05 | 4.63072 | 0.46831335 | 0.337001856 | 0.131  |
| cg14873515 | II | 37 | 5  | 149887461 | NDST1             | 0.54 | 0.0014   | 2.85345 | 0.60995179 | 0.741037926 | -0.131 |
| cg22646937 | II | 37 | 5  | 169816792 | KCNMB1;KCNIP1     | 0.54 | 0.0014   | 2.85345 | 0.45933865 | 0.589955596 | -0.131 |
| cg05869491 | II | 37 | 6  | 209763    |                   | 0.5  | 0.00432  | 2.36443 | 0.73943696 | 0.608729308 | 0.131  |
| cg13064679 | I  | 37 | 6  | 32049953  | TNXB              | 0.46 | 0.01197  | 1.92207 | 0.72066858 | 0.58928825  | 0.131  |
| cg06032479 | I  | 37 | 6  | 32552026  | HLA-DRB1          | 0.46 | 0.01197  | 1.92207 | 0.64890997 | 0.779733673 | -0.131 |
| cg05460965 | II | 37 | 6  | 36645100  | CDKN1A;CDKN1A     | 0.54 | 0.0014   | 2.85345 | 0.56955422 | 0.701021839 | -0.131 |
| cg07436074 | II | 37 | 6  | 162071140 | PARK2;PARK2;PARK  | 0.5  | 0.00432  | 2.36443 | 0.64863609 | 0.517273283 | 0.131  |
| cg05788125 | II | 37 | 6  | 170559721 |                   | 0.62 | 0.0001   | 3.98291 | 0.5066021  | 0.637799315 | -0.131 |
| cg23597162 | II | 37 | 7  | 28102341  | JAZF1             | 0.5  | 0.00432  | 2.36443 | 0.69927546 | 0.830273957 | -0.131 |
| cg11961845 | II | 37 | 7  | 129008179 | AHCYL2;AHCYL2;AF  | 0.5  | 0.00432  | 2.36443 | 0.2220481  | 0.352699915 | -0.131 |
| cg20380768 | II | 37 | 7  | 130125511 | MEST              | 0.5  | 0.00432  | 2.36443 | 0.79184909 | 0.661274498 | 0.131  |

|            |    |    |    |           |                  |      |          |         |            |             |        |
|------------|----|----|----|-----------|------------------|------|----------|---------|------------|-------------|--------|
| cg07963670 | II | 37 | 8  | 23161764  | LOXL2            | 0.5  | 0.00432  | 2.36443 | 0.4095778  | 0.27848539  | 0.131  |
| cg15936066 | II | 37 | 8  | 42356637  | SLC20A2          | 0.5  | 0.00432  | 2.36443 | 0.2900511  | 0.421229371 | -0.131 |
| cg20076442 | II | 37 | 8  | 72745197  |                  | 0.54 | 0.0014   | 2.85345 | 0.41097674 | 0.542127006 | -0.131 |
| cg17783213 | II | 37 | 8  | 139883385 | COL22A1          | 0.46 | 0.01197  | 1.92207 | 0.75644427 | 0.625228811 | 0.131  |
| cg12073251 | II | 37 | 8  | 141568652 | EIF2C2;EIF2C2    | 0.46 | 0.01197  | 1.92207 | 0.46551891 | 0.597007486 | -0.131 |
| cg08962185 | II | 37 | 8  | 143336052 | TSNARE1          | 0.5  | 0.00432  | 2.36443 | 0.2790294  | 0.14837846  | 0.131  |
| cg14390143 | II | 37 | 9  | 97095135  |                  | 0.5  | 0.00432  | 2.36443 | 0.47736745 | 0.608162183 | -0.131 |
| cg23016776 | II | 37 | 10 | 99081496  | FRAT1;FRAT1      | 0.42 | 0.02991  | 1.52413 | 0.4403839  | 0.571466657 | -0.131 |
| cg09504612 | II | 37 | 10 | 116467988 |                  | 0.5  | 0.00432  | 2.36443 | 0.68745833 | 0.556525885 | 0.131  |
| cg05971678 | I  | 37 | 10 | 125770089 | CHST15           | 0.67 | 2.34E-05 | 4.63072 | 0.81934334 | 0.950695402 | -0.131 |
| cg23202388 | II | 37 | 11 | 914849    | CHID1;CHID1      | 0.79 | 1.06E-07 | 6.97389 | 0.61775708 | 0.74834295  | -0.131 |
| cg08066376 | II | 37 | 11 | 59577361  | MRPL16           | 0.67 | 2.34E-05 | 4.63072 | 0.45237773 | 0.583714729 | -0.131 |
| cg23220439 | II | 37 | 11 | 66104481  | RIN1             | 0.54 | 0.0014   | 2.85345 | 0.6346364  | 0.503189532 | 0.131  |
| cg08870587 | I  | 37 | 11 | 70455278  | SHANK2;SHANK2    | 0.58 | 0.00041  | 3.39184 | 0.69471321 | 0.825996874 | -0.131 |
| cg05975710 | II | 37 | 11 | 73078836  | ARHGEF17         | 0.58 | 0.00041  | 3.39184 | 0.48686595 | 0.355855043 | 0.131  |
| cg01212326 | II | 37 | 11 | 111250286 | POU2AF1          | 0.54 | 0.0014   | 2.85345 | 0.22938224 | 0.098664353 | 0.131  |
| cg07690882 | II | 37 | 11 | 128694303 |                  | 0.5  | 0.00432  | 2.36443 | 0.25755312 | 0.38868643  | -0.131 |
| cg01511480 | II | 37 | 12 | 6471251   | SCNN1A;SCNN1A;S  | 0.62 | 0.0001   | 3.98291 | 0.67629799 | 0.807755071 | -0.131 |
| cg23348081 | II | 37 | 12 | 14413690  |                  | 0.5  | 0.00432  | 2.36443 | 0.66079559 | 0.792116255 | -0.131 |
| cg13984040 | II | 37 | 12 | 125258948 |                  | 0.54 | 0.0014   | 2.85345 | 0.34668106 | 0.477304714 | -0.131 |
| cg06555661 | II | 37 | 12 | 132259779 | SFRS8            | 0.42 | 0.02991  | 1.52413 | 0.87164313 | 0.740289452 | 0.131  |
| cg03992114 | II | 37 | 13 | 113343376 | ATP11A;ATP11A    | 0.46 | 0.01197  | 1.92207 | 0.33721179 | 0.468196636 | -0.131 |
| cg02181506 | II | 37 | 14 | 94856984  | SERPINA1;SERPINA | 0.58 | 0.00041  | 3.39184 | 0.22111661 | 0.352363476 | -0.131 |
| cg15933120 | II | 37 | 14 | 102102737 |                  | 0.42 | 0.02991  | 1.52413 | 0.76673561 | 0.635422646 | 0.131  |
| cg19994779 | II | 37 | 14 | 105482622 | CDCA4;CDCA4      | 0.58 | 0.00041  | 3.39184 | 0.38825546 | 0.519208669 | -0.131 |
| cg15144068 | II | 37 | 14 | 106321751 |                  | 0.58 | 0.00041  | 3.39184 | 0.6389839  | 0.508316203 | 0.131  |
| cg11869499 | II | 37 | 15 | 89872984  | POLG;POLG        | 0.42 | 0.02991  | 1.52413 | 0.30114133 | 0.432516258 | -0.131 |
| cg05515414 | II | 37 | 16 | 21511211  | LOC100271836     | 0.54 | 0.0014   | 2.85345 | 0.25489539 | 0.124193009 | 0.131  |
| cg09529437 | II | 37 | 16 | 24136792  | PRKCB;PRKCB      | 0.46 | 0.01197  | 1.92207 | 0.29533497 | 0.426030752 | -0.131 |
| cg26907472 | II | 37 | 16 | 69006828  | TMCO7            | 0.58 | 0.00041  | 3.39184 | 0.65717474 | 0.787885922 | -0.131 |
| cg20021790 | II | 37 | 17 | 181288    | RPH3AL           | 0.5  | 0.00432  | 2.36443 | 0.37508692 | 0.506307495 | -0.131 |
| cg17224892 | II | 37 | 17 | 1094496   |                  | 0.58 | 0.00041  | 3.39184 | 0.39609247 | 0.527199006 | -0.131 |
| cg11964099 | II | 37 | 17 | 3905835   |                  | 0.5  | 0.00432  | 2.36443 | 0.55152854 | 0.682375266 | -0.131 |

|            |    |    |    |                           |      |         |         |            |             |        |
|------------|----|----|----|---------------------------|------|---------|---------|------------|-------------|--------|
| cg14692950 | II | 37 | 17 | 7644073 DNAH2             | 0.42 | 0.02991 | 1.52413 | 0.65665673 | 0.787893784 | -0.131 |
| cg21187669 | II | 37 | 17 | 17929033 ATPAF2           | 0.5  | 0.00432 | 2.36443 | 0.55884491 | 0.69009964  | -0.131 |
| cg21605283 | II | 37 | 17 | 30615925 RHBDL3           | 0.42 | 0.02991 | 1.52413 | 0.21984304 | 0.351103461 | -0.131 |
| cg01890568 | I  | 37 | 17 | 31437649 ACCN1;ACCN1      | 0.5  | 0.00432 | 2.36443 | 0.83858439 | 0.707908989 | 0.131  |
| cg11420633 | II | 37 | 17 | 39150330 KRTAP3-3         | 0.5  | 0.00432 | 2.36443 | 0.53553971 | 0.404972263 | 0.131  |
| cg16672637 | II | 37 | 17 | 74138356 FOXJ1            | 0.54 | 0.0014  | 2.85345 | 0.48702867 | 0.618093102 | -0.131 |
| cg09803959 | II | 37 | 17 | 78865514 RPTOR;RPTOR      | 0.5  | 0.00432 | 2.36443 | 0.230223   | 0.361209126 | -0.131 |
| cg17831694 | I  | 37 | 17 | 78929900 RPTOR;RPTOR      | 0.5  | 0.00432 | 2.36443 | 0.47082288 | 0.340048234 | 0.131  |
| cg26985878 | I  | 37 | 17 | 79799549                  | 0.58 | 0.00041 | 3.39184 | 0.77355207 | 0.904201816 | -0.131 |
| cg23881099 | I  | 37 | 17 | 79924020                  | 0.46 | 0.01197 | 1.92207 | 0.70726289 | 0.576516818 | 0.131  |
| cg10310700 | I  | 37 | 17 | 80872461 TBCD             | 0.58 | 0.00041 | 3.39184 | 0.57321202 | 0.441811369 | 0.131  |
| cg14758525 | II | 37 | 18 | 12041672                  | 0.46 | 0.01197 | 1.92207 | 0.52307046 | 0.653893614 | -0.131 |
| cg05165553 | I  | 37 | 18 | 77171010 NFATC1;NFATC1;NF | 0.42 | 0.02991 | 1.52413 | 0.71716919 | 0.848376057 | -0.131 |
| cg19865472 | I  | 37 | 19 | 617133 HCN2               | 0.42 | 0.02991 | 1.52413 | 0.84429876 | 0.713530931 | 0.131  |
| cg23357789 | I  | 37 | 19 | 848026 PRTN3              | 0.42 | 0.02991 | 1.52413 | 0.39253687 | 0.523361069 | -0.131 |
| cg04848343 | I  | 37 | 19 | 4544095 SEMA6B            | 0.5  | 0.00432 | 2.36443 | 0.7638417  | 0.894991393 | -0.131 |
| cg07543883 | II | 37 | 19 | 10213271 ANGPTL6;ANGPTL6  | 0.42 | 0.02991 | 1.52413 | 0.68132574 | 0.550301396 | 0.131  |
| cg14592928 | II | 37 | 20 | 897600 ANGPT4             | 0.42 | 0.02991 | 1.52413 | 0.78399561 | 0.653039296 | 0.131  |
| cg21001667 | II | 37 | 20 | 32954013 ITCH             | 0.5  | 0.00432 | 2.36443 | 0.27982762 | 0.410788005 | -0.131 |
| cg26206598 | II | 37 | 20 | 47445432 PREX1            | 0.42 | 0.02991 | 1.52413 | 0.50749218 | 0.638341447 | -0.131 |
| cg22990871 | II | 37 | 21 | 43377577                  | 0.58 | 0.00041 | 3.39184 | 0.34076092 | 0.471346172 | -0.131 |
| cg17939585 | II | 37 | 22 | 50747040 PLXNB2           | 0.5  | 0.00432 | 2.36443 | 0.35373087 | 0.4848791   | -0.131 |
| cg17109725 | II | 37 | 1  | 18707479                  | 0.54 | 0.0014  | 2.85345 | 0.5408079  | 0.410539271 | 0.13   |
| cg22125902 | II | 37 | 1  | 26002535 MAN1C1           | 0.58 | 0.00041 | 3.39184 | 0.58070862 | 0.451141565 | 0.13   |
| cg10710218 | II | 37 | 1  | 55012989 ACOT11;ACOT11    | 0.5  | 0.00432 | 2.36443 | 0.3841626  | 0.514147415 | -0.13  |
| cg21448423 | II | 37 | 1  | 55013956 ACOT11;ACOT11;A  | 0.42 | 0.02991 | 1.52413 | 0.49857239 | 0.62853427  | -0.13  |
| cg16269755 | II | 37 | 1  | 151586058 SNX27           | 0.54 | 0.0014  | 2.85345 | 0.62486213 | 0.755203026 | -0.13  |
| cg20535085 | II | 37 | 1  | 160616604 SLAMF1          | 0.5  | 0.00432 | 2.36443 | 0.66350302 | 0.533029521 | 0.13   |
| cg03421657 | II | 37 | 1  | 166039754 FAM78B          | 0.58 | 0.00041 | 3.39184 | 0.75861541 | 0.628851156 | 0.13   |
| cg12298872 | II | 37 | 1  | 228352449 C1orf69         | 0.58 | 0.00041 | 3.39184 | 0.67611589 | 0.806602898 | -0.13  |
| cg14209730 | II | 37 | 2  | 64632636                  | 0.5  | 0.00432 | 2.36443 | 0.77266857 | 0.902451484 | -0.13  |
| cg12833765 | II | 37 | 2  | 69470878 ANTXR1           | 0.5  | 0.00432 | 2.36443 | 0.76808117 | 0.638474468 | 0.13   |
| cg24803346 | II | 37 | 2  | 73201477 SFXN5            | 0.62 | 0.0001  | 3.98291 | 0.56501735 | 0.695324804 | -0.13  |

|            |    |    |   |           |                   |      |          |         |            |             |       |
|------------|----|----|---|-----------|-------------------|------|----------|---------|------------|-------------|-------|
| cg11344744 | II | 37 | 2 | 97526122  | SEMA4C            | 0.58 | 0.00041  | 3.39184 | 0.44812908 | 0.578343583 | -0.13 |
| cg25725843 | II | 37 | 2 | 107504169 | ST6GAL2;ST6GAL2   | 0.62 | 0.0001   | 3.98291 | 0.25202678 | 0.381800809 | -0.13 |
| cg14102128 | I  | 37 | 2 | 110371632 | SEPT10;SEPT10;SEP | 0.5  | 0.00432  | 2.36443 | 0.08032827 | 0.210281907 | -0.13 |
| cg02551646 | II | 37 | 2 | 216478293 |                   | 0.46 | 0.01197  | 1.92207 | 0.76194541 | 0.631955628 | 0.13  |
| cg13877916 | II | 37 | 2 | 240499800 |                   | 0.54 | 0.0014   | 2.85345 | 0.68866463 | 0.819000987 | -0.13 |
| cg11184109 | II | 37 | 3 | 53164962  | RFT1              | 0.46 | 0.01197  | 1.92207 | 0.30065713 | 0.430895167 | -0.13 |
| cg15321908 | II | 37 | 3 | 53187213  |                   | 0.58 | 0.00041  | 3.39184 | 0.61487812 | 0.74455513  | -0.13 |
| cg10464130 | II | 37 | 3 | 123991925 | KALRN;KALRN       | 0.54 | 0.0014   | 2.85345 | 0.6181441  | 0.487966292 | 0.13  |
| cg00218914 | II | 37 | 3 | 129146731 | C3orf25           | 0.54 | 0.0014   | 2.85345 | 0.28490411 | 0.415354774 | -0.13 |
| cg14875327 | I  | 37 | 3 | 197081654 |                   | 0.58 | 0.00041  | 3.39184 | 0.82091028 | 0.69091503  | 0.13  |
| cg17330176 | II | 37 | 4 | 2389058   | ZFYVE28           | 0.67 | 2.34E-05 | 4.63072 | 0.6668678  | 0.796468581 | -0.13 |
| cg05012661 | II | 37 | 4 | 6891264   |                   | 0.42 | 0.02991  | 1.52413 | 0.46425045 | 0.593978482 | -0.13 |
| cg03999941 | I  | 37 | 5 | 957511    |                   | 0.46 | 0.01197  | 1.92207 | 0.72911642 | 0.599497081 | 0.13  |
| cg07019857 | II | 37 | 5 | 106822849 | EFNA5             | 0.5  | 0.00432  | 2.36443 | 0.64763726 | 0.777989401 | -0.13 |
| cg16104139 | I  | 37 | 5 | 134829480 |                   | 0.58 | 0.00041  | 3.39184 | 0.53649105 | 0.666617919 | -0.13 |
| cg14741236 | II | 37 | 5 | 171985354 |                   | 0.46 | 0.01197  | 1.92207 | 0.73437617 | 0.60438299  | 0.13  |
| cg05871756 | II | 37 | 5 | 173216171 |                   | 0.5  | 0.00432  | 2.36443 | 0.35350634 | 0.483869459 | -0.13 |
| cg24686957 | II | 37 | 6 | 5214950   | LYRM4;LYRM4;LYRI  | 0.54 | 0.0014   | 2.85345 | 0.76554128 | 0.895130479 | -0.13 |
| cg19917989 | II | 37 | 6 | 14925093  |                   | 0.46 | 0.01197  | 1.92207 | 0.60548559 | 0.735254704 | -0.13 |
| cg05085500 | II | 37 | 6 | 19692172  |                   | 0.54 | 0.0014   | 2.85345 | 0.13518606 | 0.265556519 | -0.13 |
| cg24994319 | II | 37 | 6 | 25027586  |                   | 0.58 | 0.00041  | 3.39184 | 0.26868624 | 0.138802318 | 0.13  |
| cg02680487 | I  | 37 | 6 | 30851529  | DDR1;DDR1         | 0.58 | 0.00041  | 3.39184 | 0.40598984 | 0.275978787 | 0.13  |
| cg05631194 | II | 37 | 6 | 31146417  | PSORS1C3          | 0.46 | 0.01197  | 1.92207 | 0.80913102 | 0.67891996  | 0.13  |
| cg10552964 | II | 37 | 6 | 35991802  | SLC26A8;SLC26A8   | 0.5  | 0.00432  | 2.36443 | 0.42521362 | 0.555283843 | -0.13 |
| cg12649238 | II | 37 | 6 | 36669758  |                   | 0.67 | 2.34E-05 | 4.63072 | 0.73565875 | 0.865934288 | -0.13 |
| cg25318189 | II | 37 | 7 | 2800436   | GNA12             | 0.5  | 0.00432  | 2.36443 | 0.37466727 | 0.504299049 | -0.13 |
| cg01322214 | II | 37 | 7 | 25219198  | C7orf31           | 0.5  | 0.00432  | 2.36443 | 0.39002005 | 0.520417015 | -0.13 |
| cg18202127 | I  | 37 | 7 | 36061063  |                   | 0.46 | 0.01197  | 1.92207 | 0.76457275 | 0.634486856 | 0.13  |
| cg01973676 | I  | 37 | 7 | 101596404 | CUX1;CUX1;CUX1    | 0.54 | 0.0014   | 2.85345 | 0.15715887 | 0.287403361 | -0.13 |
| cg22103219 | II | 37 | 7 | 101934892 | SH2B2             | 0.58 | 0.00041  | 3.39184 | 0.31376267 | 0.183911112 | 0.13  |
| cg09159022 | II | 37 | 8 | 4849522   | CSMD1             | 0.58 | 0.00041  | 3.39184 | 0.17558558 | 0.30535926  | -0.13 |
| cg06076277 | II | 37 | 8 | 49783056  |                   | 0.54 | 0.0014   | 2.85345 | 0.18616982 | 0.316018639 | -0.13 |
| cg13874498 | II | 37 | 9 | 132247010 |                   | 0.42 | 0.02991  | 1.52413 | 0.81476652 | 0.685020169 | 0.13  |

|            |    |    |    |           |                   |      |          |         |            |             |       |
|------------|----|----|----|-----------|-------------------|------|----------|---------|------------|-------------|-------|
| cg18886109 | II | 37 | 10 | 72514348  | ADAMTS14;ADAMT    | 0.58 | 0.00041  | 3.39184 | 0.40063053 | 0.530480998 | -0.13 |
| cg16933922 | II | 37 | 10 | 126106614 | OAT               | 0.54 | 0.0014   | 2.85345 | 0.16577372 | 0.296132071 | -0.13 |
| cg07244202 | II | 37 | 10 | 127750970 | ADAM12;ADAM12     | 0.58 | 0.00041  | 3.39184 | 0.61915388 | 0.489408742 | 0.13  |
| cg01512840 | I  | 37 | 10 | 134258819 | C10orf91          | 0.46 | 0.01197  | 1.92207 | 0.17821899 | 0.308544496 | -0.13 |
| cg10042645 | II | 37 | 11 | 2308589   |                   | 0.54 | 0.0014   | 2.85345 | 0.72441001 | 0.854074963 | -0.13 |
| cg16075139 | I  | 37 | 11 | 2406923   | CD81              | 0.58 | 0.00041  | 3.39184 | 0.55295566 | 0.422765032 | 0.13  |
| cg16587707 | II | 37 | 11 | 2920265   | SLC22A18AS;SLC22. | 0.75 | 7.61E-07 | 6.11857 | 0.54234678 | 0.672263543 | -0.13 |
| cg23272978 | I  | 37 | 11 | 65315030  | LTBP3;LTBP3;LTBP3 | 0.67 | 2.34E-05 | 4.63072 | 0.84232861 | 0.712441251 | 0.13  |
| cg14562054 | II | 37 | 11 | 66104485  | RIN1              | 0.46 | 0.01197  | 1.92207 | 0.62804529 | 0.497980246 | 0.13  |
| cg23756264 | II | 37 | 11 | 68605511  | CPT1A;CPT1A       | 0.5  | 0.00432  | 2.36443 | 0.2287711  | 0.358299951 | -0.13 |
| cg07322003 | II | 37 | 11 | 76384620  |                   | 0.46 | 0.01197  | 1.92207 | 0.7524885  | 0.622424309 | 0.13  |
| cg15376097 | II | 37 | 11 | 118135270 | MPZL2;MPZL2       | 0.46 | 0.01197  | 1.92207 | 0.3239598  | 0.453996784 | -0.13 |
| cg11606444 | I  | 37 | 11 | 121353563 | SORL1             | 0.62 | 0.0001   | 3.98291 | 0.53172946 | 0.401424346 | 0.13  |
| cg13422817 | II | 37 | 12 | 4550927   | FGF6              | 0.46 | 0.01197  | 1.92207 | 0.49992908 | 0.370332973 | 0.13  |
| cg05405094 | II | 37 | 12 | 20141722  |                   | 0.54 | 0.0014   | 2.85345 | 0.68924216 | 0.559342    | 0.13  |
| cg09001549 | I  | 37 | 12 | 129281454 | SLC15A4           | 0.46 | 0.01197  | 1.92207 | 0.85272124 | 0.722225619 | 0.13  |
| cg26885400 | II | 37 | 13 | 27842278  |                   | 0.5  | 0.00432  | 2.36443 | 0.41631823 | 0.546605541 | -0.13 |
| cg09624466 | II | 37 | 14 | 57278710  | OTX2OS1           | 0.58 | 0.00041  | 3.39184 | 0.14465031 | 0.274208921 | -0.13 |
| cg23305899 | I  | 37 | 14 | 101539489 |                   | 0.58 | 0.00041  | 3.39184 | 0.83808033 | 0.708190092 | 0.13  |
| cg02513364 | II | 37 | 14 | 103373997 |                   | 0.54 | 0.0014   | 2.85345 | 0.67621035 | 0.546205141 | 0.13  |
| cg04715649 | II | 37 | 14 | 103416122 | CDC42BPB          | 0.58 | 0.00041  | 3.39184 | 0.75169139 | 0.621800984 | 0.13  |
| cg08334034 | II | 37 | 15 | 93615039  | RGMA;RGMA;RGM.    | 0.46 | 0.01197  | 1.92207 | 0.59130284 | 0.720814495 | -0.13 |
| cg04330371 | I  | 37 | 15 | 96875656  | NR2F2;NR2F2;NR2F  | 0.46 | 0.01197  | 1.92207 | 0.17791594 | 0.308289843 | -0.13 |
| cg00003900 | II | 37 | 16 | 2897074   |                   | 0.42 | 0.02991  | 1.52413 | 0.55046236 | 0.420260986 | 0.13  |
| cg07906046 | II | 37 | 16 | 4131584   | ADCY9             | 0.46 | 0.01197  | 1.92207 | 0.5425705  | 0.412376049 | 0.13  |
| cg02106534 | II | 37 | 16 | 4561545   | C16orf5           | 0.5  | 0.00432  | 2.36443 | 0.36829664 | 0.498080674 | -0.13 |
| cg26706803 | II | 37 | 16 | 50293530  |                   | 0.42 | 0.02991  | 1.52413 | 0.19069415 | 0.320271536 | -0.13 |
| cg16771652 | II | 37 | 16 | 50730385  | NOD2              | 0.62 | 0.0001   | 3.98291 | 0.33809913 | 0.467646969 | -0.13 |
| cg06178179 | II | 37 | 16 | 66881892  | CA7;CA7           | 0.46 | 0.01197  | 1.92207 | 0.68848852 | 0.81861743  | -0.13 |
| cg18520696 | II | 37 | 17 | 4631822   |                   | 0.54 | 0.0014   | 2.85345 | 0.8620497  | 0.732479464 | 0.13  |
| cg23545250 | II | 37 | 17 | 6348091   | FAM64A            | 0.67 | 2.34E-05 | 4.63072 | 0.29017693 | 0.42044118  | -0.13 |
| cg25322720 | II | 37 | 17 | 19628292  |                   | 0.58 | 0.00041  | 3.39184 | 0.25958715 | 0.389485004 | -0.13 |
| cg02650512 | II | 37 | 17 | 27048975  | RPL23A;SNORD4A;S  | 0.46 | 0.01197  | 1.92207 | 0.74507088 | 0.614988781 | 0.13  |

|            |    |    |    |           |                 |      |          |         |            |             |        |
|------------|----|----|----|-----------|-----------------|------|----------|---------|------------|-------------|--------|
| cg22589778 | II | 37 | 17 | 46059110  | CDK5RAP3        | 0.5  | 0.00432  | 2.36443 | 0.2830991  | 0.412982811 | -0.13  |
| cg10165801 | I  | 37 | 17 | 46651186  | HOXB3           | 0.42 | 0.02991  | 1.52413 | 0.3285924  | 0.458916294 | -0.13  |
| cg05941027 | II | 37 | 17 | 61774174  | LIMD2           | 0.5  | 0.00432  | 2.36443 | 0.26688387 | 0.136394697 | 0.13   |
| cg16375358 | II | 37 | 17 | 64873337  | CACNG5;CACNG5   | 0.54 | 0.0014   | 2.85345 | 0.74063674 | 0.610898147 | 0.13   |
| cg00900735 | I  | 37 | 17 | 73316505  | GRB2;GRB2       | 0.42 | 0.02991  | 1.52413 | 0.85826278 | 0.728591439 | 0.13   |
| cg23019125 | II | 37 | 17 | 78820391  | RPTOR;RPTOR     | 0.46 | 0.01197  | 1.92207 | 0.5203465  | 0.390178919 | 0.13   |
| cg11220060 | II | 37 | 19 | 12997418  | KLF1            | 0.54 | 0.0014   | 2.85345 | 0.45452642 | 0.584204301 | -0.13  |
| cg01542019 | I  | 37 | 19 | 14673053  | TECR            | 0.42 | 0.02991  | 1.52413 | 0.47079539 | 0.341288369 | 0.13   |
| cg10614223 | II | 37 | 19 | 18111389  | ARRDC2          | 0.62 | 0.0001   | 3.98291 | 0.51603576 | 0.385979574 | 0.13   |
| cg01743841 | I  | 37 | 20 | 61992494  | CHRNA4          | 0.42 | 0.02991  | 1.52413 | 0.04407186 | 0.173860999 | -0.13  |
| cg15557168 | I  | 37 | 22 | 42548783  |                 | 0.62 | 0.0001   | 3.98291 | 0.75164503 | 0.881501839 | -0.13  |
| cg00007800 | II | 37 | 1  | 1838518   |                 | 0.42 | 0.02991  | 1.52413 | 0.6681408  | 0.539247322 | 0.129  |
| cg26332488 | I  | 37 | 1  | 2230640   | SKI             | 0.42 | 0.02991  | 1.52413 | 0.81599153 | 0.945184804 | -0.129 |
| cg09185998 | II | 37 | 1  | 2428936   | PLCH2           | 0.5  | 0.00432  | 2.36443 | 0.63772388 | 0.508791543 | 0.129  |
| cg03515844 | II | 37 | 1  | 16277545  | ZBTB17          | 0.46 | 0.01197  | 1.92207 | 0.55469026 | 0.425268274 | 0.129  |
| cg07965774 | II | 37 | 1  | 17746286  | RCC2;RCC2       | 0.42 | 0.02991  | 1.52413 | 0.58763481 | 0.716891718 | -0.129 |
| cg17086398 | II | 37 | 1  | 31896392  | SERINC2         | 0.5  | 0.00432  | 2.36443 | 0.22775017 | 0.098737054 | 0.129  |
| cg12072789 | II | 37 | 1  | 110735112 | SLC6A17         | 0.54 | 0.0014   | 2.85345 | 0.70919269 | 0.58001177  | 0.129  |
| cg03514239 | II | 37 | 1  | 153329781 | S100A9          | 0.5  | 0.00432  | 2.36443 | 0.27959307 | 0.408148643 | -0.129 |
| cg21196487 | II | 37 | 1  | 153538964 | S100A2          | 0.54 | 0.0014   | 2.85345 | 0.22167678 | 0.3511326   | -0.129 |
| cg01352906 | II | 37 | 1  | 206679195 |                 | 0.46 | 0.01197  | 1.92207 | 0.452373   | 0.323822434 | 0.129  |
| cg04341343 | II | 37 | 2  | 8784813   |                 | 0.54 | 0.0014   | 2.85345 | 0.25969867 | 0.388454795 | -0.129 |
| cg00055073 | II | 37 | 2  | 43398118  |                 | 0.46 | 0.01197  | 1.92207 | 0.23971758 | 0.368824586 | -0.129 |
| cg16619576 | II | 37 | 2  | 45398036  |                 | 0.58 | 0.00041  | 3.39184 | 0.57854662 | 0.707249499 | -0.129 |
| cg03549739 | II | 37 | 2  | 86163631  |                 | 0.62 | 0.0001   | 3.98291 | 0.72079619 | 0.850025779 | -0.129 |
| cg13389146 | II | 37 | 2  | 96808802  |                 | 0.58 | 0.00041  | 3.39184 | 0.75296575 | 0.624143074 | 0.129  |
| cg00858840 | II | 37 | 2  | 171573839 | SP5             | 0.58 | 0.00041  | 3.39184 | 0.11310501 | 0.242429488 | -0.129 |
| cg25124402 | II | 37 | 2  | 219125749 | GPBAR1;GPBAR1;G | 0.5  | 0.00432  | 2.36443 | 0.3240628  | 0.453539667 | -0.129 |
| cg02464551 | II | 37 | 2  | 232482571 |                 | 0.75 | 7.61E-07 | 6.11857 | 0.44975189 | 0.578642944 | -0.129 |
| cg21672829 | II | 37 | 2  | 236619825 | AGAP1;AGAP1     | 0.67 | 2.34E-05 | 4.63072 | 0.83145763 | 0.702480391 | 0.129  |
| cg15058210 | II | 37 | 2  | 240196877 | HDAC4           | 0.46 | 0.01197  | 1.92207 | 0.36619785 | 0.495168018 | -0.129 |
| cg26266876 | II | 37 | 3  | 23957486  | RPL15;NKIRAS1   | 0.46 | 0.01197  | 1.92207 | 0.24054256 | 0.369471613 | -0.129 |
| cg26057969 | II | 37 | 3  | 127310291 | TPRA1;TPRA1     | 0.46 | 0.01197  | 1.92207 | 0.14318886 | 0.271842098 | -0.129 |

|            |    |    |    |                          |      |          |         |            |             |        |
|------------|----|----|----|--------------------------|------|----------|---------|------------|-------------|--------|
| cg07356486 | II | 37 | 3  | 133646095                | 0.67 | 2.34E-05 | 4.63072 | 0.24616931 | 0.374824964 | -0.129 |
| cg20534585 | I  | 37 | 3  | 196373598 LRRC33         | 0.46 | 0.01197  | 1.92207 | 0.61230867 | 0.741328713 | -0.129 |
| cg01132407 | II | 37 | 4  | 645781 PDE6B;PDE6B;PDE6C | 0.42 | 0.02991  | 1.52413 | 0.6655342  | 0.79476283  | -0.129 |
| cg16417416 | II | 37 | 4  | 6284031 WFS1;WFS1        | 0.5  | 0.00432  | 2.36443 | 0.64913397 | 0.777899324 | -0.129 |
| cg14342707 | II | 37 | 6  | 168053444                | 0.5  | 0.00432  | 2.36443 | 0.33901873 | 0.468142623 | -0.129 |
| cg07136111 | II | 37 | 7  | 30829005 FAM188B         | 0.42 | 0.02991  | 1.52413 | 0.63101307 | 0.760380291 | -0.129 |
| cg16459265 | II | 37 | 7  | 45025080 C7orf40;SNORA9  | 0.5  | 0.00432  | 2.36443 | 0.71567656 | 0.587147343 | 0.129  |
| cg00122406 | II | 37 | 8  | 26431736                 | 0.58 | 0.00041  | 3.39184 | 0.20122457 | 0.329833334 | -0.129 |
| cg25900943 | II | 37 | 8  | 103820614                | 0.5  | 0.00432  | 2.36443 | 0.6009829  | 0.730149109 | -0.129 |
| cg22459081 | II | 37 | 8  | 142095187                | 0.54 | 0.0014   | 2.85345 | 0.72978719 | 0.858743742 | -0.129 |
| cg01975786 | II | 37 | 8  | 142428968                | 0.42 | 0.02991  | 1.52413 | 0.62622888 | 0.496900603 | 0.129  |
| cg27033805 | I  | 37 | 8  | 145499436 BOP1           | 0.54 | 0.0014   | 2.85345 | 0.54361886 | 0.672788389 | -0.129 |
| cg14505439 | II | 37 | 9  | 134605210 RAPGEF1        | 0.58 | 0.00041  | 3.39184 | 0.63825949 | 0.509285303 | 0.129  |
| cg22992966 | II | 37 | 10 | 43867024 FXVD4           | 0.62 | 0.0001   | 3.98291 | 0.63343537 | 0.76233898  | -0.129 |
| cg16352527 | I  | 37 | 10 | 72476178 ADAMTS14;ADAMT  | 0.42 | 0.02991  | 1.52413 | 0.53134539 | 0.660792113 | -0.129 |
| cg14308082 | II | 37 | 10 | 131568021                | 0.62 | 0.0001   | 3.98291 | 0.6065771  | 0.735202309 | -0.129 |
| cg12822816 | I  | 37 | 10 | 134361019 INPP5A         | 0.46 | 0.01197  | 1.92207 | 0.69769154 | 0.568713134 | 0.129  |
| cg16802508 | II | 37 | 11 | 67070738 SSH3            | 0.5  | 0.00432  | 2.36443 | 0.33240658 | 0.460952798 | -0.129 |
| cg25256924 | I  | 37 | 11 | 67205739 CORO1B;CORO1B;P | 0.46 | 0.01197  | 1.92207 | 0.65186175 | 0.522970423 | 0.129  |
| cg08037478 | I  | 37 | 12 | 38545085                 | 0.58 | 0.00041  | 3.39184 | 0.81791293 | 0.689200385 | 0.129  |
| cg04472592 | II | 37 | 12 | 52585786 KRT80;KRT80     | 0.54 | 0.0014   | 2.85345 | 0.62418743 | 0.495499787 | 0.129  |
| cg14507533 | II | 37 | 13 | 114066074                | 0.58 | 0.00041  | 3.39184 | 0.68137569 | 0.810855622 | -0.129 |
| cg07734106 | II | 37 | 14 | 96117415 TCL6            | 0.54 | 0.0014   | 2.85345 | 0.687585   | 0.558617476 | 0.129  |
| cg01545493 | II | 37 | 14 | 103659071                | 0.54 | 0.0014   | 2.85345 | 0.64200187 | 0.77146654  | -0.129 |
| cg02072589 | II | 37 | 14 | 104917314                | 0.5  | 0.00432  | 2.36443 | 0.54887472 | 0.677870823 | -0.129 |
| cg04792777 | II | 37 | 14 | 106322429                | 0.54 | 0.0014   | 2.85345 | 0.5816924  | 0.452393449 | 0.129  |
| cg27157619 | II | 37 | 15 | 74714463 SEMA7A;SEMA7A;S | 0.46 | 0.01197  | 1.92207 | 0.82876697 | 0.699315232 | 0.129  |
| cg17500686 | II | 37 | 15 | 79621783                 | 0.54 | 0.0014   | 2.85345 | 0.74287597 | 0.871765923 | -0.129 |
| cg02498072 | II | 37 | 16 | 12088037 RUNDCA          | 0.5  | 0.00432  | 2.36443 | 0.72839649 | 0.599775467 | 0.129  |
| cg06352352 | II | 37 | 16 | 67181466 C16orf70        | 0.5  | 0.00432  | 2.36443 | 0.74471805 | 0.87339728  | -0.129 |
| cg07719604 | II | 37 | 16 | 67232460 ELMO3;E2F4      | 0.54 | 0.0014   | 2.85345 | 0.56357427 | 0.692133134 | -0.129 |
| cg06201861 | II | 37 | 16 | 84877964 CRISPLD2        | 0.54 | 0.0014   | 2.85345 | 0.67855482 | 0.807973659 | -0.129 |
| cg06763375 | II | 37 | 16 | 89025547 CBFA2T3         | 0.67 | 2.34E-05 | 4.63072 | 0.46302713 | 0.591789468 | -0.129 |

|            |    |    |    |                           |      |          |         |            |             |        |
|------------|----|----|----|---------------------------|------|----------|---------|------------|-------------|--------|
| cg06772580 | II | 37 | 17 | 27899576 TP53I13          | 0.54 | 0.0014   | 2.85345 | 0.47164103 | 0.600972461 | -0.129 |
| cg10035737 | II | 37 | 17 | 42840005 ADAM11           | 0.5  | 0.00432  | 2.36443 | 0.47339097 | 0.602535046 | -0.129 |
| cg16781907 | II | 37 | 17 | 48273001 COL1A1           | 0.42 | 0.02991  | 1.52413 | 0.70442885 | 0.575910954 | 0.129  |
| cg23679492 | II | 37 | 17 | 55828084                  | 0.62 | 0.0001   | 3.98291 | 0.58341015 | 0.712569056 | -0.129 |
| cg22091236 | II | 37 | 17 | 78853966 RPTOR;RPTOR      | 0.46 | 0.01197  | 1.92207 | 0.60672254 | 0.736199867 | -0.129 |
| cg26729913 | II | 37 | 17 | 79135071 AATK             | 0.67 | 2.34E-05 | 4.63072 | 0.36306164 | 0.491883161 | -0.129 |
| cg26551026 | II | 37 | 18 | 20717693 CABLES1;CABLES1  | 0.58 | 0.00041  | 3.39184 | 0.64332173 | 0.772445652 | -0.129 |
| cg10752406 | I  | 37 | 19 | 827776 AZU1               | 0.42 | 0.02991  | 1.52413 | 0.40644744 | 0.534998872 | -0.129 |
| cg14779825 | II | 37 | 19 | 43099845 CEACAM8          | 0.46 | 0.01197  | 1.92207 | 0.40037305 | 0.529655357 | -0.129 |
| cg12986110 | II | 37 | 19 | 48551504 PLA2G4C;PLA2G4C; | 0.54 | 0.0014   | 2.85345 | 0.78785469 | 0.658730019 | 0.129  |
| cg01450566 | II | 37 | 20 | 9484340                   | 0.67 | 2.34E-05 | 4.63072 | 0.46489294 | 0.593641214 | -0.129 |
| cg07727594 | II | 37 | 20 | 45187423 SLC13A3;SLC13A3  | 0.5  | 0.00432  | 2.36443 | 0.50454549 | 0.633617529 | -0.129 |
| cg16785077 | II | 37 | 21 | 42791867 MX1              | 0.54 | 0.0014   | 2.85345 | 0.67763068 | 0.806293366 | -0.129 |
| cg23512275 | II | 37 | 21 | 45232595 LOC284837        | 0.5  | 0.00432  | 2.36443 | 0.35833516 | 0.486926491 | -0.129 |
| cg06230805 | I  | 37 | 21 | 45391366 AGPAT3;AGPAT3    | 0.58 | 0.00041  | 3.39184 | 0.77012574 | 0.899139361 | -0.129 |
| cg03296761 | II | 37 | 22 | 30822510 MTP18;MTP18      | 0.5  | 0.00432  | 2.36443 | 0.64451534 | 0.515775145 | 0.129  |
| cg02079700 | II | 37 | 22 | 43166347                  | 0.46 | 0.01197  | 1.92207 | 0.74840612 | 0.61957112  | 0.129  |
| cg13863076 | II | 37 | 22 | 44392508                  | 0.54 | 0.0014   | 2.85345 | 0.67799693 | 0.548708195 | 0.129  |
| cg14942952 | II | 37 | 22 | 44576268 PARVG;PARVG;PAR  | 0.46 | 0.01197  | 1.92207 | 0.50092796 | 0.630242249 | -0.129 |
| cg09556700 | I  | 37 | 1  | 2230668 SKI               | 0.42 | 0.02991  | 1.52413 | 0.71247194 | 0.840097812 | -0.128 |
| cg06099439 | II | 37 | 1  | 3146905 PRDM16;PRDM16     | 0.46 | 0.01197  | 1.92207 | 0.66269791 | 0.534956535 | 0.128  |
| cg24371425 | I  | 37 | 1  | 11561497 PTCHD2           | 0.42 | 0.02991  | 1.52413 | 0.46903826 | 0.596818908 | -0.128 |
| cg02086195 | I  | 37 | 1  | 12656232 DHRS3            | 0.46 | 0.01197  | 1.92207 | 0.52672008 | 0.655205247 | -0.128 |
| cg11136886 | II | 37 | 1  | 33609509                  | 0.5  | 0.00432  | 2.36443 | 0.74857166 | 0.876515906 | -0.128 |
| cg02289754 | II | 37 | 1  | 47068636 MKNK1;MKNK1;MK   | 0.5  | 0.00432  | 2.36443 | 0.74529943 | 0.873150494 | -0.128 |
| cg16527877 | II | 37 | 1  | 92036018                  | 0.58 | 0.00041  | 3.39184 | 0.5637599  | 0.691473878 | -0.128 |
| cg19808620 | I  | 37 | 1  | 153514442 S100A5          | 0.58 | 0.00041  | 3.39184 | 0.2159883  | 0.344033052 | -0.128 |
| cg22441770 | II | 37 | 1  | 153929592 CRTC2           | 0.46 | 0.01197  | 1.92207 | 0.60983519 | 0.482296778 | 0.128  |
| cg09988805 | II | 37 | 2  | 43278552                  | 0.46 | 0.01197  | 1.92207 | 0.69666077 | 0.568462229 | 0.128  |
| cg18146074 | II | 37 | 2  | 232242955                 | 0.46 | 0.01197  | 1.92207 | 0.34050733 | 0.468855848 | -0.128 |
| cg15868235 | I  | 37 | 3  | 12486114                  | 0.54 | 0.0014   | 2.85345 | 0.77235186 | 0.644668427 | 0.128  |
| cg13296238 | II | 37 | 3  | 127323965 MCM2            | 0.42 | 0.02991  | 1.52413 | 0.56714619 | 0.69515552  | -0.128 |
| cg14637144 | I  | 37 | 3  | 196750506 MFI2;MFI2       | 0.46 | 0.01197  | 1.92207 | 0.34236644 | 0.214774551 | 0.128  |

|            |    |    |    |           |                   |      |          |         |            |             |        |
|------------|----|----|----|-----------|-------------------|------|----------|---------|------------|-------------|--------|
| cg13941682 | II | 37 | 4  | 702545    | PCGF3             | 0.54 | 0.0014   | 2.85345 | 0.73490413 | 0.8629894   | -0.128 |
| cg14724492 | II | 37 | 4  | 1015211   | FGFRL1;FGFRL1;FGI | 0.54 | 0.0014   | 2.85345 | 0.54180527 | 0.413623124 | 0.128  |
| cg10742523 | II | 37 | 4  | 55650393  |                   | 0.54 | 0.0014   | 2.85345 | 0.60999956 | 0.738495956 | -0.128 |
| cg02215171 | II | 37 | 4  | 89379156  | HERC5             | 0.42 | 0.02991  | 1.52413 | 0.37013932 | 0.49773613  | -0.128 |
| cg09682727 | II | 37 | 5  | 139953966 |                   | 0.42 | 0.02991  | 1.52413 | 0.54242854 | 0.670264751 | -0.128 |
| cg05016408 | I  | 37 | 5  | 150326174 | LOC134466         | 0.46 | 0.01197  | 1.92207 | 0.2474895  | 0.375219541 | -0.128 |
| cg07347294 | II | 37 | 5  | 176080248 | TSPAN17;TSPAN17;  | 0.46 | 0.01197  | 1.92207 | 0.70872641 | 0.580535294 | 0.128  |
| cg23672659 | II | 37 | 6  | 30648020  | KIAA1949;KIAA1949 | 0.54 | 0.0014   | 2.85345 | 0.59504009 | 0.466701265 | 0.128  |
| cg06422467 | II | 37 | 6  | 30720484  |                   | 0.46 | 0.01197  | 1.92207 | 0.22939969 | 0.357198225 | -0.128 |
| cg16537676 | I  | 37 | 6  | 30851624  | DDR1;DDR1         | 0.62 | 0.0001   | 3.98291 | 0.40092311 | 0.272611301 | 0.128  |
| cg20132791 | II | 37 | 6  | 35992595  | SLC26A8;SLC26A8   | 0.62 | 0.0001   | 3.98291 | 0.6223813  | 0.750603349 | -0.128 |
| cg04326499 | II | 37 | 6  | 45627080  |                   | 0.54 | 0.0014   | 2.85345 | 0.79528563 | 0.666961559 | 0.128  |
| cg06516476 | II | 37 | 6  | 86174584  | NT5E              | 0.5  | 0.00432  | 2.36443 | 0.67015977 | 0.797826327 | -0.128 |
| cg08900363 | II | 37 | 7  | 637454    | PRKAR1B;PRKAR1B   | 0.46 | 0.01197  | 1.92207 | 0.81450157 | 0.686839579 | 0.128  |
| cg04095257 | II | 37 | 7  | 1062669   | C7orf50;MIR339;C7 | 0.46 | 0.01197  | 1.92207 | 0.64064563 | 0.512754243 | 0.128  |
| cg03590328 | I  | 37 | 7  | 2684462   | TTYH3             | 0.67 | 2.34E-05 | 4.63072 | 0.50295289 | 0.630523332 | -0.128 |
| cg14882265 | II | 37 | 7  | 27184375  | HOXA5             | 0.5  | 0.00432  | 2.36443 | 0.59997971 | 0.727562003 | -0.128 |
| cg19706515 | II | 37 | 7  | 31376488  |                   | 0.5  | 0.00432  | 2.36443 | 0.20280754 | 0.330462215 | -0.128 |
| cg13912964 | II | 37 | 7  | 100867281 | ZNHIT1            | 0.58 | 0.00041  | 3.39184 | 0.77730355 | 0.905224574 | -0.128 |
| cg27269962 | II | 37 | 7  | 127540997 | SND1              | 0.5  | 0.00432  | 2.36443 | 0.6389449  | 0.767389881 | -0.128 |
| cg27494647 | I  | 37 | 7  | 150038898 | RARRES2           | 0.5  | 0.00432  | 2.36443 | 0.33363508 | 0.461766177 | -0.128 |
| cg20902975 | II | 37 | 8  | 11138403  |                   | 0.5  | 0.00432  | 2.36443 | 0.6791358  | 0.551228938 | 0.128  |
| cg16103712 | II | 37 | 8  | 99023869  | MATN2;MATN2       | 0.54 | 0.0014   | 2.85345 | 0.21894285 | 0.346968569 | -0.128 |
| cg10172675 | II | 37 | 8  | 104132683 |                   | 0.54 | 0.0014   | 2.85345 | 0.33501452 | 0.463175638 | -0.128 |
| cg27270962 | II | 37 | 8  | 134498381 | ST3GAL1;ST3GAL1   | 0.42 | 0.02991  | 1.52413 | 0.53511373 | 0.663574827 | -0.128 |
| cg03753385 | I  | 37 | 8  | 145579317 | FBXL6;C8ORFK29;FI | 0.54 | 0.0014   | 2.85345 | 0.19163881 | 0.319513323 | -0.128 |
| cg26795312 | II | 37 | 8  | 146231199 | C8orf77           | 0.54 | 0.0014   | 2.85345 | 0.76200211 | 0.633910328 | 0.128  |
| cg16832407 | II | 37 | 9  | 73736539  | TRPM3             | 0.62 | 0.0001   | 3.98291 | 0.24812531 | 0.375720501 | -0.128 |
| cg24044501 | II | 37 | 10 | 72056549  |                   | 0.5  | 0.00432  | 2.36443 | 0.19721317 | 0.325219368 | -0.128 |
| cg02138953 | II | 37 | 10 | 75666279  |                   | 0.62 | 0.0001   | 3.98291 | 0.73226337 | 0.86007014  | -0.128 |
| cg03339956 | II | 37 | 10 | 114818235 | TCF7L2;TCF7L2;TCF | 0.46 | 0.01197  | 1.92207 | 0.54603394 | 0.417639555 | 0.128  |
| cg10902549 | II | 37 | 10 | 135202522 | PAOX;PAOX;PAOX    | 0.42 | 0.02991  | 1.52413 | 0.27979331 | 0.152144487 | 0.128  |
| cg18313182 | II | 37 | 11 | 818903    | PNPLA2;PNPLA2     | 0.54 | 0.0014   | 2.85345 | 0.53580603 | 0.663964649 | -0.128 |

|            |    |    |    |                                 |      |          |         |            |             |        |
|------------|----|----|----|---------------------------------|------|----------|---------|------------|-------------|--------|
| cg09631059 | II | 37 | 11 | 856942 TSPAN4;TSPAN4;TS         | 0.54 | 0.0014   | 2.85345 | 0.80760966 | 0.679176396 | 0.128  |
| cg11368628 | II | 37 | 11 | 1856183 SYT8                    | 0.58 | 0.00041  | 3.39184 | 0.41025139 | 0.537953225 | -0.128 |
| cg11691844 | II | 37 | 11 | 85460604 SYTL2;SYTL2;SYTL2      | 0.5  | 0.00432  | 2.36443 | 0.62029675 | 0.748309115 | -0.128 |
| cg05824594 | II | 37 | 12 | 2734503 CACNA1C;CACNA1C         | 0.54 | 0.0014   | 2.85345 | 0.31463919 | 0.442455321 | -0.128 |
| cg18460107 | II | 37 | 12 | 7902153 CLEC4C;CLEC4C           | 0.46 | 0.01197  | 1.92207 | 0.37091837 | 0.242556736 | 0.128  |
| cg19743522 | I  | 37 | 12 | 113495566 DTX1                  | 0.46 | 0.01197  | 1.92207 | 0.76212326 | 0.63434376  | 0.128  |
| cg21726551 | I  | 37 | 12 | 131590460 GPR133                | 0.46 | 0.01197  | 1.92207 | 0.63422346 | 0.506280747 | 0.128  |
| cg09208010 | II | 37 | 14 | 23305780 MMP14                  | 0.46 | 0.01197  | 1.92207 | 0.19032427 | 0.318047887 | -0.128 |
| cg14974772 | II | 37 | 14 | 92414425 FBLN5                  | 0.42 | 0.02991  | 1.52413 | 0.36844466 | 0.496461429 | -0.128 |
| cg18416503 | II | 37 | 14 | 93475974 ITPK1;ITPK1;ITPK1      | 0.46 | 0.01197  | 1.92207 | 0.74205082 | 0.870156011 | -0.128 |
| cg11987068 | II | 37 | 15 | 77900788                        | 0.46 | 0.01197  | 1.92207 | 0.78398642 | 0.656231393 | 0.128  |
| cg08937107 | II | 37 | 16 | 3136857                         | 0.5  | 0.00432  | 2.36443 | 0.34453138 | 0.472454852 | -0.128 |
| cg10359235 | II | 37 | 16 | 12135470 RUNDC2A                | 0.62 | 0.0001   | 3.98291 | 0.74711161 | 0.874931384 | -0.128 |
| cg07866632 | II | 37 | 16 | 28584802 CCDC101                | 0.46 | 0.01197  | 1.92207 | 0.27844472 | 0.406651744 | -0.128 |
| cg10341242 | II | 37 | 16 | 50347849 ADCY7                  | 0.5  | 0.00432  | 2.36443 | 0.33580853 | 0.463576548 | -0.128 |
| cg09400037 | I  | 37 | 16 | 84822801                        | 0.62 | 0.0001   | 3.98291 | 0.7565665  | 0.884860224 | -0.128 |
| cg03040848 | I  | 37 | 16 | 88993053 CBFA2T3;CBFA2T3        | 0.5  | 0.00432  | 2.36443 | 0.65996399 | 0.531685946 | 0.128  |
| cg26756782 | I  | 37 | 16 | 89922218 SPIRE2                 | 0.42 | 0.02991  | 1.52413 | 0.61921208 | 0.747343391 | -0.128 |
| cg02656560 | II | 37 | 17 | 19967600                        | 0.46 | 0.01197  | 1.92207 | 0.30198756 | 0.430090953 | -0.128 |
| cg23527902 | II | 37 | 17 | 61515708 CYB561;CYB561;CYB561   | 0.58 | 0.00041  | 3.39184 | 0.28876901 | 0.416855238 | -0.128 |
| cg07739927 | II | 37 | 17 | 62778162 LOC146880;LOC146880    | 0.71 | 4.57E-06 | 5.34042 | 0.46654996 | 0.594272725 | -0.128 |
| cg20094462 | I  | 37 | 19 | 848071 PRTN3                    | 0.62 | 0.0001   | 3.98291 | 0.49216255 | 0.619902302 | -0.128 |
| cg20974196 | II | 37 | 19 | 859983 CFD                      | 0.5  | 0.00432  | 2.36443 | 0.27781416 | 0.406188357 | -0.128 |
| cg08149682 | II | 37 | 19 | 1355918 MUM1;MUM1               | 0.62 | 0.0001   | 3.98291 | 0.20096667 | 0.328618364 | -0.128 |
| cg19577671 | I  | 37 | 19 | 42782524                        | 0.58 | 0.00041  | 3.39184 | 0.60378452 | 0.731527699 | -0.128 |
| cg11911305 | II | 37 | 19 | 45428924 APOC1P1;APOC1P1        | 0.58 | 0.00041  | 3.39184 | 0.33710346 | 0.464700178 | -0.128 |
| cg05492306 | II | 37 | 19 | 45927594 ERCC1;ERCC1;ERCC1      | 0.46 | 0.01197  | 1.92207 | 0.19064268 | 0.318475595 | -0.128 |
| cg11847636 | II | 37 | 19 | 50015523 FCGRT;FCGRT            | 0.67 | 2.34E-05 | 4.63072 | 0.46116871 | 0.588999147 | -0.128 |
| cg11446693 | II | 37 | 19 | 59074994 MZF1;MZF1;LOC101928200 | 0.46 | 0.01197  | 1.92207 | 0.42052539 | 0.29278531  | 0.128  |
| cg00170438 | II | 37 | 20 | 60792389 HRH3                   | 0.46 | 0.01197  | 1.92207 | 0.38675956 | 0.258998583 | 0.128  |
| cg22871485 | I  | 37 | 22 | 22901830 PRAME;LOC648691        | 0.42 | 0.02991  | 1.52413 | 0.33147232 | 0.2031496   | 0.128  |
| cg01843272 | II | 37 | 22 | 50911936 SBF1                   | 0.67 | 2.34E-05 | 4.63072 | 0.56157074 | 0.433892702 | 0.128  |
| cg07147033 | II | 37 | 1  | 1549615 MIB2;MIB2;MIB2;N        | 0.46 | 0.01197  | 1.92207 | 0.57700463 | 0.703929202 | -0.127 |

|            |    |    |   |           |                  |      |          |         |            |             |        |
|------------|----|----|---|-----------|------------------|------|----------|---------|------------|-------------|--------|
| cg16355231 | I  | 37 | 1 | 2344979   | PEX10;PEX10      | 0.5  | 0.00432  | 2.36443 | 0.37472841 | 0.247472969 | 0.127  |
| cg03082523 | II | 37 | 1 | 3155965   | PRDM16;PRDM16    | 0.54 | 0.0014   | 2.85345 | 0.6101447  | 0.483119213 | 0.127  |
| cg12764201 | II | 37 | 1 | 10510123  | CORT;APITD1;CORT | 0.58 | 0.00041  | 3.39184 | 0.71295036 | 0.840142014 | -0.127 |
| cg01905489 | II | 37 | 1 | 26616534  | UBXN11;UBXN11;U  | 0.58 | 0.00041  | 3.39184 | 0.32089626 | 0.194338544 | 0.127  |
| cg15891991 | II | 37 | 1 | 117396695 |                  | 0.58 | 0.00041  | 3.39184 | 0.18880769 | 0.315375    | -0.127 |
| cg12796135 | II | 37 | 1 | 153916764 | DENND4B          | 0.46 | 0.01197  | 1.92207 | 0.57482926 | 0.702048294 | -0.127 |
| cg23166773 | II | 37 | 1 | 243659016 | SDCCAG8;AKT3     | 0.46 | 0.01197  | 1.92207 | 0.47289265 | 0.600259942 | -0.127 |
| cg21806273 | II | 37 | 1 | 247578953 | NLRP3;NLRP3      | 0.5  | 0.00432  | 2.36443 | 0.35930575 | 0.486457323 | -0.127 |
| cg22076676 | II | 37 | 2 | 43503935  | THADA;THADA      | 0.54 | 0.0014   | 2.85345 | 0.5469924  | 0.673925601 | -0.127 |
| cg02444957 | II | 37 | 2 | 69440951  | ANTXR1           | 0.42 | 0.02991  | 1.52413 | 0.70946528 | 0.582830025 | 0.127  |
| cg20945085 | I  | 37 | 2 | 74875227  | C2orf65          | 0.58 | 0.00041  | 3.39184 | 0.33719936 | 0.463858995 | -0.127 |
| cg23051299 | I  | 37 | 2 | 75938289  | C2orf3           | 0.5  | 0.00432  | 2.36443 | 0.29877492 | 0.172059524 | 0.127  |
| cg13149147 | II | 37 | 2 | 105757726 |                  | 0.46 | 0.01197  | 1.92207 | 0.40937841 | 0.536349124 | -0.127 |
| cg26084700 | I  | 37 | 2 | 231693479 |                  | 0.67 | 2.34E-05 | 4.63072 | 0.56383098 | 0.437183506 | 0.127  |
| cg04528931 | II | 37 | 2 | 240162187 | HDAC4            | 0.42 | 0.02991  | 1.52413 | 0.1236549  | 0.25018618  | -0.127 |
| cg06578111 | II | 37 | 3 | 13546418  | HDAC11;HDAC11    | 0.5  | 0.00432  | 2.36443 | 0.71085164 | 0.58416153  | 0.127  |
| cg04363536 | I  | 37 | 3 | 49466872  | NICN1            | 0.62 | 0.0001   | 3.98291 | 0.600771   | 0.474226102 | 0.127  |
| cg18521796 | II | 37 | 3 | 128713631 | KIAA1257         | 0.58 | 0.00041  | 3.39184 | 0.58069493 | 0.707584803 | -0.127 |
| cg16824282 | II | 37 | 3 | 128779590 | GP9              | 0.5  | 0.00432  | 2.36443 | 0.18114623 | 0.308210796 | -0.127 |
| cg07578772 | II | 37 | 3 | 150420821 | FAM194A          | 0.54 | 0.0014   | 2.85345 | 0.59473976 | 0.467551571 | 0.127  |
| cg03805566 | II | 37 | 3 | 183245952 | KLHL6            | 0.58 | 0.00041  | 3.39184 | 0.80303823 | 0.675660514 | 0.127  |
| cg24394172 | II | 37 | 4 | 46995203  | GABRA4           | 0.5  | 0.00432  | 2.36443 | 0.36311819 | 0.489999096 | -0.127 |
| cg11677852 | II | 37 | 5 | 1108876   | SLC12A7          | 0.54 | 0.0014   | 2.85345 | 0.57207836 | 0.699080531 | -0.127 |
| cg26876242 | II | 37 | 5 | 149115085 | PPARGC1B         | 0.46 | 0.01197  | 1.92207 | 0.73340505 | 0.860809946 | -0.127 |
| cg04699519 | II | 37 | 6 | 16306096  | ATXN1;ATXN1      | 0.42 | 0.02991  | 1.52413 | 0.6696425  | 0.542176438 | 0.127  |
| cg06108383 | II | 37 | 6 | 32120899  | PPT2;PRRT1;PPT2  | 0.42 | 0.02991  | 1.52413 | 0.79981577 | 0.672721762 | 0.127  |
| cg11453837 | II | 37 | 6 | 32810551  | PSMB8;PSMB8      | 0.5  | 0.00432  | 2.36443 | 0.72292222 | 0.595857437 | 0.127  |
| cg05454562 | II | 37 | 6 | 33254447  | WDR46;WDR46      | 0.5  | 0.00432  | 2.36443 | 0.77616659 | 0.903044755 | -0.127 |
| cg06639585 | II | 37 | 6 | 36236936  | PNPLA1;PNPLA1;PN | 0.5  | 0.00432  | 2.36443 | 0.57933963 | 0.706130956 | -0.127 |
| cg07017242 | II | 37 | 7 | 128047441 | IMPDH1;IMPDH1;I  | 0.54 | 0.0014   | 2.85345 | 0.57568588 | 0.448381542 | 0.127  |
| cg21579209 | II | 37 | 7 | 138620362 | KIAA1549;KIAA154 | 0.5  | 0.00432  | 2.36443 | 0.25559061 | 0.382127663 | -0.127 |
| cg03489712 | II | 37 | 7 | 143076881 | ZYX;ZYX          | 0.46 | 0.01197  | 1.92207 | 0.53027078 | 0.657106776 | -0.127 |
| cg15316716 | I  | 37 | 8 | 21769797  | DOK2             | 0.5  | 0.00432  | 2.36443 | 0.69940408 | 0.572121791 | 0.127  |

|            |    |    |    |                            |      |          |         |            |             |        |
|------------|----|----|----|----------------------------|------|----------|---------|------------|-------------|--------|
| cg22586603 | II | 37 | 8  | 129985596                  | 0.5  | 0.00432  | 2.36443 | 0.56729746 | 0.694031771 | -0.127 |
| cg16305292 | II | 37 | 8  | 142219965                  | 0.46 | 0.01197  | 1.92207 | 0.68132031 | 0.808451198 | -0.127 |
| cg09911401 | II | 37 | 10 | 29827566 SVIL;SVIL         | 0.46 | 0.01197  | 1.92207 | 0.88079342 | 0.753367809 | 0.127  |
| cg22715761 | II | 37 | 10 | 88428147 LDB3;LDB3;LDB3;LI | 0.46 | 0.01197  | 1.92207 | 0.68807472 | 0.561545064 | 0.127  |
| cg01418188 | II | 37 | 11 | 3145609 OSBPL5;OSBPL5;OS   | 0.46 | 0.01197  | 1.92207 | 0.31636869 | 0.443429094 | -0.127 |
| cg16801797 | II | 37 | 11 | 20043509 NAV2;NAV2;NAV2;I  | 0.46 | 0.01197  | 1.92207 | 0.38148363 | 0.508844327 | -0.127 |
| cg19349861 | I  | 37 | 11 | 133402246 OPCML;OPCML      | 0.67 | 2.34E-05 | 4.63072 | 0.41408755 | 0.287117665 | 0.127  |
| cg03224812 | II | 37 | 12 | 3807404 EFCAB4B;EFCAB4B;   | 0.5  | 0.00432  | 2.36443 | 0.73434467 | 0.861116287 | -0.127 |
| cg02082571 | II | 37 | 12 | 8276718 CLEC4A;CLEC4A;CLI  | 0.5  | 0.00432  | 2.36443 | 0.40898472 | 0.53580829  | -0.127 |
| cg22958090 | I  | 37 | 12 | 52627438 KRT7              | 0.46 | 0.01197  | 1.92207 | 0.25570197 | 0.382829109 | -0.127 |
| cg26477856 | II | 37 | 12 | 56324915 DGKA;DGKA;DGKA;   | 0.62 | 0.0001   | 3.98291 | 0.53681457 | 0.410219263 | 0.127  |
| cg17651972 | II | 37 | 12 | 57620054 NXPH4             | 0.54 | 0.0014   | 2.85345 | 0.2757146  | 0.403155687 | -0.127 |
| cg16134678 | I  | 37 | 13 | 25670187 PABPC3            | 0.42 | 0.02991  | 1.52413 | 0.32121522 | 0.194230083 | 0.127  |
| cg03185794 | II | 37 | 13 | 101237439                  | 0.5  | 0.00432  | 2.36443 | 0.49936329 | 0.372464188 | 0.127  |
| cg10807643 | I  | 37 | 14 | 55907417 TBPL2             | 0.42 | 0.02991  | 1.52413 | 0.63396883 | 0.760501672 | -0.127 |
| cg21235823 | II | 37 | 14 | 93260203 GOLGA5            | 0.71 | 4.57E-06 | 5.34042 | 0.19726786 | 0.324383606 | -0.127 |
| cg03462322 | II | 37 | 16 | 126397 MPG                 | 0.5  | 0.00432  | 2.36443 | 0.19874882 | 0.325705671 | -0.127 |
| cg01573635 | II | 37 | 16 | 10788751 TEKT5;TEKT5       | 0.54 | 0.0014   | 2.85345 | 0.72539235 | 0.597897623 | 0.127  |
| cg27097542 | II | 37 | 16 | 11706435                   | 0.46 | 0.01197  | 1.92207 | 0.20310069 | 0.329827175 | -0.127 |
| cg27565277 | II | 37 | 16 | 17228474 XYLT1             | 0.42 | 0.02991  | 1.52413 | 0.78369429 | 0.65658668  | 0.127  |
| cg07531182 | II | 37 | 16 | 17299114 XYLT1             | 0.62 | 0.0001   | 3.98291 | 0.56685549 | 0.693670983 | -0.127 |
| cg00888605 | II | 37 | 16 | 71523475 ZNF19             | 0.58 | 0.00041  | 3.39184 | 0.66274212 | 0.789573562 | -0.127 |
| cg06190046 | II | 37 | 16 | 83986382 OSGIN1;OSGIN1;OS  | 0.42 | 0.02991  | 1.52413 | 0.28710108 | 0.413648993 | -0.127 |
| cg06948222 | II | 37 | 16 | 87958493 CA5A              | 0.5  | 0.00432  | 2.36443 | 0.76173344 | 0.635126582 | 0.127  |
| cg22664962 | II | 37 | 17 | 22191979                   | 0.46 | 0.01197  | 1.92207 | 0.56143414 | 0.688908655 | -0.127 |
| cg14173815 | II | 37 | 17 | 27049557 RPL23A;SNORD42A   | 0.42 | 0.02991  | 1.52413 | 0.65505289 | 0.528099369 | 0.127  |
| cg15295469 | II | 37 | 17 | 37080300                   | 0.54 | 0.0014   | 2.85345 | 0.38215565 | 0.509490368 | -0.127 |
| cg12610859 | II | 37 | 17 | 37822780 TCAP              | 0.5  | 0.00432  | 2.36443 | 0.68888557 | 0.815431276 | -0.127 |
| cg25649895 | II | 37 | 17 | 48356195 TMEM92;TMEM92     | 0.54 | 0.0014   | 2.85345 | 0.61477151 | 0.741888915 | -0.127 |
| cg24809269 | II | 37 | 17 | 74260692 FAM100B           | 0.46 | 0.01197  | 1.92207 | 0.63252408 | 0.50543005  | 0.127  |
| cg15796340 | II | 37 | 17 | 74527554 CYGB              | 0.42 | 0.02991  | 1.52413 | 0.57572217 | 0.449120361 | 0.127  |
| cg03221619 | II | 37 | 19 | 7767348 FCER2              | 0.46 | 0.01197  | 1.92207 | 0.58524645 | 0.457806538 | 0.127  |
| cg17114866 | II | 37 | 19 | 35222640                   | 0.79 | 1.06E-07 | 6.97389 | 0.58733312 | 0.714026974 | -0.127 |

|            |    |    |    |                            |      |          |         |            |             |        |
|------------|----|----|----|----------------------------|------|----------|---------|------------|-------------|--------|
| cg23942508 | II | 37 | 19 | 45201924 CEACAM16          | 0.5  | 0.00432  | 2.36443 | 0.5503541  | 0.422985404 | 0.127  |
| cg17507897 | II | 37 | 20 | 17943694 SNX5;SNORD17;SN   | 0.46 | 0.01197  | 1.92207 | 0.76822141 | 0.641001429 | 0.127  |
| cg10167508 | II | 37 | 20 | 46988400 LOC284749         | 0.54 | 0.0014   | 2.85345 | 0.69399759 | 0.567221941 | 0.127  |
| cg11632679 | II | 37 | 20 | 56759082                   | 0.46 | 0.01197  | 1.92207 | 0.71072324 | 0.58406279  | 0.127  |
| cg09468832 | II | 37 | 21 | 45199094                   | 0.54 | 0.0014   | 2.85345 | 0.20461592 | 0.331276529 | -0.127 |
| cg02687883 | II | 37 | 1  | 2266431 MORN1              | 0.58 | 0.00041  | 3.39184 | 0.69326882 | 0.56679784  | 0.126  |
| cg15131146 | II | 37 | 1  | 26101755 MAN1C1            | 0.5  | 0.00432  | 2.36443 | 0.3078643  | 0.181827252 | 0.126  |
| cg22228439 | II | 37 | 1  | 46766431 LRRC41            | 0.5  | 0.00432  | 2.36443 | 0.53879191 | 0.664425047 | -0.126 |
| cg16416987 | II | 37 | 1  | 155177561 THBS3;MTX1;MTX1  | 0.54 | 0.0014   | 2.85345 | 0.27215032 | 0.398571898 | -0.126 |
| cg20741040 | II | 37 | 1  | 230566509                  | 0.42 | 0.02991  | 1.52413 | 0.24666043 | 0.372987827 | -0.126 |
| cg01569295 | II | 37 | 1  | 231155862 MIR1182;FAM89A   | 0.67 | 2.34E-05 | 4.63072 | 0.72047904 | 0.846541601 | -0.126 |
| cg05962382 | II | 37 | 2  | 130345044                  | 0.5  | 0.00432  | 2.36443 | 0.61562172 | 0.741319313 | -0.126 |
| cg12004641 | II | 37 | 2  | 218750749 TNS1             | 0.54 | 0.0014   | 2.85345 | 0.80550627 | 0.679927071 | 0.126  |
| cg13916298 | II | 37 | 3  | 108896099 C3orf66          | 0.58 | 0.00041  | 3.39184 | 0.31312804 | 0.439035068 | -0.126 |
| cg04224041 | II | 37 | 4  | 1220556 CTBP1;CTBP1        | 0.54 | 0.0014   | 2.85345 | 0.65439579 | 0.780039877 | -0.126 |
| cg14967987 | II | 37 | 4  | 3204843 HTT                | 0.46 | 0.01197  | 1.92207 | 0.5654138  | 0.439759609 | 0.126  |
| cg11080651 | II | 37 | 5  | 10445523 ROPN1L            | 0.5  | 0.00432  | 2.36443 | 0.25307267 | 0.379206389 | -0.126 |
| cg27223047 | II | 37 | 5  | 127874825 FBN2             | 0.46 | 0.01197  | 1.92207 | 0.17786206 | 0.303863705 | -0.126 |
| cg02125316 | I  | 37 | 5  | 170878209 FGF18            | 0.42 | 0.02991  | 1.52413 | 0.0384002  | 0.164040177 | -0.126 |
| cg12247101 | I  | 37 | 6  | 30653549 KIAA1949;KIAA1949 | 0.54 | 0.0014   | 2.85345 | 0.47854126 | 0.352420609 | 0.126  |
| cg02673107 | II | 37 | 6  | 33138131 COL11A2;COL11A2;  | 0.5  | 0.00432  | 2.36443 | 0.3035472  | 0.177495663 | 0.126  |
| cg04813787 | II | 37 | 6  | 167814397                  | 0.46 | 0.01197  | 1.92207 | 0.67350649 | 0.547706934 | 0.126  |
| cg05006142 | II | 37 | 6  | 170536124                  | 0.62 | 0.0001   | 3.98291 | 0.71215413 | 0.838538411 | -0.126 |
| cg05107246 | II | 37 | 7  | 31441                      | 0.46 | 0.01197  | 1.92207 | 0.49528168 | 0.621533686 | -0.126 |
| cg16784234 | II | 37 | 7  | 530475                     | 0.54 | 0.0014   | 2.85345 | 0.65201741 | 0.526151385 | 0.126  |
| cg25315312 | I  | 37 | 7  | 2020528 MAD1L1;MAD1L1;M    | 0.5  | 0.00432  | 2.36443 | 0.60362114 | 0.478024694 | 0.126  |
| cg08933276 | II | 37 | 7  | 2770410 GNA12              | 0.46 | 0.01197  | 1.92207 | 0.66986234 | 0.796044591 | -0.126 |
| cg04682905 | II | 37 | 7  | 5523636 FBXL18             | 0.54 | 0.0014   | 2.85345 | 0.58905443 | 0.715429904 | -0.126 |
| cg07621224 | II | 37 | 7  | 50355506 IKZF1             | 0.46 | 0.01197  | 1.92207 | 0.57502913 | 0.449408476 | 0.126  |
| cg23129573 | I  | 37 | 7  | 73442487 ELN;ELN;ELN;ELN;E | 0.62 | 0.0001   | 3.98291 | 0.14175509 | 0.268203912 | -0.126 |
| cg03461678 | II | 37 | 7  | 100859600 ZNHIT1;PLOD3     | 0.67 | 2.34E-05 | 4.63072 | 0.65056571 | 0.776752284 | -0.126 |
| cg22619824 | II | 37 | 7  | 116786606 ST7;ST7;ST7OT2   | 0.46 | 0.01197  | 1.92207 | 0.61889805 | 0.745106188 | -0.126 |
| cg00158770 | II | 37 | 8  | 19271585 CSGALNACT1;CSGA   | 0.46 | 0.01197  | 1.92207 | 0.7511398  | 0.877505588 | -0.126 |

|            |    |    |    |                            |      |         |         |            |             |        |
|------------|----|----|----|----------------------------|------|---------|---------|------------|-------------|--------|
| cg23494863 | I  | 37 | 8  | 38009476 STAR;STAR         | 0.5  | 0.00432 | 2.36443 | 0.59379306 | 0.719542893 | -0.126 |
| cg01976921 | II | 37 | 8  | 38342087                   | 0.54 | 0.0014  | 2.85345 | 0.54231697 | 0.667908989 | -0.126 |
| cg19352832 | II | 37 | 8  | 42608976 CHRNA6            | 0.5  | 0.00432 | 2.36443 | 0.66274796 | 0.537139885 | 0.126  |
| cg19611886 | II | 37 | 8  | 103821171                  | 0.5  | 0.00432 | 2.36443 | 0.27984811 | 0.405565938 | -0.126 |
| cg11006453 | I  | 37 | 8  | 141599185 EIF2C2;EIF2C2    | 0.42 | 0.02991 | 1.52413 | 0.76400102 | 0.638454261 | 0.126  |
| cg16899498 | I  | 37 | 8  | 144513907 MAFA             | 0.62 | 0.0001  | 3.98291 | 0.26557996 | 0.1393692   | 0.126  |
| cg08006727 | II | 37 | 9  | 116061614 RNF183           | 0.42 | 0.02991 | 1.52413 | 0.73701585 | 0.611208141 | 0.126  |
| cg14443472 | II | 37 | 9  | 129266352 FAM125B          | 0.5  | 0.00432 | 2.36443 | 0.70261666 | 0.577067321 | 0.126  |
| cg14611112 | II | 37 | 9  | 139643351 LCN6             | 0.5  | 0.00432 | 2.36443 | 0.30640701 | 0.432345884 | -0.126 |
| cg07191657 | II | 37 | 10 | 14478541 MIR1265           | 0.5  | 0.00432 | 2.36443 | 0.45686512 | 0.582837112 | -0.126 |
| cg11889730 | II | 37 | 10 | 37967356                   | 0.5  | 0.00432 | 2.36443 | 0.53450594 | 0.408651415 | 0.126  |
| cg06259934 | I  | 37 | 10 | 81034374 ZMIZ1             | 0.5  | 0.00432 | 2.36443 | 0.75836526 | 0.884745265 | -0.126 |
| cg02795981 | II | 37 | 10 | 81045119 ZMIZ1             | 0.5  | 0.00432 | 2.36443 | 0.65328596 | 0.527469764 | 0.126  |
| cg22593342 | II | 37 | 10 | 82219410 TSPAN14;TSPAN14   | 0.46 | 0.01197 | 1.92207 | 0.67454975 | 0.548344607 | 0.126  |
| cg09614415 | I  | 37 | 10 | 129535509 FOXI2            | 0.58 | 0.00041 | 3.39184 | 0.11720014 | 0.243379365 | -0.126 |
| cg02323003 | II | 37 | 10 | 130525659                  | 0.46 | 0.01197 | 1.92207 | 0.49629668 | 0.370534749 | 0.126  |
| cg17416793 | II | 37 | 11 | 2846932 KCNQ1;KCNQ1        | 0.54 | 0.0014  | 2.85345 | 0.45336215 | 0.579103916 | -0.126 |
| cg15172739 | II | 37 | 11 | 62621258 SNORD30;SNORD21   | 0.5  | 0.00432 | 2.36443 | 0.76974112 | 0.643619591 | 0.126  |
| cg08672956 | II | 37 | 11 | 116640933 BUD13;BUD13      | 0.62 | 0.0001  | 3.98291 | 0.7632198  | 0.889084093 | -0.126 |
| cg17318719 | II | 37 | 11 | 117959349 TMPRSS4;TMPRSS4  | 0.62 | 0.0001  | 3.98291 | 0.24134116 | 0.367108325 | -0.126 |
| cg15712304 | I  | 37 | 11 | 125227489 PKNOX2           | 0.5  | 0.00432 | 2.36443 | 0.76111961 | 0.63485756  | 0.126  |
| cg21793437 | II | 37 | 12 | 2734591 CACNA1C;CACNA1C    | 0.58 | 0.00041 | 3.39184 | 0.29279995 | 0.419142168 | -0.126 |
| cg03539765 | I  | 37 | 12 | 9217390 LOC144571          | 0.46 | 0.01197 | 1.92207 | 0.09650354 | 0.222462187 | -0.126 |
| cg24279017 | II | 37 | 12 | 11877740 ETV6              | 0.54 | 0.0014  | 2.85345 | 0.58148789 | 0.707306301 | -0.126 |
| cg10205310 | II | 37 | 12 | 117131820                  | 0.5  | 0.00432 | 2.36443 | 0.71355168 | 0.587525759 | 0.126  |
| cg01816936 | II | 37 | 12 | 123518888 PITPNM2          | 0.58 | 0.00041 | 3.39184 | 0.21095521 | 0.33654005  | -0.126 |
| cg17187521 | II | 37 | 12 | 125003379 NCOR2;NCOR2      | 0.42 | 0.02991 | 1.52413 | 0.25431933 | 0.380188651 | -0.126 |
| cg11334728 | II | 37 | 12 | 132697723 GALNT9           | 0.58 | 0.00041 | 3.39184 | 0.74909686 | 0.623007514 | 0.126  |
| cg08357012 | I  | 37 | 13 | 99090919 FARP1             | 0.42 | 0.02991 | 1.52413 | 0.88445899 | 0.758539913 | 0.126  |
| cg00320765 | II | 37 | 14 | 69264333 C14orf181         | 0.46 | 0.01197 | 1.92207 | 0.7500554  | 0.623755839 | 0.126  |
| cg25561904 | II | 37 | 14 | 104165401 XRCC3;XRCC3;XRCC | 0.42 | 0.02991 | 1.52413 | 0.69322145 | 0.567444386 | 0.126  |
| cg01767544 | I  | 37 | 14 | 106321115                  | 0.46 | 0.01197 | 1.92207 | 0.87466683 | 0.748845141 | 0.126  |
| cg02574101 | II | 37 | 15 | 78286737 LOC91450          | 0.42 | 0.02991 | 1.52413 | 0.69464631 | 0.568976907 | 0.126  |

|            |    |    |    |                            |      |          |         |            |             |        |
|------------|----|----|----|----------------------------|------|----------|---------|------------|-------------|--------|
| cg11407210 | II | 37 | 15 | 79199774                   | 0.54 | 0.0014   | 2.85345 | 0.54106875 | 0.667134286 | -0.126 |
| cg04188862 | I  | 37 | 15 | 88801474                   | 0.5  | 0.00432  | 2.36443 | 0.34019688 | 0.46612053  | -0.126 |
| cg10160612 | II | 37 | 16 | 30751899                   | 0.5  | 0.00432  | 2.36443 | 0.32532108 | 0.451161324 | -0.126 |
| cg10482356 | II | 37 | 16 | 56328421 GNAO1;GNAO1       | 0.54 | 0.0014   | 2.85345 | 0.6937152  | 0.820123815 | -0.126 |
| cg04187039 | II | 37 | 16 | 89048704                   | 0.54 | 0.0014   | 2.85345 | 0.55434939 | 0.428110646 | 0.126  |
| cg07474797 | II | 37 | 16 | 89185916 ACSF3;ACSF3;ACSF3 | 0.58 | 0.00041  | 3.39184 | 0.31042895 | 0.436102797 | -0.126 |
| cg21333338 | II | 37 | 17 | 2808456 RAP1GAP2;RAP1GA    | 0.42 | 0.02991  | 1.52413 | 0.61372948 | 0.740095555 | -0.126 |
| cg21327235 | II | 37 | 17 | 7643798 DNAH2              | 0.42 | 0.02991  | 1.52413 | 0.58717454 | 0.713503054 | -0.126 |
| cg22787468 | II | 37 | 17 | 27309113 SEZ6;SEZ6         | 0.54 | 0.0014   | 2.85345 | 0.72437032 | 0.850193137 | -0.126 |
| cg00950381 | I  | 37 | 17 | 74272364 QRIH2             | 0.5  | 0.00432  | 2.36443 | 0.6152814  | 0.488937164 | 0.126  |
| cg19536407 | I  | 37 | 17 | 79431331 BAHCC1            | 0.54 | 0.0014   | 2.85345 | 0.80126463 | 0.675104521 | 0.126  |
| cg02862897 | II | 37 | 17 | 79793088 DYSFIP1           | 0.54 | 0.0014   | 2.85345 | 0.66331365 | 0.788945342 | -0.126 |
| cg10168457 | II | 37 | 17 | 79882876 MAFG;MAFG         | 0.5  | 0.00432  | 2.36443 | 0.37987366 | 0.505539764 | -0.126 |
| cg15407058 | II | 37 | 17 | 80175989                   | 0.54 | 0.0014   | 2.85345 | 0.53639565 | 0.662397833 | -0.126 |
| cg27658601 | I  | 37 | 17 | 80794081 TBCD;ZNF750       | 0.54 | 0.0014   | 2.85345 | 0.799021   | 0.925281196 | -0.126 |
| cg14679780 | I  | 37 | 19 | 4059525 ZBTB7A             | 0.5  | 0.00432  | 2.36443 | 0.70438506 | 0.57825836  | 0.126  |
| cg16526705 | II | 37 | 19 | 17284481 MYO9B;MYO9B       | 0.46 | 0.01197  | 1.92207 | 0.64772956 | 0.773521343 | -0.126 |
| cg02189888 | II | 37 | 19 | 46582065                   | 0.54 | 0.0014   | 2.85345 | 0.29637966 | 0.422378414 | -0.126 |
| cg26415633 | II | 37 | 19 | 51327356 KLK1              | 0.54 | 0.0014   | 2.85345 | 0.6363301  | 0.510429614 | 0.126  |
| cg02928664 | I  | 37 | 19 | 54976506 CDC42EP5          | 0.46 | 0.01197  | 1.92207 | 0.08890387 | 0.215336795 | -0.126 |
| cg09971811 | II | 37 | 20 | 24930099 CST7;CST7         | 0.71 | 4.57E-06 | 5.34042 | 0.4485445  | 0.574159864 | -0.126 |
| cg24956391 | I  | 37 | 20 | 36011999 SRC;SRC           | 0.5  | 0.00432  | 2.36443 | 0.76807582 | 0.641699488 | 0.126  |
| cg06287548 | II | 37 | 21 | 34773372                   | 0.42 | 0.02991  | 1.52413 | 0.4447007  | 0.570306977 | -0.126 |
| cg04335714 | II | 37 | 22 | 25799070                   | 0.62 | 0.0001   | 3.98291 | 0.24185044 | 0.36808265  | -0.126 |
| cg24579970 | II | 37 | 1  | 7123315 CAMTA1             | 0.42 | 0.02991  | 1.52413 | 0.81637317 | 0.690903132 | 0.125  |
| cg25369262 | II | 37 | 1  | 46649132 TSPAN1            | 0.46 | 0.01197  | 1.92207 | 0.50143879 | 0.626350172 | -0.125 |
| cg19587237 | II | 37 | 1  | 54797076 SSBP3;SSBP3;SSBP3 | 0.54 | 0.0014   | 2.85345 | 0.21049016 | 0.335716394 | -0.125 |
| cg23633856 | II | 37 | 1  | 170636363 PRRX1;PRRX1      | 0.58 | 0.00041  | 3.39184 | 0.31548008 | 0.440099883 | -0.125 |
| cg05783585 | II | 37 | 1  | 201118532 TMEM9            | 0.5  | 0.00432  | 2.36443 | 0.85758529 | 0.733010866 | 0.125  |
| cg19081101 | I  | 37 | 1  | 203156625 CHI3L1           | 0.5  | 0.00432  | 2.36443 | 0.73713209 | 0.861712468 | -0.125 |
| cg16278077 | I  | 37 | 1  | 205635579 SLC45A3          | 0.5  | 0.00432  | 2.36443 | 0.85674    | 0.731784798 | 0.125  |
| cg15561613 | I  | 37 | 1  | 245851610 KIF26B           | 0.46 | 0.01197  | 1.92207 | 0.37040434 | 0.495492504 | -0.125 |
| cg23926598 | II | 37 | 2  | 47406858                   | 0.5  | 0.00432  | 2.36443 | 0.65059384 | 0.775574312 | -0.125 |

|            |    |    |    |                            |      |          |         |            |             |        |
|------------|----|----|----|----------------------------|------|----------|---------|------------|-------------|--------|
| cg21512179 | II | 37 | 2  | 85971548                   | 0.54 | 0.0014   | 2.85345 | 0.79919213 | 0.674412074 | 0.125  |
| cg00533827 | I  | 37 | 2  | 86163827                   | 0.54 | 0.0014   | 2.85345 | 0.82093553 | 0.945691747 | -0.125 |
| cg10236239 | II | 37 | 2  | 108994514 SULT1C4;SULT1C4  | 0.58 | 0.00041  | 3.39184 | 0.2425498  | 0.367915804 | -0.125 |
| cg20563269 | I  | 37 | 2  | 129104576                  | 0.5  | 0.00432  | 2.36443 | 0.7835559  | 0.908541184 | -0.125 |
| cg15175143 | II | 37 | 2  | 139538356 NXPH2            | 0.42 | 0.02991  | 1.52413 | 0.21774345 | 0.342678101 | -0.125 |
| cg02639108 | I  | 37 | 2  | 242711009                  | 0.42 | 0.02991  | 1.52413 | 0.78193752 | 0.906577628 | -0.125 |
| cg05020203 | II | 37 | 2  | 242968829                  | 0.5  | 0.00432  | 2.36443 | 0.58850697 | 0.463840072 | 0.125  |
| cg15044270 | II | 37 | 3  | 196065485 TM4SF19          | 0.5  | 0.00432  | 2.36443 | 0.32499861 | 0.449626531 | -0.125 |
| cg26131315 | II | 37 | 4  | 140787316 MAML3            | 0.58 | 0.00041  | 3.39184 | 0.89801646 | 0.773456515 | 0.125  |
| cg14817490 | II | 37 | 5  | 392920 AHRR                | 0.42 | 0.02991  | 1.52413 | 0.42674205 | 0.551575571 | -0.125 |
| cg00911351 | II | 37 | 5  | 140767255 PCDHGA4;PCDHGA4  | 0.5  | 0.00432  | 2.36443 | 0.16939173 | 0.294353331 | -0.125 |
| cg08491188 | II | 37 | 5  | 140777503 PCDHGA4;PCDHGA4  | 0.62 | 0.0001   | 3.98291 | 0.19273247 | 0.31777927  | -0.125 |
| cg11671363 | I  | 37 | 5  | 148810177 MIR145;LOC728264 | 0.5  | 0.00432  | 2.36443 | 0.77217757 | 0.897302013 | -0.125 |
| cg11327408 | II | 37 | 6  | 30297329 TRIM39;TRIM39     | 0.42 | 0.02991  | 1.52413 | 0.75087145 | 0.876122147 | -0.125 |
| cg25351606 | I  | 37 | 6  | 100917427                  | 0.46 | 0.01197  | 1.92207 | 0.19245467 | 0.317065303 | -0.125 |
| cg08250108 | II | 37 | 6  | 170425832                  | 0.67 | 2.34E-05 | 4.63072 | 0.80073089 | 0.675533912 | 0.125  |
| cg13151425 | I  | 37 | 7  | 2561116 LFNG;LFNG;LFNG;LI  | 0.79 | 1.06E-07 | 6.97389 | 0.43795202 | 0.313329565 | 0.125  |
| cg12738008 | I  | 37 | 8  | 2037954 MYOM2              | 0.54 | 0.0014   | 2.85345 | 0.77812908 | 0.652976368 | 0.125  |
| cg12054981 | I  | 37 | 8  | 42037387 PLAT;PLAT         | 0.46 | 0.01197  | 1.92207 | 0.27117781 | 0.396464765 | -0.125 |
| cg02471183 | II | 37 | 8  | 67456683                   | 0.42 | 0.02991  | 1.52413 | 0.58970907 | 0.464875145 | 0.125  |
| cg21157725 | II | 37 | 9  | 136809652 VAV2;VAV2        | 0.42 | 0.02991  | 1.52413 | 0.54798536 | 0.422645375 | 0.125  |
| cg13941235 | II | 37 | 9  | 137270186 RXRA             | 0.46 | 0.01197  | 1.92207 | 0.44817654 | 0.573522209 | -0.125 |
| cg09838169 | I  | 37 | 10 | 134377481 INPP5A           | 0.5  | 0.00432  | 2.36443 | 0.86238847 | 0.737790809 | 0.125  |
| cg06080948 | I  | 37 | 10 | 135202877 PAOX;PAOX;PAOX   | 0.42 | 0.02991  | 1.52413 | 0.24711119 | 0.122084607 | 0.125  |
| cg26236329 | II | 37 | 11 | 57200325                   | 0.58 | 0.00041  | 3.39184 | 0.27440013 | 0.399348214 | -0.125 |
| cg11775521 | I  | 37 | 11 | 74178795 KCNE3             | 0.42 | 0.02991  | 1.52413 | 0.23010517 | 0.355172174 | -0.125 |
| cg19907915 | I  | 37 | 11 | 133821252 IGSF9B           | 0.5  | 0.00432  | 2.36443 | 0.79638117 | 0.671859253 | 0.125  |
| cg00522935 | II | 37 | 12 | 1964603 CACNA2D4           | 0.54 | 0.0014   | 2.85345 | 0.74446459 | 0.619394661 | 0.125  |
| cg01833890 | II | 37 | 12 | 2564063 CACNA1C;CACNA1C    | 0.5  | 0.00432  | 2.36443 | 0.40872135 | 0.533479463 | -0.125 |
| cg26538140 | II | 37 | 12 | 6996791                    | 0.42 | 0.02991  | 1.52413 | 0.39857705 | 0.523495425 | -0.125 |
| cg02883147 | II | 37 | 12 | 9217769 LOC144571          | 0.46 | 0.01197  | 1.92207 | 0.44469856 | 0.569424548 | -0.125 |
| cg04020713 | II | 37 | 12 | 53457968 TENC1;TENC1;TENC1 | 0.46 | 0.01197  | 1.92207 | 0.54691944 | 0.422331547 | 0.125  |
| cg25684349 | II | 37 | 12 | 107725084 BTBD11           | 0.54 | 0.0014   | 2.85345 | 0.36501635 | 0.240248893 | 0.125  |

|            |    |    |    |           |                      |      |          |         |            |             |        |
|------------|----|----|----|-----------|----------------------|------|----------|---------|------------|-------------|--------|
| cg26262840 | II | 37 | 14 | 90767686  | C14orf102;C14orf102  | 0.5  | 0.00432  | 2.36443 | 0.77381023 | 0.899221758 | -0.125 |
| cg10761141 | II | 37 | 14 | 94844776  | SERPINA1;SERPINA1    | 0.54 | 0.0014   | 2.85345 | 0.75666618 | 0.631695019 | 0.125  |
| cg24761597 | I  | 37 | 14 | 103984978 |                      | 0.62 | 0.0001   | 3.98291 | 0.61678933 | 0.491737611 | 0.125  |
| cg14905514 | II | 37 | 14 | 105998745 |                      | 0.46 | 0.01197  | 1.92207 | 0.59150459 | 0.466246555 | 0.125  |
| cg19938199 | II | 37 | 15 | 63233164  |                      | 0.5  | 0.00432  | 2.36443 | 0.46313904 | 0.588579264 | -0.125 |
| cg21275690 | II | 37 | 16 | 3072970   | HCFC1R1;HCFC1R1;     | 0.67 | 2.34E-05 | 4.63072 | 0.32214736 | 0.44730037  | -0.125 |
| cg08367804 | II | 37 | 16 | 3639160   | BTBD12               | 0.54 | 0.0014   | 2.85345 | 0.40762631 | 0.532295015 | -0.125 |
| cg06627532 | II | 37 | 16 | 81491312  | CMIP                 | 0.67 | 2.34E-05 | 4.63072 | 0.34378867 | 0.469025433 | -0.125 |
| cg16374343 | II | 37 | 17 | 1014352   | ABR;ABR              | 0.58 | 0.00041  | 3.39184 | 0.30093253 | 0.425467142 | -0.125 |
| cg06191091 | I  | 37 | 17 | 30583855  |                      | 0.42 | 0.02991  | 1.52413 | 0.82392222 | 0.699137098 | 0.125  |
| cg23901967 | II | 37 | 17 | 36890321  | CISD3;PCGF2          | 0.54 | 0.0014   | 2.85345 | 0.70412764 | 0.578934753 | 0.125  |
| cg05117208 | II | 37 | 17 | 40438312  | STAT5A               | 0.46 | 0.01197  | 1.92207 | 0.44932636 | 0.574304375 | -0.125 |
| cg20359349 | II | 37 | 17 | 41994531  | C17orf88             | 0.5  | 0.00432  | 2.36443 | 0.5711891  | 0.445948668 | 0.125  |
| cg24434387 | II | 37 | 17 | 45051692  |                      | 0.54 | 0.0014   | 2.85345 | 0.59499238 | 0.719731007 | -0.125 |
| cg06942183 | II | 37 | 17 | 46622607  | HOXB2                | 0.54 | 0.0014   | 2.85345 | 0.26519784 | 0.389894676 | -0.125 |
| cg16766914 | I  | 37 | 17 | 55962703  | CUEDC1               | 0.46 | 0.01197  | 1.92207 | 0.65828553 | 0.782912468 | -0.125 |
| cg10023862 | I  | 37 | 17 | 55962841  | CUEDC1               | 0.5  | 0.00432  | 2.36443 | 0.75097727 | 0.875499023 | -0.125 |
| cg23641597 | II | 37 | 17 | 70162036  |                      | 0.42 | 0.02991  | 1.52413 | 0.65020893 | 0.775023474 | -0.125 |
| cg16776035 | II | 37 | 17 | 74542680  |                      | 0.42 | 0.02991  | 1.52413 | 0.46297284 | 0.587993277 | -0.125 |
| cg27551910 | II | 37 | 17 | 79083905  | BAIAP2;BAIAP2;BAIAP2 | 0.42 | 0.02991  | 1.52413 | 0.44531515 | 0.31984982  | 0.125  |
| cg06511678 | II | 37 | 18 | 7038746   | LAMA1                | 0.5  | 0.00432  | 2.36443 | 0.30779743 | 0.433151085 | -0.125 |
| cg23693749 | II | 37 | 18 | 76399434  |                      | 0.46 | 0.01197  | 1.92207 | 0.50071938 | 0.625530098 | -0.125 |
| cg21394039 | II | 37 | 18 | 77116310  | ATP9B                | 0.46 | 0.01197  | 1.92207 | 0.72067703 | 0.595908555 | 0.125  |
| cg15664905 | II | 37 | 19 | 44009429  | PHLDB3               | 0.67 | 2.34E-05 | 4.63072 | 0.68948526 | 0.814011834 | -0.125 |
| cg10129493 | II | 37 | 19 | 51728586  | CD33;CD33            | 0.58 | 0.00041  | 3.39184 | 0.14977312 | 0.274824249 | -0.125 |
| cg24713204 | II | 37 | 19 | 57019373  | ZNF471               | 0.54 | 0.0014   | 2.85345 | 0.24275061 | 0.36793198  | -0.125 |
| cg26955850 | II | 37 | 20 | 3052345   | OXT                  | 0.58 | 0.00041  | 3.39184 | 0.32412066 | 0.449120317 | -0.125 |
| cg12485727 | II | 37 | 20 | 39762753  |                      | 0.58 | 0.00041  | 3.39184 | 0.7880343  | 0.663086995 | 0.125  |
| cg01373166 | II | 37 | 22 | 24823389  | ADORA2A              | 0.62 | 0.0001   | 3.98291 | 0.52763964 | 0.402945975 | 0.125  |
| cg05718255 | II | 37 | 22 | 35790141  | HMOX1                | 0.5  | 0.00432  | 2.36443 | 0.59182709 | 0.467120848 | 0.125  |
| cg17806661 | II | 37 | 22 | 37096133  | CACNG2               | 0.5  | 0.00432  | 2.36443 | 0.37565874 | 0.500384387 | -0.125 |
| cg02539402 | II | 37 | 22 | 43061182  |                      | 0.5  | 0.00432  | 2.36443 | 0.52575885 | 0.401166301 | 0.125  |
| cg02393107 | II | 37 | 1  | 2515692   |                      | 0.54 | 0.0014   | 2.85345 | 0.6929417  | 0.569109433 | 0.124  |

|            |    |    |   |           |                  |      |          |         |            |             |        |
|------------|----|----|---|-----------|------------------|------|----------|---------|------------|-------------|--------|
| cg08371190 | II | 37 | 1 | 87598514  | LOC339524;LOC339 | 0.58 | 0.00041  | 3.39184 | 0.56650509 | 0.690659379 | -0.124 |
| cg07213548 | II | 37 | 1 | 104616267 |                  | 0.5  | 0.00432  | 2.36443 | 0.60241399 | 0.726484303 | -0.124 |
| cg17496887 | II | 37 | 1 | 153387707 | S100A7A          | 0.46 | 0.01197  | 1.92207 | 0.74717934 | 0.871478684 | -0.124 |
| cg26400546 | II | 37 | 1 | 205499355 | CDK18;CDK18;CDK1 | 0.42 | 0.02991  | 1.52413 | 0.72291837 | 0.598660149 | 0.124  |
| cg22719308 | I  | 37 | 1 | 214725918 | PTPN14           | 0.5  | 0.00432  | 2.36443 | 0.19468827 | 0.318698983 | -0.124 |
| cg01498249 | II | 37 | 2 | 312940    |                  | 0.5  | 0.00432  | 2.36443 | 0.60920953 | 0.485465316 | 0.124  |
| cg21486510 | I  | 37 | 2 | 7171998   | RNF144A          | 0.54 | 0.0014   | 2.85345 | 0.37800098 | 0.502227587 | -0.124 |
| cg12018969 | II | 37 | 2 | 43350413  |                  | 0.46 | 0.01197  | 1.92207 | 0.68860841 | 0.812914507 | -0.124 |
| cg15742777 | II | 37 | 2 | 55339218  |                  | 0.46 | 0.01197  | 1.92207 | 0.13362449 | 0.257631154 | -0.124 |
| cg12910810 | II | 37 | 2 | 96662438  |                  | 0.46 | 0.01197  | 1.92207 | 0.45899156 | 0.582699346 | -0.124 |
| cg00423969 | II | 37 | 2 | 97359879  | FER1L5;FER1L5    | 0.54 | 0.0014   | 2.85345 | 0.25804857 | 0.382040609 | -0.124 |
| cg05886087 | II | 37 | 2 | 102758186 |                  | 0.54 | 0.0014   | 2.85345 | 0.46085408 | 0.584530665 | -0.124 |
| cg04361749 | II | 37 | 2 | 240980455 |                  | 0.46 | 0.01197  | 1.92207 | 0.56186617 | 0.437872505 | 0.124  |
| cg01637169 | II | 37 | 3 | 13459281  | NUP210           | 0.58 | 0.00041  | 3.39184 | 0.49309144 | 0.368840363 | 0.124  |
| cg01965673 | II | 37 | 3 | 126700750 |                  | 0.42 | 0.02991  | 1.52413 | 0.5661251  | 0.442093498 | 0.124  |
| cg08140055 | II | 37 | 3 | 134369339 | KY               | 0.62 | 0.0001   | 3.98291 | 0.56084775 | 0.68472288  | -0.124 |
| cg14666404 | II | 37 | 3 | 183016948 | MCF2L2           | 0.62 | 0.0001   | 3.98291 | 0.47502266 | 0.599302409 | -0.124 |
| cg10134910 | II | 37 | 4 | 1076041   | RNF212;RNF212    | 0.54 | 0.0014   | 2.85345 | 0.37532512 | 0.251415654 | 0.124  |
| cg10869531 | II | 37 | 4 | 2808489   | SH3BP2           | 0.46 | 0.01197  | 1.92207 | 0.61111799 | 0.487475287 | 0.124  |
| cg19241973 | I  | 37 | 4 | 8262688   |                  | 0.42 | 0.02991  | 1.52413 | 0.48079063 | 0.604881212 | -0.124 |
| cg09988671 | II | 37 | 4 | 8351738   |                  | 0.46 | 0.01197  | 1.92207 | 0.70179315 | 0.578020864 | 0.124  |
| cg17854066 | II | 37 | 4 | 55575932  | KIT;KIT          | 0.42 | 0.02991  | 1.52413 | 0.19787798 | 0.321448035 | -0.124 |
| cg26703534 | II | 37 | 5 | 377358    | AHRR             | 0.58 | 0.00041  | 3.39184 | 0.63374178 | 0.757709628 | -0.124 |
| cg22649349 | II | 37 | 6 | 3848898   | FAM50B           | 0.58 | 0.00041  | 3.39184 | 0.6779693  | 0.801881817 | -0.124 |
| cg08696107 | II | 37 | 6 | 29759949  | HCG4             | 0.46 | 0.01197  | 1.92207 | 0.16931115 | 0.293743437 | -0.124 |
| cg13401893 | I  | 37 | 6 | 30039432  | RNF39;RNF39      | 0.5  | 0.00432  | 2.36443 | 0.16078025 | 0.28506336  | -0.124 |
| cg00174718 | II | 37 | 6 | 47136110  |                  | 0.46 | 0.01197  | 1.92207 | 0.44819294 | 0.571796007 | -0.124 |
| cg07561610 | I  | 37 | 6 | 149771807 | ZC3H12D          | 0.58 | 0.00041  | 3.39184 | 0.66715435 | 0.791469609 | -0.124 |
| cg07143083 | I  | 37 | 7 | 70597921  | WBSCR17          | 0.46 | 0.01197  | 1.92207 | 0.16074141 | 0.284286583 | -0.124 |
| cg03431524 | II | 37 | 7 | 100142441 | AGFG2            | 0.46 | 0.01197  | 1.92207 | 0.70933424 | 0.585748744 | 0.124  |
| cg11747183 | I  | 37 | 7 | 149918226 |                  | 0.46 | 0.01197  | 1.92207 | 0.15751542 | 0.281844897 | -0.124 |
| cg07811198 | II | 37 | 7 | 153585368 | DPP6             | 0.67 | 2.34E-05 | 4.63072 | 0.25564745 | 0.379466514 | -0.124 |
| cg06152586 | I  | 37 | 7 | 157890659 | PTPRN2;PTPRN2;PT | 0.46 | 0.01197  | 1.92207 | 0.77494829 | 0.898675652 | -0.124 |

|            |    |    |    |                            |      |          |         |            |             |        |
|------------|----|----|----|----------------------------|------|----------|---------|------------|-------------|--------|
| cg22307444 | I  | 37 | 8  | 672057 ERICH1              | 0.46 | 0.01197  | 1.92207 | 0.37980069 | 0.503443649 | -0.124 |
| cg15518883 | II | 37 | 9  | 35650561 SIT1              | 0.67 | 2.34E-05 | 4.63072 | 0.59056229 | 0.466990244 | 0.124  |
| cg13447566 | I  | 37 | 9  | 133801544 FIBCD1;FIBCD1    | 0.42 | 0.02991  | 1.52413 | 0.6987505  | 0.574818878 | 0.124  |
| cg00056066 | I  | 37 | 10 | 25010738 ARHGAP21          | 0.42 | 0.02991  | 1.52413 | 0.53514823 | 0.659582886 | -0.124 |
| cg25427524 | I  | 37 | 10 | 38739819 LOC399744         | 0.46 | 0.01197  | 1.92207 | 0.53715008 | 0.661361804 | -0.124 |
| cg19499884 | II | 37 | 10 | 102760724 LZTS2            | 0.46 | 0.01197  | 1.92207 | 0.34144645 | 0.46563206  | -0.124 |
| cg03022891 | I  | 37 | 11 | 1947791 TNNT3;TNNT3;TNN    | 0.42 | 0.02991  | 1.52413 | 0.55644289 | 0.680227636 | -0.124 |
| cg00491064 | II | 37 | 11 | 19681786 NAV2              | 0.42 | 0.02991  | 1.52413 | 0.79043782 | 0.666262701 | 0.124  |
| cg07092212 | II | 37 | 11 | 46382544 DGKZ;DGKZ;DGKZ;[  | 0.42 | 0.02991  | 1.52413 | 0.26996061 | 0.394228047 | -0.124 |
| cg03778108 | II | 37 | 11 | 47360129 MYBPC3            | 0.46 | 0.01197  | 1.92207 | 0.75185494 | 0.628186004 | 0.124  |
| cg19240569 | II | 37 | 11 | 63331821 HRASLS2           | 0.54 | 0.0014   | 2.85345 | 0.68822378 | 0.564689099 | 0.124  |
| cg00157359 | II | 37 | 11 | 66233183 PELI3;PELI3       | 0.42 | 0.02991  | 1.52413 | 0.3335591  | 0.209245601 | 0.124  |
| cg20705781 | II | 37 | 11 | 67070238 SSH3              | 0.58 | 0.00041  | 3.39184 | 0.35448684 | 0.478382605 | -0.124 |
| cg24101009 | II | 37 | 11 | 93863858 PANX1             | 0.62 | 0.0001   | 3.98291 | 0.64672584 | 0.770457739 | -0.124 |
| cg17983957 | II | 37 | 11 | 118083938 AMICA1;AMICA1;A  | 0.54 | 0.0014   | 2.85345 | 0.76659006 | 0.890719626 | -0.124 |
| cg02150262 | II | 37 | 11 | 124761914 ROBO4            | 0.5  | 0.00432  | 2.36443 | 0.77841369 | 0.654748217 | 0.124  |
| cg24860589 | II | 37 | 11 | 129941906 APLP2;APLP2;APLP | 0.71 | 4.57E-06 | 5.34042 | 0.80911761 | 0.932927918 | -0.124 |
| cg26244013 | II | 37 | 12 | 6470176 SCNN1A;SCNN1A;S    | 0.46 | 0.01197  | 1.92207 | 0.78814887 | 0.664190321 | 0.124  |
| cg20050826 | II | 37 | 12 | 52995295 KRT72;KRT72;KRT7  | 0.46 | 0.01197  | 1.92207 | 0.2633895  | 0.387130838 | -0.124 |
| cg14408356 | I  | 37 | 12 | 113528845 DTX1             | 0.58 | 0.00041  | 3.39184 | 0.73006878 | 0.606189363 | 0.124  |
| cg20566484 | II | 37 | 14 | 94489832                   | 0.46 | 0.01197  | 1.92207 | 0.71553268 | 0.591604083 | 0.124  |
| cg18371471 | I  | 37 | 14 | 101029794 BEGAIN;BEGAIN    | 0.42 | 0.02991  | 1.52413 | 0.90526761 | 0.781051718 | 0.124  |
| cg12395299 | II | 37 | 15 | 29349218 APBA2;APBA2       | 0.58 | 0.00041  | 3.39184 | 0.58544839 | 0.461063013 | 0.124  |
| cg17594424 | II | 37 | 15 | 44086040 MIR1282;SERF2     | 0.54 | 0.0014   | 2.85345 | 0.66445579 | 0.788369235 | -0.124 |
| cg19169932 | II | 37 | 15 | 62861955                   | 0.58 | 0.00041  | 3.39184 | 0.63942964 | 0.763728774 | -0.124 |
| cg22235407 | I  | 37 | 15 | 66209223 MEGF11            | 0.46 | 0.01197  | 1.92207 | 0.80829694 | 0.684656124 | 0.124  |
| cg14155397 | II | 37 | 15 | 66678782 MAP2K1            | 0.42 | 0.02991  | 1.52413 | 0.19394433 | 0.318393081 | -0.124 |
| cg20654462 | II | 37 | 15 | 93580092                   | 0.42 | 0.02991  | 1.52413 | 0.6126642  | 0.737065872 | -0.124 |
| cg01922891 | II | 37 | 16 | 4714647 MGRN1;MGRN1;M      | 0.54 | 0.0014   | 2.85345 | 0.62137791 | 0.745413277 | -0.124 |
| cg02115302 | II | 37 | 16 | 27237719 NSMCE1            | 0.54 | 0.0014   | 2.85345 | 0.53137037 | 0.407469511 | 0.124  |
| cg02697427 | I  | 37 | 16 | 29196668                   | 0.58 | 0.00041  | 3.39184 | 0.81248243 | 0.936063574 | -0.124 |
| cg09742346 | II | 37 | 16 | 81527501 CMIP;CMIP         | 0.54 | 0.0014   | 2.85345 | 0.70566182 | 0.829977971 | -0.124 |
| cg02185464 | I  | 37 | 16 | 84867338 CRISPLD2          | 0.42 | 0.02991  | 1.52413 | 0.93082941 | 0.806982983 | 0.124  |

|            |    |    |    |          |                   |      |          |         |            |             |        |
|------------|----|----|----|----------|-------------------|------|----------|---------|------------|-------------|--------|
| cg08732950 | II | 37 | 16 | 89023389 | CBFA2T3           | 0.5  | 0.00432  | 2.36443 | 0.30975774 | 0.433375193 | -0.124 |
| cg14897188 | II | 37 | 17 | 6917185  | RNASEK;C17orf49;C | 0.42 | 0.02991  | 1.52413 | 0.66491969 | 0.540792    | 0.124  |
| cg23365801 | I  | 37 | 17 | 7832909  | KCNAB3            | 0.42 | 0.02991  | 1.52413 | 0.70033819 | 0.576637472 | 0.124  |
| cg12130768 | II | 37 | 17 | 9550545  | USP43             | 0.46 | 0.01197  | 1.92207 | 0.46217606 | 0.337851083 | 0.124  |
| cg17442269 | II | 37 | 17 | 15650385 |                   | 0.46 | 0.01197  | 1.92207 | 0.7316227  | 0.607512879 | 0.124  |
| cg16928487 | II | 37 | 17 | 17741425 | SREBF1;SREBF1     | 0.5  | 0.00432  | 2.36443 | 0.33527752 | 0.458983346 | -0.124 |
| cg23682934 | II | 37 | 17 | 42885322 | GJC1;GJC1         | 0.42 | 0.02991  | 1.52413 | 0.55072159 | 0.426249821 | 0.124  |
| cg18402166 | II | 37 | 17 | 62778279 | LOC146880;LOC146  | 0.54 | 0.0014   | 2.85345 | 0.6585944  | 0.782896822 | -0.124 |
| cg04912316 | I  | 37 | 17 | 74266324 | FAM100B           | 0.58 | 0.00041  | 3.39184 | 0.72081488 | 0.596404563 | 0.124  |
| cg17922695 | II | 37 | 17 | 75451809 | SEPT9;SEPT9;SEPT9 | 0.42 | 0.02991  | 1.52413 | 0.70518608 | 0.581441621 | 0.124  |
| cg24759654 | II | 37 | 17 | 76801065 | USP36             | 0.46 | 0.01197  | 1.92207 | 0.8402155  | 0.71609397  | 0.124  |
| cg16115689 | II | 37 | 17 | 78764256 | RPTOR;RPTOR       | 0.5  | 0.00432  | 2.36443 | 0.37983539 | 0.256227138 | 0.124  |
| cg19563510 | I  | 37 | 17 | 79881483 | MAFG;MAFG         | 0.46 | 0.01197  | 1.92207 | 0.13359975 | 0.257356192 | -0.124 |
| cg12223090 | II | 37 | 17 | 80128788 | CCDC57            | 0.62 | 0.0001   | 3.98291 | 0.74389687 | 0.86830091  | -0.124 |
| cg03956820 | I  | 37 | 17 | 80190154 | SLC16A3;SLC16A3;S | 0.46 | 0.01197  | 1.92207 | 0.44449363 | 0.568603734 | -0.124 |
| cg24061208 | II | 37 | 18 | 14748250 | ANKRD30B;ANKRD3   | 0.46 | 0.01197  | 1.92207 | 0.19821839 | 0.321743981 | -0.124 |
| cg17004025 | II | 37 | 19 | 840795   | PRTN3             | 0.58 | 0.00041  | 3.39184 | 0.27145119 | 0.395543791 | -0.124 |
| cg26928195 | I  | 37 | 19 | 1624734  | TCF3;TCF3         | 0.62 | 0.0001   | 3.98291 | 0.61731161 | 0.741799269 | -0.124 |
| cg17617491 | II | 37 | 19 | 2607726  | GNG7              | 0.46 | 0.01197  | 1.92207 | 0.69542173 | 0.571007206 | 0.124  |
| cg26756949 | I  | 37 | 19 | 4654722  | TNFAIP8L1;TNFAIP8 | 0.5  | 0.00432  | 2.36443 | 0.76997258 | 0.646394267 | 0.124  |
| cg16672562 | I  | 37 | 19 | 46801672 | HIF3A;HIF3A;HIF3A | 0.46 | 0.01197  | 1.92207 | 0.57397247 | 0.6977601   | -0.124 |
| cg03078586 | II | 37 | 19 | 49469953 | FTL               | 0.5  | 0.00432  | 2.36443 | 0.68936904 | 0.813329678 | -0.124 |
| cg02412123 | II | 37 | 19 | 51628204 | SIGLEC9;SIGLEC9   | 0.67 | 2.34E-05 | 4.63072 | 0.31854361 | 0.442352945 | -0.124 |
| cg20962215 | II | 37 | 19 | 54713514 |                   | 0.5  | 0.00432  | 2.36443 | 0.38958045 | 0.513102549 | -0.124 |
| cg13396318 | II | 37 | 20 | 19866974 |                   | 0.58 | 0.00041  | 3.39184 | 0.60238027 | 0.726533295 | -0.124 |
| cg11173131 | II | 37 | 20 | 45179226 | C20orf123         | 0.42 | 0.02991  | 1.52413 | 0.13880205 | 0.26312312  | -0.124 |
| cg10309886 | II | 37 | 20 | 57407747 | GNASAS            | 0.42 | 0.02991  | 1.52413 | 0.25312008 | 0.377314109 | -0.124 |
| cg21221377 | II | 37 | 20 | 62574092 | UCKL1;MIR1914;MI  | 0.54 | 0.0014   | 2.85345 | 0.35664559 | 0.480425712 | -0.124 |
| cg14065109 | II | 37 | 21 | 47715006 | C21orf57          | 0.5  | 0.00432  | 2.36443 | 0.35842083 | 0.482846043 | -0.124 |
| cg06346307 | II | 37 | 22 | 19949965 | COMT;COMT;COMT    | 0.46 | 0.01197  | 1.92207 | 0.55960686 | 0.43563334  | 0.124  |
| cg03903451 | II | 37 | 22 | 44568913 | PARVG;PARVG;PAR   | 0.62 | 0.0001   | 3.98291 | 0.53212768 | 0.655904311 | -0.124 |
| cg12251779 | II | 37 | 22 | 45608440 | C22orf9;C22orf9   | 0.62 | 0.0001   | 3.98291 | 0.73502016 | 0.858939823 | -0.124 |
| cg23022809 | II | 37 | 1  | 2230923  | SKI               | 0.54 | 0.0014   | 2.85345 | 0.67832704 | 0.800956057 | -0.123 |

|            |    |    |   |                            |      |          |         |            |             |        |
|------------|----|----|---|----------------------------|------|----------|---------|------------|-------------|--------|
| cg09820729 | II | 37 | 1 | 12039712 MFN2;MFN2         | 0.54 | 0.0014   | 2.85345 | 0.68336106 | 0.806268069 | -0.123 |
| cg07319459 | II | 37 | 1 | 17448608                   | 0.42 | 0.02991  | 1.52413 | 0.6454607  | 0.522348234 | 0.123  |
| cg03220543 | II | 37 | 1 | 18092930 ACTL8             | 0.54 | 0.0014   | 2.85345 | 0.53879877 | 0.415411613 | 0.123  |
| cg11257888 | II | 37 | 1 | 24828096 RCAN3             | 0.5  | 0.00432  | 2.36443 | 0.6026827  | 0.479942894 | 0.123  |
| cg18128887 | I  | 37 | 1 | 24861708 RCAN3             | 0.54 | 0.0014   | 2.85345 | 0.24009014 | 0.116605311 | 0.123  |
| cg06903031 | II | 37 | 1 | 110644949                  | 0.58 | 0.00041  | 3.39184 | 0.34798023 | 0.47072102  | -0.123 |
| cg20946037 | II | 37 | 1 | 150582344                  | 0.54 | 0.0014   | 2.85345 | 0.79512364 | 0.917682058 | -0.123 |
| cg21937128 | II | 37 | 1 | 150971889 FAM63A;FAM63A;F  | 0.46 | 0.01197  | 1.92207 | 0.3228131  | 0.44533724  | -0.123 |
| cg16097041 | II | 37 | 1 | 154965544 FLAD1;LENEP;FLAD | 0.62 | 0.0001   | 3.98291 | 0.67767413 | 0.800609667 | -0.123 |
| cg27541604 | II | 37 | 1 | 159046451 AIM2;AIM2        | 0.42 | 0.02991  | 1.52413 | 0.71169422 | 0.588943109 | 0.123  |
| cg20284239 | II | 37 | 1 | 168091000 GPR161           | 0.54 | 0.0014   | 2.85345 | 0.73481007 | 0.857809084 | -0.123 |
| cg17932662 | II | 37 | 1 | 202123442 PTPN7;PTPN7      | 0.54 | 0.0014   | 2.85345 | 0.74342244 | 0.866661556 | -0.123 |
| cg10901806 | II | 37 | 1 | 203055422 MYOG             | 0.54 | 0.0014   | 2.85345 | 0.73276819 | 0.609736306 | 0.123  |
| cg01876531 | II | 37 | 1 | 208405868 PLXNA2           | 0.42 | 0.02991  | 1.52413 | 0.74532463 | 0.622393873 | 0.123  |
| cg17163729 | I  | 37 | 2 | 554372                     | 0.5  | 0.00432  | 2.36443 | 0.4308985  | 0.308145873 | 0.123  |
| cg24744014 | II | 37 | 2 | 11113304                   | 0.46 | 0.01197  | 1.92207 | 0.68727013 | 0.564696259 | 0.123  |
| cg19764540 | II | 37 | 2 | 26782423 OTOF              | 0.62 | 0.0001   | 3.98291 | 0.68911086 | 0.566126939 | 0.123  |
| cg24032691 | II | 37 | 2 | 31030372 CAPN13            | 0.5  | 0.00432  | 2.36443 | 0.56255212 | 0.439311515 | 0.123  |
| cg17639959 | II | 37 | 2 | 73297338 SFXN5             | 0.46 | 0.01197  | 1.92207 | 0.31340309 | 0.436376501 | -0.123 |
| cg25741837 | I  | 37 | 2 | 73452813 SMYD5             | 0.54 | 0.0014   | 2.85345 | 0.40863512 | 0.531226581 | -0.123 |
| cg13878360 | II | 37 | 3 | 64069147                   | 0.42 | 0.02991  | 1.52413 | 0.42733364 | 0.550000862 | -0.123 |
| cg11209289 | II | 37 | 3 | 138101415 MRAS;MRAS        | 0.54 | 0.0014   | 2.85345 | 0.84206365 | 0.71892251  | 0.123  |
| cg07766263 | II | 37 | 3 | 170303045 SLC7A14          | 0.58 | 0.00041  | 3.39184 | 0.36235065 | 0.485567336 | -0.123 |
| cg24973755 | I  | 37 | 4 | 1304972 MAEA;MAEA          | 0.46 | 0.01197  | 1.92207 | 0.7466326  | 0.623422565 | 0.123  |
| cg13117948 | II | 37 | 4 | 16086051 PROM1;PROM1       | 0.58 | 0.00041  | 3.39184 | 0.25284898 | 0.375918547 | -0.123 |
| cg25251374 | II | 37 | 4 | 185305932                  | 0.42 | 0.02991  | 1.52413 | 0.44636407 | 0.323369266 | 0.123  |
| cg21747070 | I  | 37 | 5 | 957535                     | 0.67 | 2.34E-05 | 4.63072 | 0.47492695 | 0.352256534 | 0.123  |
| cg20790798 | II | 37 | 5 | 1857306                    | 0.46 | 0.01197  | 1.92207 | 0.53971419 | 0.662438946 | -0.123 |
| cg11080540 | II | 37 | 5 | 54897272                   | 0.54 | 0.0014   | 2.85345 | 0.43110005 | 0.553700539 | -0.123 |
| cg05457480 | II | 37 | 5 | 139139201                  | 0.5  | 0.00432  | 2.36443 | 0.20147988 | 0.324017179 | -0.123 |
| cg11100481 | II | 37 | 5 | 149867577                  | 0.5  | 0.00432  | 2.36443 | 0.64203637 | 0.764717564 | -0.123 |
| cg01560676 | II | 37 | 5 | 172260799 ERGIC1           | 0.5  | 0.00432  | 2.36443 | 0.63861621 | 0.51545855  | 0.123  |
| cg20001791 | II | 37 | 6 | 16239799 GMPR              | 0.42 | 0.02991  | 1.52413 | 0.24936189 | 0.371952553 | -0.123 |

|            |    |    |    |                               |      |          |         |            |             |        |
|------------|----|----|----|-------------------------------|------|----------|---------|------------|-------------|--------|
| cg17670496 | I  | 37 | 6  | 29759972 HCG4                 | 0.5  | 0.00432  | 2.36443 | 0.09272033 | 0.215334586 | -0.123 |
| cg00252230 | II | 37 | 6  | 66013901 EYS                  | 0.67 | 2.34E-05 | 4.63072 | 0.72409474 | 0.846862655 | -0.123 |
| cg23752752 | I  | 37 | 7  | 4778908 FOXK1                 | 0.5  | 0.00432  | 2.36443 | 0.52870691 | 0.652120307 | -0.123 |
| cg21341645 | II | 37 | 7  | 155091523 INSIG1;INSIG1;INSIK | 0.42 | 0.02991  | 1.52413 | 0.52996391 | 0.406872631 | 0.123  |
| cg08772302 | II | 37 | 8  | 37826337                      | 0.54 | 0.0014   | 2.85345 | 0.28346129 | 0.406518377 | -0.123 |
| cg16231917 | II | 37 | 8  | 128930166 PVT1                | 0.5  | 0.00432  | 2.36443 | 0.38889418 | 0.512378171 | -0.123 |
| cg15628518 | I  | 37 | 8  | 145025059 PLEC1;PLEC1;PLEC1   | 0.46 | 0.01197  | 1.92207 | 0.39301886 | 0.515992916 | -0.123 |
| cg13820205 | II | 37 | 9  | 132448040 PRRX2               | 0.5  | 0.00432  | 2.36443 | 0.75767622 | 0.634302295 | 0.123  |
| cg06431514 | II | 37 | 10 | 11299076 CUGBP2;CUGBP2;C      | 0.46 | 0.01197  | 1.92207 | 0.65577942 | 0.532911506 | 0.123  |
| cg10603156 | II | 37 | 10 | 13732625 FRMD4A               | 0.54 | 0.0014   | 2.85345 | 0.75342516 | 0.630162516 | 0.123  |
| cg08834573 | II | 37 | 10 | 77005666                      | 0.5  | 0.00432  | 2.36443 | 0.69002009 | 0.567389449 | 0.123  |
| cg07081759 | II | 37 | 10 | 126330905 FAM53B              | 0.42 | 0.02991  | 1.52413 | 0.47438009 | 0.596985725 | -0.123 |
| cg08160246 | II | 37 | 11 | 2709914 KCNQ1;KCNQ1OT1;       | 0.46 | 0.01197  | 1.92207 | 0.60560149 | 0.482616462 | 0.123  |
| cg26703066 | II | 37 | 11 | 10813944                      | 0.42 | 0.02991  | 1.52413 | 0.53194883 | 0.409117197 | 0.123  |
| cg19323289 | II | 37 | 11 | 19463903 NAV2                 | 0.5  | 0.00432  | 2.36443 | 0.63332197 | 0.510590475 | 0.123  |
| cg25402137 | II | 37 | 11 | 67792744 ALDH3B1;ALDH3B1      | 0.5  | 0.00432  | 2.36443 | 0.3938273  | 0.27057815  | 0.123  |
| cg09868299 | II | 37 | 11 | 69259957                      | 0.54 | 0.0014   | 2.85345 | 0.44242419 | 0.565104221 | -0.123 |
| cg13802316 | I  | 37 | 11 | 70253460 CTTN;CTTN            | 0.5  | 0.00432  | 2.36443 | 0.77025158 | 0.893066097 | -0.123 |
| cg27154627 | II | 37 | 11 | 74398649                      | 0.58 | 0.00041  | 3.39184 | 0.74543702 | 0.8680073   | -0.123 |
| cg03102841 | II | 37 | 11 | 85646010                      | 0.46 | 0.01197  | 1.92207 | 0.57248946 | 0.695581942 | -0.123 |
| cg25354657 | II | 37 | 11 | 129991445 APLP2;APLP2;APLP2   | 0.54 | 0.0014   | 2.85345 | 0.63186864 | 0.508488184 | 0.123  |
| cg20460652 | II | 37 | 12 | 132936672                     | 0.46 | 0.01197  | 1.92207 | 0.43500627 | 0.311975572 | 0.123  |
| cg19107655 | I  | 37 | 13 | 112838528                     | 0.62 | 0.0001   | 3.98291 | 0.68100228 | 0.803725965 | -0.123 |
| cg04272613 | II | 37 | 14 | 59721173 DAAM1                | 0.54 | 0.0014   | 2.85345 | 0.84759972 | 0.725038135 | 0.123  |
| cg18490614 | I  | 37 | 15 | 27213362                      | 0.46 | 0.01197  | 1.92207 | 0.31532741 | 0.438621024 | -0.123 |
| cg19574915 | II | 37 | 15 | 89195555 ISG20                | 0.58 | 0.00041  | 3.39184 | 0.35840871 | 0.23492067  | 0.123  |
| cg02405193 | II | 37 | 16 | 3639839 BTBD12                | 0.5  | 0.00432  | 2.36443 | 0.31142403 | 0.434467911 | -0.123 |
| cg04945379 | II | 37 | 16 | 10970200 CIITA                | 0.54 | 0.0014   | 2.85345 | 0.59076387 | 0.46783477  | 0.123  |
| cg25341726 | II | 37 | 16 | 28518331 IL27                 | 0.46 | 0.01197  | 1.92207 | 0.37368994 | 0.496710356 | -0.123 |
| cg03099790 | II | 37 | 16 | 56456455 AMFR                 | 0.46 | 0.01197  | 1.92207 | 0.72751715 | 0.604319711 | 0.123  |
| cg01932823 | II | 37 | 16 | 57701726 GPR97                | 0.5  | 0.00432  | 2.36443 | 0.61324156 | 0.736154713 | -0.123 |
| cg09652746 | II | 37 | 16 | 67225437 E2F4;EXOC3L          | 0.54 | 0.0014   | 2.85345 | 0.79313539 | 0.669854388 | 0.123  |
| cg09685472 | II | 37 | 16 | 81527427 CMIP                 | 0.42 | 0.02991  | 1.52413 | 0.49535382 | 0.618035662 | -0.123 |

|            |    |    |    |                            |      |          |         |            |             |        |
|------------|----|----|----|----------------------------|------|----------|---------|------------|-------------|--------|
| cg16672810 | I  | 37 | 17 | 8815876 PIK3R5;PIK3R5      | 0.5  | 0.00432  | 2.36443 | 0.66327637 | 0.540183762 | 0.123  |
| cg16533363 | II | 37 | 17 | 17267288                   | 0.46 | 0.01197  | 1.92207 | 0.56705882 | 0.444449131 | 0.123  |
| cg15246895 | II | 37 | 17 | 17672475 RAI1              | 0.58 | 0.00041  | 3.39184 | 0.53310909 | 0.655892842 | -0.123 |
| cg13832201 | II | 37 | 17 | 19282521 MAPK7;MAPK7;MA    | 0.67 | 2.34E-05 | 4.63072 | 0.6446037  | 0.767867943 | -0.123 |
| cg04384031 | II | 37 | 17 | 19631485                   | 0.62 | 0.0001   | 3.98291 | 0.18344586 | 0.306405388 | -0.123 |
| cg05281206 | II | 37 | 17 | 32682770 CCL13             | 0.46 | 0.01197  | 1.92207 | 0.86433259 | 0.741597079 | 0.123  |
| cg26611328 | II | 37 | 17 | 38698893                   | 0.54 | 0.0014   | 2.85345 | 0.61821469 | 0.495291694 | 0.123  |
| cg21400896 | II | 37 | 17 | 47288569 ABI3;ABI3         | 0.58 | 0.00041  | 3.39184 | 0.65820852 | 0.535069172 | 0.123  |
| cg00041989 | II | 37 | 17 | 55828038                   | 0.54 | 0.0014   | 2.85345 | 0.37663639 | 0.499931872 | -0.123 |
| cg24136318 | I  | 37 | 17 | 75454130 SEPT9;SEPT9;SEPT9 | 0.75 | 7.61E-07 | 6.11857 | 0.40812333 | 0.285242596 | 0.123  |
| cg17906851 | I  | 37 | 17 | 78935070 RPTOR;RPTOR       | 0.46 | 0.01197  | 1.92207 | 0.93878161 | 0.81589677  | 0.123  |
| cg26766064 | II | 37 | 17 | 79099711 MIR657;AATK;MIR6  | 0.42 | 0.02991  | 1.52413 | 0.74581174 | 0.62252538  | 0.123  |
| cg11326429 | I  | 37 | 17 | 79827632 ARHGDI1A          | 0.58 | 0.00041  | 3.39184 | 0.64335866 | 0.520451978 | 0.123  |
| cg23267759 | I  | 37 | 18 | 19751335 GATA6             | 0.46 | 0.01197  | 1.92207 | 0.11681911 | 0.240148682 | -0.123 |
| cg04603976 | II | 37 | 19 | 4052706 ZBTB7A             | 0.62 | 0.0001   | 3.98291 | 0.29785262 | 0.420973538 | -0.123 |
| cg12110801 | II | 37 | 19 | 5992284                    | 0.54 | 0.0014   | 2.85345 | 0.45856702 | 0.581700683 | -0.123 |
| cg01618851 | II | 37 | 19 | 7812265 CD209;CD209;CD20   | 0.5  | 0.00432  | 2.36443 | 0.44016641 | 0.562966394 | -0.123 |
| cg12102973 | II | 37 | 19 | 13320368 CACNA1A;CACNA1A   | 0.42 | 0.02991  | 1.52413 | 0.67498385 | 0.551516906 | 0.123  |
| cg01644611 | I  | 37 | 20 | 3052253 OXT                | 0.5  | 0.00432  | 2.36443 | 0.72117282 | 0.843828293 | -0.123 |
| cg08587504 | II | 37 | 20 | 34639686 LOC647979         | 0.71 | 4.57E-06 | 5.34042 | 0.66650481 | 0.789511838 | -0.123 |
| cg21108851 | II | 37 | 21 | 43255700 PRDM15;PRDM15     | 0.58 | 0.00041  | 3.39184 | 0.89132147 | 0.768501949 | 0.123  |
| cg02074274 | II | 37 | 21 | 45178331 PDXK              | 0.58 | 0.00041  | 3.39184 | 0.71784828 | 0.840919994 | -0.123 |
| cg01267908 | II | 37 | 21 | 46686908 POFUT2;POFUT2;P   | 0.42 | 0.02991  | 1.52413 | 0.58043352 | 0.457714909 | 0.123  |
| cg17016101 | II | 37 | 1  | 1907127 KIAA1751           | 0.58 | 0.00041  | 3.39184 | 0.71971692 | 0.842054065 | -0.122 |
| cg16585946 | II | 37 | 1  | 6831719                    | 0.42 | 0.02991  | 1.52413 | 0.60200239 | 0.479727082 | 0.122  |
| cg25978327 | II | 37 | 1  | 8065039                    | 0.58 | 0.00041  | 3.39184 | 0.77987587 | 0.902326042 | -0.122 |
| cg19743168 | II | 37 | 1  | 23544995                   | 0.46 | 0.01197  | 1.92207 | 0.23456962 | 0.356722365 | -0.122 |
| cg15712177 | I  | 37 | 1  | 25236296 RUNX3;RUNX3       | 0.58 | 0.00041  | 3.39184 | 0.80174507 | 0.923527352 | -0.122 |
| cg17973115 | II | 37 | 1  | 25333445                   | 0.42 | 0.02991  | 1.52413 | 0.20603777 | 0.327954918 | -0.122 |
| cg25203916 | II | 37 | 1  | 26392876 TRIM63            | 0.5  | 0.00432  | 2.36443 | 0.63750956 | 0.515492392 | 0.122  |
| cg26328951 | II | 37 | 1  | 28906514 SNHG12;SNORD99;   | 0.46 | 0.01197  | 1.92207 | 0.78384732 | 0.66164951  | 0.122  |
| cg16349331 | II | 37 | 1  | 32782341 HDAC1             | 0.46 | 0.01197  | 1.92207 | 0.69594802 | 0.573561697 | 0.122  |
| cg05798664 | II | 37 | 1  | 36825645 STK40             | 0.46 | 0.01197  | 1.92207 | 0.53309115 | 0.411193075 | 0.122  |

|            |    |    |   |           |                    |      |          |         |            |             |        |
|------------|----|----|---|-----------|--------------------|------|----------|---------|------------|-------------|--------|
| cg12746947 | II | 37 | 1 | 38227094  | EPHA10;EPHA10      | 0.5  | 0.00432  | 2.36443 | 0.59536521 | 0.717227079 | -0.122 |
| cg26038582 | I  | 37 | 1 | 42384390  | HIVEP3;HIVEP3;HIV  | 0.42 | 0.02991  | 1.52413 | 0.41621002 | 0.538639256 | -0.122 |
| cg14849855 | II | 37 | 1 | 67807960  | IL12RB2            | 0.46 | 0.01197  | 1.92207 | 0.77284384 | 0.651258989 | 0.122  |
| cg21859421 | II | 37 | 1 | 150969592 | FAM63A;FAM63A;F    | 0.46 | 0.01197  | 1.92207 | 0.80720796 | 0.685488071 | 0.122  |
| cg16564156 | II | 37 | 1 | 200859871 | C1orf106           | 0.5  | 0.00432  | 2.36443 | 0.4698537  | 0.591750047 | -0.122 |
| cg00921097 | II | 37 | 1 | 202090980 | GPR37L1            | 0.42 | 0.02991  | 1.52413 | 0.60119719 | 0.479065865 | 0.122  |
| cg04830316 | II | 37 | 1 | 203465361 | OPTC               | 0.46 | 0.01197  | 1.92207 | 0.59177838 | 0.469371419 | 0.122  |
| cg01328473 | II | 37 | 2 | 1711966   | PXDN               | 0.46 | 0.01197  | 1.92207 | 0.53224586 | 0.653852449 | -0.122 |
| cg13286582 | I  | 37 | 2 | 37883934  | CDC42EP3           | 0.46 | 0.01197  | 1.92207 | 0.56211762 | 0.440431539 | 0.122  |
| cg08449164 | II | 37 | 2 | 54784402  | SPTBN1;SPTBN1      | 0.5  | 0.00432  | 2.36443 | 0.66086513 | 0.538957514 | 0.122  |
| cg05403316 | II | 37 | 2 | 55339939  |                    | 0.42 | 0.02991  | 1.52413 | 0.18989764 | 0.312063963 | -0.122 |
| cg14900246 | I  | 37 | 2 | 112655153 | MERTK              | 0.42 | 0.02991  | 1.52413 | 0.59215499 | 0.713690217 | -0.122 |
| cg24980995 | II | 37 | 2 | 218219798 | DIRC3              | 0.5  | 0.00432  | 2.36443 | 0.76421097 | 0.642430492 | 0.122  |
| cg22286764 | II | 37 | 3 | 37428639  |                    | 0.42 | 0.02991  | 1.52413 | 0.76774861 | 0.889686838 | -0.122 |
| cg02083676 | II | 37 | 3 | 127311156 |                    | 0.46 | 0.01197  | 1.92207 | 0.63185531 | 0.754197504 | -0.122 |
| cg16098726 | II | 37 | 3 | 128778738 | GP9                | 0.46 | 0.01197  | 1.92207 | 0.59754556 | 0.475249035 | 0.122  |
| cg14051544 | I  | 37 | 3 | 170303286 | SLC7A14            | 0.58 | 0.00041  | 3.39184 | 0.10259024 | 0.224336663 | -0.122 |
| cg08822118 | II | 37 | 3 | 184037481 | EIF4G1;EIF4G1;EIF4 | 0.58 | 0.00041  | 3.39184 | 0.62808782 | 0.750285923 | -0.122 |
| cg14180696 | II | 37 | 3 | 194089473 | LRRC15;LRRC15      | 0.54 | 0.0014   | 2.85345 | 0.4308721  | 0.308612706 | 0.122  |
| cg00150882 | II | 37 | 4 | 171011502 | AADAT;AADAT        | 0.54 | 0.0014   | 2.85345 | 0.17646848 | 0.298240787 | -0.122 |
| cg18334345 | II | 37 | 4 | 184462457 |                    | 0.62 | 0.0001   | 3.98291 | 0.83821804 | 0.716319266 | 0.122  |
| cg24839529 | II | 37 | 4 | 185668393 |                    | 0.46 | 0.01197  | 1.92207 | 0.53986942 | 0.662131044 | -0.122 |
| cg20682639 | II | 37 | 5 | 31799285  | PDZD2;PDZD2        | 0.5  | 0.00432  | 2.36443 | 0.58920178 | 0.467401177 | 0.122  |
| cg17645677 | II | 37 | 5 | 149185704 | PPARGC1B           | 0.46 | 0.01197  | 1.92207 | 0.46333661 | 0.585461403 | -0.122 |
| cg16958939 | I  | 37 | 6 | 7225223   | RREB1;RREB1;RREB   | 0.58 | 0.00041  | 3.39184 | 0.31037978 | 0.432507717 | -0.122 |
| cg22146593 | II | 37 | 6 | 24919003  |                    | 0.42 | 0.02991  | 1.52413 | 0.63315863 | 0.510727629 | 0.122  |
| cg10199913 | I  | 37 | 6 | 26045987  | HIST1H3C           | 0.83 | 1.21E-08 | 7.91837 | 0.33807406 | 0.21613835  | 0.122  |
| cg21366673 | II | 37 | 6 | 30459512  | HLA-E              | 0.46 | 0.01197  | 1.92207 | 0.6867955  | 0.56484291  | 0.122  |
| cg18020072 | II | 37 | 6 | 31590640  | SNORA38;BAT2       | 0.5  | 0.00432  | 2.36443 | 0.68281755 | 0.804496619 | -0.122 |
| cg12484688 | II | 37 | 6 | 31868021  | ZBTB12             | 0.46 | 0.01197  | 1.92207 | 0.30840729 | 0.430565466 | -0.122 |
| cg25426302 | II | 37 | 6 | 32120826  | PPT2;PRRT1;PPT2    | 0.42 | 0.02991  | 1.52413 | 0.85056071 | 0.72883296  | 0.122  |
| cg23598378 | II | 37 | 6 | 42072986  | C6orf132           | 0.46 | 0.01197  | 1.92207 | 0.71257013 | 0.834753833 | -0.122 |
| cg06068369 | II | 37 | 6 | 105837504 | PREP               | 0.5  | 0.00432  | 2.36443 | 0.7682813  | 0.890655259 | -0.122 |

|            |    |    |    |           |                   |      |         |         |            |             |        |
|------------|----|----|----|-----------|-------------------|------|---------|---------|------------|-------------|--------|
| cg11387340 | II | 37 | 6  | 166970727 | RPS6KA2;RPS6KA2   | 0.5  | 0.00432 | 2.36443 | 0.26129854 | 0.383555356 | -0.122 |
| cg05877104 | I  | 37 | 6  | 167507447 |                   | 0.58 | 0.00041 | 3.39184 | 0.5419364  | 0.420334838 | 0.122  |
| cg27638126 | II | 37 | 7  | 15725322  | MEOX2             | 0.54 | 0.0014  | 2.85345 | 0.09532312 | 0.21754896  | -0.122 |
| cg07537562 | II | 37 | 7  | 51539514  |                   | 0.42 | 0.02991 | 1.52413 | 0.3225106  | 0.444773827 | -0.122 |
| cg20274462 | II | 37 | 8  | 95980625  |                   | 0.62 | 0.0001  | 3.98291 | 0.25375196 | 0.375786777 | -0.122 |
| cg14752089 | II | 37 | 8  | 128773042 |                   | 0.46 | 0.01197 | 1.92207 | 0.32033329 | 0.442641393 | -0.122 |
| cg00521239 | II | 37 | 8  | 145015964 | PLEC1;PLEC1;PLEC1 | 0.46 | 0.01197 | 1.92207 | 0.25964527 | 0.137522188 | 0.122  |
| cg10769767 | II | 37 | 9  | 37024153  | PAX5              | 0.54 | 0.0014  | 2.85345 | 0.54607631 | 0.42401247  | 0.122  |
| cg14018735 | II | 37 | 9  | 136270734 | C9orf96           | 0.58 | 0.00041 | 3.39184 | 0.49665138 | 0.619141638 | -0.122 |
| cg06902558 | I  | 37 | 10 | 3141803   | PFKP              | 0.58 | 0.00041 | 3.39184 | 0.78699798 | 0.908891256 | -0.122 |
| cg25907132 | I  | 37 | 10 | 51489510  |                   | 0.42 | 0.02991 | 1.52413 | 0.08291736 | 0.204636194 | -0.122 |
| cg00661347 | II | 37 | 10 | 71661228  | COL13A1;COL13A1;  | 0.5  | 0.00432 | 2.36443 | 0.58591213 | 0.464215981 | 0.122  |
| cg26679004 | I  | 37 | 10 | 88023135  | GRID1             | 0.46 | 0.01197 | 1.92207 | 0.22740395 | 0.349216369 | -0.122 |
| cg00547480 | II | 37 | 10 | 103875961 | LDB1;LDB1         | 0.46 | 0.01197 | 1.92207 | 0.53364929 | 0.656071423 | -0.122 |
| cg26969179 | II | 37 | 10 | 127738328 | ADAM12;ADAM12     | 0.58 | 0.00041 | 3.39184 | 0.31063853 | 0.432314987 | -0.122 |
| cg06603309 | I  | 37 | 11 | 2724144   | KCNQ1;KCNQ1       | 0.54 | 0.0014  | 2.85345 | 0.65342491 | 0.531790638 | 0.122  |
| cg20897479 | II | 37 | 11 | 12292577  |                   | 0.5  | 0.00432 | 2.36443 | 0.68769438 | 0.566071309 | 0.122  |
| cg14742715 | II | 37 | 11 | 18286807  | SAA1;SAA1         | 0.54 | 0.0014  | 2.85345 | 0.15101504 | 0.273332253 | -0.122 |
| cg09878888 | II | 37 | 11 | 57529614  | CTNND1;CTNND1;C   | 0.46 | 0.01197 | 1.92207 | 0.10845433 | 0.230920943 | -0.122 |
| cg07298431 | II | 37 | 11 | 129817649 | PRDM10;PRDM10;I   | 0.58 | 0.00041 | 3.39184 | 0.48814403 | 0.366099115 | 0.122  |
| cg07925587 | II | 37 | 12 | 52583324  | KRT80;KRT80       | 0.46 | 0.01197 | 1.92207 | 0.16432422 | 0.286658924 | -0.122 |
| cg14212748 | II | 37 | 12 | 53343703  | KRT18;KRT18       | 0.54 | 0.0014  | 2.85345 | 0.50767336 | 0.630057325 | -0.122 |
| cg22630748 | II | 37 | 12 | 57848870  | INHBE             | 0.54 | 0.0014  | 2.85345 | 0.61843794 | 0.740501174 | -0.122 |
| cg08514385 | II | 37 | 13 | 32596585  |                   | 0.54 | 0.0014  | 2.85345 | 0.73742091 | 0.859843657 | -0.122 |
| cg09469566 | I  | 37 | 13 | 112717244 |                   | 0.42 | 0.02991 | 1.52413 | 0.1839336  | 0.3054416   | -0.122 |
| cg02318784 | II | 37 | 15 | 27213174  |                   | 0.46 | 0.01197 | 1.92207 | 0.29562943 | 0.417773983 | -0.122 |
| cg07097876 | II | 37 | 15 | 71409997  |                   | 0.46 | 0.01197 | 1.92207 | 0.63781648 | 0.515651175 | 0.122  |
| cg10850792 | II | 37 | 15 | 89531046  |                   | 0.42 | 0.02991 | 1.52413 | 0.57832511 | 0.69984369  | -0.122 |
| cg06219695 | II | 37 | 16 | 434256    | LOC100134368      | 0.58 | 0.00041 | 3.39184 | 0.29915589 | 0.421653925 | -0.122 |
| cg27190398 | I  | 37 | 16 | 731844    | STUB1;JMJD8       | 0.5  | 0.00432 | 2.36443 | 0.60831955 | 0.729936464 | -0.122 |
| cg02485642 | I  | 37 | 16 | 832958    | MSLNL             | 0.46 | 0.01197 | 1.92207 | 0.85468681 | 0.732876387 | 0.122  |
| cg26598348 | II | 37 | 16 | 875626    |                   | 0.5  | 0.00432 | 2.36443 | 0.59869715 | 0.476296014 | 0.122  |
| cg09234161 | II | 37 | 16 | 57565147  | CCDC102A          | 0.46 | 0.01197 | 1.92207 | 0.32502341 | 0.447051124 | -0.122 |

|            |    |    |    |           |                  |      |         |         |            |             |        |
|------------|----|----|----|-----------|------------------|------|---------|---------|------------|-------------|--------|
| cg04851702 | II | 37 | 16 | 81528974  | CMIP;CMIP;CMIP   | 0.54 | 0.0014  | 2.85345 | 0.25253496 | 0.37491963  | -0.122 |
| cg26655856 | II | 37 | 16 | 88977887  | CBFA2T3;CBFA2T3  | 0.58 | 0.00041 | 3.39184 | 0.51885391 | 0.396880536 | 0.122  |
| cg19504184 | II | 37 | 17 | 1170806   |                  | 0.58 | 0.00041 | 3.39184 | 0.21872209 | 0.341205328 | -0.122 |
| cg23403980 | II | 37 | 17 | 2060623   | SMG6;SMG6        | 0.54 | 0.0014  | 2.85345 | 0.32686393 | 0.448512717 | -0.122 |
| cg17579446 | II | 37 | 17 | 7217367   | GPS2             | 0.46 | 0.01197 | 1.92207 | 0.68376813 | 0.561387743 | 0.122  |
| cg04118102 | II | 37 | 17 | 15824118  |                  | 0.58 | 0.00041 | 3.39184 | 0.780149   | 0.901819554 | -0.122 |
| cg13274938 | II | 37 | 17 | 38493822  | RARA;RARA;RARA   | 0.54 | 0.0014  | 2.85345 | 0.67749733 | 0.799628132 | -0.122 |
| cg08783253 | II | 37 | 17 | 40996565  | AOC2;AOC2        | 0.54 | 0.0014  | 2.85345 | 0.62832297 | 0.750095943 | -0.122 |
| cg16861241 | I  | 37 | 17 | 74138396  | FOXJ1            | 0.58 | 0.00041 | 3.39184 | 0.57465393 | 0.696954705 | -0.122 |
| cg14210726 | II | 37 | 17 | 76136952  | TMC8             | 0.46 | 0.01197 | 1.92207 | 0.52916934 | 0.651543313 | -0.122 |
| cg03249047 | II | 37 | 17 | 80872472  | TBCD             | 0.42 | 0.02991 | 1.52413 | 0.57881308 | 0.456703022 | 0.122  |
| cg10904070 | II | 37 | 18 | 3012017   | LPIN2            | 0.5  | 0.00432 | 2.36443 | 0.67574273 | 0.798220815 | -0.122 |
| cg12230709 | I  | 37 | 19 | 840873    | PRTN3            | 0.5  | 0.00432 | 2.36443 | 0.2758351  | 0.397485952 | -0.122 |
| cg08700306 | II | 37 | 19 | 33686390  | LRP3             | 0.58 | 0.00041 | 3.39184 | 0.38625782 | 0.507930521 | -0.122 |
| cg03301498 | II | 37 | 19 | 39889222  | MED29            | 0.5  | 0.00432 | 2.36443 | 0.28601989 | 0.407888885 | -0.122 |
| cg24446326 | II | 37 | 20 | 19952018  | RIN2             | 0.62 | 0.0001  | 3.98291 | 0.71773343 | 0.839694627 | -0.122 |
| cg15133734 | II | 37 | 20 | 48728113  | UBE2V1;UBE2V1;UI | 0.5  | 0.00432 | 2.36443 | 0.46846144 | 0.346602309 | 0.122  |
| cg08480461 | II | 37 | 1  | 39553001  | MACF1            | 0.62 | 0.0001  | 3.98291 | 0.33746145 | 0.458222033 | -0.121 |
| cg20168837 | II | 37 | 1  | 54562213  | C1orf83          | 0.42 | 0.02991 | 1.52413 | 0.47835694 | 0.598872542 | -0.121 |
| cg02573357 | II | 37 | 1  | 203738799 | LAX1;LAX1        | 0.42 | 0.02991 | 1.52413 | 0.26304041 | 0.384055567 | -0.121 |
| cg04323713 | II | 37 | 1  | 212738603 | ATF3             | 0.46 | 0.01197 | 1.92207 | 0.85431714 | 0.733265109 | 0.121  |
| cg11847933 | II | 37 | 1  | 227130394 | CABC1            | 0.42 | 0.02991 | 1.52413 | 0.67600931 | 0.797043151 | -0.121 |
| cg24312489 | II | 37 | 1  | 228109169 | WNT9A            | 0.54 | 0.0014  | 2.85345 | 0.60876634 | 0.488163396 | 0.121  |
| cg24756642 | II | 37 | 2  | 1597123   |                  | 0.5  | 0.00432 | 2.36443 | 0.7633348  | 0.642214544 | 0.121  |
| cg24837370 | II | 37 | 2  | 5833774   | SOX11            | 0.5  | 0.00432 | 2.36443 | 0.15201066 | 0.272895282 | -0.121 |
| cg05627557 | II | 37 | 2  | 37418009  |                  | 0.5  | 0.00432 | 2.36443 | 0.68300897 | 0.804077708 | -0.121 |
| cg19220272 | II | 37 | 2  | 43312367  |                  | 0.54 | 0.0014  | 2.85345 | 0.2190702  | 0.340116228 | -0.121 |
| cg17803713 | II | 37 | 2  | 109873891 | SH3RF3           | 0.54 | 0.0014  | 2.85345 | 0.54055408 | 0.661770096 | -0.121 |
| cg01750780 | I  | 37 | 2  | 131451266 |                  | 0.42 | 0.02991 | 1.52413 | 0.36265143 | 0.241747969 | 0.121  |
| cg09287629 | II | 37 | 2  | 203036208 |                  | 0.46 | 0.01197 | 1.92207 | 0.1803164  | 0.30161744  | -0.121 |
| cg11886884 | II | 37 | 3  | 138062860 |                  | 0.42 | 0.02991 | 1.52413 | 0.69932726 | 0.577916398 | 0.121  |
| cg18623216 | II | 37 | 3  | 155421970 | PLCH1;PLCH1      | 0.5  | 0.00432 | 2.36443 | 0.14613094 | 0.267376304 | -0.121 |
| cg08704934 | I  | 37 | 3  | 194826585 | C3orf21          | 0.46 | 0.01197 | 1.92207 | 0.78314573 | 0.903998366 | -0.121 |

|            |    |    |    |                             |      |          |         |            |             |        |
|------------|----|----|----|-----------------------------|------|----------|---------|------------|-------------|--------|
| cg09225701 | II | 37 | 4  | 8248877                     | 0.67 | 2.34E-05 | 4.63072 | 0.75549959 | 0.876619146 | -0.121 |
| cg00876141 | II | 37 | 4  | 47837775 CORIN              | 0.54 | 0.0014   | 2.85345 | 0.32930254 | 0.449847114 | -0.121 |
| cg07671752 | II | 37 | 5  | 176734858 MXD3;MXD3         | 0.58 | 0.00041  | 3.39184 | 0.55002988 | 0.671289348 | -0.121 |
| cg25550425 | II | 37 | 5  | 178645682 ADAMTS2;ADAMTS    | 0.5  | 0.00432  | 2.36443 | 0.82826288 | 0.707248264 | 0.121  |
| cg03680932 | I  | 37 | 6  | 16306683 ATXN1;ATXN1        | 0.54 | 0.0014   | 2.85345 | 0.90288288 | 0.781765091 | 0.121  |
| cg23565821 | II | 37 | 6  | 33385056 CUTA;CUTA;CUTA;C   | 0.46 | 0.01197  | 1.92207 | 0.31987245 | 0.440789679 | -0.121 |
| cg20201675 | II | 37 | 6  | 112230657                   | 0.5  | 0.00432  | 2.36443 | 0.68650529 | 0.8074834   | -0.121 |
| cg25291978 | II | 37 | 6  | 144386422 PLAGL1;PLAGL1     | 0.5  | 0.00432  | 2.36443 | 0.80178032 | 0.680689599 | 0.121  |
| cg01851450 | II | 37 | 6  | 146864335 RAB32             | 0.54 | 0.0014   | 2.85345 | 0.10180818 | 0.222662459 | -0.121 |
| cg23560388 | II | 37 | 6  | 155542639 TIAM2;TIAM2       | 0.54 | 0.0014   | 2.85345 | 0.77642563 | 0.897173623 | -0.121 |
| cg09462806 | II | 37 | 7  | 150084                      | 0.58 | 0.00041  | 3.39184 | 0.16825507 | 0.289350902 | -0.121 |
| cg02123534 | II | 37 | 7  | 965485 ADAP1                | 0.5  | 0.00432  | 2.36443 | 0.37980892 | 0.500521061 | -0.121 |
| cg23093589 | II | 37 | 7  | 20824932 SP8;SP8            | 0.42 | 0.02991  | 1.52413 | 0.14412072 | 0.265559231 | -0.121 |
| cg10421188 | I  | 37 | 7  | 28824953 CREB5;CREB5;CREB   | 0.46 | 0.01197  | 1.92207 | 0.78554695 | 0.90665247  | -0.121 |
| cg18429196 | II | 37 | 7  | 73609326 EIF4H;EIF4H        | 0.62 | 0.0001   | 3.98291 | 0.66340087 | 0.784493772 | -0.121 |
| cg17115737 | II | 37 | 7  | 75580813 POR                | 0.58 | 0.00041  | 3.39184 | 0.75714599 | 0.878623937 | -0.121 |
| cg21298978 | II | 37 | 8  | 143961391 CYP11B1;CYP11B1   | 0.42 | 0.02991  | 1.52413 | 0.7331018  | 0.612059748 | 0.121  |
| cg02679745 | II | 37 | 9  | 139927646 C9orf139;FUT7     | 0.54 | 0.0014   | 2.85345 | 0.25882645 | 0.380076125 | -0.121 |
| cg13871921 | I  | 37 | 9  | 140076357 ANAPC2            | 0.58 | 0.00041  | 3.39184 | 0.83370986 | 0.954765078 | -0.121 |
| cg13741304 | II | 37 | 9  | 140501305 ARDC1             | 0.46 | 0.01197  | 1.92207 | 0.58360145 | 0.704575191 | -0.121 |
| cg17460183 | II | 37 | 10 | 48370158 ZNF488             | 0.46 | 0.01197  | 1.92207 | 0.68608888 | 0.564680275 | 0.121  |
| cg06219732 | II | 37 | 10 | 72118317 LRRC20;LRRC20;LR   | 0.46 | 0.01197  | 1.92207 | 0.69712824 | 0.5756595   | 0.121  |
| cg13740185 | I  | 37 | 10 | 73486801 C10orf105;CDH23    | 0.83 | 1.21E-08 | 7.91837 | 0.43972697 | 0.31860041  | 0.121  |
| cg03110921 | II | 37 | 10 | 79597461 DLG5               | 0.42 | 0.02991  | 1.52413 | 0.7299466  | 0.609420879 | 0.121  |
| cg25104397 | II | 37 | 10 | 104535920 C10orf26;C10orf26 | 0.5  | 0.00432  | 2.36443 | 0.30296027 | 0.424053963 | -0.121 |
| cg24644436 | I  | 37 | 10 | 135202906 PAOX;PAOX;PAOX    | 0.5  | 0.00432  | 2.36443 | 0.27944761 | 0.158709346 | 0.121  |
| cg27072025 | II | 37 | 10 | 135203200 PAOX;PAOX;PAOX    | 0.5  | 0.00432  | 2.36443 | 0.4105605  | 0.289388629 | 0.121  |
| cg17990365 | II | 37 | 11 | 319718 IFITM3               | 0.62 | 0.0001   | 3.98291 | 0.56749124 | 0.688722486 | -0.121 |
| cg07824422 | II | 37 | 11 | 2555406 KCNQ1;KCNQ1         | 0.5  | 0.00432  | 2.36443 | 0.34060989 | 0.461782015 | -0.121 |
| cg22961513 | II | 37 | 11 | 14280813 SPON1              | 0.5  | 0.00432  | 2.36443 | 0.47763434 | 0.598253194 | -0.121 |
| cg13255398 | II | 37 | 11 | 16836827 PLEKHA7            | 0.54 | 0.0014   | 2.85345 | 0.22398321 | 0.344637903 | -0.121 |
| cg27395922 | I  | 37 | 11 | 50257633 LOC441601          | 0.5  | 0.00432  | 2.36443 | 0.64286804 | 0.764182166 | -0.121 |
| cg20179907 | II | 37 | 11 | 72336908 PDE2A;PDE2A;PDE2   | 0.54 | 0.0014   | 2.85345 | 0.45217576 | 0.573457299 | -0.121 |

|            |    |    |    |           |                      |      |         |         |            |             |        |
|------------|----|----|----|-----------|----------------------|------|---------|---------|------------|-------------|--------|
| cg09799980 | II | 37 | 12 | 4398618   | CCND2                | 0.58 | 0.00041 | 3.39184 | 0.24382435 | 0.364987117 | -0.121 |
| cg19942083 | I  | 37 | 12 | 7070562   |                      | 0.5  | 0.00432 | 2.36443 | 0.18937577 | 0.068713193 | 0.121  |
| cg07855572 | II | 37 | 12 | 55028956  | LACRT                | 0.58 | 0.00041 | 3.39184 | 0.7392028  | 0.618150214 | 0.121  |
| cg12564437 | II | 37 | 12 | 96464899  |                      | 0.42 | 0.02991 | 1.52413 | 0.52115979 | 0.400230812 | 0.121  |
| cg20884605 | II | 37 | 12 | 112205368 | ALDH2                | 0.42 | 0.02991 | 1.52413 | 0.22598909 | 0.346940257 | -0.121 |
| cg08658787 | I  | 37 | 12 | 113916646 |                      | 0.5  | 0.00432 | 2.36443 | 0.52710269 | 0.64820449  | -0.121 |
| cg05957567 | I  | 37 | 12 | 122467228 | BCL7A;BCL7A          | 0.54 | 0.0014  | 2.85345 | 0.66076032 | 0.540110636 | 0.121  |
| cg09719269 | II | 37 | 12 | 125033803 |                      | 0.54 | 0.0014  | 2.85345 | 0.63600484 | 0.756518906 | -0.121 |
| cg17582615 | II | 37 | 13 | 44986657  |                      | 0.54 | 0.0014  | 2.85345 | 0.66921295 | 0.789989719 | -0.121 |
| cg16238149 | II | 37 | 13 | 111173329 |                      | 0.46 | 0.01197 | 1.92207 | 0.20123307 | 0.322525541 | -0.121 |
| cg16312609 | II | 37 | 14 | 65801447  |                      | 0.42 | 0.02991 | 1.52413 | 0.75179926 | 0.630458725 | 0.121  |
| cg04977856 | II | 37 | 14 | 89886941  | FOXN3                | 0.5  | 0.00432 | 2.36443 | 0.77163141 | 0.892171696 | -0.121 |
| cg14019523 | II | 37 | 14 | 94407033  | ASB2                 | 0.54 | 0.0014  | 2.85345 | 0.66054331 | 0.781918094 | -0.121 |
| cg04179148 | II | 37 | 14 | 94858339  | SERPINA1;SERPINA1    | 0.62 | 0.0001  | 3.98291 | 0.6131709  | 0.734482436 | -0.121 |
| cg23592421 | II | 37 | 14 | 105147461 |                      | 0.42 | 0.02991 | 1.52413 | 0.29738648 | 0.418790209 | -0.121 |
| cg24971846 | I  | 37 | 14 | 105618576 | JAG2;JAG2            | 0.46 | 0.01197 | 1.92207 | 0.7764018  | 0.655680618 | 0.121  |
| cg18545991 | II | 37 | 15 | 45740677  |                      | 0.46 | 0.01197 | 1.92207 | 0.75580799 | 0.877144419 | -0.121 |
| cg01380884 | II | 37 | 15 | 74923934  | EDC3;EDC3;EDC3       | 0.58 | 0.00041 | 3.39184 | 0.67297686 | 0.793758725 | -0.121 |
| cg17846127 | II | 37 | 15 | 89940505  | LOC254559            | 0.46 | 0.01197 | 1.92207 | 0.67480481 | 0.796151377 | -0.121 |
| cg08438529 | I  | 37 | 16 | 1052939   |                      | 0.62 | 0.0001  | 3.98291 | 0.62385048 | 0.503070321 | 0.121  |
| cg01489441 | I  | 37 | 16 | 1764111   | MAPK8IP3;MAPK8IP3    | 0.54 | 0.0014  | 2.85345 | 0.37345382 | 0.252257427 | 0.121  |
| cg12031863 | II | 37 | 16 | 4587854   | C16orf5              | 0.62 | 0.0001  | 3.98291 | 0.31106443 | 0.432503725 | -0.121 |
| cg05846851 | II | 37 | 16 | 10172054  | GRIN2A;GRIN2A;GRIN2A | 0.5  | 0.00432 | 2.36443 | 0.73836831 | 0.617482783 | 0.121  |
| cg09109383 | II | 37 | 16 | 16083164  | ABCC1;ABCC1;ABCC1    | 0.54 | 0.0014  | 2.85345 | 0.58794482 | 0.708733081 | -0.121 |
| cg01025883 | II | 37 | 16 | 23867088  | PRKCB;PRKCB          | 0.5  | 0.00432 | 2.36443 | 0.67792293 | 0.798511683 | -0.121 |
| cg26864036 | I  | 37 | 16 | 83974716  |                      | 0.54 | 0.0014  | 2.85345 | 0.76044324 | 0.639075062 | 0.121  |
| cg06652210 | II | 37 | 17 | 1944594   | OVCA2;DPH1           | 0.58 | 0.00041 | 3.39184 | 0.63816    | 0.759500899 | -0.121 |
| cg10193804 | II | 37 | 17 | 16876525  | TNFRSF13B            | 0.42 | 0.02991 | 1.52413 | 0.43859926 | 0.317892963 | 0.121  |
| cg18410271 | II | 37 | 17 | 43472435  | ARHGAP27;ARHGAP27    | 0.54 | 0.0014  | 2.85345 | 0.41964432 | 0.540546847 | -0.121 |
| cg05363382 | II | 37 | 17 | 45767653  |                      | 0.5  | 0.00432 | 2.36443 | 0.7706324  | 0.649553702 | 0.121  |
| cg22632947 | II | 37 | 17 | 64787784  | PRKCA                | 0.46 | 0.01197 | 1.92207 | 0.388116   | 0.267318145 | 0.121  |
| cg11158979 | I  | 37 | 17 | 80557661  | FOXK2                | 0.46 | 0.01197 | 1.92207 | 0.85437851 | 0.733779421 | 0.121  |
| cg01859460 | II | 37 | 19 | 2273050   | OAZ1                 | 0.46 | 0.01197 | 1.92207 | 0.68538241 | 0.564871212 | 0.121  |

|            |    |    |    |           |                   |      |          |         |            |             |        |
|------------|----|----|----|-----------|-------------------|------|----------|---------|------------|-------------|--------|
| cg22898082 | II | 37 | 19 | 11074428  | SMARCA4;SMARCA    | 0.67 | 2.34E-05 | 4.63072 | 0.55854579 | 0.43746521  | 0.121  |
| cg22617898 | I  | 37 | 19 | 18313388  | RAB3A             | 0.67 | 2.34E-05 | 4.63072 | 0.735007   | 0.856498468 | -0.121 |
| cg27285056 | II | 37 | 19 | 50868879  | NAPSA;NAPSA       | 0.42 | 0.02991  | 1.52413 | 0.74920835 | 0.628290425 | 0.121  |
| cg16190478 | II | 37 | 21 | 45789122  | TRPM2             | 0.58 | 0.00041  | 3.39184 | 0.51277463 | 0.634075345 | -0.121 |
| cg14112356 | II | 37 | 21 | 46348443  | ITGB2             | 0.5  | 0.00432  | 2.36443 | 0.57050892 | 0.449594428 | 0.121  |
| cg26666978 | II | 37 | 21 | 47038531  |                   | 0.5  | 0.00432  | 2.36443 | 0.25599044 | 0.377455434 | -0.121 |
| cg27200006 | II | 37 | 22 | 25003854  | GGT1;GGT1;GGT1;(  | 0.5  | 0.00432  | 2.36443 | 0.28071423 | 0.401291646 | -0.121 |
| cg11837181 | I  | 37 | 1  | 3001002   | PRDM16;PRDM16     | 0.58 | 0.00041  | 3.39184 | 0.71724219 | 0.597031175 | 0.12   |
| cg15059176 | II | 37 | 1  | 3306447   | PRDM16;PRDM16     | 0.42 | 0.02991  | 1.52413 | 0.74021676 | 0.620535876 | 0.12   |
| cg11186344 | I  | 37 | 1  | 19253694  | IFFO2             | 0.67 | 2.34E-05 | 4.63072 | 0.4036387  | 0.283698392 | 0.12   |
| cg20777437 | II | 37 | 1  | 54619703  | CDCP2             | 0.67 | 2.34E-05 | 4.63072 | 0.66749991 | 0.787757004 | -0.12  |
| cg13369817 | II | 37 | 1  | 55116866  | C1orf175;C1orf175 | 0.54 | 0.0014   | 2.85345 | 0.79728979 | 0.677752641 | 0.12   |
| cg24429974 | I  | 37 | 1  | 161195180 | TOMM40L           | 0.54 | 0.0014   | 2.85345 | 0.72866391 | 0.848577483 | -0.12  |
| cg17814814 | II | 37 | 1  | 222060676 |                   | 0.54 | 0.0014   | 2.85345 | 0.69252036 | 0.812871552 | -0.12  |
| cg26614229 | II | 37 | 1  | 231156204 | MIR1182;FAM89A    | 0.46 | 0.01197  | 1.92207 | 0.1538231  | 0.274221949 | -0.12  |
| cg12641739 | II | 37 | 1  | 235062535 |                   | 0.46 | 0.01197  | 1.92207 | 0.68566288 | 0.565383742 | 0.12   |
| cg08579962 | II | 37 | 2  | 445224    |                   | 0.46 | 0.01197  | 1.92207 | 0.69235    | 0.572631611 | 0.12   |
| cg09034753 | II | 37 | 2  | 242810748 | C2orf85           | 0.42 | 0.02991  | 1.52413 | 0.60064682 | 0.480162917 | 0.12   |
| cg25214561 | II | 37 | 3  | 11494984  | ATG7;ATG7;ATG7    | 0.62 | 0.0001   | 3.98291 | 0.72330807 | 0.843241715 | -0.12  |
| cg16143049 | II | 37 | 3  | 124768294 | HEG1              | 0.54 | 0.0014   | 2.85345 | 0.48654265 | 0.607024237 | -0.12  |
| cg07853489 | II | 37 | 3  | 183411982 |                   | 0.5  | 0.00432  | 2.36443 | 0.36611997 | 0.486130694 | -0.12  |
| cg08116915 | II | 37 | 4  | 8597048   | CPZ;CPZ;CPZ       | 0.5  | 0.00432  | 2.36443 | 0.77179167 | 0.651734082 | 0.12   |
| cg00177388 | II | 37 | 5  | 72677886  |                   | 0.5  | 0.00432  | 2.36443 | 0.14472044 | 0.264224852 | -0.12  |
| cg10205431 | I  | 37 | 5  | 140215762 | PCDHA6;PCDHA2;P   | 0.58 | 0.00041  | 3.39184 | 0.80226857 | 0.922568914 | -0.12  |
| cg15621178 | II | 37 | 5  | 148663537 | AFAP1L1;AFAP1L1   | 0.58 | 0.00041  | 3.39184 | 0.77520362 | 0.655619511 | 0.12   |
| cg02711886 | II | 37 | 5  | 177762428 | COL23A1           | 0.67 | 2.34E-05 | 4.63072 | 0.29932752 | 0.419180276 | -0.12  |
| cg26525121 | II | 37 | 6  | 14129370  | CD83;CD83         | 0.46 | 0.01197  | 1.92207 | 0.83584513 | 0.715380902 | 0.12   |
| cg20605134 | I  | 37 | 6  | 15400462  | JARID2            | 0.42 | 0.02991  | 1.52413 | 0.29678177 | 0.4169074   | -0.12  |
| cg08415973 | II | 37 | 6  | 40346114  | TDRG1             | 0.5  | 0.00432  | 2.36443 | 0.34295048 | 0.462700693 | -0.12  |
| cg09199562 | I  | 37 | 7  | 182369    |                   | 0.42 | 0.02991  | 1.52413 | 0.8447078  | 0.725083395 | 0.12   |
| cg10022248 | I  | 37 | 7  | 1686836   |                   | 0.5  | 0.00432  | 2.36443 | 0.63140807 | 0.511156269 | 0.12   |
| cg24939194 | II | 37 | 7  | 2563611   | LFNG;LFNG;LFNG;LI | 0.54 | 0.0014   | 2.85345 | 0.59093772 | 0.711120719 | -0.12  |
| cg12362478 | II | 37 | 7  | 32497799  |                   | 0.46 | 0.01197  | 1.92207 | 0.26773429 | 0.387638711 | -0.12  |

|            |    |    |    |           |                           |      |          |         |            |             |       |
|------------|----|----|----|-----------|---------------------------|------|----------|---------|------------|-------------|-------|
| cg26460483 | II | 37 | 7  | 97914016  | BRI3;BRI3                 | 0.67 | 2.34E-05 | 4.63072 | 0.30846855 | 0.428532037 | -0.12 |
| cg00374672 | II | 37 | 7  | 100463416 | SLC12A9                   | 0.58 | 0.00041  | 3.39184 | 0.21252813 | 0.332149753 | -0.12 |
| cg12086281 | II | 37 | 7  | 134924584 | STRA8                     | 0.46 | 0.01197  | 1.92207 | 0.80706066 | 0.686923764 | 0.12  |
| cg11848254 | II | 37 | 7  | 134939464 | STRA8                     | 0.54 | 0.0014   | 2.85345 | 0.22583782 | 0.346221838 | -0.12 |
| cg06333800 | II | 37 | 7  | 151442481 | PRKAG2;PRKAG2             | 0.46 | 0.01197  | 1.92207 | 0.38047579 | 0.500209737 | -0.12 |
| cg03978658 | II | 37 | 8  | 37761565  |                           | 0.58 | 0.00041  | 3.39184 | 0.27746668 | 0.397167293 | -0.12 |
| cg16408820 | II | 37 | 8  | 134165361 |                           | 0.46 | 0.01197  | 1.92207 | 0.76301237 | 0.642901674 | 0.12  |
| cg15920669 | II | 37 | 8  | 142037502 |                           | 0.62 | 0.0001   | 3.98291 | 0.7212525  | 0.84152149  | -0.12 |
| cg10632966 | II | 37 | 10 | 105001051 |                           | 0.54 | 0.0014   | 2.85345 | 0.79553938 | 0.915632119 | -0.12 |
| cg17333973 | II | 37 | 11 | 2847019   | KCNQ1;KCNQ1               | 0.62 | 0.0001   | 3.98291 | 0.39067698 | 0.510807709 | -0.12 |
| cg09039751 | II | 37 | 11 | 45672100  | CHST1                     | 0.58 | 0.00041  | 3.39184 | 0.56169332 | 0.682158426 | -0.12 |
| cg07267600 | II | 37 | 12 | 2750053   | CACNA1C;CACNA1C           | 0.46 | 0.01197  | 1.92207 | 0.31022394 | 0.430152225 | -0.12 |
| cg00156995 | II | 37 | 13 | 41055588  | LOC646982;LOC646          | 0.54 | 0.0014   | 2.85345 | 0.45064757 | 0.330459953 | 0.12  |
| cg03917803 | II | 37 | 13 | 44947247  | SERP2                     | 0.46 | 0.01197  | 1.92207 | 0.58807152 | 0.708126543 | -0.12 |
| cg16229875 | II | 37 | 14 | 23589066  | CEBPE                     | 0.46 | 0.01197  | 1.92207 | 0.65999951 | 0.780353859 | -0.12 |
| cg04193065 | II | 37 | 15 | 31528995  |                           | 0.46 | 0.01197  | 1.92207 | 0.5286167  | 0.648834219 | -0.12 |
| cg27141517 | II | 37 | 15 | 66923526  |                           | 0.62 | 0.0001   | 3.98291 | 0.38727016 | 0.5071332   | -0.12 |
| cg19570897 | II | 37 | 15 | 90191316  | KIF7                      | 0.5  | 0.00432  | 2.36443 | 0.60991253 | 0.729932134 | -0.12 |
| cg27576259 | II | 37 | 16 | 2567316   | ATP6V0C                   | 0.5  | 0.00432  | 2.36443 | 0.72321576 | 0.843086023 | -0.12 |
| cg16520815 | I  | 37 | 16 | 4733181   | MGRN1;MGRN1;MGRN1         | 0.46 | 0.01197  | 1.92207 | 0.6795838  | 0.799520144 | -0.12 |
| cg09781650 | II | 37 | 16 | 66285054  |                           | 0.5  | 0.00432  | 2.36443 | 0.76129729 | 0.641397602 | 0.12  |
| cg27614309 | II | 37 | 16 | 85478580  |                           | 0.5  | 0.00432  | 2.36443 | 0.69606352 | 0.575844623 | 0.12  |
| cg01898661 | I  | 37 | 16 | 90114063  | LOC100130015;LOC100130015 | 0.46 | 0.01197  | 1.92207 | 0.06503194 | 0.184771956 | -0.12 |
| cg23630423 | II | 37 | 17 | 1903022   | RTN4RL1                   | 0.54 | 0.0014   | 2.85345 | 0.50531239 | 0.625217816 | -0.12 |
| cg04324276 | II | 37 | 17 | 17817462  | TOM1L2;TOM1L2             | 0.62 | 0.0001   | 3.98291 | 0.31101337 | 0.43127373  | -0.12 |
| cg26829529 | II | 37 | 17 | 31317536  | SPACA3                    | 0.5  | 0.00432  | 2.36443 | 0.76226403 | 0.64247456  | 0.12  |
| cg25306838 | II | 37 | 17 | 39597402  | KRT38;KRT38               | 0.54 | 0.0014   | 2.85345 | 0.73059179 | 0.610900524 | 0.12  |
| cg19982668 | II | 37 | 17 | 61753497  | MAP3K3;MAP3K3             | 0.58 | 0.00041  | 3.39184 | 0.32521947 | 0.445300943 | -0.12 |
| cg11183935 | I  | 37 | 17 | 80733167  | TBCD                      | 0.46 | 0.01197  | 1.92207 | 0.75342527 | 0.633259493 | 0.12  |
| cg21088259 | II | 37 | 17 | 81039990  | METRNL                    | 0.46 | 0.01197  | 1.92207 | 0.55927623 | 0.679387409 | -0.12 |
| cg25627226 | II | 37 | 18 | 4455337   |                           | 0.58 | 0.00041  | 3.39184 | 0.09016722 | 0.210628529 | -0.12 |
| cg00220661 | II | 37 | 18 | 74241269  | LOC284276                 | 0.58 | 0.00041  | 3.39184 | 0.11377954 | 0.234101783 | -0.12 |
| cg02194396 | II | 37 | 19 | 427162    | SHC2                      | 0.62 | 0.0001   | 3.98291 | 0.51899137 | 0.638548911 | -0.12 |

|            |    |    |    |           |                    |      |         |         |            |             |        |
|------------|----|----|----|-----------|--------------------|------|---------|---------|------------|-------------|--------|
| cg08676438 | II | 37 | 19 | 1763695   | ONECUT3            | 0.58 | 0.00041 | 3.39184 | 0.42182926 | 0.542176268 | -0.12  |
| cg24800754 | II | 37 | 19 | 6234327   | MLLT1              | 0.5  | 0.00432 | 2.36443 | 0.20505984 | 0.325477678 | -0.12  |
| cg19913465 | II | 37 | 19 | 7767075   | FCER2              | 0.46 | 0.01197 | 1.92207 | 0.36795377 | 0.248053814 | 0.12   |
| cg18093635 | II | 37 | 19 | 14890139  | EMR2;EMR2;EMR2;    | 0.5  | 0.00432 | 2.36443 | 0.61331477 | 0.733773821 | -0.12  |
| cg10738025 | II | 37 | 19 | 19702508  | PBX4               | 0.5  | 0.00432 | 2.36443 | 0.85938221 | 0.739469858 | 0.12   |
| cg06538345 | II | 37 | 19 | 49993186  | RPL13AP5;SNORD3    | 0.42 | 0.02991 | 1.52413 | 0.69902598 | 0.578962674 | 0.12   |
| cg25537993 | I  | 37 | 19 | 58545182  | ZSCAN1             | 0.46 | 0.01197 | 1.92207 | 0.13073595 | 0.250730521 | -0.12  |
| cg08642068 | II | 37 | 20 | 31591776  | SPAG4L             | 0.42 | 0.02991 | 1.52413 | 0.74073911 | 0.861154389 | -0.12  |
| cg14679444 | I  | 37 | 22 | 50470101  | TTL8               | 0.42 | 0.02991 | 1.52413 | 0.8112356  | 0.691126733 | 0.12   |
| cg08945450 | II | 37 | 1  | 11795905  | AGTRAP;AGTRAP;A    | 0.58 | 0.00041 | 3.39184 | 0.33415116 | 0.453293215 | -0.119 |
| cg07236781 | I  | 37 | 1  | 25291041  | RUNX3              | 0.42 | 0.02991 | 1.52413 | 0.85771247 | 0.738725366 | 0.119  |
| cg10776244 | II | 37 | 1  | 28916695  |                    | 0.58 | 0.00041 | 3.39184 | 0.31714147 | 0.435769277 | -0.119 |
| cg07979236 | II | 37 | 1  | 33516461  |                    | 0.54 | 0.0014  | 2.85345 | 0.51088053 | 0.629800661 | -0.119 |
| cg04362706 | II | 37 | 1  | 57570305  | DAB1               | 0.54 | 0.0014  | 2.85345 | 0.78498942 | 0.665850531 | 0.119  |
| cg04079215 | II | 37 | 1  | 95095221  |                    | 0.46 | 0.01197 | 1.92207 | 0.61835711 | 0.737229911 | -0.119 |
| cg12957986 | II | 37 | 1  | 111061829 | KCNA10             | 0.46 | 0.01197 | 1.92207 | 0.69175603 | 0.57305035  | 0.119  |
| cg17904988 | II | 37 | 1  | 161168451 | NDUFS2;ADAMTS4;    | 0.5  | 0.00432 | 2.36443 | 0.34690239 | 0.466133602 | -0.119 |
| cg13101705 | II | 37 | 1  | 183248593 | NMNAT2;NMNAT2      | 0.58 | 0.00041 | 3.39184 | 0.41147927 | 0.530093877 | -0.119 |
| cg26033504 | II | 37 | 1  | 201458737 | CSRP1;CSRP1        | 0.62 | 0.0001  | 3.98291 | 0.71299863 | 0.831740654 | -0.119 |
| cg16986578 | II | 37 | 1  | 201979567 | ELF3;ELF3          | 0.42 | 0.02991 | 1.52413 | 0.77401738 | 0.655265955 | 0.119  |
| cg27281690 | II | 37 | 2  | 7171963   | RNF144A            | 0.5  | 0.00432 | 2.36443 | 0.35229288 | 0.470826791 | -0.119 |
| cg19139589 | II | 37 | 2  | 25149093  |                    | 0.5  | 0.00432 | 2.36443 | 0.57153878 | 0.690985976 | -0.119 |
| cg02039404 | II | 37 | 2  | 70368784  |                    | 0.54 | 0.0014  | 2.85345 | 0.83735708 | 0.717886669 | 0.119  |
| cg13355542 | II | 37 | 2  | 97199248  |                    | 0.5  | 0.00432 | 2.36443 | 0.19845155 | 0.317027244 | -0.119 |
| cg19914238 | II | 37 | 2  | 113483728 |                    | 0.42 | 0.02991 | 1.52413 | 0.84972992 | 0.731165199 | 0.119  |
| cg07719512 | II | 37 | 2  | 219246576 | SLC11A1            | 0.46 | 0.01197 | 1.92207 | 0.39916084 | 0.518381873 | -0.119 |
| cg27104695 | II | 37 | 3  | 15345841  | SH3BP5;SH3BP5      | 0.46 | 0.01197 | 1.92207 | 0.4809089  | 0.362011051 | 0.119  |
| cg17619311 | I  | 37 | 3  | 42947565  | ZNF662;ZNF662;Z    | 0.46 | 0.01197 | 1.92207 | 0.12638585 | 0.245587208 | -0.119 |
| cg13344886 | II | 37 | 3  | 45167106  | CDCP1;CDCP1        | 0.42 | 0.02991 | 1.52413 | 0.82100713 | 0.702036061 | 0.119  |
| cg22090713 | II | 37 | 3  | 50379032  | RASSF1;ZMYND10;f   | 0.5  | 0.00432 | 2.36443 | 0.38116214 | 0.499952105 | -0.119 |
| cg17408686 | II | 37 | 3  | 126422575 | CHCHD6             | 0.42 | 0.02991 | 1.52413 | 0.34406172 | 0.463232213 | -0.119 |
| cg25197194 | II | 37 | 3  | 128758787 | CCDC48             | 0.54 | 0.0014  | 2.85345 | 0.54888101 | 0.668318901 | -0.119 |
| cg09436767 | II | 37 | 3  | 184035154 | EIF4G1;EIF4G1;EIF4 | 0.54 | 0.0014  | 2.85345 | 0.49815545 | 0.617372023 | -0.119 |

|            |    |    |    |                           |      |          |         |            |             |        |
|------------|----|----|----|---------------------------|------|----------|---------|------------|-------------|--------|
| cg25441176 | I  | 37 | 4  | 178417930                 | 0.79 | 1.06E-07 | 6.97389 | 0.47928027 | 0.360484747 | 0.119  |
| cg23915282 | II | 37 | 5  | 135547572                 | 0.5  | 0.00432  | 2.36443 | 0.73503765 | 0.616154003 | 0.119  |
| cg13598881 | II | 37 | 6  | 2783665 WRNIP1;WRNIP1     | 0.42 | 0.02991  | 1.52413 | 0.62257691 | 0.74133821  | -0.119 |
| cg19886655 | II | 37 | 6  | 2958852 SERPINB6          | 0.5  | 0.00432  | 2.36443 | 0.19011335 | 0.308781716 | -0.119 |
| cg08560874 | II | 37 | 6  | 29759947 HCG4             | 0.54 | 0.0014   | 2.85345 | 0.18163794 | 0.300513265 | -0.119 |
| cg18950108 | II | 37 | 6  | 30920171 DPCR1            | 0.42 | 0.02991  | 1.52413 | 0.73821828 | 0.619486019 | 0.119  |
| cg14306709 | II | 37 | 6  | 31547704                  | 0.54 | 0.0014   | 2.85345 | 0.60306508 | 0.483901241 | 0.119  |
| cg09080120 | II | 37 | 6  | 33246105 B3GALT4          | 0.42 | 0.02991  | 1.52413 | 0.69630433 | 0.577368275 | 0.119  |
| cg18291422 | I  | 37 | 6  | 147171560                 | 0.46 | 0.01197  | 1.92207 | 0.83426596 | 0.7155584   | 0.119  |
| cg05698763 | II | 37 | 7  | 91685                     | 0.5  | 0.00432  | 2.36443 | 0.84331649 | 0.724739222 | 0.119  |
| cg00541718 | II | 37 | 7  | 630823 PRKAR1B;PRKAR1B    | 0.42 | 0.02991  | 1.52413 | 0.54781326 | 0.667138455 | -0.119 |
| cg00511027 | II | 37 | 7  | 1062887 C7orf50;C7orf50;M | 0.5  | 0.00432  | 2.36443 | 0.58670895 | 0.467546883 | 0.119  |
| cg23367351 | II | 37 | 7  | 2106029 MAD1L1;MAD1L1;M   | 0.5  | 0.00432  | 2.36443 | 0.72489661 | 0.605649258 | 0.119  |
| cg04919592 | II | 37 | 7  | 2607232 IQCE;IQCE         | 0.42 | 0.02991  | 1.52413 | 0.68810477 | 0.80661154  | -0.119 |
| cg18814699 | II | 37 | 7  | 36342851                  | 0.67 | 2.34E-05 | 4.63072 | 0.7314199  | 0.850543929 | -0.119 |
| cg12361987 | II | 37 | 7  | 50109467 ZPBP;ZPBP        | 0.62 | 0.0001   | 3.98291 | 0.12918226 | 0.247708698 | -0.119 |
| cg00601368 | II | 37 | 7  | 149318081 ZNF767;ZNF767   | 0.46 | 0.01197  | 1.92207 | 0.57761993 | 0.458233647 | 0.119  |
| cg08525461 | II | 37 | 8  | 40958085                  | 0.46 | 0.01197  | 1.92207 | 0.70917587 | 0.589774735 | 0.119  |
| cg16499923 | I  | 37 | 8  | 142183642 DENND3          | 0.46 | 0.01197  | 1.92207 | 0.49823778 | 0.617144078 | -0.119 |
| cg11277662 | II | 37 | 8  | 143408047 TSNARE1         | 0.42 | 0.02991  | 1.52413 | 0.52217886 | 0.640845057 | -0.119 |
| cg18198461 | II | 37 | 8  | 143523293                 | 0.54 | 0.0014   | 2.85345 | 0.52828809 | 0.409067656 | 0.119  |
| cg13394182 | II | 37 | 8  | 144403454 TOP1MT          | 0.58 | 0.00041  | 3.39184 | 0.64271315 | 0.762187784 | -0.119 |
| cg06617876 | II | 37 | 9  | 139652874 LCN8            | 0.54 | 0.0014   | 2.85345 | 0.34422181 | 0.224839664 | 0.119  |
| cg12038298 | II | 37 | 11 | 1951814 TNNT3;TNNT3;TNN   | 0.58 | 0.00041  | 3.39184 | 0.75212658 | 0.632820139 | 0.119  |
| cg17696044 | II | 37 | 11 | 70449316 SHANK2;SHANK2    | 0.58 | 0.00041  | 3.39184 | 0.18821665 | 0.306782046 | -0.119 |
| cg23077606 | II | 37 | 11 | 70540206 SHANK2           | 0.5  | 0.00432  | 2.36443 | 0.71049523 | 0.591103376 | 0.119  |
| cg04757806 | I  | 37 | 11 | 94278595 FUT4             | 0.58 | 0.00041  | 3.39184 | 0.56575179 | 0.68426209  | -0.119 |
| cg22779972 | I  | 37 | 12 | 3207241 TSPAN9;TSPAN9     | 0.42 | 0.02991  | 1.52413 | 0.86225023 | 0.743364101 | 0.119  |
| cg07533239 | II | 37 | 12 | 6422131 PLEKHG6;PLEKHG6;  | 0.5  | 0.00432  | 2.36443 | 0.58520616 | 0.466136078 | 0.119  |
| cg20114528 | II | 37 | 12 | 48552006 ASB8             | 0.54 | 0.0014   | 2.85345 | 0.76513063 | 0.646048422 | 0.119  |
| cg02399464 | II | 37 | 12 | 50482541 SMARCD1;SMARCD   | 0.54 | 0.0014   | 2.85345 | 0.4138915  | 0.295379471 | 0.119  |
| cg10097651 | II | 37 | 14 | 35802397                  | 0.42 | 0.02991  | 1.52413 | 0.28387239 | 0.403318684 | -0.119 |
| cg13097800 | II | 37 | 14 | 47104140                  | 0.5  | 0.00432  | 2.36443 | 0.60217652 | 0.48335561  | 0.119  |

|            |    |    |    |                            |      |          |         |            |             |        |
|------------|----|----|----|----------------------------|------|----------|---------|------------|-------------|--------|
| cg11820833 | II | 37 | 14 | 65187054 PLEKHG3           | 0.54 | 0.0014   | 2.85345 | 0.61380783 | 0.732496655 | -0.119 |
| cg16405432 | II | 37 | 14 | 95973710                   | 0.5  | 0.00432  | 2.36443 | 0.36602749 | 0.48473193  | -0.119 |
| cg00011861 | II | 37 | 14 | 103607265                  | 0.58 | 0.00041  | 3.39184 | 0.23758787 | 0.119024593 | 0.119  |
| cg24860562 | II | 37 | 15 | 31516481                   | 0.54 | 0.0014   | 2.85345 | 0.70141475 | 0.820281197 | -0.119 |
| cg08145839 | I  | 37 | 16 | 922126 LMF1                | 0.46 | 0.01197  | 1.92207 | 0.74654582 | 0.627941878 | 0.119  |
| cg01881308 | I  | 37 | 16 | 1389301 BAIAP3             | 0.5  | 0.00432  | 2.36443 | 0.70202145 | 0.58310494  | 0.119  |
| cg08776660 | II | 37 | 16 | 1670473 CRAMP1L            | 0.46 | 0.01197  | 1.92207 | 0.65812913 | 0.539469182 | 0.119  |
| cg06716402 | II | 37 | 16 | 18494340                   | 0.54 | 0.0014   | 2.85345 | 0.55933911 | 0.67853078  | -0.119 |
| cg00355286 | I  | 37 | 16 | 55525729 MMP2;MMP2         | 0.46 | 0.01197  | 1.92207 | 0.72974073 | 0.611167488 | 0.119  |
| cg06575692 | II | 37 | 16 | 68112968 DUS2L             | 0.58 | 0.00041  | 3.39184 | 0.64218286 | 0.761328937 | -0.119 |
| cg00759807 | I  | 37 | 16 | 89390789 ANKRD11           | 0.46 | 0.01197  | 1.92207 | 0.66851828 | 0.549615128 | 0.119  |
| cg26748477 | II | 37 | 17 | 38516415                   | 0.54 | 0.0014   | 2.85345 | 0.65141923 | 0.532152534 | 0.119  |
| cg01248878 | II | 37 | 17 | 58155376 HEATR6            | 0.5  | 0.00432  | 2.36443 | 0.16078246 | 0.279754112 | -0.119 |
| cg19787125 | II | 37 | 17 | 71532174 SDK2              | 0.42 | 0.02991  | 1.52413 | 0.658544   | 0.539394956 | 0.119  |
| cg16366686 | II | 37 | 17 | 75315837 SEPT9;SEPT9;SEPT9 | 0.54 | 0.0014   | 2.85345 | 0.36170628 | 0.481065348 | -0.119 |
| cg02836325 | II | 37 | 17 | 76403955 PGS1              | 0.58 | 0.00041  | 3.39184 | 0.57937969 | 0.698787199 | -0.119 |
| cg23628350 | II | 37 | 17 | 80561982 FOXK2             | 0.46 | 0.01197  | 1.92207 | 0.57123724 | 0.689931946 | -0.119 |
| cg23345292 | II | 37 | 18 | 44099184 LOXHD1;LOXHD1;L   | 0.54 | 0.0014   | 2.85345 | 0.6881968  | 0.569519171 | 0.119  |
| cg26988138 | I  | 37 | 19 | 2639424 GNG7               | 0.42 | 0.02991  | 1.52413 | 0.27338393 | 0.392512623 | -0.119 |
| cg14402591 | II | 37 | 19 | 4543487 SEMA6B             | 0.46 | 0.01197  | 1.92207 | 0.48711492 | 0.605625663 | -0.119 |
| cg15463580 | II | 37 | 19 | 6113945                    | 0.58 | 0.00041  | 3.39184 | 0.64866297 | 0.768089001 | -0.119 |
| cg21535253 | I  | 37 | 19 | 12758416 MAN2B1            | 0.58 | 0.00041  | 3.39184 | 0.61594047 | 0.734970804 | -0.119 |
| cg18339718 | II | 37 | 19 | 12759034 MAN2B1            | 0.46 | 0.01197  | 1.92207 | 0.40785392 | 0.526883328 | -0.119 |
| cg17769836 | II | 37 | 19 | 45445437 APOC4             | 0.5  | 0.00432  | 2.36443 | 0.77146088 | 0.651987583 | 0.119  |
| cg04401876 | II | 37 | 19 | 45445449 APOC4             | 0.67 | 2.34E-05 | 4.63072 | 0.78592038 | 0.666929346 | 0.119  |
| cg16618260 | II | 37 | 19 | 50177057 BCL2L12;BCL2L12   | 0.46 | 0.01197  | 1.92207 | 0.77399288 | 0.654899671 | 0.119  |
| cg01552272 | I  | 37 | 20 | 13976096 MACROD2           | 0.58 | 0.00041  | 3.39184 | 0.09385685 | 0.213343587 | -0.119 |
| cg14801864 | II | 37 | 20 | 17540975 BFSP1             | 0.5  | 0.00432  | 2.36443 | 0.63458813 | 0.7533337   | -0.119 |
| cg09696044 | II | 37 | 20 | 55968294 RBM38;RBM38       | 0.54 | 0.0014   | 2.85345 | 0.2187174  | 0.099690207 | 0.119  |
| cg06546183 | II | 37 | 21 | 44257072                   | 0.5  | 0.00432  | 2.36443 | 0.66829834 | 0.549266642 | 0.119  |
| cg18696237 | II | 37 | 22 | 39491975 APOBEC3H;APOBEC   | 0.46 | 0.01197  | 1.92207 | 0.70455916 | 0.585912688 | 0.119  |
| cg24849633 | II | 37 | 22 | 51142900 SHANK3            | 0.54 | 0.0014   | 2.85345 | 0.49307309 | 0.612153479 | -0.119 |
| cg11080552 | II | 37 | 1  | 8556722 RERE;RERE          | 0.46 | 0.01197  | 1.92207 | 0.6540523  | 0.535883774 | 0.118  |

|            |    |    |   |           |                  |      |          |         |            |             |        |
|------------|----|----|---|-----------|------------------|------|----------|---------|------------|-------------|--------|
| cg15527643 | II | 37 | 1 | 11795946  | AGTRAP;AGTRAP;A  | 0.58 | 0.00041  | 3.39184 | 0.3657355  | 0.484081152 | -0.118 |
| cg00980060 | II | 37 | 1 | 14849511  |                  | 0.54 | 0.0014   | 2.85345 | 0.61910967 | 0.500639094 | 0.118  |
| cg24925701 | II | 37 | 1 | 18553942  | IGSF21           | 0.46 | 0.01197  | 1.92207 | 0.68030664 | 0.797844329 | -0.118 |
| cg25138553 | II | 37 | 1 | 22223841  | HSPG2            | 0.71 | 4.57E-06 | 5.34042 | 0.74160829 | 0.859644484 | -0.118 |
| cg13303520 | II | 37 | 1 | 32856704  | BSDC1;BSDC1;BSDC | 0.5  | 0.00432  | 2.36443 | 0.2027436  | 0.320560983 | -0.118 |
| cg06638529 | II | 37 | 1 | 44704073  | ER13             | 0.54 | 0.0014   | 2.85345 | 0.28581621 | 0.40390867  | -0.118 |
| cg27291710 | II | 37 | 1 | 115866441 | NGF              | 0.46 | 0.01197  | 1.92207 | 0.57132208 | 0.453749717 | 0.118  |
| cg11953775 | I  | 37 | 1 | 207597011 |                  | 0.5  | 0.00432  | 2.36443 | 0.8698046  | 0.751933962 | 0.118  |
| cg16137147 | I  | 37 | 1 | 221067896 |                  | 0.46 | 0.01197  | 1.92207 | 0.17115215 | 0.28893561  | -0.118 |
| cg12136950 | II | 37 | 1 | 226849798 | ITPKB            | 0.46 | 0.01197  | 1.92207 | 0.58871573 | 0.470735057 | 0.118  |
| cg12280471 | II | 37 | 1 | 247587794 | NLRP3;NLRP3;NLRP | 0.58 | 0.00041  | 3.39184 | 0.84867747 | 0.730422787 | 0.118  |
| cg14659606 | II | 37 | 2 | 20291806  |                  | 0.54 | 0.0014   | 2.85345 | 0.78248558 | 0.664292281 | 0.118  |
| cg04335293 | II | 37 | 2 | 24713157  |                  | 0.58 | 0.00041  | 3.39184 | 0.27353614 | 0.391356872 | -0.118 |
| cg07338715 | II | 37 | 2 | 109649281 |                  | 0.42 | 0.02991  | 1.52413 | 0.54253493 | 0.660595243 | -0.118 |
| cg20968678 | II | 37 | 2 | 216948982 | TMEM169;TMEM16   | 0.5  | 0.00432  | 2.36443 | 0.68973469 | 0.572003129 | 0.118  |
| cg13321077 | I  | 37 | 2 | 220196755 | RESP18           | 0.42 | 0.02991  | 1.52413 | 0.25205014 | 0.370358497 | -0.118 |
| cg23906687 | II | 37 | 2 | 239047029 | KLHL30           | 0.42 | 0.02991  | 1.52413 | 0.47456971 | 0.356260383 | 0.118  |
| cg07480446 | II | 37 | 2 | 239069576 |                  | 0.58 | 0.00041  | 3.39184 | 0.61053616 | 0.728483226 | -0.118 |
| cg08276645 | II | 37 | 2 | 241459502 | ANKMY1;ANKMY1    | 0.5  | 0.00432  | 2.36443 | 0.56939181 | 0.687124454 | -0.118 |
| cg18863595 | I  | 37 | 3 | 6902845   | GRM7;GRM7;GRM7   | 0.46 | 0.01197  | 1.92207 | 0.16921077 | 0.287566353 | -0.118 |
| cg03589820 | II | 37 | 3 | 11585825  | ATG7;ATG7;ATG7   | 0.54 | 0.0014   | 2.85345 | 0.60504948 | 0.722907346 | -0.118 |
| cg02555923 | II | 37 | 3 | 14319984  |                  | 0.54 | 0.0014   | 2.85345 | 0.30949436 | 0.427391608 | -0.118 |
| cg11931463 | II | 37 | 3 | 156807379 |                  | 0.5  | 0.00432  | 2.36443 | 0.57091313 | 0.45328155  | 0.118  |
| cg05937737 | I  | 37 | 3 | 170303540 | SLC7A14          | 0.58 | 0.00041  | 3.39184 | 0.30395395 | 0.421617859 | -0.118 |
| cg06085579 | II | 37 | 3 | 171509822 | PLD1;PLD1        | 0.46 | 0.01197  | 1.92207 | 0.6459212  | 0.528401407 | 0.118  |
| cg05027594 | II | 37 | 4 | 16225910  | TAPT1            | 0.5  | 0.00432  | 2.36443 | 0.61999749 | 0.737756723 | -0.118 |
| cg02458885 | II | 37 | 4 | 81119249  | PRDM8;PRDM8      | 0.5  | 0.00432  | 2.36443 | 0.28062634 | 0.398373353 | -0.118 |
| cg19431495 | II | 37 | 5 | 454456    | EXOC3            | 0.58 | 0.00041  | 3.39184 | 0.74310386 | 0.624956997 | 0.118  |
| cg10530883 | I  | 37 | 5 | 3596207   | IRX1;IRX1        | 0.46 | 0.01197  | 1.92207 | 0.13152586 | 0.249510177 | -0.118 |
| cg15422005 | II | 37 | 5 | 87991197  |                  | 0.54 | 0.0014   | 2.85345 | 0.27046859 | 0.388685157 | -0.118 |
| cg00808170 | II | 37 | 5 | 140807787 | PCDHGA4;PCDHGA   | 0.5  | 0.00432  | 2.36443 | 0.50438725 | 0.622353351 | -0.118 |
| cg15697257 | II | 37 | 5 | 150020212 | SYNPO;SYNPO;SYN  | 0.5  | 0.00432  | 2.36443 | 0.32749678 | 0.445668198 | -0.118 |
| cg25221615 | II | 37 | 5 | 158532962 |                  | 0.46 | 0.01197  | 1.92207 | 0.63967086 | 0.758130993 | -0.118 |

|            |    |    |    |                                 |      |          |         |            |             |        |
|------------|----|----|----|---------------------------------|------|----------|---------|------------|-------------|--------|
| cg03228145 | II | 37 | 5  | 178204763 AACSL                 | 0.62 | 0.0001   | 3.98291 | 0.15477143 | 0.272808418 | -0.118 |
| cg00582971 | I  | 37 | 5  | 178422128 GRM6                  | 0.54 | 0.0014   | 2.85345 | 0.0836711  | 0.201489035 | -0.118 |
| cg01905633 | I  | 37 | 6  | 3849391 FAM50B                  | 0.75 | 7.61E-07 | 6.11857 | 0.42574743 | 0.307376437 | 0.118  |
| cg26514623 | II | 37 | 6  | 13295561                        | 0.46 | 0.01197  | 1.92207 | 0.73253193 | 0.850870049 | -0.118 |
| cg12105190 | II | 37 | 6  | 30653407 KIAA1949;KIAA1949      | 0.46 | 0.01197  | 1.92207 | 0.30112239 | 0.182827507 | 0.118  |
| cg00975876 | II | 37 | 6  | 41752769 PRICKLE4               | 0.5  | 0.00432  | 2.36443 | 0.5812614  | 0.699196539 | -0.118 |
| cg20732076 | II | 37 | 6  | 42335231 TRERF1                 | 0.46 | 0.01197  | 1.92207 | 0.27471417 | 0.392834028 | -0.118 |
| cg15787744 | II | 37 | 6  | 44234175 NFKBIE                 | 0.46 | 0.01197  | 1.92207 | 0.36018598 | 0.24221807  | 0.118  |
| cg13629388 | II | 37 | 6  | 170687780 FAM120B               | 0.42 | 0.02991  | 1.52413 | 0.33044454 | 0.448602698 | -0.118 |
| cg26620655 | I  | 37 | 7  | 1113029 C7orf50;C7orf50;C7orf50 | 0.5  | 0.00432  | 2.36443 | 0.343585   | 0.461606968 | -0.118 |
| cg26724841 | II | 37 | 7  | 5816628 RNF216;RNF216           | 0.5  | 0.00432  | 2.36443 | 0.63761891 | 0.5196462   | 0.118  |
| cg06682445 | II | 37 | 7  | 43915791 URGCP;URGCP;URGCP      | 0.46 | 0.01197  | 1.92207 | 0.47415389 | 0.592586239 | -0.118 |
| cg06807926 | II | 37 | 7  | 150773709 FASTK;FASTK           | 0.62 | 0.0001   | 3.98291 | 0.58539916 | 0.702928911 | -0.118 |
| cg26607620 | I  | 37 | 8  | 1497078 DLGAP2                  | 0.46 | 0.01197  | 1.92207 | 0.78110472 | 0.898655255 | -0.118 |
| cg20103825 | II | 37 | 8  | 1993545 MYOM2                   | 0.42 | 0.02991  | 1.52413 | 0.34864829 | 0.230352587 | 0.118  |
| cg00318347 | II | 37 | 8  | 25812500 EBF2                   | 0.42 | 0.02991  | 1.52413 | 0.5961997  | 0.71387923  | -0.118 |
| cg25247520 | II | 37 | 8  | 128808017 MIR1204;PVT1          | 0.58 | 0.00041  | 3.39184 | 0.50295444 | 0.384561883 | 0.118  |
| cg14708514 | II | 37 | 8  | 141609338 EIF2C2;EIF2C2         | 0.46 | 0.01197  | 1.92207 | 0.17537946 | 0.293679739 | -0.118 |
| cg03487430 | II | 37 | 9  | 35616244 CD72                   | 0.42 | 0.02991  | 1.52413 | 0.59930818 | 0.481733928 | 0.118  |
| cg14623306 | II | 37 | 9  | 84280537 TLE1                   | 0.5  | 0.00432  | 2.36443 | 0.29714165 | 0.415027327 | -0.118 |
| cg16274762 | II | 37 | 11 | 1481779 BRSK2                   | 0.46 | 0.01197  | 1.92207 | 0.37099298 | 0.489244984 | -0.118 |
| cg04959790 | II | 37 | 11 | 47278977 NR1H3;NR1H3;NR1H3      | 0.62 | 0.0001   | 3.98291 | 0.51370805 | 0.632114157 | -0.118 |
| cg05820396 | II | 37 | 11 | 111055240                       | 0.42 | 0.02991  | 1.52413 | 0.64279741 | 0.524416697 | 0.118  |
| cg10700424 | I  | 37 | 11 | 134201952 GLB1L2;GLB1L2         | 0.5  | 0.00432  | 2.36443 | 0.03274224 | 0.150968957 | -0.118 |
| cg00766289 | I  | 37 | 12 | 3311121 TSPAN9;TSPAN9           | 0.5  | 0.00432  | 2.36443 | 0.57887296 | 0.461367326 | 0.118  |
| cg13135241 | II | 37 | 12 | 104765292                       | 0.62 | 0.0001   | 3.98291 | 0.41748939 | 0.53543024  | -0.118 |
| cg01363734 | II | 37 | 12 | 117482953 TESC;TESC;TESC        | 0.5  | 0.00432  | 2.36443 | 0.38540883 | 0.503351128 | -0.118 |
| cg11050793 | I  | 37 | 12 | 124876650 NCOR2;NCOR2           | 0.5  | 0.00432  | 2.36443 | 0.26444913 | 0.382498637 | -0.118 |
| cg11203293 | I  | 37 | 13 | 25777762                        | 0.5  | 0.00432  | 2.36443 | 0.62479991 | 0.506658452 | 0.118  |
| cg01435643 | I  | 37 | 13 | 113689776 MCF2L;MCF2L           | 0.46 | 0.01197  | 1.92207 | 0.44993405 | 0.56794216  | -0.118 |
| cg13061910 | II | 37 | 14 | 21288715                        | 0.54 | 0.0014   | 2.85345 | 0.83441735 | 0.716682562 | 0.118  |
| cg23198262 | II | 37 | 14 | 22978073                        | 0.58 | 0.00041  | 3.39184 | 0.73420011 | 0.616694937 | 0.118  |
| cg23373640 | II | 37 | 14 | 65696480                        | 0.54 | 0.0014   | 2.85345 | 0.42418939 | 0.306172648 | 0.118  |

|            |    |    |    |                            |      |          |         |            |             |        |
|------------|----|----|----|----------------------------|------|----------|---------|------------|-------------|--------|
| cg08796342 | II | 37 | 14 | 92334029 TC2N              | 0.46 | 0.01197  | 1.92207 | 0.71337105 | 0.594881909 | 0.118  |
| cg23641237 | II | 37 | 14 | 106321870                  | 0.54 | 0.0014   | 2.85345 | 0.66611682 | 0.548537472 | 0.118  |
| cg01959287 | II | 37 | 15 | 83515335                   | 0.54 | 0.0014   | 2.85345 | 0.78460971 | 0.666939869 | 0.118  |
| cg27035480 | II | 37 | 16 | 3907755 CREBBP;CREBBP      | 0.5  | 0.00432  | 2.36443 | 0.75843022 | 0.876827964 | -0.118 |
| cg05000199 | II | 37 | 16 | 29701173 QPRT              | 0.67 | 2.34E-05 | 4.63072 | 0.55141748 | 0.669782946 | -0.118 |
| cg05329317 | II | 37 | 16 | 30126595 MAPK3;MAPK3;MA    | 0.5  | 0.00432  | 2.36443 | 0.65699586 | 0.539327976 | 0.118  |
| cg04526858 | II | 37 | 16 | 66635626                   | 0.42 | 0.02991  | 1.52413 | 0.50880731 | 0.390503258 | 0.118  |
| cg09482050 | I  | 37 | 16 | 67686832 RLTPR             | 0.42 | 0.02991  | 1.52413 | 0.59009671 | 0.707627674 | -0.118 |
| cg00268744 | II | 37 | 16 | 68281186 PLA2G15           | 0.58 | 0.00041  | 3.39184 | 0.68905604 | 0.80675714  | -0.118 |
| cg04170065 | II | 37 | 16 | 72153204 PMFBP1;PMFBP1     | 0.67 | 2.34E-05 | 4.63072 | 0.4400684  | 0.558479881 | -0.118 |
| cg27342781 | II | 37 | 16 | 84566279                   | 0.54 | 0.0014   | 2.85345 | 0.47482241 | 0.593295316 | -0.118 |
| cg05295930 | I  | 37 | 16 | 89180285 ACSF3;ACSF3;ACSF3 | 0.5  | 0.00432  | 2.36443 | 0.68508278 | 0.567153196 | 0.118  |
| cg07888884 | II | 37 | 17 | 25886793 KSR1              | 0.46 | 0.01197  | 1.92207 | 0.55746061 | 0.67564448  | -0.118 |
| cg14834285 | II | 37 | 17 | 33897374                   | 0.42 | 0.02991  | 1.52413 | 0.61524563 | 0.732785582 | -0.118 |
| cg14018141 | II | 37 | 17 | 72480644 CD300A            | 0.54 | 0.0014   | 2.85345 | 0.68822536 | 0.570620048 | 0.118  |
| cg18767057 | I  | 37 | 17 | 76175611 TK1               | 0.58 | 0.00041  | 3.39184 | 0.66638243 | 0.784816058 | -0.118 |
| cg19016694 | II | 37 | 17 | 80821826 TBCD              | 0.46 | 0.01197  | 1.92207 | 0.31948161 | 0.201287696 | 0.118  |
| cg20656868 | II | 37 | 19 | 3177310 S1PR4              | 0.42 | 0.02991  | 1.52413 | 0.26011222 | 0.377906362 | -0.118 |
| cg12068366 | II | 37 | 19 | 4548354 SEMA6B             | 0.54 | 0.0014   | 2.85345 | 0.60413351 | 0.721838933 | -0.118 |
| cg02849956 | II | 37 | 19 | 4634827                    | 0.67 | 2.34E-05 | 4.63072 | 0.21860798 | 0.336669985 | -0.118 |
| cg22688564 | II | 37 | 19 | 6271968 MLLT1              | 0.54 | 0.0014   | 2.85345 | 0.59595848 | 0.713670185 | -0.118 |
| cg20704774 | II | 37 | 19 | 15335041                   | 0.58 | 0.00041  | 3.39184 | 0.39039674 | 0.508410965 | -0.118 |
| cg08365609 | II | 37 | 19 | 33726655                   | 0.58 | 0.00041  | 3.39184 | 0.63799607 | 0.519660683 | 0.118  |
| cg13918544 | II | 37 | 19 | 50921232 POLD1;SPIB        | 0.46 | 0.01197  | 1.92207 | 0.74005357 | 0.621726541 | 0.118  |
| cg15838320 | II | 37 | 20 | 49461129 BCAS4;BCAS4;BCAS4 | 0.54 | 0.0014   | 2.85345 | 0.76009216 | 0.642476128 | 0.118  |
| cg20477147 | II | 37 | 20 | 57265991                   | 0.46 | 0.01197  | 1.92207 | 0.3213327  | 0.439457408 | -0.118 |
| cg23208590 | II | 37 | 22 | 37915795 CARD10            | 0.71 | 4.57E-06 | 5.34042 | 0.15634788 | 0.274112646 | -0.118 |
| cg01652190 | II | 37 | 22 | 50026171 C22orf34          | 0.42 | 0.02991  | 1.52413 | 0.63292682 | 0.751055333 | -0.118 |
| cg07701579 | II | 37 | 1  | 2262232 MORN1              | 0.46 | 0.01197  | 1.92207 | 0.73340953 | 0.616467387 | 0.117  |
| cg21826784 | I  | 37 | 1  | 11795937 AGTRAP;AGTRAP;A   | 0.5  | 0.00432  | 2.36443 | 0.3674883  | 0.484765272 | -0.117 |
| cg26353598 | II | 37 | 1  | 14824776                   | 0.54 | 0.0014   | 2.85345 | 0.71982347 | 0.602974091 | 0.117  |
| cg24405951 | I  | 37 | 1  | 19337477                   | 0.42 | 0.02991  | 1.52413 | 0.85502948 | 0.738403589 | 0.117  |
| cg24468934 | II | 37 | 1  | 26880767 MIR1976;RPS6KA1;  | 0.42 | 0.02991  | 1.52413 | 0.51574634 | 0.633034583 | -0.117 |

|            |    |    |   |           |                  |      |          |         |            |             |        |
|------------|----|----|---|-----------|------------------|------|----------|---------|------------|-------------|--------|
| cg24433287 | II | 37 | 1 | 38261057  | MANEAL;MANEAL;I  | 0.46 | 0.01197  | 1.92207 | 0.26960547 | 0.386153177 | -0.117 |
| cg20591472 | II | 37 | 1 | 110008990 | SYPL2            | 0.46 | 0.01197  | 1.92207 | 0.25736091 | 0.374789977 | -0.117 |
| cg07120889 | II | 37 | 1 | 150535935 |                  | 0.5  | 0.00432  | 2.36443 | 0.21863985 | 0.101228105 | 0.117  |
| cg24049880 | II | 37 | 1 | 161171211 | NDUFS2;NDUFS2    | 0.58 | 0.00041  | 3.39184 | 0.2130308  | 0.329863955 | -0.117 |
| cg05799811 | II | 37 | 1 | 167487396 | CD247;CD247      | 0.42 | 0.02991  | 1.52413 | 0.81095916 | 0.693886953 | 0.117  |
| cg26359730 | II | 37 | 1 | 175642761 | TNR              | 0.42 | 0.02991  | 1.52413 | 0.55431126 | 0.437761365 | 0.117  |
| cg25020850 | II | 37 | 1 | 182642186 | RGS8;RGS8        | 0.42 | 0.02991  | 1.52413 | 0.74348349 | 0.626632287 | 0.117  |
| cg01437204 | II | 37 | 1 | 202130344 | PTPN7;PTPN7      | 0.5  | 0.00432  | 2.36443 | 0.24912239 | 0.36596482  | -0.117 |
| cg01910727 | II | 37 | 1 | 226842455 | ITPKB            | 0.46 | 0.01197  | 1.92207 | 0.61043233 | 0.72721881  | -0.117 |
| cg14093127 | II | 37 | 2 | 8714417   |                  | 0.46 | 0.01197  | 1.92207 | 0.7286211  | 0.611365578 | 0.117  |
| cg00484122 | II | 37 | 2 | 20579065  |                  | 0.54 | 0.0014   | 2.85345 | 0.58979197 | 0.70716543  | -0.117 |
| cg01088579 | II | 37 | 2 | 85660497  | SH2D6            | 0.42 | 0.02991  | 1.52413 | 0.64517046 | 0.762355736 | -0.117 |
| cg06442723 | II | 37 | 2 | 97484665  | CNNM3;CNNM3      | 0.42 | 0.02991  | 1.52413 | 0.38252209 | 0.499185717 | -0.117 |
| cg26154999 | II | 37 | 2 | 225266346 | FAM124B;FAM124I  | 0.42 | 0.02991  | 1.52413 | 0.15984418 | 0.276595275 | -0.117 |
| cg00153306 | II | 37 | 3 | 46741492  | TMIE             | 0.67 | 2.34E-05 | 4.63072 | 0.3212075  | 0.437964994 | -0.117 |
| cg21926782 | II | 37 | 3 | 49459909  | AMT;AMT;AMT;NIC  | 0.5  | 0.00432  | 2.36443 | 0.35903194 | 0.475615454 | -0.117 |
| cg26862175 | II | 37 | 3 | 52528955  | STAB1            | 0.54 | 0.0014   | 2.85345 | 0.41905909 | 0.535626244 | -0.117 |
| cg18996141 | II | 37 | 3 | 71359873  | FOXP1;FOXP1      | 0.62 | 0.0001   | 3.98291 | 0.72028527 | 0.837132089 | -0.117 |
| cg10755723 | II | 37 | 3 | 192576964 | C3orf59          | 0.46 | 0.01197  | 1.92207 | 0.65108314 | 0.533849695 | 0.117  |
| cg10631854 | II | 37 | 3 | 197383170 |                  | 0.42 | 0.02991  | 1.52413 | 0.72079014 | 0.603566704 | 0.117  |
| cg10413136 | I  | 37 | 4 | 8207119   | SH3TC1           | 0.5  | 0.00432  | 2.36443 | 0.45009397 | 0.567250708 | -0.117 |
| cg00753676 | II | 37 | 4 | 38662991  | FLJ13197         | 0.58 | 0.00041  | 3.39184 | 0.66074375 | 0.77739381  | -0.117 |
| cg25940248 | I  | 37 | 4 | 39448464  | KLB              | 0.54 | 0.0014   | 2.85345 | 0.59163779 | 0.474690188 | 0.117  |
| cg04085076 | II | 37 | 4 | 57547579  | HOPX;HOPX;HOPX;  | 0.42 | 0.02991  | 1.52413 | 0.46138788 | 0.344189907 | 0.117  |
| cg11293275 | II | 37 | 5 | 131543977 | P4HA2;P4HA2;P4H  | 0.5  | 0.00432  | 2.36443 | 0.27158823 | 0.388157898 | -0.117 |
| cg25140347 | II | 37 | 5 | 149303401 | PDE6A            | 0.42 | 0.02991  | 1.52413 | 0.823529   | 0.706858349 | 0.117  |
| cg15892650 | II | 37 | 5 | 150524635 | ANXA6;ANXA6      | 0.5  | 0.00432  | 2.36443 | 0.76618484 | 0.648972027 | 0.117  |
| cg12177334 | II | 37 | 5 | 176937350 | DOK3;DOK3;DOK3;  | 0.54 | 0.0014   | 2.85345 | 0.32428127 | 0.207728125 | 0.117  |
| cg18000306 | II | 37 | 6 | 288505    |                  | 0.46 | 0.01197  | 1.92207 | 0.65829986 | 0.775565927 | -0.117 |
| cg26336265 | II | 37 | 6 | 25042955  |                  | 0.46 | 0.01197  | 1.92207 | 0.43931543 | 0.321893111 | 0.117  |
| cg01505556 | II | 37 | 6 | 30174125  | TRIM26           | 0.46 | 0.01197  | 1.92207 | 0.5623608  | 0.445743384 | 0.117  |
| cg03280235 | II | 37 | 6 | 32158953  | PBX2;GPSM3       | 0.46 | 0.01197  | 1.92207 | 0.66350109 | 0.546577228 | 0.117  |
| cg21974506 | I  | 37 | 6 | 33141291  | COL11A2;COL11A2; | 0.42 | 0.02991  | 1.52413 | 0.66705481 | 0.549760324 | 0.117  |

|            |    |    |    |                               |      |          |         |            |             |        |
|------------|----|----|----|-------------------------------|------|----------|---------|------------|-------------|--------|
| cg11071155 | II | 37 | 6  | 157012049                     | 0.5  | 0.00432  | 2.36443 | 0.79807905 | 0.681100455 | 0.117  |
| cg18758976 | II | 37 | 6  | 158430311 SYNJ2               | 0.62 | 0.0001   | 3.98291 | 0.39771113 | 0.515164849 | -0.117 |
| cg07567256 | II | 37 | 6  | 163757048                     | 0.71 | 4.57E-06 | 5.34042 | 0.22216752 | 0.339564424 | -0.117 |
| cg00088688 | II | 37 | 6  | 167560504                     | 0.46 | 0.01197  | 1.92207 | 0.62683789 | 0.743358053 | -0.117 |
| cg05835726 | II | 37 | 7  | 27183861 HOXA5                | 0.46 | 0.01197  | 1.92207 | 0.69539446 | 0.812582907 | -0.117 |
| cg26283713 | II | 37 | 7  | 128375140                     | 0.62 | 0.0001   | 3.98291 | 0.71068714 | 0.827318097 | -0.117 |
| cg02049210 | II | 37 | 8  | 48647583 KIAA0146             | 0.5  | 0.00432  | 2.36443 | 0.142116   | 0.258736425 | -0.117 |
| cg11749792 | II | 37 | 8  | 124730091 ANXA13;ANXA13       | 0.5  | 0.00432  | 2.36443 | 0.72967041 | 0.846247207 | -0.117 |
| cg22581352 | II | 37 | 8  | 142219329                     | 0.54 | 0.0014   | 2.85345 | 0.37654539 | 0.493709841 | -0.117 |
| cg03924115 | II | 37 | 9  | 133768966 QRFP                | 0.5  | 0.00432  | 2.36443 | 0.55933808 | 0.676087634 | -0.117 |
| cg09098522 | II | 37 | 10 | 31435673                      | 0.46 | 0.01197  | 1.92207 | 0.29431868 | 0.411483571 | -0.117 |
| cg08889480 | II | 37 | 10 | 47746789 ANXA8L2              | 0.58 | 0.00041  | 3.39184 | 0.74738227 | 0.864380487 | -0.117 |
| cg00495658 | II | 37 | 10 | 48417904 GDF2                 | 0.46 | 0.01197  | 1.92207 | 0.69745311 | 0.580042352 | 0.117  |
| cg17535314 | II | 37 | 10 | 48435475 GDF10                | 0.5  | 0.00432  | 2.36443 | 0.74627221 | 0.629512144 | 0.117  |
| cg17664182 | II | 37 | 10 | 99696260 CRTAC1               | 0.42 | 0.02991  | 1.52413 | 0.77647055 | 0.659605199 | 0.117  |
| cg09405083 | II | 37 | 10 | 104536121 C10orf26;C10orf26   | 0.67 | 2.34E-05 | 4.63072 | 0.19556823 | 0.312504446 | -0.117 |
| cg18143317 | II | 37 | 11 | 2037124                       | 0.62 | 0.0001   | 3.98291 | 0.54714884 | 0.430174163 | 0.117  |
| cg08376310 | I  | 37 | 11 | 2858621 KCNQ1;KCNQ1           | 0.54 | 0.0014   | 2.85345 | 0.82366539 | 0.940545925 | -0.117 |
| cg23190089 | II | 37 | 11 | 2920209 SLC22A18AS;SLC22A18AS | 0.5  | 0.00432  | 2.36443 | 0.17997295 | 0.297314162 | -0.117 |
| cg11822932 | II | 37 | 11 | 33913716 LMO2;LMO2            | 0.42 | 0.02991  | 1.52413 | 0.25039392 | 0.367067455 | -0.117 |
| cg06429555 | II | 37 | 11 | 72542625                      | 0.5  | 0.00432  | 2.36443 | 0.50050099 | 0.617839998 | -0.117 |
| cg05705813 | II | 37 | 11 | 86383809 ME3;ME3;ME3          | 0.54 | 0.0014   | 2.85345 | 0.36810468 | 0.48478088  | -0.117 |
| cg08427067 | II | 37 | 11 | 95015466                      | 0.54 | 0.0014   | 2.85345 | 0.75136659 | 0.867888462 | -0.117 |
| cg19308663 | II | 37 | 11 | 118741387                     | 0.54 | 0.0014   | 2.85345 | 0.24096428 | 0.124087524 | 0.117  |
| cg22036538 | II | 37 | 12 | 6554051 CD27;CD27;LOC678      | 0.54 | 0.0014   | 2.85345 | 0.26348296 | 0.145989314 | 0.117  |
| cg07684519 | II | 37 | 12 | 29303184                      | 0.5  | 0.00432  | 2.36443 | 0.14238378 | 0.25972083  | -0.117 |
| cg16242629 | I  | 37 | 12 | 30354246                      | 0.42 | 0.02991  | 1.52413 | 0.26812416 | 0.384729147 | -0.117 |
| cg23815853 | II | 37 | 12 | 48147034 RAPGEF3;RAPGEF3;     | 0.42 | 0.02991  | 1.52413 | 0.69350171 | 0.810702754 | -0.117 |
| cg24821554 | II | 37 | 13 | 51639953 GUCY1B2              | 0.46 | 0.01197  | 1.92207 | 0.37900047 | 0.496433079 | -0.117 |
| cg07258507 | II | 37 | 14 | 23842125 IL25;IL25;IL25;IL25  | 0.54 | 0.0014   | 2.85345 | 0.56083914 | 0.443956368 | 0.117  |
| cg10199763 | II | 37 | 14 | 24458299 DHRS4L2              | 0.46 | 0.01197  | 1.92207 | 0.14198917 | 0.259082099 | -0.117 |
| cg13704629 | II | 37 | 14 | 73396469 DCAF4;DCAF4;DCAF4    | 0.62 | 0.0001   | 3.98291 | 0.51644659 | 0.633156038 | -0.117 |
| cg04913803 | II | 37 | 14 | 77510549                      | 0.54 | 0.0014   | 2.85345 | 0.6720405  | 0.789035061 | -0.117 |

|            |    |    |    |                           |      |          |         |            |             |        |
|------------|----|----|----|---------------------------|------|----------|---------|------------|-------------|--------|
| cg18091385 | II | 37 | 14 | 99502466                  | 0.54 | 0.0014   | 2.85345 | 0.34651501 | 0.463800547 | -0.117 |
| cg10142436 | II | 37 | 15 | 42209178 EHD4             | 0.58 | 0.00041  | 3.39184 | 0.17078412 | 0.287345727 | -0.117 |
| cg20507228 | II | 37 | 15 | 91460071 MAN2A2           | 0.42 | 0.02991  | 1.52413 | 0.51848744 | 0.635816805 | -0.117 |
| cg00658411 | II | 37 | 16 | 4467558 CORO7             | 0.54 | 0.0014   | 2.85345 | 0.60062004 | 0.717862321 | -0.117 |
| cg16660091 | II | 37 | 16 | 56995856 CETP;CETP        | 0.5  | 0.00432  | 2.36443 | 0.52197011 | 0.638879907 | -0.117 |
| cg16594273 | I  | 37 | 16 | 58131312                  | 0.67 | 2.34E-05 | 4.63072 | 0.35124363 | 0.234536349 | 0.117  |
| cg22381196 | II | 37 | 16 | 72041376 DHODH            | 0.46 | 0.01197  | 1.92207 | 0.82450626 | 0.94124905  | -0.117 |
| cg04016660 | II | 37 | 16 | 85075232 KIAA0513         | 0.42 | 0.02991  | 1.52413 | 0.72316849 | 0.840407334 | -0.117 |
| cg08472633 | II | 37 | 16 | 88907370 GALNS            | 0.42 | 0.02991  | 1.52413 | 0.62270936 | 0.740205102 | -0.117 |
| cg02431972 | II | 37 | 16 | 89023488 CBFA2T3          | 0.5  | 0.00432  | 2.36443 | 0.51672977 | 0.633654752 | -0.117 |
| cg06082883 | II | 37 | 16 | 89686744 DPEP1;DPEP1      | 0.42 | 0.02991  | 1.52413 | 0.67772667 | 0.560879685 | 0.117  |
| cg02635449 | II | 37 | 17 | 109926 RPH3AL             | 0.46 | 0.01197  | 1.92207 | 0.49654192 | 0.379955809 | 0.117  |
| cg02352716 | II | 37 | 17 | 1104805                   | 0.46 | 0.01197  | 1.92207 | 0.79656547 | 0.67935688  | 0.117  |
| cg14330293 | I  | 37 | 17 | 1374051 MYO1C;MYO1C;MY    | 0.67 | 2.34E-05 | 4.63072 | 0.59969647 | 0.716987338 | -0.117 |
| cg06255609 | II | 37 | 17 | 3493563 TRPV1;TRPV1;TRPV  | 0.46 | 0.01197  | 1.92207 | 0.68403704 | 0.567145211 | 0.117  |
| cg21509889 | II | 37 | 17 | 6683446 FBXO39            | 0.5  | 0.00432  | 2.36443 | 0.70988766 | 0.5926375   | 0.117  |
| cg19536664 | II | 37 | 17 | 6899085 ALOX12            | 0.46 | 0.01197  | 1.92207 | 0.67219598 | 0.789626966 | -0.117 |
| cg14072027 | II | 37 | 17 | 15301904                  | 0.5  | 0.00432  | 2.36443 | 0.18415355 | 0.301007661 | -0.117 |
| cg18748374 | II | 37 | 17 | 27482619 MYO18A;MYO18A    | 0.42 | 0.02991  | 1.52413 | 0.32156189 | 0.438553194 | -0.117 |
| cg20693334 | II | 37 | 17 | 46654330 HOXB4            | 0.54 | 0.0014   | 2.85345 | 0.2194881  | 0.336264933 | -0.117 |
| cg20614854 | II | 37 | 17 | 71331689 SDK2             | 0.46 | 0.01197  | 1.92207 | 0.65503839 | 0.537596118 | 0.117  |
| cg26263675 | II | 37 | 17 | 72743191 RAB37;RAB37;RAB3 | 0.54 | 0.0014   | 2.85345 | 0.20972093 | 0.326677072 | -0.117 |
| cg20338276 | I  | 37 | 17 | 73246585 GGA3;GGA3        | 0.5  | 0.00432  | 2.36443 | 0.72256143 | 0.605822187 | 0.117  |
| cg22652378 | II | 37 | 17 | 78533842 RPTOR;RPTOR      | 0.42 | 0.02991  | 1.52413 | 0.7261479  | 0.843102384 | -0.117 |
| cg16584393 | II | 37 | 18 | 14747888 ANKRD30B         | 0.54 | 0.0014   | 2.85345 | 0.32166587 | 0.438851789 | -0.117 |
| cg16151261 | I  | 37 | 18 | 75691297                  | 0.54 | 0.0014   | 2.85345 | 0.82686232 | 0.710148433 | 0.117  |
| cg03943674 | II | 37 | 18 | 77643329 KCNG2            | 0.5  | 0.00432  | 2.36443 | 0.71740664 | 0.834251219 | -0.117 |
| cg18465133 | I  | 37 | 19 | 2252282 JSRP1             | 0.58 | 0.00041  | 3.39184 | 0.13824302 | 0.255099362 | -0.117 |
| cg00513288 | II | 37 | 19 | 2358394                   | 0.58 | 0.00041  | 3.39184 | 0.50069628 | 0.383984508 | 0.117  |
| cg10340117 | II | 37 | 19 | 3984058 EEF2;SNORD37      | 0.42 | 0.02991  | 1.52413 | 0.75653203 | 0.639642017 | 0.117  |
| cg00479463 | I  | 37 | 19 | 33726786                  | 0.58 | 0.00041  | 3.39184 | 0.57688961 | 0.460326078 | 0.117  |
| cg02385820 | II | 37 | 19 | 39359726 RINL             | 0.54 | 0.0014   | 2.85345 | 0.58848052 | 0.471409531 | 0.117  |
| cg12362077 | II | 37 | 20 | 2081907 STK35             | 0.42 | 0.02991  | 1.52413 | 0.58841781 | 0.705193967 | -0.117 |

|            |    |    |    |           |                   |      |         |         |            |             |        |
|------------|----|----|----|-----------|-------------------|------|---------|---------|------------|-------------|--------|
| cg24484138 | II | 37 | 20 | 31070190  | C20orf112         | 0.54 | 0.0014  | 2.85345 | 0.23464963 | 0.351558939 | -0.117 |
| cg09727148 | II | 37 | 21 | 43560719  | UMODL1;UMODL1     | 0.42 | 0.02991 | 1.52413 | 0.5980641  | 0.481361617 | 0.117  |
| cg26722225 | II | 37 | 21 | 47710409  | C21orf57;C21orf57 | 0.5  | 0.00432 | 2.36443 | 0.84218647 | 0.724914748 | 0.117  |
| cg19343611 | I  | 37 | 22 | 28010528  |                   | 0.5  | 0.00432 | 2.36443 | 0.22192191 | 0.339181215 | -0.117 |
| cg17367078 | II | 37 | 22 | 35389501  |                   | 0.58 | 0.00041 | 3.39184 | 0.67809783 | 0.560944631 | 0.117  |
| cg02541592 | II | 37 | 22 | 45608686  | C22orf9;C22orf9   | 0.62 | 0.0001  | 3.98291 | 0.79289173 | 0.909435543 | -0.117 |
| cg20366239 | II | 37 | 22 | 50841775  | SAPS2             | 0.46 | 0.01197 | 1.92207 | 0.30124427 | 0.418233245 | -0.117 |
| cg09275693 | II | 37 | 1  | 3819354   | LOC100133612      | 0.62 | 0.0001  | 3.98291 | 0.81021779 | 0.694101585 | 0.116  |
| cg16023434 | II | 37 | 1  | 11395635  |                   | 0.42 | 0.02991 | 1.52413 | 0.68641283 | 0.569994905 | 0.116  |
| cg18229396 | II | 37 | 1  | 13845638  |                   | 0.54 | 0.0014  | 2.85345 | 0.70495095 | 0.589326195 | 0.116  |
| cg24875017 | I  | 37 | 1  | 17026258  | ESPNP             | 0.46 | 0.01197 | 1.92207 | 0.40956158 | 0.293649941 | 0.116  |
| cg01519464 | II | 37 | 1  | 24861818  | RCAN3             | 0.54 | 0.0014  | 2.85345 | 0.65873532 | 0.542451832 | 0.116  |
| cg24691891 | II | 37 | 1  | 33829934  | PHC2              | 0.42 | 0.02991 | 1.52413 | 0.75027609 | 0.634320605 | 0.116  |
| cg17139085 | II | 37 | 1  | 36787356  |                   | 0.5  | 0.00432 | 2.36443 | 0.46353673 | 0.579774642 | -0.116 |
| cg21785067 | II | 37 | 1  | 54587182  |                   | 0.54 | 0.0014  | 2.85345 | 0.20983889 | 0.325546799 | -0.116 |
| cg21536783 | II | 37 | 1  | 59041407  | TACSTD2;TACSTD2   | 0.42 | 0.02991 | 1.52413 | 0.68375291 | 0.800173906 | -0.116 |
| cg26422458 | I  | 37 | 1  | 79472452  | ELTD1;ELTD1       | 0.46 | 0.01197 | 1.92207 | 0.19930977 | 0.315761268 | -0.116 |
| cg13080606 | II | 37 | 1  | 110999462 | PROK1             | 0.62 | 0.0001  | 3.98291 | 0.80419386 | 0.688518201 | 0.116  |
| cg22706106 | II | 37 | 1  | 153607701 | C1orf77;S100A13   | 0.5  | 0.00432 | 2.36443 | 0.59496408 | 0.479310657 | 0.116  |
| cg25407979 | I  | 37 | 1  | 204256846 | PLEKHA6           | 0.46 | 0.01197 | 1.92207 | 0.1145073  | 0.23071001  | -0.116 |
| cg15152595 | II | 37 | 1  | 204972818 | NFASC;NFASC;NFAS  | 0.42 | 0.02991 | 1.52413 | 0.81283897 | 0.696987276 | 0.116  |
| cg24401487 | II | 37 | 1  | 230416880 | GALNT2            | 0.42 | 0.02991 | 1.52413 | 0.30188046 | 0.418186901 | -0.116 |
| cg11166453 | I  | 37 | 1  | 247681781 |                   | 0.42 | 0.02991 | 1.52413 | 0.649795   | 0.765390635 | -0.116 |
| cg08621773 | II | 37 | 2  | 25438675  |                   | 0.42 | 0.02991 | 1.52413 | 0.70939165 | 0.593015743 | 0.116  |
| cg13156207 | II | 37 | 2  | 28873060  |                   | 0.42 | 0.02991 | 1.52413 | 0.78678554 | 0.671162011 | 0.116  |
| cg19445690 | II | 37 | 2  | 74210890  |                   | 0.5  | 0.00432 | 2.36443 | 0.24475918 | 0.360336208 | -0.116 |
| cg20810222 | II | 37 | 2  | 109947649 | SH3RF3            | 0.46 | 0.01197 | 1.92207 | 0.1774263  | 0.293749358 | -0.116 |
| cg23499749 | I  | 37 | 2  | 113345365 | CHCHD5            | 0.5  | 0.00432 | 2.36443 | 0.75327301 | 0.869524337 | -0.116 |
| cg11612905 | II | 37 | 2  | 234359654 | DGKD;DGKD         | 0.46 | 0.01197 | 1.92207 | 0.72854983 | 0.844201875 | -0.116 |
| cg25921544 | II | 37 | 2  | 240040290 | HDAC4             | 0.5  | 0.00432 | 2.36443 | 0.69653359 | 0.812453275 | -0.116 |
| cg26092233 | I  | 37 | 2  | 240697636 |                   | 0.46 | 0.01197 | 1.92207 | 0.84520848 | 0.729197787 | 0.116  |
| cg06476685 | II | 37 | 2  | 241459638 | ANKMY1;ANKMY1     | 0.5  | 0.00432 | 2.36443 | 0.39717185 | 0.513507613 | -0.116 |
| cg26121234 | II | 37 | 3  | 13899618  | WNT7A             | 0.46 | 0.01197 | 1.92207 | 0.66119333 | 0.544948156 | 0.116  |

|            |    |    |    |                            |      |          |         |            |             |        |
|------------|----|----|----|----------------------------|------|----------|---------|------------|-------------|--------|
| cg15681239 | II | 37 | 3  | 38080203 DLEC1;DLEC1       | 0.5  | 0.00432  | 2.36443 | 0.27380195 | 0.389426885 | -0.116 |
| cg20203592 | II | 37 | 3  | 111591382 PHLDB2;PHLDB2;PH | 0.46 | 0.01197  | 1.92207 | 0.71816815 | 0.601681805 | 0.116  |
| cg25357706 | II | 37 | 3  | 123123576 ADCY5            | 0.5  | 0.00432  | 2.36443 | 0.69803086 | 0.582023752 | 0.116  |
| cg19497451 | II | 37 | 3  | 134331952 KY               | 0.46 | 0.01197  | 1.92207 | 0.70367378 | 0.587796325 | 0.116  |
| cg01610632 | II | 37 | 3  | 147127579 ZIC1;ZIC1        | 0.67 | 2.34E-05 | 4.63072 | 0.17120829 | 0.287275973 | -0.116 |
| cg27313776 | II | 37 | 4  | 146809012 ZNF827           | 0.5  | 0.00432  | 2.36443 | 0.77709019 | 0.660872687 | 0.116  |
| cg08347626 | II | 37 | 5  | 1850140                    | 0.54 | 0.0014   | 2.85345 | 0.36593877 | 0.482310691 | -0.116 |
| cg16230626 | I  | 37 | 5  | 124298608                  | 0.5  | 0.00432  | 2.36443 | 0.75966167 | 0.876107826 | -0.116 |
| cg18424208 | I  | 37 | 5  | 149546337 CDX1             | 0.42 | 0.02991  | 1.52413 | 0.79802327 | 0.682438804 | 0.116  |
| cg19228647 | II | 37 | 6  | 6901002                    | 0.5  | 0.00432  | 2.36443 | 0.18096514 | 0.29647743  | -0.116 |
| cg13534892 | I  | 37 | 6  | 30704998 FLOT1             | 0.5  | 0.00432  | 2.36443 | 0.70218269 | 0.586329961 | 0.116  |
| cg26695758 | I  | 37 | 6  | 32063607 TNXB              | 0.42 | 0.02991  | 1.52413 | 0.70803516 | 0.824393638 | -0.116 |
| cg20765522 | II | 37 | 6  | 32154715 PBX2              | 0.5  | 0.00432  | 2.36443 | 0.34216223 | 0.458365356 | -0.116 |
| cg16602097 | II | 37 | 6  | 32182013 NOTCH4            | 0.42 | 0.02991  | 1.52413 | 0.23078325 | 0.346721553 | -0.116 |
| cg06535156 | II | 37 | 6  | 155538055 TIAM2;TIAM2      | 0.42 | 0.02991  | 1.52413 | 0.50789519 | 0.624139742 | -0.116 |
| cg12002139 | II | 37 | 6  | 158478872 SYNJ2            | 0.42 | 0.02991  | 1.52413 | 0.60881768 | 0.724368335 | -0.116 |
| cg27186851 | II | 37 | 7  | 2566750 LFNG;LFNG;LFNG;LI  | 0.5  | 0.00432  | 2.36443 | 0.66633833 | 0.550678402 | 0.116  |
| cg12400790 | II | 37 | 7  | 2635181 IQCE;IQCE          | 0.42 | 0.02991  | 1.52413 | 0.67643342 | 0.560124363 | 0.116  |
| cg02916332 | II | 37 | 7  | 27183591 HOXA5             | 0.46 | 0.01197  | 1.92207 | 0.55944258 | 0.675768841 | -0.116 |
| cg14073571 | II | 37 | 7  | 158823179 VIPR2            | 0.62 | 0.0001   | 3.98291 | 0.24756056 | 0.363257688 | -0.116 |
| cg13876315 | II | 37 | 9  | 35650526 SIT1              | 0.62 | 0.0001   | 3.98291 | 0.58378432 | 0.467364866 | 0.116  |
| cg01422243 | II | 37 | 10 | 22725309                   | 0.54 | 0.0014   | 2.85345 | 0.58306659 | 0.467324075 | 0.116  |
| cg20286882 | II | 37 | 10 | 33432514                   | 0.42 | 0.02991  | 1.52413 | 0.70317078 | 0.587337859 | 0.116  |
| cg07128021 | II | 37 | 10 | 80824237 LOC283050;LOC283  | 0.67 | 2.34E-05 | 4.63072 | 0.51450452 | 0.398026905 | 0.116  |
| cg14374521 | I  | 37 | 10 | 124638874 FAM24B;LOC39981  | 0.42 | 0.02991  | 1.52413 | 0.21622827 | 0.099818075 | 0.116  |
| cg16872613 | II | 37 | 10 | 131260015                  | 0.5  | 0.00432  | 2.36443 | 0.74164409 | 0.625679629 | 0.116  |
| cg05457684 | II | 37 | 11 | 2919808 SLC22A18AS;SLC22   | 0.46 | 0.01197  | 1.92207 | 0.37561082 | 0.492106439 | -0.116 |
| cg18988498 | I  | 37 | 11 | 31824262 PAX6;PAX6;PAX6    | 0.42 | 0.02991  | 1.52413 | 0.1681106  | 0.283646617 | -0.116 |
| cg06059409 | II | 37 | 11 | 73036247 ARHGEF17          | 0.5  | 0.00432  | 2.36443 | 0.61406056 | 0.497800695 | 0.116  |
| cg06180869 | II | 37 | 11 | 76446769                   | 0.5  | 0.00432  | 2.36443 | 0.68123773 | 0.565180935 | 0.116  |
| cg12830752 | II | 37 | 11 | 79108069 ODZ4              | 0.5  | 0.00432  | 2.36443 | 0.57554272 | 0.459484093 | 0.116  |
| cg19624354 | II | 37 | 11 | 113113890 NCAM1;NCAM1;NC   | 0.5  | 0.00432  | 2.36443 | 0.36403101 | 0.480033895 | -0.116 |
| cg25577489 | II | 37 | 11 | 113950061 ZBTB16;ZBTB16    | 0.54 | 0.0014   | 2.85345 | 0.61350882 | 0.729572782 | -0.116 |

|            |    |    |    |                           |      |          |         |            |             |        |
|------------|----|----|----|---------------------------|------|----------|---------|------------|-------------|--------|
| cg03055065 | II | 37 | 12 | 4671310                   | 0.46 | 0.01197  | 1.92207 | 0.14413622 | 0.260379031 | -0.116 |
| cg07052231 | II | 37 | 12 | 7363540 PEX5;PEX5;PEX5;PE | 0.46 | 0.01197  | 1.92207 | 0.74694145 | 0.862646801 | -0.116 |
| cg15244101 | II | 37 | 12 | 49627624                  | 0.54 | 0.0014   | 2.85345 | 0.17126643 | 0.287449865 | -0.116 |
| cg08888956 | II | 37 | 12 | 86267839 NTS              | 0.46 | 0.01197  | 1.92207 | 0.49461289 | 0.610601611 | -0.116 |
| cg10996589 | II | 37 | 12 | 125017134 NCOR2;NCOR2     | 0.54 | 0.0014   | 2.85345 | 0.65219969 | 0.768437752 | -0.116 |
| cg17180284 | II | 37 | 13 | 31783983 B3GALTL          | 0.58 | 0.00041  | 3.39184 | 0.43768288 | 0.553531625 | -0.116 |
| cg05168229 | II | 37 | 13 | 45390049                  | 0.42 | 0.02991  | 1.52413 | 0.34132541 | 0.457571981 | -0.116 |
| cg00802237 | II | 37 | 14 | 94858066 SERPINA1;SERPINA | 0.54 | 0.0014   | 2.85345 | 0.68461456 | 0.800259179 | -0.116 |
| cg21141030 | II | 37 | 15 | 65576504 PARP16           | 0.58 | 0.00041  | 3.39184 | 0.80793903 | 0.923462605 | -0.116 |
| cg08765811 | I  | 37 | 15 | 77956125                  | 0.54 | 0.0014   | 2.85345 | 0.79761871 | 0.682012645 | 0.116  |
| cg09073799 | II | 37 | 15 | 82336202 MEX3B            | 0.46 | 0.01197  | 1.92207 | 0.63446084 | 0.749993604 | -0.116 |
| cg06876892 | I  | 37 | 16 | 833231 MSLNL              | 0.42 | 0.02991  | 1.52413 | 0.77414594 | 0.657982486 | 0.116  |
| cg06803853 | I  | 37 | 16 | 2234031 CASKIN1           | 0.46 | 0.01197  | 1.92207 | 0.86177677 | 0.74573218  | 0.116  |
| cg16548911 | II | 37 | 16 | 50347766 ADCY7            | 0.54 | 0.0014   | 2.85345 | 0.28018564 | 0.395805346 | -0.116 |
| cg02670686 | II | 37 | 16 | 57125674 CPNE2            | 0.5  | 0.00432  | 2.36443 | 0.1934088  | 0.309583624 | -0.116 |
| cg06204040 | I  | 37 | 16 | 89037481 CBFA2T3          | 0.5  | 0.00432  | 2.36443 | 0.94795003 | 0.832324645 | 0.116  |
| cg14375499 | II | 37 | 17 | 6899207 ALOX12            | 0.58 | 0.00041  | 3.39184 | 0.42575844 | 0.541609346 | -0.116 |
| cg19876689 | II | 37 | 17 | 44799518 NSF              | 0.75 | 7.61E-07 | 6.11857 | 0.59079458 | 0.707053761 | -0.116 |
| cg13698613 | II | 37 | 17 | 72518840 CD300LB          | 0.46 | 0.01197  | 1.92207 | 0.63524896 | 0.518955228 | 0.116  |
| cg12061649 | II | 37 | 17 | 72563547                  | 0.42 | 0.02991  | 1.52413 | 0.22258087 | 0.338257748 | -0.116 |
| cg03641032 | II | 37 | 17 | 78911768 RPTOR;RPTOR      | 0.75 | 7.61E-07 | 6.11857 | 0.70286705 | 0.819260201 | -0.116 |
| cg26739149 | I  | 37 | 17 | 78997350                  | 0.46 | 0.01197  | 1.92207 | 0.71509518 | 0.831302077 | -0.116 |
| cg21695089 | II | 37 | 17 | 79273418                  | 0.54 | 0.0014   | 2.85345 | 0.29761127 | 0.41326797  | -0.116 |
| cg25877299 | II | 37 | 17 | 80273290 CD7              | 0.71 | 4.57E-06 | 5.34042 | 0.48820578 | 0.603713672 | -0.116 |
| cg06784563 | I  | 37 | 18 | 77284509 NFATC1;NFATC1;NF | 0.62 | 0.0001   | 3.98291 | 0.50104989 | 0.385534258 | 0.116  |
| cg27374247 | II | 37 | 18 | 77555631                  | 0.54 | 0.0014   | 2.85345 | 0.64387007 | 0.759915218 | -0.116 |
| cg26615224 | I  | 37 | 19 | 1621124 TCF3;TCF3         | 0.42 | 0.02991  | 1.52413 | 0.81754069 | 0.701643446 | 0.116  |
| cg22603569 | II | 37 | 19 | 3388047 NFIC;NFIC         | 0.62 | 0.0001   | 3.98291 | 0.59908291 | 0.715534655 | -0.116 |
| cg11904429 | II | 37 | 19 | 6592554 CD70              | 0.46 | 0.01197  | 1.92207 | 0.77778657 | 0.662159921 | 0.116  |
| cg03649060 | II | 37 | 19 | 11665451 ELOF1            | 0.46 | 0.01197  | 1.92207 | 0.63381424 | 0.517350133 | 0.116  |
| cg00384707 | II | 37 | 19 | 51128576 SYT3;SYT3;SYT3   | 0.5  | 0.00432  | 2.36443 | 0.71968093 | 0.604067073 | 0.116  |
| cg15842722 | II | 37 | 20 | 23499644 CSTT             | 0.46 | 0.01197  | 1.92207 | 0.71811833 | 0.602081899 | 0.116  |
| cg13127741 | II | 37 | 20 | 31331821 COMMD7;COMMD     | 0.58 | 0.00041  | 3.39184 | 0.48329137 | 0.367369101 | 0.116  |

|            |    |    |    |           |                    |      |          |         |            |             |        |
|------------|----|----|----|-----------|--------------------|------|----------|---------|------------|-------------|--------|
| cg06604199 | II | 37 | 20 | 31331973  | COMMD7;COMMD       | 0.46 | 0.01197  | 1.92207 | 0.52772713 | 0.411984236 | 0.116  |
| cg17571207 | II | 37 | 22 | 33257641  | SYN3;SYN3;TIMP3;C  | 0.62 | 0.0001   | 3.98291 | 0.71295571 | 0.828736728 | -0.116 |
| cg26785823 | II | 37 | 1  | 2482001   | LOC115110          | 0.46 | 0.01197  | 1.92207 | 0.46545025 | 0.350383835 | 0.115  |
| cg12660813 | II | 37 | 1  | 3192343   | PRDM16;PRDM16      | 0.42 | 0.02991  | 1.52413 | 0.65325887 | 0.538659808 | 0.115  |
| cg22515654 | II | 37 | 1  | 10590672  | PEX14              | 0.42 | 0.02991  | 1.52413 | 0.44421377 | 0.559481234 | -0.115 |
| cg12900314 | II | 37 | 1  | 21755315  |                    | 0.42 | 0.02991  | 1.52413 | 0.59927374 | 0.713967767 | -0.115 |
| cg10965178 | I  | 37 | 1  | 43766752  | TIE1               | 0.5  | 0.00432  | 2.36443 | 0.66846352 | 0.783136241 | -0.115 |
| cg18235734 | I  | 37 | 1  | 91301731  |                    | 0.46 | 0.01197  | 1.92207 | 0.05721173 | 0.172310233 | -0.115 |
| cg11950860 | II | 37 | 1  | 152730231 | KPRP               | 0.62 | 0.0001   | 3.98291 | 0.69100287 | 0.576023122 | 0.115  |
| cg13423770 | II | 37 | 1  | 156338775 | RHBG;RHBG          | 0.71 | 4.57E-06 | 5.34042 | 0.45168543 | 0.567043113 | -0.115 |
| cg25259754 | II | 37 | 1  | 157670220 | FCRL3              | 0.5  | 0.00432  | 2.36443 | 0.71125851 | 0.596510086 | 0.115  |
| cg13109911 | II | 37 | 1  | 160178210 | PEA15              | 0.5  | 0.00432  | 2.36443 | 0.53775625 | 0.653034157 | -0.115 |
| cg06837040 | II | 37 | 1  | 180530353 |                    | 0.5  | 0.00432  | 2.36443 | 0.69441429 | 0.579227713 | 0.115  |
| cg19867250 | II | 37 | 1  | 225648715 |                    | 0.46 | 0.01197  | 1.92207 | 0.79656967 | 0.681213802 | 0.115  |
| cg10836509 | II | 37 | 1  | 226299603 |                    | 0.46 | 0.01197  | 1.92207 | 0.84263789 | 0.72809506  | 0.115  |
| cg25221919 | II | 37 | 1  | 234845770 |                    | 0.54 | 0.0014   | 2.85345 | 0.63939596 | 0.754536671 | -0.115 |
| cg25432792 | II | 37 | 2  | 23546167  |                    | 0.54 | 0.0014   | 2.85345 | 0.79062665 | 0.675675814 | 0.115  |
| cg21368063 | II | 37 | 2  | 27338538  | CGREF1;CGREF1;CC   | 0.46 | 0.01197  | 1.92207 | 0.7134757  | 0.598552307 | 0.115  |
| cg22363368 | II | 37 | 2  | 59126860  |                    | 0.42 | 0.02991  | 1.52413 | 0.77563034 | 0.661100341 | 0.115  |
| cg10536276 | II | 37 | 2  | 113956344 | PSD4;LOC440839     | 0.58 | 0.00041  | 3.39184 | 0.40848491 | 0.523009874 | -0.115 |
| cg25422880 | II | 37 | 2  | 135218333 | TMEM163            | 0.46 | 0.01197  | 1.92207 | 0.69082642 | 0.575886137 | 0.115  |
| cg22245446 | II | 37 | 2  | 218316451 | DIRC3              | 0.62 | 0.0001   | 3.98291 | 0.80026131 | 0.685452991 | 0.115  |
| cg00554192 | I  | 37 | 2  | 241612715 |                    | 0.46 | 0.01197  | 1.92207 | 0.63640152 | 0.751755477 | -0.115 |
| cg00697440 | II | 37 | 3  | 121795768 | CD86;CD86          | 0.42 | 0.02991  | 1.52413 | 0.79564193 | 0.680292537 | 0.115  |
| cg04509882 | II | 37 | 3  | 184038317 | EIF4G1;EIF4G1;EIF4 | 0.5  | 0.00432  | 2.36443 | 0.67547982 | 0.790045444 | -0.115 |
| cg03725404 | II | 37 | 4  | 9998017   | SLC2A9;SLC2A9      | 0.58 | 0.00041  | 3.39184 | 0.55143242 | 0.666825398 | -0.115 |
| cg06805348 | II | 37 | 4  | 37245195  | KIAA1239           | 0.46 | 0.01197  | 1.92207 | 0.46310648 | 0.578154    | -0.115 |
| cg07327178 | I  | 37 | 5  | 8457729   |                    | 0.5  | 0.00432  | 2.36443 | 0.44055223 | 0.325169592 | 0.115  |
| cg12516954 | II | 37 | 5  | 134714262 | H2AFY;H2AFY;H2AF   | 0.5  | 0.00432  | 2.36443 | 0.30013878 | 0.414920283 | -0.115 |
| cg16162590 | II | 37 | 5  | 159360802 | ADRA1B             | 0.46 | 0.01197  | 1.92207 | 0.6650303  | 0.549683286 | 0.115  |
| cg06149159 | II | 37 | 6  | 7975374   |                    | 0.42 | 0.02991  | 1.52413 | 0.15815103 | 0.272935832 | -0.115 |
| cg04274288 | II | 37 | 6  | 27648004  |                    | 0.62 | 0.0001   | 3.98291 | 0.1031292  | 0.218188018 | -0.115 |
| cg05952498 | II | 37 | 6  | 31545257  | TNF                | 0.42 | 0.02991  | 1.52413 | 0.79085477 | 0.675998494 | 0.115  |

|            |    |    |    |           |                         |      |         |         |            |             |        |
|------------|----|----|----|-----------|-------------------------|------|---------|---------|------------|-------------|--------|
| cg00533183 | II | 37 | 6  | 32810742  | PSMB8;PSMB8             | 0.58 | 0.00041 | 3.39184 | 0.66143572 | 0.546633289 | 0.115  |
| cg14132167 | II | 37 | 6  | 90661052  | BACH2;BACH2             | 0.58 | 0.00041 | 3.39184 | 0.70684577 | 0.821843836 | -0.115 |
| cg26618703 | II | 37 | 7  | 922962    | C7orf20                 | 0.42 | 0.02991 | 1.52413 | 0.51913532 | 0.634060833 | -0.115 |
| cg14983777 | I  | 37 | 7  | 1052392   | C7orf50;C7orf50;C7orf50 | 0.62 | 0.0001  | 3.98291 | 0.75570536 | 0.870293313 | -0.115 |
| cg18297960 | II | 37 | 7  | 1142765   | C7orf50;C7orf50;C7orf50 | 0.5  | 0.00432 | 2.36443 | 0.71412031 | 0.59944337  | 0.115  |
| cg21329649 | II | 37 | 7  | 1901840   | MAD1L1;MAD1L1;MAD1L1    | 0.46 | 0.01197 | 1.92207 | 0.62797041 | 0.512662413 | 0.115  |
| cg27151303 | II | 37 | 7  | 27184821  |                         | 0.5  | 0.00432 | 2.36443 | 0.51142368 | 0.626891236 | -0.115 |
| cg02538169 | II | 37 | 7  | 100287481 | GIGYF1                  | 0.5  | 0.00432 | 2.36443 | 0.77164812 | 0.656657503 | 0.115  |
| cg12469001 | II | 37 | 7  | 129650050 |                         | 0.46 | 0.01197 | 1.92207 | 0.57332184 | 0.458498136 | 0.115  |
| cg18825427 | II | 37 | 7  | 155079356 |                         | 0.62 | 0.0001  | 3.98291 | 0.56758521 | 0.682599009 | -0.115 |
| cg09027357 | II | 37 | 8  | 256911    |                         | 0.46 | 0.01197 | 1.92207 | 0.60226248 | 0.716835584 | -0.115 |
| cg10395101 | II | 37 | 8  | 6420858   | ANGPT2;ANGPT2;ANGPT2    | 0.54 | 0.0014  | 2.85345 | 0.59519218 | 0.710230318 | -0.115 |
| cg12097222 | I  | 37 | 8  | 16885000  | EFHA2                   | 0.42 | 0.02991 | 1.52413 | 0.07943768 | 0.194256474 | -0.115 |
| cg05313910 | II | 37 | 8  | 98361938  |                         | 0.46 | 0.01197 | 1.92207 | 0.78792403 | 0.672683449 | 0.115  |
| cg13837857 | II | 37 | 9  | 38672315  |                         | 0.58 | 0.00041 | 3.39184 | 0.62550299 | 0.740019959 | -0.115 |
| cg14085060 | I  | 37 | 9  | 107827215 |                         | 0.54 | 0.0014  | 2.85345 | 0.17634035 | 0.291730949 | -0.115 |
| cg14236758 | II | 37 | 9  | 137252129 | RXRA                    | 0.54 | 0.0014  | 2.85345 | 0.44007891 | 0.55495721  | -0.115 |
| cg14507845 | II | 37 | 9  | 137418069 |                         | 0.46 | 0.01197 | 1.92207 | 0.5943088  | 0.478934544 | 0.115  |
| cg23865980 | II | 37 | 10 | 80904376  | ZMIZ1                   | 0.58 | 0.00041 | 3.39184 | 0.19739954 | 0.312148388 | -0.115 |
| cg24249916 | II | 37 | 10 | 95326178  | GPR120                  | 0.5  | 0.00432 | 2.36443 | 0.59884779 | 0.713900774 | -0.115 |
| cg07402396 | II | 37 | 10 | 134360977 | INPP5A                  | 0.5  | 0.00432 | 2.36443 | 0.71676223 | 0.601804498 | 0.115  |
| cg10351829 | II | 37 | 10 | 134661550 |                         | 0.58 | 0.00041 | 3.39184 | 0.35046276 | 0.235237464 | 0.115  |
| cg03695260 | II | 37 | 10 | 134945452 |                         | 0.42 | 0.02991 | 1.52413 | 0.6521231  | 0.536757809 | 0.115  |
| cg14522803 | II | 37 | 11 | 818834    | PNPLA2                  | 0.46 | 0.01197 | 1.92207 | 0.52240564 | 0.636914613 | -0.115 |
| cg06964027 | II | 37 | 11 | 1073496   | MUC2                    | 0.62 | 0.0001  | 3.98291 | 0.2409162  | 0.355620868 | -0.115 |
| cg23500396 | II | 37 | 11 | 44896984  | TSPAN18                 | 0.5  | 0.00432 | 2.36443 | 0.76589186 | 0.881293895 | -0.115 |
| cg25324164 | II | 37 | 11 | 61598330  | FADS2                   | 0.58 | 0.00041 | 3.39184 | 0.19607744 | 0.311320202 | -0.115 |
| cg13924996 | I  | 37 | 11 | 67053829  | ADRBK1                  | 0.42 | 0.02991 | 1.52413 | 0.48292381 | 0.598341121 | -0.115 |
| cg05229803 | II | 37 | 11 | 94278407  | FUT4                    | 0.62 | 0.0001  | 3.98291 | 0.39189526 | 0.506632102 | -0.115 |
| cg07534554 | II | 37 | 11 | 111250338 | POU2AF1                 | 0.5  | 0.00432 | 2.36443 | 0.21003269 | 0.095290428 | 0.115  |
| cg19434937 | II | 37 | 12 | 7104184   | LPCAT3                  | 0.54 | 0.0014  | 2.85345 | 0.70153476 | 0.816145316 | -0.115 |
| cg05126095 | II | 37 | 12 | 50351980  | AQP2                    | 0.58 | 0.00041 | 3.39184 | 0.65114861 | 0.76643111  | -0.115 |
| cg00294538 | I  | 37 | 13 | 114062109 |                         | 0.54 | 0.0014  | 2.85345 | 0.73529544 | 0.620218384 | 0.115  |

|            |    |    |    |                               |      |         |         |            |             |        |
|------------|----|----|----|-------------------------------|------|---------|---------|------------|-------------|--------|
| cg05799596 | II | 37 | 13 | 114909333                     | 0.62 | 0.0001  | 3.98291 | 0.63657365 | 0.52140021  | 0.115  |
| cg23248887 | I  | 37 | 14 | 38679643 SSTR1                | 0.46 | 0.01197 | 1.92207 | 0.21356354 | 0.328113009 | -0.115 |
| cg16004738 | I  | 37 | 14 | 105155327 INF2;INF2;INF2      | 0.46 | 0.01197 | 1.92207 | 0.54969128 | 0.664306243 | -0.115 |
| cg24736933 | II | 37 | 15 | 40633294 C15orf52             | 0.42 | 0.02991 | 1.52413 | 0.25954058 | 0.374194873 | -0.115 |
| cg05897699 | II | 37 | 15 | 75146514 SCAMP2               | 0.54 | 0.0014  | 2.85345 | 0.70104491 | 0.58643324  | 0.115  |
| cg09939948 | II | 37 | 15 | 90548043 ZNF710               | 0.5  | 0.00432 | 2.36443 | 0.21200356 | 0.326944976 | -0.115 |
| cg07811054 | II | 37 | 15 | 97319911                      | 0.58 | 0.00041 | 3.39184 | 0.85465775 | 0.739340296 | 0.115  |
| cg03217729 | II | 37 | 16 | 11222890 CLEC16A              | 0.46 | 0.01197 | 1.92207 | 0.29548114 | 0.410524499 | -0.115 |
| cg06534313 | II | 37 | 16 | 16405520                      | 0.58 | 0.00041 | 3.39184 | 0.47265881 | 0.587506115 | -0.115 |
| cg27589742 | II | 37 | 16 | 85296503                      | 0.42 | 0.02991 | 1.52413 | 0.7639007  | 0.878973594 | -0.115 |
| cg09642825 | I  | 37 | 16 | 87416230 FBXO31;FBXO31        | 0.54 | 0.0014  | 2.85345 | 0.41340412 | 0.298649899 | 0.115  |
| cg16553026 | II | 37 | 16 | 88020079 BANP;BANP            | 0.58 | 0.00041 | 3.39184 | 0.70361384 | 0.818308939 | -0.115 |
| cg06959205 | I  | 37 | 16 | 88991917 CBFA2T3;CBFA2T3      | 0.42 | 0.02991 | 1.52413 | 0.42074171 | 0.306048475 | 0.115  |
| cg16024891 | I  | 37 | 17 | 2839082 RAP1GAP2;RAP1GA       | 0.46 | 0.01197 | 1.92207 | 0.18984423 | 0.304544585 | -0.115 |
| cg25921609 | I  | 37 | 17 | 8379225 MYH10                 | 0.54 | 0.0014  | 2.85345 | 0.68098527 | 0.795867299 | -0.115 |
| cg00192882 | II | 37 | 17 | 19291120 MFAP4                | 0.54 | 0.0014  | 2.85345 | 0.55608813 | 0.671121618 | -0.115 |
| cg08698159 | II | 37 | 17 | 27294743 SEZ6;SEZ6            | 0.42 | 0.02991 | 1.52413 | 0.15771362 | 0.272853077 | -0.115 |
| cg12882572 | II | 37 | 17 | 35851204 DUSP14               | 0.46 | 0.01197 | 1.92207 | 0.30450355 | 0.419545761 | -0.115 |
| cg04272820 | II | 37 | 17 | 38228538 THRA;THRA            | 0.46 | 0.01197 | 1.92207 | 0.46561327 | 0.580276552 | -0.115 |
| cg16276850 | II | 37 | 17 | 38498914 RARA;RARA;RARA;F     | 0.5  | 0.00432 | 2.36443 | 0.23643673 | 0.350956432 | -0.115 |
| cg23355492 | II | 37 | 17 | 45933593 SP6                  | 0.46 | 0.01197 | 1.92207 | 0.64536943 | 0.760022733 | -0.115 |
| cg26841048 | II | 37 | 17 | 46622454 HOXB2                | 0.5  | 0.00432 | 2.36443 | 0.49565205 | 0.610678132 | -0.115 |
| cg08832695 | II | 37 | 17 | 46676375 LOC404266;LOC404     | 0.62 | 0.0001  | 3.98291 | 0.48951771 | 0.604049545 | -0.115 |
| cg06407137 | II | 37 | 17 | 72527515 CD300LB              | 0.5  | 0.00432 | 2.36443 | 0.74102602 | 0.855905721 | -0.115 |
| cg26963090 | II | 37 | 17 | 76887989 TIMP2                | 0.46 | 0.01197 | 1.92207 | 0.48782463 | 0.603081873 | -0.115 |
| cg02878831 | II | 37 | 17 | 78847752 RPTOR;RPTOR          | 0.5  | 0.00432 | 2.36443 | 0.73513188 | 0.850114927 | -0.115 |
| cg21942893 | I  | 37 | 19 | 835499                        | 0.5  | 0.00432 | 2.36443 | 0.82261246 | 0.937542817 | -0.115 |
| cg22004069 | II | 37 | 19 | 5585648                       | 0.62 | 0.0001  | 3.98291 | 0.41314014 | 0.528084179 | -0.115 |
| cg02528768 | II | 37 | 19 | 18547358 ISYNA1;ISYNA1;ISYNA1 | 0.58 | 0.00041 | 3.39184 | 0.46365293 | 0.579034075 | -0.115 |
| cg05336188 | II | 37 | 19 | 18959506 UPF1                 | 0.46 | 0.01197 | 1.92207 | 0.32050612 | 0.435145764 | -0.115 |
| cg05209306 | II | 37 | 19 | 39899376 ZFP36                | 0.5  | 0.00432 | 2.36443 | 0.52861335 | 0.413798437 | 0.115  |
| cg06055845 | II | 37 | 19 | 40788787 MIR641;AKT2          | 0.54 | 0.0014  | 2.85345 | 0.74675619 | 0.631834041 | 0.115  |
| cg23058911 | II | 37 | 19 | 47812780 C5AR1                | 0.5  | 0.00432 | 2.36443 | 0.51407533 | 0.629443442 | -0.115 |

|            |    |    |    |           |                   |      |         |         |            |             |        |
|------------|----|----|----|-----------|-------------------|------|---------|---------|------------|-------------|--------|
| cg08861091 | II | 37 | 19 | 51891339  | LIM2;LIM2         | 0.42 | 0.02991 | 1.52413 | 0.73825548 | 0.623554942 | 0.115  |
| cg23953052 | II | 37 | 19 | 55586493  | EPS8L1            | 0.46 | 0.01197 | 1.92207 | 0.25097015 | 0.366308633 | -0.115 |
| cg19592472 | I  | 37 | 20 | 3052274   | OXT;OXT           | 0.5  | 0.00432 | 2.36443 | 0.41249171 | 0.527929798 | -0.115 |
| cg14921416 | I  | 37 | 20 | 3693158   |                   | 0.42 | 0.02991 | 1.52413 | 0.29969181 | 0.414410942 | -0.115 |
| cg17978727 | II | 37 | 20 | 4991028   | SLC23A2           | 0.46 | 0.01197 | 1.92207 | 0.40722613 | 0.521792885 | -0.115 |
| cg20039443 | I  | 37 | 20 | 50108912  | NFATC2;NFATC2;NF  | 0.5  | 0.00432 | 2.36443 | 0.42525311 | 0.54032527  | -0.115 |
| cg21279603 | II | 37 | 21 | 46963527  | SLC19A1           | 0.54 | 0.0014  | 2.85345 | 0.58013325 | 0.694825225 | -0.115 |
| cg18247179 | II | 37 | 22 | 19436867  | C22orf39;C22orf39 | 0.54 | 0.0014  | 2.85345 | 0.86169348 | 0.746860735 | 0.115  |
| cg21444731 | II | 37 | 22 | 24034126  | RGL4;LOC91316;RG  | 0.42 | 0.02991 | 1.52413 | 0.6496915  | 0.535037994 | 0.115  |
| cg25044876 | II | 37 | 22 | 43041146  | CYB5R3;CYB5R3;CY  | 0.42 | 0.02991 | 1.52413 | 0.3681245  | 0.483073751 | -0.115 |
| cg11344005 | II | 37 | 22 | 50987527  | KLHDC7B           | 0.58 | 0.00041 | 3.39184 | 0.41909885 | 0.303831683 | 0.115  |
| cg17023856 | II | 37 | 1  | 2036508   | PRKCZ;PRKCZ;PRKC  | 0.46 | 0.01197 | 1.92207 | 0.64402722 | 0.758414534 | -0.114 |
| cg24439334 | I  | 37 | 1  | 2345374   | PEX10;PEX10       | 0.46 | 0.01197 | 1.92207 | 0.77748587 | 0.663572267 | 0.114  |
| cg23040782 | II | 37 | 1  | 6762215   | DNAJC11           | 0.46 | 0.01197 | 1.92207 | 0.4498806  | 0.563659765 | -0.114 |
| cg27538859 | II | 37 | 1  | 15106700  | KIAA1026;KIAA1026 | 0.46 | 0.01197 | 1.92207 | 0.75941898 | 0.645688411 | 0.114  |
| cg12206846 | II | 37 | 1  | 19292493  |                   | 0.5  | 0.00432 | 2.36443 | 0.60742483 | 0.493594184 | 0.114  |
| cg20146241 | I  | 37 | 1  | 24861604  | RCAN3             | 0.54 | 0.0014  | 2.85345 | 0.18805715 | 0.073783699 | 0.114  |
| cg21909192 | II | 37 | 1  | 54692785  | SSBP3;SSBP3;SSBP3 | 0.54 | 0.0014  | 2.85345 | 0.61726889 | 0.731581455 | -0.114 |
| cg23715603 | II | 37 | 1  | 55278975  | C1orf177;C1orf177 | 0.46 | 0.01197 | 1.92207 | 0.70245818 | 0.588560036 | 0.114  |
| cg13229972 | II | 37 | 1  | 110335018 |                   | 0.46 | 0.01197 | 1.92207 | 0.26877357 | 0.382887762 | -0.114 |
| cg19718359 | II | 37 | 1  | 111035897 |                   | 0.58 | 0.00041 | 3.39184 | 0.76517745 | 0.879538874 | -0.114 |
| cg18146927 | II | 37 | 1  | 200835888 |                   | 0.5  | 0.00432 | 2.36443 | 0.67091801 | 0.557088066 | 0.114  |
| cg23683497 | II | 37 | 1  | 203192517 | CHIT1             | 0.5  | 0.00432 | 2.36443 | 0.72581594 | 0.612021603 | 0.114  |
| cg09259843 | II | 37 | 2  | 25452362  |                   | 0.46 | 0.01197 | 1.92207 | 0.52681872 | 0.640673145 | -0.114 |
| cg17786894 | II | 37 | 2  | 65131556  |                   | 0.5  | 0.00432 | 2.36443 | 0.59828706 | 0.71269513  | -0.114 |
| cg23262488 | II | 37 | 2  | 112468472 |                   | 0.42 | 0.02991 | 1.52413 | 0.2528254  | 0.366975653 | -0.114 |
| cg06867089 | II | 37 | 2  | 218867385 |                   | 0.46 | 0.01197 | 1.92207 | 0.69704406 | 0.810640131 | -0.114 |
| cg18664514 | II | 37 | 2  | 219851181 | FEV               | 0.54 | 0.0014  | 2.85345 | 0.43582032 | 0.321943757 | 0.114  |
| cg02253499 | II | 37 | 3  | 12602046  | MKRN2             | 0.46 | 0.01197 | 1.92207 | 0.77341277 | 0.659027996 | 0.114  |
| cg27310486 | II | 37 | 3  | 49200037  | CCDC71            | 0.54 | 0.0014  | 2.85345 | 0.51232664 | 0.625924698 | -0.114 |
| cg10748355 | II | 37 | 3  | 62861796  | CADPS;CADPS;CADP  | 0.5  | 0.00432 | 2.36443 | 0.15475616 | 0.268397359 | -0.114 |
| cg03457142 | II | 37 | 3  | 71804859  | EIF4E3;EIF4E3     | 0.58 | 0.00041 | 3.39184 | 0.522609   | 0.636905381 | -0.114 |
| cg09543255 | II | 37 | 3  | 170302640 | SLC7A14           | 0.58 | 0.00041 | 3.39184 | 0.1250792  | 0.238942566 | -0.114 |

|            |    |    |    |                            |      |         |         |            |             |        |
|------------|----|----|----|----------------------------|------|---------|---------|------------|-------------|--------|
| cg11134430 | II | 37 | 3  | 193987426                  | 0.5  | 0.00432 | 2.36443 | 0.24252145 | 0.356717454 | -0.114 |
| cg03296935 | II | 37 | 3  | 195946851 OSTalpha         | 0.46 | 0.01197 | 1.92207 | 0.34639128 | 0.45994139  | -0.114 |
| cg20296343 | II | 37 | 4  | 206442 ZNF876P             | 0.46 | 0.01197 | 1.92207 | 0.27455482 | 0.389030361 | -0.114 |
| cg01161042 | II | 37 | 4  | 2322052 ZFYVE28            | 0.54 | 0.0014  | 2.85345 | 0.72446629 | 0.609976178 | 0.114  |
| cg15885430 | II | 37 | 5  | 57069                      | 0.5  | 0.00432 | 2.36443 | 0.7744131  | 0.660116226 | 0.114  |
| cg03335624 | II | 37 | 5  | 73934942 ENC1              | 0.42 | 0.02991 | 1.52413 | 0.23430338 | 0.347965742 | -0.114 |
| cg20417024 | II | 37 | 5  | 76028950 F2R               | 0.46 | 0.01197 | 1.92207 | 0.83089054 | 0.717251904 | 0.114  |
| cg16246489 | II | 37 | 5  | 134735675 H2AFY;H2AFY;H2AF | 0.42 | 0.02991 | 1.52413 | 0.18248048 | 0.296090202 | -0.114 |
| cg03814957 | II | 37 | 5  | 149493099 CSF1R            | 0.5  | 0.00432 | 2.36443 | 0.67665559 | 0.791030874 | -0.114 |
| cg07475151 | II | 37 | 5  | 172382825 LOC100268168;LOC | 0.5  | 0.00432 | 2.36443 | 0.21858847 | 0.332850558 | -0.114 |
| cg27365342 | II | 37 | 6  | 12881417 PHACTR1           | 0.5  | 0.00432 | 2.36443 | 0.70858449 | 0.822145515 | -0.114 |
| cg27641532 | II | 37 | 6  | 27648317                   | 0.5  | 0.00432 | 2.36443 | 0.28361927 | 0.397806899 | -0.114 |
| cg12991385 | II | 37 | 6  | 29599259 GABBR1;GABBR1     | 0.62 | 0.0001  | 3.98291 | 0.53402667 | 0.647692476 | -0.114 |
| cg19712979 | II | 37 | 6  | 33173307 HSD17B8           | 0.5  | 0.00432 | 2.36443 | 0.6949124  | 0.580942811 | 0.114  |
| cg14375205 | II | 37 | 6  | 36618002                   | 0.5  | 0.00432 | 2.36443 | 0.56233613 | 0.676368109 | -0.114 |
| cg15496866 | II | 37 | 6  | 40491590 LRFN2             | 0.46 | 0.01197 | 1.92207 | 0.806036   | 0.69203323  | 0.114  |
| cg01055696 | I  | 37 | 6  | 164255524                  | 0.46 | 0.01197 | 1.92207 | 0.70900936 | 0.823020082 | -0.114 |
| cg04650322 | II | 37 | 7  | 119499                     | 0.62 | 0.0001  | 3.98291 | 0.30518279 | 0.419669281 | -0.114 |
| cg21920560 | II | 37 | 7  | 1138716 C7orf50;C7orf50;C7 | 0.46 | 0.01197 | 1.92207 | 0.57042306 | 0.456089273 | 0.114  |
| cg26402169 | I  | 37 | 7  | 1883139 MAD1L1;MAD1L1;M    | 0.54 | 0.0014  | 2.85345 | 0.66501328 | 0.551241303 | 0.114  |
| cg20297638 | II | 37 | 7  | 2563670 LFNG;LFNG;LFNG;LI  | 0.54 | 0.0014  | 2.85345 | 0.63895121 | 0.753282987 | -0.114 |
| cg10042478 | II | 37 | 7  | 48009556 HUS1              | 0.54 | 0.0014  | 2.85345 | 0.5291708  | 0.643609033 | -0.114 |
| cg18952796 | I  | 37 | 7  | 98246633 NPTX2;NPTX2       | 0.42 | 0.02991 | 1.52413 | 0.03888484 | 0.152806413 | -0.114 |
| cg02564523 | II | 37 | 7  | 102073539 ORAI2;ORAI2      | 0.5  | 0.00432 | 2.36443 | 0.334575   | 0.220806565 | 0.114  |
| cg21932452 | II | 37 | 7  | 150702471 NOS3             | 0.62 | 0.0001  | 3.98291 | 0.60571848 | 0.719604965 | -0.114 |
| cg26161004 | II | 37 | 8  | 11413186 BLK               | 0.46 | 0.01197 | 1.92207 | 0.4364771  | 0.550266253 | -0.114 |
| cg05486260 | II | 37 | 8  | 139206451 FAM135B          | 0.5  | 0.00432 | 2.36443 | 0.65027103 | 0.764279266 | -0.114 |
| cg00021855 | II | 37 | 8  | 144690956 PYCRL            | 0.42 | 0.02991 | 1.52413 | 0.54588465 | 0.431569087 | 0.114  |
| cg20633213 | II | 37 | 10 | 25183825 PRTFDC1           | 0.42 | 0.02991 | 1.52413 | 0.70232256 | 0.588214971 | 0.114  |
| cg26132114 | II | 37 | 10 | 44223934                   | 0.42 | 0.02991 | 1.52413 | 0.59773793 | 0.712027439 | -0.114 |
| cg00928816 | II | 37 | 10 | 63809098 ARID5B            | 0.46 | 0.01197 | 1.92207 | 0.73484252 | 0.620585649 | 0.114  |
| cg07630274 | II | 37 | 10 | 71583235 COL13A1;COL13A1;  | 0.54 | 0.0014  | 2.85345 | 0.81685543 | 0.703179921 | 0.114  |
| cg11633461 | II | 37 | 10 | 73534338 C10orf54;CDH23    | 0.42 | 0.02991 | 1.52413 | 0.40617845 | 0.519726088 | -0.114 |

|            |    |    |    |           |                   |      |          |         |            |             |        |
|------------|----|----|----|-----------|-------------------|------|----------|---------|------------|-------------|--------|
| cg17485681 | I  | 37 | 10 | 73565625  | CDH23             | 0.54 | 0.0014   | 2.85345 | 0.64055483 | 0.754343176 | -0.114 |
| cg20205477 | I  | 37 | 10 | 74113178  | DNAJB12;DNAJB12   | 0.46 | 0.01197  | 1.92207 | 0.79466124 | 0.909040936 | -0.114 |
| cg01481646 | II | 37 | 10 | 82217548  | TSPAN14;TSPAN14   | 0.46 | 0.01197  | 1.92207 | 0.41913217 | 0.533468466 | -0.114 |
| cg00167275 | I  | 37 | 10 | 88854588  | FAM35A;GLUD1;GL   | 0.46 | 0.01197  | 1.92207 | 0.21921056 | 0.105522543 | 0.114  |
| cg03628800 | II | 37 | 10 | 129702726 |                   | 0.5  | 0.00432  | 2.36443 | 0.68702931 | 0.573267418 | 0.114  |
| cg06354543 | II | 37 | 10 | 130376572 |                   | 0.42 | 0.02991  | 1.52413 | 0.80227629 | 0.688115478 | 0.114  |
| cg06715410 | II | 37 | 10 | 134407912 | INPP5A            | 0.5  | 0.00432  | 2.36443 | 0.65185561 | 0.53786978  | 0.114  |
| cg19025811 | I  | 37 | 11 | 2206157   |                   | 0.54 | 0.0014   | 2.85345 | 0.71358801 | 0.82782525  | -0.114 |
| cg25754143 | II | 37 | 11 | 2445316   | TRPM5             | 0.54 | 0.0014   | 2.85345 | 0.70315424 | 0.589369827 | 0.114  |
| cg03158561 | II | 37 | 11 | 8705959   | RPL27A;SNORA45    | 0.46 | 0.01197  | 1.92207 | 0.62430917 | 0.510807252 | 0.114  |
| cg21741081 | II | 37 | 11 | 60634606  | ZP1               | 0.46 | 0.01197  | 1.92207 | 0.77106575 | 0.656860053 | 0.114  |
| cg23917844 | I  | 37 | 11 | 61314901  | SYT7              | 0.46 | 0.01197  | 1.92207 | 0.81128074 | 0.696907665 | 0.114  |
| cg10859442 | II | 37 | 11 | 73716367  | UCP3;UCP3         | 0.46 | 0.01197  | 1.92207 | 0.76299408 | 0.648567314 | 0.114  |
| cg14883291 | II | 37 | 11 | 86383761  | ME3;ME3;ME3       | 0.54 | 0.0014   | 2.85345 | 0.25392997 | 0.36750616  | -0.114 |
| cg03970229 | II | 37 | 11 | 92702507  | MTNR1B            | 0.71 | 4.57E-06 | 5.34042 | 0.40802345 | 0.521579396 | -0.114 |
| cg07188648 | II | 37 | 11 | 111402694 | C11orf88;C11orf88 | 0.46 | 0.01197  | 1.92207 | 0.26773196 | 0.381239815 | -0.114 |
| cg12961889 | I  | 37 | 11 | 113749001 |                   | 0.58 | 0.00041  | 3.39184 | 0.64238574 | 0.528424636 | 0.114  |
| cg12368752 | II | 37 | 11 | 117800233 | TMPRSS13          | 0.54 | 0.0014   | 2.85345 | 0.54527576 | 0.659613428 | -0.114 |
| cg13019868 | II | 37 | 11 | 128694101 |                   | 0.5  | 0.00432  | 2.36443 | 0.45132084 | 0.565545778 | -0.114 |
| cg22777668 | II | 37 | 12 | 6881303   | LAG3              | 0.54 | 0.0014   | 2.85345 | 0.24878441 | 0.363239854 | -0.114 |
| cg19115204 | II | 37 | 12 | 64782908  | C12orf56;C12orf56 | 0.54 | 0.0014   | 2.85345 | 0.81758426 | 0.703728102 | 0.114  |
| cg11265839 | II | 37 | 12 | 96643565  | ELK3              | 0.42 | 0.02991  | 1.52413 | 0.52181154 | 0.636275312 | -0.114 |
| cg16671238 | II | 37 | 13 | 20987145  | CRYL1             | 0.5  | 0.00432  | 2.36443 | 0.47473446 | 0.588567195 | -0.114 |
| cg01004063 | II | 37 | 14 | 88606476  |                   | 0.5  | 0.00432  | 2.36443 | 0.49295645 | 0.378657304 | 0.114  |
| cg25132241 | II | 37 | 14 | 92396859  | FBLN5             | 0.54 | 0.0014   | 2.85345 | 0.68202769 | 0.796444845 | -0.114 |
| cg14290450 | II | 37 | 14 | 100614523 | DEGS2             | 0.46 | 0.01197  | 1.92207 | 0.82229712 | 0.708491019 | 0.114  |
| cg26216433 | II | 37 | 14 | 104346591 |                   | 0.58 | 0.00041  | 3.39184 | 0.19633005 | 0.30993644  | -0.114 |
| cg02342791 | II | 37 | 15 | 31508943  |                   | 0.46 | 0.01197  | 1.92207 | 0.35496172 | 0.468880081 | -0.114 |
| cg01042641 | I  | 37 | 16 | 1575979   | IFT140            | 0.58 | 0.00041  | 3.39184 | 0.61340246 | 0.499848683 | 0.114  |
| cg03163545 | II | 37 | 16 | 1593415   | IFT140;TMEM204    | 0.58 | 0.00041  | 3.39184 | 0.21663921 | 0.330289705 | -0.114 |
| cg01232511 | I  | 37 | 16 | 2867446   | PRSS21;PRSS21;PR  | 0.5  | 0.00432  | 2.36443 | 0.63168109 | 0.74615815  | -0.114 |
| cg03356595 | I  | 37 | 16 | 51187807  |                   | 0.46 | 0.01197  | 1.92207 | 0.11646592 | 0.229991233 | -0.114 |
| cg16471830 | II | 37 | 16 | 66400569  | CDH5;CDH5         | 0.54 | 0.0014   | 2.85345 | 0.29404746 | 0.408372469 | -0.114 |

|            |    |    |    |                            |      |          |         |            |             |        |
|------------|----|----|----|----------------------------|------|----------|---------|------------|-------------|--------|
| cg08080174 | I  | 37 | 16 | 72992580 ZFH3;ZFHX3        | 0.54 | 0.0014   | 2.85345 | 0.73720447 | 0.850980424 | -0.114 |
| cg06389950 | II | 37 | 16 | 75240536 CTRB2             | 0.42 | 0.02991  | 1.52413 | 0.66251582 | 0.548515243 | 0.114  |
| cg26947831 | I  | 37 | 16 | 86018811                   | 0.5  | 0.00432  | 2.36443 | 0.41032474 | 0.523846638 | -0.114 |
| cg00270654 | I  | 37 | 16 | 87735724 LOC100129637      | 0.54 | 0.0014   | 2.85345 | 0.78409778 | 0.670079423 | 0.114  |
| cg04032292 | II | 37 | 16 | 88973054 CBFA2T3;CBFA2T3   | 0.5  | 0.00432  | 2.36443 | 0.39507795 | 0.509444889 | -0.114 |
| cg04042333 | I  | 37 | 17 | 1104665                    | 0.62 | 0.0001   | 3.98291 | 0.86389684 | 0.749746829 | 0.114  |
| cg17933764 | II | 37 | 17 | 27069671 TRAF4;NEK8        | 0.42 | 0.02991  | 1.52413 | 0.66930165 | 0.555621907 | 0.114  |
| cg07146073 | I  | 37 | 17 | 29852668 RAB11FIP4         | 0.46 | 0.01197  | 1.92207 | 0.73675503 | 0.622551011 | 0.114  |
| cg25135457 | I  | 37 | 17 | 40715244 COASY;COASY;COA   | 0.42 | 0.02991  | 1.52413 | 0.80845439 | 0.694943565 | 0.114  |
| cg04703951 | I  | 37 | 17 | 43578652                   | 0.71 | 4.57E-06 | 5.34042 | 0.62964976 | 0.516024088 | 0.114  |
| cg01521220 | II | 37 | 17 | 46233799 MIR1203;SKAP1;SK  | 0.42 | 0.02991  | 1.52413 | 0.19121625 | 0.305103866 | -0.114 |
| cg25255850 | II | 37 | 17 | 46625332                   | 0.71 | 4.57E-06 | 5.34042 | 0.24964587 | 0.36331189  | -0.114 |
| cg19710451 | II | 37 | 17 | 46654202 HOXB4             | 0.46 | 0.01197  | 1.92207 | 0.18401427 | 0.29829084  | -0.114 |
| cg10588962 | II | 37 | 17 | 46667587 LOC404266;LOC404  | 0.5  | 0.00432  | 2.36443 | 0.11451033 | 0.228546294 | -0.114 |
| cg03717570 | I  | 37 | 17 | 73316496 GRB2;GRB2         | 0.42 | 0.02991  | 1.52413 | 0.92615845 | 0.812107332 | 0.114  |
| cg10053073 | II | 37 | 17 | 73623182 RECQL5            | 0.46 | 0.01197  | 1.92207 | 0.4677403  | 0.353615316 | 0.114  |
| cg08837215 | II | 37 | 17 | 74443080 UBE2O             | 0.5  | 0.00432  | 2.36443 | 0.71539521 | 0.829054269 | -0.114 |
| cg26623554 | II | 37 | 17 | 79984422 LRRC45            | 0.5  | 0.00432  | 2.36443 | 0.53201268 | 0.645825565 | -0.114 |
| cg15727507 | II | 37 | 17 | 80981575 B3GNTL1           | 0.54 | 0.0014   | 2.85345 | 0.53936164 | 0.653180716 | -0.114 |
| cg15439862 | II | 37 | 18 | 28622593 DSC3;DSC3         | 0.54 | 0.0014   | 2.85345 | 0.21567223 | 0.329600131 | -0.114 |
| cg24299136 | I  | 37 | 19 | 2511707 GNG7               | 0.42 | 0.02991  | 1.52413 | 0.86068971 | 0.747095149 | 0.114  |
| cg25597797 | II | 37 | 19 | 3589762 GIPC3              | 0.42 | 0.02991  | 1.52413 | 0.74269244 | 0.629048293 | 0.114  |
| cg08315613 | II | 37 | 19 | 11074303 SMARCA4;SMARCA    | 0.46 | 0.01197  | 1.92207 | 0.61282825 | 0.499003487 | 0.114  |
| cg24084564 | II | 37 | 19 | 39892799                   | 0.42 | 0.02991  | 1.52413 | 0.62345748 | 0.50956056  | 0.114  |
| cg10170269 | II | 37 | 20 | 62256006 GMEB2             | 0.5  | 0.00432  | 2.36443 | 0.77273102 | 0.886467191 | -0.114 |
| cg16431978 | II | 37 | 21 | 31797932 KRTAP13-3         | 0.58 | 0.00041  | 3.39184 | 0.75247744 | 0.638712936 | 0.114  |
| cg23122901 | II | 37 | 22 | 19880135 TXNRD2            | 0.62 | 0.0001   | 3.98291 | 0.43270096 | 0.319039134 | 0.114  |
| cg20339720 | I  | 37 | 22 | 45072491 PRR5;PRR5;PRR5;PI | 0.5  | 0.00432  | 2.36443 | 0.20550212 | 0.31969976  | -0.114 |
| cg23346237 | II | 37 | 22 | 46685655 TTC38             | 0.46 | 0.01197  | 1.92207 | 0.72155428 | 0.607677349 | 0.114  |
| cg12705326 | II | 37 | 1  | 6158691 KCNAB2;KCNAB2      | 0.58 | 0.00041  | 3.39184 | 0.74698655 | 0.860353935 | -0.113 |
| cg02117102 | II | 37 | 1  | 22210229 HSPG2             | 0.46 | 0.01197  | 1.92207 | 0.67038675 | 0.557073538 | 0.113  |
| cg19743891 | II | 37 | 1  | 26644573 UBXN11;UBXN11;C   | 0.58 | 0.00041  | 3.39184 | 0.18678695 | 0.074156486 | 0.113  |
| cg12627726 | II | 37 | 1  | 41290409 KCNQ4;KCNQ4       | 0.42 | 0.02991  | 1.52413 | 0.66537592 | 0.552446962 | 0.113  |

|            |    |    |   |                            |      |          |         |            |             |        |
|------------|----|----|---|----------------------------|------|----------|---------|------------|-------------|--------|
| cg01048810 | II | 37 | 1 | 45142815 C1orf228          | 0.54 | 0.0014   | 2.85345 | 0.46295105 | 0.575882362 | -0.113 |
| cg05132925 | II | 37 | 1 | 110438827                  | 0.58 | 0.00041  | 3.39184 | 0.40279231 | 0.516241214 | -0.113 |
| cg19627034 | II | 37 | 1 | 110476668                  | 0.46 | 0.01197  | 1.92207 | 0.2349911  | 0.347844922 | -0.113 |
| cg16488065 | II | 37 | 1 | 204656750                  | 0.58 | 0.00041  | 3.39184 | 0.79486759 | 0.682070786 | 0.113  |
| cg14284394 | II | 37 | 1 | 206947477                  | 0.46 | 0.01197  | 1.92207 | 0.59305586 | 0.706328244 | -0.113 |
| cg04304121 | II | 37 | 2 | 29236134 FAM179A           | 0.54 | 0.0014   | 2.85345 | 0.40014431 | 0.513611165 | -0.113 |
| cg13576290 | II | 37 | 2 | 29256737 FAM179A           | 0.5  | 0.00432  | 2.36443 | 0.6754297  | 0.788776631 | -0.113 |
| cg16240816 | II | 37 | 2 | 65861662                   | 0.46 | 0.01197  | 1.92207 | 0.72251952 | 0.609387275 | 0.113  |
| cg12391643 | II | 37 | 2 | 85316997                   | 0.42 | 0.02991  | 1.52413 | 0.71781631 | 0.604390472 | 0.113  |
| cg26874229 | I  | 37 | 2 | 105853672                  | 0.42 | 0.02991  | 1.52413 | 0.58849125 | 0.475169924 | 0.113  |
| cg07484739 | II | 37 | 2 | 177356020                  | 0.42 | 0.02991  | 1.52413 | 0.53759153 | 0.424519778 | 0.113  |
| cg19040077 | II | 37 | 2 | 242702749 D2HGDH           | 0.46 | 0.01197  | 1.92207 | 0.48710514 | 0.599958952 | -0.113 |
| cg20850016 | II | 37 | 3 | 5165254 ARL8B              | 0.46 | 0.01197  | 1.92207 | 0.14084197 | 0.253779386 | -0.113 |
| cg17183531 | II | 37 | 3 | 48603978 COL7A1            | 0.58 | 0.00041  | 3.39184 | 0.68819096 | 0.800951464 | -0.113 |
| cg14184400 | II | 37 | 3 | 49460057 AMT;AMT;AMT;NIC   | 0.46 | 0.01197  | 1.92207 | 0.37435381 | 0.487727534 | -0.113 |
| cg11932158 | II | 37 | 3 | 155422129 PLCH1            | 0.54 | 0.0014   | 2.85345 | 0.22323629 | 0.336008834 | -0.113 |
| cg10461878 | II | 37 | 3 | 158904717 IQCJ;IQCJ        | 0.46 | 0.01197  | 1.92207 | 0.70151871 | 0.58805892  | 0.113  |
| cg04252044 | II | 37 | 3 | 188664747                  | 0.67 | 2.34E-05 | 4.63072 | 0.78126177 | 0.894522984 | -0.113 |
| cg03891268 | I  | 37 | 3 | 195920019                  | 0.5  | 0.00432  | 2.36443 | 0.86723356 | 0.753925921 | 0.113  |
| cg15652666 | I  | 37 | 4 | 3487436 DOK7;DOK7          | 0.46 | 0.01197  | 1.92207 | 0.39269755 | 0.279879614 | 0.113  |
| cg21186966 | II | 37 | 4 | 5401430 STK32B             | 0.42 | 0.02991  | 1.52413 | 0.71352131 | 0.600773235 | 0.113  |
| cg08528970 | II | 37 | 4 | 76640579                   | 0.54 | 0.0014   | 2.85345 | 0.20339646 | 0.316458621 | -0.113 |
| cg04425005 | II | 37 | 4 | 146783253 ZNF827           | 0.46 | 0.01197  | 1.92207 | 0.74643123 | 0.859669868 | -0.113 |
| cg00329411 | II | 37 | 5 | 55881858                   | 0.46 | 0.01197  | 1.92207 | 0.56809398 | 0.681481572 | -0.113 |
| cg26549701 | II | 37 | 5 | 72599503                   | 0.5  | 0.00432  | 2.36443 | 0.18584726 | 0.298756001 | -0.113 |
| cg10949007 | II | 37 | 5 | 95159614 GLRX;GLRX         | 0.5  | 0.00432  | 2.36443 | 0.15744317 | 0.270542319 | -0.113 |
| cg06003656 | II | 37 | 5 | 166405676                  | 0.5  | 0.00432  | 2.36443 | 0.1732123  | 0.285920726 | -0.113 |
| cg27294324 | II | 37 | 5 | 169070065 DOCK2            | 0.5  | 0.00432  | 2.36443 | 0.77512593 | 0.888024679 | -0.113 |
| cg27063969 | II | 37 | 5 | 169133966 DOCK2            | 0.5  | 0.00432  | 2.36443 | 0.78934533 | 0.675993985 | 0.113  |
| cg13054640 | II | 37 | 6 | 30647148 KIAA1949;KIAA1949 | 0.62 | 0.0001   | 3.98291 | 0.41989894 | 0.306969802 | 0.113  |
| cg04536765 | II | 37 | 6 | 31621761 BAT3;BAT3;BAT3    | 0.58 | 0.00041  | 3.39184 | 0.72803247 | 0.840946509 | -0.113 |
| cg22878489 | I  | 37 | 6 | 33245701 B3GALT4           | 0.42 | 0.02991  | 1.52413 | 0.51032435 | 0.397270451 | 0.113  |
| cg11075561 | II | 37 | 6 | 36088380                   | 0.54 | 0.0014   | 2.85345 | 0.69259687 | 0.579770877 | 0.113  |

|            |    |    |    |                                  |      |         |         |            |             |        |
|------------|----|----|----|----------------------------------|------|---------|---------|------------|-------------|--------|
| cg27158519 | II | 37 | 6  | 113580203                        | 0.5  | 0.00432 | 2.36443 | 0.82155023 | 0.708546593 | 0.113  |
| cg03392753 | II | 37 | 7  | 1005576 COX19                    | 0.42 | 0.02991 | 1.52413 | 0.14011076 | 0.253166023 | -0.113 |
| cg07131210 | I  | 37 | 7  | 1025825 CYP2W1                   | 0.54 | 0.0014  | 2.85345 | 0.66710585 | 0.779929183 | -0.113 |
| cg19254152 | II | 37 | 7  | 1083473 C7orf50;C7orf50;C7orf50  | 0.54 | 0.0014  | 2.85345 | 0.23439228 | 0.347030504 | -0.113 |
| cg00083596 | II | 37 | 7  | 3996856 SDK1                     | 0.46 | 0.01197 | 1.92207 | 0.83538907 | 0.722855422 | 0.113  |
| cg09022230 | II | 37 | 7  | 5457225 TNRC18                   | 0.5  | 0.00432 | 2.36443 | 0.74745602 | 0.860245671 | -0.113 |
| cg12127159 | II | 37 | 7  | 33809972                         | 0.54 | 0.0014  | 2.85345 | 0.68708592 | 0.574288924 | 0.113  |
| cg00260937 | II | 37 | 7  | 128520193 KCP                    | 0.42 | 0.02991 | 1.52413 | 0.30830854 | 0.421421775 | -0.113 |
| cg03059073 | II | 37 | 7  | 150130708                        | 0.46 | 0.01197 | 1.92207 | 0.16104976 | 0.274288628 | -0.113 |
| cg17112266 | II | 37 | 7  | 150737198 ABCB8                  | 0.54 | 0.0014  | 2.85345 | 0.33815351 | 0.451110453 | -0.113 |
| cg20514973 | II | 37 | 8  | 102387937                        | 0.54 | 0.0014  | 2.85345 | 0.7105959  | 0.823889833 | -0.113 |
| cg24804707 | II | 37 | 8  | 134094173 TG;SLA;SLA             | 0.42 | 0.02991 | 1.52413 | 0.31775902 | 0.430913018 | -0.113 |
| cg13474450 | II | 37 | 8  | 142222685 SLC45A4                | 0.5  | 0.00432 | 2.36443 | 0.74977667 | 0.862375068 | -0.113 |
| cg24891660 | I  | 37 | 8  | 145003653 PLEC1;PLEC1;PLEC1      | 0.58 | 0.00041 | 3.39184 | 0.55978002 | 0.446917554 | 0.113  |
| cg14571284 | II | 37 | 9  | 130516077 SH2D3C;SH2D3C;SH2D3C   | 0.5  | 0.00432 | 2.36443 | 0.72134997 | 0.834810324 | -0.113 |
| cg13435263 | I  | 37 | 9  | 139143522                        | 0.58 | 0.00041 | 3.39184 | 0.5619621  | 0.67452801  | -0.113 |
| cg26494044 | II | 37 | 10 | 129760954 PTPRE                  | 0.42 | 0.02991 | 1.52413 | 0.60031303 | 0.487757516 | 0.113  |
| cg04780434 | I  | 37 | 10 | 134402787 INPP5A                 | 0.58 | 0.00041 | 3.39184 | 0.25006786 | 0.363567102 | -0.113 |
| cg08824847 | II | 37 | 11 | 35052388                         | 0.5  | 0.00432 | 2.36443 | 0.35034702 | 0.463266458 | -0.113 |
| cg24674703 | II | 37 | 11 | 60869960 CD5;CD5                 | 0.46 | 0.01197 | 1.92207 | 0.39214601 | 0.279642066 | 0.113  |
| cg15829423 | II | 37 | 11 | 68138862 LRP5                    | 0.42 | 0.02991 | 1.52413 | 0.79283278 | 0.680249173 | 0.113  |
| cg00464927 | I  | 37 | 11 | 68139121 LRP5                    | 0.5  | 0.00432 | 2.36443 | 0.64720972 | 0.533965289 | 0.113  |
| cg19478111 | I  | 37 | 11 | 73359987 PLEKHB1;PLEKHB1;PLEKHB1 | 0.42 | 0.02991 | 1.52413 | 0.67142233 | 0.558064927 | 0.113  |
| cg23507834 | II | 37 | 11 | 93824553 HEPHL1                  | 0.46 | 0.01197 | 1.92207 | 0.83135983 | 0.71831631  | 0.113  |
| cg24983752 | II | 37 | 11 | 115931334                        | 0.5  | 0.00432 | 2.36443 | 0.57528816 | 0.462159595 | 0.113  |
| cg01519094 | II | 37 | 11 | 125034181 PKNOX2                 | 0.54 | 0.0014  | 2.85345 | 0.17420373 | 0.287363161 | -0.113 |
| cg06826457 | II | 37 | 12 | 12867669                         | 0.5  | 0.00432 | 2.36443 | 0.30241198 | 0.189386045 | 0.113  |
| cg13700315 | II | 37 | 12 | 34489827                         | 0.58 | 0.00041 | 3.39184 | 0.50177792 | 0.614927767 | -0.113 |
| cg17866692 | II | 37 | 12 | 110228049 TRPV4;TRPV4            | 0.58 | 0.00041 | 3.39184 | 0.67983795 | 0.566984448 | 0.113  |
| cg15234492 | II | 37 | 12 | 122019076 KDM2B;KDM2B            | 0.5  | 0.00432 | 2.36443 | 0.30519409 | 0.418569723 | -0.113 |
| cg18637761 | II | 37 | 12 | 123468780 PITPNM2                | 0.46 | 0.01197 | 1.92207 | 0.20987995 | 0.322546377 | -0.113 |
| cg15243578 | I  | 37 | 12 | 123469284 PITPNM2                | 0.5  | 0.00432 | 2.36443 | 0.46066568 | 0.573181528 | -0.113 |
| cg26764846 | II | 37 | 13 | 20797693 GJB6;GJB6;GJB6;GJB6     | 0.54 | 0.0014  | 2.85345 | 0.71046579 | 0.823911958 | -0.113 |

|            |    |    |    |           |                   |      |          |         |            |             |        |
|------------|----|----|----|-----------|-------------------|------|----------|---------|------------|-------------|--------|
| cg25221774 | II | 37 | 13 | 101173669 | PCCA;PCCA         | 0.67 | 2.34E-05 | 4.63072 | 0.60537019 | 0.717910777 | -0.113 |
| cg01956420 | I  | 37 | 13 | 110959668 | COL4A1;COL4A2;CC  | 0.42 | 0.02991  | 1.52413 | 0.0217033  | 0.135118225 | -0.113 |
| cg02219601 | II | 37 | 14 | 35835511  |                   | 0.58 | 0.00041  | 3.39184 | 0.25778696 | 0.371258556 | -0.113 |
| cg12827637 | I  | 37 | 14 | 69256791  | ZFP36L1           | 0.42 | 0.02991  | 1.52413 | 0.49947012 | 0.386740333 | 0.113  |
| cg16267322 | II | 37 | 14 | 92864074  | SLC24A4;SLC24A4;S | 0.58 | 0.00041  | 3.39184 | 0.78496406 | 0.898325072 | -0.113 |
| cg10761315 | I  | 37 | 14 | 104552034 | ASPG              | 0.46 | 0.01197  | 1.92207 | 0.13395501 | 0.246989648 | -0.113 |
| cg12063580 | II | 37 | 14 | 105783627 | PACS2;PACS2       | 0.58 | 0.00041  | 3.39184 | 0.31818798 | 0.431124868 | -0.113 |
| cg26767198 | II | 37 | 15 | 29078705  |                   | 0.5  | 0.00432  | 2.36443 | 0.38114943 | 0.4941469   | -0.113 |
| cg06070324 | II | 37 | 15 | 75322058  | PPCDC             | 0.42 | 0.02991  | 1.52413 | 0.26183298 | 0.375104017 | -0.113 |
| cg04643527 | II | 37 | 16 | 3312946   |                   | 0.58 | 0.00041  | 3.39184 | 0.70363607 | 0.817087776 | -0.113 |
| cg00510320 | II | 37 | 16 | 67686943  | RLTPR             | 0.42 | 0.02991  | 1.52413 | 0.60133541 | 0.714273221 | -0.113 |
| cg10520672 | II | 37 | 16 | 86018680  |                   | 0.46 | 0.01197  | 1.92207 | 0.16061052 | 0.273581317 | -0.113 |
| cg25627098 | II | 37 | 17 | 7328734   | C17orf74          | 0.5  | 0.00432  | 2.36443 | 0.26195619 | 0.374834912 | -0.113 |
| cg07710335 | II | 37 | 17 | 15151869  | PMP22;PMP22;PM    | 0.46 | 0.01197  | 1.92207 | 0.81537425 | 0.70251817  | 0.113  |
| cg00005437 | II | 37 | 17 | 18010740  | DRG2;MYO15A       | 0.46 | 0.01197  | 1.92207 | 0.69404359 | 0.58131391  | 0.113  |
| cg15036326 | II | 37 | 17 | 27048708  | RPL23A;SNORD4A    | 0.5  | 0.00432  | 2.36443 | 0.73981178 | 0.626919232 | 0.113  |
| cg15298286 | II | 37 | 17 | 62075324  | C17orf72          | 0.67 | 2.34E-05 | 4.63072 | 0.23683347 | 0.35011593  | -0.113 |
| cg14020176 | I  | 37 | 17 | 72764985  | SLC9A3R1          | 0.67 | 2.34E-05 | 4.63072 | 0.72327077 | 0.836031465 | -0.113 |
| cg25923214 | I  | 37 | 17 | 74864205  | MGAT5B            | 0.42 | 0.02991  | 1.52413 | 0.45872908 | 0.571969959 | -0.113 |
| cg14011789 | I  | 37 | 17 | 75452044  | SEPT9;SEPT9;SEPT9 | 0.62 | 0.0001   | 3.98291 | 0.88121752 | 0.768084541 | 0.113  |
| cg03633458 | I  | 37 | 19 | 852284    | ELANE             | 0.5  | 0.00432  | 2.36443 | 0.37562458 | 0.488573882 | -0.113 |
| cg09788082 | I  | 37 | 19 | 1163485   | SBNO2             | 0.5  | 0.00432  | 2.36443 | 0.81938456 | 0.93231936  | -0.113 |
| cg21550623 | II | 37 | 19 | 2734683   | SLC39A3;SLC39A3   | 0.42 | 0.02991  | 1.52413 | 0.66508456 | 0.552094017 | 0.113  |
| cg06561886 | I  | 37 | 19 | 10736299  | SLC44A2;SLC44A2;S | 0.54 | 0.0014   | 2.85345 | 0.68875195 | 0.801493427 | -0.113 |
| cg10372770 | II | 37 | 19 | 12377156  |                   | 0.42 | 0.02991  | 1.52413 | 0.61065798 | 0.723269507 | -0.113 |
| cg18232841 | II | 37 | 19 | 35615103  | FXVD3;FXVD3;FXVD  | 0.5  | 0.00432  | 2.36443 | 0.56026366 | 0.447044041 | 0.113  |
| cg18651578 | II | 37 | 20 | 5844315   | C20orf196         | 0.54 | 0.0014   | 2.85345 | 0.80892407 | 0.922319296 | -0.113 |
| cg12413156 | II | 37 | 20 | 62368256  | LIME1             | 0.46 | 0.01197  | 1.92207 | 0.48067783 | 0.367360488 | 0.113  |
| cg13120798 | II | 37 | 22 | 21090264  | PI4KA;PI4KA       | 0.46 | 0.01197  | 1.92207 | 0.4744126  | 0.587104909 | -0.113 |
| cg26999345 | II | 37 | 22 | 37584441  | C1QTNF6;C1QTNF6   | 0.54 | 0.0014   | 2.85345 | 0.29254474 | 0.40511486  | -0.113 |
| cg21771250 | II | 37 | 22 | 40406049  | FAM83F            | 0.42 | 0.02991  | 1.52413 | 0.45938439 | 0.572462274 | -0.113 |
| cg04090867 | II | 37 | 1  | 10794229  | CASZ1;CASZ1       | 0.5  | 0.00432  | 2.36443 | 0.71537433 | 0.603210443 | 0.112  |
| cg00719568 | II | 37 | 1  | 113239645 | MOV10;MOV10       | 0.54 | 0.0014   | 2.85345 | 0.78313812 | 0.671390331 | 0.112  |

|            |    |    |   |           |                   |      |          |         |            |             |        |
|------------|----|----|---|-----------|-------------------|------|----------|---------|------------|-------------|--------|
| cg18645493 | II | 37 | 1 | 154167437 | MIR190B           | 0.67 | 2.34E-05 | 4.63072 | 0.3416853  | 0.453959765 | -0.112 |
| cg01782486 | II | 37 | 1 | 154986512 | ZBTB7B            | 0.54 | 0.0014   | 2.85345 | 0.64736739 | 0.535445537 | 0.112  |
| cg00160981 | II | 37 | 1 | 161691911 | FCRLB             | 0.46 | 0.01197  | 1.92207 | 0.23734458 | 0.34917322  | -0.112 |
| cg01598007 | II | 37 | 1 | 167063581 | DUSP27            | 0.5  | 0.00432  | 2.36443 | 0.60213711 | 0.713681894 | -0.112 |
| cg27179622 | I  | 37 | 1 | 226127290 | LEFTY2            | 0.5  | 0.00432  | 2.36443 | 0.60321325 | 0.49094571  | 0.112  |
| cg08571738 | II | 37 | 2 | 2605398   |                   | 0.46 | 0.01197  | 1.92207 | 0.72801317 | 0.839913898 | -0.112 |
| cg18122743 | II | 37 | 2 | 41921124  |                   | 0.5  | 0.00432  | 2.36443 | 0.73747905 | 0.625857346 | 0.112  |
| cg07011538 | II | 37 | 2 | 47497026  |                   | 0.54 | 0.0014   | 2.85345 | 0.71024948 | 0.822672149 | -0.112 |
| cg14325025 | II | 37 | 2 | 102608155 | IL1R2             | 0.46 | 0.01197  | 1.92207 | 0.15701085 | 0.268920386 | -0.112 |
| cg21838979 | II | 37 | 2 | 106681945 | C2orf40           | 0.58 | 0.00041  | 3.39184 | 0.14491103 | 0.257115781 | -0.112 |
| cg17112958 | II | 37 | 2 | 133426934 | LYPD1;LYPD1       | 0.46 | 0.01197  | 1.92207 | 0.1531334  | 0.265093778 | -0.112 |
| cg03051392 | II | 37 | 3 | 50360176  | HYAL2;HYAL2;HYAL  | 0.58 | 0.00041  | 3.39184 | 0.47377958 | 0.585543401 | -0.112 |
| cg26460678 | I  | 37 | 3 | 50360667  | HYAL2             | 0.54 | 0.0014   | 2.85345 | 0.55200249 | 0.664256238 | -0.112 |
| cg00171092 | II | 37 | 3 | 124531371 | ITGB5             | 0.5  | 0.00432  | 2.36443 | 0.81323691 | 0.701501181 | 0.112  |
| cg00701064 | II | 37 | 4 | 6280414   | WFS1;WFS1         | 0.5  | 0.00432  | 2.36443 | 0.34556794 | 0.457123492 | -0.112 |
| cg06109284 | II | 37 | 4 | 6965057   | TBC1D14;TBC1D14   | 0.42 | 0.02991  | 1.52413 | 0.7421671  | 0.629751812 | 0.112  |
| cg18949666 | II | 37 | 4 | 170187451 | SH3RF1            | 0.5  | 0.00432  | 2.36443 | 0.73759832 | 0.849503831 | -0.112 |
| cg00220335 | II | 37 | 5 | 1343783   | CLPTM1L           | 0.46 | 0.01197  | 1.92207 | 0.60673247 | 0.494950294 | 0.112  |
| cg26389330 | II | 37 | 5 | 151057860 | SPARC             | 0.54 | 0.0014   | 2.85345 | 0.30535613 | 0.417842899 | -0.112 |
| cg26694831 | I  | 37 | 5 | 178763419 | ADAMTS2;ADAMTS    | 0.42 | 0.02991  | 1.52413 | 0.84448549 | 0.956113367 | -0.112 |
| cg09897374 | I  | 37 | 6 | 28584076  |                   | 0.42 | 0.02991  | 1.52413 | 0.11880563 | 0.230483582 | -0.112 |
| cg03343571 | I  | 37 | 6 | 30039175  | RNF39;RNF39       | 0.42 | 0.02991  | 1.52413 | 0.15461031 | 0.266138375 | -0.112 |
| cg05824482 | II | 37 | 6 | 30126161  | TRIM10;TRIM10     | 0.5  | 0.00432  | 2.36443 | 0.73388894 | 0.845479901 | -0.112 |
| cg03216698 | II | 37 | 6 | 32021500  | TNXB              | 0.42 | 0.02991  | 1.52413 | 0.54546485 | 0.433788054 | 0.112  |
| cg10666909 | II | 37 | 6 | 32820249  | TAP1              | 0.46 | 0.01197  | 1.92207 | 0.71857536 | 0.606560003 | 0.112  |
| cg11796996 | I  | 37 | 6 | 33280159  | TAPBP;TAPBP;TAPB  | 0.5  | 0.00432  | 2.36443 | 0.54249424 | 0.430881411 | 0.112  |
| cg08858220 | II | 37 | 6 | 36805317  | CPNE5             | 0.42 | 0.02991  | 1.52413 | 0.64812608 | 0.536032985 | 0.112  |
| cg08273233 | II | 37 | 6 | 87724979  | HTR1E             | 0.46 | 0.01197  | 1.92207 | 0.73673262 | 0.624847266 | 0.112  |
| cg15931839 | II | 37 | 6 | 111880530 | TRAF3IP2;TRAF3IP2 | 0.42 | 0.02991  | 1.52413 | 0.28839962 | 0.175982133 | 0.112  |
| cg07404200 | II | 37 | 6 | 166876585 | RPS6KA2;RPS6KA2   | 0.54 | 0.0014   | 2.85345 | 0.42489639 | 0.536580607 | -0.112 |
| cg15196529 | II | 37 | 6 | 167658907 |                   | 0.54 | 0.0014   | 2.85345 | 0.75463223 | 0.642579972 | 0.112  |
| cg13588517 | II | 37 | 6 | 170562720 |                   | 0.42 | 0.02991  | 1.52413 | 0.66461375 | 0.552936065 | 0.112  |
| cg06789500 | II | 37 | 7 | 2109450   | MAD1L1;MAD1L1;M   | 0.58 | 0.00041  | 3.39184 | 0.70619611 | 0.818188257 | -0.112 |

|            |    |    |    |           |                  |      |          |         |            |             |        |
|------------|----|----|----|-----------|------------------|------|----------|---------|------------|-------------|--------|
| cg17228698 | II | 37 | 7  | 2451914   | CHST12           | 0.58 | 0.00041  | 3.39184 | 0.71496241 | 0.827225241 | -0.112 |
| cg03040622 | II | 37 | 7  | 5536937   | MIR589;FBXL18    | 0.5  | 0.00432  | 2.36443 | 0.39869602 | 0.510372919 | -0.112 |
| cg01412469 | II | 37 | 7  | 41732237  | INHBA;LOC285954; | 0.62 | 0.0001   | 3.98291 | 0.34282567 | 0.454888396 | -0.112 |
| cg23192873 | II | 37 | 7  | 91809044  |                  | 0.42 | 0.02991  | 1.52413 | 0.36289824 | 0.475007439 | -0.112 |
| cg17150663 | II | 37 | 7  | 128551672 | KCP;KCP          | 0.5  | 0.00432  | 2.36443 | 0.59725178 | 0.709416382 | -0.112 |
| cg23630442 | II | 37 | 8  | 18245225  |                  | 0.67 | 2.34E-05 | 4.63072 | 0.61132868 | 0.723791254 | -0.112 |
| cg15257489 | II | 37 | 8  | 49430059  |                  | 0.46 | 0.01197  | 1.92207 | 0.70782608 | 0.595363636 | 0.112  |
| cg14266248 | II | 37 | 8  | 62606211  | ASPH;ASPH;ASPH;A | 0.42 | 0.02991  | 1.52413 | 0.69170249 | 0.803955934 | -0.112 |
| cg25327343 | II | 37 | 8  | 120221797 | MAL2             | 0.5  | 0.00432  | 2.36443 | 0.47865903 | 0.590774123 | -0.112 |
| cg25877009 | I  | 37 | 8  | 142288517 |                  | 0.5  | 0.00432  | 2.36443 | 0.65256829 | 0.765023177 | -0.112 |
| cg02086839 | II | 37 | 8  | 144403439 | TOP1MT           | 0.54 | 0.0014   | 2.85345 | 0.67495521 | 0.787145726 | -0.112 |
| cg00055726 | II | 37 | 9  | 136445425 | FAM163B          | 0.5  | 0.00432  | 2.36443 | 0.19624889 | 0.084241925 | 0.112  |
| cg10556349 | II | 37 | 10 | 835070    |                  | 0.46 | 0.01197  | 1.92207 | 0.34954898 | 0.461160438 | -0.112 |
| cg20341089 | II | 37 | 10 | 121447367 |                  | 0.42 | 0.02991  | 1.52413 | 0.6269675  | 0.738721955 | -0.112 |
| cg19038027 | II | 37 | 10 | 134306852 |                  | 0.5  | 0.00432  | 2.36443 | 0.73819966 | 0.626141968 | 0.112  |
| cg19623624 | I  | 37 | 10 | 135278901 | LOC619207        | 0.46 | 0.01197  | 1.92207 | 0.61919095 | 0.731189746 | -0.112 |
| cg11611244 | II | 37 | 11 | 1507263   | HCCA2            | 0.42 | 0.02991  | 1.52413 | 0.66518296 | 0.553363569 | 0.112  |
| cg17229197 | II | 37 | 11 | 2542688   | KCNQ1;KCNQ1      | 0.46 | 0.01197  | 1.92207 | 0.8312859  | 0.718951715 | 0.112  |
| cg02251663 | II | 37 | 11 | 14281053  | SPON1            | 0.42 | 0.02991  | 1.52413 | 0.52317568 | 0.634887914 | -0.112 |
| cg15675740 | II | 37 | 11 | 45874617  | CRY2;CRY2        | 0.46 | 0.01197  | 1.92207 | 0.71314807 | 0.600678938 | 0.112  |
| cg13526040 | I  | 37 | 11 | 57093322  | TNKS1BP1         | 0.42 | 0.02991  | 1.52413 | 0.46457137 | 0.352736441 | 0.112  |
| cg26898077 | II | 37 | 11 | 67811114  | TCIRG1;TCIRG1    | 0.62 | 0.0001   | 3.98291 | 0.72614014 | 0.838470001 | -0.112 |
| cg20267732 | II | 37 | 11 | 77787848  | NDUFC2           | 0.46 | 0.01197  | 1.92207 | 0.65544923 | 0.766963535 | -0.112 |
| cg25473794 | I  | 37 | 11 | 77921181  | USP35            | 0.46 | 0.01197  | 1.92207 | 0.74658806 | 0.858125185 | -0.112 |
| cg04535665 | II | 37 | 11 | 104972135 | CARD17;CASP1;CAS | 0.46 | 0.01197  | 1.92207 | 0.46568936 | 0.577371105 | -0.112 |
| cg21623445 | II | 37 | 12 | 177995    | IQSEC3           | 0.58 | 0.00041  | 3.39184 | 0.51456268 | 0.402845633 | 0.112  |
| cg25354587 | II | 37 | 12 | 3590738   |                  | 0.46 | 0.01197  | 1.92207 | 0.48609874 | 0.37388127  | 0.112  |
| cg19374752 | II | 37 | 12 | 52404151  | GRASP            | 0.67 | 2.34E-05 | 4.63072 | 0.41836899 | 0.53070528  | -0.112 |
| cg18148255 | II | 37 | 12 | 89476250  |                  | 0.46 | 0.01197  | 1.92207 | 0.80866927 | 0.69688849  | 0.112  |
| cg10283036 | I  | 37 | 12 | 111853088 | SH2B3            | 0.54 | 0.0014   | 2.85345 | 0.72563362 | 0.83788403  | -0.112 |
| cg14844236 | I  | 37 | 12 | 123753212 | CDK2AP1          | 0.58 | 0.00041  | 3.39184 | 0.32015313 | 0.432265311 | -0.112 |
| cg16692277 | II | 37 | 13 | 51640948  | GUCY1B2          | 0.46 | 0.01197  | 1.92207 | 0.23936151 | 0.351022174 | -0.112 |
| cg27417606 | II | 37 | 14 | 21503144  | RNASE13          | 0.58 | 0.00041  | 3.39184 | 0.79367957 | 0.681839061 | 0.112  |

|            |    |    |    |           |                         |      |          |         |            |             |        |
|------------|----|----|----|-----------|-------------------------|------|----------|---------|------------|-------------|--------|
| cg08593009 | II | 37 | 14 | 94943184  | SERPINA9;SERPINA9       | 0.5  | 0.00432  | 2.36443 | 0.65428236 | 0.541847965 | 0.112  |
| cg02964434 | II | 37 | 15 | 31617537  |                         | 0.5  | 0.00432  | 2.36443 | 0.57359469 | 0.461745892 | 0.112  |
| cg06100161 | II | 37 | 15 | 60987894  | RORA                    | 0.54 | 0.0014   | 2.85345 | 0.80471747 | 0.693063645 | 0.112  |
| cg07217653 | II | 37 | 15 | 101591436 | LRRK1                   | 0.46 | 0.01197  | 1.92207 | 0.74725224 | 0.634838702 | 0.112  |
| cg01422009 | II | 37 | 16 | 125896    | MPG                     | 0.54 | 0.0014   | 2.85345 | 0.67223288 | 0.784025789 | -0.112 |
| cg00354542 | II | 37 | 16 | 434356    | LOC100134368            | 0.5  | 0.00432  | 2.36443 | 0.24365493 | 0.356061547 | -0.112 |
| cg02453013 | II | 37 | 16 | 1297491   |                         | 0.54 | 0.0014   | 2.85345 | 0.62142562 | 0.733122879 | -0.112 |
| cg01500402 | II | 37 | 16 | 2256716   | MLST8                   | 0.58 | 0.00041  | 3.39184 | 0.25976359 | 0.372243603 | -0.112 |
| cg26504467 | II | 37 | 16 | 11318653  |                         | 0.5  | 0.00432  | 2.36443 | 0.76090803 | 0.64852389  | 0.112  |
| cg01538731 | II | 37 | 16 | 87757018  | KLHDC4                  | 0.46 | 0.01197  | 1.92207 | 0.61839146 | 0.50680644  | 0.112  |
| cg08721324 | II | 37 | 16 | 89384602  | ANKRD11                 | 0.58 | 0.00041  | 3.39184 | 0.5440074  | 0.656386812 | -0.112 |
| cg06940127 | II | 37 | 17 | 1665303   | SERPINF1;SERPINF1       | 0.58 | 0.00041  | 3.39184 | 0.41391603 | 0.525781556 | -0.112 |
| cg04464719 | I  | 37 | 17 | 3824422   |                         | 0.58 | 0.00041  | 3.39184 | 0.50644828 | 0.394452844 | 0.112  |
| cg26043460 | II | 37 | 17 | 39593631  | KRT38                   | 0.58 | 0.00041  | 3.39184 | 0.7598941  | 0.648208597 | 0.112  |
| cg16826777 | II | 37 | 17 | 43376882  | MAP3K14                 | 0.67 | 2.34E-05 | 4.63072 | 0.42241669 | 0.534172578 | -0.112 |
| cg25839227 | II | 37 | 17 | 47288502  | ABI3;ABI3               | 0.5  | 0.00432  | 2.36443 | 0.66279379 | 0.55079122  | 0.112  |
| cg13747876 | II | 37 | 17 | 80195402  | SLC16A3;SLC16A3;SLC16A3 | 0.42 | 0.02991  | 1.52413 | 0.63173858 | 0.743407556 | -0.112 |
| cg22382836 | I  | 37 | 19 | 723036    | PALM;PALM               | 0.46 | 0.01197  | 1.92207 | 0.27526613 | 0.162829669 | 0.112  |
| cg10643550 | II | 37 | 19 | 1603857   | UQCR                    | 0.58 | 0.00041  | 3.39184 | 0.58699302 | 0.69929857  | -0.112 |
| cg02020969 | II | 37 | 19 | 2484938   |                         | 0.46 | 0.01197  | 1.92207 | 0.65570949 | 0.543274444 | 0.112  |
| cg22548088 | II | 37 | 19 | 6271786   | MLLT1                   | 0.67 | 2.34E-05 | 4.63072 | 0.59672225 | 0.708908218 | -0.112 |
| cg14753070 | II | 37 | 19 | 14163842  | IL27RA                  | 0.46 | 0.01197  | 1.92207 | 0.76631479 | 0.654448279 | 0.112  |
| cg18145683 | II | 37 | 19 | 17959281  | JAK3                    | 0.54 | 0.0014   | 2.85345 | 0.51713424 | 0.629493184 | -0.112 |
| cg14810329 | II | 37 | 19 | 35086653  | SCGBL                   | 0.42 | 0.02991  | 1.52413 | 0.61045171 | 0.498092158 | 0.112  |
| cg24030173 | II | 37 | 19 | 48922140  | GRIN2D                  | 0.71 | 4.57E-06 | 5.34042 | 0.22031197 | 0.332569278 | -0.112 |
| cg17661220 | II | 37 | 20 | 3693179   |                         | 0.46 | 0.01197  | 1.92207 | 0.27302412 | 0.384763465 | -0.112 |
| cg11316100 | II | 37 | 20 | 35233380  | C20orf24;C20orf24       | 0.58 | 0.00041  | 3.39184 | 0.27869193 | 0.166397889 | 0.112  |
| cg25541209 | II | 37 | 20 | 45947892  | ZMYND8;ZMYND8;ZMYND8    | 0.58 | 0.00041  | 3.39184 | 0.49047163 | 0.602064292 | -0.112 |
| cg12097791 | II | 37 | 20 | 50719777  | ZFP64                   | 0.54 | 0.0014   | 2.85345 | 0.2656983  | 0.377447438 | -0.112 |
| cg17929273 | II | 37 | 22 | 37967569  | LGALS2                  | 0.42 | 0.02991  | 1.52413 | 0.68874418 | 0.576384939 | 0.112  |
| cg00400964 | II | 37 | 22 | 42325444  |                         | 0.46 | 0.01197  | 1.92207 | 0.82069701 | 0.709028002 | 0.112  |
| cg06967105 | II | 37 | 1  | 1104265   | MIR429                  | 0.54 | 0.0014   | 2.85345 | 0.51788228 | 0.406966578 | 0.111  |
| cg00567930 | II | 37 | 1  | 2250796   |                         | 0.46 | 0.01197  | 1.92207 | 0.76476491 | 0.653839536 | 0.111  |

|            |    |    |   |           |                   |      |          |         |            |             |        |
|------------|----|----|---|-----------|-------------------|------|----------|---------|------------|-------------|--------|
| cg15211996 | II | 37 | 1 | 2936768   | ACTRT2            | 0.62 | 0.0001   | 3.98291 | 0.67367923 | 0.562815533 | 0.111  |
| cg04898695 | II | 37 | 1 | 6208717   | CHD5              | 0.71 | 4.57E-06 | 5.34042 | 0.16175597 | 0.272341198 | -0.111 |
| cg05944661 | II | 37 | 1 | 6457799   |                   | 0.54 | 0.0014   | 2.85345 | 0.69241499 | 0.581345985 | 0.111  |
| cg00648005 | I  | 37 | 1 | 9086914   | SLC2A7            | 0.5  | 0.00432  | 2.36443 | 0.63150512 | 0.742478239 | -0.111 |
| cg24435669 | II | 37 | 1 | 15546149  | TMEM51;TMEM51;    | 0.46 | 0.01197  | 1.92207 | 0.66752292 | 0.556544664 | 0.111  |
| cg24502330 | II | 37 | 1 | 20914028  | CDA               | 0.46 | 0.01197  | 1.92207 | 0.45532897 | 0.565907839 | -0.111 |
| cg24492886 | II | 37 | 1 | 28474511  | PTAFR;PTAFR;PTAFI | 0.46 | 0.01197  | 1.92207 | 0.83360279 | 0.722634348 | 0.111  |
| cg13100137 | II | 37 | 1 | 37937945  |                   | 0.71 | 4.57E-06 | 5.34042 | 0.48866107 | 0.600066416 | -0.111 |
| cg00944580 | II | 37 | 1 | 58333307  | DAB1;MIR548D2     | 0.54 | 0.0014   | 2.85345 | 0.7438917  | 0.633265658 | 0.111  |
| cg00571483 | II | 37 | 1 | 59046173  |                   | 0.54 | 0.0014   | 2.85345 | 0.30940078 | 0.420307112 | -0.111 |
| cg17936236 | II | 37 | 1 | 167520305 | CREG1             | 0.62 | 0.0001   | 3.98291 | 0.59147004 | 0.702409285 | -0.111 |
| cg12343591 | II | 37 | 2 | 16031275  |                   | 0.58 | 0.00041  | 3.39184 | 0.84669944 | 0.736190294 | 0.111  |
| cg20340242 | II | 37 | 2 | 102608349 | IL1R2;IL1R2       | 0.46 | 0.01197  | 1.92207 | 0.24122281 | 0.352588677 | -0.111 |
| cg07992484 | II | 37 | 2 | 106724161 | UXS1              | 0.42 | 0.02991  | 1.52413 | 0.55993001 | 0.449365412 | 0.111  |
| cg09152259 | II | 37 | 2 | 128156114 |                   | 0.54 | 0.0014   | 2.85345 | 0.31926809 | 0.430000902 | -0.111 |
| cg17513592 | II | 37 | 2 | 202894435 |                   | 0.42 | 0.02991  | 1.52413 | 0.70912677 | 0.59844435  | 0.111  |
| cg20300794 | I  | 37 | 2 | 234359705 | DGKD;DGKD         | 0.42 | 0.02991  | 1.52413 | 0.78100187 | 0.892264132 | -0.111 |
| cg20971407 | II | 37 | 3 | 5022392   | BHLHE40           | 0.5  | 0.00432  | 2.36443 | 0.70849487 | 0.597356719 | 0.111  |
| cg25664938 | II | 37 | 3 | 119030023 | CDGAP             | 0.46 | 0.01197  | 1.92207 | 0.72832994 | 0.838983958 | -0.111 |
| cg25250358 | II | 37 | 3 | 145879084 | PLOD2;PLOD2;PLOI  | 0.5  | 0.00432  | 2.36443 | 0.13293994 | 0.243738366 | -0.111 |
| cg10085474 | II | 37 | 4 | 1221935   | CTBP1;CTBP1       | 0.5  | 0.00432  | 2.36443 | 0.39968095 | 0.510243177 | -0.111 |
| cg13673960 | II | 37 | 4 | 1742301   | TACC3             | 0.54 | 0.0014   | 2.85345 | 0.63156905 | 0.742390787 | -0.111 |
| cg01787559 | II | 37 | 4 | 3450770   | HGFAC             | 0.46 | 0.01197  | 1.92207 | 0.4008999  | 0.289633102 | 0.111  |
| cg15406387 | II | 37 | 4 | 111397332 | ENPEP;ENPEP       | 0.42 | 0.02991  | 1.52413 | 0.44633544 | 0.557572248 | -0.111 |
| cg03033182 | II | 37 | 4 | 141177619 | SCOC              | 0.46 | 0.01197  | 1.92207 | 0.64514761 | 0.755839409 | -0.111 |
| cg01300684 | II | 37 | 4 | 141230118 | SCOC              | 0.58 | 0.00041  | 3.39184 | 0.8099123  | 0.698489569 | 0.111  |
| cg00049729 | I  | 37 | 5 | 55776345  |                   | 0.58 | 0.00041  | 3.39184 | 0.52401619 | 0.412941983 | 0.111  |
| cg08490107 | I  | 37 | 5 | 171774272 | SH3PXD2B          | 0.5  | 0.00432  | 2.36443 | 0.87381723 | 0.763095903 | 0.111  |
| cg03127104 | II | 37 | 6 | 29599250  | GABBR1;GABBR1     | 0.58 | 0.00041  | 3.39184 | 0.56008669 | 0.670665769 | -0.111 |
| cg04276750 | II | 37 | 6 | 29856938  | HLA-H             | 0.42 | 0.02991  | 1.52413 | 0.77459921 | 0.663809659 | 0.111  |
| cg08420066 | II | 37 | 6 | 30647561  | KIAA1949;KIAA1949 | 0.62 | 0.0001   | 3.98291 | 0.26258752 | 0.151247241 | 0.111  |
| cg17755321 | II | 37 | 6 | 31546085  | TNF               | 0.5  | 0.00432  | 2.36443 | 0.807508   | 0.696583055 | 0.111  |
| cg22361816 | I  | 37 | 6 | 33141798  | COL11A2;COL11A2;  | 0.42 | 0.02991  | 1.52413 | 0.50400471 | 0.392812106 | 0.111  |

|            |    |    |    |                             |      |          |         |            |             |        |
|------------|----|----|----|-----------------------------|------|----------|---------|------------|-------------|--------|
| cg11772020 | II | 37 | 6  | 43806470                    | 0.67 | 2.34E-05 | 4.63072 | 0.32010068 | 0.431013751 | -0.111 |
| cg03072286 | II | 37 | 6  | 150262044 ULBP2             | 0.58 | 0.00041  | 3.39184 | 0.14303181 | 0.254118798 | -0.111 |
| cg10251229 | II | 37 | 7  | 630581 PRKAR1B;PRKAR1B      | 0.54 | 0.0014   | 2.85345 | 0.56439844 | 0.675721727 | -0.111 |
| cg07690127 | II | 37 | 7  | 2077293 MAD1L1;MAD1L1;M     | 0.5  | 0.00432  | 2.36443 | 0.67594226 | 0.786697804 | -0.111 |
| cg18880986 | I  | 37 | 7  | 5534951 FBXL18              | 0.5  | 0.00432  | 2.36443 | 0.62499089 | 0.513640353 | 0.111  |
| cg19071544 | II | 37 | 7  | 30504941 NOD1               | 0.54 | 0.0014   | 2.85345 | 0.29468386 | 0.405705619 | -0.111 |
| cg05988548 | II | 37 | 7  | 38695932                    | 0.54 | 0.0014   | 2.85345 | 0.42029557 | 0.531345733 | -0.111 |
| cg22138096 | II | 37 | 7  | 41772439 LOC285954          | 0.46 | 0.01197  | 1.92207 | 0.60681605 | 0.718290947 | -0.111 |
| cg14690467 | II | 37 | 7  | 148917905 ZNF282            | 0.54 | 0.0014   | 2.85345 | 0.7023022  | 0.812849692 | -0.111 |
| cg23903252 | II | 37 | 7  | 149569998 ATP6V0E2;ATP6V0E  | 0.5  | 0.00432  | 2.36443 | 0.23288132 | 0.343524015 | -0.111 |
| cg22615330 | II | 37 | 7  | 151502322 PRKAG2;PRKAG2     | 0.5  | 0.00432  | 2.36443 | 0.5551516  | 0.666013313 | -0.111 |
| cg03631656 | I  | 37 | 8  | 6420770 ANGPT2;ANGPT2;A     | 0.42 | 0.02991  | 1.52413 | 0.67510766 | 0.786458072 | -0.111 |
| cg21926626 | II | 37 | 8  | 143382226 TSNARE1           | 0.5  | 0.00432  | 2.36443 | 0.50635171 | 0.617378084 | -0.111 |
| cg13300202 | II | 37 | 8  | 143407491 TSNARE1           | 0.46 | 0.01197  | 1.92207 | 0.30823224 | 0.419722286 | -0.111 |
| cg14381994 | II | 37 | 8  | 144262769                   | 0.42 | 0.02991  | 1.52413 | 0.79824015 | 0.687010599 | 0.111  |
| cg14289429 | II | 37 | 9  | 134139878 FAM78A            | 0.58 | 0.00041  | 3.39184 | 0.5977876  | 0.708767081 | -0.111 |
| cg13826666 | I  | 37 | 9  | 136600241 SARDH;SARDH       | 0.5  | 0.00432  | 2.36443 | 0.72630126 | 0.615109586 | 0.111  |
| cg14341131 | I  | 37 | 9  | 138605049 KCNT1             | 0.54 | 0.0014   | 2.85345 | 0.53975443 | 0.428399423 | 0.111  |
| cg02449762 | II | 37 | 10 | 5661741                     | 0.42 | 0.02991  | 1.52413 | 0.50843174 | 0.397853045 | 0.111  |
| cg26316423 | II | 37 | 10 | 6104137 IL2RA;IL2RA         | 0.46 | 0.01197  | 1.92207 | 0.63569597 | 0.524978392 | 0.111  |
| cg14685948 | II | 37 | 10 | 71608654 COL13A1;COL13A1;   | 0.42 | 0.02991  | 1.52413 | 0.61827352 | 0.507667286 | 0.111  |
| cg15763670 | II | 37 | 10 | 73473235 C10orf105;C10orf10 | 0.62 | 0.0001   | 3.98291 | 0.42257518 | 0.533425106 | -0.111 |
| cg09357462 | II | 37 | 10 | 112259305 DUSP5             | 0.54 | 0.0014   | 2.85345 | 0.64293838 | 0.53190406  | 0.111  |
| cg24158157 | I  | 37 | 10 | 124581726                   | 0.5  | 0.00432  | 2.36443 | 0.7177396  | 0.606430303 | 0.111  |
| cg06740578 | II | 37 | 10 | 131142473                   | 0.58 | 0.00041  | 3.39184 | 0.80073701 | 0.689895889 | 0.111  |
| cg26158270 | II | 37 | 11 | 12309622 MICALCL            | 0.62 | 0.0001   | 3.98291 | 0.6907544  | 0.801285853 | -0.111 |
| cg02886208 | I  | 37 | 11 | 14281011 SPON1              | 0.5  | 0.00432  | 2.36443 | 0.80353194 | 0.914234496 | -0.111 |
| cg19045191 | II | 37 | 11 | 34167855 NAT10;NAT10        | 0.5  | 0.00432  | 2.36443 | 0.73128291 | 0.620334172 | 0.111  |
| cg08442823 | II | 37 | 11 | 45951803 PHF21A;PHF21A      | 0.5  | 0.00432  | 2.36443 | 0.30947106 | 0.19845498  | 0.111  |
| cg22101045 | II | 37 | 11 | 47927509                    | 0.5  | 0.00432  | 2.36443 | 0.65220537 | 0.763267973 | -0.111 |
| cg04728402 | II | 37 | 11 | 62104662 ASRGL1;ASRGL1      | 0.62 | 0.0001   | 3.98291 | 0.702367   | 0.81313219  | -0.111 |
| cg10851168 | II | 37 | 11 | 70317508 SHANK2;SHANK2      | 0.5  | 0.00432  | 2.36443 | 0.76287405 | 0.652132796 | 0.111  |
| cg20210482 | I  | 37 | 11 | 126286493                   | 0.54 | 0.0014   | 2.85345 | 0.08685572 | 0.198060862 | -0.111 |

|            |    |    |    |           |                   |      |          |         |            |             |        |
|------------|----|----|----|-----------|-------------------|------|----------|---------|------------|-------------|--------|
| cg04468568 | II | 37 | 11 | 128776059 | C11orf45;KCNJ5    | 0.54 | 0.0014   | 2.85345 | 0.3317107  | 0.443039876 | -0.111 |
| cg08707456 | I  | 37 | 11 | 134829365 |                   | 0.62 | 0.0001   | 3.98291 | 0.73927199 | 0.62836079  | 0.111  |
| cg03879460 | I  | 37 | 12 | 562272    |                   | 0.62 | 0.0001   | 3.98291 | 0.27168568 | 0.160801786 | 0.111  |
| cg23841186 | II | 37 | 12 | 53492662  | IGFBP6            | 0.5  | 0.00432  | 2.36443 | 0.45429485 | 0.565657119 | -0.111 |
| cg16774946 | I  | 37 | 13 | 24798195  | SPATA13;SPATA13   | 0.46 | 0.01197  | 1.92207 | 0.42171749 | 0.310745841 | 0.111  |
| cg11746996 | II | 37 | 13 | 69459533  |                   | 0.46 | 0.01197  | 1.92207 | 0.56569393 | 0.454230851 | 0.111  |
| cg20382493 | II | 37 | 13 | 114829170 | RASA3             | 0.54 | 0.0014   | 2.85345 | 0.70776427 | 0.818896529 | -0.111 |
| cg04206572 | II | 37 | 13 | 114888999 | RASA3             | 0.5  | 0.00432  | 2.36443 | 0.56068913 | 0.671472147 | -0.111 |
| cg20505457 | II | 37 | 14 | 69388953  | ACTN1;ACTN1;ACTI  | 0.46 | 0.01197  | 1.92207 | 0.7123084  | 0.60096756  | 0.111  |
| cg10530793 | II | 37 | 14 | 69821049  | GALNTL1;GALNTL1   | 0.42 | 0.02991  | 1.52413 | 0.56257814 | 0.451249454 | 0.111  |
| cg20385229 | II | 37 | 14 | 78175470  | ALKBH1;C14orf156  | 0.46 | 0.01197  | 1.92207 | 0.81685957 | 0.705491044 | 0.111  |
| cg26337624 | I  | 37 | 14 | 105350915 | KIAA0284;KIAA0284 | 0.46 | 0.01197  | 1.92207 | 0.94088318 | 0.829945673 | 0.111  |
| cg19928084 | II | 37 | 14 | 106855090 |                   | 0.5  | 0.00432  | 2.36443 | 0.73365216 | 0.62219765  | 0.111  |
| cg08369013 | II | 37 | 15 | 31693543  |                   | 0.42 | 0.02991  | 1.52413 | 0.76910602 | 0.657870771 | 0.111  |
| cg22107533 | II | 37 | 15 | 45028083  | TRIM69;TRIM69     | 0.42 | 0.02991  | 1.52413 | 0.42001519 | 0.531331497 | -0.111 |
| cg25045893 | II | 37 | 15 | 83777051  | TM6SF1;TM6SF1     | 0.46 | 0.01197  | 1.92207 | 0.16319584 | 0.274657645 | -0.111 |
| cg18569141 | I  | 37 | 15 | 90727995  | SEMA4B            | 0.5  | 0.00432  | 2.36443 | 0.31620835 | 0.205005034 | 0.111  |
| cg11143485 | II | 37 | 15 | 101499700 | LRRK1             | 0.58 | 0.00041  | 3.39184 | 0.2182857  | 0.329319699 | -0.111 |
| cg14237301 | II | 37 | 16 | 28506477  | APOB48R           | 0.46 | 0.01197  | 1.92207 | 0.722836   | 0.834053099 | -0.111 |
| cg26663590 | II | 37 | 16 | 28959310  |                   | 0.42 | 0.02991  | 1.52413 | 0.63782107 | 0.748440625 | -0.111 |
| cg27150412 | II | 37 | 16 | 31161431  | PRSS36            | 0.46 | 0.01197  | 1.92207 | 0.44861648 | 0.559701485 | -0.111 |
| cg23684449 | II | 37 | 16 | 46919194  | GPT2;GPT2;GPT2    | 0.5  | 0.00432  | 2.36443 | 0.43916722 | 0.549897205 | -0.111 |
| cg07957035 | II | 37 | 16 | 49623763  | ZNF423            | 0.62 | 0.0001   | 3.98291 | 0.74971763 | 0.860760412 | -0.111 |
| cg00366252 | II | 37 | 16 | 85436841  |                   | 0.58 | 0.00041  | 3.39184 | 0.35818144 | 0.469074746 | -0.111 |
| cg17442852 | II | 37 | 17 | 1478889   | SLC43A2           | 0.71 | 4.57E-06 | 5.34042 | 0.65966277 | 0.770585624 | -0.111 |
| cg19022525 | II | 37 | 17 | 40664917  | ATP6V0A1;ATP6V0A1 | 0.46 | 0.01197  | 1.92207 | 0.84908541 | 0.737681225 | 0.111  |
| cg19618279 | I  | 37 | 17 | 40715228  | COASY;COASY;COASY | 0.46 | 0.01197  | 1.92207 | 0.76818739 | 0.657218422 | 0.111  |
| cg14578363 | II | 37 | 17 | 42785078  | DBF4B;DBF4B       | 0.46 | 0.01197  | 1.92207 | 0.84964866 | 0.739087075 | 0.111  |
| cg23258611 | II | 37 | 17 | 70536160  |                   | 0.58 | 0.00041  | 3.39184 | 0.29136753 | 0.402487007 | -0.111 |
| cg16548154 | II | 37 | 17 | 74565757  | ST6GALNAC2        | 0.75 | 7.61E-07 | 6.11857 | 0.66924613 | 0.780257706 | -0.111 |
| cg13614440 | II | 37 | 17 | 76471012  | DNAH17            | 0.42 | 0.02991  | 1.52413 | 0.64720339 | 0.536102258 | 0.111  |
| cg21621482 | I  | 37 | 17 | 79228937  | SLC38A10;SLC38A10 | 0.5  | 0.00432  | 2.36443 | 0.4252592  | 0.536463354 | -0.111 |
| cg23596678 | II | 37 | 17 | 79793000  | DYSFIP1           | 0.62 | 0.0001   | 3.98291 | 0.702318   | 0.813732986 | -0.111 |

|            |    |    |    |                            |      |          |         |            |             |        |
|------------|----|----|----|----------------------------|------|----------|---------|------------|-------------|--------|
| cg24213719 | I  | 37 | 18 | 60263646                   | 0.54 | 0.0014   | 2.85345 | 0.04360374 | 0.154557228 | -0.111 |
| cg25264268 | I  | 37 | 19 | 427263 SHC2                | 0.5  | 0.00432  | 2.36443 | 0.7368548  | 0.848076166 | -0.111 |
| cg10746622 | II | 37 | 19 | 696946 PRSSL1              | 0.54 | 0.0014   | 2.85345 | 0.74976019 | 0.860972653 | -0.111 |
| cg02348462 | II | 37 | 19 | 807147 PTBP1;PTBP1;PTBP    | 0.46 | 0.01197  | 1.92207 | 0.65353521 | 0.764239158 | -0.111 |
| cg22372096 | I  | 37 | 19 | 3810782 ZFR2               | 0.5  | 0.00432  | 2.36443 | 0.60304073 | 0.492457489 | 0.111  |
| cg27552857 | I  | 37 | 19 | 4542866 SEMA6B             | 0.5  | 0.00432  | 2.36443 | 0.54287363 | 0.654130167 | -0.111 |
| cg21928095 | II | 37 | 19 | 36100748                   | 0.54 | 0.0014   | 2.85345 | 0.31817112 | 0.429113576 | -0.111 |
| cg14799446 | II | 37 | 19 | 47250607 FKRP;FKRP;STRN4;S | 0.46 | 0.01197  | 1.92207 | 0.78393357 | 0.672483578 | 0.111  |
| cg18655633 | II | 37 | 19 | 48107418                   | 0.42 | 0.02991  | 1.52413 | 0.58330986 | 0.472123702 | 0.111  |
| cg10783469 | I  | 37 | 19 | 52391234 ZNF577;ZNF577;ZN  | 0.42 | 0.02991  | 1.52413 | 0.29551842 | 0.407004137 | -0.111 |
| cg01477133 | II | 37 | 20 | 33878142 FAM83C            | 0.5  | 0.00432  | 2.36443 | 0.66552734 | 0.554550455 | 0.111  |
| cg20752831 | II | 37 | 20 | 43382731 RIMS4             | 0.46 | 0.01197  | 1.92207 | 0.74112458 | 0.630310188 | 0.111  |
| cg13209907 | II | 37 | 20 | 44260207 WFDC9             | 0.42 | 0.02991  | 1.52413 | 0.64803541 | 0.536584378 | 0.111  |
| cg17986701 | II | 37 | 20 | 44574422 PCIF1             | 0.71 | 4.57E-06 | 5.34042 | 0.64900524 | 0.760161506 | -0.111 |
| cg17283039 | I  | 37 | 22 | 29787625                   | 0.58 | 0.00041  | 3.39184 | 0.75671511 | 0.867524752 | -0.111 |
| cg15868105 | II | 37 | 22 | 30116953 CABP7             | 0.67 | 2.34E-05 | 4.63072 | 0.15452654 | 0.265828825 | -0.111 |
| cg01949002 | II | 37 | 1  | 2203589 SKI                | 0.62 | 0.0001   | 3.98291 | 0.69391896 | 0.804175134 | -0.11  |
| cg23666378 | I  | 37 | 1  | 3663164 KIAA0495;KIAA049!  | 0.58 | 0.00041  | 3.39184 | 0.44756876 | 0.337248552 | 0.11   |
| cg08926642 | I  | 37 | 1  | 7887455 PER3               | 0.46 | 0.01197  | 1.92207 | 0.90523873 | 0.795242676 | 0.11   |
| cg23228178 | II | 37 | 1  | 17633681 PADI4             | 0.46 | 0.01197  | 1.92207 | 0.59223625 | 0.482030374 | 0.11   |
| cg18196063 | II | 37 | 1  | 24652248 GRHL3;GRHL3;GRH   | 0.5  | 0.00432  | 2.36443 | 0.64992099 | 0.759462471 | -0.11  |
| cg16417374 | II | 37 | 1  | 26098310 MAN1C1            | 0.58 | 0.00041  | 3.39184 | 0.48018132 | 0.370484896 | 0.11   |
| cg01022916 | II | 37 | 1  | 31196938 MATN1             | 0.5  | 0.00432  | 2.36443 | 0.61887392 | 0.728505032 | -0.11  |
| cg26301690 | II | 37 | 1  | 50569610 ELAVL4;ELAVL4;ELA | 0.62 | 0.0001   | 3.98291 | 0.81612597 | 0.706089807 | 0.11   |
| cg10541466 | II | 37 | 1  | 113425263                  | 0.54 | 0.0014   | 2.85345 | 0.2613732  | 0.371036299 | -0.11  |
| cg22424746 | II | 37 | 1  | 117753313 VTCN1            | 0.5  | 0.00432  | 2.36443 | 0.73958838 | 0.630034857 | 0.11   |
| cg01076495 | II | 37 | 1  | 150480588 ECM1;ECM1;ECM1;  | 0.42 | 0.02991  | 1.52413 | 0.41381322 | 0.524194571 | -0.11  |
| cg20002843 | II | 37 | 1  | 204338373 LOC127841        | 0.58 | 0.00041  | 3.39184 | 0.36112742 | 0.471201936 | -0.11  |
| cg20680802 | II | 37 | 1  | 226299139                  | 0.54 | 0.0014   | 2.85345 | 0.31045976 | 0.200320604 | 0.11   |
| cg11915812 | II | 37 | 2  | 10554240 HPCAL1;HPCAL1     | 0.5  | 0.00432  | 2.36443 | 0.70166972 | 0.591798959 | 0.11   |
| cg03514843 | II | 37 | 2  | 27301195 EMILIN1           | 0.67 | 2.34E-05 | 4.63072 | 0.60613678 | 0.716477778 | -0.11  |
| cg14628982 | II | 37 | 2  | 28717630 PLB1;PLB1         | 0.54 | 0.0014   | 2.85345 | 0.8161954  | 0.706014417 | 0.11   |
| cg10954469 | I  | 37 | 2  | 71115370                   | 0.46 | 0.01197  | 1.92207 | 0.09630327 | 0.206431214 | -0.11  |

|            |    |    |   |           |                     |      |         |         |            |             |       |
|------------|----|----|---|-----------|---------------------|------|---------|---------|------------|-------------|-------|
| cg05036173 | II | 37 | 2 | 108994528 | SULT1C4;SULT1C4     | 0.58 | 0.00041 | 3.39184 | 0.16598016 | 0.275703551 | -0.11 |
| cg14966782 | II | 37 | 2 | 109812089 | SH3RF3              | 0.46 | 0.01197 | 1.92207 | 0.79437633 | 0.684575628 | 0.11  |
| cg08570243 | II | 37 | 2 | 110969853 | NCRNA00116          | 0.46 | 0.01197 | 1.92207 | 0.20064209 | 0.090500878 | 0.11  |
| cg14001664 | I  | 37 | 2 | 132088801 |                     | 0.46 | 0.01197 | 1.92207 | 0.12493955 | 0.23497203  | -0.11 |
| cg19275653 | II | 37 | 2 | 175532338 | WIPF1               | 0.5  | 0.00432 | 2.36443 | 0.23350275 | 0.343787276 | -0.11 |
| cg12001304 | II | 37 | 2 | 229045020 | SPHKAP;SPHKAP       | 0.46 | 0.01197 | 1.92207 | 0.16992972 | 0.279494333 | -0.11 |
| cg18267381 | II | 37 | 3 | 21792434  | ZNF385D;ZNF385D     | 0.46 | 0.01197 | 1.92207 | 0.19192799 | 0.301813479 | -0.11 |
| cg27588384 | II | 37 | 3 | 45674281  | LIMD1               | 0.42 | 0.02991 | 1.52413 | 0.66830084 | 0.778780594 | -0.11 |
| cg18644653 | II | 37 | 3 | 49696053  | BSN                 | 0.54 | 0.0014  | 2.85345 | 0.51785706 | 0.627966832 | -0.11 |
| cg18094261 | II | 37 | 3 | 52216318  |                     | 0.5  | 0.00432 | 2.36443 | 0.55442211 | 0.663937532 | -0.11 |
| cg01454951 | II | 37 | 3 | 71730677  | EIF4E3;EIF4E3;EIF4I | 0.42 | 0.02991 | 1.52413 | 0.2247531  | 0.334260658 | -0.11 |
| cg12807187 | II | 37 | 3 | 71778392  | EIF4E3;EIF4E3;EIF4I | 0.5  | 0.00432 | 2.36443 | 0.59606517 | 0.705745353 | -0.11 |
| cg00466268 | II | 37 | 3 | 164914621 | SLITRK3             | 0.46 | 0.01197 | 1.92207 | 0.17233868 | 0.282676264 | -0.11 |
| cg18171097 | I  | 37 | 3 | 169532134 |                     | 0.54 | 0.0014  | 2.85345 | 0.88397188 | 0.774387813 | 0.11  |
| cg24671330 | II | 37 | 3 | 193066097 | ATP13A5             | 0.46 | 0.01197 | 1.92207 | 0.66318049 | 0.553199133 | 0.11  |
| cg03567896 | II | 37 | 4 | 7067375   | GRPEL1              | 0.62 | 0.0001  | 3.98291 | 0.76101586 | 0.871023781 | -0.11 |
| cg03063309 | II | 37 | 4 | 24796919  | SOD3                | 0.58 | 0.00041 | 3.39184 | 0.77526929 | 0.665584588 | 0.11  |
| cg10227863 | II | 37 | 4 | 55120729  | PDGFRA              | 0.5  | 0.00432 | 2.36443 | 0.73479784 | 0.624624543 | 0.11  |
| cg01578875 | I  | 37 | 4 | 146804010 | ZNF827              | 0.54 | 0.0014  | 2.85345 | 0.8382896  | 0.728745878 | 0.11  |
| cg00499700 | II | 37 | 5 | 76116088  | F2RL1               | 0.46 | 0.01197 | 1.92207 | 0.28950313 | 0.399208746 | -0.11 |
| cg00840960 | II | 37 | 5 | 148034030 | HTR4;HTR4;HTR4;H    | 0.42 | 0.02991 | 1.52413 | 0.16494865 | 0.275118288 | -0.11 |
| cg16646054 | II | 37 | 5 | 150157726 | C5orf62             | 0.42 | 0.02991 | 1.52413 | 0.420409   | 0.530706266 | -0.11 |
| cg01603073 | I  | 37 | 5 | 176101928 |                     | 0.54 | 0.0014  | 2.85345 | 0.6655445  | 0.555158821 | 0.11  |
| cg00471059 | II | 37 | 5 | 179562620 | RASGEF1C            | 0.54 | 0.0014  | 2.85345 | 0.59425447 | 0.703877753 | -0.11 |
| cg02049405 | I  | 37 | 6 | 30095265  |                     | 0.42 | 0.02991 | 1.52413 | 0.5830787  | 0.47318748  | 0.11  |
| cg07981266 | II | 37 | 6 | 30720311  |                     | 0.46 | 0.01197 | 1.92207 | 0.18064219 | 0.290655263 | -0.11 |
| cg20371401 | I  | 37 | 6 | 31895493  | C2;C2;C2;C2         | 0.58 | 0.00041 | 3.39184 | 0.64565654 | 0.755817706 | -0.11 |
| cg23339482 | II | 37 | 6 | 32036278  | TNXB                | 0.54 | 0.0014  | 2.85345 | 0.7143397  | 0.604786265 | 0.11  |
| cg25636481 | II | 37 | 6 | 33241410  | RPS18               | 0.42 | 0.02991 | 1.52413 | 0.7569872  | 0.646547309 | 0.11  |
| cg09673807 | II | 37 | 6 | 33575719  |                     | 0.42 | 0.02991 | 1.52413 | 0.64699411 | 0.536520997 | 0.11  |
| cg12008034 | II | 37 | 6 | 33996580  | GRM4                | 0.54 | 0.0014  | 2.85345 | 0.61964502 | 0.509895346 | 0.11  |
| cg11870042 | II | 37 | 7 | 2060040   | MAD1L1;MAD1L1;M     | 0.58 | 0.00041 | 3.39184 | 0.45839032 | 0.568131296 | -0.11 |
| cg20336172 | I  | 37 | 7 | 2773782   | GNA12               | 0.5  | 0.00432 | 2.36443 | 0.30966514 | 0.419989341 | -0.11 |

|            |    |    |    |           |                   |      |         |         |            |             |       |
|------------|----|----|----|-----------|-------------------|------|---------|---------|------------|-------------|-------|
| cg06896909 | II | 37 | 7  | 19813297  | TMEM196           | 0.42 | 0.02991 | 1.52413 | 0.30587836 | 0.415723883 | -0.11 |
| cg06496272 | II | 37 | 7  | 22895283  | SNORD93           | 0.5  | 0.00432 | 2.36443 | 0.82585498 | 0.715727302 | 0.11  |
| cg02389949 | II | 37 | 7  | 30176264  | C7orf41           | 0.54 | 0.0014  | 2.85345 | 0.29567698 | 0.40587629  | -0.11 |
| cg12240237 | II | 37 | 7  | 73946402  | GTF2IRD1;GTF2IRD  | 0.42 | 0.02991 | 1.52413 | 0.80514439 | 0.695511381 | 0.11  |
| cg07719679 | II | 37 | 7  | 87936392  | STEAP4            | 0.54 | 0.0014  | 2.85345 | 0.18702273 | 0.296786899 | -0.11 |
| cg02327530 | II | 37 | 7  | 100091786 | C7orf51           | 0.5  | 0.00432 | 2.36443 | 0.24309924 | 0.35335783  | -0.11 |
| cg07428004 | II | 37 | 7  | 127912372 |                   | 0.54 | 0.0014  | 2.85345 | 0.44880156 | 0.558344678 | -0.11 |
| cg23299919 | I  | 37 | 7  | 157406096 | PTPRN2;PTPRN2;PT  | 0.42 | 0.02991 | 1.52413 | 0.26074221 | 0.37097743  | -0.11 |
| cg07461572 | II | 37 | 8  | 1955117   |                   | 0.5  | 0.00432 | 2.36443 | 0.71943758 | 0.829189528 | -0.11 |
| cg11919837 | II | 37 | 8  | 57350735  |                   | 0.42 | 0.02991 | 1.52413 | 0.6266168  | 0.736233543 | -0.11 |
| cg06617456 | II | 37 | 8  | 68864769  | PREX2;PREX2       | 0.54 | 0.0014  | 2.85345 | 0.08593606 | 0.195931969 | -0.11 |
| cg21399717 | II | 37 | 8  | 102263157 |                   | 0.42 | 0.02991 | 1.52413 | 0.3851581  | 0.275425195 | 0.11  |
| cg19352830 | II | 37 | 8  | 141599356 | EIF2C2;EIF2C2     | 0.54 | 0.0014  | 2.85345 | 0.70926053 | 0.599001298 | 0.11  |
| cg13985784 | I  | 37 | 9  | 25678015  | TUSC1             | 0.5  | 0.00432 | 2.36443 | 0.03859105 | 0.148306652 | -0.11 |
| cg05261759 | II | 37 | 9  | 130498309 | TOR2A;TOR2A;TOR   | 0.5  | 0.00432 | 2.36443 | 0.7288412  | 0.838490159 | -0.11 |
| cg00698575 | II | 37 | 9  | 140388604 | PNPLA7;PNPLA7     | 0.58 | 0.00041 | 3.39184 | 0.60404558 | 0.714457731 | -0.11 |
| cg25614935 | I  | 37 | 10 | 1084866   | C10orf110;C10orf1 | 0.58 | 0.00041 | 3.39184 | 0.88663334 | 0.777081225 | 0.11  |
| cg09105442 | I  | 37 | 10 | 1228439   | ADARB2            | 0.62 | 0.0001  | 3.98291 | 0.84912945 | 0.738749201 | 0.11  |
| cg09684112 | I  | 37 | 10 | 13701447  | FRMD4A            | 0.58 | 0.00041 | 3.39184 | 0.13945789 | 0.249648431 | -0.11 |
| cg11043993 | II | 37 | 10 | 50536966  |                   | 0.46 | 0.01197 | 1.92207 | 0.74415947 | 0.633939628 | 0.11  |
| cg07545081 | II | 37 | 10 | 126308381 | FAM53B            | 0.46 | 0.01197 | 1.92207 | 0.66214118 | 0.552097393 | 0.11  |
| cg05098512 | I  | 37 | 10 | 134861083 |                   | 0.54 | 0.0014  | 2.85345 | 0.86647746 | 0.756612797 | 0.11  |
| cg16638248 | II | 37 | 11 | 10596059  | MRV11;MRV11;MRV   | 0.42 | 0.02991 | 1.52413 | 0.73538585 | 0.625032827 | 0.11  |
| cg24453664 | II | 37 | 11 | 33758413  | CD59;CD59;CD59;C  | 0.42 | 0.02991 | 1.52413 | 0.21724933 | 0.326807899 | -0.11 |
| cg09554856 | II | 37 | 11 | 33914646  | LMO2              | 0.42 | 0.02991 | 1.52413 | 0.24828867 | 0.358293776 | -0.11 |
| cg17338544 | II | 37 | 11 | 44559989  |                   | 0.54 | 0.0014  | 2.85345 | 0.54203409 | 0.65160219  | -0.11 |
| cg10460350 | II | 37 | 11 | 60658361  | PRPF19            | 0.54 | 0.0014  | 2.85345 | 0.35466273 | 0.465083648 | -0.11 |
| cg14654385 | II | 37 | 11 | 63973006  | FERMT3;FERMT3     | 0.54 | 0.0014  | 2.85345 | 0.36641494 | 0.476867936 | -0.11 |
| cg22330021 | II | 37 | 11 | 64372277  |                   | 0.46 | 0.01197 | 1.92207 | 0.73733178 | 0.627134015 | 0.11  |
| cg00509451 | I  | 37 | 11 | 64811775  | SAC3D1            | 0.58 | 0.00041 | 3.39184 | 0.82773403 | 0.93726647  | -0.11 |
| cg01522592 | II | 37 | 11 | 75235311  | GDPD5             | 0.46 | 0.01197 | 1.92207 | 0.59528994 | 0.484961415 | 0.11  |
| cg07237926 | II | 37 | 11 | 117857630 | IL10RA;IL10RA     | 0.58 | 0.00041 | 3.39184 | 0.51386559 | 0.404206565 | 0.11  |
| cg14081270 | II | 37 | 11 | 118286105 |                   | 0.46 | 0.01197 | 1.92207 | 0.24371584 | 0.354051003 | -0.11 |

|            |    |    |    |                           |      |          |         |            |             |       |
|------------|----|----|----|---------------------------|------|----------|---------|------------|-------------|-------|
| cg04176122 | II | 37 | 11 | 118779835 BCL9L           | 0.54 | 0.0014   | 2.85345 | 0.54133527 | 0.431069828 | 0.11  |
| cg20306694 | II | 37 | 12 | 51718251 BIN2             | 0.42 | 0.02991  | 1.52413 | 0.43413179 | 0.543781895 | -0.11 |
| cg23060047 | II | 37 | 12 | 130819504                 | 0.5  | 0.00432  | 2.36443 | 0.33352507 | 0.443662961 | -0.11 |
| cg24425149 | II | 37 | 13 | 75991251 TBC1D4           | 0.54 | 0.0014   | 2.85345 | 0.33750473 | 0.447599298 | -0.11 |
| cg00046899 | II | 37 | 13 | 97777690                  | 0.46 | 0.01197  | 1.92207 | 0.56710904 | 0.456906035 | 0.11  |
| cg03950873 | II | 37 | 14 | 60045040 C14orf38         | 0.5  | 0.00432  | 2.36443 | 0.80677664 | 0.696662195 | 0.11  |
| cg05062889 | II | 37 | 16 | 687414 C16orf13;C16orf13  | 0.5  | 0.00432  | 2.36443 | 0.16597605 | 0.276164627 | -0.11 |
| cg05895403 | II | 37 | 16 | 31150380 PRSS36           | 0.54 | 0.0014   | 2.85345 | 0.58380174 | 0.694258122 | -0.11 |
| cg07223266 | II | 37 | 16 | 33961872                  | 0.62 | 0.0001   | 3.98291 | 0.44614574 | 0.556090578 | -0.11 |
| cg06256596 | II | 37 | 16 | 66511944 BEAN             | 0.5  | 0.00432  | 2.36443 | 0.43295978 | 0.322795727 | 0.11  |
| cg07285481 | II | 37 | 16 | 81667167 CMIP;CMIP        | 0.58 | 0.00041  | 3.39184 | 0.66237752 | 0.772254331 | -0.11 |
| cg03834411 | I  | 37 | 16 | 87682036 JPH3             | 0.42 | 0.02991  | 1.52413 | 0.79588897 | 0.685773032 | 0.11  |
| cg07983907 | I  | 37 | 16 | 88697947 ZC3H18           | 0.58 | 0.00041  | 3.39184 | 0.6500288  | 0.760163458 | -0.11 |
| cg06419432 | II | 37 | 17 | 25707535                  | 0.42 | 0.02991  | 1.52413 | 0.20039019 | 0.310021619 | -0.11 |
| cg13487284 | II | 37 | 17 | 26794878                  | 0.62 | 0.0001   | 3.98291 | 0.44420269 | 0.554436339 | -0.11 |
| cg11826961 | II | 37 | 17 | 38221639 THRA;THRA        | 0.71 | 4.57E-06 | 5.34042 | 0.5168505  | 0.627251748 | -0.11 |
| cg01512089 | II | 37 | 17 | 41705043                  | 0.58 | 0.00041  | 3.39184 | 0.44575013 | 0.556150347 | -0.11 |
| cg03661110 | II | 37 | 17 | 48581622                  | 0.5  | 0.00432  | 2.36443 | 0.29875367 | 0.409204863 | -0.11 |
| cg08034797 | II | 37 | 17 | 75306498 SEPT9;SEPT9      | 0.62 | 0.0001   | 3.98291 | 0.84456536 | 0.734662451 | 0.11  |
| cg02802072 | II | 37 | 17 | 79229124 SLC38A10;SLC38A1 | 0.5  | 0.00432  | 2.36443 | 0.36290974 | 0.473148795 | -0.11 |
| cg17616192 | II | 37 | 17 | 80009015 GPS1;RFNG;GPS1   | 0.67 | 2.34E-05 | 4.63072 | 0.60396456 | 0.714183011 | -0.11 |
| cg12549345 | II | 37 | 19 | 2789453 THOP1             | 0.46 | 0.01197  | 1.92207 | 0.7135368  | 0.603615611 | 0.11  |
| cg01032675 | I  | 37 | 19 | 3136430 GNA15;GNA15       | 0.42 | 0.02991  | 1.52413 | 0.11180519 | 0.22174284  | -0.11 |
| cg07685563 | II | 37 | 19 | 4954869 UHRF1;UHRF1       | 0.58 | 0.00041  | 3.39184 | 0.74593425 | 0.855968254 | -0.11 |
| cg02577963 | I  | 37 | 19 | 5041570 KDM4B             | 0.54 | 0.0014   | 2.85345 | 0.7987819  | 0.908679393 | -0.11 |
| cg24911113 | I  | 37 | 19 | 23185714                  | 0.42 | 0.02991  | 1.52413 | 0.31942955 | 0.429911945 | -0.11 |
| cg25717032 | II | 37 | 19 | 35981549 KRTDAP           | 0.46 | 0.01197  | 1.92207 | 0.37078686 | 0.481060333 | -0.11 |
| cg18788725 | II | 37 | 19 | 45512122 RELB             | 0.46 | 0.01197  | 1.92207 | 0.6801198  | 0.789853197 | -0.11 |
| cg22027879 | II | 37 | 19 | 49469965 FTL              | 0.5  | 0.00432  | 2.36443 | 0.76771245 | 0.877860263 | -0.11 |
| cg08318732 | II | 37 | 19 | 53192577 ZNF83            | 0.62 | 0.0001   | 3.98291 | 0.5249892  | 0.635059256 | -0.11 |
| cg20038038 | I  | 37 | 19 | 54804217 LILRA3;LILRA3    | 0.5  | 0.00432  | 2.36443 | 0.4798403  | 0.589569327 | -0.11 |
| cg12338552 | II | 37 | 20 | 690915                    | 0.42 | 0.02991  | 1.52413 | 0.19132583 | 0.301360107 | -0.11 |
| cg07676859 | I  | 37 | 20 | 23015932 SSTR4            | 0.46 | 0.01197  | 1.92207 | 0.21317459 | 0.322929519 | -0.11 |

|            |    |    |    |                               |      |          |         |            |             |        |
|------------|----|----|----|-------------------------------|------|----------|---------|------------|-------------|--------|
| cg01371631 | II | 37 | 20 | 57267176 NPEPL1               | 0.67 | 2.34E-05 | 4.63072 | 0.64716886 | 0.757333522 | -0.11  |
| cg00673191 | II | 37 | 21 | 37536923 DOPEY2               | 0.54 | 0.0014   | 2.85345 | 0.70308931 | 0.81268621  | -0.11  |
| cg05949181 | II | 37 | 22 | 39154591                      | 0.67 | 2.34E-05 | 4.63072 | 0.79831993 | 0.68818847  | 0.11   |
| cg15911859 | I  | 37 | 22 | 45810043 RIBC2;SMC1B          | 0.5  | 0.00432  | 2.36443 | 0.17572019 | 0.286105636 | -0.11  |
| cg05392448 | I  | 37 | 1  | 2266933 MORN1                 | 0.67 | 2.34E-05 | 4.63072 | 0.91427673 | 0.804849005 | 0.109  |
| cg11226808 | II | 37 | 1  | 3581320 TP73                  | 0.46 | 0.01197  | 1.92207 | 0.75775351 | 0.64826027  | 0.109  |
| cg00534163 | II | 37 | 1  | 3740120 KIAA0562              | 0.46 | 0.01197  | 1.92207 | 0.77289711 | 0.882072854 | -0.109 |
| cg04438595 | I  | 37 | 1  | 16176425 SPEN                 | 0.46 | 0.01197  | 1.92207 | 0.35910968 | 0.250602411 | 0.109  |
| cg27513684 | I  | 37 | 1  | 27729053                      | 0.46 | 0.01197  | 1.92207 | 0.29774009 | 0.406474278 | -0.109 |
| cg07570723 | II | 37 | 1  | 39875238 KIAA0754;KIAA0754    | 0.46 | 0.01197  | 1.92207 | 0.17560054 | 0.284475465 | -0.109 |
| cg04718492 | II | 37 | 1  | 117753741 VTCN1               | 0.58 | 0.00041  | 3.39184 | 0.80054629 | 0.691479087 | 0.109  |
| cg18002437 | II | 37 | 1  | 144522237 LOC728875           | 0.58 | 0.00041  | 3.39184 | 0.60982368 | 0.500392003 | 0.109  |
| cg02459569 | II | 37 | 1  | 150944634 LASS2;LASS2         | 0.58 | 0.00041  | 3.39184 | 0.60584199 | 0.714922398 | -0.109 |
| cg15690542 | II | 37 | 1  | 151172905 PIP5K1A;PIP5K1A;P   | 0.54 | 0.0014   | 2.85345 | 0.68117278 | 0.572364044 | 0.109  |
| cg12473916 | II | 37 | 1  | 154943651 SHC1;SHC1;SHC1;SHC1 | 0.54 | 0.0014   | 2.85345 | 0.28884169 | 0.397541695 | -0.109 |
| cg15487646 | II | 37 | 1  | 181077141                     | 0.46 | 0.01197  | 1.92207 | 0.5949666  | 0.485547851 | 0.109  |
| cg17954152 | II | 37 | 1  | 214160860 PROX1               | 0.67 | 2.34E-05 | 4.63072 | 0.08806765 | 0.196797821 | -0.109 |
| cg09699787 | II | 37 | 2  | 1711759 PXDN                  | 0.42 | 0.02991  | 1.52413 | 0.31548531 | 0.424174252 | -0.109 |
| cg21484315 | II | 37 | 2  | 2712669                       | 0.42 | 0.02991  | 1.52413 | 0.73098869 | 0.621785317 | 0.109  |
| cg23422170 | II | 37 | 2  | 10345003 C2orf48              | 0.67 | 2.34E-05 | 4.63072 | 0.64253173 | 0.751788637 | -0.109 |
| cg12655542 | II | 37 | 2  | 20357306                      | 0.46 | 0.01197  | 1.92207 | 0.26949249 | 0.378345776 | -0.109 |
| cg06481517 | II | 37 | 2  | 49084769                      | 0.54 | 0.0014   | 2.85345 | 0.65578051 | 0.546349162 | 0.109  |
| cg09404516 | II | 37 | 2  | 54832147 SPTBN1;SPTBN1        | 0.54 | 0.0014   | 2.85345 | 0.21343679 | 0.322674954 | -0.109 |
| cg20175390 | II | 37 | 2  | 119599459                     | 0.5  | 0.00432  | 2.36443 | 0.20281071 | 0.311390415 | -0.109 |
| cg24544177 | II | 37 | 2  | 237771837                     | 0.5  | 0.00432  | 2.36443 | 0.79482799 | 0.686113666 | 0.109  |
| cg14208102 | II | 37 | 3  | 48507165 TREX1;TREX1          | 0.54 | 0.0014   | 2.85345 | 0.19191579 | 0.301128129 | -0.109 |
| cg14852276 | II | 37 | 3  | 197684729 IQCG                | 0.54 | 0.0014   | 2.85345 | 0.8062539  | 0.915526922 | -0.109 |
| cg20092199 | II | 37 | 4  | 1342459 KIAA1530              | 0.46 | 0.01197  | 1.92207 | 0.65370557 | 0.762318442 | -0.109 |
| cg14882700 | I  | 37 | 4  | 4228571 OTOP1                 | 0.46 | 0.01197  | 1.92207 | 0.23962819 | 0.348604445 | -0.109 |
| cg26296488 | I  | 37 | 4  | 9783192 DRD5                  | 0.42 | 0.02991  | 1.52413 | 0.27306643 | 0.382125147 | -0.109 |
| cg20971045 | II | 37 | 5  | 53075687                      | 0.54 | 0.0014   | 2.85345 | 0.25287332 | 0.361699961 | -0.109 |
| cg20536364 | II | 37 | 5  | 55790102                      | 0.46 | 0.01197  | 1.92207 | 0.65686767 | 0.76627031  | -0.109 |
| cg15538767 | II | 37 | 5  | 149870395                     | 0.46 | 0.01197  | 1.92207 | 0.438731   | 0.547917162 | -0.109 |

|            |    |    |    |           |                      |      |          |         |            |             |        |
|------------|----|----|----|-----------|----------------------|------|----------|---------|------------|-------------|--------|
| cg00059225 | II | 37 | 5  | 151304357 | GLRA1;GLRA1;GLRA1    | 0.62 | 0.0001   | 3.98291 | 0.36082643 | 0.470324098 | -0.109 |
| cg22570970 | I  | 37 | 6  | 15401067  | JARID2               | 0.54 | 0.0014   | 2.85345 | 0.34033625 | 0.449590839 | -0.109 |
| cg26888012 | II | 37 | 6  | 31091383  | PSORS1C1             | 0.42 | 0.02991  | 1.52413 | 0.7230028  | 0.614457902 | 0.109  |
| cg19367859 | II | 37 | 6  | 31529897  |                      | 0.46 | 0.01197  | 1.92207 | 0.69496849 | 0.586026057 | 0.109  |
| cg14324675 | II | 37 | 6  | 31554848  | LST1;LST1;LST1;LST1  | 0.54 | 0.0014   | 2.85345 | 0.26762229 | 0.37678452  | -0.109 |
| cg04567302 | II | 37 | 6  | 31846956  | SLC44A4              | 0.54 | 0.0014   | 2.85345 | 0.6526586  | 0.761807727 | -0.109 |
| cg21232620 | II | 37 | 6  | 78172192  | HTR1B                | 0.54 | 0.0014   | 2.85345 | 0.24125746 | 0.349907594 | -0.109 |
| cg02461269 | II | 37 | 6  | 156509874 |                      | 0.42 | 0.02991  | 1.52413 | 0.31239135 | 0.421196878 | -0.109 |
| cg16298927 | II | 37 | 6  | 170191076 | C6orf122;C6orf208    | 0.54 | 0.0014   | 2.85345 | 0.63935772 | 0.748500879 | -0.109 |
| cg04109092 | I  | 37 | 7  | 2647852   | IQCE;IQCE            | 0.58 | 0.00041  | 3.39184 | 0.48203729 | 0.59058587  | -0.109 |
| cg13034073 | II | 37 | 7  | 2769681   | GNA12                | 0.58 | 0.00041  | 3.39184 | 0.38888203 | 0.498282841 | -0.109 |
| cg09832443 | II | 37 | 7  | 28612680  | CREB5;CREB5;CREB5    | 0.5  | 0.00432  | 2.36443 | 0.74420985 | 0.635542881 | 0.109  |
| cg00486143 | II | 37 | 7  | 127774154 |                      | 0.46 | 0.01197  | 1.92207 | 0.30391026 | 0.413398089 | -0.109 |
| cg16456596 | II | 37 | 8  | 8313504   |                      | 0.5  | 0.00432  | 2.36443 | 0.58312747 | 0.692297813 | -0.109 |
| cg21163717 | I  | 37 | 8  | 21769903  | DOK2                 | 0.42 | 0.02991  | 1.52413 | 0.75098981 | 0.641755818 | 0.109  |
| cg16142218 | II | 37 | 8  | 23101221  | CHMP7;CHMP7          | 0.5  | 0.00432  | 2.36443 | 0.31384067 | 0.204808568 | 0.109  |
| cg03922423 | II | 37 | 8  | 144408588 | TOP1MT               | 0.67 | 2.34E-05 | 4.63072 | 0.43515754 | 0.543829885 | -0.109 |
| cg22082046 | II | 37 | 9  | 19934447  |                      | 0.42 | 0.02991  | 1.52413 | 0.21288483 | 0.321437417 | -0.109 |
| cg13842639 | I  | 37 | 9  | 38488083  |                      | 0.42 | 0.02991  | 1.52413 | 0.69087214 | 0.800139887 | -0.109 |
| cg16112945 | II | 37 | 9  | 136285806 | ADAMTS13;ADAMTS13    | 0.42 | 0.02991  | 1.52413 | 0.61521411 | 0.505888472 | 0.109  |
| cg17112382 | II | 37 | 10 | 21676930  |                      | 0.58 | 0.00041  | 3.39184 | 0.80412879 | 0.695477715 | 0.109  |
| cg24445116 | II | 37 | 10 | 48523589  |                      | 0.46 | 0.01197  | 1.92207 | 0.78984292 | 0.680602023 | 0.109  |
| cg13344587 | II | 37 | 10 | 63723919  | ARID5B               | 0.46 | 0.01197  | 1.92207 | 0.54745856 | 0.438328089 | 0.109  |
| cg12147622 | II | 37 | 10 | 74021432  |                      | 0.5  | 0.00432  | 2.36443 | 0.60041831 | 0.491597541 | 0.109  |
| cg14568203 | II | 37 | 10 | 79931578  |                      | 0.46 | 0.01197  | 1.92207 | 0.78273663 | 0.674083677 | 0.109  |
| cg24168991 | II | 37 | 10 | 106078922 | ITPR1P               | 0.54 | 0.0014   | 2.85345 | 0.77344673 | 0.882193785 | -0.109 |
| cg03510732 | II | 37 | 10 | 114871931 | TCF7L2;TCF7L2;TCF7L2 | 0.46 | 0.01197  | 1.92207 | 0.83920169 | 0.729988132 | 0.109  |
| cg10858945 | II | 37 | 10 | 116528318 |                      | 0.58 | 0.00041  | 3.39184 | 0.2158781  | 0.324446978 | -0.109 |
| cg01160452 | II | 37 | 10 | 118957098 | KCNK18               | 0.46 | 0.01197  | 1.92207 | 0.69180157 | 0.582644014 | 0.109  |
| cg02695567 | I  | 37 | 10 | 134728488 |                      | 0.46 | 0.01197  | 1.92207 | 0.56336833 | 0.453878342 | 0.109  |
| cg07047068 | II | 37 | 11 | 844686    | TSPAN4;TSPAN4;TSPAN4 | 0.54 | 0.0014   | 2.85345 | 0.18110023 | 0.289660177 | -0.109 |
| cg18311341 | II | 37 | 11 | 7693674   | CYB5R2               | 0.42 | 0.02991  | 1.52413 | 0.8385034  | 0.729582924 | 0.109  |
| cg23195547 | II | 37 | 11 | 8740646   | ST5;ST5;ST5          | 0.5  | 0.00432  | 2.36443 | 0.67636576 | 0.785515972 | -0.109 |

|            |    |    |    |                            |      |          |         |            |             |        |
|------------|----|----|----|----------------------------|------|----------|---------|------------|-------------|--------|
| cg11986385 | II | 37 | 11 | 19628828 NAV2              | 0.5  | 0.00432  | 2.36443 | 0.70962843 | 0.600490718 | 0.109  |
| cg13974632 | I  | 37 | 11 | 27740813 BDNF;BDNF;BDNF;f  | 0.46 | 0.01197  | 1.92207 | 0.1509558  | 0.259877012 | -0.109 |
| cg03732020 | I  | 37 | 11 | 47282968 NR1H3;NR1H3;NR1   | 0.5  | 0.00432  | 2.36443 | 0.59752009 | 0.706118009 | -0.109 |
| cg06917325 | II | 37 | 11 | 62783123 SLC22A8           | 0.54 | 0.0014   | 2.85345 | 0.83642894 | 0.727905926 | 0.109  |
| cg20930290 | II | 37 | 11 | 64138764 RPS6KA4;RPS6KA4   | 0.54 | 0.0014   | 2.85345 | 0.40432579 | 0.513051045 | -0.109 |
| cg09982224 | II | 37 | 11 | 67775972 ALDH3B1           | 0.46 | 0.01197  | 1.92207 | 0.35364595 | 0.463078635 | -0.109 |
| cg23423933 | II | 37 | 11 | 70269613 CTTN;CTTN         | 0.42 | 0.02991  | 1.52413 | 0.7730414  | 0.66407527  | 0.109  |
| cg03780927 | I  | 37 | 11 | 118781150 BCL9L;BCL9L      | 0.42 | 0.02991  | 1.52413 | 0.31610244 | 0.425397112 | -0.109 |
| cg09971562 | II | 37 | 11 | 128694679                  | 0.42 | 0.02991  | 1.52413 | 0.48944346 | 0.59853986  | -0.109 |
| cg23378074 | I  | 37 | 12 | 30947871                   | 0.5  | 0.00432  | 2.36443 | 0.70794065 | 0.817008667 | -0.109 |
| cg23126152 | II | 37 | 12 | 109221407 SSH1;SSH1;SSH1   | 0.54 | 0.0014   | 2.85345 | 0.66343761 | 0.772930757 | -0.109 |
| cg05939560 | II | 37 | 12 | 131003775 RIMBP2           | 0.54 | 0.0014   | 2.85345 | 0.4930074  | 0.384037757 | 0.109  |
| cg01692110 | II | 37 | 13 | 113365389 ATP11A;ATP11A    | 0.42 | 0.02991  | 1.52413 | 0.75210248 | 0.643067976 | 0.109  |
| cg23620184 | II | 37 | 14 | 23772616 PPP1R3E           | 0.46 | 0.01197  | 1.92207 | 0.72698083 | 0.617566759 | 0.109  |
| cg13803234 | II | 37 | 14 | 68830813 RAD51L1;RAD51L1;  | 0.62 | 0.0001   | 3.98291 | 0.50910425 | 0.617698134 | -0.109 |
| cg04738877 | II | 37 | 14 | 88459963 GALC;GALC         | 0.54 | 0.0014   | 2.85345 | 0.88901661 | 0.780138144 | 0.109  |
| cg04189326 | II | 37 | 14 | 103481271 CDC42BPB         | 0.5  | 0.00432  | 2.36443 | 0.37503142 | 0.484382483 | -0.109 |
| cg16420200 | I  | 37 | 14 | 106173779                  | 0.42 | 0.02991  | 1.52413 | 0.85321037 | 0.743960888 | 0.109  |
| cg00493389 | II | 37 | 15 | 41050377                   | 0.5  | 0.00432  | 2.36443 | 0.74372486 | 0.635116996 | 0.109  |
| cg09555736 | II | 37 | 16 | 474271 RAB11FIP3           | 0.46 | 0.01197  | 1.92207 | 0.65205152 | 0.761440683 | -0.109 |
| cg00472758 | II | 37 | 16 | 2552820 TBC1D24            | 0.5  | 0.00432  | 2.36443 | 0.70806203 | 0.817308849 | -0.109 |
| cg04735948 | II | 37 | 16 | 4661664 FAM100A            | 0.58 | 0.00041  | 3.39184 | 0.6127465  | 0.72191435  | -0.109 |
| cg26709300 | II | 37 | 16 | 30106682 YPEL3;YPEL3       | 0.62 | 0.0001   | 3.98291 | 0.52930536 | 0.419810327 | 0.109  |
| cg00596184 | II | 37 | 16 | 69350052 VPS4A             | 0.46 | 0.01197  | 1.92207 | 0.71467466 | 0.823853063 | -0.109 |
| cg05830220 | II | 37 | 16 | 87757033 KLHDC4            | 0.42 | 0.02991  | 1.52413 | 0.71085092 | 0.601765088 | 0.109  |
| cg04252928 | II | 37 | 16 | 89168599 ACSF3;ACSF3;ACSF3 | 0.54 | 0.0014   | 2.85345 | 0.61629742 | 0.724983382 | -0.109 |
| cg01097406 | II | 37 | 16 | 89675127                   | 0.42 | 0.02991  | 1.52413 | 0.40765098 | 0.516823716 | -0.109 |
| cg09464268 | II | 37 | 17 | 32266 DOC2B                | 0.67 | 2.34E-05 | 4.63072 | 0.64091986 | 0.750197056 | -0.109 |
| cg01438467 | I  | 37 | 17 | 1510080 SLC43A2            | 0.42 | 0.02991  | 1.52413 | 0.84012045 | 0.730623867 | 0.109  |
| cg12065777 | II | 37 | 17 | 16311838                   | 0.46 | 0.01197  | 1.92207 | 0.34416869 | 0.453063804 | -0.109 |
| cg15269394 | II | 37 | 17 | 40672083 ATP6VOA1;ATP6VO1  | 0.5  | 0.00432  | 2.36443 | 0.69229792 | 0.801168916 | -0.109 |
| cg20810975 | II | 37 | 17 | 42467199 ITGA2B            | 0.54 | 0.0014   | 2.85345 | 0.25373678 | 0.362812371 | -0.109 |
| cg12223258 | II | 37 | 17 | 43117026 DCAKD;DCAKD       | 0.5  | 0.00432  | 2.36443 | 0.53073561 | 0.422133211 | 0.109  |

|            |    |    |    |                          |      |          |         |            |             |        |
|------------|----|----|----|--------------------------|------|----------|---------|------------|-------------|--------|
| cg14154330 | II | 37 | 17 | 43503401 ARHGAP27        | 0.67 | 2.34E-05 | 4.63072 | 0.53714099 | 0.645766843 | -0.109 |
| cg24958366 | II | 37 | 17 | 46952555                 | 0.46 | 0.01197  | 1.92207 | 0.29988356 | 0.409094913 | -0.109 |
| cg27210390 | II | 37 | 17 | 52978583 TOM1L1          | 0.54 | 0.0014   | 2.85345 | 0.46450034 | 0.573824245 | -0.109 |
| cg03554335 | II | 37 | 17 | 62075151 C17orf72        | 0.58 | 0.00041  | 3.39184 | 0.43088093 | 0.540109401 | -0.109 |
| cg21441211 | II | 37 | 17 | 71313862                 | 0.46 | 0.01197  | 1.92207 | 0.81110649 | 0.702396765 | 0.109  |
| cg05727573 | I  | 37 | 17 | 74557104 SNORD1A;SNORD11 | 0.46 | 0.01197  | 1.92207 | 0.34514284 | 0.454504424 | -0.109 |
| cg22669656 | II | 37 | 17 | 76386825 PGS1            | 0.46 | 0.01197  | 1.92207 | 0.70471107 | 0.596202591 | 0.109  |
| cg01681525 | II | 37 | 17 | 79374741 BAHCC1          | 0.54 | 0.0014   | 2.85345 | 0.5021829  | 0.611154935 | -0.109 |
| cg26828842 | II | 37 | 18 | 67952086                 | 0.42 | 0.02991  | 1.52413 | 0.43710592 | 0.546248557 | -0.109 |
| cg01963696 | II | 37 | 19 | 851650 ELANE             | 0.5  | 0.00432  | 2.36443 | 0.62876546 | 0.738067705 | -0.109 |
| cg22900607 | I  | 37 | 19 | 2546938 GNG7             | 0.5  | 0.00432  | 2.36443 | 0.75505727 | 0.864539143 | -0.109 |
| cg16242615 | II | 37 | 19 | 4059988 ZBTB7A           | 0.42 | 0.02991  | 1.52413 | 0.43400573 | 0.542640284 | -0.109 |
| cg07375851 | II | 37 | 19 | 15591424 PGLYRP2         | 0.42 | 0.02991  | 1.52413 | 0.76204752 | 0.653312635 | 0.109  |
| cg01442620 | II | 37 | 19 | 33162885 ANKRD27         | 0.67 | 2.34E-05 | 4.63072 | 0.16441149 | 0.273605822 | -0.109 |
| cg27087650 | II | 37 | 19 | 45255796 BCL3            | 0.46 | 0.01197  | 1.92207 | 0.22334019 | 0.114054474 | 0.109  |
| cg21456083 | II | 37 | 19 | 49524256                 | 0.54 | 0.0014   | 2.85345 | 0.30132563 | 0.192144653 | 0.109  |
| cg06538141 | II | 37 | 20 | 30229335 COX4I2          | 0.42 | 0.02991  | 1.52413 | 0.73405249 | 0.62516928  | 0.109  |
| cg17775490 | II | 37 | 20 | 45179354 C20orf123       | 0.42 | 0.02991  | 1.52413 | 0.19873948 | 0.308189831 | -0.109 |
| cg14172108 | I  | 37 | 21 | 34405553                 | 0.58 | 0.00041  | 3.39184 | 0.5593371  | 0.450648441 | 0.109  |
| cg03392571 | II | 37 | 21 | 46367939 C21orf70        | 0.54 | 0.0014   | 2.85345 | 0.63891773 | 0.747562701 | -0.109 |
| cg07685786 | II | 37 | 21 | 48025691 S100B           | 0.46 | 0.01197  | 1.92207 | 0.58928275 | 0.69801605  | -0.109 |
| cg26986147 | II | 37 | 22 | 30957711 GAL3ST1         | 0.58 | 0.00041  | 3.39184 | 0.42630801 | 0.535565504 | -0.109 |
| cg20330126 | II | 37 | 22 | 36125053 APOL5           | 0.5  | 0.00432  | 2.36443 | 0.68854498 | 0.579074609 | 0.109  |
| cg01285652 | II | 37 | 22 | 50902555 SBF1            | 0.42 | 0.02991  | 1.52413 | 0.69402987 | 0.585445208 | 0.109  |
| cg04562757 | II | 37 | 1  | 17882998 ARHGEF10L       | 0.5  | 0.00432  | 2.36443 | 0.74455359 | 0.636923069 | 0.108  |
| cg27552711 | I  | 37 | 1  | 27332282 FAM46B          | 0.58 | 0.00041  | 3.39184 | 0.72571362 | 0.833934694 | -0.108 |
| cg11529819 | II | 37 | 1  | 27695677 FCN3;FCN3       | 0.58 | 0.00041  | 3.39184 | 0.29245136 | 0.400179222 | -0.108 |
| cg08857221 | II | 37 | 1  | 37941361 ZC3H12A         | 0.5  | 0.00432  | 2.36443 | 0.58857104 | 0.480843062 | 0.108  |
| cg00778190 | II | 37 | 1  | 95068029                 | 0.5  | 0.00432  | 2.36443 | 0.16101445 | 0.269407816 | -0.108 |
| cg07906625 | II | 37 | 1  | 145021703 PDE4DIP        | 0.46 | 0.01197  | 1.92207 | 0.32868756 | 0.437048167 | -0.108 |
| cg00006397 | II | 37 | 1  | 160336699 NHLH1          | 0.46 | 0.01197  | 1.92207 | 0.75121579 | 0.643290631 | 0.108  |
| cg14031054 | II | 37 | 1  | 164681652 PBX1           | 0.58 | 0.00041  | 3.39184 | 0.26407247 | 0.371729668 | -0.108 |
| cg04391048 | II | 37 | 2  | 18766022 NT5C1B;NT5C1B   | 0.46 | 0.01197  | 1.92207 | 0.56508518 | 0.673535253 | -0.108 |

|            |    |    |    |           |                    |      |         |         |            |             |        |
|------------|----|----|----|-----------|--------------------|------|---------|---------|------------|-------------|--------|
| cg23401251 | II | 37 | 2  | 27683905  | IFT172             | 0.5  | 0.00432 | 2.36443 | 0.65480236 | 0.762883124 | -0.108 |
| cg02646394 | I  | 37 | 2  | 89065379  | FLJ40330           | 0.62 | 0.0001  | 3.98291 | 0.38900275 | 0.280746261 | 0.108  |
| cg00790071 | II | 37 | 2  | 102731407 |                    | 0.62 | 0.0001  | 3.98291 | 0.52826836 | 0.635849229 | -0.108 |
| cg02256105 | II | 37 | 2  | 118593478 |                    | 0.42 | 0.02991 | 1.52413 | 0.53928835 | 0.647603872 | -0.108 |
| cg01420564 | II | 37 | 2  | 179076804 | OSBPL6             | 0.58 | 0.00041 | 3.39184 | 0.76350763 | 0.655646241 | 0.108  |
| cg02234120 | II | 37 | 2  | 234626351 | UGT1A10;UGT1A6;    | 0.5  | 0.00432 | 2.36443 | 0.81671685 | 0.708728097 | 0.108  |
| cg16869108 | II | 37 | 3  | 10184319  | VHL;VHL            | 0.46 | 0.01197 | 1.92207 | 0.76430057 | 0.656163357 | 0.108  |
| cg03565274 | II | 37 | 3  | 50629708  |                    | 0.5  | 0.00432 | 2.36443 | 0.45191112 | 0.559744899 | -0.108 |
| cg11663376 | II | 37 | 3  | 147089629 |                    | 0.54 | 0.0014  | 2.85345 | 0.29752381 | 0.405172822 | -0.108 |
| cg09122442 | II | 37 | 4  | 6894410   |                    | 0.54 | 0.0014  | 2.85345 | 0.3784146  | 0.486351922 | -0.108 |
| cg12114584 | II | 37 | 4  | 54518744  |                    | 0.5  | 0.00432 | 2.36443 | 0.76033123 | 0.652634876 | 0.108  |
| cg12307314 | II | 37 | 5  | 142206724 | ARHGAP26;ARHGAI    | 0.5  | 0.00432 | 2.36443 | 0.30531131 | 0.413667363 | -0.108 |
| cg25583651 | II | 37 | 6  | 29570040  | GABBR1;GABBR1;G    | 0.5  | 0.00432 | 2.36443 | 0.24782338 | 0.355953659 | -0.108 |
| cg22425467 | II | 37 | 6  | 30131189  | TRIM15;TRIM15      | 0.46 | 0.01197 | 1.92207 | 0.47446018 | 0.366514387 | 0.108  |
| cg23163653 | II | 37 | 6  | 30565385  |                    | 0.46 | 0.01197 | 1.92207 | 0.5119745  | 0.404214767 | 0.108  |
| cg02989255 | II | 37 | 6  | 32063774  | TNXB               | 0.42 | 0.02991 | 1.52413 | 0.55546493 | 0.663793202 | -0.108 |
| cg16634404 | II | 37 | 6  | 33161438  | COL11A2;RXRB;COL   | 0.5  | 0.00432 | 2.36443 | 0.57880641 | 0.686503679 | -0.108 |
| cg26500914 | I  | 37 | 6  | 33288323  | DAXX;DAXX;DAXX;I   | 0.58 | 0.00041 | 3.39184 | 0.81459444 | 0.92256467  | -0.108 |
| cg14302083 | II | 37 | 6  | 43608326  | MAD2L1BP;MAD2L     | 0.54 | 0.0014  | 2.85345 | 0.79465194 | 0.902195302 | -0.108 |
| cg00073460 | II | 37 | 6  | 149806502 | ZC3H12D            | 0.5  | 0.00432 | 2.36443 | 0.45232261 | 0.344479396 | 0.108  |
| cg18319852 | I  | 37 | 6  | 168436099 | KIF25;KIF25        | 0.46 | 0.01197 | 1.92207 | 0.32974681 | 0.43788735  | -0.108 |
| cg21495349 | II | 37 | 7  | 1081344   | C7orf50;C7orf50;C7 | 0.46 | 0.01197 | 1.92207 | 0.54818589 | 0.656059327 | -0.108 |
| cg00624477 | II | 37 | 7  | 1406560   |                    | 0.46 | 0.01197 | 1.92207 | 0.57985397 | 0.471626376 | 0.108  |
| cg02613295 | II | 37 | 7  | 2564256   | LFNG;LFNG;LFNG;LI  | 0.5  | 0.00432 | 2.36443 | 0.67248396 | 0.564711506 | 0.108  |
| cg05774699 | II | 37 | 7  | 27184316  | HOXA5              | 0.58 | 0.00041 | 3.39184 | 0.67394008 | 0.782140148 | -0.108 |
| cg24471254 | I  | 37 | 7  | 100253792 | ACTL6B             | 0.54 | 0.0014  | 2.85345 | 0.64963182 | 0.758070976 | -0.108 |
| cg11111139 | II | 37 | 7  | 157620685 | PTPRN2;PTPRN2;PT   | 0.46 | 0.01197 | 1.92207 | 0.48912857 | 0.596781461 | -0.108 |
| cg11313780 | II | 37 | 8  | 103817950 |                    | 0.54 | 0.0014  | 2.85345 | 0.64940795 | 0.75769621  | -0.108 |
| cg22284058 | II | 37 | 8  | 142237359 | SLC45A4            | 0.58 | 0.00041 | 3.39184 | 0.54212784 | 0.64990289  | -0.108 |
| cg04064588 | II | 37 | 8  | 144945619 | EPPK1              | 0.42 | 0.02991 | 1.52413 | 0.61845114 | 0.510640038 | 0.108  |
| cg07672814 | II | 37 | 9  | 140356830 | PNPLA7;PNPLA7      | 0.42 | 0.02991 | 1.52413 | 0.27056009 | 0.163012187 | 0.108  |
| cg17319294 | II | 37 | 10 | 71588009  | COL13A1;COL13A1;   | 0.46 | 0.01197 | 1.92207 | 0.41886399 | 0.310605779 | 0.108  |
| cg14530290 | II | 37 | 10 | 80853985  | ZMIZ1              | 0.46 | 0.01197 | 1.92207 | 0.19541441 | 0.303772207 | -0.108 |

|            |    |    |    |                            |      |          |         |            |             |        |
|------------|----|----|----|----------------------------|------|----------|---------|------------|-------------|--------|
| cg11944139 | I  | 37 | 10 | 133957543 JAKMIP3          | 0.46 | 0.01197  | 1.92207 | 0.51705159 | 0.408622483 | 0.108  |
| cg05493509 | II | 37 | 10 | 134041783 STK32C           | 0.5  | 0.00432  | 2.36443 | 0.75160137 | 0.643844016 | 0.108  |
| cg26376030 | I  | 37 | 11 | 646373 DEAF1               | 0.46 | 0.01197  | 1.92207 | 0.50480809 | 0.396786737 | 0.108  |
| cg05178291 | II | 37 | 11 | 18287689 SAA1;SAA1         | 0.54 | 0.0014   | 2.85345 | 0.21491204 | 0.322690343 | -0.108 |
| cg15060115 | II | 37 | 11 | 45672248 CHST1             | 0.58 | 0.00041  | 3.39184 | 0.69297841 | 0.801188018 | -0.108 |
| cg16004377 | II | 37 | 11 | 63272909 LGALS12;LGALS12;l | 0.46 | 0.01197  | 1.92207 | 0.28396912 | 0.391890535 | -0.108 |
| cg22933847 | II | 37 | 11 | 68780136 MRGPRF;MRGPRF     | 0.5  | 0.00432  | 2.36443 | 0.27692294 | 0.384562713 | -0.108 |
| cg03958883 | II | 37 | 11 | 73020729 ARHGFE17          | 0.58 | 0.00041  | 3.39184 | 0.44829083 | 0.556740055 | -0.108 |
| cg23189044 | II | 37 | 11 | 74178114 KCNE3             | 0.54 | 0.0014   | 2.85345 | 0.21886049 | 0.32707611  | -0.108 |
| cg09692396 | I  | 37 | 12 | 7023346 LRRC23;ENO2;LRRC   | 0.58 | 0.00041  | 3.39184 | 0.40220429 | 0.293720371 | 0.108  |
| cg13175739 | II | 37 | 12 | 10789214 STYK1             | 0.5  | 0.00432  | 2.36443 | 0.635823   | 0.744120847 | -0.108 |
| cg10923838 | II | 37 | 12 | 120242330 CIT              | 0.46 | 0.01197  | 1.92207 | 0.34454157 | 0.452389833 | -0.108 |
| cg14256511 | II | 37 | 12 | 123347684                  | 0.42 | 0.02991  | 1.52413 | 0.78339639 | 0.675057763 | 0.108  |
| cg09967479 | II | 37 | 12 | 133010684                  | 0.46 | 0.01197  | 1.92207 | 0.49491367 | 0.38711536  | 0.108  |
| cg17903776 | II | 37 | 13 | 61989726 PCDH20            | 0.54 | 0.0014   | 2.85345 | 0.16211616 | 0.269637789 | -0.108 |
| cg25320816 | II | 37 | 13 | 114099871 ADPRHL1;ADPRHL1  | 0.46 | 0.01197  | 1.92207 | 0.67900582 | 0.571404641 | 0.108  |
| cg08198540 | I  | 37 | 14 | 22963867                   | 0.5  | 0.00432  | 2.36443 | 0.85940446 | 0.751433647 | 0.108  |
| cg12142424 | II | 37 | 14 | 94759873 SERPINA10;SERPIN) | 0.54 | 0.0014   | 2.85345 | 0.5113051  | 0.402927604 | 0.108  |
| cg10018203 | II | 37 | 14 | 106179136                  | 0.58 | 0.00041  | 3.39184 | 0.5968168  | 0.48902959  | 0.108  |
| cg24640101 | II | 37 | 15 | 25482669 SNORD115-37       | 0.46 | 0.01197  | 1.92207 | 0.36158311 | 0.253261859 | 0.108  |
| cg02208504 | II | 37 | 15 | 26042919 ATP10A            | 0.42 | 0.02991  | 1.52413 | 0.6588413  | 0.550422578 | 0.108  |
| cg05678749 | I  | 37 | 15 | 27216819 GABRG3            | 0.42 | 0.02991  | 1.52413 | 0.19889006 | 0.306415471 | -0.108 |
| cg11342764 | II | 37 | 15 | 29428738 FAM189A1          | 0.67 | 2.34E-05 | 4.63072 | 0.66372502 | 0.772040379 | -0.108 |
| cg20317748 | II | 37 | 15 | 40633124 C15orf52          | 0.5  | 0.00432  | 2.36443 | 0.36579    | 0.473367237 | -0.108 |
| cg17244218 | II | 37 | 15 | 42258950 EHD4              | 0.5  | 0.00432  | 2.36443 | 0.22597888 | 0.334160273 | -0.108 |
| cg19639490 | II | 37 | 15 | 75146663 SCAMP2            | 0.42 | 0.02991  | 1.52413 | 0.78791573 | 0.67991988  | 0.108  |
| cg21840434 | II | 37 | 15 | 79297210 RASGRF1;RASGRF1;  | 0.46 | 0.01197  | 1.92207 | 0.37894254 | 0.486913592 | -0.108 |
| cg08413390 | II | 37 | 15 | 84944048                   | 0.62 | 0.0001   | 3.98291 | 0.53386011 | 0.641559572 | -0.108 |
| cg05394456 | II | 37 | 16 | 129230 MPG;MPG;MPG         | 0.42 | 0.02991  | 1.52413 | 0.17467372 | 0.282379164 | -0.108 |
| cg15337006 | II | 37 | 16 | 31271009 ITGAM;ITGAM       | 0.46 | 0.01197  | 1.92207 | 0.28625766 | 0.394420713 | -0.108 |
| cg08797704 | II | 37 | 16 | 65692605                   | 0.5  | 0.00432  | 2.36443 | 0.76505802 | 0.656745268 | 0.108  |
| cg03157862 | II | 37 | 16 | 66519174                   | 0.42 | 0.02991  | 1.52413 | 0.73501386 | 0.62746232  | 0.108  |
| cg01824618 | II | 37 | 16 | 85315212                   | 0.42 | 0.02991  | 1.52413 | 0.74201331 | 0.633798819 | 0.108  |

|            |    |    |    |                             |      |          |         |            |             |        |
|------------|----|----|----|-----------------------------|------|----------|---------|------------|-------------|--------|
| cg03386347 | II | 37 | 16 | 88261775                    | 0.46 | 0.01197  | 1.92207 | 0.72448372 | 0.61677402  | 0.108  |
| cg01046511 | II | 37 | 17 | 7742971 KDM6B               | 0.67 | 2.34E-05 | 4.63072 | 0.75217818 | 0.859970941 | -0.108 |
| cg21376526 | I  | 37 | 17 | 8659409 SPDYE4              | 0.42 | 0.02991  | 1.52413 | 0.8343737  | 0.726117441 | 0.108  |
| cg20525527 | II | 37 | 17 | 17056629 MPRIP;MPRIP        | 0.5  | 0.00432  | 2.36443 | 0.61643017 | 0.724634066 | -0.108 |
| cg26612727 | II | 37 | 17 | 38024636 ZPBP2;ZPBP2        | 0.58 | 0.00041  | 3.39184 | 0.43282458 | 0.541006787 | -0.108 |
| cg20669292 | I  | 37 | 17 | 40823420 PLEKHH3            | 0.46 | 0.01197  | 1.92207 | 0.38015251 | 0.272647285 | 0.108  |
| cg20508508 | II | 37 | 17 | 48473757 LRRC59             | 0.46 | 0.01197  | 1.92207 | 0.18907004 | 0.297232322 | -0.108 |
| cg14427590 | II | 37 | 17 | 60695089                    | 0.54 | 0.0014   | 2.85345 | 0.62996376 | 0.738397679 | -0.108 |
| cg21659714 | II | 37 | 17 | 79785991 FAM195B;FAM195I    | 0.58 | 0.00041  | 3.39184 | 0.76874658 | 0.660852076 | 0.108  |
| cg17931529 | I  | 37 | 19 | 2080023 MOBKL2A             | 0.46 | 0.01197  | 1.92207 | 0.81311163 | 0.7048271   | 0.108  |
| cg08035555 | II | 37 | 19 | 3558417 C19orf28;C19orf28   | 0.42 | 0.02991  | 1.52413 | 0.21685576 | 0.324675397 | -0.108 |
| cg04672103 | II | 37 | 19 | 16396929                    | 0.54 | 0.0014   | 2.85345 | 0.11154619 | 0.219980552 | -0.108 |
| cg14085840 | II | 37 | 19 | 40939429                    | 0.54 | 0.0014   | 2.85345 | 0.2641384  | 0.371791918 | -0.108 |
| cg16702690 | II | 37 | 19 | 51686316                    | 0.5  | 0.00432  | 2.36443 | 0.25962489 | 0.367466523 | -0.108 |
| cg06000530 | I  | 37 | 20 | 30135108 HM13;HM13;HM13     | 0.54 | 0.0014   | 2.85345 | 0.49353331 | 0.385041058 | 0.108  |
| cg17271585 | II | 37 | 20 | 36153947 BLCAP;BLCAP;BLCA   | 0.46 | 0.01197  | 1.92207 | 0.62871168 | 0.520536952 | 0.108  |
| cg27461254 | II | 37 | 20 | 39135472                    | 0.42 | 0.02991  | 1.52413 | 0.19291316 | 0.300984816 | -0.108 |
| cg24365215 | II | 37 | 20 | 61315208                    | 0.54 | 0.0014   | 2.85345 | 0.63606309 | 0.744097987 | -0.108 |
| cg23085846 | II | 37 | 20 | 62522518 TPD52L2;TPD52L2;   | 0.42 | 0.02991  | 1.52413 | 0.64233976 | 0.750089641 | -0.108 |
| cg24974982 | I  | 37 | 22 | 46403316 LOC730668          | 0.62 | 0.0001   | 3.98291 | 0.7008217  | 0.808847296 | -0.108 |
| cg25152348 | I  | 37 | 22 | 50946712 NCAPH2;LMF2;NCA    | 0.71 | 4.57E-06 | 5.34042 | 0.47304174 | 0.364714528 | 0.108  |
| cg17122213 | I  | 37 | 1  | 1564920 MIB2;MIB2;MIB2;N    | 0.5  | 0.00432  | 2.36443 | 0.38037832 | 0.273362482 | 0.107  |
| cg07708453 | II | 37 | 1  | 14032034 PRDM2;PRDM2;PRI    | 0.46 | 0.01197  | 1.92207 | 0.75801478 | 0.864744878 | -0.107 |
| cg10057098 | II | 37 | 1  | 39991426 LOC728448;BMP8A    | 0.54 | 0.0014   | 2.85345 | 0.75459714 | 0.647495533 | 0.107  |
| cg25099516 | II | 37 | 1  | 48288813                    | 0.42 | 0.02991  | 1.52413 | 0.70648339 | 0.599746261 | 0.107  |
| cg13697378 | I  | 37 | 1  | 68512845 DIRAS3             | 0.58 | 0.00041  | 3.39184 | 0.58870976 | 0.481772022 | 0.107  |
| cg11839020 | II | 37 | 1  | 90309998 LRRC8D;LRRC8D      | 0.54 | 0.0014   | 2.85345 | 0.54479824 | 0.437980889 | 0.107  |
| cg15081720 | II | 37 | 1  | 119866618                   | 0.62 | 0.0001   | 3.98291 | 0.83163539 | 0.724190632 | 0.107  |
| cg24843609 | I  | 37 | 1  | 156211434 BGLAP             | 0.46 | 0.01197  | 1.92207 | 0.34775691 | 0.455034945 | -0.107 |
| cg09584785 | II | 37 | 1  | 162333354 NOS1AP;NOS1AP;N   | 0.67 | 2.34E-05 | 4.63072 | 0.87199171 | 0.764859399 | 0.107  |
| cg06834507 | II | 37 | 1  | 200876957 C1orf106;C1orf106 | 0.42 | 0.02991  | 1.52413 | 0.30079411 | 0.407649035 | -0.107 |
| cg03422911 | II | 37 | 1  | 237205295 RYR2              | 0.58 | 0.00041  | 3.39184 | 0.23863756 | 0.345458171 | -0.107 |
| cg17214023 | II | 37 | 2  | 10176748                    | 0.5  | 0.00432  | 2.36443 | 0.46250326 | 0.569015521 | -0.107 |

|            |    |    |   |                            |      |          |         |            |             |        |
|------------|----|----|---|----------------------------|------|----------|---------|------------|-------------|--------|
| cg27375286 | II | 37 | 2 | 11518493                   | 0.42 | 0.02991  | 1.52413 | 0.7894183  | 0.682240319 | 0.107  |
| cg03377767 | II | 37 | 2 | 17997138 MSGN1             | 0.46 | 0.01197  | 1.92207 | 0.78606907 | 0.678970721 | 0.107  |
| cg10464312 | II | 37 | 2 | 66672688 MEIS1             | 0.67 | 2.34E-05 | 4.63072 | 0.25768166 | 0.36488363  | -0.107 |
| cg13522882 | II | 37 | 2 | 102316496 MAP4K4;MAP4K4;M  | 0.46 | 0.01197  | 1.92207 | 0.79680484 | 0.689961478 | 0.107  |
| cg05733104 | II | 37 | 3 | 9032419 SRGAP3;SRGAP3      | 0.46 | 0.01197  | 1.92207 | 0.79437307 | 0.687719772 | 0.107  |
| cg19551485 | II | 37 | 3 | 55693182 C3orf51;ERC2      | 0.46 | 0.01197  | 1.92207 | 0.76485986 | 0.658109172 | 0.107  |
| cg23730027 | II | 37 | 3 | 57995180 FLNB;FLNB;FLNB;FL | 0.54 | 0.0014   | 2.85345 | 0.24616144 | 0.353087966 | -0.107 |
| cg21464115 | II | 37 | 3 | 138157982 ESYT3            | 0.42 | 0.02991  | 1.52413 | 0.6142895  | 0.721312287 | -0.107 |
| cg21794419 | II | 37 | 3 | 182973032 MCF2L2;B3GNT5    | 0.58 | 0.00041  | 3.39184 | 0.71141653 | 0.818749605 | -0.107 |
| cg04398861 | II | 37 | 4 | 670694 MYL5                | 0.5  | 0.00432  | 2.36443 | 0.5061626  | 0.399322141 | 0.107  |
| cg21705324 | II | 37 | 4 | 24200012                   | 0.46 | 0.01197  | 1.92207 | 0.77358003 | 0.666185598 | 0.107  |
| cg20367304 | II | 37 | 4 | 154391944 KIAA0922;KIAA092 | 0.5  | 0.00432  | 2.36443 | 0.76336848 | 0.656159653 | 0.107  |
| cg14116129 | I  | 37 | 5 | 1140748                    | 0.58 | 0.00041  | 3.39184 | 0.43831997 | 0.331346662 | 0.107  |
| cg22490780 | I  | 37 | 5 | 16867064 MYO10             | 0.5  | 0.00432  | 2.36443 | 0.76072197 | 0.653388817 | 0.107  |
| cg22437221 | II | 37 | 5 | 39203007 FYB;FYB           | 0.46 | 0.01197  | 1.92207 | 0.67172868 | 0.778912425 | -0.107 |
| cg08477768 | II | 37 | 5 | 57925482 RAB3C             | 0.54 | 0.0014   | 2.85345 | 0.32594522 | 0.432928267 | -0.107 |
| cg01772439 | II | 37 | 5 | 149012102 FLJ41603         | 0.54 | 0.0014   | 2.85345 | 0.67341148 | 0.780187801 | -0.107 |
| cg03172212 | II | 37 | 5 | 175873937 FAF2             | 0.5  | 0.00432  | 2.36443 | 0.52234623 | 0.628931383 | -0.107 |
| cg05143092 | II | 37 | 6 | 30619209 C6orf136;C6orf136 | 0.5  | 0.00432  | 2.36443 | 0.80724482 | 0.700050725 | 0.107  |
| cg04985482 | II | 37 | 6 | 31382065 MICA              | 0.42 | 0.02991  | 1.52413 | 0.73196027 | 0.838613851 | -0.107 |
| cg00175838 | I  | 37 | 6 | 31695027 DDAH2             | 0.46 | 0.01197  | 1.92207 | 0.64325861 | 0.749990709 | -0.107 |
| cg02272968 | I  | 37 | 6 | 32015773 TNXB              | 0.42 | 0.02991  | 1.52413 | 0.59386546 | 0.48733225  | 0.107  |
| cg14023774 | II | 37 | 6 | 33246157 B3GALT4           | 0.42 | 0.02991  | 1.52413 | 0.62533019 | 0.518666363 | 0.107  |
| cg10479493 | II | 37 | 6 | 33772694 MLN;MLN           | 0.42 | 0.02991  | 1.52413 | 0.71329326 | 0.606632408 | 0.107  |
| cg21130236 | I  | 37 | 6 | 44246755 TMEM151B          | 0.54 | 0.0014   | 2.85345 | 0.75854422 | 0.651782271 | 0.107  |
| cg12545949 | II | 37 | 6 | 71571446 SMAP1;SMAP1;B3C   | 0.46 | 0.01197  | 1.92207 | 0.70554487 | 0.812812567 | -0.107 |
| cg02159996 | II | 37 | 6 | 89927233 GABRR1;GABRR1     | 0.58 | 0.00041  | 3.39184 | 0.44601433 | 0.553475953 | -0.107 |
| cg06270737 | II | 37 | 6 | 138785358 NHSL1;NHSL1      | 0.46 | 0.01197  | 1.92207 | 0.51573862 | 0.622866786 | -0.107 |
| cg17310882 | I  | 37 | 6 | 158066609 ZDHHC14;ZDHHC14  | 0.5  | 0.00432  | 2.36443 | 0.48633975 | 0.592851604 | -0.107 |
| cg13828236 | II | 37 | 7 | 80970                      | 0.5  | 0.00432  | 2.36443 | 0.66363622 | 0.770272517 | -0.107 |
| cg24505167 | II | 37 | 7 | 1915268 MAD1L1;MAD1L1;M    | 0.5  | 0.00432  | 2.36443 | 0.23261035 | 0.339259098 | -0.107 |
| cg11724970 | I  | 37 | 7 | 27182493 HOXA5             | 0.5  | 0.00432  | 2.36443 | 0.68640207 | 0.79306226  | -0.107 |
| cg00552235 | I  | 37 | 7 | 100943163                  | 0.46 | 0.01197  | 1.92207 | 0.11578135 | 0.222376019 | -0.107 |

|            |    |    |    |                            |      |          |         |            |             |        |
|------------|----|----|----|----------------------------|------|----------|---------|------------|-------------|--------|
| cg14839837 | II | 37 | 8  | 1834174 ARHGEF10           | 0.5  | 0.00432  | 2.36443 | 0.78226606 | 0.675609405 | 0.107  |
| cg01588250 | II | 37 | 8  | 54427263                   | 0.42 | 0.02991  | 1.52413 | 0.74976887 | 0.642443072 | 0.107  |
| cg20162696 | II | 37 | 8  | 102167694                  | 0.5  | 0.00432  | 2.36443 | 0.27501681 | 0.382280119 | -0.107 |
| cg22283754 | II | 37 | 8  | 128999428 PVT1             | 0.5  | 0.00432  | 2.36443 | 0.85650653 | 0.749276315 | 0.107  |
| cg25398315 | II | 37 | 8  | 135938022                  | 0.46 | 0.01197  | 1.92207 | 0.52398057 | 0.416613291 | 0.107  |
| cg24002158 | II | 37 | 8  | 142369468 GPR20            | 0.5  | 0.00432  | 2.36443 | 0.43494665 | 0.541562256 | -0.107 |
| cg13448704 | II | 37 | 8  | 143596845 BAI1             | 0.54 | 0.0014   | 2.85345 | 0.55221665 | 0.65910671  | -0.107 |
| cg13845692 | II | 37 | 9  | 94259238                   | 0.46 | 0.01197  | 1.92207 | 0.80190456 | 0.694826576 | 0.107  |
| cg14400354 | I  | 37 | 9  | 101570703 GALNT12          | 0.46 | 0.01197  | 1.92207 | 0.14628296 | 0.252987007 | -0.107 |
| cg02539754 | II | 37 | 9  | 139012954                  | 0.67 | 2.34E-05 | 4.63072 | 0.71223529 | 0.818848079 | -0.107 |
| cg15449516 | II | 37 | 10 | 48593014                   | 0.5  | 0.00432  | 2.36443 | 0.82614812 | 0.719038845 | 0.107  |
| cg00234046 | II | 37 | 10 | 73169245 CDH23;CDH23       | 0.54 | 0.0014   | 2.85345 | 0.75970131 | 0.866999711 | -0.107 |
| cg14341467 | II | 37 | 10 | 121201554 GRK5             | 0.46 | 0.01197  | 1.92207 | 0.59914137 | 0.492207244 | 0.107  |
| cg07055616 | I  | 37 | 10 | 134600600 NKX6-2           | 0.42 | 0.02991  | 1.52413 | 0.08490641 | 0.191554173 | -0.107 |
| cg15352671 | I  | 37 | 11 | 1331497 LOC255512;TOLLIP   | 0.42 | 0.02991  | 1.52413 | 0.37651167 | 0.269432846 | 0.107  |
| cg22040301 | II | 37 | 11 | 2919798 SLC22A18AS;SLC22.  | 0.5  | 0.00432  | 2.36443 | 0.47852026 | 0.585573477 | -0.107 |
| cg11623855 | II | 37 | 11 | 33563720 C11orf41          | 0.42 | 0.02991  | 1.52413 | 0.66381445 | 0.556410267 | 0.107  |
| cg04171808 | II | 37 | 11 | 35188437 CD44;CD44;CD44;C  | 0.5  | 0.00432  | 2.36443 | 0.84879083 | 0.741479351 | 0.107  |
| cg02937674 | I  | 37 | 11 | 49579997 LOC440040         | 0.46 | 0.01197  | 1.92207 | 0.15856736 | 0.265574327 | -0.107 |
| cg11658781 | II | 37 | 11 | 73241335 FAM168A           | 0.5  | 0.00432  | 2.36443 | 0.78934716 | 0.895847277 | -0.107 |
| cg14190451 | II | 37 | 11 | 118083942 AMICA1;AMICA1;A  | 0.54 | 0.0014   | 2.85345 | 0.78388015 | 0.891343918 | -0.107 |
| cg16592378 | II | 37 | 11 | 126498687 KIRREL3;KIRREL3  | 0.5  | 0.00432  | 2.36443 | 0.62696558 | 0.520132892 | 0.107  |
| cg19796532 | I  | 37 | 12 | 50426901                   | 0.54 | 0.0014   | 2.85345 | 0.07870352 | 0.185344606 | -0.107 |
| cg06303168 | II | 37 | 12 | 56322959 WIBG              | 0.42 | 0.02991  | 1.52413 | 0.56001788 | 0.452541407 | 0.107  |
| cg24448421 | II | 37 | 12 | 68737061                   | 0.62 | 0.0001   | 3.98291 | 0.26472251 | 0.157250911 | 0.107  |
| cg12596182 | II | 37 | 12 | 70082885 BEST3;BEST3;BEST3 | 0.62 | 0.0001   | 3.98291 | 0.60142687 | 0.708762774 | -0.107 |
| cg08337166 | II | 37 | 12 | 108686134 CMKLR1;CMKLR1;C  | 0.5  | 0.00432  | 2.36443 | 0.54896124 | 0.442120369 | 0.107  |
| cg08318726 | I  | 37 | 12 | 114844265 TBX5;TBX5;TBX5   | 0.46 | 0.01197  | 1.92207 | 0.10493099 | 0.212093405 | -0.107 |
| cg06072822 | I  | 37 | 13 | 113652069 MCF2L;MCF2L      | 0.62 | 0.0001   | 3.98291 | 0.61786781 | 0.725029316 | -0.107 |
| cg10418289 | II | 37 | 14 | 23308294 MMP14             | 0.54 | 0.0014   | 2.85345 | 0.56929732 | 0.67675155  | -0.107 |
| cg04728863 | II | 37 | 14 | 58863362 TOMM20L           | 0.5  | 0.00432  | 2.36443 | 0.690821   | 0.797340769 | -0.107 |
| cg16577789 | II | 37 | 14 | 94186558 PRIMA1            | 0.5  | 0.00432  | 2.36443 | 0.64143634 | 0.534258973 | 0.107  |
| cg00946921 | I  | 37 | 14 | 106025021                  | 0.5  | 0.00432  | 2.36443 | 0.75874409 | 0.651402069 | 0.107  |

|            |    |    |    |           |                   |      |          |         |            |             |        |
|------------|----|----|----|-----------|-------------------|------|----------|---------|------------|-------------|--------|
| cg21594043 | II | 37 | 15 | 92491578  | SLCO3A1;SLCO3A1   | 0.42 | 0.02991  | 1.52413 | 0.26467739 | 0.371615432 | -0.107 |
| cg00925492 | II | 37 | 16 | 29165632  |                   | 0.46 | 0.01197  | 1.92207 | 0.41152953 | 0.518334384 | -0.107 |
| cg27659768 | II | 37 | 16 | 71523436  | ZNF19             | 0.46 | 0.01197  | 1.92207 | 0.72487203 | 0.832152192 | -0.107 |
| cg09363128 | II | 37 | 16 | 85478932  |                   | 0.58 | 0.00041  | 3.39184 | 0.51282605 | 0.406275534 | 0.107  |
| cg26935333 | I  | 37 | 16 | 90148962  |                   | 0.46 | 0.01197  | 1.92207 | 0.44535556 | 0.338570849 | 0.107  |
| cg04196298 | I  | 37 | 17 | 1480710   | SLC43A2           | 0.5  | 0.00432  | 2.36443 | 0.125156   | 0.231719798 | -0.107 |
| cg23530553 | II | 37 | 17 | 46622536  | HOXB2             | 0.5  | 0.00432  | 2.36443 | 0.52518022 | 0.631741434 | -0.107 |
| cg05230392 | II | 37 | 17 | 55976522  | CUEDC1            | 0.5  | 0.00432  | 2.36443 | 0.64782713 | 0.754938975 | -0.107 |
| cg16463557 | II | 37 | 17 | 79296334  | TMEM105           | 0.54 | 0.0014   | 2.85345 | 0.64868599 | 0.541542199 | 0.107  |
| cg16776981 | I  | 37 | 17 | 79428142  | BAHCC1            | 0.42 | 0.02991  | 1.52413 | 0.51672511 | 0.62335511  | -0.107 |
| cg15085044 | II | 37 | 17 | 80668757  |                   | 0.42 | 0.02991  | 1.52413 | 0.70405629 | 0.597325343 | 0.107  |
| cg06931418 | II | 37 | 19 | 1402419   | GAMT;GAMT         | 0.58 | 0.00041  | 3.39184 | 0.17097379 | 0.278296397 | -0.107 |
| cg05376219 | II | 37 | 19 | 2346279   | SPPL2B;SPPL2B     | 0.62 | 0.0001   | 3.98291 | 0.64134025 | 0.748721839 | -0.107 |
| cg18229071 | II | 37 | 19 | 2695245   | GNG7              | 0.46 | 0.01197  | 1.92207 | 0.23089053 | 0.337603816 | -0.107 |
| cg20091384 | I  | 37 | 19 | 2700927   | GNG7              | 0.5  | 0.00432  | 2.36443 | 0.79772322 | 0.69065263  | 0.107  |
| cg14950321 | II | 37 | 19 | 4530233   | PLIN5             | 0.5  | 0.00432  | 2.36443 | 0.50232775 | 0.394997606 | 0.107  |
| cg27052073 | II | 37 | 19 | 45654213  | NKPD1             | 0.58 | 0.00041  | 3.39184 | 0.6411351  | 0.747970814 | -0.107 |
| cg15114651 | II | 37 | 19 | 47289410  | SLC1A5;SLC1A5;SLC | 0.42 | 0.02991  | 1.52413 | 0.54848411 | 0.441672638 | 0.107  |
| cg11311352 | II | 37 | 19 | 56058710  |                   | 0.62 | 0.0001   | 3.98291 | 0.22298993 | 0.330434257 | -0.107 |
| cg04432319 | I  | 37 | 20 | 13200931  | ISM1              | 0.54 | 0.0014   | 2.85345 | 0.03259036 | 0.139722145 | -0.107 |
| cg27529037 | II | 37 | 20 | 44575021  | PCIF1             | 0.62 | 0.0001   | 3.98291 | 0.63365177 | 0.740229457 | -0.107 |
| cg06653796 | II | 37 | 20 | 62367805  | LIME1             | 0.5  | 0.00432  | 2.36443 | 0.19628408 | 0.089325592 | 0.107  |
| cg07806328 | II | 37 | 21 | 45774664  | TRPM2             | 0.5  | 0.00432  | 2.36443 | 0.69946982 | 0.806436295 | -0.107 |
| cg07443748 | II | 37 | 22 | 17073594  | CCT8L2;CCT8L2     | 0.46 | 0.01197  | 1.92207 | 0.80714325 | 0.70028172  | 0.107  |
| cg06458106 | II | 37 | 22 | 17591807  |                   | 0.71 | 4.57E-06 | 5.34042 | 0.70612711 | 0.813334015 | -0.107 |
| cg11522804 | I  | 37 | 22 | 19438246  | UFD1L;UFD1L       | 0.54 | 0.0014   | 2.85345 | 0.74848057 | 0.855338486 | -0.107 |
| cg07313319 | II | 37 | 22 | 38714426  | CSNK1E;CSNK1E     | 0.46 | 0.01197  | 1.92207 | 0.39864011 | 0.505504484 | -0.107 |
| cg10219223 | II | 37 | 1  | 6420713   | ACOT7;ACOT7;ACO   | 0.54 | 0.0014   | 2.85345 | 0.58284012 | 0.688681016 | -0.106 |
| cg04578903 | II | 37 | 1  | 21754899  |                   | 0.5  | 0.00432  | 2.36443 | 0.22366581 | 0.329837163 | -0.106 |
| cg22526531 | II | 37 | 1  | 35913782  | KIAA0319L         | 0.46 | 0.01197  | 1.92207 | 0.7481485  | 0.853708329 | -0.106 |
| cg11674933 | II | 37 | 1  | 36948313  | CSF3R;CSF3R;CSF3F | 0.42 | 0.02991  | 1.52413 | 0.18769667 | 0.294067853 | -0.106 |
| cg02451774 | II | 37 | 1  | 147801218 |                   | 0.5  | 0.00432  | 2.36443 | 0.31282936 | 0.419291323 | -0.106 |
| cg05848175 | II | 37 | 1  | 153330257 | S100A9            | 0.5  | 0.00432  | 2.36443 | 0.15388583 | 0.259918828 | -0.106 |

|            |    |    |   |                               |      |          |         |            |             |        |
|------------|----|----|---|-------------------------------|------|----------|---------|------------|-------------|--------|
| cg16986748 | II | 37 | 1 | 154971109                     | 0.71 | 4.57E-06 | 5.34042 | 0.27907311 | 0.385175151 | -0.106 |
| cg00714874 | II | 37 | 1 | 161679461 FCRLA               | 0.46 | 0.01197  | 1.92207 | 0.48720682 | 0.380747009 | 0.106  |
| cg15166311 | II | 37 | 1 | 178007283                     | 0.58 | 0.00041  | 3.39184 | 0.12306097 | 0.228776554 | -0.106 |
| cg15677434 | II | 37 | 1 | 206226009 AVPR1B              | 0.54 | 0.0014   | 2.85345 | 0.65971422 | 0.765499216 | -0.106 |
| cg20316614 | II | 37 | 1 | 226065637 TMEM63A             | 0.54 | 0.0014   | 2.85345 | 0.25903718 | 0.36553696  | -0.106 |
| cg20594765 | II | 37 | 1 | 230276238 GALNT2              | 0.62 | 0.0001   | 3.98291 | 0.71878677 | 0.82482486  | -0.106 |
| cg08458637 | II | 37 | 1 | 231747906 TSNAX-DISC1;TSNA    | 0.42 | 0.02991  | 1.52413 | 0.68412364 | 0.78975897  | -0.106 |
| cg04011474 | II | 37 | 2 | 28904455                      | 0.46 | 0.01197  | 1.92207 | 0.76971071 | 0.663945106 | 0.106  |
| cg02582355 | II | 37 | 2 | 38001560                      | 0.46 | 0.01197  | 1.92207 | 0.70899718 | 0.603427155 | 0.106  |
| cg04674832 | II | 37 | 2 | 72078638                      | 0.58 | 0.00041  | 3.39184 | 0.61913005 | 0.725444095 | -0.106 |
| cg08493581 | II | 37 | 2 | 85472279 TCF7L1               | 0.46 | 0.01197  | 1.92207 | 0.74666129 | 0.640257272 | 0.106  |
| cg24715680 | II | 37 | 2 | 215675429 BARD1               | 0.46 | 0.01197  | 1.92207 | 0.39788855 | 0.504272332 | -0.106 |
| cg17316300 | II | 37 | 2 | 237381593 IQCA1               | 0.5  | 0.00432  | 2.36443 | 0.71463354 | 0.608774554 | 0.106  |
| cg16887422 | II | 37 | 2 | 240035107 HDAC4               | 0.54 | 0.0014   | 2.85345 | 0.52489302 | 0.630560893 | -0.106 |
| cg27125504 | II | 37 | 3 | 52865637 ITIH4;ITIH4          | 0.5  | 0.00432  | 2.36443 | 0.7011928  | 0.807082669 | -0.106 |
| cg05116378 | II | 37 | 3 | 141377105                     | 0.5  | 0.00432  | 2.36443 | 0.46488021 | 0.571314463 | -0.106 |
| cg23980776 | I  | 37 | 4 | 657074 PDE6B;PDE6B;PDE6B      | 0.42 | 0.02991  | 1.52413 | 0.61759585 | 0.723263195 | -0.106 |
| cg06943431 | II | 37 | 4 | 3475041 DOK7;DOK7             | 0.42 | 0.02991  | 1.52413 | 0.73389123 | 0.627659465 | 0.106  |
| cg04710179 | II | 37 | 4 | 37891376 TBC1D1               | 0.46 | 0.01197  | 1.92207 | 0.68720177 | 0.793246377 | -0.106 |
| cg02661034 | II | 37 | 5 | 1477269 LPCAT1                | 0.5  | 0.00432  | 2.36443 | 0.65526051 | 0.761711113 | -0.106 |
| cg23987134 | II | 37 | 5 | 17158319 LOC285696            | 0.62 | 0.0001   | 3.98291 | 0.51793916 | 0.624026005 | -0.106 |
| cg26078977 | I  | 37 | 5 | 59189467 PDE4D;PDE4D;PDE4D    | 0.54 | 0.0014   | 2.85345 | 0.12019983 | 0.226163365 | -0.106 |
| cg12643293 | I  | 37 | 5 | 176101883                     | 0.62 | 0.0001   | 3.98291 | 0.57379977 | 0.468209349 | 0.106  |
| cg24843380 | I  | 37 | 5 | 178367827 ZNF454              | 0.42 | 0.02991  | 1.52413 | 0.09214325 | 0.198455179 | -0.106 |
| cg18505691 | II | 37 | 6 | 29723320                      | 0.5  | 0.00432  | 2.36443 | 0.73830918 | 0.844456993 | -0.106 |
| cg13079571 | II | 37 | 6 | 30297257 TRIM39;TRIM39        | 0.5  | 0.00432  | 2.36443 | 0.79825198 | 0.904050369 | -0.106 |
| cg04425551 | II | 37 | 6 | 30297338 TRIM39;TRIM39        | 0.42 | 0.02991  | 1.52413 | 0.77411009 | 0.88026225  | -0.106 |
| cg06321045 | I  | 37 | 6 | 31088343 CDSN;PSORS1C1        | 0.46 | 0.01197  | 1.92207 | 0.45421016 | 0.559855388 | -0.106 |
| cg27490128 | II | 37 | 6 | 31560441 NCR3;NCR3;NCR3       | 0.42 | 0.02991  | 1.52413 | 0.79023987 | 0.684481434 | 0.106  |
| cg08355863 | II | 37 | 6 | 33587496                      | 0.5  | 0.00432  | 2.36443 | 0.67787569 | 0.783884923 | -0.106 |
| cg23372795 | II | 37 | 6 | 39284679 KCNK16;KCNK16;KCNK16 | 0.46 | 0.01197  | 1.92207 | 0.67828815 | 0.571936788 | 0.106  |
| cg00191957 | II | 37 | 6 | 43476766 C6orf154             | 0.54 | 0.0014   | 2.85345 | 0.38325043 | 0.489250007 | -0.106 |
| cg24863152 | II | 37 | 6 | 151134876 PLEKHG1             | 0.5  | 0.00432  | 2.36443 | 0.53907893 | 0.432593606 | 0.106  |

|            |    |    |    |                             |      |          |         |            |             |        |
|------------|----|----|----|-----------------------------|------|----------|---------|------------|-------------|--------|
| cg18747197 | II | 37 | 6  | 158110124                   | 0.54 | 0.0014   | 2.85345 | 0.62392913 | 0.729634096 | -0.106 |
| cg07007035 | II | 37 | 7  | 1776076 ELFN1               | 0.46 | 0.01197  | 1.92207 | 0.70563103 | 0.599661015 | 0.106  |
| cg13998945 | II | 37 | 7  | 45035665                    | 0.54 | 0.0014   | 2.85345 | 0.71441442 | 0.608861153 | 0.106  |
| cg08798349 | II | 37 | 7  | 102613822 FBXL13;FBXL13     | 0.42 | 0.02991  | 1.52413 | 0.60762719 | 0.714034664 | -0.106 |
| cg09322278 | II | 37 | 7  | 134233791                   | 0.5  | 0.00432  | 2.36443 | 0.73461964 | 0.629002048 | 0.106  |
| cg19418190 | II | 37 | 7  | 158221076 PTPRN2;PTPRN2;PT  | 0.46 | 0.01197  | 1.92207 | 0.78230676 | 0.675984156 | 0.106  |
| cg06892907 | II | 37 | 8  | 103818062                   | 0.67 | 2.34E-05 | 4.63072 | 0.37317189 | 0.478930065 | -0.106 |
| cg21934273 | I  | 37 | 8  | 143620593 BAI1              | 0.58 | 0.00041  | 3.39184 | 0.78994481 | 0.684079194 | 0.106  |
| cg23629150 | II | 37 | 8  | 144416404 TOP1MT            | 0.46 | 0.01197  | 1.92207 | 0.6947167  | 0.800695454 | -0.106 |
| cg14032964 | II | 37 | 9  | 92159306                    | 0.42 | 0.02991  | 1.52413 | 0.77001618 | 0.875759021 | -0.106 |
| cg13630095 | II | 37 | 9  | 125137594 PTGS1;PTGS1       | 0.71 | 4.57E-06 | 5.34042 | 0.35892906 | 0.464691472 | -0.106 |
| cg13914004 | II | 37 | 9  | 130659670 ST6GALNAC6        | 0.42 | 0.02991  | 1.52413 | 0.22697891 | 0.333395578 | -0.106 |
| cg13549174 | II | 37 | 9  | 133910264 LAMC3             | 0.54 | 0.0014   | 2.85345 | 0.77363597 | 0.668113046 | 0.106  |
| cg20017995 | II | 37 | 9  | 136216076 SNORD24;SNORD30   | 0.5  | 0.00432  | 2.36443 | 0.6553641  | 0.549376147 | 0.106  |
| cg25200616 | II | 37 | 9  | 138800390 CAMSAP1           | 0.5  | 0.00432  | 2.36443 | 0.59469456 | 0.488712716 | 0.106  |
| cg11873854 | II | 37 | 9  | 139642875 LCN6              | 0.5  | 0.00432  | 2.36443 | 0.55759543 | 0.451761163 | 0.106  |
| cg10880928 | II | 37 | 9  | 139715701 C9orf86;C9orf86   | 0.46 | 0.01197  | 1.92207 | 0.28962985 | 0.395671769 | -0.106 |
| cg14334460 | II | 37 | 9  | 140346899 NELF;NELF;NELF;NE | 0.54 | 0.0014   | 2.85345 | 0.72823531 | 0.834133929 | -0.106 |
| cg07121693 | II | 37 | 10 | 44148437                    | 0.46 | 0.01197  | 1.92207 | 0.57265767 | 0.466592079 | 0.106  |
| cg12161982 | II | 37 | 10 | 49802919 ARHGAP22           | 0.5  | 0.00432  | 2.36443 | 0.85095443 | 0.745303582 | 0.106  |
| cg23786747 | II | 37 | 10 | 64320150 ZNF365;ZNF365      | 0.5  | 0.00432  | 2.36443 | 0.75421562 | 0.859724179 | -0.106 |
| cg18719787 | II | 37 | 10 | 79929586                    | 0.5  | 0.00432  | 2.36443 | 0.69398162 | 0.587522752 | 0.106  |
| cg16536739 | II | 37 | 10 | 99532636 SFRP5              | 0.54 | 0.0014   | 2.85345 | 0.70835474 | 0.602833737 | 0.106  |
| cg15903032 | II | 37 | 10 | 101297605                   | 0.67 | 2.34E-05 | 4.63072 | 0.41096121 | 0.517229788 | -0.106 |
| cg11229101 | II | 37 | 10 | 134230885 PWWP2B;PWWP2E     | 0.5  | 0.00432  | 2.36443 | 0.62434592 | 0.730622671 | -0.106 |
| cg07420362 | II | 37 | 11 | 3647419 TRPC2               | 0.46 | 0.01197  | 1.92207 | 0.22289246 | 0.329312718 | -0.106 |
| cg11096993 | II | 37 | 11 | 67417958 ACY3               | 0.46 | 0.01197  | 1.92207 | 0.5478474  | 0.441458816 | 0.106  |
| cg03161498 | II | 37 | 11 | 75265195                    | 0.46 | 0.01197  | 1.92207 | 0.77850925 | 0.67242125  | 0.106  |
| cg16100721 | II | 37 | 11 | 102300650 TMEM123           | 0.58 | 0.00041  | 3.39184 | 0.54545441 | 0.439293075 | 0.106  |
| cg18268562 | II | 37 | 11 | 118842392 FOXR1             | 0.46 | 0.01197  | 1.92207 | 0.47842027 | 0.584471787 | -0.106 |
| cg10462961 | II | 37 | 11 | 130493253                   | 0.58 | 0.00041  | 3.39184 | 0.60704093 | 0.500928991 | 0.106  |
| cg08317801 | I  | 37 | 12 | 8286738 CLEC4A;CLEC4A;CLI   | 0.58 | 0.00041  | 3.39184 | 0.88461765 | 0.778164556 | 0.106  |
| cg21422475 | II | 37 | 12 | 51890999 SLC4A8;SLC4A8      | 0.5  | 0.00432  | 2.36443 | 0.78973576 | 0.89622815  | -0.106 |

|            |    |    |    |                            |      |          |         |            |             |        |
|------------|----|----|----|----------------------------|------|----------|---------|------------|-------------|--------|
| cg18845433 | II | 37 | 12 | 53193325                   | 0.5  | 0.00432  | 2.36443 | 0.68456104 | 0.578308969 | 0.106  |
| cg10157862 | II | 37 | 12 | 69725695                   | 0.58 | 0.00041  | 3.39184 | 0.46111349 | 0.566666987 | -0.106 |
| cg01616876 | II | 37 | 12 | 113544928 RASAL1           | 0.5  | 0.00432  | 2.36443 | 0.16995121 | 0.275517142 | -0.106 |
| cg10839475 | II | 37 | 12 | 113959012                  | 0.5  | 0.00432  | 2.36443 | 0.78866986 | 0.682720654 | 0.106  |
| cg19945931 | I  | 37 | 12 | 133022760                  | 0.42 | 0.02991  | 1.52413 | 0.6501391  | 0.755977588 | -0.106 |
| cg04947907 | II | 37 | 12 | 133345285                  | 0.5  | 0.00432  | 2.36443 | 0.30083179 | 0.407226261 | -0.106 |
| cg14688299 | I  | 37 | 13 | 30728099                   | 0.5  | 0.00432  | 2.36443 | 0.65390936 | 0.54745834  | 0.106  |
| cg03865667 | II | 37 | 13 | 58205678 PCDH17            | 0.62 | 0.0001   | 3.98291 | 0.1711203  | 0.276832022 | -0.106 |
| cg25006823 | II | 37 | 14 | 67982456 TMEM229B          | 0.5  | 0.00432  | 2.36443 | 0.4457372  | 0.339280985 | 0.106  |
| cg08079330 | II | 37 | 14 | 76847792 ESRRB             | 0.54 | 0.0014   | 2.85345 | 0.49972995 | 0.394198804 | 0.106  |
| cg18633154 | II | 37 | 14 | 77296234 C14orf166B        | 0.46 | 0.01197  | 1.92207 | 0.76821291 | 0.662386269 | 0.106  |
| cg09285543 | II | 37 | 14 | 101296134 MEG3;MEG3;MEG3   | 0.46 | 0.01197  | 1.92207 | 0.80528592 | 0.699273976 | 0.106  |
| cg22799691 | II | 37 | 14 | 103821330                  | 0.62 | 0.0001   | 3.98291 | 0.75605138 | 0.64962471  | 0.106  |
| cg14172849 | II | 37 | 14 | 104171259 XRCC3;XRCC3;XRCC | 0.5  | 0.00432  | 2.36443 | 0.49870935 | 0.604540864 | -0.106 |
| cg24632582 | I  | 37 | 15 | 41233701                   | 0.62 | 0.0001   | 3.98291 | 0.50233937 | 0.608661403 | -0.106 |
| cg05737682 | I  | 37 | 16 | 3021802 PAQR4              | 0.62 | 0.0001   | 3.98291 | 0.76982441 | 0.663846718 | 0.106  |
| cg13574337 | II | 37 | 16 | 4016720 ADCY9              | 0.54 | 0.0014   | 2.85345 | 0.70064977 | 0.594362344 | 0.106  |
| cg06323332 | II | 37 | 16 | 4714229 MGRN1;MGRN1;MGRN1  | 0.54 | 0.0014   | 2.85345 | 0.19571049 | 0.30200545  | -0.106 |
| cg10505257 | I  | 37 | 16 | 4731639 MGRN1;MGRN1;MGRN1  | 0.5  | 0.00432  | 2.36443 | 0.7996393  | 0.905233593 | -0.106 |
| cg00504410 | II | 37 | 16 | 4732262 MGRN1;MGRN1;MGRN1  | 0.5  | 0.00432  | 2.36443 | 0.65612017 | 0.761730248 | -0.106 |
| cg00417823 | II | 37 | 16 | 56330268 GNAO1;GNAO1       | 0.46 | 0.01197  | 1.92207 | 0.64972085 | 0.543663468 | 0.106  |
| cg04252938 | II | 37 | 16 | 88101013 BANP;BANP         | 0.42 | 0.02991  | 1.52413 | 0.65704022 | 0.55074359  | 0.106  |
| cg04694209 | II | 37 | 16 | 89228970 C16orf81          | 0.46 | 0.01197  | 1.92207 | 0.76164057 | 0.655881181 | 0.106  |
| cg18900669 | II | 37 | 17 | 7482456 CD68;CD68          | 0.42 | 0.02991  | 1.52413 | 0.2459643  | 0.352244197 | -0.106 |
| cg08197105 | II | 37 | 17 | 27284655 SEZ6;SEZ6         | 0.54 | 0.0014   | 2.85345 | 0.74018971 | 0.846207802 | -0.106 |
| cg26500312 | II | 37 | 17 | 30821755 MYO1D             | 0.54 | 0.0014   | 2.85345 | 0.72971867 | 0.835773122 | -0.106 |
| cg25451120 | II | 37 | 17 | 47287444 ABI3;GNGT2;ABI3   | 0.58 | 0.00041  | 3.39184 | 0.5765337  | 0.470659297 | 0.106  |
| cg05310240 | II | 37 | 17 | 47979069                   | 0.54 | 0.0014   | 2.85345 | 0.58571674 | 0.479794706 | 0.106  |
| cg19716073 | II | 37 | 17 | 65039817 CACNG1            | 0.46 | 0.01197  | 1.92207 | 0.82837686 | 0.72239595  | 0.106  |
| cg08352115 | II | 37 | 17 | 66356057 ARSG              | 0.71 | 4.57E-06 | 5.34042 | 0.69956869 | 0.805411627 | -0.106 |
| cg23120541 | II | 37 | 17 | 75422456 SEPT9;SEPT9;SEPT9 | 0.54 | 0.0014   | 2.85345 | 0.42133786 | 0.527446011 | -0.106 |
| cg24867468 | I  | 37 | 17 | 76109222 TMC6;TMC6         | 0.5  | 0.00432  | 2.36443 | 0.83179402 | 0.725613009 | 0.106  |
| cg00945209 | I  | 37 | 17 | 76801579 USP36             | 0.46 | 0.01197  | 1.92207 | 0.71505278 | 0.609402186 | 0.106  |

|            |    |    |    |           |                    |      |         |         |            |             |        |
|------------|----|----|----|-----------|--------------------|------|---------|---------|------------|-------------|--------|
| cg25792439 | I  | 37 | 17 | 78163268  | CARD14;CARD14      | 0.5  | 0.00432 | 2.36443 | 0.73279881 | 0.838452298 | -0.106 |
| cg07737135 | II | 37 | 19 | 1356032   | MUM1;MUM1          | 0.54 | 0.0014  | 2.85345 | 0.64243892 | 0.748316953 | -0.106 |
| cg19477361 | II | 37 | 19 | 2607903   | GNG7               | 0.58 | 0.00041 | 3.39184 | 0.61134525 | 0.504913373 | 0.106  |
| cg13078421 | II | 37 | 19 | 2624622   | GNG7               | 0.54 | 0.0014  | 2.85345 | 0.27837731 | 0.172845949 | 0.106  |
| cg21207418 | II | 37 | 19 | 11688711  | ACP5;ACP5;ACP5;A   | 0.42 | 0.02991 | 1.52413 | 0.75491904 | 0.648957194 | 0.106  |
| cg17320378 | II | 37 | 19 | 17664088  | FAM129C            | 0.46 | 0.01197 | 1.92207 | 0.57954293 | 0.685264654 | -0.106 |
| cg09466818 | II | 37 | 19 | 18965708  | UPF1               | 0.5  | 0.00432 | 2.36443 | 0.55029262 | 0.656170022 | -0.106 |
| cg21107581 | II | 37 | 19 | 49258805  | FGF21;FUT1         | 0.42 | 0.02991 | 1.52413 | 0.76493706 | 0.65862744  | 0.106  |
| cg17204562 | II | 37 | 20 | 48568916  | RNF114             | 0.46 | 0.01197 | 1.92207 | 0.73447681 | 0.840107778 | -0.106 |
| cg04343971 | I  | 37 | 20 | 62570696  |                    | 0.46 | 0.01197 | 1.92207 | 0.7008524  | 0.806366538 | -0.106 |
| cg13033054 | II | 37 | 21 | 33948561  | TCP10L             | 0.42 | 0.02991 | 1.52413 | 0.60361084 | 0.709930114 | -0.106 |
| cg00520380 | II | 37 | 22 | 31643997  | LIMK2;LIMK2;LIMK2  | 0.54 | 0.0014  | 2.85345 | 0.55766181 | 0.663543601 | -0.106 |
| cg01360115 | II | 37 | 22 | 50747878  |                    | 0.62 | 0.0001  | 3.98291 | 0.48606494 | 0.591840609 | -0.106 |
| cg12718519 | I  | 37 | 1  | 2058417   | PRKCZ;PRKCZ;PRKC   | 0.46 | 0.01197 | 1.92207 | 0.15790961 | 0.052612421 | 0.105  |
| cg21108519 | II | 37 | 1  | 3425603   | MEGF6              | 0.42 | 0.02991 | 1.52413 | 0.70744049 | 0.602595689 | 0.105  |
| cg04934305 | II | 37 | 1  | 17421315  | PADI2              | 0.46 | 0.01197 | 1.92207 | 0.70873647 | 0.604090723 | 0.105  |
| cg18931815 | II | 37 | 1  | 36565772  | COL8A2             | 0.5  | 0.00432 | 2.36443 | 0.50026935 | 0.604862393 | -0.105 |
| cg18172358 | II | 37 | 1  | 76734569  | ST6GALNAC3;ST6G    | 0.46 | 0.01197 | 1.92207 | 0.78592885 | 0.680987737 | 0.105  |
| cg12139069 | II | 37 | 1  | 145004468 | PDE4DIP            | 0.62 | 0.0001  | 3.98291 | 0.46687582 | 0.361431065 | 0.105  |
| cg04922029 | II | 37 | 1  | 159174728 | DARC;DARC;DARC     | 0.58 | 0.00041 | 3.39184 | 0.53284796 | 0.638313175 | -0.105 |
| cg00071250 | II | 37 | 1  | 172628263 | FASLG;FASLG        | 0.5  | 0.00432 | 2.36443 | 0.79234743 | 0.687717349 | 0.105  |
| cg00091302 | II | 37 | 1  | 182602986 |                    | 0.42 | 0.02991 | 1.52413 | 0.39572154 | 0.290866862 | 0.105  |
| cg09186051 | II | 37 | 1  | 231981906 | DISC1;DISC1;DISC1; | 0.5  | 0.00432 | 2.36443 | 0.70884471 | 0.603469848 | 0.105  |
| cg16576033 | II | 37 | 1  | 235268621 |                    | 0.42 | 0.02991 | 1.52413 | 0.65384125 | 0.549070619 | 0.105  |
| cg11644052 | II | 37 | 2  | 69665132  | NFU1;NFU1;NFU1;N   | 0.62 | 0.0001  | 3.98291 | 0.61477596 | 0.719791843 | -0.105 |
| cg13758186 | II | 37 | 2  | 101959136 |                    | 0.46 | 0.01197 | 1.92207 | 0.72699938 | 0.621616218 | 0.105  |
| cg17501982 | II | 37 | 2  | 106417701 | NCK2;NCK2          | 0.42 | 0.02991 | 1.52413 | 0.71090918 | 0.605983146 | 0.105  |
| cg22478317 | II | 37 | 2  | 110271930 |                    | 0.42 | 0.02991 | 1.52413 | 0.64817818 | 0.542910874 | 0.105  |
| cg06197616 | II | 37 | 2  | 128348899 | MYO7B              | 0.46 | 0.01197 | 1.92207 | 0.48966308 | 0.384601563 | 0.105  |
| cg27211696 | II | 37 | 2  | 191398769 | TMEM194B           | 0.46 | 0.01197 | 1.92207 | 0.24889541 | 0.144345814 | 0.105  |
| cg02281854 | II | 37 | 2  | 217428125 |                    | 0.54 | 0.0014  | 2.85345 | 0.77062642 | 0.665581556 | 0.105  |
| cg01604404 | I  | 37 | 2  | 237460590 |                    | 0.5  | 0.00432 | 2.36443 | 0.51451347 | 0.409647997 | 0.105  |
| cg21184951 | II | 37 | 2  | 240168413 | HDAC4              | 0.54 | 0.0014  | 2.85345 | 0.57186738 | 0.677213882 | -0.105 |

|            |    |    |   |                                 |      |          |         |            |             |        |
|------------|----|----|---|---------------------------------|------|----------|---------|------------|-------------|--------|
| cg24574692 | I  | 37 | 2 | 241926608                       | 0.71 | 4.57E-06 | 5.34042 | 0.46985355 | 0.574777837 | -0.105 |
| cg17071731 | II | 37 | 3 | 11127293                        | 0.5  | 0.00432  | 2.36443 | 0.46605548 | 0.5708829   | -0.105 |
| cg24877842 | II | 37 | 3 | 42201898 TRAK1;TRAK1            | 0.42 | 0.02991  | 1.52413 | 0.52490997 | 0.629966807 | -0.105 |
| cg01363198 | II | 37 | 3 | 134878739 EPHB1                 | 0.5  | 0.00432  | 2.36443 | 0.54451847 | 0.439600339 | 0.105  |
| cg13575298 | II | 37 | 3 | 170626725 EIF5A2                | 0.54 | 0.0014   | 2.85345 | 0.57269912 | 0.677860299 | -0.105 |
| cg11935638 | II | 37 | 3 | 184972145 EHHADH;EHHADH         | 0.5  | 0.00432  | 2.36443 | 0.39513895 | 0.499783896 | -0.105 |
| cg02519208 | II | 37 | 3 | 190105821 CLDN16                | 0.5  | 0.00432  | 2.36443 | 0.60565056 | 0.500942874 | 0.105  |
| cg01409693 | I  | 37 | 4 | 1542171                         | 0.5  | 0.00432  | 2.36443 | 0.82607315 | 0.720762086 | 0.105  |
| cg03925294 | II | 37 | 4 | 6247629                         | 0.62 | 0.0001   | 3.98291 | 0.28989935 | 0.394516251 | -0.105 |
| cg11636702 | I  | 37 | 4 | 11370466 MIR572                 | 0.5  | 0.00432  | 2.36443 | 0.42592873 | 0.531092083 | -0.105 |
| cg05476182 | II | 37 | 5 | 133913122 PHF15                 | 0.46 | 0.01197  | 1.92207 | 0.69122792 | 0.795996971 | -0.105 |
| cg10257049 | II | 37 | 5 | 154230308 C5orf4                | 0.42 | 0.02991  | 1.52413 | 0.26241507 | 0.367018823 | -0.105 |
| cg15901722 | II | 37 | 5 | 175974973 PCDH24                | 0.42 | 0.02991  | 1.52413 | 0.42264564 | 0.527405409 | -0.105 |
| cg12230983 | II | 37 | 6 | 15439701 JARID2                 | 0.42 | 0.02991  | 1.52413 | 0.21022794 | 0.315669332 | -0.105 |
| cg10507304 | II | 37 | 6 | 27637520                        | 0.42 | 0.02991  | 1.52413 | 0.26755565 | 0.372727496 | -0.105 |
| cg01400884 | II | 37 | 6 | 28583971                        | 0.46 | 0.01197  | 1.92207 | 0.46787776 | 0.572978465 | -0.105 |
| cg03096746 | II | 37 | 6 | 29795436 HLA-G                  | 0.46 | 0.01197  | 1.92207 | 0.36052294 | 0.465878842 | -0.105 |
| cg07333021 | II | 37 | 6 | 30612330 C6orf134               | 0.46 | 0.01197  | 1.92207 | 0.73126166 | 0.836592122 | -0.105 |
| cg18335326 | I  | 37 | 6 | 30653659 KIAA1949;KIAA1949      | 0.62 | 0.0001   | 3.98291 | 0.23527723 | 0.130005113 | 0.105  |
| cg09232906 | II | 37 | 6 | 30684280 MDC1                   | 0.42 | 0.02991  | 1.52413 | 0.74708212 | 0.64213686  | 0.105  |
| cg10740660 | II | 37 | 6 | 31740849 C6orf27                | 0.67 | 2.34E-05 | 4.63072 | 0.42244792 | 0.527726921 | -0.105 |
| cg05767720 | I  | 37 | 6 | 32117281 PRRT1                  | 0.54 | 0.0014   | 2.85345 | 0.45853901 | 0.353386644 | 0.105  |
| cg19350197 | I  | 37 | 6 | 32782988 HLA-DOB                | 0.54 | 0.0014   | 2.85345 | 0.60861477 | 0.503821232 | 0.105  |
| cg17931986 | II | 37 | 6 | 33131274 COL11A2;COL11A2;       | 0.46 | 0.01197  | 1.92207 | 0.49985385 | 0.604403458 | -0.105 |
| cg02266086 | II | 37 | 6 | 33161336 COL11A2;COL11A2;       | 0.42 | 0.02991  | 1.52413 | 0.48190202 | 0.586847273 | -0.105 |
| cg10494848 | II | 37 | 6 | 57127617                        | 0.5  | 0.00432  | 2.36443 | 0.36760453 | 0.47300181  | -0.105 |
| cg00847453 | II | 37 | 6 | 110720501 DDO;DDO               | 0.54 | 0.0014   | 2.85345 | 0.63910075 | 0.744386625 | -0.105 |
| cg17852032 | II | 37 | 6 | 158066811 ZDHHC14;ZDHHC14       | 0.54 | 0.0014   | 2.85345 | 0.30714335 | 0.412559732 | -0.105 |
| cg23249717 | I  | 37 | 6 | 167507105                       | 0.46 | 0.01197  | 1.92207 | 0.77905155 | 0.673656636 | 0.105  |
| cg10248100 | II | 37 | 7 | 872053 UNC84A;UNC84A            | 0.54 | 0.0014   | 2.85345 | 0.26013583 | 0.155570028 | 0.105  |
| cg27205928 | I  | 37 | 7 | 1062652 C7orf50;C7orf50;C7orf50 | 0.42 | 0.02991  | 1.52413 | 0.72254135 | 0.617827959 | 0.105  |
| cg07556911 | II | 37 | 7 | 2044787 MAD1L1;MAD1L1;MAD1L1    | 0.54 | 0.0014   | 2.85345 | 0.53829785 | 0.432932578 | 0.105  |
| cg01986619 | II | 37 | 7 | 2613963 IQCE;IQCE               | 0.42 | 0.02991  | 1.52413 | 0.82240341 | 0.717777612 | 0.105  |

|            |    |    |    |                           |      |          |         |            |             |        |
|------------|----|----|----|---------------------------|------|----------|---------|------------|-------------|--------|
| cg08241694 | II | 37 | 7  | 50633896 DDC              | 0.42 | 0.02991  | 1.52413 | 0.68184664 | 0.576402657 | 0.105  |
| cg24620463 | I  | 37 | 7  | 95917902 SLC25A13;SLC25A1 | 0.79 | 1.06E-07 | 6.97389 | 0.4495441  | 0.344824173 | 0.105  |
| cg26847503 | II | 37 | 7  | 143056341 FAM131B;FAM131I | 0.46 | 0.01197  | 1.92207 | 0.70081126 | 0.595871993 | 0.105  |
| cg24966363 | II | 37 | 8  | 8932588                   | 0.5  | 0.00432  | 2.36443 | 0.19328317 | 0.298617911 | -0.105 |
| cg13518968 | II | 37 | 8  | 20138378                  | 0.5  | 0.00432  | 2.36443 | 0.79913155 | 0.69408517  | 0.105  |
| cg26027576 | II | 37 | 8  | 27441373                  | 0.58 | 0.00041  | 3.39184 | 0.62563027 | 0.520132579 | 0.105  |
| cg13708803 | II | 37 | 8  | 138898243                 | 0.58 | 0.00041  | 3.39184 | 0.58184434 | 0.476783033 | 0.105  |
| cg06671450 | II | 37 | 9  | 36985987 PAX5             | 0.62 | 0.0001   | 3.98291 | 0.23477563 | 0.33932554  | -0.105 |
| cg15282417 | II | 37 | 9  | 129245246 FAM125B         | 0.42 | 0.02991  | 1.52413 | 0.59978545 | 0.704565095 | -0.105 |
| cg13786567 | II | 37 | 9  | 137258920 RXRA            | 0.5  | 0.00432  | 2.36443 | 0.6674762  | 0.772369363 | -0.105 |
| cg10119075 | II | 37 | 10 | 7709738 ITIH5;ITIH5       | 0.54 | 0.0014   | 2.85345 | 0.12895536 | 0.233773672 | -0.105 |
| cg14156751 | I  | 37 | 10 | 50976571                  | 0.42 | 0.02991  | 1.52413 | 0.38489298 | 0.489666661 | -0.105 |
| cg23196756 | II | 37 | 10 | 72165580 EIF4EBP2         | 0.58 | 0.00041  | 3.39184 | 0.66287479 | 0.767925729 | -0.105 |
| cg12500300 | II | 37 | 10 | 133810178                 | 0.46 | 0.01197  | 1.92207 | 0.81430459 | 0.709796814 | 0.105  |
| cg04537282 | II | 37 | 11 | 331179                    | 0.54 | 0.0014   | 2.85345 | 0.58200209 | 0.477225165 | 0.105  |
| cg02871021 | II | 37 | 11 | 10715715 MRVI1;MRVI1;MRV  | 0.46 | 0.01197  | 1.92207 | 0.78975071 | 0.684266332 | 0.105  |
| cg14780449 | II | 37 | 11 | 44578801                  | 0.58 | 0.00041  | 3.39184 | 0.58474346 | 0.690085887 | -0.105 |
| cg18048562 | II | 37 | 11 | 57232463 RTN4RL2          | 0.5  | 0.00432  | 2.36443 | 0.41942283 | 0.524778572 | -0.105 |
| cg25104637 | II | 37 | 11 | 64405452 NRXN2;NRXN2;NRX  | 0.5  | 0.00432  | 2.36443 | 0.54273957 | 0.438154003 | 0.105  |
| cg23227726 | II | 37 | 11 | 72143885 CLPB             | 0.5  | 0.00432  | 2.36443 | 0.44034539 | 0.545330639 | -0.105 |
| cg07744502 | II | 37 | 11 | 93271083 C11orf75         | 0.5  | 0.00432  | 2.36443 | 0.21941514 | 0.324016727 | -0.105 |
| cg04131101 | II | 37 | 11 | 94427846                  | 0.54 | 0.0014   | 2.85345 | 0.78075781 | 0.675397372 | 0.105  |
| cg09993718 | II | 37 | 11 | 117670657                 | 0.54 | 0.0014   | 2.85345 | 0.48603301 | 0.38075014  | 0.105  |
| cg17465423 | II | 37 | 12 | 54784180 ZNF385A;ZNF385A  | 0.54 | 0.0014   | 2.85345 | 0.30090784 | 0.406346852 | -0.105 |
| cg20051772 | II | 37 | 12 | 56325015 DGKA;DGKA;DGKA;  | 0.54 | 0.0014   | 2.85345 | 0.24192941 | 0.137408267 | 0.105  |
| cg14280382 | II | 37 | 12 | 96094182 NTN4             | 0.5  | 0.00432  | 2.36443 | 0.76428223 | 0.659223214 | 0.105  |
| cg04347477 | I  | 37 | 12 | 125002007 NCOR2;NCOR2     | 0.42 | 0.02991  | 1.52413 | 0.3159386  | 0.421285518 | -0.105 |
| cg23222604 | II | 37 | 12 | 125110933                 | 0.5  | 0.00432  | 2.36443 | 0.15608787 | 0.261089011 | -0.105 |
| cg25840538 | II | 37 | 13 | 114146138 TMCO3;DCUN1D2   | 0.67 | 2.34E-05 | 4.63072 | 0.13675524 | 0.242091089 | -0.105 |
| cg24686983 | II | 37 | 14 | 33832387 NPAS3;NPAS3;NPA! | 0.54 | 0.0014   | 2.85345 | 0.76617306 | 0.661572771 | 0.105  |
| cg01711160 | II | 37 | 14 | 85996499 FLRT2;FLRT2      | 0.58 | 0.00041  | 3.39184 | 0.13439432 | 0.23963599  | -0.105 |
| cg02540736 | II | 37 | 14 | 100774063 SLC25A29;MIR345 | 0.42 | 0.02991  | 1.52413 | 0.51760599 | 0.622913443 | -0.105 |
| cg02883666 | II | 37 | 14 | 101526670 MIR496          | 0.42 | 0.02991  | 1.52413 | 0.70893835 | 0.604423882 | 0.105  |

|            |    |    |    |                            |      |          |         |            |             |        |
|------------|----|----|----|----------------------------|------|----------|---------|------------|-------------|--------|
| cg11831431 | I  | 37 | 15 | 73639105 HCN4              | 0.46 | 0.01197  | 1.92207 | 0.5292993  | 0.423819037 | 0.105  |
| cg21242079 | II | 37 | 15 | 79101063 ADAMTS7           | 0.46 | 0.01197  | 1.92207 | 0.48145072 | 0.376903185 | 0.105  |
| cg05251269 | II | 37 | 16 | 2083128 SLC9A3R2;SLC9A3R   | 0.58 | 0.00041  | 3.39184 | 0.25667496 | 0.361393707 | -0.105 |
| cg04242728 | II | 37 | 16 | 2536153 TBC1D24            | 0.54 | 0.0014   | 2.85345 | 0.52250427 | 0.627212056 | -0.105 |
| cg01126567 | I  | 37 | 16 | 20085047 GPR139;GPR139     | 0.46 | 0.01197  | 1.92207 | 0.03555035 | 0.140201342 | -0.105 |
| cg07726287 | II | 37 | 16 | 84318109                   | 0.46 | 0.01197  | 1.92207 | 0.53175383 | 0.636855935 | -0.105 |
| cg02689514 | I  | 37 | 16 | 88992127 CBFA2T3;CBFA2T3   | 0.5  | 0.00432  | 2.36443 | 0.69049608 | 0.585869711 | 0.105  |
| cg07058377 | II | 37 | 17 | 2041773 SMG6;SMG6          | 0.62 | 0.0001   | 3.98291 | 0.28419777 | 0.389513715 | -0.105 |
| cg16513459 | I  | 37 | 17 | 7832932 KCNAB3             | 0.5  | 0.00432  | 2.36443 | 0.77334529 | 0.668044355 | 0.105  |
| cg01678701 | I  | 37 | 17 | 8250623                    | 0.46 | 0.01197  | 1.92207 | 0.55663449 | 0.661342169 | -0.105 |
| cg11851174 | II | 37 | 17 | 17712609 RAI1              | 0.46 | 0.01197  | 1.92207 | 0.69153574 | 0.586984076 | 0.105  |
| cg19942495 | II | 37 | 17 | 32484027 ACCN1             | 0.58 | 0.00041  | 3.39184 | 0.20731458 | 0.311999484 | -0.105 |
| cg09795027 | II | 37 | 17 | 74006440 EVPL              | 0.79 | 1.06E-07 | 6.97389 | 0.37761582 | 0.482906638 | -0.105 |
| cg10138630 | II | 37 | 17 | 74024966 EVPL              | 0.5  | 0.00432  | 2.36443 | 0.30894716 | 0.413995369 | -0.105 |
| cg12098949 | II | 37 | 17 | 75367442 SEPT9;SEPT9;SEPT9 | 0.42 | 0.02991  | 1.52413 | 0.58342305 | 0.478174615 | 0.105  |
| cg19654743 | II | 37 | 17 | 75446592 SEPT9;SEPT9;SEPT9 | 0.5  | 0.00432  | 2.36443 | 0.52421215 | 0.419071773 | 0.105  |
| cg06513247 | II | 37 | 17 | 75446661 SEPT9;SEPT9;SEPT9 | 0.62 | 0.0001   | 3.98291 | 0.36127888 | 0.2567133   | 0.105  |
| cg04268643 | II | 37 | 17 | 76037239 TNRC6C;TNRC6C     | 0.42 | 0.02991  | 1.52413 | 0.47705186 | 0.581924539 | -0.105 |
| cg22833809 | II | 37 | 17 | 76129984 TMC8;TMC6         | 0.46 | 0.01197  | 1.92207 | 0.36614795 | 0.261153797 | 0.105  |
| cg01498832 | II | 37 | 17 | 78682934 RPTOR;RPTOR       | 0.42 | 0.02991  | 1.52413 | 0.74167315 | 0.846960973 | -0.105 |
| cg26638570 | I  | 37 | 17 | 79409020 BAHCC1            | 0.5  | 0.00432  | 2.36443 | 0.73136419 | 0.835956822 | -0.105 |
| cg19284277 | II | 37 | 17 | 80190054 SLC16A3;SLC16A3;S | 0.5  | 0.00432  | 2.36443 | 0.19201218 | 0.297499383 | -0.105 |
| cg22432760 | I  | 37 | 17 | 80829718 TBCD              | 0.5  | 0.00432  | 2.36443 | 0.70412706 | 0.599324271 | 0.105  |
| cg00663986 | II | 37 | 17 | 80866232 TBCD              | 0.46 | 0.01197  | 1.92207 | 0.66132723 | 0.556269583 | 0.105  |
| cg01635063 | I  | 37 | 19 | 728385 PALM;PALM           | 0.58 | 0.00041  | 3.39184 | 0.69986286 | 0.804726458 | -0.105 |
| cg04804052 | II | 37 | 19 | 11094658 SMARCA4;SMARCA    | 0.46 | 0.01197  | 1.92207 | 0.45454189 | 0.559489889 | -0.105 |
| cg07938642 | II | 37 | 19 | 18338579 PDE4C;PDE4C       | 0.46 | 0.01197  | 1.92207 | 0.72186754 | 0.616651839 | 0.105  |
| cg01485075 | II | 37 | 19 | 22817371 ZNF492            | 0.46 | 0.01197  | 1.92207 | 0.08860297 | 0.193401244 | -0.105 |
| cg15473329 | II | 37 | 19 | 39862918 SAMD4B            | 0.46 | 0.01197  | 1.92207 | 0.73393197 | 0.628672338 | 0.105  |
| cg03313447 | II | 37 | 19 | 41829042 CCDC97            | 0.54 | 0.0014   | 2.85345 | 0.39762858 | 0.502752227 | -0.105 |
| cg14267671 | II | 37 | 19 | 45572412 SFRS16            | 0.54 | 0.0014   | 2.85345 | 0.66161613 | 0.766875552 | -0.105 |
| cg09293816 | II | 37 | 19 | 50015532 FCGRT;FCGRT       | 0.54 | 0.0014   | 2.85345 | 0.2917116  | 0.397109503 | -0.105 |
| cg03117379 | II | 37 | 20 | 17943971 SNORD17;SNX5;SN   | 0.5  | 0.00432  | 2.36443 | 0.68048599 | 0.575785324 | 0.105  |

|            |    |    |    |           |                            |      |         |         |            |             |        |
|------------|----|----|----|-----------|----------------------------|------|---------|---------|------------|-------------|--------|
| cg08271622 | I  | 37 | 20 | 37053969  | LOC388796;SNORA            | 0.5  | 0.00432 | 2.36443 | 0.78678978 | 0.682112582 | 0.105  |
| cg26674160 | I  | 37 | 21 | 48025100  | S100B                      | 0.46 | 0.01197 | 1.92207 | 0.72578485 | 0.830318412 | -0.105 |
| cg17336139 | I  | 37 | 22 | 22901648  | PRAME;PRAME;PRAME          | 0.46 | 0.01197 | 1.92207 | 0.26217766 | 0.157344983 | 0.105  |
| cg19603202 | II | 37 | 22 | 38431726  |                            | 0.42 | 0.02991 | 1.52413 | 0.68915194 | 0.584162582 | 0.105  |
| cg21345826 | II | 37 | 22 | 39353650  | APOBEC3A;APOBEC3B          | 0.58 | 0.00041 | 3.39184 | 0.68110369 | 0.785894337 | -0.105 |
| cg04934530 | II | 37 | 22 | 47080171  |                            | 0.42 | 0.02991 | 1.52413 | 0.63017093 | 0.525081463 | 0.105  |
| cg17848797 | II | 37 | 1  | 1198269   | UBE2J2;UBE2J2;LOC100286519 | 0.54 | 0.0014  | 2.85345 | 0.78757342 | 0.89165108  | -0.104 |
| cg03427058 | I  | 37 | 1  | 1565025   | MIB2;MIB2;MIB2;NIP2        | 0.62 | 0.0001  | 3.98291 | 0.33124292 | 0.227580874 | 0.104  |
| cg19809157 | II | 37 | 1  | 9422438   | SPSB1                      | 0.46 | 0.01197 | 1.92207 | 0.1619908  | 0.26565385  | -0.104 |
| cg13454846 | II | 37 | 1  | 16068375  | TMEM82                     | 0.62 | 0.0001  | 3.98291 | 0.63377972 | 0.529378066 | 0.104  |
| cg18082979 | II | 37 | 1  | 32085118  | HCRTR1                     | 0.5  | 0.00432 | 2.36443 | 0.63444382 | 0.530144558 | 0.104  |
| cg10092779 | II | 37 | 1  | 57294085  |                            | 0.46 | 0.01197 | 1.92207 | 0.76357942 | 0.659461993 | 0.104  |
| cg22488256 | II | 37 | 1  | 66258046  | PDE4B;PDE4B                | 0.46 | 0.01197 | 1.92207 | 0.18922824 | 0.293031479 | -0.104 |
| cg09028383 | II | 37 | 1  | 150980411 | FAM63A;PRUNE;FAM63A-AS1    | 0.5  | 0.00432 | 2.36443 | 0.53011137 | 0.633731113 | -0.104 |
| cg22012476 | II | 37 | 1  | 168664941 | DPT                        | 0.46 | 0.01197 | 1.92207 | 0.75879279 | 0.654886475 | 0.104  |
| cg13209335 | II | 37 | 1  | 180878648 |                            | 0.5  | 0.00432 | 2.36443 | 0.85055674 | 0.746681232 | 0.104  |
| cg26822728 | II | 37 | 1  | 202164063 | LGR6                       | 0.46 | 0.01197 | 1.92207 | 0.59842806 | 0.494000791 | 0.104  |
| cg15490070 | II | 37 | 1  | 203148132 | CHI3L1                     | 0.5  | 0.00432 | 2.36443 | 0.31928125 | 0.423652505 | -0.104 |
| cg15732451 | II | 37 | 1  | 228997949 |                            | 0.42 | 0.02991 | 1.52413 | 0.72999902 | 0.833589026 | -0.104 |
| cg15723468 | II | 37 | 1  | 230387268 | GALNT2                     | 0.46 | 0.01197 | 1.92207 | 0.82160996 | 0.717562311 | 0.104  |
| cg12647574 | II | 37 | 2  | 12824729  |                            | 0.5  | 0.00432 | 2.36443 | 0.25048201 | 0.354889458 | -0.104 |
| cg05360477 | II | 37 | 2  | 12959313  |                            | 0.5  | 0.00432 | 2.36443 | 0.60652422 | 0.710297858 | -0.104 |
| cg25784219 | II | 37 | 2  | 28618328  | FOSL2                      | 0.46 | 0.01197 | 1.92207 | 0.19662939 | 0.300258176 | -0.104 |
| cg23688350 | II | 37 | 2  | 110317956 | SEPT10;SEPT10              | 0.54 | 0.0014  | 2.85345 | 0.78725467 | 0.683748626 | 0.104  |
| cg05208178 | II | 37 | 2  | 233928423 | INPP5D;INPP5D              | 0.5  | 0.00432 | 2.36443 | 0.21701336 | 0.112977618 | 0.104  |
| cg03626672 | II | 37 | 2  | 237478664 | CXCR7                      | 0.46 | 0.01197 | 1.92207 | 0.68817784 | 0.584549159 | 0.104  |
| cg02135859 | II | 37 | 2  | 239140634 | LOC643387;LOC151375        | 0.46 | 0.01197 | 1.92207 | 0.5069797  | 0.611425352 | -0.104 |
| cg15978561 | II | 37 | 2  | 240196996 | HDAC4                      | 0.46 | 0.01197 | 1.92207 | 0.29052993 | 0.394871139 | -0.104 |
| cg06519434 | II | 37 | 3  | 38664257  | SCN5A;SCN5A;SCN5A-AS1      | 0.5  | 0.00432 | 2.36443 | 0.61998905 | 0.515754395 | 0.104  |
| cg01368219 | II | 37 | 3  | 54999791  | CACNA2D3                   | 0.5  | 0.00432 | 2.36443 | 0.56862498 | 0.672835635 | -0.104 |
| cg05963085 | II | 37 | 3  | 112359648 | CCDC80;CCDC80;CCDC80-AS1   | 0.5  | 0.00432 | 2.36443 | 0.36890697 | 0.472569487 | -0.104 |
| cg14456683 | II | 37 | 3  | 147127010 | ZIC1                       | 0.58 | 0.00041 | 3.39184 | 0.27050424 | 0.374426936 | -0.104 |
| cg10498502 | II | 37 | 3  | 185928164 | DGKG;DGKG;DGKG             | 0.42 | 0.02991 | 1.52413 | 0.30140515 | 0.405603167 | -0.104 |

|            |    |    |    |                             |      |         |         |            |             |        |
|------------|----|----|----|-----------------------------|------|---------|---------|------------|-------------|--------|
| cg01945624 | II | 37 | 4  | 8230847 SH3TC1              | 0.54 | 0.0014  | 2.85345 | 0.48783108 | 0.384239356 | 0.104  |
| cg14366742 | I  | 37 | 4  | 8546989                     | 0.46 | 0.01197 | 1.92207 | 0.49172651 | 0.388166355 | 0.104  |
| cg01294808 | I  | 37 | 5  | 3599686 IRX1                | 0.46 | 0.01197 | 1.92207 | 0.30958958 | 0.413194272 | -0.104 |
| cg10581071 | II | 37 | 5  | 10653304 ANKRD33B           | 0.5  | 0.00432 | 2.36443 | 0.66876906 | 0.772490897 | -0.104 |
| cg03602014 | II | 37 | 5  | 126564681                   | 0.46 | 0.01197 | 1.92207 | 0.37524386 | 0.479073297 | -0.104 |
| cg24119225 | II | 37 | 5  | 140344483 PCDHA7;PCDHAC2;   | 0.42 | 0.02991 | 1.52413 | 0.69782582 | 0.593337477 | 0.104  |
| cg19646897 | II | 37 | 5  | 156536379 HAVCR2            | 0.46 | 0.01197 | 1.92207 | 0.53128728 | 0.426847119 | 0.104  |
| cg26729204 | II | 37 | 6  | 2932241                     | 0.5  | 0.00432 | 2.36443 | 0.41108541 | 0.306871107 | 0.104  |
| cg18113826 | II | 37 | 6  | 31583942 AIF1;AIF1;AIF1     | 0.5  | 0.00432 | 2.36443 | 0.14154509 | 0.245782678 | -0.104 |
| cg16072814 | II | 37 | 6  | 32189397 NOTCH4             | 0.46 | 0.01197 | 1.92207 | 0.72382069 | 0.619938405 | 0.104  |
| cg12699756 | II | 37 | 6  | 33173482 HSD17B8            | 0.46 | 0.01197 | 1.92207 | 0.79339385 | 0.68890386  | 0.104  |
| cg17762073 | I  | 37 | 6  | 34024220 GRM4               | 0.5  | 0.00432 | 2.36443 | 0.49590906 | 0.392348935 | 0.104  |
| cg07037963 | II | 37 | 6  | 43265846 SLC22A7;SLC22A7    | 0.46 | 0.01197 | 1.92207 | 0.60749059 | 0.503282197 | 0.104  |
| cg09783253 | I  | 37 | 6  | 157932130 ZDHHC14;ZDHHC14   | 0.46 | 0.01197 | 1.92207 | 0.45100062 | 0.554943113 | -0.104 |
| cg08973950 | I  | 37 | 7  | 1083309 C7orf50;C7orf50;C7  | 0.42 | 0.02991 | 1.52413 | 0.57128854 | 0.675044534 | -0.104 |
| cg00589581 | II | 37 | 7  | 1883760 MAD1L1;MAD1L1;M     | 0.42 | 0.02991 | 1.52413 | 0.48341898 | 0.379184599 | 0.104  |
| cg00502509 | I  | 37 | 7  | 1956121 MAD1L1;MAD1L1;M     | 0.54 | 0.0014  | 2.85345 | 0.82612927 | 0.930239925 | -0.104 |
| cg04260633 | II | 37 | 7  | 2687305 TTYH3               | 0.54 | 0.0014  | 2.85345 | 0.53295803 | 0.637433096 | -0.104 |
| cg12190994 | II | 37 | 7  | 4305061 SDK1;SDK1           | 0.46 | 0.01197 | 1.92207 | 0.40213376 | 0.506371266 | -0.104 |
| cg06480942 | II | 37 | 7  | 73116029 STX1A;STX1A        | 0.62 | 0.0001  | 3.98291 | 0.6776104  | 0.7814968   | -0.104 |
| cg09343421 | II | 37 | 7  | 100483511 SRRT;SRRT;SRRT;SR | 0.62 | 0.0001  | 3.98291 | 0.64248454 | 0.5383789   | 0.104  |
| cg07783094 | II | 37 | 7  | 157956912 PTPRN2;PTPRN2;PT  | 0.62 | 0.0001  | 3.98291 | 0.53206772 | 0.636561511 | -0.104 |
| cg01770362 | II | 37 | 8  | 23385913 SLC25A37           | 0.46 | 0.01197 | 1.92207 | 0.61701332 | 0.721233787 | -0.104 |
| cg13822256 | II | 37 | 8  | 24811266 NEFL               | 0.54 | 0.0014  | 2.85345 | 0.7631956  | 0.659369863 | 0.104  |
| cg22995724 | I  | 37 | 8  | 144639363 GSDMD;GSDMD       | 0.54 | 0.0014  | 2.85345 | 0.86327374 | 0.967472834 | -0.104 |
| cg13832290 | I  | 37 | 9  | 35649906 SIT1               | 0.54 | 0.0014  | 2.85345 | 0.80129449 | 0.697512455 | 0.104  |
| cg02385728 | II | 37 | 9  | 133803377 FIBCD1;FIBCD1     | 0.42 | 0.02991 | 1.52413 | 0.76790275 | 0.663988284 | 0.104  |
| cg14331623 | II | 37 | 9  | 134155084                   | 0.46 | 0.01197 | 1.92207 | 0.80531466 | 0.7011355   | 0.104  |
| cg26129108 | II | 37 | 9  | 134698926                   | 0.5  | 0.00432 | 2.36443 | 0.61795533 | 0.513710105 | 0.104  |
| cg05493344 | II | 37 | 9  | 136567064 SARDH;SARDH       | 0.42 | 0.02991 | 1.52413 | 0.58789553 | 0.484017351 | 0.104  |
| cg21120249 | II | 37 | 9  | 139921971 C9orf139;C9orf139 | 0.58 | 0.00041 | 3.39184 | 0.56903062 | 0.673088823 | -0.104 |
| cg02313434 | II | 37 | 10 | 5508980                     | 0.46 | 0.01197 | 1.92207 | 0.69885805 | 0.802587613 | -0.104 |
| cg24385652 | II | 37 | 10 | 50329828                    | 0.46 | 0.01197 | 1.92207 | 0.73460271 | 0.630714674 | 0.104  |

|            |    |    |    |                             |      |          |         |            |             |        |
|------------|----|----|----|-----------------------------|------|----------|---------|------------|-------------|--------|
| cg12800012 | I  | 37 | 10 | 105600413 SH3PXD2A          | 0.58 | 0.00041  | 3.39184 | 0.73890553 | 0.843253129 | -0.104 |
| cg17624196 | II | 37 | 10 | 131841008                   | 0.46 | 0.01197  | 1.92207 | 0.4660025  | 0.362389086 | 0.104  |
| cg16129800 | II | 37 | 11 | 2920414 SLC22A18AS;SLC22A   | 0.67 | 2.34E-05 | 4.63072 | 0.30550574 | 0.409170291 | -0.104 |
| cg01607369 | II | 37 | 11 | 7598673 PPFIBP2             | 0.54 | 0.0014   | 2.85345 | 0.37035741 | 0.474102535 | -0.104 |
| cg14338590 | II | 37 | 11 | 16848924 PLEKHA7            | 0.42 | 0.02991  | 1.52413 | 0.74269325 | 0.638319433 | 0.104  |
| cg08479635 | II | 37 | 11 | 45114570 PRDM11             | 0.54 | 0.0014   | 2.85345 | 0.25759104 | 0.36152119  | -0.104 |
| cg14472806 | II | 37 | 11 | 66055327 YIF1A              | 0.62 | 0.0001   | 3.98291 | 0.23861485 | 0.342286367 | -0.104 |
| cg18002602 | II | 37 | 11 | 66138449 SLC29A2            | 0.54 | 0.0014   | 2.85345 | 0.27192199 | 0.37545832  | -0.104 |
| cg23456595 | I  | 37 | 11 | 67203434 PTPRCAP            | 0.42 | 0.02991  | 1.52413 | 0.71242896 | 0.608612114 | 0.104  |
| cg23130075 | II | 37 | 11 | 67418365 ACY3               | 0.54 | 0.0014   | 2.85345 | 0.45781779 | 0.353971487 | 0.104  |
| cg25633067 | II | 37 | 11 | 68037299 C11orf24           | 0.62 | 0.0001   | 3.98291 | 0.66166219 | 0.765404602 | -0.104 |
| cg06441398 | II | 37 | 11 | 70317455 SHANK2;SHANK2      | 0.42 | 0.02991  | 1.52413 | 0.68340688 | 0.579008812 | 0.104  |
| cg25899154 | II | 37 | 11 | 72897143                    | 0.46 | 0.01197  | 1.92207 | 0.69437022 | 0.798485853 | -0.104 |
| cg11308643 | II | 37 | 11 | 105480788 GRIA4;GRIA4;GRIA4 | 0.5  | 0.00432  | 2.36443 | 0.1607409  | 0.265144309 | -0.104 |
| cg09251429 | I  | 37 | 11 | 124735128 ROBO3             | 0.42 | 0.02991  | 1.52413 | 0.18394678 | 0.287902587 | -0.104 |
| cg22372285 | II | 37 | 11 | 125951005                   | 0.42 | 0.02991  | 1.52413 | 0.80225037 | 0.698154809 | 0.104  |
| cg06823681 | II | 37 | 12 | 324682 SLC6A12              | 0.54 | 0.0014   | 2.85345 | 0.76175851 | 0.657619747 | 0.104  |
| cg13186830 | II | 37 | 12 | 4141193                     | 0.5  | 0.00432  | 2.36443 | 0.21914531 | 0.322769215 | -0.104 |
| cg01661897 | II | 37 | 12 | 4671207                     | 0.54 | 0.0014   | 2.85345 | 0.30578952 | 0.409325489 | -0.104 |
| cg00470817 | II | 37 | 12 | 6741882 LPAR5;LPAR5         | 0.42 | 0.02991  | 1.52413 | 0.74802137 | 0.644001968 | 0.104  |
| cg13575925 | I  | 37 | 12 | 9217583 LOC144571           | 0.42 | 0.02991  | 1.52413 | 0.27963785 | 0.383326523 | -0.104 |
| cg06547285 | II | 37 | 12 | 47630263 FAM113B            | 0.42 | 0.02991  | 1.52413 | 0.75992621 | 0.864230893 | -0.104 |
| cg23539261 | II | 37 | 12 | 48228889                    | 0.42 | 0.02991  | 1.52413 | 0.57648261 | 0.680643314 | -0.104 |
| cg12541478 | II | 37 | 12 | 52444020 NR4A1;NR4A1        | 0.46 | 0.01197  | 1.92207 | 0.76739567 | 0.663561784 | 0.104  |
| cg01815626 | II | 37 | 12 | 52890212                    | 0.46 | 0.01197  | 1.92207 | 0.61820956 | 0.513863216 | 0.104  |
| cg01797169 | II | 37 | 12 | 107711489 BTBD11            | 0.54 | 0.0014   | 2.85345 | 0.38455554 | 0.488368722 | -0.104 |
| cg03884572 | II | 37 | 12 | 111521899 CUX2              | 0.54 | 0.0014   | 2.85345 | 0.57884198 | 0.474580236 | 0.104  |
| cg14602393 | II | 37 | 12 | 133343405                   | 0.42 | 0.02991  | 1.52413 | 0.56207291 | 0.665715016 | -0.104 |
| cg27152219 | I  | 37 | 13 | 20139028                    | 0.42 | 0.02991  | 1.52413 | 0.57538839 | 0.471540491 | 0.104  |
| cg02192281 | II | 37 | 13 | 48478591                    | 0.5  | 0.00432  | 2.36443 | 0.73926678 | 0.842996753 | -0.104 |
| cg07861790 | I  | 37 | 13 | 112761844                   | 0.46 | 0.01197  | 1.92207 | 0.51971656 | 0.623338775 | -0.104 |
| cg23013564 | II | 37 | 13 | 114786887 RASA3             | 0.54 | 0.0014   | 2.85345 | 0.83727943 | 0.733561447 | 0.104  |
| cg24456744 | II | 37 | 13 | 114849719 RASA3             | 0.75 | 7.61E-07 | 6.11857 | 0.75683704 | 0.86069986  | -0.104 |

|            |    |    |    |           |                  |      |          |         |            |             |        |
|------------|----|----|----|-----------|------------------|------|----------|---------|------------|-------------|--------|
| cg18617527 | I  | 37 | 14 | 100014679 | CCDC85C          | 0.42 | 0.02991  | 1.52413 | 0.84273573 | 0.738719795 | 0.104  |
| cg14245199 | II | 37 | 14 | 100540291 | EVL              | 0.46 | 0.01197  | 1.92207 | 0.78938885 | 0.685026888 | 0.104  |
| cg07452706 | II | 37 | 14 | 105649097 | NUDT14           | 0.54 | 0.0014   | 2.85345 | 0.39224364 | 0.49596761  | -0.104 |
| cg19927100 | II | 37 | 15 | 68902085  | CORO2B           | 0.5  | 0.00432  | 2.36443 | 0.71126454 | 0.606937    | 0.104  |
| cg27294796 | II | 37 | 15 | 90456387  | C15orf38         | 0.5  | 0.00432  | 2.36443 | 0.30269628 | 0.406293472 | -0.104 |
| cg06810647 | II | 37 | 16 | 1665094   | CRAMP1L          | 0.54 | 0.0014   | 2.85345 | 0.10572637 | 0.209613192 | -0.104 |
| cg16454902 | II | 37 | 16 | 27414272  | IL21R;IL21R      | 0.54 | 0.0014   | 2.85345 | 0.25142165 | 0.147796752 | 0.104  |
| cg03427663 | II | 37 | 16 | 30445585  |                  | 0.54 | 0.0014   | 2.85345 | 0.1095959  | 0.213547102 | -0.104 |
| cg02364831 | II | 37 | 16 | 52417584  |                  | 0.5  | 0.00432  | 2.36443 | 0.41652017 | 0.312713941 | 0.104  |
| cg17463287 | II | 37 | 16 | 71475335  |                  | 0.5  | 0.00432  | 2.36443 | 0.43417479 | 0.537979066 | -0.104 |
| cg05918327 | II | 37 | 16 | 72955295  | ZFHX3;ZFHX3      | 0.54 | 0.0014   | 2.85345 | 0.45574301 | 0.559416428 | -0.104 |
| cg27132152 | II | 37 | 16 | 88705016  | IL17C;IL17C      | 0.42 | 0.02991  | 1.52413 | 0.35685803 | 0.252643376 | 0.104  |
| cg24071064 | II | 37 | 16 | 88765233  | RNF166           | 0.42 | 0.02991  | 1.52413 | 0.55824716 | 0.454328637 | 0.104  |
| cg27299033 | I  | 37 | 17 | 1883179   | RTN4RL1          | 0.42 | 0.02991  | 1.52413 | 0.92121185 | 0.817307753 | 0.104  |
| cg17580614 | II | 37 | 17 | 15849512  | ADORA2B          | 0.42 | 0.02991  | 1.52413 | 0.6995099  | 0.803353184 | -0.104 |
| cg14270687 | I  | 37 | 17 | 32953574  | TMEM132E         | 0.42 | 0.02991  | 1.52413 | 0.25260388 | 0.356641846 | -0.104 |
| cg13443575 | I  | 37 | 17 | 33775961  | SLFN13           | 0.46 | 0.01197  | 1.92207 | 0.09793697 | 0.202270914 | -0.104 |
| cg02627216 | II | 37 | 17 | 38599056  | IGFBP4           | 0.46 | 0.01197  | 1.92207 | 0.37301314 | 0.477085251 | -0.104 |
| cg00679763 | II | 37 | 17 | 46993161  | UBE2Z            | 0.42 | 0.02991  | 1.52413 | 0.83373149 | 0.729566657 | 0.104  |
| cg16723994 | II | 37 | 17 | 56401623  | BZRAP1;BZRAP1    | 0.54 | 0.0014   | 2.85345 | 0.70712016 | 0.811329942 | -0.104 |
| cg10275770 | II | 37 | 17 | 62084205  | ICAM2;ICAM2;ICAM | 0.54 | 0.0014   | 2.85345 | 0.29845759 | 0.402198159 | -0.104 |
| cg27180671 | II | 37 | 17 | 65527566  | PITPNC1;PITPNC1  | 0.46 | 0.01197  | 1.92207 | 0.79204382 | 0.688420383 | 0.104  |
| cg04908905 | II | 37 | 17 | 71434049  | SDK2             | 0.42 | 0.02991  | 1.52413 | 0.71343202 | 0.60984154  | 0.104  |
| cg17529058 | II | 37 | 17 | 72886179  | FADS6            | 0.5  | 0.00432  | 2.36443 | 0.75718228 | 0.653241583 | 0.104  |
| cg07316730 | II | 37 | 17 | 73316721  | GRB2;GRB2        | 0.46 | 0.01197  | 1.92207 | 0.81964249 | 0.716040454 | 0.104  |
| cg04498014 | II | 37 | 17 | 76037250  | TNRC6C;TNRC6C    | 0.46 | 0.01197  | 1.92207 | 0.46384156 | 0.567551682 | -0.104 |
| cg00249503 | II | 37 | 17 | 76565078  | DNAH17           | 0.71 | 4.57E-06 | 5.34042 | 0.71338265 | 0.817176601 | -0.104 |
| cg22549408 | II | 37 | 18 | 57566300  | PMAIP1           | 0.54 | 0.0014   | 2.85345 | 0.55237046 | 0.656097757 | -0.104 |
| cg06773488 | II | 37 | 18 | 74726002  | MBP;MBP;MBP;ME   | 0.54 | 0.0014   | 2.85345 | 0.73647368 | 0.840814075 | -0.104 |
| cg10929690 | II | 37 | 18 | 77376689  |                  | 0.46 | 0.01197  | 1.92207 | 0.59065157 | 0.694604683 | -0.104 |
| cg25806655 | I  | 37 | 19 | 4543498   | SEMA6B           | 0.42 | 0.02991  | 1.52413 | 0.54569404 | 0.649642442 | -0.104 |
| cg04512965 | II | 37 | 19 | 6038846   | RFX2;RFX2        | 0.54 | 0.0014   | 2.85345 | 0.75534087 | 0.65124603  | 0.104  |
| cg18530645 | I  | 37 | 19 | 12759156  | MAN2B1           | 0.67 | 2.34E-05 | 4.63072 | 0.63730273 | 0.741214158 | -0.104 |

|            |    |    |    |                              |      |          |         |            |             |        |
|------------|----|----|----|------------------------------|------|----------|---------|------------|-------------|--------|
| cg22625098 | I  | 37 | 19 | 13054718 CALR                | 0.46 | 0.01197  | 1.92207 | 0.54161145 | 0.64581978  | -0.104 |
| cg24917775 | I  | 37 | 19 | 46526675 PGLYRP1             | 0.46 | 0.01197  | 1.92207 | 0.26537847 | 0.369414796 | -0.104 |
| cg22312354 | II | 37 | 19 | 56158714 CCDC106             | 0.42 | 0.02991  | 1.52413 | 0.7381587  | 0.634196974 | 0.104  |
| cg11546251 | II | 37 | 19 | 58322078 ZNF552              | 0.5  | 0.00432  | 2.36443 | 0.74694631 | 0.850988691 | -0.104 |
| cg10118435 | II | 37 | 20 | 390551 RBCK1;RBCK1           | 0.5  | 0.00432  | 2.36443 | 0.36991559 | 0.26597781  | 0.104  |
| cg20993403 | II | 37 | 20 | 34700329 EPB41L1             | 0.42 | 0.02991  | 1.52413 | 0.78191341 | 0.677834107 | 0.104  |
| cg01700462 | II | 37 | 20 | 45179230 C20orf123           | 0.5  | 0.00432  | 2.36443 | 0.20149576 | 0.305324982 | -0.104 |
| cg18523477 | II | 37 | 20 | 55967503 RBM38;RBM38         | 0.54 | 0.0014   | 2.85345 | 0.37997231 | 0.276210037 | 0.104  |
| cg15004136 | I  | 37 | 20 | 62687986 TCEA2               | 0.5  | 0.00432  | 2.36443 | 0.23002103 | 0.334185913 | -0.104 |
| cg23366234 | I  | 37 | 21 | 45713704 AIRE;AIRE           | 0.62 | 0.0001   | 3.98291 | 0.93397187 | 0.829502164 | 0.104  |
| cg03171478 | II | 37 | 22 | 37572916                     | 0.67 | 2.34E-05 | 4.63072 | 0.12317043 | 0.227338488 | -0.104 |
| cg14153654 | II | 37 | 1  | 8001027 TNFRSF9              | 0.58 | 0.00041  | 3.39184 | 0.456683   | 0.353731601 | 0.103  |
| cg07233952 | II | 37 | 1  | 22881200                     | 0.5  | 0.00432  | 2.36443 | 0.52033659 | 0.62381534  | -0.103 |
| cg00576075 | II | 37 | 1  | 85725654 C1orf52;C1orf52     | 0.58 | 0.00041  | 3.39184 | 0.58931399 | 0.692647652 | -0.103 |
| cg16315020 | II | 37 | 1  | 109359175 AKNAD1             | 0.46 | 0.01197  | 1.92207 | 0.58934772 | 0.691912802 | -0.103 |
| cg06180389 | II | 37 | 1  | 111436823 CD53;CD53          | 0.46 | 0.01197  | 1.92207 | 0.62005416 | 0.517212931 | 0.103  |
| cg09330596 | II | 37 | 1  | 151313760 RFX5;RFX5          | 0.46 | 0.01197  | 1.92207 | 0.74581199 | 0.848849201 | -0.103 |
| cg23092820 | II | 37 | 1  | 153329512 S100A9             | 0.42 | 0.02991  | 1.52413 | 0.59363361 | 0.696195451 | -0.103 |
| cg15723874 | II | 37 | 1  | 156457945 MEF2D              | 0.46 | 0.01197  | 1.92207 | 0.63992786 | 0.537205106 | 0.103  |
| cg05937055 | II | 37 | 1  | 181128764                    | 0.46 | 0.01197  | 1.92207 | 0.26051016 | 0.157068376 | 0.103  |
| cg06875985 | II | 37 | 1  | 182572153 RGS16              | 0.46 | 0.01197  | 1.92207 | 0.78533041 | 0.682664161 | 0.103  |
| cg19240637 | II | 37 | 2  | 7172297 RNF144A              | 0.5  | 0.00432  | 2.36443 | 0.62054433 | 0.723839755 | -0.103 |
| cg24351076 | II | 37 | 2  | 96992044 ITPRIPL1;ITPRIPL1;I | 0.46 | 0.01197  | 1.92207 | 0.80380097 | 0.701053545 | 0.103  |
| cg22931002 | II | 37 | 2  | 97541870 FAM178B;FAM178I     | 0.79 | 1.06E-07 | 6.97389 | 0.66360041 | 0.766923186 | -0.103 |
| cg11636504 | II | 37 | 2  | 99439883 C2orf55             | 0.58 | 0.00041  | 3.39184 | 0.45214789 | 0.555141037 | -0.103 |
| cg22016779 | II | 37 | 2  | 230452311 DNER               | 0.54 | 0.0014   | 2.85345 | 0.255293   | 0.152082599 | 0.103  |
| cg10901633 | II | 37 | 3  | 4814459 ITPR1;ITPR1;ITPR1    | 0.42 | 0.02991  | 1.52413 | 0.66156519 | 0.764901479 | -0.103 |
| cg26692003 | I  | 37 | 3  | 13063165 IQSEC1              | 0.5  | 0.00432  | 2.36443 | 0.53783501 | 0.434523274 | 0.103  |
| cg01565013 | II | 37 | 3  | 46785957 PRSS45              | 0.46 | 0.01197  | 1.92207 | 0.74771254 | 0.644354857 | 0.103  |
| cg15475502 | II | 37 | 3  | 122662340 SEMA5B             | 0.54 | 0.0014   | 2.85345 | 0.38690044 | 0.284170668 | 0.103  |
| cg14549906 | I  | 37 | 3  | 197500745 FYTDD1;FYTDD1;FYI  | 0.42 | 0.02991  | 1.52413 | 0.87542778 | 0.77213788  | 0.103  |
| cg08029287 | II | 37 | 4  | 1503238                      | 0.54 | 0.0014   | 2.85345 | 0.52145335 | 0.418358885 | 0.103  |
| cg18883033 | I  | 37 | 4  | 3742181                      | 0.46 | 0.01197  | 1.92207 | 0.70227243 | 0.599270189 | 0.103  |

|            |    |    |   |                          |      |          |         |            |             |        |
|------------|----|----|---|--------------------------|------|----------|---------|------------|-------------|--------|
| cg25970575 | I  | 37 | 4 | 6010164                  | 0.5  | 0.00432  | 2.36443 | 0.50583704 | 0.608399197 | -0.103 |
| cg08813325 | II | 37 | 4 | 7699611 SORCS2           | 0.5  | 0.00432  | 2.36443 | 0.34366403 | 0.446831662 | -0.103 |
| cg16581308 | II | 37 | 4 | 16862080 LDB2;LDB2       | 0.46 | 0.01197  | 1.92207 | 0.84707655 | 0.744525014 | 0.103  |
| cg13184823 | I  | 37 | 4 | 187476599 MTNR1A         | 0.46 | 0.01197  | 1.92207 | 0.05360807 | 0.156292518 | -0.103 |
| cg21558614 | II | 37 | 5 | 754184                   | 0.54 | 0.0014   | 2.85345 | 0.69135996 | 0.588457454 | 0.103  |
| cg21510348 | II | 37 | 5 | 72596752                 | 0.42 | 0.02991  | 1.52413 | 0.26182085 | 0.364329538 | -0.103 |
| cg16549809 | II | 37 | 5 | 149821291                | 0.67 | 2.34E-05 | 4.63072 | 0.75425847 | 0.857435307 | -0.103 |
| cg18465082 | II | 37 | 5 | 176734745 MXD3;MXD3      | 0.58 | 0.00041  | 3.39184 | 0.52932291 | 0.631838764 | -0.103 |
| cg03910874 | II | 37 | 6 | 209712                   | 0.54 | 0.0014   | 2.85345 | 0.53233264 | 0.429094911 | 0.103  |
| cg16787652 | II | 37 | 6 | 29759955 HCG4            | 0.46 | 0.01197  | 1.92207 | 0.14303975 | 0.245910001 | -0.103 |
| cg06887580 | II | 37 | 6 | 31550699 LTB;LTB         | 0.42 | 0.02991  | 1.52413 | 0.76046243 | 0.657889011 | 0.103  |
| cg25403205 | II | 37 | 6 | 31584215 AIF1;AIF1;AIF1  | 0.42 | 0.02991  | 1.52413 | 0.17118992 | 0.273900056 | -0.103 |
| cg04938317 | I  | 37 | 6 | 32015737 TNXB            | 0.5  | 0.00432  | 2.36443 | 0.90133887 | 0.798515815 | 0.103  |
| cg08331398 | II | 37 | 6 | 32808918 PSMB8;PSMB8     | 0.46 | 0.01197  | 1.92207 | 0.81222178 | 0.70944403  | 0.103  |
| cg12241963 | II | 37 | 6 | 33807279                 | 0.54 | 0.0014   | 2.85345 | 0.31700887 | 0.420079051 | -0.103 |
| cg07544796 | I  | 37 | 6 | 36817048                 | 0.46 | 0.01197  | 1.92207 | 0.18121478 | 0.283972683 | -0.103 |
| cg07541160 | II | 37 | 6 | 36985879 FGD2            | 0.54 | 0.0014   | 2.85345 | 0.76199162 | 0.659399231 | 0.103  |
| cg00389341 | I  | 37 | 6 | 37190260 TMEM217;TMEM217 | 0.71 | 4.57E-06 | 5.34042 | 0.32904786 | 0.225668074 | 0.103  |
| cg14422240 | II | 37 | 6 | 37425031 FTSJD2          | 0.58 | 0.00041  | 3.39184 | 0.79102882 | 0.89448058  | -0.103 |
| cg04652496 | II | 37 | 6 | 46294097 RCAN2           | 0.46 | 0.01197  | 1.92207 | 0.79715354 | 0.694529261 | 0.103  |
| cg18192491 | II | 37 | 6 | 114384871 HS3ST5         | 0.46 | 0.01197  | 1.92207 | 0.73174276 | 0.629059964 | 0.103  |
| cg03678062 | I  | 37 | 6 | 149772716 ZC3H12D        | 0.5  | 0.00432  | 2.36443 | 0.51147149 | 0.614596999 | -0.103 |
| cg03209720 | II | 37 | 6 | 157727126 C6orf35        | 0.62 | 0.0001   | 3.98291 | 0.34564875 | 0.448585886 | -0.103 |
| cg25820728 | I  | 37 | 7 | 1684706                  | 0.46 | 0.01197  | 1.92207 | 0.91172008 | 0.809189369 | 0.103  |
| cg11796827 | I  | 37 | 7 | 6435978 RAC1;RAC1        | 0.54 | 0.0014   | 2.85345 | 0.27186014 | 0.375002029 | -0.103 |
| cg20720686 | II | 37 | 7 | 75582881 POR             | 0.5  | 0.00432  | 2.36443 | 0.75933563 | 0.861854811 | -0.103 |
| cg11860434 | I  | 37 | 7 | 102067440                | 0.58 | 0.00041  | 3.39184 | 0.19409627 | 0.0914761   | 0.103  |
| cg09507934 | II | 37 | 7 | 102072549 ORAI2;ORAI2    | 0.5  | 0.00432  | 2.36443 | 0.40738455 | 0.304143394 | 0.103  |
| cg21253590 | II | 37 | 7 | 102073120 ORAI2;ORAI2    | 0.5  | 0.00432  | 2.36443 | 0.79480758 | 0.691430599 | 0.103  |
| cg14938677 | II | 37 | 7 | 127231698 ARF5           | 0.5  | 0.00432  | 2.36443 | 0.62960157 | 0.732151713 | -0.103 |
| cg08360009 | II | 37 | 7 | 150433540 GIMAP5         | 0.58 | 0.00041  | 3.39184 | 0.80996376 | 0.707451367 | 0.103  |
| cg00030005 | II | 37 | 7 | 155129409                | 0.54 | 0.0014   | 2.85345 | 0.84765746 | 0.74463386  | 0.103  |
| cg09963024 | II | 37 | 8 | 6663226                  | 0.46 | 0.01197  | 1.92207 | 0.80880972 | 0.706217183 | 0.103  |

|            |    |    |    |                             |      |          |         |            |             |        |
|------------|----|----|----|-----------------------------|------|----------|---------|------------|-------------|--------|
| cg14301348 | I  | 37 | 8  | 20109523 LZTS1              | 0.5  | 0.00432  | 2.36443 | 0.80858197 | 0.705508911 | 0.103  |
| cg21514735 | II | 37 | 8  | 61325952                    | 0.46 | 0.01197  | 1.92207 | 0.55413016 | 0.6575036   | -0.103 |
| cg00831710 | I  | 37 | 8  | 144240945 LY6H;LY6H;LY6H    | 0.42 | 0.02991  | 1.52413 | 0.26753156 | 0.370702225 | -0.103 |
| cg19405177 | II | 37 | 8  | 145001428 PLEC1;PLEC1;PLEC1 | 0.54 | 0.0014   | 2.85345 | 0.70231845 | 0.804955859 | -0.103 |
| cg07173635 | II | 37 | 9  | 971480                      | 0.54 | 0.0014   | 2.85345 | 0.14867509 | 0.251642723 | -0.103 |
| cg14187724 | II | 37 | 9  | 93799798                    | 0.54 | 0.0014   | 2.85345 | 0.14092823 | 0.244228563 | -0.103 |
| cg13781414 | II | 37 | 9  | 138951648 NACC2             | 0.62 | 0.0001   | 3.98291 | 0.6417613  | 0.744322615 | -0.103 |
| cg08100069 | II | 37 | 9  | 139014709                   | 0.71 | 4.57E-06 | 5.34042 | 0.38309024 | 0.486313731 | -0.103 |
| cg17505469 | II | 37 | 10 | 8373450                     | 0.46 | 0.01197  | 1.92207 | 0.80317572 | 0.700329788 | 0.103  |
| cg04276417 | II | 37 | 10 | 33227909 ITGB1;ITGB1        | 0.62 | 0.0001   | 3.98291 | 0.36276731 | 0.465339351 | -0.103 |
| cg01839993 | II | 37 | 10 | 74034644 DDIT4              | 0.58 | 0.00041  | 3.39184 | 0.30665506 | 0.203859386 | 0.103  |
| cg25965774 | II | 37 | 10 | 126841033 CTBP2;CTBP2       | 0.58 | 0.00041  | 3.39184 | 0.24053321 | 0.34364499  | -0.103 |
| cg08926253 | II | 37 | 11 | 614761 IRF7;IRF7;IRF7       | 0.46 | 0.01197  | 1.92207 | 0.56554948 | 0.668114689 | -0.103 |
| cg07096953 | I  | 37 | 11 | 2154255 INS-IGF2;IGF2;IGF2; | 0.5  | 0.00432  | 2.36443 | 0.32647978 | 0.223618252 | 0.103  |
| cg11821865 | II | 37 | 11 | 2308511                     | 0.5  | 0.00432  | 2.36443 | 0.18295685 | 0.286236903 | -0.103 |
| cg11201177 | II | 37 | 11 | 2961805                     | 0.42 | 0.02991  | 1.52413 | 0.67582715 | 0.778330322 | -0.103 |
| cg05756220 | II | 37 | 11 | 30038685 KCNA4              | 0.5  | 0.00432  | 2.36443 | 0.14427149 | 0.247221511 | -0.103 |
| cg05445008 | II | 37 | 11 | 64811819 SAC3D1             | 0.58 | 0.00041  | 3.39184 | 0.71584503 | 0.819272832 | -0.103 |
| cg20887442 | I  | 37 | 11 | 71725424 NUMA1              | 0.58 | 0.00041  | 3.39184 | 0.83894212 | 0.942381295 | -0.103 |
| cg13641591 | II | 37 | 11 | 75528534 UVRAG              | 0.58 | 0.00041  | 3.39184 | 0.71663669 | 0.613213536 | 0.103  |
| cg10880163 | II | 37 | 11 | 116455589                   | 0.62 | 0.0001   | 3.98291 | 0.47606023 | 0.373414225 | 0.103  |
| cg06114171 | II | 37 | 11 | 117561139 DSCAML1           | 0.54 | 0.0014   | 2.85345 | 0.50080656 | 0.39796205  | 0.103  |
| cg20483374 | II | 37 | 11 | 119211646 C1QTNF5;MFRP      | 0.46 | 0.01197  | 1.92207 | 0.30543093 | 0.408628582 | -0.103 |
| cg23079808 | I  | 37 | 12 | 6493003 LTBR                | 0.46 | 0.01197  | 1.92207 | 0.12989383 | 0.233148273 | -0.103 |
| cg14199423 | II | 37 | 12 | 6721892                     | 0.5  | 0.00432  | 2.36443 | 0.25646066 | 0.153323836 | 0.103  |
| cg12580783 | II | 37 | 12 | 49362475 WNT10B             | 0.54 | 0.0014   | 2.85345 | 0.73308038 | 0.630508977 | 0.103  |
| cg14242936 | II | 37 | 12 | 52404134 GRASP              | 0.58 | 0.00041  | 3.39184 | 0.36742904 | 0.470630002 | -0.103 |
| cg06015525 | I  | 37 | 12 | 57872123 ARHGAP9;ARHGAP!    | 0.58 | 0.00041  | 3.39184 | 0.39283191 | 0.290163861 | 0.103  |
| cg25027799 | II | 37 | 12 | 104659306 TXNRD1            | 0.79 | 1.06E-07 | 6.97389 | 0.66969743 | 0.772318065 | -0.103 |
| cg13150925 | II | 37 | 12 | 124529439                   | 0.58 | 0.00041  | 3.39184 | 0.72518873 | 0.828423138 | -0.103 |
| cg07241090 | II | 37 | 12 | 124864594 NCOR2;NCOR2       | 0.54 | 0.0014   | 2.85345 | 0.32057609 | 0.423938116 | -0.103 |
| cg17387577 | II | 37 | 12 | 124864657 NCOR2;NCOR2       | 0.46 | 0.01197  | 1.92207 | 0.22492823 | 0.328298425 | -0.103 |
| cg21558509 | I  | 37 | 12 | 125299800 SCARB1;SCARB1     | 0.58 | 0.00041  | 3.39184 | 0.82537675 | 0.928009015 | -0.103 |

|            |    |    |    |                           |      |         |         |            |             |        |
|------------|----|----|----|---------------------------|------|---------|---------|------------|-------------|--------|
| cg21703988 | II | 37 | 12 | 132549404 EP400           | 0.46 | 0.01197 | 1.92207 | 0.51439861 | 0.411652347 | 0.103  |
| cg00760872 | II | 37 | 13 | 33514837                  | 0.5  | 0.00432 | 2.36443 | 0.18410547 | 0.287313477 | -0.103 |
| cg08218799 | II | 37 | 14 | 24804930 ADCY4            | 0.58 | 0.00041 | 3.39184 | 0.56105874 | 0.664177822 | -0.103 |
| cg15456082 | II | 37 | 14 | 59444979                  | 0.54 | 0.0014  | 2.85345 | 0.85681407 | 0.753924179 | 0.103  |
| cg08015762 | II | 37 | 14 | 100014785 CCDC85C         | 0.54 | 0.0014  | 2.85345 | 0.83282167 | 0.729771558 | 0.103  |
| cg26312888 | II | 37 | 14 | 101875604                 | 0.42 | 0.02991 | 1.52413 | 0.69053552 | 0.587758832 | 0.103  |
| cg10669129 | II | 37 | 15 | 25444152 SNORD115-16      | 0.58 | 0.00041 | 3.39184 | 0.79607975 | 0.693048757 | 0.103  |
| cg16729415 | I  | 37 | 15 | 35047203 GJD2             | 0.5  | 0.00432 | 2.36443 | 0.01684142 | 0.119604017 | -0.103 |
| cg25687358 | I  | 37 | 15 | 45409942 DUOXA1;DUOXA2    | 0.5  | 0.00432 | 2.36443 | 0.15833577 | 0.261216822 | -0.103 |
| cg06836102 | II | 37 | 15 | 70744534                  | 0.5  | 0.00432 | 2.36443 | 0.73272322 | 0.629607675 | 0.103  |
| cg05975881 | II | 37 | 16 | 3148982                   | 0.62 | 0.0001  | 3.98291 | 0.54016938 | 0.642886242 | -0.103 |
| cg03014241 | II | 37 | 16 | 11348611 SOCS1            | 0.5  | 0.00432 | 2.36443 | 0.66618366 | 0.563624    | 0.103  |
| cg27040709 | II | 37 | 16 | 19191723 SYT17            | 0.5  | 0.00432 | 2.36443 | 0.68480899 | 0.581418879 | 0.103  |
| cg23580000 | II | 37 | 16 | 50322156 ADCY7            | 0.5  | 0.00432 | 2.36443 | 0.67594062 | 0.778586557 | -0.103 |
| cg11323198 | II | 37 | 16 | 62069806 CDH8             | 0.5  | 0.00432 | 2.36443 | 0.13052249 | 0.233522285 | -0.103 |
| cg09276655 | II | 37 | 16 | 87735689 LOC100129637     | 0.42 | 0.02991 | 1.52413 | 0.6462854  | 0.543058218 | 0.103  |
| cg07027457 | I  | 37 | 16 | 89025522 CBFA2T3          | 0.62 | 0.0001  | 3.98291 | 0.82649387 | 0.92986704  | -0.103 |
| cg02948862 | I  | 37 | 16 | 89035532 CBFA2T3          | 0.46 | 0.01197 | 1.92207 | 0.75109411 | 0.64803998  | 0.103  |
| cg07835443 | II | 37 | 16 | 89734986 C16orf55         | 0.58 | 0.00041 | 3.39184 | 0.24372867 | 0.347159426 | -0.103 |
| cg10241823 | II | 37 | 17 | 841205 NXN                | 0.46 | 0.01197 | 1.92207 | 0.54566845 | 0.648372516 | -0.103 |
| cg18278729 | II | 37 | 17 | 1657676 SERPINF2;SERPINF2 | 0.62 | 0.0001  | 3.98291 | 0.37311265 | 0.475638777 | -0.103 |
| cg03161309 | II | 37 | 17 | 6563585                   | 0.58 | 0.00041 | 3.39184 | 0.33179314 | 0.434697322 | -0.103 |
| cg01323777 | I  | 37 | 17 | 7832943 KCNAB3            | 0.5  | 0.00432 | 2.36443 | 0.87985868 | 0.776369416 | 0.103  |
| cg04460364 | II | 37 | 17 | 8370017 NDEL1;NDEL1       | 0.46 | 0.01197 | 1.92207 | 0.75456682 | 0.857544249 | -0.103 |
| cg22360318 | II | 37 | 17 | 10030599 GAS7             | 0.58 | 0.00041 | 3.39184 | 0.16294448 | 0.265872767 | -0.103 |
| cg20089715 | II | 37 | 17 | 37354769 CACNB1;CACNB1;C  | 0.54 | 0.0014  | 2.85345 | 0.74544195 | 0.848153594 | -0.103 |
| cg22303227 | II | 37 | 17 | 41018992 LOC90586         | 0.5  | 0.00432 | 2.36443 | 0.73313932 | 0.630468742 | 0.103  |
| cg05502349 | II | 37 | 17 | 41969698 MPP2             | 0.5  | 0.00432 | 2.36443 | 0.80329312 | 0.700347962 | 0.103  |
| cg27410679 | II | 37 | 17 | 43866278 CRHR1;CRHR1;CRH  | 0.54 | 0.0014  | 2.85345 | 0.67778971 | 0.575241758 | 0.103  |
| cg11971423 | II | 37 | 17 | 46653711 HOXB4            | 0.54 | 0.0014  | 2.85345 | 0.70225299 | 0.805432293 | -0.103 |
| cg20590797 | II | 37 | 17 | 48253122 SGCA;SGCA        | 0.46 | 0.01197 | 1.92207 | 0.78995286 | 0.687156774 | 0.103  |
| cg17319889 | II | 37 | 17 | 48683678 CACNA1G;CACNA1G  | 0.42 | 0.02991 | 1.52413 | 0.68090277 | 0.577490465 | 0.103  |
| cg11061343 | II | 37 | 17 | 73993843 C17orf106        | 0.5  | 0.00432 | 2.36443 | 0.27561656 | 0.378373592 | -0.103 |

|            |    |    |    |                            |      |          |         |            |             |        |
|------------|----|----|----|----------------------------|------|----------|---------|------------|-------------|--------|
| cg05414903 | II | 37 | 17 | 76573574 DNAH17            | 0.42 | 0.02991  | 1.52413 | 0.40307707 | 0.299915158 | 0.103  |
| cg05668703 | II | 37 | 17 | 79380493 BAHCC1            | 0.42 | 0.02991  | 1.52413 | 0.49372065 | 0.596911518 | -0.103 |
| cg08574915 | I  | 37 | 17 | 79924772                   | 0.46 | 0.01197  | 1.92207 | 0.12459726 | 0.22745081  | -0.103 |
| cg10460657 | II | 37 | 17 | 80560479 FOXK2             | 0.42 | 0.02991  | 1.52413 | 0.576512   | 0.679587402 | -0.103 |
| cg16071091 | II | 37 | 18 | 77196147 NFATC1;NFATC1;NF  | 0.58 | 0.00041  | 3.39184 | 0.69805704 | 0.59471192  | 0.103  |
| cg19774868 | I  | 37 | 18 | 77905408 LOC100130522;LOC  | 0.54 | 0.0014   | 2.85345 | 0.33811831 | 0.23521037  | 0.103  |
| cg12170787 | I  | 37 | 19 | 1130965 SBNO2;SBNO2        | 0.58 | 0.00041  | 3.39184 | 0.578172   | 0.475449619 | 0.103  |
| cg12277416 | II | 37 | 19 | 2859153                    | 0.54 | 0.0014   | 2.85345 | 0.64778498 | 0.750615647 | -0.103 |
| cg05350224 | II | 37 | 19 | 3053510 AES;AES;AES        | 0.5  | 0.00432  | 2.36443 | 0.57077263 | 0.467563704 | 0.103  |
| cg14817241 | II | 37 | 19 | 4851575 PLIN3;PLIN3;PLIN3  | 0.42 | 0.02991  | 1.52413 | 0.62501016 | 0.521914904 | 0.103  |
| cg24041556 | II | 37 | 19 | 10736059 SLC44A2;SLC44A2   | 0.42 | 0.02991  | 1.52413 | 0.58565432 | 0.688715946 | -0.103 |
| cg12928578 | II | 37 | 19 | 14890004 EMR2;EMR2;EMR2;   | 0.5  | 0.00432  | 2.36443 | 0.68793062 | 0.790942017 | -0.103 |
| cg23331421 | I  | 37 | 19 | 30866202 ZNF536            | 0.5  | 0.00432  | 2.36443 | 0.08416263 | 0.187568641 | -0.103 |
| cg15430294 | II | 37 | 19 | 47125648 PTGIR             | 0.62 | 0.0001   | 3.98291 | 0.57941916 | 0.682761927 | -0.103 |
| cg00565090 | II | 37 | 19 | 48258258 SNORD23;GLTSCR2   | 0.58 | 0.00041  | 3.39184 | 0.49821954 | 0.601150389 | -0.103 |
| cg27427054 | II | 37 | 19 | 55859154 SUV420H2          | 0.5  | 0.00432  | 2.36443 | 0.71493611 | 0.611493255 | 0.103  |
| cg08146323 | II | 37 | 19 | 57183118 ZNF835            | 0.58 | 0.00041  | 3.39184 | 0.11757351 | 0.220566724 | -0.103 |
| cg12493107 | II | 37 | 20 | 23344079 GZF1              | 0.42 | 0.02991  | 1.52413 | 0.71584189 | 0.613064031 | 0.103  |
| cg06913219 | II | 37 | 20 | 25433878 NINL              | 0.54 | 0.0014   | 2.85345 | 0.67530757 | 0.777954241 | -0.103 |
| cg26553763 | II | 37 | 20 | 31352874 DNMT3B;DNMT3B;    | 0.5  | 0.00432  | 2.36443 | 0.42067786 | 0.523889917 | -0.103 |
| cg13279055 | II | 37 | 21 | 33789312 C21orf63          | 0.42 | 0.02991  | 1.52413 | 0.76629281 | 0.66311109  | 0.103  |
| cg26646427 | II | 37 | 22 | 46770870 CELSR1            | 0.42 | 0.02991  | 1.52413 | 0.46944251 | 0.572930682 | -0.103 |
| cg18399427 | II | 37 | 22 | 50724844 PLXNB2            | 0.5  | 0.00432  | 2.36443 | 0.76194289 | 0.658549907 | 0.103  |
| cg09864227 | I  | 37 | 1  | 1008207                    | 0.58 | 0.00041  | 3.39184 | 0.82669711 | 0.724967037 | 0.102  |
| cg10888031 | I  | 37 | 1  | 2938799 ACTRT2             | 0.54 | 0.0014   | 2.85345 | 0.88900664 | 0.786744229 | 0.102  |
| cg08732466 | II | 37 | 1  | 2982592 FLJ42875;FLJ42875  | 0.5  | 0.00432  | 2.36443 | 0.76852409 | 0.666273746 | 0.102  |
| cg14018153 | I  | 37 | 1  | 3098864 PRDM16;PRDM16      | 0.42 | 0.02991  | 1.52413 | 0.17376014 | 0.275613565 | -0.102 |
| cg02954884 | II | 37 | 1  | 6638504 TAS1R1;TAS1R1;TA   | 0.5  | 0.00432  | 2.36443 | 0.53309556 | 0.431235695 | 0.102  |
| cg06640822 | II | 37 | 1  | 25291472 RUNX3;RUNX3       | 0.67 | 2.34E-05 | 4.63072 | 0.58816937 | 0.486475743 | 0.102  |
| cg22429121 | II | 37 | 1  | 27901805 AHDC1             | 0.46 | 0.01197  | 1.92207 | 0.36129075 | 0.463627173 | -0.102 |
| cg04219099 | II | 37 | 1  | 38261052 MANEAL;MANEAL;I   | 0.5  | 0.00432  | 2.36443 | 0.3734773  | 0.475316448 | -0.102 |
| cg11958827 | II | 37 | 1  | 44252126 ST3GAL3;ST3GAL3;! | 0.54 | 0.0014   | 2.85345 | 0.80097288 | 0.903050892 | -0.102 |
| cg18231025 | II | 37 | 1  | 59573471                   | 0.46 | 0.01197  | 1.92207 | 0.77203231 | 0.873842472 | -0.102 |

|            |    |    |   |                           |      |         |         |            |             |        |
|------------|----|----|---|---------------------------|------|---------|---------|------------|-------------|--------|
| cg07558455 | II | 37 | 1 | 62784762 KANK4            | 0.54 | 0.0014  | 2.85345 | 0.07925889 | 0.181648266 | -0.102 |
| cg22040158 | II | 37 | 1 | 112527540 KCND3;KCND3     | 0.58 | 0.00041 | 3.39184 | 0.55966429 | 0.45792721  | 0.102  |
| cg09996284 | II | 37 | 1 | 156211851 BGLAP           | 0.46 | 0.01197 | 1.92207 | 0.24482348 | 0.346537085 | -0.102 |
| cg12662929 | II | 37 | 1 | 160368823                 | 0.5  | 0.00432 | 2.36443 | 0.68663144 | 0.788464416 | -0.102 |
| cg09671955 | II | 37 | 1 | 169429972                 | 0.5  | 0.00432 | 2.36443 | 0.45826441 | 0.560699539 | -0.102 |
| cg05378938 | I  | 37 | 1 | 179560983 TDRD5           | 0.54 | 0.0014  | 2.85345 | 0.15175754 | 0.254099143 | -0.102 |
| cg01040850 | II | 37 | 1 | 181002669 MR1             | 0.54 | 0.0014  | 2.85345 | 0.82410546 | 0.722138105 | 0.102  |
| cg06621080 | II | 37 | 1 | 201631166 NAV1            | 0.42 | 0.02991 | 1.52413 | 0.62970962 | 0.528135138 | 0.102  |
| cg00964446 | II | 37 | 1 | 203023637 PPFAA4          | 0.5  | 0.00432 | 2.36443 | 0.77890573 | 0.677383428 | 0.102  |
| cg03583857 | II | 37 | 1 | 208085022 CD34;CD34       | 0.46 | 0.01197 | 1.92207 | 0.29275599 | 0.39467727  | -0.102 |
| cg21934230 | II | 37 | 1 | 228202608 WNT3A           | 0.58 | 0.00041 | 3.39184 | 0.52250087 | 0.624703391 | -0.102 |
| cg09327855 | II | 37 | 1 | 236156587 NID1            | 0.42 | 0.02991 | 1.52413 | 0.68881163 | 0.587217368 | 0.102  |
| cg00804354 | II | 37 | 1 | 249111407 SH3BP5L         | 0.42 | 0.02991 | 1.52413 | 0.2007246  | 0.303199998 | -0.102 |
| cg21047367 | II | 37 | 2 | 11732905 GREB1            | 0.42 | 0.02991 | 1.52413 | 0.73672009 | 0.838679842 | -0.102 |
| cg00270460 | II | 37 | 2 | 97509353 ANKRD23          | 0.54 | 0.0014  | 2.85345 | 0.56317574 | 0.665659903 | -0.102 |
| cg01114124 | I  | 37 | 2 | 240171748 HDAC4           | 0.54 | 0.0014  | 2.85345 | 0.84233813 | 0.944346141 | -0.102 |
| cg26058474 | I  | 37 | 2 | 241975035 SNED1           | 0.5  | 0.00432 | 2.36443 | 0.88310595 | 0.781053451 | 0.102  |
| cg23733502 | I  | 37 | 3 | 577629                    | 0.5  | 0.00432 | 2.36443 | 0.71842239 | 0.820364496 | -0.102 |
| cg00472373 | II | 37 | 3 | 9833414 ARPC4;TADA3;ARPC  | 0.46 | 0.01197 | 1.92207 | 0.76611351 | 0.663774669 | 0.102  |
| cg00625351 | II | 37 | 3 | 34048130                  | 0.5  | 0.00432 | 2.36443 | 0.79802423 | 0.696262947 | 0.102  |
| cg16947394 | II | 37 | 3 | 52930628 TMEM110          | 0.46 | 0.01197 | 1.92207 | 0.3275672  | 0.429887546 | -0.102 |
| cg07791011 | II | 37 | 3 | 62363922                  | 0.58 | 0.00041 | 3.39184 | 0.33066754 | 0.432192398 | -0.102 |
| cg04816013 | II | 37 | 3 | 123987591 KALRN;KALRN     | 0.5  | 0.00432 | 2.36443 | 0.67694739 | 0.575015663 | 0.102  |
| cg16510460 | II | 37 | 3 | 184434972                 | 0.5  | 0.00432 | 2.36443 | 0.74152702 | 0.8430636   | -0.102 |
| cg14626309 | II | 37 | 4 | 299051                    | 0.54 | 0.0014  | 2.85345 | 0.24816626 | 0.350291617 | -0.102 |
| cg27149937 | II | 37 | 4 | 640594 PDE6B;PDE6B        | 0.62 | 0.0001  | 3.98291 | 0.5237197  | 0.625625945 | -0.102 |
| cg11411884 | I  | 37 | 4 | 1016333 FGFRL1;FGFRL1;FGI | 0.42 | 0.02991 | 1.52413 | 0.83961324 | 0.737460114 | 0.102  |
| cg08320703 | II | 37 | 4 | 2792582                   | 0.5  | 0.00432 | 2.36443 | 0.53209795 | 0.63443917  | -0.102 |
| cg18912103 | I  | 37 | 4 | 2944692 C4orf10;NOP14     | 0.46 | 0.01197 | 1.92207 | 0.60099872 | 0.703384896 | -0.102 |
| cg18630748 | I  | 37 | 4 | 3387499 RGS12;RGS12;RGS1  | 0.5  | 0.00432 | 2.36443 | 0.73141657 | 0.833035808 | -0.102 |
| cg03835987 | II | 37 | 4 | 111120249 ELOVL6;ELOVL6   | 0.54 | 0.0014  | 2.85345 | 0.09163018 | 0.193972047 | -0.102 |
| cg19052164 | II | 37 | 5 | 80900                     | 0.5  | 0.00432 | 2.36443 | 0.67172069 | 0.569867509 | 0.102  |
| cg21946374 | II | 37 | 5 | 1108401 SLC12A7           | 0.5  | 0.00432 | 2.36443 | 0.29881584 | 0.40105168  | -0.102 |

|            |    |    |    |           |                      |      |          |         |            |             |        |
|------------|----|----|----|-----------|----------------------|------|----------|---------|------------|-------------|--------|
| cg27346707 | II | 37 | 5  | 126626348 | MEGF10               | 0.54 | 0.0014   | 2.85345 | 0.16919442 | 0.271077194 | -0.102 |
| cg16247269 | II | 37 | 5  | 148513941 |                      | 0.54 | 0.0014   | 2.85345 | 0.63528902 | 0.533259118 | 0.102  |
| cg09813400 | II | 37 | 5  | 150431636 | TNIP1                | 0.54 | 0.0014   | 2.85345 | 0.55516054 | 0.65720313  | -0.102 |
| cg07802909 | II | 37 | 5  | 169817797 | KCNMB1;KCNIP1        | 0.46 | 0.01197  | 1.92207 | 0.85852356 | 0.756833264 | 0.102  |
| cg14830791 | II | 37 | 6  | 1407935   |                      | 0.46 | 0.01197  | 1.92207 | 0.4010239  | 0.503208128 | -0.102 |
| cg00184953 | II | 37 | 6  | 31146222  | PSORS1C3             | 0.46 | 0.01197  | 1.92207 | 0.81015926 | 0.708413041 | 0.102  |
| cg22306579 | I  | 37 | 6  | 31869057  | ZBTB12               | 0.54 | 0.0014   | 2.85345 | 0.79161127 | 0.893585844 | -0.102 |
| cg16437896 | I  | 37 | 6  | 32098346  | FKBPL                | 0.54 | 0.0014   | 2.85345 | 0.36949414 | 0.267087376 | 0.102  |
| cg03037684 | II | 37 | 6  | 152421333 | ESR1;ESR1;ESR1;ESR1  | 0.46 | 0.01197  | 1.92207 | 0.52757547 | 0.629917827 | -0.102 |
| cg18698681 | II | 37 | 6  | 170571686 | LOC154449            | 0.46 | 0.01197  | 1.92207 | 0.33704506 | 0.439450689 | -0.102 |
| cg01727625 | II | 37 | 7  | 35373     |                      | 0.42 | 0.02991  | 1.52413 | 0.49448852 | 0.596366449 | -0.102 |
| cg16770054 | II | 37 | 7  | 1955738   | MAD1L1;MAD1L1;MAD1L1 | 0.46 | 0.01197  | 1.92207 | 0.76110658 | 0.863390737 | -0.102 |
| cg15997393 | I  | 37 | 7  | 1961869   | MAD1L1;MAD1L1;MAD1L1 | 0.46 | 0.01197  | 1.92207 | 0.87538992 | 0.773678812 | 0.102  |
| cg17890233 | II | 37 | 7  | 6465684   | DAGLB;DAGLB          | 0.62 | 0.0001   | 3.98291 | 0.79416258 | 0.895857356 | -0.102 |
| cg06114556 | II | 37 | 7  | 47541543  | TNS3                 | 0.67 | 2.34E-05 | 4.63072 | 0.5455019  | 0.647146603 | -0.102 |
| cg06809544 | II | 37 | 7  | 79081666  | MAGI2                | 0.5  | 0.00432  | 2.36443 | 0.19852562 | 0.300534532 | -0.102 |
| cg24531955 | II | 37 | 8  | 23154691  | LOXL2                | 0.62 | 0.0001   | 3.98291 | 0.19260001 | 0.294569218 | -0.102 |
| cg13620439 | II | 37 | 8  | 27462513  | CLU;CLU;CLU          | 0.42 | 0.02991  | 1.52413 | 0.8302912  | 0.728701506 | 0.102  |
| cg04127342 | II | 37 | 8  | 57358130  | PENK;PENK            | 0.58 | 0.00041  | 3.39184 | 0.15969885 | 0.261546654 | -0.102 |
| cg03335386 | II | 37 | 8  | 134469021 | ST3GAL1;ST3GAL1      | 0.5  | 0.00432  | 2.36443 | 0.38058283 | 0.483050029 | -0.102 |
| cg08418332 | II | 37 | 9  | 34691001  | CCL19                | 0.54 | 0.0014   | 2.85345 | 0.52294341 | 0.625157137 | -0.102 |
| cg13010497 | II | 37 | 9  | 38526947  |                      | 0.46 | 0.01197  | 1.92207 | 0.62489384 | 0.726774958 | -0.102 |
| cg14113203 | II | 37 | 9  | 97346942  | FBP2                 | 0.58 | 0.00041  | 3.39184 | 0.79169704 | 0.689839741 | 0.102  |
| cg14491667 | II | 37 | 9  | 100267701 | TMOD1;TMOD1          | 0.5  | 0.00432  | 2.36443 | 0.81007857 | 0.707654682 | 0.102  |
| cg00664581 | II | 37 | 9  | 115707717 |                      | 0.54 | 0.0014   | 2.85345 | 0.66687601 | 0.564834086 | 0.102  |
| cg14326196 | I  | 37 | 9  | 116860650 | KIF12                | 0.46 | 0.01197  | 1.92207 | 0.14315973 | 0.244870546 | -0.102 |
| cg25884399 | II | 37 | 9  | 139237461 | GPSM1                | 0.42 | 0.02991  | 1.52413 | 0.23728518 | 0.338907324 | -0.102 |
| cg00407944 | II | 37 | 9  | 139424152 | NOTCH1               | 0.46 | 0.01197  | 1.92207 | 0.21988715 | 0.321476099 | -0.102 |
| cg06223120 | II | 37 | 9  | 140022932 |                      | 0.62 | 0.0001   | 3.98291 | 0.41310767 | 0.311309159 | 0.102  |
| cg14568830 | I  | 37 | 10 | 23463243  |                      | 0.5  | 0.00432  | 2.36443 | 0.10003857 | 0.201846921 | -0.102 |
| cg14961117 | II | 37 | 10 | 71632008  | COL13A1;COL13A1;     | 0.5  | 0.00432  | 2.36443 | 0.79050673 | 0.688450273 | 0.102  |
| cg13836550 | II | 37 | 10 | 118084504 | C10orf96             | 0.46 | 0.01197  | 1.92207 | 0.52308355 | 0.624957293 | -0.102 |
| cg00244001 | II | 37 | 10 | 126336805 | FAM53B               | 0.5  | 0.00432  | 2.36443 | 0.21315584 | 0.31552556  | -0.102 |

|            |    |    |    |                           |      |          |         |            |             |        |
|------------|----|----|----|---------------------------|------|----------|---------|------------|-------------|--------|
| cg08380478 | I  | 37 | 10 | 132683454                 | 0.46 | 0.01197  | 1.92207 | 0.65150473 | 0.549549825 | 0.102  |
| cg06376402 | II | 37 | 10 | 134404945 INPP5A          | 0.58 | 0.00041  | 3.39184 | 0.74141128 | 0.843822732 | -0.102 |
| cg25843174 | II | 37 | 11 | 12811716 TEAD1            | 0.46 | 0.01197  | 1.92207 | 0.63784716 | 0.535798345 | 0.102  |
| cg23646614 | II | 37 | 11 | 48083100 PTPRJ;PTPRJ      | 0.54 | 0.0014   | 2.85345 | 0.19914166 | 0.301114597 | -0.102 |
| cg23208430 | II | 37 | 11 | 60483174 MS4A8B           | 0.46 | 0.01197  | 1.92207 | 0.74536714 | 0.643844258 | 0.102  |
| cg23907108 | II | 37 | 11 | 64405993 NRXN2;NRXN2;NRX  | 0.42 | 0.02991  | 1.52413 | 0.40597398 | 0.303507648 | 0.102  |
| cg24423806 | II | 37 | 11 | 66310467 ZDHHC24          | 0.58 | 0.00041  | 3.39184 | 0.74304392 | 0.845104337 | -0.102 |
| cg11921958 | II | 37 | 11 | 67068769 ANKRD13D;ANKRD   | 0.46 | 0.01197  | 1.92207 | 0.57933594 | 0.680862682 | -0.102 |
| cg09545730 | I  | 37 | 11 | 67071885 SSH3             | 0.46 | 0.01197  | 1.92207 | 0.62752936 | 0.729827119 | -0.102 |
| cg18160691 | II | 37 | 11 | 68081686 LRP5             | 0.67 | 2.34E-05 | 4.63072 | 0.2485405  | 0.351006677 | -0.102 |
| cg25101936 | II | 37 | 11 | 113929164 ZBTB16          | 0.62 | 0.0001   | 3.98291 | 0.6356912  | 0.738075185 | -0.102 |
| cg24621362 | II | 37 | 12 | 6492890 LTBR              | 0.67 | 2.34E-05 | 4.63072 | 0.12597237 | 0.228388116 | -0.102 |
| cg17718377 | II | 37 | 12 | 113495619 DTX1            | 0.5  | 0.00432  | 2.36443 | 0.57179305 | 0.469415891 | 0.102  |
| cg17002771 | I  | 37 | 13 | 19174841                  | 0.5  | 0.00432  | 2.36443 | 0.50934991 | 0.40704823  | 0.102  |
| cg17241776 | I  | 37 | 13 | 51417469 DLEU7            | 0.46 | 0.01197  | 1.92207 | 0.07963179 | 0.181909873 | -0.102 |
| cg16404157 | II | 37 | 14 | 38724648 CLEC14A          | 0.42 | 0.02991  | 1.52413 | 0.10208145 | 0.204543612 | -0.102 |
| cg20496061 | I  | 37 | 14 | 107210949                 | 0.75 | 7.61E-07 | 6.11857 | 0.36962508 | 0.267401236 | 0.102  |
| cg15744692 | II | 37 | 15 | 45671195 LOC145663;GATM   | 0.46 | 0.01197  | 1.92207 | 0.41374508 | 0.31169024  | 0.102  |
| cg18022554 | II | 37 | 15 | 73657801 HCN4             | 0.58 | 0.00041  | 3.39184 | 0.61655093 | 0.71818309  | -0.102 |
| cg23481246 | II | 37 | 16 | 731772 STUB1;JMJD8        | 0.54 | 0.0014   | 2.85345 | 0.36768369 | 0.469979822 | -0.102 |
| cg06263943 | II | 37 | 16 | 1202015 CACNA1H;CACNA1H   | 0.46 | 0.01197  | 1.92207 | 0.46463388 | 0.362727641 | 0.102  |
| cg07651316 | I  | 37 | 16 | 3641320 BTBD12            | 0.58 | 0.00041  | 3.39184 | 0.87001518 | 0.971635934 | -0.102 |
| cg10908196 | II | 37 | 16 | 4732911 MGRN1;MGRN1;M     | 0.62 | 0.0001   | 3.98291 | 0.67679465 | 0.779270541 | -0.102 |
| cg02525597 | II | 37 | 16 | 10976835 CIITA            | 0.5  | 0.00432  | 2.36443 | 0.8057869  | 0.704173146 | 0.102  |
| cg26651122 | II | 37 | 16 | 56641777 MT2A             | 0.5  | 0.00432  | 2.36443 | 0.36266171 | 0.464284578 | -0.102 |
| cg26734350 | I  | 37 | 16 | 57662008 GPR56;GPR56;GPR  | 0.46 | 0.01197  | 1.92207 | 0.67843068 | 0.576907154 | 0.102  |
| cg00620976 | II | 37 | 16 | 65612895                  | 0.54 | 0.0014   | 2.85345 | 0.73733369 | 0.635520484 | 0.102  |
| cg04760708 | II | 37 | 16 | 88988340 CBFA2T3;CBFA2T3  | 0.46 | 0.01197  | 1.92207 | 0.58649502 | 0.484586095 | 0.102  |
| cg06419212 | II | 37 | 16 | 89161567 ACSF3;ACSF3;ACSF | 0.42 | 0.02991  | 1.52413 | 0.87396839 | 0.771896595 | 0.102  |
| cg06934654 | I  | 37 | 16 | 89180742 ACSF3;ACSF3;ACSF | 0.42 | 0.02991  | 1.52413 | 0.65034276 | 0.548764346 | 0.102  |
| cg12655416 | II | 37 | 17 | 38077870 ORMDL3           | 0.46 | 0.01197  | 1.92207 | 0.26436152 | 0.36611405  | -0.102 |
| cg27470486 | II | 37 | 17 | 40073688 ACLY;ACLY        | 0.54 | 0.0014   | 2.85345 | 0.71334954 | 0.611781007 | 0.102  |
| cg02108135 | II | 37 | 17 | 42017758                  | 0.5  | 0.00432  | 2.36443 | 0.67006668 | 0.568144964 | 0.102  |

|            |    |    |    |           |                   |      |          |         |            |             |        |
|------------|----|----|----|-----------|-------------------|------|----------|---------|------------|-------------|--------|
| cg10575089 | II | 37 | 17 | 56606542  | SEPT4;SEPT4;SEPT4 | 0.58 | 0.00041  | 3.39184 | 0.62819722 | 0.525939946 | 0.102  |
| cg07433152 | II | 37 | 17 | 60782222  | MARCH10;MARCH1    | 0.46 | 0.01197  | 1.92207 | 0.33646502 | 0.234043854 | 0.102  |
| cg18271897 | II | 37 | 17 | 75316784  | SEPT9;SEPT9;SEPT9 | 0.46 | 0.01197  | 1.92207 | 0.40131813 | 0.502874781 | -0.102 |
| cg22563987 | I  | 37 | 17 | 76130496  | TMC8              | 0.67 | 2.34E-05 | 4.63072 | 0.13602018 | 0.033636154 | 0.102  |
| cg21357291 | II | 37 | 18 | 55471021  |                   | 0.5  | 0.00432  | 2.36443 | 0.1800771  | 0.28161277  | -0.102 |
| cg15363134 | I  | 37 | 18 | 77161214  | NFATC1;NFATC1;NF  | 0.42 | 0.02991  | 1.52413 | 0.77111431 | 0.66870951  | 0.102  |
| cg24377495 | I  | 37 | 19 | 6660075   |                   | 0.58 | 0.00041  | 3.39184 | 0.63963355 | 0.74184595  | -0.102 |
| cg05231098 | I  | 37 | 19 | 11070915  | SMARCA4;SMARCA    | 0.46 | 0.01197  | 1.92207 | 0.42761033 | 0.325940807 | 0.102  |
| cg22041417 | II | 37 | 19 | 16178195  | TPM4              | 0.42 | 0.02991  | 1.52413 | 0.63555026 | 0.737741845 | -0.102 |
| cg19462712 | I  | 37 | 19 | 34744703  | KIAA0355          | 0.5  | 0.00432  | 2.36443 | 0.79605113 | 0.69375872  | 0.102  |
| cg02768785 | II | 37 | 19 | 45912979  | CD3EAP;ERCC1;ERC  | 0.46 | 0.01197  | 1.92207 | 0.21388145 | 0.316309282 | -0.102 |
| cg11269599 | II | 37 | 19 | 52391304  | ZNF577;ZNF577;ZN  | 0.46 | 0.01197  | 1.92207 | 0.22572537 | 0.327366672 | -0.102 |
| cg11267810 | II | 37 | 20 | 19867026  |                   | 0.5  | 0.00432  | 2.36443 | 0.75518813 | 0.856890815 | -0.102 |
| cg01608731 | II | 37 | 20 | 30190720  |                   | 0.46 | 0.01197  | 1.92207 | 0.79476826 | 0.692942148 | 0.102  |
| cg14950044 | II | 37 | 20 | 49457327  | BCAS4;BCAS4;BCAS  | 0.71 | 4.57E-06 | 5.34042 | 0.46074033 | 0.563077626 | -0.102 |
| cg06356785 | II | 37 | 21 | 45844767  | TRPM2             | 0.42 | 0.02991  | 1.52413 | 0.8231353  | 0.721618324 | 0.102  |
| cg05546044 | II | 37 | 22 | 22222597  | MAPK1;MAPK1       | 0.54 | 0.0014   | 2.85345 | 0.24853294 | 0.146183519 | 0.102  |
| cg07187268 | II | 37 | 22 | 24105186  | C22orf15          | 0.54 | 0.0014   | 2.85345 | 0.47459884 | 0.57655548  | -0.102 |
| cg16166559 | II | 37 | 22 | 45072588  | PRR5;PRR5;PRR5;PI | 0.54 | 0.0014   | 2.85345 | 0.1297971  | 0.231857612 | -0.102 |
| cg06057569 | II | 37 | 22 | 50219754  | BRD1              | 0.42 | 0.02991  | 1.52413 | 0.46769429 | 0.366148956 | 0.102  |
| cg10219816 | I  | 37 | 1  | 2427655   | PLCH2             | 0.58 | 0.00041  | 3.39184 | 0.82235193 | 0.721269433 | 0.101  |
| cg16022081 | II | 37 | 1  | 2564329   | MMEL1;MMEL1       | 0.5  | 0.00432  | 2.36443 | 0.73124254 | 0.629836944 | 0.101  |
| cg20014974 | II | 37 | 1  | 8271918   |                   | 0.5  | 0.00432  | 2.36443 | 0.29333813 | 0.394329643 | -0.101 |
| cg22877366 | II | 37 | 1  | 12107668  |                   | 0.5  | 0.00432  | 2.36443 | 0.43506498 | 0.334097488 | 0.101  |
| cg14041921 | II | 37 | 1  | 15130959  | KIAA1026;KIAA1026 | 0.54 | 0.0014   | 2.85345 | 0.80227328 | 0.701626366 | 0.101  |
| cg21293216 | II | 37 | 1  | 24469768  | IL22RA1           | 0.42 | 0.02991  | 1.52413 | 0.81687581 | 0.715864025 | 0.101  |
| cg11254522 | II | 37 | 1  | 27950343  | FGR;FGR;FGR       | 0.46 | 0.01197  | 1.92207 | 0.5307474  | 0.631337115 | -0.101 |
| cg25470758 | I  | 37 | 1  | 31280143  |                   | 0.54 | 0.0014   | 2.85345 | 0.68291543 | 0.581844759 | 0.101  |
| cg22509164 | II | 37 | 1  | 46766957  | LRRC41            | 0.58 | 0.00041  | 3.39184 | 0.46845858 | 0.569370401 | -0.101 |
| cg17167852 | I  | 37 | 1  | 55505189  | PCSK9             | 0.46 | 0.01197  | 1.92207 | 0.11825667 | 0.218793412 | -0.101 |
| cg23277715 | II | 37 | 1  | 153330068 | S100A9            | 0.46 | 0.01197  | 1.92207 | 0.14200346 | 0.243001009 | -0.101 |
| cg22700686 | II | 37 | 1  | 153538764 | S100A2            | 0.42 | 0.02991  | 1.52413 | 0.14938226 | 0.250554658 | -0.101 |
| cg26230851 | II | 37 | 1  | 161231273 | PCP4L1            | 0.5  | 0.00432  | 2.36443 | 0.81003538 | 0.708785158 | 0.101  |

|            |    |    |   |           |                      |      |         |         |            |             |        |
|------------|----|----|---|-----------|----------------------|------|---------|---------|------------|-------------|--------|
| cg15492834 | II | 37 | 1 | 162351057 | C1orf226;C1orf226    | 0.5  | 0.00432 | 2.36443 | 0.84347875 | 0.742367578 | 0.101  |
| cg17756730 | II | 37 | 1 | 172608644 |                      | 0.46 | 0.01197 | 1.92207 | 0.66729261 | 0.566066695 | 0.101  |
| cg06644515 | II | 37 | 1 | 173834831 | SNORD47;GAS5;SNORD   | 0.46 | 0.01197 | 1.92207 | 0.64233387 | 0.541385291 | 0.101  |
| cg16419354 | I  | 37 | 1 | 179713349 | FAM163A              | 0.46 | 0.01197 | 1.92207 | 0.13419261 | 0.235582346 | -0.101 |
| cg22622057 | II | 37 | 1 | 182053203 |                      | 0.42 | 0.02991 | 1.52413 | 0.25113556 | 0.351644798 | -0.101 |
| cg24315209 | II | 37 | 1 | 205494299 | CDK18;CDK18;CDK18    | 0.5  | 0.00432 | 2.36443 | 0.6029419  | 0.502098209 | 0.101  |
| cg06852461 | II | 37 | 1 | 207975182 |                      | 0.42 | 0.02991 | 1.52413 | 0.17329895 | 0.274784312 | -0.101 |
| cg24371574 | II | 37 | 1 | 230428167 |                      | 0.5  | 0.00432 | 2.36443 | 0.65237712 | 0.551004565 | 0.101  |
| cg04415297 | II | 37 | 1 | 231243034 |                      | 0.42 | 0.02991 | 1.52413 | 0.71715342 | 0.615761286 | 0.101  |
| cg06523516 | I  | 37 | 2 | 794646    |                      | 0.46 | 0.01197 | 1.92207 | 0.64365482 | 0.543048314 | 0.101  |
| cg07628841 | I  | 37 | 2 | 27851430  | GPN1;CCDC121;GPN1    | 0.54 | 0.0014  | 2.85345 | 0.41741544 | 0.316203391 | 0.101  |
| cg13820899 | II | 37 | 2 | 42991343  | OXER1;OXER1          | 0.62 | 0.0001  | 3.98291 | 0.20903691 | 0.310487131 | -0.101 |
| cg06949933 | II | 37 | 2 | 61406491  | AHSA2                | 0.42 | 0.02991 | 1.52413 | 0.70518003 | 0.604168988 | 0.101  |
| cg22737154 | II | 37 | 2 | 64631614  |                      | 0.54 | 0.0014  | 2.85345 | 0.5240746  | 0.624766925 | -0.101 |
| cg01271812 | II | 37 | 2 | 66671478  | MEIS1                | 0.54 | 0.0014  | 2.85345 | 0.20632205 | 0.307182344 | -0.101 |
| cg25299364 | II | 37 | 2 | 68882144  | PROKR1               | 0.54 | 0.0014  | 2.85345 | 0.68138755 | 0.78261322  | -0.101 |
| cg06869641 | II | 37 | 2 | 71947929  |                      | 0.62 | 0.0001  | 3.98291 | 0.59451111 | 0.493829612 | 0.101  |
| cg04670857 | II | 37 | 2 | 79740208  | CTNNA2;CTNNA2;CTNNA2 | 0.42 | 0.02991 | 1.52413 | 0.15483106 | 0.255529677 | -0.101 |
| cg13176012 | II | 37 | 2 | 157176971 |                      | 0.46 | 0.01197 | 1.92207 | 0.20470572 | 0.30600644  | -0.101 |
| cg02915785 | II | 37 | 2 | 219233544 |                      | 0.46 | 0.01197 | 1.92207 | 0.32843855 | 0.429196672 | -0.101 |
| cg16360836 | II | 37 | 2 | 240207606 | HDAC4                | 0.42 | 0.02991 | 1.52413 | 0.36743779 | 0.468315289 | -0.101 |
| cg08440077 | II | 37 | 2 | 241854588 |                      | 0.58 | 0.00041 | 3.39184 | 0.71931431 | 0.618198914 | 0.101  |
| cg13339454 | II | 37 | 2 | 242127690 | ANO7;ANO7            | 0.42 | 0.02991 | 1.52413 | 0.79896104 | 0.69759221  | 0.101  |
| cg02914097 | II | 37 | 3 | 31118948  |                      | 0.46 | 0.01197 | 1.92207 | 0.47253952 | 0.573254876 | -0.101 |
| cg24436196 | II | 37 | 3 | 56448270  | ERC2                 | 0.42 | 0.02991 | 1.52413 | 0.65908631 | 0.557816139 | 0.101  |
| cg04481170 | II | 37 | 3 | 158445995 | RARRES1;RARRES1      | 0.42 | 0.02991 | 1.52413 | 0.42282469 | 0.524128969 | -0.101 |
| cg17574471 | I  | 37 | 4 | 1834678   | LETM1                | 0.5  | 0.00432 | 2.36443 | 0.8300252  | 0.72910023  | 0.101  |
| cg22077313 | II | 37 | 4 | 6691093   |                      | 0.42 | 0.02991 | 1.52413 | 0.4739811  | 0.575450763 | -0.101 |
| cg11624060 | II | 37 | 5 | 1316038   |                      | 0.58 | 0.00041 | 3.39184 | 0.17861855 | 0.077242314 | 0.101  |
| cg26468696 | II | 37 | 5 | 141331010 | PCDH12               | 0.42 | 0.02991 | 1.52413 | 0.47929446 | 0.378129303 | 0.101  |
| cg04709822 | I  | 37 | 5 | 149823868 | RPS14;RPS14;RPS14    | 0.42 | 0.02991 | 1.52413 | 0.61447404 | 0.71569583  | -0.101 |
| cg10981651 | I  | 37 | 5 | 153853545 |                      | 0.42 | 0.02991 | 1.52413 | 0.14322329 | 0.244377743 | -0.101 |
| cg19537558 | II | 37 | 5 | 167550996 | ODZ2                 | 0.58 | 0.00041 | 3.39184 | 0.88617428 | 0.785524399 | 0.101  |

|            |    |    |    |           |                    |      |          |         |            |             |        |
|------------|----|----|----|-----------|--------------------|------|----------|---------|------------|-------------|--------|
| cg20952257 | II | 37 | 5  | 171074407 |                    | 0.5  | 0.00432  | 2.36443 | 0.3772415  | 0.478293563 | -0.101 |
| cg08815340 | II | 37 | 6  | 5026435   |                    | 0.5  | 0.00432  | 2.36443 | 0.15449096 | 0.255015991 | -0.101 |
| cg21644740 | I  | 37 | 6  | 29599248  | GABBR1;GABBR1      | 0.46 | 0.01197  | 1.92207 | 0.58588499 | 0.686792624 | -0.101 |
| cg02188225 | I  | 37 | 6  | 30459255  | HLA-E              | 0.46 | 0.01197  | 1.92207 | 0.7478678  | 0.646371709 | 0.101  |
| cg19215110 | II | 37 | 6  | 30850913  | DDR1;DDR1          | 0.42 | 0.02991  | 1.52413 | 0.76016105 | 0.659482313 | 0.101  |
| cg27198497 | I  | 37 | 6  | 33870701  |                    | 0.58 | 0.00041  | 3.39184 | 0.79194253 | 0.892789638 | -0.101 |
| cg07699454 | II | 37 | 6  | 39274353  | KCNK17;KCNK17      | 0.5  | 0.00432  | 2.36443 | 0.67650298 | 0.575898246 | 0.101  |
| cg16540391 | II | 37 | 6  | 151042035 | PLEKHG1            | 0.42 | 0.02991  | 1.52413 | 0.18311872 | 0.08186647  | 0.101  |
| cg12816748 | II | 37 | 7  | 752743    | PRKAR1B;PRKAR1B    | 0.58 | 0.00041  | 3.39184 | 0.22138974 | 0.322738488 | -0.101 |
| cg05861879 | II | 37 | 7  | 2284723   | NUDT1;NUDT1;NUI    | 0.5  | 0.00432  | 2.36443 | 0.51936406 | 0.418547821 | 0.101  |
| cg01492538 | II | 37 | 7  | 2774543   | GNA12              | 0.5  | 0.00432  | 2.36443 | 0.22757084 | 0.32809749  | -0.101 |
| cg18833928 | II | 37 | 7  | 38357684  |                    | 0.46 | 0.01197  | 1.92207 | 0.67852059 | 0.77981773  | -0.101 |
| cg19465268 | I  | 37 | 7  | 75517941  | RHBDD2;RHBDD2      | 0.58 | 0.00041  | 3.39184 | 0.80902552 | 0.910137688 | -0.101 |
| cg11202871 | II | 37 | 7  | 134851177 | C7orf49;C7orf49;C7 | 0.54 | 0.0014   | 2.85345 | 0.58460346 | 0.685937258 | -0.101 |
| cg23896514 | II | 37 | 7  | 150103902 | LOC728743          | 0.54 | 0.0014   | 2.85345 | 0.1572383  | 0.056574229 | 0.101  |
| cg24842334 | II | 37 | 7  | 157647224 | PTPRN2;PTPRN2;PT   | 0.54 | 0.0014   | 2.85345 | 0.22306822 | 0.323843119 | -0.101 |
| cg11548083 | II | 37 | 8  | 10208156  | MSRA;MSRA;MSRA     | 0.5  | 0.00432  | 2.36443 | 0.46195716 | 0.562707512 | -0.101 |
| cg24387126 | II | 37 | 8  | 11617293  | GATA4              | 0.46 | 0.01197  | 1.92207 | 0.48962057 | 0.591077278 | -0.101 |
| cg12271419 | II | 37 | 8  | 22855616  | RHOBTB2;RHOBTB2    | 0.42 | 0.02991  | 1.52413 | 0.43574317 | 0.33435455  | 0.101  |
| cg25922329 | II | 37 | 8  | 128911766 | PVT1               | 0.54 | 0.0014   | 2.85345 | 0.65731277 | 0.75846993  | -0.101 |
| cg11547696 | II | 37 | 8  | 142288508 |                    | 0.5  | 0.00432  | 2.36443 | 0.49895774 | 0.600286365 | -0.101 |
| cg20100987 | II | 37 | 8  | 143868262 | LY6D               | 0.54 | 0.0014   | 2.85345 | 0.4249512  | 0.525712692 | -0.101 |
| cg10061906 | I  | 37 | 8  | 146013430 | ZNF34              | 0.42 | 0.02991  | 1.52413 | 0.75687638 | 0.655975111 | 0.101  |
| cg17558772 | II | 37 | 10 | 1406218   | ADARB2             | 0.54 | 0.0014   | 2.85345 | 0.57501341 | 0.676366065 | -0.101 |
| cg18264092 | II | 37 | 10 | 6183575   |                    | 0.46 | 0.01197  | 1.92207 | 0.79871914 | 0.697456185 | 0.101  |
| cg09389824 | II | 37 | 10 | 31883099  |                    | 0.5  | 0.00432  | 2.36443 | 0.78928773 | 0.688178225 | 0.101  |
| cg08514530 | II | 37 | 10 | 44163270  |                    | 0.42 | 0.02991  | 1.52413 | 0.50341583 | 0.604508657 | -0.101 |
| cg27074971 | II | 37 | 10 | 71072149  | HK1;HK1;HK1        | 0.42 | 0.02991  | 1.52413 | 0.74435633 | 0.844886338 | -0.101 |
| cg13630239 | II | 37 | 10 | 99116547  | RRP12;RRP12        | 0.46 | 0.01197  | 1.92207 | 0.62138925 | 0.722258608 | -0.101 |
| cg11228197 | I  | 37 | 11 | 708640    | EPS8L2             | 0.71 | 4.57E-06 | 5.34042 | 0.37049599 | 0.269977385 | 0.101  |
| cg02556649 | I  | 37 | 11 | 1945564   | TNNT3;TNNT3;TNN    | 0.42 | 0.02991  | 1.52413 | 0.85346236 | 0.752841319 | 0.101  |
| cg23162201 | I  | 37 | 11 | 8280741   | LMO1               | 0.54 | 0.0014   | 2.85345 | 0.70339584 | 0.804283969 | -0.101 |
| cg09767822 | I  | 37 | 11 | 20178040  | DBX1               | 0.54 | 0.0014   | 2.85345 | 0.31797948 | 0.418513905 | -0.101 |

|            |    |    |    |                             |      |          |         |            |             |        |
|------------|----|----|----|-----------------------------|------|----------|---------|------------|-------------|--------|
| cg07438103 | II | 37 | 11 | 47175143 C11orf49;C11orf49  | 0.58 | 0.00041  | 3.39184 | 0.60640592 | 0.505262103 | 0.101  |
| cg22705929 | II | 37 | 11 | 57417974 YPEL4              | 0.58 | 0.00041  | 3.39184 | 0.49688093 | 0.597824075 | -0.101 |
| cg25835179 | II | 37 | 11 | 67418291 ACY3               | 0.46 | 0.01197  | 1.92207 | 0.32109887 | 0.220261063 | 0.101  |
| cg19787556 | I  | 37 | 12 | 34514461                    | 0.46 | 0.01197  | 1.92207 | 0.48277694 | 0.382257925 | 0.101  |
| cg22193385 | II | 37 | 12 | 52638005 KRT7               | 0.5  | 0.00432  | 2.36443 | 0.16803793 | 0.268917436 | -0.101 |
| cg18689332 | II | 37 | 12 | 114837666 TBX5;TBX5;TBX5;TE | 0.58 | 0.00041  | 3.39184 | 0.47674612 | 0.578070727 | -0.101 |
| cg14094027 | II | 37 | 12 | 120669080 PXN;PXN;PXN       | 0.71 | 4.57E-06 | 5.34042 | 0.37813283 | 0.478737282 | -0.101 |
| cg23110109 | II | 37 | 12 | 122092127 MORN3             | 0.42 | 0.02991  | 1.52413 | 0.22472276 | 0.325357254 | -0.101 |
| cg11147471 | I  | 37 | 12 | 125087686                   | 0.46 | 0.01197  | 1.92207 | 0.44445259 | 0.545857602 | -0.101 |
| cg05514909 | II | 37 | 12 | 133022853                   | 0.46 | 0.01197  | 1.92207 | 0.6212174  | 0.722294553 | -0.101 |
| cg05868813 | II | 37 | 13 | 26594483 ATP8A2             | 0.5  | 0.00432  | 2.36443 | 0.3258231  | 0.426851667 | -0.101 |
| cg12861503 | II | 37 | 13 | 52734071 NEK3;NEK3;NEK3;N   | 0.46 | 0.01197  | 1.92207 | 0.41231023 | 0.513333042 | -0.101 |
| cg01421309 | II | 37 | 13 | 114084041 ADPRHL1;ADPRHL1   | 0.58 | 0.00041  | 3.39184 | 0.35260556 | 0.453960667 | -0.101 |
| cg16512163 | II | 37 | 13 | 114888551 RASA3             | 0.42 | 0.02991  | 1.52413 | 0.74868118 | 0.849801457 | -0.101 |
| cg03526920 | II | 37 | 14 | 77291706 C14orf166B         | 0.42 | 0.02991  | 1.52413 | 0.79444726 | 0.693601019 | 0.101  |
| cg02220617 | II | 37 | 14 | 102312533 PPP2R5C;PPP2R5C;  | 0.46 | 0.01197  | 1.92207 | 0.7840077  | 0.683047812 | 0.101  |
| cg15457934 | I  | 37 | 14 | 104652835                   | 0.62 | 0.0001   | 3.98291 | 0.93716292 | 0.836569893 | 0.101  |
| cg06861988 | II | 37 | 15 | 25319513                    | 0.54 | 0.0014   | 2.85345 | 0.62498927 | 0.726201476 | -0.101 |
| cg18738367 | II | 37 | 15 | 79238723 CTSH;CTSH          | 0.42 | 0.02991  | 1.52413 | 0.13306824 | 0.233907268 | -0.101 |
| cg09830866 | I  | 37 | 16 | 771714 FAM173A              | 0.62 | 0.0001   | 3.98291 | 0.51824798 | 0.417419575 | 0.101  |
| cg16524242 | I  | 37 | 16 | 1538355 C16orf38            | 0.5  | 0.00432  | 2.36443 | 0.57836931 | 0.679501253 | -0.101 |
| cg00809164 | I  | 37 | 16 | 56651049 MT1L               | 0.46 | 0.01197  | 1.92207 | 0.23855634 | 0.339094268 | -0.101 |
| cg09317371 | I  | 37 | 16 | 57180175 CPNE2              | 0.5  | 0.00432  | 2.36443 | 0.82061894 | 0.921346539 | -0.101 |
| cg04250732 | II | 37 | 16 | 57391655 CCL22              | 0.42 | 0.02991  | 1.52413 | 0.60623769 | 0.70722538  | -0.101 |
| cg08310837 | II | 37 | 16 | 67572860 FAM65A             | 0.46 | 0.01197  | 1.92207 | 0.27928213 | 0.380203704 | -0.101 |
| cg27262054 | I  | 37 | 16 | 73067525 ZFH3;ZFH3          | 0.46 | 0.01197  | 1.92207 | 0.64948257 | 0.548518509 | 0.101  |
| cg13391235 | II | 37 | 16 | 85316611                    | 0.62 | 0.0001   | 3.98291 | 0.64753698 | 0.54660631  | 0.101  |
| cg21491107 | II | 37 | 16 | 85649026 KIAA0182;KIAA018:  | 0.58 | 0.00041  | 3.39184 | 0.36252505 | 0.463112811 | -0.101 |
| cg04267828 | II | 37 | 16 | 85741460 C16orf74           | 0.46 | 0.01197  | 1.92207 | 0.81089734 | 0.710092359 | 0.101  |
| cg01810713 | II | 37 | 16 | 85966031                    | 0.46 | 0.01197  | 1.92207 | 0.74707628 | 0.646325362 | 0.101  |
| cg08161325 | I  | 37 | 16 | 88122741                    | 0.71 | 4.57E-06 | 5.34042 | 0.8502953  | 0.951610261 | -0.101 |
| cg06647693 | I  | 37 | 16 | 88590340 ZFPM1              | 0.5  | 0.00432  | 2.36443 | 0.56536083 | 0.666225482 | -0.101 |
| cg01366670 | II | 37 | 16 | 89004378 CBFA2T3;CBFA2T3    | 0.58 | 0.00041  | 3.39184 | 0.42799004 | 0.529350336 | -0.101 |

|            |    |    |    |                                     |      |         |         |            |             |        |
|------------|----|----|----|-------------------------------------|------|---------|---------|------------|-------------|--------|
| cg05231226 | II | 37 | 16 | 89171772 ACSF3;ACSF3;ACSF3          | 0.5  | 0.00432 | 2.36443 | 0.72268142 | 0.622147288 | 0.101  |
| cg20972466 | II | 37 | 16 | 89679595 DPEP1                      | 0.42 | 0.02991 | 1.52413 | 0.32050792 | 0.219017756 | 0.101  |
| cg26771557 | II | 37 | 17 | 16955261 MPRIP;MPRIP                | 0.62 | 0.0001  | 3.98291 | 0.33279203 | 0.433845806 | -0.101 |
| cg05114606 | II | 37 | 17 | 21274193                            | 0.46 | 0.01197 | 1.92207 | 0.32809533 | 0.429329612 | -0.101 |
| cg01809214 | II | 37 | 17 | 39781055 KRT17                      | 0.5  | 0.00432 | 2.36443 | 0.46546829 | 0.566133334 | -0.101 |
| cg25109721 | II | 37 | 17 | 48125064                            | 0.5  | 0.00432 | 2.36443 | 0.26803725 | 0.368882158 | -0.101 |
| cg00443981 | I  | 37 | 17 | 58499679 C17orf64                   | 0.5  | 0.00432 | 2.36443 | 0.84373281 | 0.944488035 | -0.101 |
| cg22122808 | II | 37 | 17 | 61511683 CYB561;CYB561;CYB561       | 0.46 | 0.01197 | 1.92207 | 0.25622521 | 0.357171413 | -0.101 |
| cg12884495 | II | 37 | 17 | 73842017 WBP2;UNC13D                | 0.58 | 0.00041 | 3.39184 | 0.7370206  | 0.838491214 | -0.101 |
| cg23601515 | II | 37 | 17 | 74017805 EVPL                       | 0.5  | 0.00432 | 2.36443 | 0.58959247 | 0.690521879 | -0.101 |
| cg10584478 | I  | 37 | 17 | 79422530 BAHCC1                     | 0.46 | 0.01197 | 1.92207 | 0.80121541 | 0.901863473 | -0.101 |
| cg15982419 | II | 37 | 18 | 9474707 RALBP1                      | 0.46 | 0.01197 | 1.92207 | 0.41905481 | 0.520223956 | -0.101 |
| cg00266920 | II | 37 | 18 | 55021277 ST8SIA3                    | 0.54 | 0.0014  | 2.85345 | 0.18510644 | 0.286300033 | -0.101 |
| cg19165390 | II | 37 | 18 | 56932082                            | 0.58 | 0.00041 | 3.39184 | 0.28431107 | 0.385732972 | -0.101 |
| cg25697727 | I  | 37 | 19 | 291986 PPAP2C;PPAP2C;PPAP2C         | 0.58 | 0.00041 | 3.39184 | 0.65539378 | 0.756542925 | -0.101 |
| cg21586152 | I  | 37 | 19 | 853540 ELANE                        | 0.42 | 0.02991 | 1.52413 | 0.54123863 | 0.642311732 | -0.101 |
| cg04340258 | I  | 37 | 19 | 3398706 NFIC;NFIC                   | 0.58 | 0.00041 | 3.39184 | 0.70081033 | 0.801932358 | -0.101 |
| cg05718253 | II | 37 | 19 | 11347359 LOC55908;DOCK6             | 0.42 | 0.02991 | 1.52413 | 0.65807324 | 0.759443528 | -0.101 |
| cg14366490 | II | 37 | 19 | 17571825 NXNL1                      | 0.46 | 0.01197 | 1.92207 | 0.73096875 | 0.630368794 | 0.101  |
| cg24091474 | II | 37 | 19 | 36399185 TYROBP;TYROBP;TYROBP       | 0.46 | 0.01197 | 1.92207 | 0.17491088 | 0.275906994 | -0.101 |
| cg17110586 | II | 37 | 19 | 36454623                            | 0.58 | 0.00041 | 3.39184 | 0.29280365 | 0.393885795 | -0.101 |
| cg05896295 | II | 37 | 19 | 41812492 HNRNPUL1;HNRNPUL1;HNRNPUL1 | 0.42 | 0.02991 | 1.52413 | 0.31503041 | 0.415739325 | -0.101 |
| cg25528786 | II | 37 | 19 | 42082267 CEACAM21;CEACAM21;CEACAM21 | 0.46 | 0.01197 | 1.92207 | 0.25311446 | 0.353743861 | -0.101 |
| cg14511156 | II | 37 | 19 | 54604124 OSCAR;OSCAR;OSCAR          | 0.62 | 0.0001  | 3.98291 | 0.27864938 | 0.379408084 | -0.101 |
| cg15892280 | II | 37 | 21 | 40180000 ETS2                       | 0.46 | 0.01197 | 1.92207 | 0.26606054 | 0.367020995 | -0.101 |
| cg15245051 | II | 37 | 22 | 36563117 APOL3;APOL3                | 0.42 | 0.02991 | 1.52413 | 0.38123842 | 0.482112125 | -0.101 |
| cg04931184 | II | 37 | 22 | 38840560 KCNJ4;KCNJ4                | 0.46 | 0.01197 | 1.92207 | 0.59724501 | 0.496074365 | 0.101  |
| cg16154810 | II | 37 | 22 | 47135258 CERK                       | 0.5  | 0.00432 | 2.36443 | 0.42172355 | 0.522518641 | -0.101 |
| cg07596065 | II | 37 | 22 | 50984393                            | 0.42 | 0.02991 | 1.52413 | 0.57969189 | 0.680885298 | -0.101 |

1869

5749

hypomethylated

hypermethylated

total

4731

2887

7618
